# Supplementary material for: The WAVE2/miR-29/Integrin-β1 Oncogenic Signaling Axis Promotes Tumor Growth and Metastasis in Triple-negative Breast Cancer
Source: Cancer Res Commun. 2023 Jan 31;3(1):160–74. doi: 10.1158/2767-9764.CRC-22-0249 (PMC10035451; doi:10.1158/2767-9764.CRC-22-0249)
Supplement: Supplementary Data File SD1 — Raw RNA-seq Data of control vs W2-KO MDA-MB-231 cells [file crc-22-0249-s15.xlsx]

## Sheet: MB231
	CellLine	MB231	MB231	MB231	MB231	MB231	MB231
	Genotype	CTRL	CTRL	CTRL	W2	W2	W2
Row Labels	Gene	MB231_CTRL_0	MB231_CTRL_1	MB231_CTRL_2	MB231_W2_0	MB231_W2_1	MB231_W2_2	gene_id	gene	locus	sample_1	sample_2	status	value_1	value_2	log2(fold_change)	test_stat	p_value	q_value	MB231_CTRLvMB231_W2
ENSG00000000003.14	TSPAN6	20.3492	20.0198	21.777	34.0112	33.9289	37.1846	ENSG00000000003.14	TSPAN6	chrX:100627108-100639991	MB231_CTRL	MB231_W2	OK	20.7153	35.0416	0.758369	3.76827	5e-05	0.000503098	yes
ENSG00000000419.12	DPM1	26.0552	27.1466	26.059	35.9235	41.5066	52.1264	ENSG00000000419.12	DPM1	chr20:50888918-50958555	MB231_CTRL	MB231_W2	OK	26.4203	43.1855	0.708902	1.71809	0.0028	0.01604	yes
ENSG00000000457.13	SCYL3	4.03069	4.31529	4.18883	5.38088	5.46441	7.02799	ENSG00000000457.13	SCYL3	chr1:169662006-169894267	MB231_CTRL	MB231_W2	OK	4.17827	5.95776	0.511863	1.41322	0.0115	0.0495779	yes
ENSG00000001167.14	NFYA	28.7289	30.7031	30.5019	18.9431	20.866	18.0675	ENSG00000001167.14	NFYA	chr6:41026910-41099976	MB231_CTRL	MB231_W2	OK	29.978	19.2922	-0.635886	-2.89538	5e-05	0.000503098	yes
ENSG00000001461.16	NIPAL3	18.0569	19.9404	17.7982	14.2918	15.0625	11.9378	ENSG00000001461.16	NIPAL3	chr1:24307555-24472976	MB231_CTRL	MB231_W2	OK	18.5985	13.764	-0.43428	-1.67975	0.00585	0.0291483	yes
ENSG00000001561.6	ENPP4	4.50978	4.12303	4.77557	5.27199	7.77223	8.15613	ENSG00000001561.6	ENPP4	chr6:46129992-46146699	MB231_CTRL	MB231_W2	OK	4.46946	7.06678	0.660953	2.80135	5e-05	0.000503098	yes
ENSG00000001630.15	CYP51A1	41.0271	48.1902	45.2556	20.1727	24.0294	26.7827	ENSG00000001630.15	CYP51A1	chr7:92112150-92180725	MB231_CTRL	MB231_W2	OK	44.8243	23.6616	-0.921733	-5.13482	5e-05	0.000503098	yes
ENSG00000001631.15	KRIT1	14.2226	12.3848	14.3594	24.9287	16.5631	21.649	ENSG00000001631.15	KRIT1	chr7:92198968-92246166	MB231_CTRL	MB231_W2	OK	13.6556	21.0469	0.624118	1.30167	0.00665	0.0322099	yes
ENSG00000002549.12	LAP3	24.9388	27.7533	31.1778	13.069	13.5283	14.8338	ENSG00000002549.12	LAP3	chr4:17577191-17614571	MB231_CTRL	MB231_W2	OK	27.9567	13.8104	-1.01744	-2.98143	5e-05	0.000503098	yes
ENSG00000002586.18	CD99	106.37	117.209	111.919	55.9082	65.2317	72.1948	ENSG00000002586.18	CD99	chrX:2691178-2741309	MB231_CTRL	MB231_W2	OK	111.833	64.4449	-0.795206	-4.4632	5e-05	0.000503098	yes
ENSG00000002822.15	MAD1L1	54.1514	59.169	36.9744	28.494	30.0202	33.8326	ENSG00000002822.15	MAD1L1	chr7:1815792-2233243	MB231_CTRL	MB231_W2	OK	50.0983	30.7823	-0.702661	-1.65386	0.00415	0.0221008	yes
ENSG00000002834.17	LASP1	194.999	214	197.568	113.101	122.127	126.669	ENSG00000002834.17	LASP1	chr17:38869858-38921770	MB231_CTRL	MB231_W2	OK	202.189	120.632	-0.745085	-4.24619	5e-05	0.000503098	yes
ENSG00000003137.8	CYP26B1	1.82013	1.36772	1.03185	5.21095	3.69239	3.06541	ENSG00000003137.8	CYP26B1	chr2:72129237-72148038	MB231_CTRL	MB231_W2	OK	1.40657	3.98958	1.50406	1.5136	0.00185	0.0114022	yes
ENSG00000003147.17	ICA1	1.15087	1.15443	0.741953	2.12595	6.12454	3.27548	ENSG00000003147.17	ICA1	chr7:8113183-8344516	MB231_CTRL	MB231_W2	OK	1.01575	3.84199	1.91931	1.19512	5e-05	0.000503098	yes
ENSG00000003436.14	TFPI	90.4148	104.287	103.987	74.0025	70.0706	72.3326	ENSG00000003436.14	TFPI	chr2:187001875-187565760	MB231_CTRL	MB231_W2	OK	99.5631	72.1352	-0.464907	-2.30045	5e-05	0.000503098	yes
ENSG00000003509.15	NDUFAF7	2.96127	5.11012	4.59537	6.92469	13.3955	9.34439	ENSG00000003509.15	NDUFAF7	chr2:37167819-37324808	MB231_CTRL	MB231_W2	OK	4.22226	9.88819	1.22769	1.14605	0.01055	0.0464399	yes
ENSG00000003756.16	RBM5	47.2391	50.0202	56.0148	73.8414	75.8767	91.4188	ENSG00000003756.16	RBM5	chr3:49940006-50189075	MB231_CTRL	MB231_W2	OK	51.0914	80.379	0.653739	1.89628	0.0004	0.00314441	yes
ENSG00000003989.16	SLC7A2	7.57318	8.35003	9.49197	4.11734	4.65433	4.18551	ENSG00000003989.16	SLC7A2	chr8:17497087-17570573	MB231_CTRL	MB231_W2	OK	8.47173	4.31906	-0.971938	-4.39777	5e-05	0.000503098	yes
ENSG00000004142.11	POLDIP2	57.4823	62.931	58.6357	35.4438	42.8087	51.1212	ENSG00000004142.11	POLDIP2	chr17:28347176-28357522	MB231_CTRL	MB231_W2	OK	59.683	43.1245	-0.46881	-2.86813	5e-05	0.000503098	yes
ENSG00000004399.12	PLXND1	7.80012	9.19692	6.97996	7.94857	17.5128	14.0047	ENSG00000004399.12	PLXND1	chr3:129555174-129606818	MB231_CTRL	MB231_W2	OK	7.99233	13.1554	0.718962	1.421	0.00355	0.0194305	yes
ENSG00000004478.7	FKBP4	35.9953	40.9409	39.9424	19.6033	23.8019	21.3691	ENSG00000004478.7	FKBP4	chr12:1946053-2941140	MB231_CTRL	MB231_W2	OK	38.9596	21.5914	-0.851519	-1.54125	0.0012	0.00797254	yes
ENSG00000004487.15	KDM1A	36.0572	41.302	42.517	23.3404	20.6334	27.1253	ENSG00000004487.15	KDM1A	chr1:23019447-23177808	MB231_CTRL	MB231_W2	OK	39.9587	23.6997	-0.753642	-2.42373	0.0001	0.000939965	yes
ENSG00000004777.18	ARHGAP33	2.34945	3.32651	4.17149	9.12678	10.183	10.5688	ENSG00000004777.18	ARHGAP33	chr19:35774531-35797902	MB231_CTRL	MB231_W2	OK	3.28248	9.95955	1.60129	1.91724	5e-05	0.000503098	yes
ENSG00000004779.9	NDUFAB1	88.1827	78.5727	92.1707	119.254	123.318	120.992	ENSG00000004779.9	NDUFAB1	chr16:23581001-23596356	MB231_CTRL	MB231_W2	OK	86.3087	121.188	0.489667	2.84919	5e-05	0.000503098	yes
ENSG00000004961.14	HCCS	31.696	34.591	35.8458	16.5878	22.6644	15.1164	ENSG00000004961.14	HCCS	chrX:11111300-11123078	MB231_CTRL	MB231_W2	OK	34.0442	18.1229	-0.909598	-4.50598	5e-05	0.000503098	yes
ENSG00000004975.11	DVL2	26.8987	23.3267	20.5911	35.1133	36.7224	39.9368	ENSG00000004975.11	DVL2	chr17:7225340-7234545	MB231_CTRL	MB231_W2	OK	23.6055	37.2575	0.658407	2.39229	5e-05	0.000503098	yes
ENSG00000005001.9	PRSS22	1.6551	1.18191	1.90535	3.8723	8.65841	2.80279	ENSG00000005001.9	PRSS22	chr16:2852726-2859726	MB231_CTRL	MB231_W2	OK	1.58079	5.11117	1.69301	1.28318	0.00135	0.00878859	yes
ENSG00000005020.12	SKAP2	7.74323	12.2821	11.6448	6.39735	7.48218	6.00957	ENSG00000005020.12	SKAP2	chr7:26667061-26995239	MB231_CTRL	MB231_W2	OK	10.5567	6.6297	-0.671143	-2.06468	5e-05	0.000503098	yes
ENSG00000005075.15	POLR2J	82.6801	78.3377	81.006	97.7284	120.852	119.558	ENSG00000005075.15	POLR2J	chr7:102464928-102478907	MB231_CTRL	MB231_W2	OK	80.6746	112.713	0.482465	2.85311	5e-05	0.000503098	yes
ENSG00000005175.9	RPAP3	13.8243	15.9176	16.5743	11.5838	12.4997	10.2174	ENSG00000005175.9	RPAP3	chr12:47661248-47706061	MB231_CTRL	MB231_W2	OK	15.4387	11.4336	-0.433271	-1.52833	0.007	0.0336211	yes
ENSG00000005189.19	AC004381.6	0.660083	1.154	1.41101	1.6027	1.93356	5.97323	ENSG00000005189.19	AC004381.6	chr16:20610242-20925006	MB231_CTRL	MB231_W2	OK	1.07503	3.16983	1.56003	0.659542	0.0063	0.0308862	yes
ENSG00000005206.16	SPPL2B	8.86295	11.2613	9.58355	35.2516	37.2603	30.7767	ENSG00000005206.16	SPPL2B	chr19:2252251-2354806	MB231_CTRL	MB231_W2	OK	9.90259	34.4295	1.79777	2.22232	5e-05	0.000503098	yes
ENSG00000005379.15	TSPOAP1	0.926277	0.609192	0.754194	4.80607	1.51536	5.57629	ENSG00000005379.15	TSPOAP1	chr17:58301227-58417595	MB231_CTRL	MB231_W2	OK	0.763221	3.96591	2.37748	1.17718	5e-05	0.000503098	yes
ENSG00000005469.11	CROT	2.24642	4.50492	3.92172	12.0658	7.44063	7.5926	ENSG00000005469.11	CROT	chr7:87345680-87399795	MB231_CTRL	MB231_W2	OK	3.55769	9.03303	1.34427	1.93357	0.00035	0.00280437	yes
ENSG00000005801.16	ZNF195	8.56489	8.65212	10.7465	20.7482	17.0604	30.1185	ENSG00000005801.16	ZNF195	chr11:3336720-3379222	MB231_CTRL	MB231_W2	OK	9.32118	22.6424	1.28044	2.4491	5e-05	0.000503098	yes
ENSG00000005889.15	ZFX	16.2331	21.6931	25.1499	12.6736	11.6396	16.5181	ENSG00000005889.15	ZFX	chrX:24146224-24216255	MB231_CTRL	MB231_W2	OK	21.0254	13.6105	-0.627417	-1.58556	0.00565	0.0283572	yes
ENSG00000006025.11	OSBPL7	2.08106	2.04888	1.9777	4.99897	6.14629	4.83232	ENSG00000006025.11	OSBPL7	chr17:47807371-47821834	MB231_CTRL	MB231_W2	OK	2.03588	5.32586	1.38736	1.4506	0.001	0.00683457	yes
ENSG00000006062.13	MAP3K14	9.52206	9.15045	14.053	19.0504	19.7972	22.2133	ENSG00000006062.13	MAP3K14	chr17:45190930-45317040	MB231_CTRL	MB231_W2	OK	10.9085	20.3536	0.89983	2.32101	5e-05	0.000503098	yes
ENSG00000006125.16	AP2B1	80.1739	82.9908	88.3375	55.7976	44.8164	55.0497	ENSG00000006125.16	AP2B1	chr17:35574794-35868891	MB231_CTRL	MB231_W2	OK	83.8341	51.8879	-0.692138	-2.2161	5e-05	0.000503098	yes
ENSG00000006210.6	CX3CL1	3.97817	3.36479	3.75464	1.7436	1.88279	1.36828	ENSG00000006210.6	CX3CL1	chr16:57372457-57385048	MB231_CTRL	MB231_W2	OK	3.6992	1.66489	-1.15179	-2.22307	0.0002	0.00172918	yes
ENSG00000006282.20	SPATA20	12.9432	18.3425	15.3032	18.7996	30.7327	29.9637	ENSG00000006282.20	SPATA20	chr17:50532542-50555852	MB231_CTRL	MB231_W2	OK	15.5296	26.4986	0.770897	1.93128	0.0002	0.00172918	yes
ENSG00000006451.7	RALA	43.0262	42.8238	56.4281	26.359	35.8566	31.8127	ENSG00000006451.7	RALA	chr7:39623482-39708124	MB231_CTRL	MB231_W2	OK	47.4261	31.3428	-0.597546	-2.21362	0.00085	0.00593698	yes
ENSG00000006453.13	BAIAP2L1	11.9007	14.7564	14.4948	16.0997	22.3801	22.0321	ENSG00000006453.13	BAIAP2L1	chr7:98252378-98401068	MB231_CTRL	MB231_W2	OK	13.7173	20.1707	0.55626	1.95143	0.00025	0.00209262	yes
ENSG00000006576.16	PHTF2	11.1602	11.9972	11.5085	16.2805	16.9307	16.3035	ENSG00000006576.16	PHTF2	chr7:77798791-77957503	MB231_CTRL	MB231_W2	OK	11.5553	16.5049	0.514341	1.9495	0.00065	0.00473037	yes
ENSG00000006634.7	DBF4	35.2355	49.867	41.9317	81.1815	57.2365	83.1888	ENSG00000006634.7	DBF4	chr7:87833567-87909541	MB231_CTRL	MB231_W2	OK	42.3447	73.8689	0.802785	1.89388	0.0012	0.00797254	yes
ENSG00000006652.13	IFRD1	20.3309	19.4173	23.1719	33.2086	38.8392	32.4598	ENSG00000006652.13	IFRD1	chr7:112422967-112491062	MB231_CTRL	MB231_W2	OK	20.9734	34.8359	0.732015	2.57771	5e-05	0.000503098	yes
ENSG00000007080.10	CCDC124	36.8054	45.451	42.4738	24.2788	32.9519	34.2311	ENSG00000007080.10	CCDC124	chr19:17933015-17943991	MB231_CTRL	MB231_W2	OK	41.5768	30.4873	-0.447569	-2.33365	0.00015	0.00134259	yes
ENSG00000007384.15	RHBDF1	10.0562	13.3889	6.879	16.0751	18.0597	20.6706	ENSG00000007384.15	RHBDF1	chr16:58058-76355	MB231_CTRL	MB231_W2	OK	10.108	18.2685	0.853856	2.18219	0.0002	0.00172918	yes
ENSG00000007520.3	TSR3	46.3268	46.8114	49.7377	28.1409	29.1849	29.5167	ENSG00000007520.3	TSR3	chr16:1333600-1351911	MB231_CTRL	MB231_W2	OK	47.6253	28.9475	-0.718288	-3.67609	5e-05	0.000503098	yes
ENSG00000007541.16	PIGQ	10.0902	11.3622	10.5135	14.0212	22.0541	15.5741	ENSG00000007541.16	PIGQ	chr16:566994-584136	MB231_CTRL	MB231_W2	OK	10.6553	17.2165	0.692217	1.12968	0.004	0.0214378	yes
ENSG00000007923.15	DNAJC11	18.7884	20.3375	19.3523	13.4769	17.9321	16.2585	ENSG00000007923.15	DNAJC11	chr1:6624865-6701924	MB231_CTRL	MB231_W2	OK	19.4927	15.8892	-0.294888	-1.46914	0.00835	0.0386389	yes
ENSG00000008018.8	PSMB1	261.127	282.878	278.362	179.486	190.364	217.631	ENSG00000008018.8	PSMB1	chr6:170535116-170553341	MB231_CTRL	MB231_W2	OK	274.122	195.827	-0.485241	-2.9135	5e-05	0.000503098	yes
ENSG00000008083.13	JARID2	15.521	16.4403	17.7869	11.1425	14.7865	13.3	ENSG00000008083.13	JARID2	chr6:15246295-15522040	MB231_CTRL	MB231_W2	OK	16.5827	13.0763	-0.342727	-2.0766	0.00015	0.00134259	yes
ENSG00000008128.22	CDK11A	6.84965	10.1174	7.13401	21.2729	23.1362	23.5248	ENSG00000008128.22	CDK11A	chr1:1702729-1745992	MB231_CTRL	MB231_W2	OK	8.03369	22.6447	1.49504	2.79023	5e-05	0.000503098	yes
ENSG00000008294.20	SPAG9	24.18	27.3036	28.1508	42.5526	41.1925	34.541	ENSG00000008294.20	SPAG9	chr17:50962173-51120865	MB231_CTRL	MB231_W2	OK	26.5448	39.4287	0.570816	1.37237	0.008	0.037385	yes
ENSG00000008311.14	AASS	12.1181	10.0519	10.7495	17.5365	16.2723	18.3357	ENSG00000008311.14	AASS	chr7:122075646-122144280	MB231_CTRL	MB231_W2	OK	10.9732	17.3815	0.66357	2.82308	5e-05	0.000503098	yes
ENSG00000008441.16	NFIX	24.718	27.7995	25.4379	13.3249	18.266	19.5645	ENSG00000008441.16	NFIX	chr19:12995607-13098796	MB231_CTRL	MB231_W2	OK	25.9852	17.0518	-0.607766	-2.9597	5e-05	0.000503098	yes
ENSG00000008517.16	IL32	19.6291	23.9129	22.1362	10.8975	7.63327	13.883	ENSG00000008517.16	IL32	chr16:3065296-3087100	MB231_CTRL	MB231_W2	OK	21.8927	10.8046	-1.01881	-2.29888	5e-05	0.000503098	yes
ENSG00000008710.18	PKD1	10.0741	14.8086	9.9071	31.8251	31.1299	28.5831	ENSG00000008710.18	PKD1	chr16:2039814-2135898	MB231_CTRL	MB231_W2	OK	11.5966	30.5127	1.39571	1.939	5e-05	0.000503098	yes
ENSG00000008988.9	RPS20	537.571	564.793	498.929	1239.5	1331.49	1439.78	ENSG00000008988.9	RPS20	chr8:56067294-56074581	MB231_CTRL	MB231_W2	OK	533.764	1336.92	1.32464	8.10918	5e-05	0.000503098	yes
ENSG00000009307.15	CSDE1	354.452	365.224	373.224	263.844	253.287	252.705	ENSG00000009307.15	CSDE1	chr1:114716912-114758676	MB231_CTRL	MB231_W2	OK	364.3	256.612	-0.50554	-1.84524	0.00115	0.00769031	yes
ENSG00000009780.15	FAM76A	4.32612	5.06872	4.11202	2.30903	2.99407	4.01547	ENSG00000009780.15	FAM76A	chr1:27725978-27763122	MB231_CTRL	MB231_W2	OK	4.50229	3.10619	-0.535514	-1.60654	0.0029	0.0164807	yes
ENSG00000009954.10	BAZ1B	33.8307	39.5425	43.6329	25.7279	26.6607	26.8429	ENSG00000009954.10	BAZ1B	chr7:73440397-73522278	MB231_CTRL	MB231_W2	OK	39.0021	26.4105	-0.562438	-3.13708	5e-05	0.000503098	yes
ENSG00000010165.19	METTL13	11.775	11.7614	9.77174	7.52397	9.67416	5.98533	ENSG00000010165.19	METTL13	chr1:171781663-171814023	MB231_CTRL	MB231_W2	OK	11.1027	7.72782	-0.522778	-1.42783	0.00535	0.0271868	yes
ENSG00000010244.17	ZNF207	36.1402	36.432	38.8532	58.6549	78.0259	81.1194	ENSG00000010244.17	ZNF207	chr17:32266175-32381886	MB231_CTRL	MB231_W2	OK	37.1418	72.6001	0.966928	2.62162	5e-05	0.000503098	yes
ENSG00000010256.10	UQCRC1	66.0727	74.3296	63.1988	40.2481	59.2304	47.4003	ENSG00000010256.10	UQCRC1	chr3:48599001-48610976	MB231_CTRL	MB231_W2	OK	67.8671	48.9596	-0.47112	-2.17413	0.0003	0.00245627	yes
ENSG00000010270.13	STARD3NL	14.8788	15.391	17.753	21.2449	22.4721	26.0459	ENSG00000010270.13	STARD3NL	chr7:38178221-38230671	MB231_CTRL	MB231_W2	OK	16.0076	23.2543	0.538741	2.3949	5e-05	0.000503098	yes
ENSG00000010310.8	GIPR	0.0816489	0.686657	0.0409847	1.27403	0.828001	16.2158	ENSG00000010310.8	GIPR	chr19:45668243-45683724	MB231_CTRL	MB231_W2	OK	0.269763	6.10593	4.50044	0.618846	0.0004	0.00314441	yes
ENSG00000010318.20	PHF7	6.25958	6.41856	6.4506	9.49531	11.0534	9.17707	ENSG00000010318.20	PHF7	chr3:52410656-52423641	MB231_CTRL	MB231_W2	OK	6.37625	9.9086	0.635974	1.52357	0.00205	0.0124065	yes
ENSG00000010322.15	NISCH	6.59797	8.08231	8.46371	21.2752	17.7957	29.7034	ENSG00000010322.15	NISCH	chr3:52455117-52493071	MB231_CTRL	MB231_W2	OK	7.71466	22.9248	1.57123	3.37006	5e-05	0.000503098	yes
ENSG00000010539.11	ZNF200	2.87064	3.2635	4.528	7.4158	5.78276	6.66354	ENSG00000010539.11	ZNF200	chr16:3188211-3236221	MB231_CTRL	MB231_W2	OK	3.55405	6.6207	0.897521	1.56769	0.0018	0.0111376	yes
ENSG00000011007.12	TCEB3	17.6195	21.2592	19.1017	9.96456	11.9743	11.2755	ENSG00000011007.12	TCEB3	chr1:23743154-23778287	MB231_CTRL	MB231_W2	OK	19.3268	11.0715	-0.803759	-3.60353	5e-05	0.000503098	yes
ENSG00000011009.10	LYPLA2	31.5083	35.4495	33.216	20.6051	22.4365	27.3917	ENSG00000011009.10	LYPLA2	chr1:23790969-23795539	MB231_CTRL	MB231_W2	OK	33.3913	23.4777	-0.508177	-1.67845	0.0029	0.0164807	yes
ENSG00000011021.21	CLCN6	2.18451	2.64794	3.02158	7.20644	5.30024	4.9343	ENSG00000011021.21	CLCN6	chr1:11761786-11848345	MB231_CTRL	MB231_W2	OK	2.61801	5.81366	1.15098	1.8326	0.0003	0.00245627	yes
ENSG00000011201.11	ANOS1	13.4732	14.0126	14.7703	6.95979	7.4098	6.72204	ENSG00000011201.11	ANOS1	chrX:8528873-8732186	MB231_CTRL	MB231_W2	OK	14.0854	7.03054	-1.00249	-4.43394	5e-05	0.000503098	yes
ENSG00000011243.17	AKAP8L	22.0006	17.7423	18.7967	52.4455	47.1417	43.4142	ENSG00000011243.17	AKAP8L	chr19:15353384-15419141	MB231_CTRL	MB231_W2	OK	19.5132	47.6671	1.28854	2.6289	5e-05	0.000503098	yes
ENSG00000011258.15	MBTD1	2.94215	3.20263	3.73981	4.74511	9.17724	5.61611	ENSG00000011258.15	MBTD1	chr17:51177424-51260163	MB231_CTRL	MB231_W2	OK	3.29487	6.51282	0.983063	1.77406	0.00335	0.018518	yes
ENSG00000011260.13	UTP18	29.0715	33.3953	34.5708	21.0902	25.2167	26.8685	ENSG00000011260.13	UTP18	chr17:51260527-51297936	MB231_CTRL	MB231_W2	OK	32.3459	24.3918	-0.407185	-1.61626	0.00365	0.0198601	yes
ENSG00000011332.19	DPF1	0.864957	2.21815	1.18093	3.25047	5.45505	11.5364	ENSG00000011332.19	DPF1	chr19:38211005-38229714	MB231_CTRL	MB231_W2	OK	1.42135	6.74732	2.24706	1.64697	5e-05	0.000503098	yes
ENSG00000011566.14	MAP4K3	16.3137	21.5287	12.9861	21.7881	38.2635	31.3157	ENSG00000011566.14	MAP4K3	chr2:39249265-39717963	MB231_CTRL	MB231_W2	OK	16.9428	30.4558	0.846039	1.21523	0.0116	0.0499123	yes
ENSG00000011638.10	TMEM159	11.8644	11.3648	12.8782	15.5418	19.638	16.367	ENSG00000011638.10	TMEM159	chr16:20933110-21180616	MB231_CTRL	MB231_W2	OK	12.0358	17.1823	0.513586	1.59163	0.00235	0.0138868	yes
ENSG00000012171.18	SEMA3B	4.38771	5.3517	5.59244	12.6343	9.08151	9.41434	ENSG00000012171.18	SEMA3B	chr3:50267557-50277546	MB231_CTRL	MB231_W2	OK	5.11062	10.3767	1.02178	0.992205	0.00815	0.0379314	yes
ENSG00000012174.11	MBTPS2	12.8297	14.7813	14.5307	8.65368	8.38078	8.21186	ENSG00000012174.11	MBTPS2	chrX:21839635-21885424	MB231_CTRL	MB231_W2	OK	14.0472	8.41544	-0.739173	-3.39403	5e-05	0.000503098	yes
ENSG00000012232.8	EXTL3	12.3223	15.1604	11.9133	9.11695	8.55691	10.4399	ENSG00000012232.8	EXTL3	chr8:28600468-28755599	MB231_CTRL	MB231_W2	OK	13.132	9.37126	-0.48677	-1.42188	0.00245	0.0143789	yes
ENSG00000012660.13	ELOVL5	155.657	162.293	165.825	131.839	135.191	123.185	ENSG00000012660.13	ELOVL5	chr6:53267397-53349179	MB231_CTRL	MB231_W2	OK	161.258	130.072	-0.310066	-1.77202	0.0017	0.0106371	yes
ENSG00000012822.15	CALCOCO1	8.95994	10.4846	11.0449	18.159	15.8461	17.2224	ENSG00000012822.15	CALCOCO1	chr12:53708516-53727745	MB231_CTRL	MB231_W2	OK	10.1632	17.0758	0.748605	1.57034	0.001	0.00683457	yes
ENSG00000013275.7	PSMC4	54.2454	52.5136	52.0837	37.4336	39.9392	37.6036	ENSG00000013275.7	PSMC4	chr19:39971004-39981441	MB231_CTRL	MB231_W2	OK	52.9475	38.3255	-0.46626	-2.64389	5e-05	0.000503098	yes
ENSG00000013364.18	MVP	36.245	44.0901	38.1496	13.404	15.618	40.6125	ENSG00000013364.18	MVP	chr16:29806105-29848039	MB231_CTRL	MB231_W2	OK	39.4949	23.2115	-0.766826	-1.49058	0.0101	0.0448503	yes
ENSG00000013374.15	NUB1	32.0259	32.9951	30.6979	19.2014	23.3124	27.6078	ENSG00000013374.15	NUB1	chr7:151341698-151413354	MB231_CTRL	MB231_W2	OK	31.9063	23.3739	-0.448945	-1.63724	0.00565	0.0283572	yes
ENSG00000013441.15	CLK1	19.0856	19.2691	21.0074	52.3655	49.9621	47.132	ENSG00000013441.15	CLK1	chr2:200853008-200864744	MB231_CTRL	MB231_W2	OK	19.7874	49.8199	1.33214	4.93396	5e-05	0.000503098	yes
ENSG00000013561.17	RNF14	29.9479	29.9439	31.2153	19.2205	25.2408	22.143	ENSG00000013561.17	RNF14	chr5:141943584-141990291	MB231_CTRL	MB231_W2	OK	30.369	22.2014	-0.451949	-1.8192	0.00045	0.00346901	yes
ENSG00000013573.16	DDX11	9.48884	8.73962	11.1809	29.5429	35.8913	47.426	ENSG00000013573.16	DDX11	chr12:31020762-31104791	MB231_CTRL	MB231_W2	OK	9.80314	37.6201	1.94019	4.78499	5e-05	0.000503098	yes
ENSG00000013583.8	HEBP1	41.9096	45.0424	43.9885	25.4263	30.7433	26.637	ENSG00000013583.8	HEBP1	chr12:12927725-13000273	MB231_CTRL	MB231_W2	OK	43.6469	27.6022	-0.661095	-3.26201	5e-05	0.000503098	yes
ENSG00000013810.18	TACC3	58.7978	59.078	58.5766	70.3852	77.2253	80.5797	ENSG00000013810.18	TACC3	chr4:1721489-1745176	MB231_CTRL	MB231_W2	OK	58.8174	76.0634	0.370959	1.77257	0.0026	0.0150954	yes
ENSG00000014216.15	CAPN1	65.1897	67.3982	67.0102	36.6659	46.4301	51.8448	ENSG00000014216.15	CAPN1	chr11:65177605-65212006	MB231_CTRL	MB231_W2	OK	66.5327	44.9803	-0.564772	-1.91184	0.0008	0.00564084	yes
ENSG00000014914.19	MTMR11	2.45445	4.23799	2.62881	10.2301	12.7788	13.4264	ENSG00000014914.19	MTMR11	chr1:149928650-149936898	MB231_CTRL	MB231_W2	OK	3.10708	12.1451	1.96674	3.34765	5e-05	0.000503098	yes
ENSG00000015171.18	ZMYND11	19.0368	22.9214	21.6221	12.1888	16.3534	14.0446	ENSG00000015171.18	ZMYND11	chr10:134464-254637	MB231_CTRL	MB231_W2	OK	21.1934	14.1956	-0.578171	-3.18314	5e-05	0.000503098	yes
ENSG00000015676.17	NUDCD3	49.3745	64.3691	59.4764	40.4458	43.5594	42.1434	ENSG00000015676.17	NUDCD3	chr7:44379120-44490880	MB231_CTRL	MB231_W2	OK	57.74	42.0495	-0.457482	-1.55459	0.00645	0.0314181	yes
ENSG00000017797.11	RALBP1	30.9737	32.568	34.0772	19.5706	18.041	20.0002	ENSG00000017797.11	RALBP1	chr18:9475008-9538116	MB231_CTRL	MB231_W2	OK	32.5396	19.204	-0.760793	-4.36345	5e-05	0.000503098	yes
ENSG00000018189.12	RUFY3	5.354	6.83269	7.61869	15.3981	19.4918	13.9782	ENSG00000018189.12	RUFY3	chr4:70703746-70807315	MB231_CTRL	MB231_W2	OK	6.60179	16.2893	1.303	1.95886	5e-05	0.000503098	yes
ENSG00000018510.13	AGPS	25.3947	25.6875	30.8993	14.1795	15.0537	18.804	ENSG00000018510.13	AGPS	chr2:177227594-177559299	MB231_CTRL	MB231_W2	OK	27.3272	16.0124	-0.771146	-1.63064	0.00605	0.0299125	yes
ENSG00000019144.17	PHLDB1	15.7884	13.3764	17.2425	22.1377	29.3768	25.439	ENSG00000019144.17	PHLDB1	chr11:118606439-118679690	MB231_CTRL	MB231_W2	OK	15.4691	25.6511	0.729635	1.68735	0.00035	0.00280437	yes
ENSG00000019549.8	SNAI2	18.435	20.102	21.8177	22.5	27.449	26.5811	ENSG00000019549.8	SNAI2	chr8:48917689-48921740	MB231_CTRL	MB231_W2	OK	20.1182	25.51	0.34256	1.86445	0.00095	0.00654723	yes
ENSG00000019582.14	CD74	273.408	327.632	285.852	179.627	211.345	184.859	ENSG00000019582.14	CD74	chr5:150401636-150412929	MB231_CTRL	MB231_W2	OK	295.631	191.944	-0.623113	-3.72328	5e-05	0.000503098	yes
ENSG00000020426.10	MNAT1	31.0375	33.4047	28.4983	45.2541	55.9196	68.2094	ENSG00000020426.10	MNAT1	chr14:60734741-61083733	MB231_CTRL	MB231_W2	OK	30.9802	56.461	0.86591	2.05963	0.00075	0.00534003	yes
ENSG00000020577.13	SAMD4A	13.7558	11.9147	11.9484	20.6482	25.7709	29.3127	ENSG00000020577.13	SAMD4A	chr14:54567096-54793315	MB231_CTRL	MB231_W2	OK	12.5396	25.2439	1.00944	3.21791	5e-05	0.000503098	yes
ENSG00000021355.12	SERPINB1	64.8469	62.705	63.7375	46.1242	50.4305	49.1577	ENSG00000021355.12	SERPINB1	chr6:2832331-2842006	MB231_CTRL	MB231_W2	OK	63.7631	48.5708	-0.392633	-1.64747	0.0041	0.0218807	yes
ENSG00000021574.11	SPAST	4.10848	4.7929	4.70049	2.26011	2.78796	3.81816	ENSG00000021574.11	SPAST	chr2:32063610-32157637	MB231_CTRL	MB231_W2	OK	4.53395	2.95541	-0.617411	-2.32881	5e-05	0.000503098	yes
ENSG00000022277.12	RTFDC1	39.8998	42.9409	42.5637	31.6873	36.4971	31.5559	ENSG00000022277.12	RTFDC1	chr20:56468584-56526142	MB231_CTRL	MB231_W2	OK	41.8015	33.2468	-0.330341	-1.75803	0.0023	0.0136382	yes
ENSG00000022976.15	ZNF839	2.96056	2.60793	4.44339	8.40245	10.0409	12.3982	ENSG00000022976.15	ZNF839	chr14:102317376-102362916	MB231_CTRL	MB231_W2	OK	3.33729	10.2805	1.62316	3.15865	5e-05	0.000503098	yes
ENSG00000023041.11	ZDHHC6	17.8466	18.9299	21.2382	29.0936	36.805	34.3441	ENSG00000023041.11	ZDHHC6	chr10:112374017-112446917	MB231_CTRL	MB231_W2	OK	19.3382	33.4142	0.789006	2.33571	5e-05	0.000503098	yes
ENSG00000023191.16	RNH1	117.255	121.286	111.198	61.8978	84.8034	79.2896	ENSG00000023191.16	RNH1	chr11:494511-507300	MB231_CTRL	MB231_W2	OK	116.58	75.3303	-0.630018	-3.57806	5e-05	0.000503098	yes
ENSG00000023330.14	ALAS1	17.6621	19.3081	19.9634	15.0594	13.9391	14.6806	ENSG00000023330.14	ALAS1	chr3:52198085-52214327	MB231_CTRL	MB231_W2	OK	18.9778	14.5597	-0.382336	-1.77659	0.0007	0.00502945	yes
ENSG00000023516.8	AKAP11	10.1318	11.9375	12.4972	7.06365	7.22566	7.54616	ENSG00000023516.8	AKAP11	chr13:42272152-42323267	MB231_CTRL	MB231_W2	OK	11.5222	7.27849	-0.662701	-4.14851	5e-05	0.000503098	yes
ENSG00000023909.9	GCLM	31.0771	30.9609	35.5162	24.9533	23.2124	22.3722	ENSG00000023909.9	GCLM	chr1:93885204-93909456	MB231_CTRL	MB231_W2	OK	32.5181	23.5126	-0.467806	-2.46508	5e-05	0.000503098	yes
ENSG00000024048.10	UBR2	18.5828	19.4028	20.8063	14.2564	11.5897	14.7308	ENSG00000024048.10	UBR2	chr6:42564061-42693504	MB231_CTRL	MB231_W2	OK	19.5973	13.5257	-0.534957	-2.69936	5e-05	0.000503098	yes
ENSG00000024422.11	EHD2	66.9231	72.3291	64.0912	33.1521	37.6627	32.2221	ENSG00000024422.11	EHD2	chr19:47607523-47743134	MB231_CTRL	MB231_W2	OK	67.7811	34.3456	-0.980756	-5.48232	5e-05	0.000503098	yes
ENSG00000024526.16	DEPDC1	37.4545	39.5893	40.5034	54.4444	52.5938	46.4329	ENSG00000024526.16	DEPDC1	chr1:68474151-68538627	MB231_CTRL	MB231_W2	OK	39.1824	51.157	0.384725	1.61483	0.0043	0.0227428	yes
ENSG00000025039.14	RRAGD	10.0994	9.68656	9.30345	5.63088	6.82947	10.0888	ENSG00000025039.14	RRAGD	chr6:89364635-89412270	MB231_CTRL	MB231_W2	OK	9.69648	7.51637	-0.367425	-1.44347	0.01135	0.0491271	yes
ENSG00000025770.18	NCAPH2	9.5239	8.51585	9.75192	13.301	12.6435	14.1708	ENSG00000025770.18	NCAPH2	chr22:50508215-50523472	MB231_CTRL	MB231_W2	OK	9.26389	13.3718	0.5295	1.5679	0.0028	0.01604	yes
ENSG00000025772.7	TOMM34	41.9102	46.0741	43.7948	30.3546	37.6331	37.6239	ENSG00000025772.7	TOMM34	chr20:44910061-44960486	MB231_CTRL	MB231_W2	OK	43.9264	35.2038	-0.319355	-1.71685	0.00405	0.0216567	yes
ENSG00000025800.13	KPNA6	30.2335	35.1864	34.2485	15.4905	18.5662	18.0618	ENSG00000025800.13	KPNA6	chr1:32108037-32176568	MB231_CTRL	MB231_W2	OK	33.2228	17.3728	-0.935343	-5.79731	5e-05	0.000503098	yes
ENSG00000026025.14	VIM	1343.29	1449.06	1356.32	888.088	967.264	880.41	ENSG00000026025.14	VIM	chr10:17214238-17237593	MB231_CTRL	MB231_W2	OK	1382.89	911.921	-0.600705	-2.20114	0.0002	0.00172918	yes
ENSG00000026036.21	RTEL1-TNFRSF6B	1.58198	2.04373	1.2178	8.41936	8.3794	9.18789	ENSG00000026036.21	RTEL1-TNFRSF6B	chr20:63657809-63743505	MB231_CTRL	MB231_W2	OK	1.6145	8.66222	2.42364	3.25701	5e-05	0.000503098	yes
ENSG00000026297.15	RNASET2	24.9185	32.5823	29.7064	12.778	10.9555	16.33	ENSG00000026297.15	RNASET2	chr6:166409363-166957191	MB231_CTRL	MB231_W2	OK	29.0691	13.3545	-1.12216	-3.52759	5e-05	0.000503098	yes
ENSG00000026508.16	CD44	347.288	376.867	358.602	260.92	274.719	272.454	ENSG00000026508.16	CD44	chr11:35138869-35232402	MB231_CTRL	MB231_W2	OK	360.919	269.364	-0.422118	-1.74919	0.0027	0.0155661	yes
ENSG00000027075.13	PRKCH	1.38655	2.07785	0.734292	3.49338	2.85972	4.26966	ENSG00000027075.13	PRKCH	chr14:61187558-61658696	MB231_CTRL	MB231_W2	OK	1.39956	3.54092	1.33915	0.565645	0.00045	0.00346901	yes
ENSG00000029534.19	ANK1	2.56124	2.80762	2.54695	1.77317	1.38679	1.36185	ENSG00000029534.19	ANK1	chr8:41653219-41896762	MB231_CTRL	MB231_W2	OK	2.63861	1.50727	-0.807837	-0.894568	0.00585	0.0291483	yes
ENSG00000030110.12	BAK1	24.7369	30.2248	26.5201	14.2299	20.0402	14.9395	ENSG00000030110.12	BAK1	chr6:33540045-33593338	MB231_CTRL	MB231_W2	OK	27.1606	16.4032	-0.727538	-3.62416	5e-05	0.000503098	yes
ENSG00000030582.16	GRN	137.433	161.314	151.143	93.9235	108.644	78.8915	ENSG00000030582.16	GRN	chr17:44345085-44353102	MB231_CTRL	MB231_W2	OK	149.963	93.8197	-0.676646	-2.94149	5e-05	0.000503098	yes
ENSG00000031691.6	CENPQ	6.40152	9.87334	8.79931	10.5457	15.5925	11.9593	ENSG00000031691.6	CENPQ	chr6:49463377-49493107	MB231_CTRL	MB231_W2	OK	8.35806	12.6992	0.603495	2.76845	5e-05	0.000503098	yes
ENSG00000033030.13	ZCCHC8	9.27725	13.3799	10.3766	12.7213	18.5269	16.1463	ENSG00000033030.13	ZCCHC8	chr12:122471599-122501073	MB231_CTRL	MB231_W2	OK	11.0112	15.7982	0.520781	1.72393	0.0021	0.0126444	yes
ENSG00000033050.7	ABCF2	38.6989	42.2763	39.4725	25.3355	28.4035	32.231	ENSG00000033050.7	ABCF2	chr7:151207836-151227230	MB231_CTRL	MB231_W2	OK	40.1492	28.6566	-0.486503	-2.03728	0.00185	0.0114022	yes
ENSG00000033178.12	UBA6	44.7141	52.7492	54.2023	35.4046	34.8123	31.9526	ENSG00000033178.12	UBA6	chr4:67612651-67701179	MB231_CTRL	MB231_W2	OK	50.5552	34.0565	-0.56993	-2.02964	0.00035	0.00280437	yes
ENSG00000033867.16	SLC4A7	11.556	15.0988	16.0904	18.7322	24.123	21.9135	ENSG00000033867.16	SLC4A7	chr3:27372720-27484420	MB231_CTRL	MB231_W2	OK	14.2484	21.5896	0.599533	1.48296	0.01065	0.0467984	yes
ENSG00000034713.7	GABARAPL2	31.248	30.1482	25.9405	37.5508	51.5081	37.7922	ENSG00000034713.7	GABARAPL2	chr16:75528531-75623300	MB231_CTRL	MB231_W2	OK	29.1122	42.2837	0.538476	1.8454	0.00175	0.0108959	yes
ENSG00000035115.21	SH3YL1	2.478	2.71192	1.93754	5.63895	5.60164	8.94426	ENSG00000035115.21	SH3YL1	chr2:217729-278283	MB231_CTRL	MB231_W2	OK	2.37582	6.72829	1.50181	1.12263	0.0007	0.00502945	yes
ENSG00000035403.16	VCL	71.3226	76.411	79.4697	37.4325	50.8596	47.6514	ENSG00000035403.16	VCL	chr10:73995192-74151063	MB231_CTRL	MB231_W2	OK	75.7344	45.3145	-0.740977	-2.70639	0.0001	0.000939965	yes
ENSG00000035499.12	DEPDC1B	13.7596	18.2968	18.7554	23.8677	28.8187	26.6896	ENSG00000035499.12	DEPDC1B	chr5:60596911-60700190	MB231_CTRL	MB231_W2	OK	16.9372	26.4587	0.643542	2.40917	0.00015	0.00134259	yes
ENSG00000035862.12	TIMP2	186.264	211.479	195.701	133.274	144.48	140.493	ENSG00000035862.12	TIMP2	chr17:78852976-78925387	MB231_CTRL	MB231_W2	OK	197.815	139.416	-0.504757	-3.13675	5e-05	0.000503098	yes
ENSG00000036257.12	CUL3	45.7262	47.9102	41.2372	26.5593	24.7198	30.9188	ENSG00000036257.12	CUL3	chr2:224464681-224585397	MB231_CTRL	MB231_W2	OK	44.9578	27.3993	-0.714435	-1.9509	0.00015	0.00134259	yes
ENSG00000037042.8	TUBG2	2.91115	2.98795	3.16625	7.39226	8.72839	8.58782	ENSG00000037042.8	TUBG2	chr17:42659304-42667006	MB231_CTRL	MB231_W2	OK	3.02178	8.23616	1.44657	3.90532	5e-05	0.000503098	yes
ENSG00000037241.7	RPL26L1	38.6948	41.0565	44.7884	56.3702	57.1019	60.7338	ENSG00000037241.7	RPL26L1	chr5:172954785-172969771	MB231_CTRL	MB231_W2	OK	41.5133	58.0686	0.484187	2.24517	5e-05	0.000503098	yes
ENSG00000037757.13	MRI1	6.80608	5.61082	6.64728	11.6187	16.8988	20.1391	ENSG00000037757.13	MRI1	chr19:13764531-13778462	MB231_CTRL	MB231_W2	OK	6.35473	16.2189	1.35177	1.85453	0.00265	0.0153386	yes
ENSG00000038219.12	BOD1L1	9.30827	12.1541	13.6506	12.5026	26.7743	14.4231	ENSG00000038219.12	BOD1L1	chr4:13568737-13627723	MB231_CTRL	MB231_W2	OK	11.7043	17.9	0.612921	1.60133	0.0066	0.0320046	yes
ENSG00000038382.17	TRIO	67.7211	64.5042	80.1749	93.6215	103.635	141.443	ENSG00000038382.17	TRIO	chr5:14143701-14532128	MB231_CTRL	MB231_W2	OK	70.8001	112.9	0.673221	1.52342	0.0072	0.0343723	yes
ENSG00000039650.10	PNKP	19.4498	22.7263	23.5369	67.7691	69.7976	76.1893	ENSG00000039650.10	PNKP	chr19:49818278-49888749	MB231_CTRL	MB231_W2	OK	21.9043	71.252	1.70171	2.72528	5e-05	0.000503098	yes
ENSG00000041880.14	PARP3	2.43706	3.18628	3.28548	3.79297	5.21686	4.84186	ENSG00000041880.14	PARP3	chr3:51942344-51948867	MB231_CTRL	MB231_W2	OK	2.96961	4.61723	0.636757	1.27533	0.00645	0.0314181	yes
ENSG00000041982.15	TNC	33.2021	36.9967	37.6855	11.3549	16.9109	16.3719	ENSG00000041982.15	TNC	chr9:115019577-115118257	MB231_CTRL	MB231_W2	OK	35.9614	14.8792	-1.27315	-2.61982	5e-05	0.000503098	yes
ENSG00000042286.14	AIFM2	19.4076	19.2743	20.0505	11.1065	14.1381	13.8974	ENSG00000042286.14	AIFM2	chr10:70052795-70132934	MB231_CTRL	MB231_W2	OK	19.5774	13.0473	-0.585436	-2.86574	5e-05	0.000503098	yes
ENSG00000042493.15	CAPG	168.04	194.709	174.069	104.856	118.154	114.646	ENSG00000042493.15	CAPG	chr2:85394747-85418432	MB231_CTRL	MB231_W2	OK	178.939	112.552	-0.668877	-3.09587	5e-05	0.000503098	yes
ENSG00000042980.12	ADAM28	1.2407	0.702172	1.49016	5.46332	4.89721	4.06527	ENSG00000042980.12	ADAM28	chr8:24294039-24912073	MB231_CTRL	MB231_W2	OK	1.14435	4.8086	2.07109	1.3694	0.0003	0.00245627	yes
ENSG00000044446.11	PHKA2	1.69864	2.87161	3.18631	6.99156	10.9975	11.2805	ENSG00000044446.11	PHKA2	chrX:18890295-18984598	MB231_CTRL	MB231_W2	OK	2.58552	9.75653	1.91591	2.28127	5e-05	0.000503098	yes
ENSG00000044574.7	HSPA5	205.519	231.047	224.377	89.8507	93.1806	96.0545	ENSG00000044574.7	HSPA5	chr9:125234852-125241330	MB231_CTRL	MB231_W2	OK	220.314	93.0286	-1.24382	-7.77379	5e-05	0.000503098	yes
ENSG00000046604.12	DSG2	28.8493	31.3778	33.6222	15.2047	16.1278	15.1691	ENSG00000046604.12	DSG2	chr18:31498042-31556911	MB231_CTRL	MB231_W2	OK	31.2831	15.5005	-1.01307	-6.31057	5e-05	0.000503098	yes
ENSG00000047056.14	WDR37	5.47263	4.60703	5.59063	5.89002	8.63772	8.83283	ENSG00000047056.14	WDR37	chr10:1049537-1132297	MB231_CTRL	MB231_W2	OK	5.22343	7.78686	0.576044	1.65135	0.0017	0.0106371	yes
ENSG00000047578.12	KIAA0556	2.82401	2.02019	1.38776	1.57573	8.74823	4.75618	ENSG00000047578.12	KIAA0556	chr16:27550132-27780369	MB231_CTRL	MB231_W2	OK	2.07732	5.02671	1.27489	1.035	0.01115	0.0485167	yes
ENSG00000047579.19	DTNBP1	15.8111	14.9568	12.6898	10.1006	8.91688	8.72615	ENSG00000047579.19	DTNBP1	chr6:15522800-15663058	MB231_CTRL	MB231_W2	OK	14.4859	9.24787	-0.64746	-2.33784	5e-05	0.000503098	yes
ENSG00000047634.14	SCML1	10.7142	10.3866	14.0174	17.3103	22.768	23.0749	ENSG00000047634.14	SCML1	chrX:17737448-17754988	MB231_CTRL	MB231_W2	OK	11.7061	21.0511	0.846635	3.60105	5e-05	0.000503098	yes
ENSG00000047644.18	WWC3	25.9942	29.2918	30.3618	14.5569	22.6107	15.1588	ENSG00000047644.18	WWC3	chrX:10015561-10144478	MB231_CTRL	MB231_W2	OK	28.5493	17.4422	-0.710876	-1.99001	0.00285	0.0162772	yes
ENSG00000047849.21	MAP4	61.5529	74.4221	69.5105	41.0698	49.3155	47.4142	ENSG00000047849.21	MAP4	chr3:47850689-48089272	MB231_CTRL	MB231_W2	OK	68.4952	45.9332	-0.576466	-2.92047	5e-05	0.000503098	yes
ENSG00000047932.13	GOPC	8.88849	9.26974	10.0603	7.40052	7.07428	6.86287	ENSG00000047932.13	GOPC	chr6:117288299-117602542	MB231_CTRL	MB231_W2	OK	9.40616	7.11256	-0.403238	-1.7999	0.00155	0.00984337	yes
ENSG00000048028.11	USP28	33.8975	40.7405	40.8201	21.6598	28.5324	21.098	ENSG00000048028.11	USP28	chr11:113797873-113875570	MB231_CTRL	MB231_W2	OK	38.486	23.7634	-0.695591	-2.04042	0.0006	0.00442867	yes
ENSG00000048140.17	TSPAN17	31.9997	28.7265	27.5877	17.7858	26.5297	23.4944	ENSG00000048140.17	TSPAN17	chr5:176647386-176659054	MB231_CTRL	MB231_W2	OK	29.438	22.6033	-0.381144	-1.53666	0.0068	0.032777	yes
ENSG00000048828.16	FAM120A	56.2781	62.1363	63.1834	41.6632	49.3662	47.6227	ENSG00000048828.16	FAM120A	chr9:93446493-93566107	MB231_CTRL	MB231_W2	OK	60.5326	46.2174	-0.389277	-1.72204	0.0029	0.0164807	yes
ENSG00000049130.13	KITLG	6.08211	5.70619	8.8823	4.54672	3.79991	2.95771	ENSG00000049130.13	KITLG	chr12:88492792-88598218	MB231_CTRL	MB231_W2	OK	6.8902	3.76812	-0.870702	-1.22047	0.0039	0.020982	yes
ENSG00000049449.8	RCN1	99.6471	107.578	108.903	84.1705	89.0447	90.9658	ENSG00000049449.8	RCN1	chr11:31784791-32105755	MB231_CTRL	MB231_W2	OK	105.376	88.0603	-0.258985	-1.48825	0.00745	0.0353208	yes
ENSG00000049541.10	RFC2	37.67	38.5826	36.7877	26.8828	30.6218	28.4015	ENSG00000049541.10	RFC2	chr7:74231498-74254458	MB231_CTRL	MB231_W2	OK	37.6801	28.6354	-0.396005	-1.7378	0.0032	0.0178059	yes
ENSG00000049656.13	CLPTM1L	85.785	96.3156	105.342	67.9098	68.1796	80.6378	ENSG00000049656.13	CLPTM1L	chr5:1317743-1345099	MB231_CTRL	MB231_W2	OK	95.8141	72.2424	-0.407392	-1.42088	0.0084	0.0388323	yes
ENSG00000049759.17	NEDD4L	87.8763	97.5918	77.5662	77.3964	55.6009	54.9423	ENSG00000049759.17	NEDD4L	chr18:58044366-58401540	MB231_CTRL	MB231_W2	OK	87.6781	62.6465	-0.484982	-1.64028	0.00145	0.00933362	yes
ENSG00000050130.17	JKAMP	41.2322	41.8649	39.944	61.6361	69.2004	57.1332	ENSG00000050130.17	JKAMP	chr14:59429021-59576831	MB231_CTRL	MB231_W2	OK	41.0137	62.6566	0.61136	2.28382	0.0001	0.000939965	yes
ENSG00000050344.8	NFE2L3	62.7732	71.4765	74.4815	43.8455	36.5065	34.1818	ENSG00000050344.8	NFE2L3	chr7:26152239-26187125	MB231_CTRL	MB231_W2	OK	69.5771	38.1779	-0.865873	-4.6289	5e-05	0.000503098	yes
ENSG00000050405.13	LIMA1	74.3339	82.1036	74.5519	56.5295	56.1893	54.5534	ENSG00000050405.13	LIMA1	chr12:50175787-50283546	MB231_CTRL	MB231_W2	OK	76.9964	55.7574	-0.465629	-1.44946	0.0112	0.0486671	yes
ENSG00000050426.15	LETMD1	9.2239	9.15991	8.3192	46.8242	42.5108	33.5873	ENSG00000050426.15	LETMD1	chr12:51047961-51060424	MB231_CTRL	MB231_W2	OK	8.901	40.9741	2.20267	3.9448	5e-05	0.000503098	yes
ENSG00000050438.16	SLC4A8	0.928511	0.299559	0.458766	1.64902	3.41067	1.32982	ENSG00000050438.16	SLC4A8	chr12:51351246-51515763	MB231_CTRL	MB231_W2	OK	0.562279	2.12984	1.92139	0.456004	0.0051	0.0261694	yes
ENSG00000051108.14	HERPUD1	21.1365	14.5065	23.3993	31.0182	34.645	24.3675	ENSG00000051108.14	HERPUD1	chr16:56932047-56944863	MB231_CTRL	MB231_W2	OK	19.6807	30.0103	0.608671	1.31877	0.0114	0.0492759	yes
ENSG00000051341.13	POLQ	2.40007	3.31758	2.62472	3.56743	6.07723	5.10222	ENSG00000051341.13	POLQ	chr3:121431426-121546641	MB231_CTRL	MB231_W2	OK	2.78079	4.91562	0.82188	1.86695	0.0014	0.00906419	yes
ENSG00000051523.10	CYBA	95.5758	102.262	90.22	106.696	120.099	125.733	ENSG00000051523.10	CYBA	chr16:88643282-88651152	MB231_CTRL	MB231_W2	OK	96.0193	117.509	0.291377	1.54955	0.00545	0.0275986	yes
ENSG00000051596.9	THOC3	23.0494	21.1896	18.9822	8.80674	14.4761	10.2593	ENSG00000051596.9	THOC3	chr5:175906938-176034680	MB231_CTRL	MB231_W2	OK	21.0737	11.1807	-0.914433	-2.43715	5e-05	0.000503098	yes
ENSG00000052126.14	PLEKHA5	10.2895	11.9772	12.7843	17.2065	17.8088	21.7599	ENSG00000052126.14	PLEKHA5	chr12:19129751-19376400	MB231_CTRL	MB231_W2	OK	11.6837	18.9251	0.695803	2.35561	0.0001	0.000939965	yes
ENSG00000052841.14	TTC17	12.4923	15.0292	14.4587	22.4439	21.8267	25.8067	ENSG00000052841.14	TTC17	chr11:43311962-43494933	MB231_CTRL	MB231_W2	OK	13.9934	23.3591	0.739241	1.50233	0.0029	0.0164807	yes
ENSG00000053254.15	FOXN3	26.0774	28.7457	26.1333	16.1927	15.7954	18.3535	ENSG00000053254.15	FOXN3	chr14:89124870-89954777	MB231_CTRL	MB231_W2	OK	26.9855	16.7806	-0.685393	-1.53223	0.00095	0.00654723	yes
ENSG00000053371.12	AKR7A2	35.3513	38.0194	33.1075	24.2429	28.3394	31.1509	ENSG00000053371.12	AKR7A2	chr1:19303964-19312146	MB231_CTRL	MB231_W2	OK	35.4927	27.9111	-0.346687	-1.6848	0.00255	0.014853	yes
ENSG00000053501.12	USE1	8.09135	12.4539	9.4085	5.93237	7.97818	5.61491	ENSG00000053501.12	USE1	chr19:17215345-17219829	MB231_CTRL	MB231_W2	OK	9.98459	6.50848	-0.617382	-1.45149	0.00605	0.0299125	yes
ENSG00000053747.15	LAMA3	3.87518	3.5082	4.51661	7.52521	11.2751	11.5954	ENSG00000053747.15	LAMA3	chr18:23689442-23955066	MB231_CTRL	MB231_W2	OK	3.96666	10.1319	1.35291	1.8457	5e-05	0.000503098	yes
ENSG00000054118.13	THRAP3	52.3363	52.5198	59.926	32.5194	29.3017	28.185	ENSG00000054118.13	THRAP3	chr1:36224415-36305357	MB231_CTRL	MB231_W2	OK	54.9274	30.002	-0.872466	-3.21988	5e-05	0.000503098	yes
ENSG00000054148.17	PHPT1	58.5484	57.0533	56.0231	58.7453	81.4112	74.1861	ENSG00000054148.17	PHPT1	chr9:136844414-136860799	MB231_CTRL	MB231_W2	OK	57.2083	71.4476	0.320661	1.51941	0.0091	0.0413014	yes
ENSG00000054523.17	KIF1B	10.5817	12.7199	12.8251	8.94652	7.53065	6.65638	ENSG00000054523.17	KIF1B	chr1:10210804-10381603	MB231_CTRL	MB231_W2	OK	12.0422	7.71118	-0.643075	-1.7029	0.0064	0.031255	yes
ENSG00000054598.6	FOXC1	9.84183	11.4083	11.6571	5.73488	9.01475	7.61622	ENSG00000054598.6	FOXC1	chr6:1609971-1613897	MB231_CTRL	MB231_W2	OK	10.9691	7.45528	-0.557107	-2.55465	5e-05	0.000503098	yes
ENSG00000054611.13	TBC1D22A	7.06124	7.54859	7.25752	4.40022	5.31445	4.49296	ENSG00000054611.13	TBC1D22A	chr22:46762616-47175699	MB231_CTRL	MB231_W2	OK	7.28912	4.73587	-0.622113	-1.4543	0.0011	0.00740172	yes
ENSG00000054690.13	PLEKHH1	2.42137	0.853322	1.82991	8.17145	5.01455	8.80416	ENSG00000054690.13	PLEKHH1	chr14:67447083-67600287	MB231_CTRL	MB231_W2	OK	1.70153	7.33005	2.10699	1.35004	5e-05	0.000503098	yes
ENSG00000054967.12	RELT	4.72103	5.5765	5.8767	9.61712	13.1225	9.72301	ENSG00000054967.12	RELT	chr11:73376263-73397474	MB231_CTRL	MB231_W2	OK	5.39141	10.8209	1.00508	3.4166	5e-05	0.000503098	yes
ENSG00000055070.16	SZRD1	58.1672	62.217	65.8477	38.4263	42.8014	49.1226	ENSG00000055070.16	SZRD1	chr1:16352574-16437424	MB231_CTRL	MB231_W2	OK	62.0773	43.4501	-0.514707	-2.84864	5e-05	0.000503098	yes
ENSG00000055130.15	CUL1	22.1966	25.2986	25.6072	15.9765	16.8502	15.9473	ENSG00000055130.15	CUL1	chr7:148696466-148801036	MB231_CTRL	MB231_W2	OK	24.3675	16.258	-0.583808	-3.4908	5e-05	0.000503098	yes
ENSG00000055208.18	TAB2	24.8463	24.1004	27.6578	20.5937	22.6157	20.1003	ENSG00000055208.18	TAB2	chr6:149217925-149411613	MB231_CTRL	MB231_W2	OK	25.5348	21.1032	-0.275004	-1.41494	0.00915	0.0414985	yes
ENSG00000055732.12	MCOLN3	1.84455	2.44523	2.27012	4.23757	5.82857	7.18258	ENSG00000055732.12	MCOLN3	chr1:84999146-85133138	MB231_CTRL	MB231_W2	OK	2.18664	5.74957	1.39474	3.48404	5e-05	0.000503098	yes
ENSG00000056050.6	HPF1	13.9088	12.111	13.223	11.5421	7.49516	8.59277	ENSG00000056050.6	HPF1	chr4:169729464-169757953	MB231_CTRL	MB231_W2	OK	13.0809	9.21001	-0.50619	-1.43888	0.009	0.0409606	yes
ENSG00000056097.15	ZFR	79.2003	70.7795	66.2696	40.2025	47.5085	38.997	ENSG00000056097.15	ZFR	chr5:32354349-32444761	MB231_CTRL	MB231_W2	OK	72.0831	42.236	-0.771187	-2.60387	5e-05	0.000503098	yes
ENSG00000056558.10	TRAF1	6.53987	8.18402	7.62841	3.93651	6.12776	5.71008	ENSG00000056558.10	TRAF1	chr9:120902392-120929173	MB231_CTRL	MB231_W2	OK	7.45077	5.25812	-0.502843	-2.27515	0.0003	0.00245627	yes
ENSG00000057019.15	DCBLD2	130.883	158.08	137.302	103.794	112.891	111.008	ENSG00000057019.15	DCBLD2	chr3:98714329-98901689	MB231_CTRL	MB231_W2	OK	142.088	109.231	-0.379401	-1.55638	0.00535	0.0271868	yes
ENSG00000057252.12	SOAT1	44.2952	46.9156	49.4098	29.8446	33.1329	30.5266	ENSG00000057252.12	SOAT1	chr1:179293713-179358680	MB231_CTRL	MB231_W2	OK	46.8736	31.168	-0.588707	-3.62305	5e-05	0.000503098	yes
ENSG00000057608.16	GDI2	199.546	214.625	220.054	146.912	147.321	147.322	ENSG00000057608.16	GDI2	chr10:5765222-5842132	MB231_CTRL	MB231_W2	OK	211.408	147.185	-0.522398	-3.20633	5e-05	0.000503098	yes
ENSG00000057663.13	ATG5	13.7533	14.0048	14.6711	20.4854	23.967	25.6749	ENSG00000057663.13	ATG5	chr6:106045422-106325820	MB231_CTRL	MB231_W2	OK	14.1431	23.3758	0.72492	2.90666	5e-05	0.000503098	yes
ENSG00000057704.11	TMCC3	10.2815	12.7995	13.5613	7.24482	5.66317	7.98287	ENSG00000057704.11	TMCC3	chr12:94567123-94650562	MB231_CTRL	MB231_W2	OK	12.2141	6.96362	-0.81064	-1.34341	0.00555	0.0279814	yes
ENSG00000058063.15	ATP11B	27.3466	30.1733	25.9151	16.1066	16.3143	23.2726	ENSG00000058063.15	ATP11B	chr3:182793499-182921938	MB231_CTRL	MB231_W2	OK	27.8117	18.5645	-0.583142	-1.69362	0.0023	0.0136382	yes
ENSG00000058085.14	LAMC2	17.646	20.4494	22.3774	9.87101	12.0125	11.8392	ENSG00000058085.14	LAMC2	chr1:183186237-183244900	MB231_CTRL	MB231_W2	OK	20.1576	11.2409	-0.842566	-3.25525	5e-05	0.000503098	yes
ENSG00000058262.9	SEC61A1	71.1	78.1292	77.4493	40.129	62.0197	45.064	ENSG00000058262.9	SEC61A1	chr3:128051640-128408646	MB231_CTRL	MB231_W2	OK	75.5595	49.0709	-0.622746	-2.37267	5e-05	0.000503098	yes
ENSG00000058335.15	RASGRF1	1.20483	1.1948	0.834206	2.22085	6.32832	2.03862	ENSG00000058335.15	RASGRF1	chr15:78959946-79090773	MB231_CTRL	MB231_W2	OK	1.07795	3.52926	1.71108	1.05709	0.0005	0.00379645	yes
ENSG00000058453.16	CROCC	2.63395	2.21038	1.23481	9.49686	5.60569	7.2587	ENSG00000058453.16	CROCC	chr1:16739937-16972979	MB231_CTRL	MB231_W2	OK	2.02638	7.45375	1.87906	2.11057	5e-05	0.000503098	yes
ENSG00000058668.14	ATP2B4	16.8794	19.236	20.1128	8.96306	8.54952	11.8487	ENSG00000058668.14	ATP2B4	chr1:203626560-203744081	MB231_CTRL	MB231_W2	OK	18.7428	9.78711	-0.937379	-3.22773	5e-05	0.000503098	yes
ENSG00000059573.8	ALDH18A1	29.9867	36.8496	34.3091	22.5855	21.6648	22.3811	ENSG00000059573.8	ALDH18A1	chr10:95605928-95656706	MB231_CTRL	MB231_W2	OK	33.7151	22.2105	-0.602154	-2.24789	0.00015	0.00134259	yes
ENSG00000059588.9	TARBP1	3.28228	4.39624	4.04917	13.7404	15.5423	17.5123	ENSG00000059588.9	TARBP1	chr1:234391312-234479103	MB231_CTRL	MB231_W2	OK	3.90923	15.5983	1.99643	3.40333	5e-05	0.000503098	yes
ENSG00000060558.3	GNA15	20.9988	21.7942	19.9738	14.801	15.7833	15.8423	ENSG00000060558.3	GNA15	chr19:3136192-3163769	MB231_CTRL	MB231_W2	OK	20.9223	15.4755	-0.435051	-2.00796	0.0003	0.00245627	yes
ENSG00000060971.17	ACAA1	13.371	14.826	12.6475	19.3063	21.5905	13.0198	ENSG00000060971.17	ACAA1	chr3:38039204-38137242	MB231_CTRL	MB231_W2	OK	13.6148	17.9722	0.400587	1.32731	0.01015	0.0450195	yes
ENSG00000061273.17	HDAC7	20.2018	16.2227	25.0981	24.3003	49.9235	36.2108	ENSG00000061273.17	HDAC7	chr12:47706084-47837898	MB231_CTRL	MB231_W2	OK	20.5075	36.8115	0.844005	1.57495	0.0027	0.0155661	yes
ENSG00000061656.9	SPAG4	3.96301	6.67136	2.53267	15.8924	23.2994	5.06138	ENSG00000061656.9	SPAG4	chr20:35615891-35621049	MB231_CTRL	MB231_W2	OK	4.38902	14.7511	1.74885	2.47549	5e-05	0.000503098	yes
ENSG00000061676.14	NCKAP1	60.6385	64.303	67.8641	33.2955	35.3968	35.5653	ENSG00000061676.14	NCKAP1	chr2:182909114-183038858	MB231_CTRL	MB231_W2	OK	64.2685	34.7525	-0.886994	-3.72879	5e-05	0.000503098	yes
ENSG00000061987.14	MON2	5.19512	6.07425	4.73486	11.6239	7.42707	10.6818	ENSG00000061987.14	MON2	chr12:62466816-62600479	MB231_CTRL	MB231_W2	OK	5.33474	9.91095	0.893604	1.44029	0.0032	0.0178059	yes
ENSG00000062370.16	ZNF112	0.842381	0.882883	0.883957	1.95611	1.63455	2.58736	ENSG00000062370.16	ZNF112	chr19:44326554-44448578	MB231_CTRL	MB231_W2	OK	0.86974	2.05934	1.24352	1.42119	0.0005	0.00379645	yes
ENSG00000062650.17	WAPL	23.3613	29.4881	30.1015	17.7817	21.0415	19.2422	ENSG00000062650.17	WAPL	chr10:86435255-86521815	MB231_CTRL	MB231_W2	OK	27.6503	19.3551	-0.514579	-2.12238	0.00105	0.00712483	yes
ENSG00000062716.11	VMP1	65.3526	61.9812	65.5599	162.834	180.879	139.386	ENSG00000062716.11	VMP1	chr17:59618552-59842255	MB231_CTRL	MB231_W2	OK	64.2979	161.033	1.32451	2.08816	0.0016	0.0101235	yes
ENSG00000062822.12	POLD1	19.0059	21.58	17.4818	30.161	26.1334	28.9669	ENSG00000062822.12	POLD1	chr19:50384203-50431313	MB231_CTRL	MB231_W2	OK	19.3559	28.4204	0.554157	1.88954	0.0006	0.00442867	yes
ENSG00000063241.7	ISOC2	35.9114	50.6068	38.8363	49.1716	60.9289	58.1206	ENSG00000063241.7	ISOC2	chr19:55452984-55462343	MB231_CTRL	MB231_W2	OK	41.7848	56.0737	0.424345	1.82685	0.0014	0.00906419	yes
ENSG00000063245.14	EPN1	110.008	117.235	122.4	61.7597	76.1257	89.1517	ENSG00000063245.14	EPN1	chr19:55675225-55738402	MB231_CTRL	MB231_W2	OK	116.547	75.6791	-0.62295	-2.71253	5e-05	0.000503098	yes
ENSG00000063587.13	ZNF275	1.47783	1.71662	2.04494	1.96145	3.15668	3.16227	ENSG00000063587.13	ZNF275	chrX:153334154-153360110	MB231_CTRL	MB231_W2	OK	1.74646	2.76013	0.660302	1.58007	0.00285	0.0162772	yes
ENSG00000063660.8	GPC1	15.6416	12.6876	14.8914	8.0047	9.42141	9.6414	ENSG00000063660.8	GPC1	chr2:240435670-240468078	MB231_CTRL	MB231_W2	OK	14.4069	9.0225	-0.675157	-2.15133	0.0002	0.00172918	yes
ENSG00000064225.12	ST3GAL6	2.90421	1.98703	3.43176	10.6644	9.62748	4.32107	ENSG00000064225.12	ST3GAL6	chr3:98714329-98901689	MB231_CTRL	MB231_W2	OK	2.77433	8.20433	1.56425	0.695039	0.0035	0.0192041	yes
ENSG00000064393.15	HIPK2	40.9907	46.0901	41.1211	30.5152	31.4195	33.2743	ENSG00000064393.15	HIPK2	chr7:139561569-140020325	MB231_CTRL	MB231_W2	OK	42.734	31.7363	-0.429248	-2.03386	0.0004	0.00314441	yes
ENSG00000064419.13	TNPO3	28.7407	32.7635	31.7186	18.24	19.6762	21.6637	ENSG00000064419.13	TNPO3	chr7:128954179-129055173	MB231_CTRL	MB231_W2	OK	31.0742	19.86	-0.645857	-4.04524	5e-05	0.000503098	yes
ENSG00000064607.16	SUGP2	26.6489	30.8688	29.1719	78.5409	80.0743	93.1599	ENSG00000064607.16	SUGP2	chr19:18990887-19060311	MB231_CTRL	MB231_W2	OK	28.8965	83.925	1.5382	4.33021	5e-05	0.000503098	yes
ENSG00000064666.14	CNN2	149.728	158.494	148.433	110.186	124.706	131.578	ENSG00000064666.14	CNN2	chr19:1026580-1039068	MB231_CTRL	MB231_W2	OK	152.219	122.157	-0.317412	-1.72459	0.0029	0.0164807	yes
ENSG00000064687.12	ABCA7	3.13362	5.09542	2.57064	12.372	7.31643	22.3251	ENSG00000064687.12	ABCA7	chr19:1040100-1065572	MB231_CTRL	MB231_W2	OK	3.59989	14.0045	1.95987	1.90853	5e-05	0.000503098	yes
ENSG00000064995.16	TAF11	11.5176	11.5685	14.261	16.0961	17.9914	19.9327	ENSG00000064995.16	TAF11	chr6:34792014-34888089	MB231_CTRL	MB231_W2	OK	12.449	18.0068	0.532503	1.83805	0.0026	0.0150954	yes
ENSG00000064999.13	ANKS1A	6.01183	7.62165	6.39985	4.95168	4.23078	5.07027	ENSG00000064999.13	ANKS1A	chr6:34889264-35091413	MB231_CTRL	MB231_W2	OK	6.67777	4.75091	-0.491163	-1.96393	0.00165	0.0103809	yes
ENSG00000065029.14	ZNF76	14.9043	13.2157	11.0916	23.9844	26.6401	31.2244	ENSG00000065029.14	ZNF76	chr6:35258908-35295985	MB231_CTRL	MB231_W2	OK	13.0705	27.283	1.06168	3.66024	5e-05	0.000503098	yes
ENSG00000065054.13	SLC9A3R2	102.43	104.848	113.686	61.7367	77.5544	80.2697	ENSG00000065054.13	SLC9A3R2	chr16:2025355-2039026	MB231_CTRL	MB231_W2	OK	106.988	73.1869	-0.547792	-2.94859	5e-05	0.000503098	yes
ENSG00000065154.11	OAT	87.5998	90.828	90.2303	66.9968	58.133	50.7385	ENSG00000065154.11	OAT	chr10:124397302-124418976	MB231_CTRL	MB231_W2	OK	89.5527	58.6228	-0.611276	-3.32096	5e-05	0.000503098	yes
ENSG00000065183.15	WDR3	16.7811	19.3373	18.1498	8.64681	11.5751	12.1042	ENSG00000065183.15	WDR3	chr1:117929719-118185223	MB231_CTRL	MB231_W2	OK	18.0894	10.7754	-0.747409	-1.63798	0.0067	0.032394	yes
ENSG00000065308.4	TRAM2	80.8103	89.2751	91.2461	51.9734	58.5602	56.3428	ENSG00000065308.4	TRAM2	chr6:52361420-52576915	MB231_CTRL	MB231_W2	OK	87.1105	55.6255	-0.647101	-3.88995	5e-05	0.000503098	yes
ENSG00000065357.19	DGKA	5.31421	4.45255	4.28926	10.8985	7.60013	11.9791	ENSG00000065357.19	DGKA	chr12:55901412-55954027	MB231_CTRL	MB231_W2	OK	4.68534	10.1593	1.11657	1.00321	0.0002	0.00172918	yes
ENSG00000065361.14	ERBB3	0.272171	1.03871	1.08287	3.23301	3.17291	4.05724	ENSG00000065361.14	ERBB3	chr12:56079856-56113907	MB231_CTRL	MB231_W2	OK	0.797916	3.48772	2.12797	0.533073	0.0003	0.00245627	yes
ENSG00000065491.8	TBC1D22B	10.3795	11.6592	11.6946	7.99788	7.54926	9.1955	ENSG00000065491.8	TBC1D22B	chr6:37212179-37332970	MB231_CTRL	MB231_W2	OK	11.2445	8.24754	-0.447179	-2.14466	0.00015	0.00134259	yes
ENSG00000065518.7	NDUFB4	45.5652	46.6788	47.448	57.3977	71.8425	65.1752	ENSG00000065518.7	NDUFB4	chr3:120596308-120602500	MB231_CTRL	MB231_W2	OK	46.564	64.8051	0.476893	2.0408	0.00025	0.00209262	yes
ENSG00000065548.17	ZC3H15	36.0864	44.3823	45.9626	29.0175	37.8951	27.7119	ENSG00000065548.17	ZC3H15	chr2:186486155-186509363	MB231_CTRL	MB231_W2	OK	42.1438	31.5415	-0.418068	-1.48774	0.009	0.0409606	yes
ENSG00000065613.13	SLK	19.8837	23.2094	24.3662	14.4127	13.9955	14.6546	ENSG00000065613.13	SLK	chr10:103967200-104029233	MB231_CTRL	MB231_W2	OK	22.4864	14.3543	-0.647576	-3.76176	5e-05	0.000503098	yes
ENSG00000065665.20	SEC61A2	2.83458	3.70683	4.0385	7.82624	6.96852	9.98758	ENSG00000065665.20	SEC61A2	chr10:12129636-12250589	MB231_CTRL	MB231_W2	OK	3.52664	8.26078	1.22799	0.952881	0.01005	0.0446965	yes
ENSG00000065833.8	ME1	12.6755	14.8472	13.6114	10.0393	7.51724	9.52199	ENSG00000065833.8	ME1	chr6:83210388-83431071	MB231_CTRL	MB231_W2	OK	13.7114	9.02616	-0.603189	-3.07417	5e-05	0.000503098	yes
ENSG00000065923.9	SLC9A7	31.4119	31.5744	33.977	19.6059	21.1747	14.0785	ENSG00000065923.9	SLC9A7	chrX:46599251-46759172	MB231_CTRL	MB231_W2	OK	32.3211	18.2864	-0.821705	-2.45722	0.0001	0.000939965	yes
ENSG00000065970.8	FOXJ2	7.7126	7.60305	8.33478	4.47752	6.62111	7.00157	ENSG00000065970.8	FOXJ2	chr12:8032702-8055503	MB231_CTRL	MB231_W2	OK	7.88348	6.0334	-0.385861	-1.8024	0.00195	0.0118792	yes
ENSG00000065978.18	YBX1	326.299	354.608	353.258	192.954	208.422	202.729	ENSG00000065978.18	YBX1	chr1:42682426-42702349	MB231_CTRL	MB231_W2	OK	344.722	201.368	-0.775597	-4.49153	5e-05	0.000503098	yes
ENSG00000066027.11	PPP2R5A	7.48313	8.44521	8.0977	3.8761	6.11997	5.17577	ENSG00000066027.11	PPP2R5A	chr1:212285536-212361863	MB231_CTRL	MB231_W2	OK	8.00868	5.05728	-0.663202	-2.05948	0.0001	0.000939965	yes
ENSG00000066044.14	ELAVL1	71.1796	71.1118	72.6604	44.3526	49.4998	47.9853	ENSG00000066044.14	ELAVL1	chr19:7958578-8005659	MB231_CTRL	MB231_W2	OK	71.6506	47.2792	-0.599771	-3.1809	5e-05	0.000503098	yes
ENSG00000066084.12	DIP2B	8.58456	8.66368	8.54556	7.87384	6.44757	4.82736	ENSG00000066084.12	DIP2B	chr12:50504984-50748667	MB231_CTRL	MB231_W2	OK	8.59793	6.38292	-0.429773	-1.51316	0.00565	0.0283572	yes
ENSG00000066136.20	NFYC	27.5017	28.7159	26.7909	16.1674	22.1887	21.3821	ENSG00000066136.20	NFYC	chr1:40690379-40771603	MB231_CTRL	MB231_W2	OK	27.6695	19.9127	-0.474606	-1.58929	0.0021	0.0126444	yes
ENSG00000066322.13	ELOVL1	69.0527	79.9645	79.7887	51.9556	69.5998	42.7189	ENSG00000066322.13	ELOVL1	chr1:43363396-43368074	MB231_CTRL	MB231_W2	OK	76.2686	54.7581	-0.478017	-2.20308	0.0001	0.000939965	yes
ENSG00000066651.17	TRMT11	3.8761	3.56923	5.53721	9.33798	10.1677	9.60636	ENSG00000066651.17	TRMT11	chr6:125986429-126039276	MB231_CTRL	MB231_W2	OK	4.32752	9.70402	1.16504	1.2413	0.0037	0.0200658	yes
ENSG00000067177.14	PHKA1	4.32078	4.73793	5.06109	2.49331	3.32151	2.77686	ENSG00000067177.14	PHKA1	chrX:72578813-72714319	MB231_CTRL	MB231_W2	OK	4.7066	2.86389	-0.716708	-2.93208	5e-05	0.000503098	yes
ENSG00000067191.15	CACNB1	1.65048	3.32383	1.12704	7.5943	10.6468	8.37927	ENSG00000067191.15	CACNB1	chr17:39173289-39197703	MB231_CTRL	MB231_W2	OK	2.03378	8.87346	2.12533	2.24066	5e-05	0.000503098	yes
ENSG00000067225.17	PKM	1076.24	1194.33	1150.19	710.359	803.425	764.235	ENSG00000067225.17	PKM	chr15:72199028-72231822	MB231_CTRL	MB231_W2	OK	1140.26	759.339	-0.586541	-2.91028	5e-05	0.000503098	yes
ENSG00000067248.9	DHX29	16.0239	19.1634	18.0725	11.7535	14.6159	10.104	ENSG00000067248.9	DHX29	chr5:55233933-55307722	MB231_CTRL	MB231_W2	OK	17.7533	12.1578	-0.546199	-2.12541	0.00075	0.00534003	yes
ENSG00000067365.14	METTL22	4.47234	3.07409	4.10227	12.4053	13.6766	9.14853	ENSG00000067365.14	METTL22	chr16:8621682-8649654	MB231_CTRL	MB231_W2	OK	3.8829	11.7435	1.59665	1.56738	5e-05	0.000503098	yes
ENSG00000067560.10	RHOA	324.697	344.424	339.108	258.783	300.244	279.754	ENSG00000067560.10	RHOA	chr3:49359144-49416475	MB231_CTRL	MB231_W2	OK	336.076	279.594	-0.265455	-1.57629	0.0063	0.0308862	yes
ENSG00000067704.9	IARS2	37.1781	43.4527	40.574	25.201	25.9487	24.4301	ENSG00000067704.9	IARS2	chr1:220094101-220148041	MB231_CTRL	MB231_W2	OK	40.4016	25.1932	-0.681376	-3.87101	5e-05	0.000503098	yes
ENSG00000068028.17	RASSF1	15.9903	16.4831	17.6442	21.7876	23.4207	25.2313	ENSG00000068028.17	RASSF1	chr3:50329781-50340980	MB231_CTRL	MB231_W2	OK	16.7059	23.4798	0.491068	2.28139	5e-05	0.000503098	yes
ENSG00000068079.7	IFI35	9.97828	14.3224	9.94341	7.02349	5.29697	5.25495	ENSG00000068079.7	IFI35	chr17:43006724-43014456	MB231_CTRL	MB231_W2	OK	11.4147	5.85847	-0.962296	-1.59024	0.0005	0.00379645	yes
ENSG00000068308.13	OTUD5	19.2998	21.8546	20.0434	14.8385	18.2643	15.4639	ENSG00000068308.13	OTUD5	chrX:48922027-48958386	MB231_CTRL	MB231_W2	OK	20.3993	16.1889	-0.333512	-1.63931	0.0031	0.0173617	yes
ENSG00000068394.10	GPKOW	10.7014	11.1109	10.5074	5.19424	7.06935	8.15722	ENSG00000068394.10	GPKOW	chrX:49113388-49123801	MB231_CTRL	MB231_W2	OK	10.7732	6.80694	-0.662374	-3.10584	5e-05	0.000503098	yes
ENSG00000068400.13	GRIPAP1	10.1811	10.7972	10.9711	20.3791	15.2011	21.8604	ENSG00000068400.13	GRIPAP1	chrX:48973719-49002264	MB231_CTRL	MB231_W2	OK	10.6498	19.1469	0.846283	1.94683	0.00035	0.00280437	yes
ENSG00000068697.6	LAPTM4A	123.714	119.184	120.568	74.8048	105.021	77.5287	ENSG00000068697.6	LAPTM4A	chr2:20032649-20052028	MB231_CTRL	MB231_W2	OK	121.155	85.7849	-0.498058	-2.96155	5e-05	0.000503098	yes
ENSG00000068745.14	IP6K2	19.6893	24.4337	20.173	40.2894	44.5064	51.949	ENSG00000068745.14	IP6K2	chr3:48688002-48740353	MB231_CTRL	MB231_W2	OK	21.432	45.5816	1.08869	4.2319	5e-05	0.000503098	yes
ENSG00000069011.15	PITX1	70.0496	67.5359	67.6288	40.9159	52.0275	45.726	ENSG00000069011.15	PITX1	chr5:135027734-135401296	MB231_CTRL	MB231_W2	OK	68.4048	46.2231	-0.565482	-1.50001	0.00945	0.0426495	yes
ENSG00000069122.18	ADGRF5	73.9003	86.7303	83.7581	45.4458	45.6633	46.8089	ENSG00000069122.18	ADGRF5	chr6:46852511-46954943	MB231_CTRL	MB231_W2	OK	81.4629	45.9727	-0.825367	-4.70746	5e-05	0.000503098	yes
ENSG00000069275.12	NUCKS1	159.837	196.505	198.457	112.595	107.558	121.007	ENSG00000069275.12	NUCKS1	chr1:205712818-205750276	MB231_CTRL	MB231_W2	OK	184.933	113.72	-0.701512	-1.48307	5e-05	0.000503098	yes
ENSG00000069329.15	VPS35	45.6936	51.8837	59.4917	31.9719	35.1033	32.5218	ENSG00000069329.15	VPS35	chr16:46656131-46689518	MB231_CTRL	MB231_W2	OK	52.3563	33.199	-0.657224	-2.51196	5e-05	0.000503098	yes
ENSG00000069345.11	DNAJA2	32.7858	35.4764	39.4433	29.9135	33.6628	24.9403	ENSG00000069345.11	DNAJA2	chr16:46955361-46973788	MB231_CTRL	MB231_W2	OK	35.9018	29.5056	-0.28307	-1.61243	0.0058	0.0289678	yes
ENSG00000069702.10	TGFBR3	9.11891	9.78022	10.599	3.20247	9.26418	3.31784	ENSG00000069702.10	TGFBR3	chr1:91680342-91906335	MB231_CTRL	MB231_W2	OK	9.83272	5.26149	-0.902118	-1.83044	0.0041	0.0218807	yes
ENSG00000069869.15	NEDD4	12.6966	12.7989	14.0621	10.0182	9.23345	8.95701	ENSG00000069869.15	NEDD4	chr15:55826921-55993746	MB231_CTRL	MB231_W2	OK	13.1858	9.40289	-0.487814	-1.67311	0.00195	0.0118792	yes
ENSG00000069966.18	GNB5	28.476	30.6487	30.7355	21.2673	20.0719	21.6473	ENSG00000069966.18	GNB5	chr15:52115104-52295798	MB231_CTRL	MB231_W2	OK	29.9534	20.9955	-0.51264	-2.0368	0.0004	0.00314441	yes
ENSG00000070214.15	SLC44A1	12.8833	14.575	15.9081	10.4241	10.132	9.36564	ENSG00000070214.15	SLC44A1	chr9:105244621-105439171	MB231_CTRL	MB231_W2	OK	14.4555	9.97391	-0.535386	-1.6399	0.0011	0.00740172	yes
ENSG00000070371.15	CLTCL1	1.39399	2.07061	1.87586	5.12313	2.24627	6.01576	ENSG00000070371.15	CLTCL1	chr22:19179472-19291716	MB231_CTRL	MB231_W2	OK	1.78016	4.46172	1.3256	1.37903	0.0021	0.0126444	yes
ENSG00000070413.19	DGCR2	20.0336	22.1363	18.8471	7.82509	12.1196	10.5602	ENSG00000070413.19	DGCR2	chr22:19036281-19128449	MB231_CTRL	MB231_W2	OK	20.339	10.1683	-1.00017	-3.88319	5e-05	0.000503098	yes
ENSG00000070476.14	ZXDC	4.71426	7.17202	6.39956	6.02392	10.7269	11.4342	ENSG00000070476.14	ZXDC	chr3:126437600-126475919	MB231_CTRL	MB231_W2	OK	6.09528	9.39498	0.624197	2.39245	5e-05	0.000503098	yes
ENSG00000070501.11	POLB	9.16554	16.3031	10.7206	17.6222	18.5949	22.2229	ENSG00000070501.11	POLB	chr8:42338453-42371808	MB231_CTRL	MB231_W2	OK	12.0631	19.48	0.691399	1.62917	0.00235	0.0138868	yes
ENSG00000070610.14	GBA2	9.79858	9.71243	8.15733	33.2569	32.3683	28.4333	ENSG00000070610.14	GBA2	chr9:35696947-35749228	MB231_CTRL	MB231_W2	OK	9.22278	31.3529	1.76532	1.67082	0.00035	0.00280437	yes
ENSG00000070669.16	ASNS	11.7343	9.44178	10.2363	14.5038	21.0843	19.6924	ENSG00000070669.16	ASNS	chr7:97852117-97872542	MB231_CTRL	MB231_W2	OK	10.4708	18.4268	0.815437	1.94613	0.0001	0.000939965	yes
ENSG00000070785.16	EIF2B3	23.2124	28.2341	28.7389	21.2005	10.4462	15.1422	ENSG00000070785.16	EIF2B3	chr1:44850521-44986722	MB231_CTRL	MB231_W2	OK	26.7285	15.5963	-0.777175	-1.94897	0.00115	0.00769031	yes
ENSG00000070831.15	CDC42	126.736	134.156	138.9	92.7856	100.859	91.1231	ENSG00000070831.15	CDC42	chr1:22052626-22092946	MB231_CTRL	MB231_W2	OK	133.264	94.9227	-0.48946	-2.93057	5e-05	0.000503098	yes
ENSG00000070961.15	ATP2B1	59.7533	67.2364	64.3673	42.7802	35.1965	41.7981	ENSG00000070961.15	ATP2B1	chr12:89561128-89712590	MB231_CTRL	MB231_W2	OK	63.7857	39.9249	-0.675943	-1.73394	0.00325	0.018039	yes
ENSG00000071051.13	NCK2	28.7325	29.4881	27.5839	13.8908	15.6644	14.891	ENSG00000071051.13	NCK2	chr2:105744896-105894274	MB231_CTRL	MB231_W2	OK	28.6015	14.8154	-0.948995	-4.32591	5e-05	0.000503098	yes
ENSG00000071127.16	WDR1	697.923	857.881	792.463	462.321	432.337	479.407	ENSG00000071127.16	WDR1	chr4:10074338-10116949	MB231_CTRL	MB231_W2	OK	782.756	458.022	-0.773146	-1.93292	0.00085	0.00593698	yes
ENSG00000071243.15	ING3	7.37668	6.79265	9.33704	10.6602	10.8258	10.9645	ENSG00000071243.15	ING3	chr7:120950748-120977216	MB231_CTRL	MB231_W2	OK	7.83546	10.8168	0.46519	1.57312	0.00615	0.0303356	yes
ENSG00000071553.16	ATP6AP1	31.6727	31.8202	31.8314	21.8333	25.4228	28.1972	ENSG00000071553.16	ATP6AP1	chrX:154428631-154436516	MB231_CTRL	MB231_W2	OK	31.7747	25.1511	-0.33726	-1.46919	0.00755	0.0357277	yes
ENSG00000071564.14	TCF3	69.0816	70.5653	63.7806	39.7935	58.9973	46.3944	ENSG00000071564.14	TCF3	chr19:1609289-1652605	MB231_CTRL	MB231_W2	OK	67.8092	48.3951	-0.486621	-1.86996	0.0015	0.00960482	yes
ENSG00000071859.14	FAM50A	12.1811	13.634	15.0199	20.4008	18.6641	25.8981	ENSG00000071859.14	FAM50A	chrX:154444125-154450654	MB231_CTRL	MB231_W2	OK	13.6117	21.6543	0.669808	1.57339	0.009	0.0409606	yes
ENSG00000071894.15	CPSF1	21.356	22.3147	21.7716	49.0428	64.4617	72.4655	ENSG00000071894.15	CPSF1	chr8:144373100-144409349	MB231_CTRL	MB231_W2	OK	21.8141	61.99	1.50678	3.41343	5e-05	0.000503098	yes
ENSG00000072062.13	PRKACA	61.484	65.0118	59.8316	42.793	46.0295	42.7052	ENSG00000072062.13	PRKACA	chr19:14091687-14118084	MB231_CTRL	MB231_W2	OK	62.1091	43.8426	-0.502474	-2.61186	5e-05	0.000503098	yes
ENSG00000072110.13	ACTN1	145.231	165.089	149.579	109.007	123.78	111.286	ENSG00000072110.13	ACTN1	chr14:68874142-68979440	MB231_CTRL	MB231_W2	OK	153.299	114.691	-0.4186	-1.88681	0.00065	0.00473038	yes
ENSG00000072195.14	SPEG	0.844457	0.657361	1.28131	2.04631	3.44668	4.60708	ENSG00000072195.14	SPEG	chr2:219434845-219538772	MB231_CTRL	MB231_W2	OK	0.92771	3.36669	1.85958	0.798556	0.0001	0.000939965	yes
ENSG00000072274.12	TFRC	152.682	164.893	160.221	98.9706	100.041	92.0587	ENSG00000072274.12	TFRC	chr3:196027182-196082189	MB231_CTRL	MB231_W2	OK	159.265	97.0233	-0.715029	-2.67762	5e-05	0.000503098	yes
ENSG00000072501.17	SMC1A	90.2249	94.3902	105.154	53.4828	63.1076	52.9324	ENSG00000072501.17	SMC1A	chrX:53374148-53431120	MB231_CTRL	MB231_W2	OK	96.5896	56.5076	-0.773423	-2.32559	0.0001	0.000939965	yes
ENSG00000072682.18	P4HA2	39.8232	43.8621	40.9979	22.4057	27.4515	23.2649	ENSG00000072682.18	P4HA2	chr5:132184875-132395614	MB231_CTRL	MB231_W2	OK	41.5611	24.374	-0.769887	-2.53921	5e-05	0.000503098	yes
ENSG00000072756.16	TRNT1	7.29963	6.83242	5.83573	15.2357	18.912	16.3801	ENSG00000072756.16	TRNT1	chr3:3126915-3179710	MB231_CTRL	MB231_W2	OK	6.65593	16.8426	1.3394	2.22627	5e-05	0.000503098	yes
ENSG00000072778.19	ACADVL	80.5424	78.8434	77.4579	187.121	236.884	249.167	ENSG00000072778.19	ACADVL	chr17:7189889-7225273	MB231_CTRL	MB231_W2	OK	78.9479	224.391	1.50704	6.02835	5e-05	0.000503098	yes
ENSG00000073060.15	SCARB1	29.7014	27.2985	25.4986	16.0246	15.4497	21.9225	ENSG00000073060.15	SCARB1	chr12:124776855-124882668	MB231_CTRL	MB231_W2	OK	27.4995	17.7989	-0.627613	-1.63368	0.0063	0.0308862	yes
ENSG00000073111.13	MCM2	51.1306	49.4227	48.8491	28.1969	34.6819	25.4351	ENSG00000073111.13	MCM2	chr3:127573068-127622436	MB231_CTRL	MB231_W2	OK	49.8008	29.4379	-0.758492	-2.23692	0.0002	0.00172918	yes
ENSG00000073169.13	SELO	5.91157	5.14753	5.77706	6.95039	8.07446	8.55306	ENSG00000073169.13	SELO	chr22:50200978-50217616	MB231_CTRL	MB231_W2	OK	5.61205	7.8593	0.485872	1.57997	0.0069	0.0331956	yes
ENSG00000073464.11	CLCN4	11.9078	14.9521	13.921	5.17081	5.27943	5.21023	ENSG00000073464.11	CLCN4	chrX:10156944-10237660	MB231_CTRL	MB231_W2	OK	13.5936	5.22016	-1.38076	-5.56947	5e-05	0.000503098	yes
ENSG00000073578.16	SDHA	90.8819	96.6961	98.0631	63.544	67.6901	73.3315	ENSG00000073578.16	SDHA	chr5:218240-256700	MB231_CTRL	MB231_W2	OK	95.2137	68.1885	-0.48164	-2.3092	5e-05	0.000503098	yes
ENSG00000073969.18	NSF	7.7053	8.93378	8.37754	2.79363	5.46143	5.1211	ENSG00000073969.18	NSF	chr17:46590668-46757464	MB231_CTRL	MB231_W2	OK	8.33888	4.45872	-0.903222	-1.59338	0.0023	0.0136382	yes
ENSG00000074071.14	MRPS34	69.1574	69.9106	68.1532	42.8062	46.8342	52.2842	ENSG00000074071.14	MRPS34	chr16:1771889-1773155	MB231_CTRL	MB231_W2	OK	69.0737	47.3082	-0.546046	-3.21809	5e-05	0.000503098	yes
ENSG00000074410.13	CA12	4.00428	3.78509	3.31033	1.4359	2.40063	1.28106	ENSG00000074410.13	CA12	chr15:63321377-63382161	MB231_CTRL	MB231_W2	OK	3.6999	1.70586	-1.11699	-1.5569	0.0001	0.000939965	yes
ENSG00000074603.18	DPP8	11.1671	12.7402	13.2208	17.9822	20.0932	24.5326	ENSG00000074603.18	DPP8	chr15:65442462-65517704	MB231_CTRL	MB231_W2	OK	12.3761	20.8693	0.753832	1.89552	0.0001	0.000939965	yes
ENSG00000074695.5	LMAN1	64.6396	72.0257	78.7743	44.9657	40.6916	46.6919	ENSG00000074695.5	LMAN1	chr18:59327822-59359962	MB231_CTRL	MB231_W2	OK	71.8132	44.1164	-0.702933	-2.68938	0.0001	0.000939965	yes
ENSG00000074800.13	ENO1	1503.68	1597.36	1504.66	729.962	725.118	767.353	ENSG00000074800.13	ENO1	chr1:8861001-8879894	MB231_CTRL	MB231_W2	OK	1535.23	740.811	-1.05128	-5.8723	5e-05	0.000503098	yes
ENSG00000074842.7	MYDGF	87.0248	88.2239	78.2622	53.7409	62.1266	63.5072	ENSG00000074842.7	MYDGF	chr19:4639517-4670370	MB231_CTRL	MB231_W2	OK	84.5036	59.7916	-0.499071	-2.52055	0.0001	0.000939965	yes
ENSG00000074855.10	ANO8	2.30302	3.15432	2.90631	7.01072	7.26133	7.69885	ENSG00000074855.10	ANO8	chr19:17292130-17334829	MB231_CTRL	MB231_W2	OK	2.78788	7.32363	1.39339	2.13846	0.00015	0.00134259	yes
ENSG00000074935.13	TUBE1	5.37759	6.70817	4.4175	11.1775	12.7723	9.0757	ENSG00000074935.13	TUBE1	chr6:112054071-112087529	MB231_CTRL	MB231_W2	OK	5.50109	11.0085	1.00083	1.87299	0.0003	0.00245627	yes
ENSG00000075218.18	GTSE1	17.9567	17.6598	19.2676	25.1603	30.8576	33.8864	ENSG00000075218.18	GTSE1	chr22:46296740-46330810	MB231_CTRL	MB231_W2	OK	18.2947	29.9681	0.712002	2.83263	5e-05	0.000503098	yes
ENSG00000075223.13	SEMA3C	49.6151	53.3651	53.392	29.1224	40.6834	29.1852	ENSG00000075223.13	SEMA3C	chr7:80742537-80922359	MB231_CTRL	MB231_W2	OK	52.1241	32.997	-0.659614	-2.19834	5e-05	0.000503098	yes
ENSG00000075413.17	MARK3	18.7195	26.1062	23.7268	31.9277	31.8452	40.728	ENSG00000075413.17	MARK3	chr14:103385391-103503831	MB231_CTRL	MB231_W2	OK	22.8508	34.8336	0.608235	1.58226	0.00265	0.0153386	yes
ENSG00000075415.12	SLC25A3	283.325	286.395	276.89	209.246	206.256	217.564	ENSG00000075415.12	SLC25A3	chr12:98593590-98606379	MB231_CTRL	MB231_W2	OK	282.204	211.022	-0.419342	-2.24311	0.0002	0.00172918	yes
ENSG00000075426.11	FOSL2	70.6918	78.5513	75.4586	46.3197	56.5474	53.8952	ENSG00000075426.11	FOSL2	chr2:28384408-28417312	MB231_CTRL	MB231_W2	OK	74.9006	52.2541	-0.519433	-2.5037	0.0001	0.000939965	yes
ENSG00000075618.17	FSCN1	10.648	13.3581	9.91039	6.84407	6.41184	9.00663	ENSG00000075618.17	FSCN1	chr7:5592822-5606655	MB231_CTRL	MB231_W2	OK	11.3055	7.42084	-0.607368	-1.98193	0.00035	0.00280437	yes
ENSG00000075624.13	ACTB	6115.83	6537.5	5469.77	3185.03	3412.78	3211.73	ENSG00000075624.13	ACTB	chr7:5527150-5563784	MB231_CTRL	MB231_W2	OK	6041.03	3269.85	-0.885572	-3.81333	5e-05	0.000503098	yes
ENSG00000075643.5	MOCOS	8.93599	11.3872	10.801	7.37115	8.49612	8.96433	ENSG00000075643.5	MOCOS	chr18:36187518-36272157	MB231_CTRL	MB231_W2	OK	10.3747	8.2772	-0.325859	-1.42136	0.0077	0.0362833	yes
ENSG00000075702.16	WDR62	9.70157	10.8325	9.05006	13.9596	17.4563	16.3645	ENSG00000075702.16	WDR62	chr19:36054880-36105106	MB231_CTRL	MB231_W2	OK	9.86137	15.9268	0.691597	3.40439	5e-05	0.000503098	yes
ENSG00000075785.12	RAB7A	92.341	108.96	101.153	65.9167	63.6404	58.1981	ENSG00000075785.12	RAB7A	chr3:128726121-128814796	MB231_CTRL	MB231_W2	OK	100.818	62.5851	-0.687861	-3.77709	5e-05	0.000503098	yes
ENSG00000075826.16	SEC31B	0.663233	0.289113	0.898569	7.0845	6.58136	7.52573	ENSG00000075826.16	SEC31B	chr10:100486641-100559998	MB231_CTRL	MB231_W2	OK	0.616971	7.06386	3.51718	1.5757	5e-05	0.000503098	yes
ENSG00000076003.4	MCM6	38.9462	41.6411	38.2662	22.9633	27.3783	29.9709	ENSG00000076003.4	MCM6	chr2:135839625-135876426	MB231_CTRL	MB231_W2	OK	39.6178	26.7708	-0.565489	-2.4592	0.0002	0.00172918	yes
ENSG00000076555.15	ACACB	4.09449	1.4007	1.91818	6.24014	6.61009	5.60488	ENSG00000076555.15	ACACB	chr12:109111217-109268226	MB231_CTRL	MB231_W2	OK	2.47112	6.1517	1.31582	1.06919	0.0076	0.0359104	yes
ENSG00000076604.14	TRAF4	17.5952	17.7579	17.5787	29.7934	50.11	37.3007	ENSG00000076604.14	TRAF4	chr17:28743983-28750958	MB231_CTRL	MB231_W2	OK	17.6439	39.068	1.14682	3.1922	5e-05	0.000503098	yes
ENSG00000076928.17	ARHGEF1	17.4409	20.3714	19.1089	29.6528	42.23	27.0475	ENSG00000076928.17	ARHGEF1	chr19:41883160-41930150	MB231_CTRL	MB231_W2	OK	18.9737	32.9768	0.797449	1.80016	0.0007	0.00502945	yes
ENSG00000076944.15	STXBP2	15.1963	17.6652	12.9414	19.3386	30.5775	26.5286	ENSG00000076944.15	STXBP2	chr19:7629736-7647873	MB231_CTRL	MB231_W2	OK	15.2676	25.4816	0.738979	1.65426	0.0018	0.0111376	yes
ENSG00000076984.17	MAP2K7	13.0043	13.4717	14.2087	23.4158	19.4401	23.1173	ENSG00000076984.17	MAP2K7	chr19:7903842-7914478	MB231_CTRL	MB231_W2	OK	13.5616	21.9911	0.697396	2.38057	0.0001	0.000939965	yes
ENSG00000077044.10	DGKD	5.0302	5.02679	4.74863	12.0937	15.0217	14.4925	ENSG00000077044.10	DGKD	chr2:233354506-233472104	MB231_CTRL	MB231_W2	OK	4.93521	13.8693	1.49071	2.1829	5e-05	0.000503098	yes
ENSG00000077097.14	TOP2B	24.7443	278.853	34.5018	21.3934	22.0016	20.5088	ENSG00000077097.14	TOP2B	chr3:25174331-25664939	MB231_CTRL	MB231_W2	OK	112.7	21.3013	-2.40347	-6.44164	5e-05	0.000503098	yes
ENSG00000077147.14	TM9SF3	113.289	116.647	125.276	63.5288	74.5526	77.3925	ENSG00000077147.14	TM9SF3	chr10:96518108-96587452	MB231_CTRL	MB231_W2	OK	118.404	71.8246	-0.721164	-2.25946	0.0001	0.000939965	yes
ENSG00000077152.9	UBE2T	29.4423	28.4942	28.9059	55.0025	80.8916	70.0129	ENSG00000077152.9	UBE2T	chr1:202331656-202341980	MB231_CTRL	MB231_W2	OK	28.9474	68.6357	1.24552	5.85062	5e-05	0.000503098	yes
ENSG00000077157.21	PPP1R12B	0.935335	1.99836	1.04737	6.37021	3.62836	4.34992	ENSG00000077157.21	PPP1R12B	chr1:202348698-202710417	MB231_CTRL	MB231_W2	OK	1.32702	4.78283	1.84967	1.00948	0.0003	0.00245627	yes
ENSG00000077232.16	DNAJC10	25.8884	25.0897	31.7941	20.3049	22.8037	20.7512	ENSG00000077232.16	DNAJC10	chr2:182716040-182794464	MB231_CTRL	MB231_W2	OK	27.5907	21.2866	-0.374239	-1.72952	0.00145	0.00933362	yes
ENSG00000077254.14	USP33	21.0224	28.1241	26.6145	34.6236	28.4004	37.0228	ENSG00000077254.14	USP33	chr1:77695986-77759852	MB231_CTRL	MB231_W2	OK	25.2536	33.3489	0.401149	1.35955	0.01015	0.0450195	yes
ENSG00000077380.15	DYNC1I2	49.8187	53.8283	70.2879	33.5203	29.5253	39.9443	ENSG00000077380.15	DYNC1I2	chr2:171687408-171748420	MB231_CTRL	MB231_W2	OK	57.9783	34.33	-0.756045	-2.47753	5e-05	0.000503098	yes
ENSG00000077454.15	LRCH4	25.6684	21.7698	23.8997	30.9585	52.2108	55.4907	ENSG00000077454.15	LRCH4	chr7:100572227-100608175	MB231_CTRL	MB231_W2	OK	23.7793	46.22	0.958813	3.18365	5e-05	0.000503098	yes
ENSG00000077458.12	FAM76B	17.9671	17.7978	18.5287	28.25	25.2553	38.3488	ENSG00000077458.12	FAM76B	chr11:95768941-95832693	MB231_CTRL	MB231_W2	OK	18.0979	30.618	0.758561	1.6382	0.00355	0.0194305	yes
ENSG00000077549.17	CAPZB	172.739	181.386	181.274	80.2039	98.9151	95.8792	ENSG00000077549.17	CAPZB	chr1:19338775-19485539	MB231_CTRL	MB231_W2	OK	178.466	91.6661	-0.961191	-5.10177	5e-05	0.000503098	yes
ENSG00000077721.15	UBE2A	72.475	72.1433	74.8979	86.5887	85.0115	97.6581	ENSG00000077721.15	UBE2A	chrX:119574466-119605895	MB231_CTRL	MB231_W2	OK	73.172	89.7528	0.294664	1.49235	0.00825	0.0382838	yes
ENSG00000077984.5	CST7	11.1676	12.4037	13.3855	3.40192	5.41431	6.76954	ENSG00000077984.5	CST7	chr20:24949229-24959928	MB231_CTRL	MB231_W2	OK	12.3189	5.19526	-1.24561	-3.32578	5e-05	0.000503098	yes
ENSG00000078070.12	MCCC1	16.8427	21.4299	14.8	9.17231	9.2011	8.57661	ENSG00000078070.12	MCCC1	chr3:183015217-183116075	MB231_CTRL	MB231_W2	OK	17.6909	8.98334	-0.977682	-1.78189	0.00195	0.0118792	yes
ENSG00000078140.13	UBE2K	34.2179	35.2932	36.2002	26.7587	24.1748	22.9452	ENSG00000078140.13	UBE2K	chr4:39698043-39782792	MB231_CTRL	MB231_W2	OK	35.2371	24.6262	-0.516901	-2.36535	5e-05	0.000503098	yes
ENSG00000078369.17	GNB1	301.953	305.972	368.585	191.651	190.493	188.777	ENSG00000078369.17	GNB1	chr1:1785284-1891117	MB231_CTRL	MB231_W2	OK	325.503	190.307	-0.774343	-3.32497	5e-05	0.000503098	yes
ENSG00000078401.6	EDN1	11.688	11.056	11.7093	6.3544	7.40053	6.44865	ENSG00000078401.6	EDN1	chr6:12290362-12297194	MB231_CTRL	MB231_W2	OK	11.4844	6.73453	-0.770031	-3.29831	5e-05	0.000503098	yes
ENSG00000078668.13	VDAC3	35.4919	40.9467	40.9164	45.5086	56.6691	52.054	ENSG00000078668.13	VDAC3	chr8:42391623-42405897	MB231_CTRL	MB231_W2	OK	39.1183	51.4106	0.39422	1.71481	0.00145	0.00933362	yes
ENSG00000078808.16	SDF4	62.285	62.6396	57.2922	33.2349	39.099	41.3233	ENSG00000078808.16	SDF4	chr1:1216907-1232031	MB231_CTRL	MB231_W2	OK	60.7389	37.8857	-0.680968	-3.95327	5e-05	0.000503098	yes
ENSG00000079215.13	SLC1A3	6.40975	6.0263	5.61523	7.62104	13.0553	8.51133	ENSG00000079215.13	SLC1A3	chr5:36606354-36725195	MB231_CTRL	MB231_W2	OK	6.0171	9.72923	0.693259	1.35685	0.0036	0.0196502	yes
ENSG00000079246.15	XRCC5	72.613	80.0342	73.5375	51.7735	59.4812	55.1194	ENSG00000079246.15	XRCC5	chr2:216107463-216206303	MB231_CTRL	MB231_W2	OK	75.3949	55.4581	-0.44307	-1.57838	0.0096	0.0431567	yes
ENSG00000079337.15	RAPGEF3	0.815897	0.515618	0.839229	4.09584	4.90162	1.82216	ENSG00000079337.15	RAPGEF3	chr12:47706084-47837898	MB231_CTRL	MB231_W2	OK	0.723581	3.60654	2.31739	1.14828	5e-05	0.000503098	yes
ENSG00000079459.12	FDFT1	29.6931	35.9988	35.3269	20.3812	26.211	26.0321	ENSG00000079459.12	FDFT1	chr8:11795572-11839309	MB231_CTRL	MB231_W2	OK	33.673	24.2081	-0.476102	-1.70399	0.0018	0.0111376	yes
ENSG00000079462.7	PAFAH1B3	48.9181	54.1425	51.8392	28.5204	41.577	46.4872	ENSG00000079462.7	PAFAH1B3	chr19:42297032-42310821	MB231_CTRL	MB231_W2	OK	51.6333	38.8615	-0.409958	-1.75485	0.00305	0.0171451	yes
ENSG00000079616.12	KIF22	18.3994	19.1481	23.3817	42.7082	35.9952	36.7975	ENSG00000079616.12	KIF22	chr16:29790718-29805385	MB231_CTRL	MB231_W2	OK	20.3097	38.5003	0.922699	3.61351	5e-05	0.000503098	yes
ENSG00000079739.15	PGM1	60.3739	66.5345	57.7691	36.441	39.4035	42.0571	ENSG00000079739.15	PGM1	chr1:63440769-63660245	MB231_CTRL	MB231_W2	OK	61.5592	39.3005	-0.647424	-2.80917	5e-05	0.000503098	yes
ENSG00000079819.17	EPB41L2	27.312	36.1731	42.7508	46.1672	56.0817	58.822	ENSG00000079819.17	EPB41L2	chr6:130839346-131063322	MB231_CTRL	MB231_W2	OK	35.412	53.6903	0.600423	1.57809	0.0052	0.0265672	yes
ENSG00000079974.17	RABL2B	2.21942	1.88871	2.14085	4.28569	3.57318	3.05762	ENSG00000079974.17	RABL2B	chr22:50756947-50801309	MB231_CTRL	MB231_W2	OK	2.08299	3.63883	0.804818	1.00354	0.00635	0.031079	yes
ENSG00000079999.13	KEAP1	41.3835	41.7802	36.8795	23.5994	34.1138	29.1808	ENSG00000079999.13	KEAP1	chr19:10486119-10503741	MB231_CTRL	MB231_W2	OK	40.0144	28.9647	-0.466225	-2.06281	0.00055	0.0041207	yes
ENSG00000080608.9	PUM3	48.7794	51.1683	47.2321	29.6026	26.503	32.3635	ENSG00000080608.9	PUM3	chr9:2717501-2844241	MB231_CTRL	MB231_W2	OK	49.0599	29.4897	-0.734334	-1.79298	0.00135	0.00878859	yes
ENSG00000080815.18	PSEN1	19.0055	21.1767	23.1311	13.1538	18.4178	15.0611	ENSG00000080815.18	PSEN1	chr14:73136417-73223691	MB231_CTRL	MB231_W2	OK	21.1045	15.5442	-0.441166	-1.38008	0.00865	0.0397404	yes
ENSG00000080822.16	CLDND1	126.711	139.827	132.08	213.813	252.895	237.116	ENSG00000080822.16	CLDND1	chr3:98497603-98593723	MB231_CTRL	MB231_W2	OK	132.873	234.608	0.820207	3.09642	5e-05	0.000503098	yes
ENSG00000080823.21	MOK	17.3864	23.2884	17.6195	51.1624	41.6703	40.8292	ENSG00000080823.21	MOK	chr14:102080737-102305200	MB231_CTRL	MB231_W2	OK	19.4315	44.554	1.19716	0.524792	0.00715	0.0341897	yes
ENSG00000080824.18	HSP90AA1	761.578	790.428	819.746	448.741	397.946	425.612	ENSG00000080824.18	HSP90AA1	chr14:102080737-102305200	MB231_CTRL	MB231_W2	OK	790.584	424.1	-0.898516	-2.33494	5e-05	0.000503098	yes
ENSG00000080845.17	DLGAP4	37.9383	43.4161	36.9041	26.7834	31.0284	29.6246	ENSG00000080845.17	DLGAP4	chr20:36306335-36573391	MB231_CTRL	MB231_W2	OK	39.4195	29.1454	-0.43564	-1.82986	0.00065	0.00473038	yes
ENSG00000080947.14	CROCCP3	0.303558	1.92932	0.125617	3.04723	8.22606	3.1995	ENSG00000080947.14	CROCCP3	chr1:16460947-16499257	MB231_CTRL	MB231_W2	OK	0.786164	4.82426	2.61741	1.41212	0.0095	0.0428241	yes
ENSG00000081041.8	CXCL2	7.35887	9.48821	9.04749	18.7102	23.3887	20.6172	ENSG00000081041.8	CXCL2	chr4:74097034-74099293	MB231_CTRL	MB231_W2	OK	8.63152	20.9054	1.27619	3.38328	5e-05	0.000503098	yes
ENSG00000081307.12	UBA5	16.7305	12.8044	15.6569	21.3512	23.6358	26.4423	ENSG00000081307.12	UBA5	chr3:132558137-132874223	MB231_CTRL	MB231_W2	OK	15.0639	23.8098	0.660454	1.64992	0.00235	0.0138868	yes
ENSG00000081377.16	CDC14B	12.0188	14.6623	13.2979	7.2425	9.79118	9.88709	ENSG00000081377.16	CDC14B	chr9:96450200-96619830	MB231_CTRL	MB231_W2	OK	13.3263	8.97359	-0.570524	-1.45219	0.0028	0.01604	yes
ENSG00000081665.13	ZNF506	7.60889	6.77082	7.57301	9.84307	15.9311	20.4321	ENSG00000081665.13	ZNF506	chr19:19757365-19836073	MB231_CTRL	MB231_W2	OK	7.31757	15.4021	1.07369	2.3564	5e-05	0.000503098	yes
ENSG00000081791.8	KIAA0141	11.9497	10.0597	9.71928	22.5423	26.4979	24.1164	ENSG00000081791.8	KIAA0141	chr5:141923807-141942047	MB231_CTRL	MB231_W2	OK	10.5762	24.3855	1.2052	3.76803	5e-05	0.000503098	yes
ENSG00000081803.15	CADPS2	4.18972	4.26056	3.1688	3.06329	2.54869	1.25913	ENSG00000081803.15	CADPS2	chr7:122318424-122886759	MB231_CTRL	MB231_W2	OK	3.87303	2.29037	-0.757881	-1.6645	0.0032	0.0178059	yes
ENSG00000081870.11	HSPB11	45.765	50.0688	43.1424	77.2508	94.4014	110.88	ENSG00000081870.11	HSPB11	chr1:53916573-53945929	MB231_CTRL	MB231_W2	OK	46.3254	94.1774	1.02358	5.28761	5e-05	0.000503098	yes
ENSG00000082014.16	SMARCD3	3.79555	4.58991	3.92076	6.6048	6.93502	15.199	ENSG00000082014.16	SMARCD3	chr7:151232488-151277896	MB231_CTRL	MB231_W2	OK	4.10207	9.57961	1.22361	1.37795	0.0046	0.0241105	yes
ENSG00000082512.14	TRAF5	5.85878	4.08653	5.1068	12.2835	15.1993	12.2029	ENSG00000082512.14	TRAF5	chr1:211326614-211374946	MB231_CTRL	MB231_W2	OK	5.01737	13.2286	1.39865	3.12675	5e-05	0.000503098	yes
ENSG00000082516.8	GEMIN5	14.9226	15.2883	15.4789	6.82133	7.35898	9.33924	ENSG00000082516.8	GEMIN5	chr5:154887415-154938209	MB231_CTRL	MB231_W2	OK	15.2299	7.83985	-0.958013	-2.52395	5e-05	0.000503098	yes
ENSG00000082641.15	NFE2L1	105.593	110.841	120.244	82.3721	84.942	80.536	ENSG00000082641.15	NFE2L1	chr17:48048328-48061487	MB231_CTRL	MB231_W2	OK	112.226	82.6167	-0.441901	-1.43562	0.0109	0.0476425	yes
ENSG00000082781.11	ITGB5	78.8517	87.1064	79.3771	41.8345	41.0718	59.1648	ENSG00000082781.11	ITGB5	chr3:124761947-124901418	MB231_CTRL	MB231_W2	OK	81.7784	47.3571	-0.788141	-2.71503	5e-05	0.000503098	yes
ENSG00000083444.16	PLOD1	44.1962	48.4114	49.8339	21.4087	30.6175	24.937	ENSG00000083444.16	PLOD1	chr1:11934204-11975538	MB231_CTRL	MB231_W2	OK	47.4805	25.6544	-0.888129	-3.86132	5e-05	0.000503098	yes
ENSG00000083457.11	ITGAE	33.977	32.3545	33.1052	80.0789	93.8266	104.954	ENSG00000083457.11	ITGAE	chr17:3714627-3801243	MB231_CTRL	MB231_W2	OK	33.1456	92.9531	1.48769	4.69438	5e-05	0.000503098	yes
ENSG00000083520.14	DIS3	29.1988	27.5632	25.6725	17.322	12.7109	11.7957	ENSG00000083520.14	DIS3	chr13:72727748-73016461	MB231_CTRL	MB231_W2	OK	27.4781	13.9429	-0.978758	-1.78407	0.00315	0.0175845	yes
ENSG00000083812.11	ZNF324	3.0036	3.59321	4.15677	5.41434	5.92401	5.20227	ENSG00000083812.11	ZNF324	chr19:58467044-58512413	MB231_CTRL	MB231_W2	OK	3.58453	5.51354	0.621196	1.58302	0.00865	0.0397404	yes
ENSG00000083828.15	ZNF586	2.52588	4.44065	4.7315	7.59202	11.7005	15.7022	ENSG00000083828.15	ZNF586	chr19:57769654-57916610	MB231_CTRL	MB231_W2	OK	3.89934	11.6649	1.58087	1.69613	0.00225	0.0134005	yes
ENSG00000083838.15	ZNF446	1.53439	2.06195	1.27003	3.26625	4.88138	3.3664	ENSG00000083838.15	ZNF446	chr19:58467044-58512413	MB231_CTRL	MB231_W2	OK	1.62212	3.83801	1.24247	1.79012	0.00085	0.00593698	yes
ENSG00000084070.11	SMAP2	11.7996	12.613	12.1908	5.69401	6.03211	8.93694	ENSG00000084070.11	SMAP2	chr1:40344849-40423326	MB231_CTRL	MB231_W2	OK	12.2011	6.88769	-0.824922	-2.52339	5e-05	0.000503098	yes
ENSG00000084073.8	ZMPSTE24	51.0846	61.1376	60.3405	36.552	42.4052	38.8341	ENSG00000084073.8	ZMPSTE24	chr1:40258106-40294184	MB231_CTRL	MB231_W2	OK	57.5209	39.2638	-0.550887	-3.2558	5e-05	0.000503098	yes
ENSG00000084090.13	STARD7	95.565	98.4774	102.24	56.114	63.4643	69.4333	ENSG00000084090.13	STARD7	chr2:96184858-96242621	MB231_CTRL	MB231_W2	OK	98.7607	63.0039	-0.648497	-3.49301	5e-05	0.000503098	yes
ENSG00000084207.15	GSTP1	120.369	118.968	104.953	62.0159	71.2516	84.4947	ENSG00000084207.15	GSTP1	chr11:67583594-67586660	MB231_CTRL	MB231_W2	OK	114.763	72.5874	-0.660868	-3.68738	5e-05	0.000503098	yes
ENSG00000084234.16	APLP2	305.621	320.931	326.021	205.744	215.735	231.811	ENSG00000084234.16	APLP2	chr11:130069836-130144811	MB231_CTRL	MB231_W2	OK	317.524	217.763	-0.544108	-1.63843	0.00355	0.0194305	yes
ENSG00000084463.7	WBP11	32.9637	35.7921	43.5427	25.5455	28.0685	26.9235	ENSG00000084463.7	WBP11	chr12:14784578-14803540	MB231_CTRL	MB231_W2	OK	37.4328	26.8458	-0.479607	-1.86543	0.0014	0.00906419	yes
ENSG00000084623.11	EIF3I	112.127	117.799	108.274	83.4718	100.863	89.8608	ENSG00000084623.11	EIF3I	chr1:32209093-32231604	MB231_CTRL	MB231_W2	OK	112.733	91.3985	-0.302671	-1.70103	0.0024	0.0141469	yes
ENSG00000084652.15	TXLNA	23.4522	26.5253	24.5147	16.5354	20.2484	18.3282	ENSG00000084652.15	TXLNA	chr1:32179685-32198285	MB231_CTRL	MB231_W2	OK	24.8307	18.3707	-0.434722	-2.63764	5e-05	0.000503098	yes
ENSG00000084731.14	KIF3C	4.86146	5.52992	7.66545	2.9489	3.2193	3.72872	ENSG00000084731.14	KIF3C	chr2:25926595-25982749	MB231_CTRL	MB231_W2	OK	6.01894	3.29897	-0.867494	-1.68842	0.0023	0.0136382	yes
ENSG00000084733.10	RAB10	72.4549	77.5726	86.3567	45.187	51.8605	55.3594	ENSG00000084733.10	RAB10	chr2:26034106-26137454	MB231_CTRL	MB231_W2	OK	78.7947	50.8023	-0.633206	-3.8212	5e-05	0.000503098	yes
ENSG00000084754.10	HADHA	60.445	60.7583	72.647	36.1249	36.8812	39.0852	ENSG00000084754.10	HADHA	chr2:26190634-26290468	MB231_CTRL	MB231_W2	OK	64.6167	37.3638	-0.790267	-2.83209	5e-05	0.000503098	yes
ENSG00000085063.14	CD59	185.129	208.518	181.079	217.139	256.923	239.685	ENSG00000085063.14	CD59	chr11:33698260-33736445	MB231_CTRL	MB231_W2	OK	191.575	237.916	0.312538	1.78516	0.0019	0.0116365	yes
ENSG00000085117.11	CD82	83.7983	89.9273	90.7248	59.5372	61.2888	54.3829	ENSG00000085117.11	CD82	chr11:44564426-44620363	MB231_CTRL	MB231_W2	OK	88.1501	58.403	-0.59392	-1.96936	0.00175	0.0108959	yes
ENSG00000085274.15	MYNN	6.24542	6.95403	6.4208	6.50994	10.4888	8.81932	ENSG00000085274.15	MYNN	chr3:169772830-169789716	MB231_CTRL	MB231_W2	OK	6.54008	8.60602	0.396037	1.6135	0.00355	0.0194305	yes
ENSG00000085377.13	PREP	16.2762	19.58	17.6134	7.99737	11.726	10.6268	ENSG00000085377.13	PREP	chr6:105277564-105403084	MB231_CTRL	MB231_W2	OK	17.8232	10.1167	-0.817015	-3.61274	5e-05	0.000503098	yes
ENSG00000085491.15	SLC25A24	53.8076	60.9915	68.2665	46.9545	44.1452	48.7222	ENSG00000085491.15	SLC25A24	chr1:108134035-108202743	MB231_CTRL	MB231_W2	OK	61.0219	46.6073	-0.38877	-2.24176	0.00015	0.00134259	yes
ENSG00000085662.13	AKR1B1	172.181	175.549	165.078	90.397	123.015	107.349	ENSG00000085662.13	AKR1B1	chr7:134442349-134459284	MB231_CTRL	MB231_W2	OK	170.936	106.92	-0.676919	-3.40684	5e-05	0.000503098	yes
ENSG00000085733.15	CTTN	62.0737	65.8289	68.8946	117.776	139.322	159.382	ENSG00000085733.15	CTTN	chr11:70270699-70436584	MB231_CTRL	MB231_W2	OK	65.5991	138.826	1.08153	3.22781	5e-05	0.000503098	yes
ENSG00000085832.16	EPS15	33.5859	36.1273	37.5001	20.1451	22.0452	21.8914	ENSG00000085832.16	EPS15	chr1:51354262-51561629	MB231_CTRL	MB231_W2	OK	35.7377	21.3606	-0.742497	-3.18913	5e-05	0.000503098	yes
ENSG00000086061.15	DNAJA1	90.5763	101.16	110.157	52.5669	52.2647	56.4409	ENSG00000086061.15	DNAJA1	chr9:33025210-33039907	MB231_CTRL	MB231_W2	OK	100.631	53.7575	-0.904537	-5.07681	5e-05	0.000503098	yes
ENSG00000086062.12	B4GALT1	72.2708	77.4242	74.9236	45.8984	46.5849	45.9515	ENSG00000086062.12	B4GALT1	chr9:33104081-33179983	MB231_CTRL	MB231_W2	OK	74.8729	46.1449	-0.698272	-4.32964	5e-05	0.000503098	yes
ENSG00000086289.11	EPDR1	41.1073	42.4871	39.6192	22.6247	22.7378	25.0247	ENSG00000086289.11	EPDR1	chr7:37683795-38025695	MB231_CTRL	MB231_W2	OK	41.0712	23.4624	-0.807777	-3.56453	5e-05	0.000503098	yes
ENSG00000086300.15	SNX10	1.97758	2.06005	2.10634	2.4345	4.98827	3.49686	ENSG00000086300.15	SNX10	chr7:26291894-26376701	MB231_CTRL	MB231_W2	OK	2.04799	3.63987	0.82968	1.09893	0.00615	0.0303356	yes
ENSG00000086598.10	TMED2	151.046	159.302	170.044	192.488	203.532	191.041	ENSG00000086598.10	TMED2	chr12:123575890-123598577	MB231_CTRL	MB231_W2	OK	160.131	195.687	0.289301	1.74306	0.00195	0.0118792	yes
ENSG00000086666.18	ZFAND6	47.4184	56.8554	57.3295	71.8916	75.806	62.5334	ENSG00000086666.18	ZFAND6	chr15:80059567-80138393	MB231_CTRL	MB231_W2	OK	53.8678	70.077	0.379519	1.80535	0.0009	0.00624357	yes
ENSG00000086712.12	TXLNG	14.4744	17.6001	15.1785	7.88552	9.05333	7.92101	ENSG00000086712.12	TXLNG	chrX:16786426-16870414	MB231_CTRL	MB231_W2	OK	15.751	8.28662	-0.92659	-1.94096	0.0011	0.00740172	yes
ENSG00000086730.16	LAT2	0.949923	0.353167	0.165536	1.93181	2.54187	1.53419	ENSG00000086730.16	LAT2	chr7:74199651-74229834	MB231_CTRL	MB231_W2	OK	0.489542	2.00262	2.03238	0.745194	0.0019	0.0116365	yes
ENSG00000086827.8	ZW10	23.2469	26.1151	23.6966	16.2162	16.3159	14.7707	ENSG00000086827.8	ZW10	chr11:113733186-113773811	MB231_CTRL	MB231_W2	OK	24.3529	15.7676	-0.627129	-3.24783	5e-05	0.000503098	yes
ENSG00000087074.7	PPP1R15A	26.3522	32.9186	35.3352	32.6162	42.3907	45.3964	ENSG00000087074.7	PPP1R15A	chr19:48872391-48876057	MB231_CTRL	MB231_W2	OK	31.5353	40.1344	0.347871	1.86827	0.0016	0.0101235	yes
ENSG00000087086.14	FTL	1321.92	1437.31	1314.93	755.865	982.663	881.638	ENSG00000087086.14	FTL	chr19:48965300-48966878	MB231_CTRL	MB231_W2	OK	1358.05	873.389	-0.636842	-3.99609	5e-05	0.000503098	yes
ENSG00000087088.19	BAX	37.2041	34.4274	35.1883	47.1909	62.3236	58.1683	ENSG00000087088.19	BAX	chr19:48954814-48961798	MB231_CTRL	MB231_W2	OK	35.6066	55.8943	0.650554	2.43708	5e-05	0.000503098	yes
ENSG00000087206.16	UIMC1	10.8999	11.1572	15.4487	13.4691	22.4442	23.0583	ENSG00000087206.16	UIMC1	chr5:176905004-177022633	MB231_CTRL	MB231_W2	OK	12.502	19.6572	0.652903	1.52525	0.0049	0.0253321	yes
ENSG00000087258.13	GNAO1	12.1181	15.4515	14.4874	7.56994	10.287	10.3831	ENSG00000087258.13	GNAO1	chr16:56191389-56357444	MB231_CTRL	MB231_W2	OK	14.019	9.41337	-0.574605	-1.61439	0.00155	0.00984337	yes
ENSG00000087266.15	SH3BP2	11.1571	12.4243	11.5869	20.8197	21.9651	19.9827	ENSG00000087266.15	SH3BP2	chr4:2793022-2841098	MB231_CTRL	MB231_W2	OK	11.7228	20.9225	0.835741	1.96024	0.0001	0.000939965	yes
ENSG00000087269.15	NOP14	27.917	32.9538	34.613	23.2109	23.6686	28.2774	ENSG00000087269.15	NOP14	chr4:2934898-2963385	MB231_CTRL	MB231_W2	OK	31.8279	25.0523	-0.345351	-1.95339	0.0006	0.00442867	yes
ENSG00000087299.11	L2HGDH	5.49085	5.60872	7.06767	7.52294	14.3642	10.3869	ENSG00000087299.11	L2HGDH	chr14:50237562-50416461	MB231_CTRL	MB231_W2	OK	6.05575	10.758	0.829033	1.53874	0.00825	0.0382838	yes
ENSG00000087448.9	KLHL42	4.57454	5.08746	4.41713	9.54596	17.5947	14.1438	ENSG00000087448.9	KLHL42	chr12:27779820-27803040	MB231_CTRL	MB231_W2	OK	4.69304	13.7615	1.55204	3.81204	5e-05	0.000503098	yes
ENSG00000087460.23	GNAS	302.207	329.749	306.705	235.389	279.931	253.69	ENSG00000087460.23	GNAS	chr20:58818918-58911192	MB231_CTRL	MB231_W2	OK	312.887	256.337	-0.287602	-1.59489	0.00375	0.0202962	yes
ENSG00000087842.10	PIR	10.4967	13.0757	10.907	5.94586	2.66228	6.12643	ENSG00000087842.10	PIR	chrX:15384798-15556529	MB231_CTRL	MB231_W2	OK	11.4931	4.91152	-1.22653	-2.3972	5e-05	0.000503098	yes
ENSG00000087903.12	RFX2	4.01594	5.22935	4.48605	8.74166	9.41716	11.9533	ENSG00000087903.12	RFX2	chr19:5978402-6199572	MB231_CTRL	MB231_W2	OK	4.57711	10.0374	1.13287	1.23755	0.00015	0.00134259	yes
ENSG00000088247.16	KHSRP	256.496	273.065	231.242	152.737	171.685	182.473	ENSG00000088247.16	KHSRP	chr19:6413347-6424794	MB231_CTRL	MB231_W2	OK	253.601	168.965	-0.585837	-2.3474	5e-05	0.000503098	yes
ENSG00000088256.8	GNA11	44.2432	44.441	45.1224	28.1832	31.607	27.73	ENSG00000088256.8	GNA11	chr19:3094409-3124004	MB231_CTRL	MB231_W2	OK	44.6022	29.1734	-0.61246	-2.90092	0.0001	0.000939965	yes
ENSG00000088305.18	DNMT3B	0.754135	0.772495	1.52545	1.24482	2.85428	2.55364	ENSG00000088305.18	DNMT3B	chr20:32762384-32809356	MB231_CTRL	MB231_W2	OK	1.01736	2.21758	1.12416	2.64437	5e-05	0.000503098	yes
ENSG00000088325.15	TPX2	56.2944	66.7813	69.0506	41.5344	46.9352	44.2317	ENSG00000088325.15	TPX2	chr20:31739270-31801805	MB231_CTRL	MB231_W2	OK	64.0421	44.2338	-0.533872	-3.32904	5e-05	0.000503098	yes
ENSG00000088340.15	FER1L4	0.285202	0.0986781	0.116606	2.28725	3.63421	4.16275	ENSG00000088340.15	FER1L4	chr20:35558736-35607562	MB231_CTRL	MB231_W2	OK	0.166829	3.3614	4.33262	0.511254	0.00015	0.00134259	yes
ENSG00000088367.21	EPB41L1	6.9918	9.62866	7.80878	2.8527	6.584	3.94323	ENSG00000088367.21	EPB41L1	chr20:36091503-36232799	MB231_CTRL	MB231_W2	OK	8.14308	4.45998	-0.868538	-1.15232	0.00715	0.0341897	yes
ENSG00000088387.18	DOCK9	53.1064	48.3349	45.4713	27.4242	26.1558	29.3054	ENSG00000088387.18	DOCK9	chr13:98793428-99086625	MB231_CTRL	MB231_W2	OK	48.9708	27.6285	-0.825766	-1.85434	0.0024	0.0141469	yes
ENSG00000088448.14	ANKRD10	11.4787	14.1019	9.71118	47.322	35.4071	47.2355	ENSG00000088448.14	ANKRD10	chr13:110878539-110915069	MB231_CTRL	MB231_W2	OK	11.7639	43.3215	1.88072	3.53549	5e-05	0.000503098	yes
ENSG00000088451.10	TGDS	4.04541	4.96322	3.4861	9.09798	8.95581	6.11895	ENSG00000088451.10	TGDS	chr13:94574050-94596257	MB231_CTRL	MB231_W2	OK	4.16491	8.05758	0.952061	1.97727	0.00015	0.00134259	yes
ENSG00000088812.17	ATRN	8.63253	9.71364	8.5598	6.72729	6.10901	6.23803	ENSG00000088812.17	ATRN	chr20:3471039-3651122	MB231_CTRL	MB231_W2	OK	8.96866	6.35811	-0.496295	-2.68231	5e-05	0.000503098	yes
ENSG00000088832.15	FKBP1A	356.444	369.95	355.367	264.034	319.041	265.93	ENSG00000088832.15	FKBP1A	chr20:1309908-1393172	MB231_CTRL	MB231_W2	OK	360.587	283.002	-0.349537	-2.05094	0.0002	0.00172918	yes
ENSG00000088854.12	C20orf194	2.25944	2.98722	3.56434	3.59105	3.62615	4.41077	ENSG00000088854.12	C20orf194	chr20:3249304-3407625	MB231_CTRL	MB231_W2	OK	2.937	3.87599	0.400222	1.72698	0.0037	0.0200658	yes
ENSG00000088888.17	MAVS	16.8377	20.0823	19.216	13.9634	16.1399	15.693	ENSG00000088888.17	MAVS	chr20:3846798-3876123	MB231_CTRL	MB231_W2	OK	18.712	15.2654	-0.293694	-1.77116	0.0023	0.0136382	yes
ENSG00000088930.7	XRN2	27.3752	30.807	27.9102	15.9892	19.7008	18.9254	ENSG00000088930.7	XRN2	chr20:21302730-21389827	MB231_CTRL	MB231_W2	OK	28.6975	18.2051	-0.65658	-4.08085	5e-05	0.000503098	yes
ENSG00000088986.10	DYNLL1	325.204	340.016	349.298	510.214	574.925	583.181	ENSG00000088986.10	DYNLL1	chr12:120469849-120498493	MB231_CTRL	MB231_W2	OK	338.173	556.106	0.717601	4.16758	5e-05	0.000503098	yes
ENSG00000089006.16	SNX5	53.3643	62.2022	63.0694	98.974	117.257	121.911	ENSG00000089006.16	SNX5	chr20:17941596-18059188	MB231_CTRL	MB231_W2	OK	59.5453	112.714	0.920607	3.62506	5e-05	0.000503098	yes
ENSG00000089009.15	RPL6	385.28	424.125	424.622	299.976	360.264	337.385	ENSG00000089009.15	RPL6	chr12:112405189-112509913	MB231_CTRL	MB231_W2	OK	411.343	332.541	-0.306806	-1.5172	0.00775	0.0364418	yes
ENSG00000089050.15	RBBP9	10.4387	13.0305	12.6182	8.79147	9.13325	9.12086	ENSG00000089050.15	RBBP9	chr20:18486539-18497243	MB231_CTRL	MB231_W2	OK	12.0292	9.01519	-0.416107	-1.84812	0.0008	0.00564084	yes
ENSG00000089053.12	ANAPC5	38.8213	41.8265	42.5984	53.0326	57.1169	61.2464	ENSG00000089053.12	ANAPC5	chr12:121308244-121399896	MB231_CTRL	MB231_W2	OK	41.0821	57.132	0.47579	2.13318	5e-05	0.000503098	yes
ENSG00000089060.11	SLC8B1	25.1824	30.8411	30.241	18.2322	23.3199	21.514	ENSG00000089060.11	SLC8B1	chr12:113298758-113391625	MB231_CTRL	MB231_W2	OK	28.7548	21.022	-0.451903	-1.42635	0.01005	0.0446965	yes
ENSG00000089123.15	TASP1	2.13878	1.82336	2.20181	2.01609	4.70865	4.06059	ENSG00000089123.15	TASP1	chr20:13389391-13638940	MB231_CTRL	MB231_W2	OK	2.05465	3.59511	0.807143	1.2792	0.00405	0.0216567	yes
ENSG00000089220.4	PEBP1	97.0375	100.546	94.7953	53.6117	71.969	74.4342	ENSG00000089220.4	PEBP1	chr12:118063592-118145584	MB231_CTRL	MB231_W2	OK	97.4597	66.6716	-0.547733	-3.07214	5e-05	0.000503098	yes
ENSG00000089248.6	ERP29	100.276	103.126	119.341	49.716	52.9639	58.5426	ENSG00000089248.6	ERP29	chr12:112013315-112023451	MB231_CTRL	MB231_W2	OK	107.581	53.7409	-1.00133	-5.52141	5e-05	0.000503098	yes
ENSG00000089280.18	FUS	91.1558	109.203	95.6858	147.24	163.733	175.69	ENSG00000089280.18	FUS	chr16:31180109-31194871	MB231_CTRL	MB231_W2	OK	98.6816	162.221	0.717108	2.42398	5e-05	0.000503098	yes
ENSG00000089289.15	IGBP1	15.0665	16.9783	15.8007	11.6381	12.9338	12.5201	ENSG00000089289.15	IGBP1	chrX:70133448-70166324	MB231_CTRL	MB231_W2	OK	15.9485	12.364	-0.367279	-1.94394	0.0006	0.00442867	yes
ENSG00000089335.20	ZNF302	4.11088	4.60832	7.24272	11.8303	14.9944	11.155	ENSG00000089335.20	ZNF302	chr19:34677638-34686397	MB231_CTRL	MB231_W2	OK	5.32064	12.6599	1.2506	2.74221	5e-05	0.000503098	yes
ENSG00000089351.14	GRAMD1A	14.1141	15.7456	17.4717	22.3129	20.2691	29.2843	ENSG00000089351.14	GRAMD1A	chr19:34994783-35026471	MB231_CTRL	MB231_W2	OK	15.7771	23.9554	0.602518	1.94979	0.00015	0.00134259	yes
ENSG00000089597.16	GANAB	162.36	151.357	146.344	77.6319	87.1565	78.3421	ENSG00000089597.16	GANAB	chr11:62624825-62646726	MB231_CTRL	MB231_W2	OK	153.354	81.0435	-0.920096	-3.39922	5e-05	0.000503098	yes
ENSG00000089682.16	RBM41	5.75727	6.73053	9.3004	18.9664	10.1173	11.396	ENSG00000089682.16	RBM41	chrX:107064419-107118823	MB231_CTRL	MB231_W2	OK	7.26273	13.4932	0.893653	1.69948	0.0025	0.0146112	yes
ENSG00000089685.14	BIRC5	98.6638	104.316	102.497	108.994	141.877	132.336	ENSG00000089685.14	BIRC5	chr17:78214185-78225636	MB231_CTRL	MB231_W2	OK	101.825	127.736	0.327065	1.79214	0.00175	0.0108959	yes
ENSG00000089737.15	DDX24	50.7665	53.1583	55.795	38.5638	39.4921	43.215	ENSG00000089737.15	DDX24	chr14:94026328-94081245	MB231_CTRL	MB231_W2	OK	53.2399	40.4236	-0.39731	-1.91601	0.00085	0.00593698	yes
ENSG00000089916.17	GPATCH2L	19.4931	19.9379	25.4465	33.1247	50.1248	31.9848	ENSG00000089916.17	GPATCH2L	chr14:76131706-76263474	MB231_CTRL	MB231_W2	OK	21.6259	38.4114	0.828778	1.63658	0.0054	0.0273857	yes
ENSG00000090013.9	BLVRB	49.0195	53.2119	47.7187	22.1348	45.4477	34.4213	ENSG00000090013.9	BLVRB	chr19:40447788-40465840	MB231_CTRL	MB231_W2	OK	49.9833	34.0013	-0.555858	-2.60136	5e-05	0.000503098	yes
ENSG00000090263.15	MRPS33	32.6101	40.4503	43.9059	45.4675	50.7401	51.8303	ENSG00000090263.15	MRPS33	chr7:141002609-141015228	MB231_CTRL	MB231_W2	OK	38.9888	49.346	0.339874	1.58685	0.00645	0.0314181	yes
ENSG00000090273.13	NUDC	46.7038	50.13	55.223	30.0155	32.2859	34.8358	ENSG00000090273.13	NUDC	chr1:26890487-26946862	MB231_CTRL	MB231_W2	OK	50.6856	32.3791	-0.646515	-3.32129	5e-05	0.000503098	yes
ENSG00000090432.6	MUL1	21.8776	23.0058	22.9878	13.4943	14.2428	13.9926	ENSG00000090432.6	MUL1	chr1:20499447-20508161	MB231_CTRL	MB231_W2	OK	22.6237	13.9099	-0.701723	-3.62827	5e-05	0.000503098	yes
ENSG00000090447.11	TFAP4	11.6846	10.4871	9.94525	7.03511	7.97527	7.50147	ENSG00000090447.11	TFAP4	chr16:4257185-4273075	MB231_CTRL	MB231_W2	OK	10.7057	7.50395	-0.512652	-1.70202	0.00195	0.0118792	yes
ENSG00000090470.14	PDCD7	8.68842	11.0978	11.6659	5.72389	7.05764	6.4898	ENSG00000090470.14	PDCD7	chr15:65117378-65133836	MB231_CTRL	MB231_W2	OK	10.484	6.42378	-0.706701	-2.21916	5e-05	0.000503098	yes
ENSG00000090581.9	GNPTG	3.85115	4.93532	3.14581	6.46983	13.8662	9.36695	ENSG00000090581.9	GNPTG	chr16:1351922-1414751	MB231_CTRL	MB231_W2	OK	3.97743	9.901	1.31574	1.77004	0.00055	0.0041207	yes
ENSG00000090863.11	GLG1	31.5374	36.1434	36.3406	19.3928	19.8213	20.332	ENSG00000090863.11	GLG1	chr16:74447426-74607144	MB231_CTRL	MB231_W2	OK	34.6738	19.8487	-0.804803	-2.76137	5e-05	0.000503098	yes
ENSG00000090924.14	PLEKHG2	4.85405	2.76494	5.69322	10.9044	9.45448	12.9246	ENSG00000090924.14	PLEKHG2	chr19:39412584-39428415	MB231_CTRL	MB231_W2	OK	4.4374	11.0945	1.32205	1.38417	5e-05	0.000503098	yes
ENSG00000091409.14	ITGA6	142.026	158.779	189.461	81.633	76.5214	67.6331	ENSG00000091409.14	ITGA6	chr2:172427353-172608669	MB231_CTRL	MB231_W2	OK	163.422	75.2625	-1.1186	-3.01643	5e-05	0.000503098	yes
ENSG00000091436.16	AC013461.1	16.5283	18.8194	21.6019	9.86616	10.6599	11.6639	ENSG00000091436.16	AC013461.1	chr2:173075434-173282036	MB231_CTRL	MB231_W2	OK	18.9832	10.73	-0.823073	-4.25908	5e-05	0.000503098	yes
ENSG00000091527.15	CDV3	67.8591	77.0735	78.6664	42.4081	50.3841	46.06	ENSG00000091527.15	CDV3	chr3:133573729-133590261	MB231_CTRL	MB231_W2	OK	74.533	46.2841	-0.687363	-3.89675	5e-05	0.000503098	yes
ENSG00000091542.8	ALKBH5	76.8176	89.7072	77.4416	53.5306	57.225	53.3633	ENSG00000091542.8	ALKBH5	chr17:18087885-18209954	MB231_CTRL	MB231_W2	OK	81.3221	54.7063	-0.571942	-3.06539	5e-05	0.000503098	yes
ENSG00000091592.15	NLRP1	5.49006	5.32012	5.42449	12.2673	12.1655	13.517	ENSG00000091592.15	NLRP1	chr17:5499426-5619424	MB231_CTRL	MB231_W2	OK	5.41156	12.6499	1.22502	2.6611	5e-05	0.000503098	yes
ENSG00000091622.15	PITPNM3	4.38326	4.52515	4.68565	6.21273	6.55574	8.06926	ENSG00000091622.15	PITPNM3	chr17:6444414-6556494	MB231_CTRL	MB231_W2	OK	4.53136	6.94591	0.61622	1.43047	0.0101	0.0448503	yes
ENSG00000091651.8	ORC6	11.8398	12.8627	13.1256	30.7947	36.9085	35.2274	ENSG00000091651.8	ORC6	chr16:46689642-46698394	MB231_CTRL	MB231_W2	OK	12.6093	34.3102	1.44415	5.013	5e-05	0.000503098	yes
ENSG00000091947.9	TMEM101	24.2256	20.7652	24.0745	15.7845	17.7945	20.2325	ENSG00000091947.9	TMEM101	chr17:44011187-44023946	MB231_CTRL	MB231_W2	OK	23.0218	17.9372	-0.360048	-1.46546	0.00905	0.0411139	yes
ENSG00000091986.15	CCDC80	28.7616	29.5932	27.6457	17.5003	26.3709	12.987	ENSG00000091986.15	CCDC80	chr3:112596793-112649530	MB231_CTRL	MB231_W2	OK	28.6668	18.9527	-0.596978	-1.58863	0.00545	0.0275986	yes
ENSG00000092010.14	PSME1	44.9033	52.3055	60.0346	58.5984	67.7496	75.4761	ENSG00000092010.14	PSME1	chr14:24136157-24141588	MB231_CTRL	MB231_W2	OK	52.4145	67.2747	0.360099	2.07334	0.00035	0.00280437	yes
ENSG00000092094.10	OSGEP	17.21	21.8137	14.8959	32.6074	37.7635	26.7361	ENSG00000092094.10	OSGEP	chr14:20446410-20455105	MB231_CTRL	MB231_W2	OK	17.9732	32.369	0.848767	2.2535	0.00045	0.00346901	yes
ENSG00000092098.16	RNF31	5.02128	8.33906	6.03219	13.8167	13.4704	21.7711	ENSG00000092098.16	RNF31	chr14:24143361-24167402	MB231_CTRL	MB231_W2	OK	6.46418	16.3527	1.33899	1.47462	0.00035	0.00280437	yes
ENSG00000092140.14	G2E3	11.708	12.747	15.0258	19.5742	26.3421	20.3636	ENSG00000092140.14	G2E3	chr14:30437991-30620063	MB231_CTRL	MB231_W2	OK	13.1603	22.0933	0.747421	1.4748	0.00665	0.0322099	yes
ENSG00000092201.9	SUPT16H	54.691	61.3284	63.4067	45.4977	41.9199	46.666	ENSG00000092201.9	SUPT16H	chr14:21351471-21384266	MB231_CTRL	MB231_W2	OK	59.8087	44.6945	-0.420256	-1.49749	0.00975	0.0436805	yes
ENSG00000092820.17	EZR	82.1717	89.8718	92.1017	47.2381	49.159	47.6696	ENSG00000092820.17	EZR	chr6:158765740-158820593	MB231_CTRL	MB231_W2	OK	88.0484	48.0222	-0.874594	-5.22206	5e-05	0.000503098	yes
ENSG00000092871.16	RFFL	12.3823	17.9374	17.0168	10.1069	9.23164	10.9988	ENSG00000092871.16	RFFL	chr17:34927858-35121522	MB231_CTRL	MB231_W2	OK	15.7788	10.1124	-0.64186	-1.37851	0.0064	0.031255	yes
ENSG00000092964.17	DPYSL2	78.9112	88.8581	82.2142	39.142	38.2608	39.2123	ENSG00000092964.17	DPYSL2	chr8:26379258-26658178	MB231_CTRL	MB231_W2	OK	83.3278	38.8717	-1.10008	-4.21521	5e-05	0.000503098	yes
ENSG00000093009.9	CDC45	12.2205	13.6339	13.3076	33.0053	24.8089	24.6382	ENSG00000093009.9	CDC45	chr22:19479458-19520612	MB231_CTRL	MB231_W2	OK	13.054	27.4842	1.07411	2.73308	5e-05	0.000503098	yes
ENSG00000093144.18	ECHDC1	105.26	103.6	114.245	65.8399	64.0457	61.5931	ENSG00000093144.18	ECHDC1	chr6:127288709-127343609	MB231_CTRL	MB231_W2	OK	107.702	63.8262	-0.754817	-2.19507	0.0001	0.000939965	yes
ENSG00000094631.18	HDAC6	12.8224	12.672	12.3056	33.3934	40.0354	43.0075	ENSG00000094631.18	HDAC6	chrX:48801376-48824982	MB231_CTRL	MB231_W2	OK	12.6	38.8121	1.62309	3.71408	5e-05	0.000503098	yes
ENSG00000095002.13	MSH2	18.3091	18.7652	21.6058	13.3097	10.5455	10.9429	ENSG00000095002.13	MSH2	chr2:47402968-47570939	MB231_CTRL	MB231_W2	OK	19.56	11.5994	-0.753864	-3.50954	5e-05	0.000503098	yes
ENSG00000095059.15	DHPS	44.255	42.1127	49.8179	69.9969	76.6833	65.4699	ENSG00000095059.15	DHPS	chr19:12643274-12681902	MB231_CTRL	MB231_W2	OK	45.3952	70.7167	0.639512	2.00062	0.0006	0.00442867	yes
ENSG00000095066.11	HOOK2	4.19725	4.04332	2.7535	11.0213	10.3187	11.6482	ENSG00000095066.11	HOOK2	chr19:12763002-12874951	MB231_CTRL	MB231_W2	OK	3.66469	10.9961	1.58523	1.13816	5e-05	0.000503098	yes
ENSG00000095139.13	ARCN1	150.928	157.96	156.977	97.3031	94.3563	94.3562	ENSG00000095139.13	ARCN1	chr11:118436489-118603033	MB231_CTRL	MB231_W2	OK	155.288	95.3386	-0.703815	-2.67778	5e-05	0.000503098	yes
ENSG00000095203.14	EPB41L4B	6.81853	7.53368	7.60024	3.19207	7.24855	3.53361	ENSG00000095203.14	EPB41L4B	chr9:109171974-109320964	MB231_CTRL	MB231_W2	OK	7.31748	4.65808	-0.651612	-2.54565	5e-05	0.000503098	yes
ENSG00000095261.13	PSMD5	36.2032	34.6117	38.1737	24.9744	27.19	22.0151	ENSG00000095261.13	PSMD5	chr9:120815495-120851355	MB231_CTRL	MB231_W2	OK	36.3295	24.7265	-0.555085	-1.8587	0.00125	0.00825545	yes
ENSG00000095321.16	CRAT	26.105	27.8518	25.7304	14.8336	19.7031	18.7734	ENSG00000095321.16	CRAT	chr9:129094809-129148946	MB231_CTRL	MB231_W2	OK	26.5624	17.77	-0.57994	-1.86625	0.001	0.00683457	yes
ENSG00000095380.10	NANS	58.7378	59.2593	53.7158	37.7132	44.3276	36.2737	ENSG00000095380.10	NANS	chr9:98056738-98119212	MB231_CTRL	MB231_W2	OK	57.2377	39.4382	-0.537373	-2.47744	5e-05	0.000503098	yes
ENSG00000095564.13	BTAF1	8.7201	9.35183	10.4299	12.5162	15.3062	14.4536	ENSG00000095564.13	BTAF1	chr10:91923768-92030325	MB231_CTRL	MB231_W2	OK	9.5006	14.092	0.568785	2.26371	0.0001	0.000939965	yes
ENSG00000095752.6	IL11	17.0227	12.8196	18.2402	24.36	25.2056	27.6221	ENSG00000095752.6	IL11	chr19:55364388-55370463	MB231_CTRL	MB231_W2	OK	16.0275	25.7292	0.682856	2.25379	5e-05	0.000503098	yes
ENSG00000096060.14	FKBP5	22.9497	28.4489	28.705	12.7392	15.313	15.145	ENSG00000096060.14	FKBP5	chr6:35573584-35728583	MB231_CTRL	MB231_W2	OK	26.7012	14.3991	-0.89093	-5.6218	5e-05	0.000503098	yes
ENSG00000096092.5	TMEM14A	40.9985	38.9809	37.8978	48.8561	62.158	63.9336	ENSG00000096092.5	TMEM14A	chr6:52671108-52686588	MB231_CTRL	MB231_W2	OK	39.2924	58.3159	0.56964	2.6143	5e-05	0.000503098	yes
ENSG00000096384.19	HSP90AB1	485.314	586.82	618.732	257.04	245.035	245.58	ENSG00000096384.19	HSP90AB1	chr6:44246165-44253888	MB231_CTRL	MB231_W2	OK	563.622	249.218	-1.17732	-7.0761	5e-05	0.000503098	yes
ENSG00000096401.7	CDC5L	22.1682	25.365	27.872	15.1047	13.7905	14.3513	ENSG00000096401.7	CDC5L	chr6:44387524-44450426	MB231_CTRL	MB231_W2	OK	25.1351	14.4155	-0.802081	-5.08061	5e-05	0.000503098	yes
ENSG00000096654.15	ZNF184	4.45721	4.48628	5.38462	2.68412	3.74711	4.4034	ENSG00000096654.15	ZNF184	chr6:27450742-27473118	MB231_CTRL	MB231_W2	OK	4.77604	3.61154	-0.403199	-1.64899	0.00405	0.0216567	yes
ENSG00000096696.13	DSP	21.6199	24.5283	26.5209	9.73337	9.74484	9.53062	ENSG00000096696.13	DSP	chr6:7541574-7586717	MB231_CTRL	MB231_W2	OK	24.223	9.66961	-1.32485	-6.75086	5e-05	0.000503098	yes
ENSG00000097021.19	ACOT7	71.573	73.8624	64.9292	40.7037	35.5132	32.5852	ENSG00000097021.19	ACOT7	chr1:6264268-6394391	MB231_CTRL	MB231_W2	OK	70.1215	36.2674	-0.951185	-4.77094	5e-05	0.000503098	yes
ENSG00000097046.12	CDC7	8.60284	8.42517	8.74507	12.5527	12.5165	14.0327	ENSG00000097046.12	CDC7	chr1:91500892-91525764	MB231_CTRL	MB231_W2	OK	8.59103	13.034	0.601373	2.02687	5e-05	0.000503098	yes
ENSG00000099194.5	SCD	35.5784	39.4342	34.1046	17.3655	19.5324	20.354	ENSG00000099194.5	SCD	chr10:100347123-100364834	MB231_CTRL	MB231_W2	OK	36.3724	19.084	-0.930484	-5.69653	5e-05	0.000503098	yes
ENSG00000099204.18	ABLIM1	39.1371	43.6231	41.6033	21.2994	20.8174	21.1055	ENSG00000099204.18	ABLIM1	chr10:114431112-114685003	MB231_CTRL	MB231_W2	OK	41.4545	21.0741	-0.976058	-2.74943	5e-05	0.000503098	yes
ENSG00000099250.17	NRP1	102.399	105.7	123.175	76.4591	91.9638	79.1643	ENSG00000099250.17	NRP1	chr10:33177491-33336262	MB231_CTRL	MB231_W2	OK	110.425	82.5291	-0.420088	-1.62249	0.0057	0.0285551	yes
ENSG00000099326.8	MZF1	7.26942	7.71536	6.21468	17.9468	18.5596	23.4848	ENSG00000099326.8	MZF1	chr19:58559128-58599801	MB231_CTRL	MB231_W2	OK	7.06649	19.9971	1.50072	4.03834	5e-05	0.000503098	yes
ENSG00000099331.13	MYO9B	15.8332	17.3639	19.5819	27.0687	29.9849	32.2733	ENSG00000099331.13	MYO9B	chr19:17075780-17214537	MB231_CTRL	MB231_W2	OK	17.593	29.7756	0.759131	1.40463	0.01155	0.0497537	yes
ENSG00000099622.13	CIRBP	36.2985	39.3645	44.8421	63.9413	71.6371	71.8343	ENSG00000099622.13	CIRBP	chr19:1259383-1274880	MB231_CTRL	MB231_W2	OK	40.1684	69.1376	0.783411	3.22626	5e-05	0.000503098	yes
ENSG00000099624.7	ATP5D	130.446	138.333	113.287	96.0096	111.279	99.0374	ENSG00000099624.7	ATP5D	chr19:1241745-1244826	MB231_CTRL	MB231_W2	OK	127.355	102.109	-0.318753	-1.69189	0.0036	0.0196502	yes
ENSG00000099783.11	HNRNPM	125.959	126.383	127.286	72.2378	82.9278	84.1293	ENSG00000099783.11	HNRNPM	chr19:8444569-8489114	MB231_CTRL	MB231_W2	OK	126.542	79.765	-0.665794	-2.46425	5e-05	0.000503098	yes
ENSG00000099899.14	TRMT2A	13.2752	14.5814	17.6087	34.3636	24.846	34.7573	ENSG00000099899.14	TRMT2A	chr22:20080231-20127357	MB231_CTRL	MB231_W2	OK	15.1551	31.3223	1.04738	1.37298	0.00835	0.0386389	yes
ENSG00000099910.16	KLHL22	5.09728	4.70482	6.70025	9.9724	12.783	5.88717	ENSG00000099910.16	KLHL22	chr22:20424814-20495883	MB231_CTRL	MB231_W2	OK	5.50078	9.54753	0.79549	1.40423	0.0042	0.0223325	yes
ENSG00000099917.17	MED15	34.3421	40.2961	38.7579	49.8728	54.8065	59.4736	ENSG00000099917.17	MED15	chr22:20495912-20592218	MB231_CTRL	MB231_W2	OK	37.7987	54.7176	0.533668	1.98958	5e-05	0.000503098	yes
ENSG00000099942.12	CRKL	27.285	28.0444	27.4948	20.1777	22.1777	23.4937	ENSG00000099942.12	CRKL	chr22:20917425-20953749	MB231_CTRL	MB231_W2	OK	27.608	21.9497	-0.330888	-2.10035	0.0003	0.00245627	yes
ENSG00000099949.18	LZTR1	9.41532	10.3389	9.50444	16.4766	20.2877	26.0462	ENSG00000099949.18	LZTR1	chr22:20965107-20999038	MB231_CTRL	MB231_W2	OK	9.7529	20.9368	1.10214	2.10452	5e-05	0.000503098	yes
ENSG00000099956.18	SMARCB1	32.2714	37.0078	43.1841	27.4943	29.1287	28.4738	ENSG00000099956.18	SMARCB1	chr22:23786962-23839128	MB231_CTRL	MB231_W2	OK	37.4878	28.3656	-0.402276	-1.65886	0.0018	0.0111376	yes
ENSG00000099995.18	SF3A1	80.7844	104.162	101.902	58.4086	57.2169	51.9616	ENSG00000099995.18	SF3A1	chr22:30331987-30429053	MB231_CTRL	MB231_W2	OK	95.616	55.8624	-0.775376	-1.99135	0.0008	0.00564084	yes
ENSG00000100023.18	PPIL2	3.20683	5.07903	4.77725	13.7744	20.1523	14.722	ENSG00000100023.18	PPIL2	chr22:21652269-21735834	MB231_CTRL	MB231_W2	OK	4.35437	16.2162	1.8969	2.90428	5e-05	0.000503098	yes
ENSG00000100036.12	SLC35E4	3.87938	4.70353	3.35873	2.43289	1.80748	1.98525	ENSG00000100036.12	SLC35E4	chr22:30635651-30669016	MB231_CTRL	MB231_W2	OK	3.98055	2.07521	-0.939711	-2.10055	0.0007	0.00502945	yes
ENSG00000100038.19	TOP3B	5.59067	6.61765	4.82869	18.1386	20.4234	13.8752	ENSG00000100038.19	TOP3B	chr22:21919419-21982816	MB231_CTRL	MB231_W2	OK	5.679	17.479	1.62192	1.83308	5e-05	0.000503098	yes
ENSG00000100058.12	CRYBB2P1	2.87387	3.19647	3.15504	5.41595	4.72717	9.71868	ENSG00000100058.12	CRYBB2P1	chr22:25448104-25520854	MB231_CTRL	MB231_W2	OK	3.07512	6.6206	1.10632	2.77487	5e-05	0.000503098	yes
ENSG00000100075.9	SLC25A1	43.3573	43.304	40.5135	29.7064	30.811	38.3913	ENSG00000100075.9	SLC25A1	chr22:19175574-19178830	MB231_CTRL	MB231_W2	OK	42.3916	32.9696	-0.362642	-1.82034	0.00165	0.0103809	yes
ENSG00000100083.18	GGA1	5.2087	7.09918	8.3318	17.2009	17.1259	23.0148	ENSG00000100083.18	GGA1	chr22:37608474-37633564	MB231_CTRL	MB231_W2	OK	6.87989	19.1139	1.47416	2.84717	5e-05	0.000503098	yes
ENSG00000100084.14	HIRA	14.5131	15.128	15.5405	8.65747	10.2121	11.4493	ENSG00000100084.14	HIRA	chr22:19330697-19479215	MB231_CTRL	MB231_W2	OK	15.0606	10.1063	-0.575519	-1.7766	0.0021	0.0126444	yes
ENSG00000100099.20	HPS4	5.8625	7.19306	9.11607	17.2952	10.6096	12.1407	ENSG00000100099.20	HPS4	chr22:26429272-26483837	MB231_CTRL	MB231_W2	OK	7.39054	13.3485	0.852928	1.70122	0.00105	0.00712483	yes
ENSG00000100151.15	PICK1	2.16753	1.66154	2.79897	1.78545	5.69831	8.09288	ENSG00000100151.15	PICK1	chr22:38056310-38075701	MB231_CTRL	MB231_W2	OK	2.20935	5.19221	1.23273	1.15715	0.0011	0.00740172	yes
ENSG00000100207.18	TCF20	12.2616	14.7666	11.966	8.54335	8.71469	8.25541	ENSG00000100207.18	TCF20	chr22:42160012-42343616	MB231_CTRL	MB231_W2	OK	12.9981	8.50448	-0.612005	-1.90987	0.00135	0.00878859	yes
ENSG00000100209.9	HSCB	3.2292	4.24649	4.13423	7.13459	8.39543	5.89036	ENSG00000100209.9	HSCB	chr22:28687742-28757515	MB231_CTRL	MB231_W2	OK	3.86998	7.14012	0.883624	1.59074	0.0017	0.0106371	yes
ENSG00000100220.11	RTCB	38.9113	41.009	40.8527	28.5033	29.308	31.9125	ENSG00000100220.11	RTCB	chr22:32387581-32412255	MB231_CTRL	MB231_W2	OK	40.2577	29.908	-0.428734	-1.72139	0.00235	0.0138868	yes
ENSG00000100226.15	GTPBP1	9.41344	9.43484	9.021	14.1651	18.3756	16.5306	ENSG00000100226.15	GTPBP1	chr22:38705722-38794198	MB231_CTRL	MB231_W2	OK	9.28976	16.3571	0.816202	1.80348	0.00085	0.00593698	yes
ENSG00000100227.17	POLDIP3	17.6105	22.796	20.8705	11.6692	11.3234	15.0304	ENSG00000100227.17	POLDIP3	chr22:42583720-42614962	MB231_CTRL	MB231_W2	OK	20.4256	12.6743	-0.688471	-3.42554	5e-05	0.000503098	yes
ENSG00000100234.11	TIMP3	65.6475	73.4573	70.4222	43.2295	45.744	43.5768	ENSG00000100234.11	TIMP3	chr22:32512551-33058372	MB231_CTRL	MB231_W2	OK	69.8423	44.1834	-0.660596	-4.02086	5e-05	0.000503098	yes
ENSG00000100239.15	PPP6R2	3.90027	4.41986	3.49375	8.4847	6.83876	13.4925	ENSG00000100239.15	PPP6R2	chr22:50343303-50475024	MB231_CTRL	MB231_W2	OK	3.93796	9.60533	1.28639	1.96615	0.00025	0.00209262	yes
ENSG00000100243.20	CYB5R3	98.968	103.885	92.9622	65.1698	67.7956	71.7469	ENSG00000100243.20	CYB5R3	chr22:42617839-42649568	MB231_CTRL	MB231_W2	OK	98.605	68.2375	-0.531097	-3.13512	5e-05	0.000503098	yes
ENSG00000100266.18	PACSIN2	51.2299	50.2777	46.4296	27.8137	28.5886	20.8127	ENSG00000100266.18	PACSIN2	chr22:42796501-43015145	MB231_CTRL	MB231_W2	OK	49.3124	25.7383	-0.938032	-2.14501	0.00025	0.00209262	yes
ENSG00000100288.19	CHKB	5.28869	6.39681	3.16562	25.038	18.0761	26.2505	ENSG00000100288.19	CHKB	chr22:50568860-50613981	MB231_CTRL	MB231_W2	OK	4.95038	23.1215	2.22363	3.20811	5e-05	0.000503098	yes
ENSG00000100299.17	ARSA	4.59826	3.02649	4.50436	9.34359	9.04484	10.1931	ENSG00000100299.17	ARSA	chr22:50622753-50628173	MB231_CTRL	MB231_W2	OK	4.04303	9.52719	1.23661	1.99328	0.0002	0.00172918	yes
ENSG00000100302.6	RASD2	2.89372	2.16475	2.26476	1.75097	1.67098	1.21716	ENSG00000100302.6	RASD2	chr22:35540867-35554001	MB231_CTRL	MB231_W2	OK	2.44108	1.54637	-0.658633	-1.57874	0.0085	0.0391988	yes
ENSG00000100304.12	TTLL12	39.851	38.7699	30.2011	23.8313	26.5209	17.7102	ENSG00000100304.12	TTLL12	chr22:43166621-43187133	MB231_CTRL	MB231_W2	OK	36.274	22.6875	-0.677038	-2.08764	0.00085	0.00593698	yes
ENSG00000100320.22	RBFOX2	51.9303	51.0207	56.2841	35.2872	31.558	30.0647	ENSG00000100320.22	RBFOX2	chr22:35738735-36028425	MB231_CTRL	MB231_W2	OK	53.0783	32.3033	-0.716442	-2.70559	5e-05	0.000503098	yes
ENSG00000100342.20	APOL1	5.66473	5.31571	6.35445	3.20436	3.10994	3.07035	ENSG00000100342.20	APOL1	chr22:36253009-36267530	MB231_CTRL	MB231_W2	OK	5.7783	3.12822	-0.885303	-1.71548	5e-05	0.000503098	yes
ENSG00000100345.20	MYH9	282.942	310.621	373.085	129.478	172.637	135.499	ENSG00000100345.20	MYH9	chr22:36281280-36388018	MB231_CTRL	MB231_W2	OK	322.216	145.871	-1.14333	-1.85528	5e-05	0.000503098	yes
ENSG00000100348.9	TXN2	25.8486	28.2546	26.2599	17.516	24.3133	20.3893	ENSG00000100348.9	TXN2	chr22:36467035-36482030	MB231_CTRL	MB231_W2	OK	26.7877	20.7395	-0.369185	-1.74091	0.00255	0.014853	yes
ENSG00000100350.14	FOXRED2	9.72024	9.57042	10.8107	4.97469	11.0388	4.69691	ENSG00000100350.14	FOXRED2	chr22:36487189-36507101	MB231_CTRL	MB231_W2	OK	10.0338	6.90347	-0.539473	-1.47585	0.0098	0.0438526	yes
ENSG00000100353.17	EIF3D	132.323	133.162	138.16	83.3558	83.0713	80.588	ENSG00000100353.17	EIF3D	chr22:36510849-36529436	MB231_CTRL	MB231_W2	OK	134.548	82.3384	-0.708487	-3.23038	5e-05	0.000503098	yes
ENSG00000100376.11	FAM118A	3.3253	6.15058	3.51606	8.42521	5.44358	9.07441	ENSG00000100376.11	FAM118A	chr22:45308967-45341955	MB231_CTRL	MB231_W2	OK	4.33065	7.64773	0.82045	1.02736	0.0083	0.0384875	yes
ENSG00000100380.13	ST13	38.3365	42.1063	46.3416	23.6264	25.6323	28.1618	ENSG00000100380.13	ST13	chr22:40824534-40857022	MB231_CTRL	MB231_W2	OK	42.2615	25.8068	-0.711589	-3.91386	5e-05	0.000503098	yes
ENSG00000100410.7	PHF5A	23.7462	30.718	25.1465	31.1582	33.3293	37.5079	ENSG00000100410.7	PHF5A	chr22:41459716-41468725	MB231_CTRL	MB231_W2	OK	26.5369	33.9984	0.35747	1.43799	0.01	0.0445317	yes
ENSG00000100416.12	TRMU	23.3721	21.7765	21.8312	28.2143	29.1781	33.5113	ENSG00000100416.12	TRMU	chr22:46330874-46357340	MB231_CTRL	MB231_W2	OK	22.3266	30.3012	0.440612	1.7982	0.00105	0.00712483	yes
ENSG00000100422.13	CERK	16.5812	19.276	17.3488	11.0131	14.9741	14.8984	ENSG00000100422.13	CERK	chr22:46684410-46738261	MB231_CTRL	MB231_W2	OK	17.7354	13.6285	-0.38	-1.55337	0.00655	0.0317988	yes
ENSG00000100425.18	BRD1	7.15591	6.66905	8.63262	9.73019	11.8065	11.0429	ENSG00000100425.18	BRD1	chr22:49773282-49827512	MB231_CTRL	MB231_W2	OK	7.48586	10.8599	0.536766	1.36566	0.0089	0.0406178	yes
ENSG00000100426.6	ZBED4	6.80854	8.66805	8.90391	4.52978	7.09851	5.49345	ENSG00000100426.6	ZBED4	chr22:49853841-49890078	MB231_CTRL	MB231_W2	OK	8.12683	5.70725	-0.509898	-2.7943	5e-05	0.000503098	yes
ENSG00000100429.17	HDAC10	5.74652	6.72688	7.49382	16.8222	18.3495	20.7543	ENSG00000100429.17	HDAC10	chr22:50245182-50261825	MB231_CTRL	MB231_W2	OK	6.65574	18.642	1.48588	2.65277	5e-05	0.000503098	yes
ENSG00000100439.10	ABHD4	13.3922	15.2921	13.2808	5.41044	8.19566	6.34553	ENSG00000100439.10	ABHD4	chr14:22595807-22613215	MB231_CTRL	MB231_W2	OK	13.9884	6.65054	-1.07268	-1.36095	0.0024	0.0141469	yes
ENSG00000100441.9	KHNYN	9.61889	10.2603	9.56205	11.7001	16.3443	16.7256	ENSG00000100441.9	KHNYN	chr14:24426531-24442905	MB231_CTRL	MB231_W2	OK	9.81374	14.9233	0.604693	1.864	0.00085	0.00593698	yes
ENSG00000100479.12	POLE2	12.9183	13.809	14.3428	22.5349	19.6237	21.2093	ENSG00000100479.12	POLE2	chr14:49643554-49688422	MB231_CTRL	MB231_W2	OK	13.6901	21.1226	0.625662	1.8516	0.00015	0.00134259	yes
ENSG00000100483.13	VCPKMT	2.64074	5.97325	4.21992	5.67975	6.62891	8.85917	ENSG00000100483.13	VCPKMT	chr14:50108631-50116600	MB231_CTRL	MB231_W2	OK	4.27797	7.05595	0.721913	1.53722	0.00705	0.0337927	yes
ENSG00000100519.11	PSMC6	35.6463	41.259	39.322	66.5804	55.5918	53.7313	ENSG00000100519.11	PSMC6	chr14:52707171-52728587	MB231_CTRL	MB231_W2	OK	38.7425	58.6345	0.597835	2.40365	0.0001	0.000939965	yes
ENSG00000100526.19	CDKN3	111.087	107.316	116.988	197.785	220.925	217.52	ENSG00000100526.19	CDKN3	chr14:54396848-54420218	MB231_CTRL	MB231_W2	OK	111.797	212.077	0.923706	5.31838	5e-05	0.000503098	yes
ENSG00000100528.11	CNIH1	98.5972	99.5744	104.034	154.633	186.781	158.798	ENSG00000100528.11	CNIH1	chr14:54423559-54441431	MB231_CTRL	MB231_W2	OK	100.735	166.737	0.727009	3.14278	5e-05	0.000503098	yes
ENSG00000100532.11	CGRRF1	5.31912	5.51714	6.92063	15.2039	17.2598	13.6715	ENSG00000100532.11	CGRRF1	chr14:54509811-54539309	MB231_CTRL	MB231_W2	OK	5.91896	15.3784	1.37749	2.68416	5e-05	0.000503098	yes
ENSG00000100564.8	PIGH	7.58368	7.55306	6.90716	10.8758	13.8832	14.901	ENSG00000100564.8	PIGH	chr14:67447083-67600287	MB231_CTRL	MB231_W2	OK	7.34797	13.22	0.847306	1.4702	0.001	0.00683457	yes
ENSG00000100567.12	PSMA3	39.9317	51.8764	43.5632	68.0749	88.3824	73.4301	ENSG00000100567.12	PSMA3	chr14:57999734-58298139	MB231_CTRL	MB231_W2	OK	45.1238	76.6291	0.764005	2.21299	0.00025	0.00209262	yes
ENSG00000100575.13	TIMM9	22.4468	30.1508	27.2912	43.1461	48.0879	45.1303	ENSG00000100575.13	TIMM9	chr14:58395915-58551289	MB231_CTRL	MB231_W2	OK	26.6296	45.4548	0.771401	2.35345	0.00015	0.00134259	yes
ENSG00000100580.7	TMED8	10.091	10.7874	11.5179	8.32976	8.21047	8.11716	ENSG00000100580.7	TMED8	chr14:77335020-77391497	MB231_CTRL	MB231_W2	OK	10.7988	8.21913	-0.393812	-2.26232	5e-05	0.000503098	yes
ENSG00000100591.7	AHSA1	137.377	132.153	161.11	88.018	76.4314	78.7131	ENSG00000100591.7	AHSA1	chr14:77426674-77469474	MB231_CTRL	MB231_W2	OK	143.547	81.0542	-0.824563	-2.97316	5e-05	0.000503098	yes
ENSG00000100599.15	RIN3	31.4581	33.8597	26.8722	18.276	20.168	21.408	ENSG00000100599.15	RIN3	chr14:92513773-92688994	MB231_CTRL	MB231_W2	OK	30.73	19.9507	-0.623211	-1.38708	0.0094	0.0424543	yes
ENSG00000100600.14	LGMN	21.3254	23.8373	22.5181	11.3774	13.1076	13.8276	ENSG00000100600.14	LGMN	chr14:92703806-92748702	MB231_CTRL	MB231_W2	OK	22.5603	12.7708	-0.82093	-1.68596	0.0013	0.00851582	yes
ENSG00000100603.13	SNW1	50.317	60.418	68.7561	42.0106	39.7942	41.5996	ENSG00000100603.13	SNW1	chr14:77708070-77769742	MB231_CTRL	MB231_W2	OK	59.8304	41.1348	-0.540519	-1.60569	0.00535	0.0271868	yes
ENSG00000100628.11	ASB2	4.85981	7.74923	6.87778	9.0318	11.0167	11.7633	ENSG00000100628.11	ASB2	chr14:93934152-93976791	MB231_CTRL	MB231_W2	OK	6.4956	10.6039	0.707063	1.93037	5e-05	0.000503098	yes
ENSG00000100629.16	CEP128	4.38428	5.53152	7.77865	7.34917	10.1269	11.5313	ENSG00000100629.16	CEP128	chr14:80476982-81170414	MB231_CTRL	MB231_W2	OK	5.89815	9.66912	0.713121	1.32059	0.0037	0.0200658	yes
ENSG00000100632.10	ERH	181.556	175.936	164.988	220.771	253.047	243.228	ENSG00000100632.10	ERH	chr14:69380122-69462388	MB231_CTRL	MB231_W2	OK	174.16	239.015	0.45669	1.88176	0.0007	0.00502945	yes
ENSG00000100644.16	HIF1A	146.428	141.509	153.728	95.8015	101.955	100.027	ENSG00000100644.16	HIF1A	chr14:61681040-61796428	MB231_CTRL	MB231_W2	OK	147.221	99.2611	-0.568689	-1.92421	0.0011	0.00740172	yes
ENSG00000100650.15	SRSF5	79.9091	83.3316	85.4805	138.598	147.166	155.011	ENSG00000100650.15	SRSF5	chr14:69726899-69772005	MB231_CTRL	MB231_W2	OK	82.9071	146.925	0.825511	3.81319	5e-05	0.000503098	yes
ENSG00000100726.14	TELO2	6.05474	5.37629	9.1827	15.052	20.1445	17.2794	ENSG00000100726.14	TELO2	chr16:1493343-1612110	MB231_CTRL	MB231_W2	OK	6.87124	17.492	1.34805	2.46936	5e-05	0.000503098	yes
ENSG00000100764.13	PSMC1	18.5801	22.6398	20.7778	9.58087	12.2381	12.3751	ENSG00000100764.13	PSMC1	chr14:90256494-90332137	MB231_CTRL	MB231_W2	OK	20.6659	11.398	-0.85847	-2.84049	5e-05	0.000503098	yes
ENSG00000100796.17	PPP4R3A	61.668	68.8409	70.2916	41.5505	52.3988	40.4344	ENSG00000100796.17	PPP4R3A	chr14:91457610-91510554	MB231_CTRL	MB231_W2	OK	66.9335	44.7946	-0.579404	-1.74306	0.00155	0.00984337	yes
ENSG00000100804.18	PSMB5	73.5377	81.1396	78.08	53.5085	59.9127	62.562	ENSG00000100804.18	PSMB5	chr14:23016542-23035230	MB231_CTRL	MB231_W2	OK	77.5858	58.6611	-0.403388	-2.19872	0.0003	0.00245627	yes
ENSG00000100813.14	ACIN1	26.8315	31.9936	39.032	58.1843	63.6446	58.9795	ENSG00000100813.14	ACIN1	chr14:23058563-23104992	MB231_CTRL	MB231_W2	OK	32.619	60.2695	0.885713	2.1374	0.0003	0.00245627	yes
ENSG00000100814.17	CCNB1IP1	11.8323	13.9351	11.6306	31.1189	29.8735	25.7312	ENSG00000100814.17	CCNB1IP1	chr14:20311367-20333312	MB231_CTRL	MB231_W2	OK	12.466	28.9078	1.21346	3.57395	5e-05	0.000503098	yes
ENSG00000100852.12	ARHGAP5	72.4712	75.2953	80.3891	54.0646	54.3091	53.782	ENSG00000100852.12	ARHGAP5	chr14:32074945-32159728	MB231_CTRL	MB231_W2	OK	76.0518	54.0519	-0.492639	-2.21629	0.00025	0.00209262	yes
ENSG00000100902.10	PSMA6	178.559	168.548	190.13	225.402	313.438	280.774	ENSG00000100902.10	PSMA6	chr14:35044906-35317493	MB231_CTRL	MB231_W2	OK	179.079	273.204	0.609384	2.03699	0.0003	0.00245627	yes
ENSG00000100911.14	PSME2	39.1951	45.877	49.7496	66.8879	66.462	65.9566	ENSG00000100911.14	PSME2	chr14:24143361-24167402	MB231_CTRL	MB231_W2	OK	44.9406	66.4355	0.563935	1.56489	0.0049	0.0253321	yes
ENSG00000100918.12	REC8	0.834124	0.277108	1.04029	4.62015	5.50278	1.12418	ENSG00000100918.12	REC8	chr14:24171852-24239242	MB231_CTRL	MB231_W2	OK	0.717172	3.74904	2.38613	0.598518	0.0038	0.0205228	yes
ENSG00000100934.14	SEC23A	37.7196	39.649	47.4283	30.8647	26.7029	27.7602	ENSG00000100934.14	SEC23A	chr14:39031918-39109646	MB231_CTRL	MB231_W2	OK	41.599	28.4426	-0.548494	-1.67245	0.0064	0.031255	yes
ENSG00000100941.8	PNN	25.1851	31.832	33.3424	61.2144	58.7539	74.1554	ENSG00000100941.8	PNN	chr14:39174884-39183218	MB231_CTRL	MB231_W2	OK	30.1198	64.7079	1.10323	3.37647	5e-05	0.000503098	yes
ENSG00000100949.14	RABGGTA	11.2371	8.89243	14.251	18.2755	15.5145	22.7079	ENSG00000100949.14	RABGGTA	chr14:24265537-24271739	MB231_CTRL	MB231_W2	OK	11.4602	18.8326	0.716605	1.75638	0.00055	0.0041207	yes
ENSG00000100983.9	GSS	44.9806	52.0078	47.7947	33.8783	34.3528	33.845	ENSG00000100983.9	GSS	chr20:34928429-34955817	MB231_CTRL	MB231_W2	OK	48.261	34.0254	-0.504247	-3.11981	5e-05	0.000503098	yes
ENSG00000100991.11	TRPC4AP	37.1478	42.4864	38.4251	27.5012	32.862	31.8731	ENSG00000100991.11	TRPC4AP	chr20:34975402-35092871	MB231_CTRL	MB231_W2	OK	39.3531	30.7454	-0.356104	-2.30949	5e-05	0.000503098	yes
ENSG00000100994.11	PYGB	37.5948	40.3693	38.5078	22.5263	24.5949	19.5364	ENSG00000100994.11	PYGB	chr20:25248068-25390983	MB231_CTRL	MB231_W2	OK	38.824	22.2192	-0.805141	-3.45515	5e-05	0.000503098	yes
ENSG00000101003.9	GINS1	20.3588	18.6904	21.8159	27.7681	24.7415	26.928	ENSG00000101003.9	GINS1	chr20:25407726-25452628	MB231_CTRL	MB231_W2	OK	20.2884	26.4792	0.384209	1.75993	0.0015	0.00960482	yes
ENSG00000101004.14	NINL	1.26596	1.65239	1.39657	1.85668	2.89538	3.93768	ENSG00000101004.14	NINL	chr20:25452704-25585517	MB231_CTRL	MB231_W2	OK	1.4383	2.89658	1.00998	1.43979	0.00075	0.00534003	yes
ENSG00000101079.20	NDRG3	30.9908	30.7453	30.3184	19.2104	17.2204	17.4737	ENSG00000101079.20	NDRG3	chr20:36651765-36746078	MB231_CTRL	MB231_W2	OK	30.6848	17.9682	-0.77208	-4.05332	5e-05	0.000503098	yes
ENSG00000101104.12	PABPC1L	1.84149	2.44234	2.57704	26.6814	32.0695	40.2646	ENSG00000101104.12	PABPC1L	chr20:44910061-44960486	MB231_CTRL	MB231_W2	OK	2.28696	33.0052	3.85119	3.80873	5e-05	0.000503098	yes
ENSG00000101126.15	ADNP	30.8706	35.2875	36.4267	24.2572	25.6901	27.9973	ENSG00000101126.15	ADNP	chr20:50888918-50958555	MB231_CTRL	MB231_W2	OK	34.1949	25.9815	-0.396296	-1.60371	0.0074	0.0351233	yes
ENSG00000101132.9	PFDN4	19.3688	18.0719	21.7883	26.8703	40.7888	35.0803	ENSG00000101132.9	PFDN4	chr20:54207846-54228052	MB231_CTRL	MB231_W2	OK	19.743	34.2465	0.794616	3.08061	5e-05	0.000503098	yes
ENSG00000101150.17	TPD52L2	86.3171	91.7331	91.5316	61.7314	73.1093	69.1105	ENSG00000101150.17	TPD52L2	chr20:63865227-63891545	MB231_CTRL	MB231_W2	OK	89.8606	67.9837	-0.402499	-2.39381	5e-05	0.000503098	yes
ENSG00000101152.10	DNAJC5	42.1869	48.5693	44.0493	26.0339	31.8367	30.4118	ENSG00000101152.10	DNAJC5	chr20:63895181-63936031	MB231_CTRL	MB231_W2	OK	44.9352	29.4274	-0.610683	-3.80832	5e-05	0.000503098	yes
ENSG00000101158.13	NELFCD	41.3829	39.7205	45.3621	64.7077	55.5929	64.8846	ENSG00000101158.13	NELFCD	chr20:58981207-58995133	MB231_CTRL	MB231_W2	OK	42.1552	61.7284	0.550225	2.32799	5e-05	0.000503098	yes
ENSG00000101160.13	CTSZ	133.916	138.779	127.882	81.8425	73.8963	87.5392	ENSG00000101160.13	CTSZ	chr20:58995184-59007247	MB231_CTRL	MB231_W2	OK	133.526	81.0927	-0.719476	-4.24185	5e-05	0.000503098	yes
ENSG00000101161.7	PRPF6	17.5392	20.7043	19.4239	12.7952	13.3678	13.6276	ENSG00000101161.7	PRPF6	chr20:63981134-64033100	MB231_CTRL	MB231_W2	OK	19.2225	13.2635	-0.535329	-3.40641	5e-05	0.000503098	yes
ENSG00000101166.15	PRELID3B	67.3354	74.8043	72.8886	89.189	96.2313	90.1452	ENSG00000101166.15	PRELID3B	chr20:59033144-59042909	MB231_CTRL	MB231_W2	OK	71.6761	91.8552	0.357869	1.94558	0.001	0.00683457	yes
ENSG00000101187.15	SLCO4A1	14.2089	18.7832	19.0458	33.6205	24.4612	46.5252	ENSG00000101187.15	SLCO4A1	chr20:62640718-62685785	MB231_CTRL	MB231_W2	OK	17.346	34.869	1.00735	2.73327	5e-05	0.000503098	yes
ENSG00000101194.17	SLC17A9	14.6785	14.8879	15.062	24.9425	24.7517	33.692	ENSG00000101194.17	SLC17A9	chr20:62952646-62969585	MB231_CTRL	MB231_W2	OK	14.8761	27.7954	0.901845	2.52034	5e-05	0.000503098	yes
ENSG00000101199.12	ARFGAP1	19.8202	21.3154	19.818	33.3028	48.4699	41.1742	ENSG00000101199.12	ARFGAP1	chr20:63272784-63289793	MB231_CTRL	MB231_W2	OK	20.3179	40.9823	1.01225	3.98592	5e-05	0.000503098	yes
ENSG00000101210.10	EEF1A2	11.068	14.2573	11.9027	6.87104	6.47817	8.5209	ENSG00000101210.10	EEF1A2	chr20:63488012-63499315	MB231_CTRL	MB231_W2	OK	12.4093	7.29004	-0.767429	-3.35864	5e-05	0.000503098	yes
ENSG00000101220.17	C20orf27	40.5349	46.3568	36.167	25.4167	30.5841	27.0717	ENSG00000101220.17	C20orf27	chr20:3753507-3768387	MB231_CTRL	MB231_W2	OK	41.0196	27.6908	-0.566904	-2.50165	5e-05	0.000503098	yes
ENSG00000101247.17	NDUFAF5	9.55005	8.06457	8.23977	14.9282	22.4953	23.97	ENSG00000101247.17	NDUFAF5	chr20:13784949-13821582	MB231_CTRL	MB231_W2	OK	8.61813	20.4645	1.24768	2.60574	5e-05	0.000503098	yes
ENSG00000101266.17	CSNK2A1	48.2247	54.5436	50.4838	38.55	33.928	43.6466	ENSG00000101266.17	CSNK2A1	chr20:473590-543821	MB231_CTRL	MB231_W2	OK	51.084	38.7082	-0.400233	-1.85455	0.00155	0.00984337	yes
ENSG00000101310.14	SEC23B	13.8041	18.5073	17.077	12.6864	9.7496	12.3628	ENSG00000101310.14	SEC23B	chr20:18507492-18561415	MB231_CTRL	MB231_W2	OK	16.4628	11.5996	-0.505135	-1.71697	0.0013	0.00851582	yes
ENSG00000101311.15	FERMT1	4.3946	7.02848	5.28504	3.12455	4.24866	3.51906	ENSG00000101311.15	FERMT1	chr20:6074844-6123544	MB231_CTRL	MB231_W2	OK	5.56937	3.63076	-0.617245	-1.57267	0.0031	0.0173617	yes
ENSG00000101335.9	MYL9	43.8102	48.2486	43.0003	31.0075	32.4991	27.6614	ENSG00000101335.9	MYL9	chr20:36306335-36573391	MB231_CTRL	MB231_W2	OK	45.0197	30.3893	-0.566991	-1.76417	0.00315	0.0175845	yes
ENSG00000101337.15	TM9SF4	22.6067	22.0356	23.9208	15.6301	17.9683	13.9894	ENSG00000101337.15	TM9SF4	chr20:32109505-32167258	MB231_CTRL	MB231_W2	OK	22.8544	15.8626	-0.52684	-1.71725	0.0033	0.0182709	yes
ENSG00000101343.14	CRNKL1	17.9863	17.5385	19.6866	13.4732	10.8916	11.7297	ENSG00000101343.14	CRNKL1	chr20:20034367-20360702	MB231_CTRL	MB231_W2	OK	18.4038	12.0315	-0.613189	-2.65014	5e-05	0.000503098	yes
ENSG00000101346.12	POFUT1	41.2347	49.3422	45.7055	29.192	35.4217	33.671	ENSG00000101346.12	POFUT1	chr20:32207879-32238667	MB231_CTRL	MB231_W2	OK	45.4275	32.7616	-0.47156	-1.64789	0.002	0.0121525	yes
ENSG00000101347.8	SAMHD1	21.9553	22.8015	25.0335	10.3312	11.6386	10.4851	ENSG00000101347.8	SAMHD1	chr20:36876120-36951843	MB231_CTRL	MB231_W2	OK	23.2634	10.8183	-1.10459	-5.49649	5e-05	0.000503098	yes
ENSG00000101350.7	KIF3B	11.135	13.1011	13.2225	9.28849	8.33426	8.58867	ENSG00000101350.7	KIF3B	chr20:32277663-32335011	MB231_CTRL	MB231_W2	OK	12.4862	8.73714	-0.515101	-3.30598	5e-05	0.000503098	yes
ENSG00000101361.15	NOP56	116.131	121.049	125.682	230.569	270.22	251.442	ENSG00000101361.15	NOP56	chr20:2652144-2658393	MB231_CTRL	MB231_W2	OK	120.954	250.744	1.05176	4.75339	5e-05	0.000503098	yes
ENSG00000101367.8	MAPRE1	113.288	119.432	115.263	73.9198	91.2016	85.5545	ENSG00000101367.8	MAPRE1	chr20:32819892-32854257	MB231_CTRL	MB231_W2	OK	115.994	83.5586	-0.473188	-2.88942	5e-05	0.000503098	yes
ENSG00000101391.20	CDK5RAP1	14.8214	24.8114	19.429	30.816	38.716	34.1081	ENSG00000101391.20	CDK5RAP1	chr20:33358838-33401561	MB231_CTRL	MB231_W2	OK	19.6873	34.5467	0.811283	2.63794	5e-05	0.000503098	yes
ENSG00000101400.5	SNTA1	13.3828	15.8526	14.1344	9.92886	9.56153	11.0557	ENSG00000101400.5	SNTA1	chr20:33407954-33443892	MB231_CTRL	MB231_W2	OK	14.4566	10.182	-0.505704	-2.25073	0.0002	0.00172918	yes
ENSG00000101421.3	CHMP4B	70.4269	72.1751	73.2535	40.3779	44.1389	44.0729	ENSG00000101421.3	CHMP4B	chr20:33811303-33854366	MB231_CTRL	MB231_W2	OK	71.9518	42.8632	-0.747291	-4.64907	5e-05	0.000503098	yes
ENSG00000101444.12	AHCY	100.109	106.76	97.5735	63.6624	80.6614	72.9955	ENSG00000101444.12	AHCY	chr20:34194568-34311802	MB231_CTRL	MB231_W2	OK	101.481	72.4397	-0.486353	-2.6278	5e-05	0.000503098	yes
ENSG00000101452.14	DHX35	4.7365	4.88439	5.65958	5.95798	8.48877	6.67817	ENSG00000101452.14	DHX35	chr20:38962298-39039723	MB231_CTRL	MB231_W2	OK	5.09349	7.04164	0.467258	1.42911	0.006	0.0297391	yes
ENSG00000101474.11	APMAP	78.1992	87.8429	85.4289	44.4088	49.6268	47.9719	ENSG00000101474.11	APMAP	chr20:24962924-24992979	MB231_CTRL	MB231_W2	OK	83.8237	47.3358	-0.824425	-5.03769	5e-05	0.000503098	yes
ENSG00000101557.14	USP14	39.8799	40.2705	42.7889	29.7296	26.4017	27.3688	ENSG00000101557.14	USP14	chr18:158382-268050	MB231_CTRL	MB231_W2	OK	40.9798	27.8333	-0.558098	-2.02193	0.00065	0.00473038	yes
ENSG00000101574.14	METTL4	14.249	14.7709	13.3663	20.9994	25.7325	17.8422	ENSG00000101574.14	METTL4	chr18:2537524-2571509	MB231_CTRL	MB231_W2	OK	14.1288	21.5247	0.607357	1.44	0.0106	0.0466058	yes
ENSG00000101577.9	LPIN2	16.9366	19.6705	20.6772	16.156	12.2231	15.2372	ENSG00000101577.9	LPIN2	chr18:2916993-3013315	MB231_CTRL	MB231_W2	OK	19.0948	14.5388	-0.393272	-1.43455	0.0104	0.0458917	yes
ENSG00000101670.11	LIPG	2.63267	3.26704	2.22141	1.31778	1.6184	1.0891	ENSG00000101670.11	LIPG	chr18:49560698-49599182	MB231_CTRL	MB231_W2	OK	2.70704	1.34176	-1.01259	-1.16264	0.0081	0.0377731	yes
ENSG00000101751.10	POLI	3.21909	2.51042	3.31518	6.14075	7.32759	6.57856	ENSG00000101751.10	POLI	chr18:54268345-54321266	MB231_CTRL	MB231_W2	OK	3.0149	6.6823	1.14824	1.50146	0.0003	0.00245627	yes
ENSG00000101752.11	MIB1	16.4733	18.6599	21.7163	9.10669	10.8953	9.77509	ENSG00000101752.11	MIB1	chr18:21704956-21870957	MB231_CTRL	MB231_W2	OK	18.9498	9.92571	-0.932943	-5.05786	5e-05	0.000503098	yes
ENSG00000101773.17	RBBP8	51.1172	18.8972	19.8242	18.0777	22.669	19.2016	ENSG00000101773.17	RBBP8	chr18:22699480-23026488	MB231_CTRL	MB231_W2	OK	29.9462	19.9827	-0.583618	-1.76732	0.00295	0.0166971	yes
ENSG00000101846.6	STS	12.8769	15.2442	14.555	4.94246	6.31459	5.5068	ENSG00000101846.6	STS	chrX:7219455-7354810	MB231_CTRL	MB231_W2	OK	14.2254	5.58795	-1.34808	-7.46151	5e-05	0.000503098	yes
ENSG00000101849.15	TBL1X	19.8517	23.2994	21.6069	9.41458	10.4041	10.0966	ENSG00000101849.15	TBL1X	chrX:9463294-9719743	MB231_CTRL	MB231_W2	OK	21.586	9.97179	-1.11417	-4.17195	5e-05	0.000503098	yes
ENSG00000101868.10	POLA1	10.8227	13.0055	11.8326	5.10225	4.53426	4.96735	ENSG00000101868.10	POLA1	chrX:24693918-24996986	MB231_CTRL	MB231_W2	OK	11.8869	4.86795	-1.28799	-2.76013	5e-05	0.000503098	yes
ENSG00000101901.11	ALG13	17.4632	17.8764	19.8208	40.7348	32.6298	109.497	ENSG00000101901.11	ALG13	chrX:111665810-111760649	MB231_CTRL	MB231_W2	OK	18.3868	60.9539	1.72905	3.43625	5e-05	0.000503098	yes
ENSG00000101911.12	PRPS2	79.7774	74.6909	72.223	38.6149	47.1734	40.7107	ENSG00000101911.12	PRPS2	chrX:12791354-12824222	MB231_CTRL	MB231_W2	OK	75.5638	42.1663	-0.841603	-2.81734	5e-05	0.000503098	yes
ENSG00000101928.12	MOSPD1	8.89227	13.4863	11.7592	16.9244	18.1689	22.3105	ENSG00000101928.12	MOSPD1	chrX:134887625-134915267	MB231_CTRL	MB231_W2	OK	11.3793	19.1346	0.749777	2.19849	0.00035	0.00280437	yes
ENSG00000101938.14	CHRDL1	0.380532	0.535647	0.193431	1.8861	1.54604	2.37984	ENSG00000101938.14	CHRDL1	chrX:110673855-110795819	MB231_CTRL	MB231_W2	OK	0.36987	1.93733	2.38898	2.57476	5e-05	0.000503098	yes
ENSG00000101955.14	SRPX	24.3511	25.0956	28.1932	9.54514	10.0475	9.06985	ENSG00000101955.14	SRPX	chrX:37349274-38688920	MB231_CTRL	MB231_W2	OK	25.88	9.55415	-1.43764	-3.43516	5e-05	0.000503098	yes
ENSG00000102007.10	PLP2	348.236	363.962	352.305	261.773	241.619	222.548	ENSG00000102007.10	PLP2	chrX:49171925-49175239	MB231_CTRL	MB231_W2	OK	354.835	241.98	-0.552258	-3.39137	5e-05	0.000503098	yes
ENSG00000102024.17	PLS3	67.2116	63.2772	67.0879	46.656	48.5901	41.1907	ENSG00000102024.17	PLS3	chrX:115518181-115650861	MB231_CTRL	MB231_W2	OK	65.8589	45.4789	-0.53418	-2.01819	0.0006	0.00442867	yes
ENSG00000102030.15	NAA10	32.919	23.7959	27.721	36.2161	62.3206	51.9582	ENSG00000102030.15	NAA10	chrX:153861513-153935223	MB231_CTRL	MB231_W2	OK	28.1453	50.165	0.833784	1.70591	0.0039	0.020982	yes
ENSG00000102038.15	SMARCA1	22.3463	23.7105	25.3292	16.1227	15.8872	16.8819	ENSG00000102038.15	SMARCA1	chrX:129446500-129523500	MB231_CTRL	MB231_W2	OK	23.7953	16.2973	-0.546048	-3.29319	5e-05	0.000503098	yes
ENSG00000102054.17	RBBP7	104.867	117.53	125.849	74.2361	80.1463	84.1024	ENSG00000102054.17	RBBP7	chrX:16786426-16870414	MB231_CTRL	MB231_W2	OK	116.082	79.495	-0.54621	-2.19351	5e-05	0.000503098	yes
ENSG00000102078.15	SLC25A14	2.12266	2.80449	3.47381	5.09089	6.18546	5.11842	ENSG00000102078.15	SLC25A14	chrX:130339887-130373361	MB231_CTRL	MB231_W2	OK	2.80032	5.46492	0.964609	1.01366	0.0063	0.0308862	yes
ENSG00000102081.13	FMR1	13.6733	14.0903	16.0498	19.9111	23.2414	20.0949	ENSG00000102081.13	FMR1	chrX:147911950-147951125	MB231_CTRL	MB231_W2	OK	14.6045	21.0824	0.529633	1.64347	0.00345	0.018982	yes
ENSG00000102100.15	SLC35A2	24.2542	33.9128	25.6709	12.3497	16.845	21.1637	ENSG00000102100.15	SLC35A2	chrX:48903179-48911958	MB231_CTRL	MB231_W2	OK	27.946	16.7861	-0.735371	-1.70008	0.0018	0.0111376	yes
ENSG00000102119.10	EMD	27.5356	26.1625	33.8822	44.4926	41.5411	53.903	ENSG00000102119.10	EMD	chrX:154379196-154381523	MB231_CTRL	MB231_W2	OK	29.1934	46.6455	0.676096	2.94117	5e-05	0.000503098	yes
ENSG00000102125.15	TAZ	5.4191	3.76406	4.4691	11.8701	10.2174	9.66249	ENSG00000102125.15	TAZ	chrX:154389954-154421726	MB231_CTRL	MB231_W2	OK	4.55076	10.5833	1.21761	1.06241	0.0053	0.026998	yes
ENSG00000102172.15	SMS	122.37	132.519	136.018	80.1253	83.1787	83.0092	ENSG00000102172.15	SMS	chrX:21940572-21994835	MB231_CTRL	MB231_W2	OK	130.302	82.1044	-0.666328	-4.04744	5e-05	0.000503098	yes
ENSG00000102218.5	RP2	22.6749	24.8836	28.3119	17.0361	20.1517	19.0559	ENSG00000102218.5	RP2	chrX:46836939-46882358	MB231_CTRL	MB231_W2	OK	25.2901	18.7479	-0.431844	-2.40833	5e-05	0.000503098	yes
ENSG00000102265.11	TIMP1	311.755	290.275	275.294	138.859	194.041	146.613	ENSG00000102265.11	TIMP1	chrX:47561099-47619853	MB231_CTRL	MB231_W2	OK	292.441	159.838	-0.871541	-3.27627	5e-05	0.000503098	yes
ENSG00000102271.13	KLHL4	14.0244	16.4316	17.1957	4.33492	5.4075	6.68665	ENSG00000102271.13	KLHL4	chrX:87517748-87670050	MB231_CTRL	MB231_W2	OK	15.8839	5.47635	-1.53628	-6.4641	5e-05	0.000503098	yes
ENSG00000102287.17	GABRE	2.50476	2.40579	2.64235	27.5572	23.0627	24.1791	ENSG00000102287.17	GABRE	chrX:151953123-151974680	MB231_CTRL	MB231_W2	OK	2.51763	24.933	3.30792	1.59706	5e-05	0.000503098	yes
ENSG00000102362.15	SYTL4	4.48061	2.12836	4.85471	12.4207	4.87959	10.6911	ENSG00000102362.15	SYTL4	chrX:100674490-100732123	MB231_CTRL	MB231_W2	OK	3.82123	9.33046	1.28791	1.67785	0.0015	0.00960482	yes
ENSG00000102384.13	CENPI	15.0822	11.4539	11.7239	24.9591	25.3744	23.092	ENSG00000102384.13	CENPI	chrX:101098217-101163681	MB231_CTRL	MB231_W2	OK	12.7533	24.4751	0.940445	1.96524	0.0008	0.00564084	yes
ENSG00000102390.10	PBDC1	15.4002	17.0501	23.4859	9.5159	9.11012	12.6447	ENSG00000102390.10	PBDC1	chrX:76172935-76178204	MB231_CTRL	MB231_W2	OK	18.6454	10.4236	-0.838972	-4.64827	5e-05	0.000503098	yes
ENSG00000102471.13	NDFIP2	19.5198	18.966	20.1203	32.1345	39.0375	37.1311	ENSG00000102471.13	NDFIP2	chr13:79477363-79556075	MB231_CTRL	MB231_W2	OK	19.5354	36.101	0.885952	3.70191	5e-05	0.000503098	yes
ENSG00000102531.16	FNDC3A	8.62207	9.73652	10.1307	7.65573	7.46776	7.07592	ENSG00000102531.16	FNDC3A	chr13:48974966-49209779	MB231_CTRL	MB231_W2	OK	9.49641	7.3998	-0.359896	-1.70181	0.00215	0.0128963	yes
ENSG00000102554.13	KLF5	29.3619	32.4547	25.5885	12.5331	20.105	15.5001	ENSG00000102554.13	KLF5	chr13:73054975-73077542	MB231_CTRL	MB231_W2	OK	29.135	16.0461	-0.860537	-2.55528	5e-05	0.000503098	yes
ENSG00000102580.14	DNAJC3	12.0739	14.1664	14.6922	10.2478	9.11529	10.9754	ENSG00000102580.14	DNAJC3	chr13:95677138-95794989	MB231_CTRL	MB231_W2	OK	13.6442	10.1128	-0.432102	-2.52207	5e-05	0.000503098	yes
ENSG00000102606.17	ARHGEF7	13.0921	17.911	23.9649	28.0452	33.6638	27.6278	ENSG00000102606.17	ARHGEF7	chr13:111113811-111305737	MB231_CTRL	MB231_W2	OK	18.3227	29.7789	0.700662	1.4415	0.011	0.0479798	yes
ENSG00000102699.5	PARP4	38.1384	45.1498	44.5387	25.7985	30.095	28.6583	ENSG00000102699.5	PARP4	chr13:24408156-24597676	MB231_CTRL	MB231_W2	OK	42.6089	28.1839	-0.596283	-2.89485	5e-05	0.000503098	yes
ENSG00000102753.9	KPNA3	24.0415	26.5155	26.4623	20.7529	18.8149	21.1464	ENSG00000102753.9	KPNA3	chr13:49699306-49793307	MB231_CTRL	MB231_W2	OK	25.6731	20.2381	-0.343186	-1.68402	0.0049	0.0253321	yes
ENSG00000102786.14	INTS6	10.1178	11.3387	10.6495	15.6656	15.6461	15.8658	ENSG00000102786.14	INTS6	chr13:51335772-51552364	MB231_CTRL	MB231_W2	OK	10.702	15.7258	0.555252	1.22059	0.00625	0.0307207	yes
ENSG00000102854.15	MSLN	4.62045	4.39101	4.93061	7.89105	7.85184	8.99945	ENSG00000102854.15	MSLN	chr16:760761-768865	MB231_CTRL	MB231_W2	OK	4.64736	8.24744	0.827537	1.63041	0.00195	0.0118792	yes
ENSG00000102878.16	HSF4	0.668925	2.17684	0	9.01845	8.56986	10.9788	ENSG00000102878.16	HSF4	chr16:67154179-67169945	MB231_CTRL	MB231_W2	OK	0.948587	9.52236	3.32747	1.09281	5e-05	0.000503098	yes
ENSG00000102893.15	PHKB	10.8371	13.2564	11.7706	19.8567	22.0844	32.8788	ENSG00000102893.15	PHKB	chr16:47144322-47701523	MB231_CTRL	MB231_W2	OK	11.9547	24.94	1.06088	1.98959	0.0002	0.00172918	yes
ENSG00000102901.12	CENPT	8.90935	10.1351	11.1392	23.6219	26.0625	36.0464	ENSG00000102901.12	CENPT	chr16:67806764-67872567	MB231_CTRL	MB231_W2	OK	10.0612	28.577	1.50605	2.69257	5e-05	0.000503098	yes
ENSG00000102908.20	NFAT5	12.8564	13.7693	14.9402	16.7982	18.2347	20.9033	ENSG00000102908.20	NFAT5	chr16:69565093-69704666	MB231_CTRL	MB231_W2	OK	13.8553	18.6454	0.428377	1.5452	0.0063	0.0308862	yes
ENSG00000102974.14	CTCF	11.0336	12.7194	12.6414	6.58961	7.83161	8.78285	ENSG00000102974.14	CTCF	chr16:67549213-67639183	MB231_CTRL	MB231_W2	OK	12.1315	7.73469	-0.649337	-2.88149	5e-05	0.000503098	yes
ENSG00000102996.4	MMP15	4.56222	6.4597	4.83851	2.67347	2.27109	3.6137	ENSG00000102996.4	MMP15	chr16:58025565-58046901	MB231_CTRL	MB231_W2	OK	5.28681	2.85275	-0.890043	-2.05391	0.00015	0.00134259	yes
ENSG00000103018.16	CYB5B	51.5441	52.445	56.1338	32.4709	44.0959	44.5154	ENSG00000103018.16	CYB5B	chr16:69424524-69466266	MB231_CTRL	MB231_W2	OK	53.3743	40.3607	-0.403194	-1.66921	0.0039	0.020982	yes
ENSG00000103042.8	SLC38A7	4.60237	6.83261	5.9855	7.32605	8.99941	11.9913	ENSG00000103042.8	SLC38A7	chr16:58665108-58685104	MB231_CTRL	MB231_W2	OK	5.80683	9.43892	0.700871	1.3095	0.0059	0.0293549	yes
ENSG00000103064.13	SLC7A6	17.6806	16.0401	12.7833	32.0574	26.6159	31.0718	ENSG00000103064.13	SLC7A6	chr16:68264515-68310946	MB231_CTRL	MB231_W2	OK	15.5013	29.915	0.948478	1.73719	0.0007	0.00502945	yes
ENSG00000103066.12	PLA2G15	9.44449	9.99953	12.2287	5.39932	6.11348	8.37199	ENSG00000103066.12	PLA2G15	chr16:68245303-68261062	MB231_CTRL	MB231_W2	OK	10.5576	6.62826	-0.671575	-1.18936	0.01005	0.0446965	yes
ENSG00000103091.14	WDR59	3.56858	5.24241	7.35537	9.98014	9.64246	15.7075	ENSG00000103091.14	WDR59	chr16:74871366-75110994	MB231_CTRL	MB231_W2	OK	5.38879	11.7767	1.1279	1.21545	0.00325	0.018039	yes
ENSG00000103121.8	CMC2	51.0461	51.7729	60.7175	97.8054	99.0551	123.997	ENSG00000103121.8	CMC2	chr16:80966447-81035759	MB231_CTRL	MB231_W2	OK	54.5121	106.952	0.972319	3.06004	5e-05	0.000503098	yes
ENSG00000103168.16	TAF1C	7.51894	7.45019	5.33542	19.2785	23.1772	18.2363	ENSG00000103168.16	TAF1C	chr16:84145286-84187070	MB231_CTRL	MB231_W2	OK	6.76818	20.2307	1.5797	2.66794	5e-05	0.000503098	yes
ENSG00000103197.16	TSC2	11.9114	15.376	14.5291	23.4253	25.8233	34.079	ENSG00000103197.16	TSC2	chr16:2039814-2135898	MB231_CTRL	MB231_W2	OK	13.9388	27.7759	0.994722	2.07881	0.0001	0.000939965	yes
ENSG00000103226.17	NOMO3	2.10461	2.36736	2.48473	1.51362	0.933683	0.621665	ENSG00000103226.17	NOMO3	chr16:16232494-16294814	MB231_CTRL	MB231_W2	OK	2.3189	1.02299	-1.18065	-0.570231	0.0055	0.0277775	yes
ENSG00000103257.8	SLC7A5	90.3442	99.2744	87.4	65.928	80.2077	83.0893	ENSG00000103257.8	SLC7A5	chr16:87830022-87869488	MB231_CTRL	MB231_W2	OK	92.3396	76.4083	-0.273219	-1.49763	0.0116	0.0499123	yes
ENSG00000103275.19	UBE2I	40.5336	33.322	30.2119	48.5734	54.3046	51.4588	ENSG00000103275.19	UBE2I	chr16:1305546-1327018	MB231_CTRL	MB231_W2	OK	34.6891	51.4456	0.568564	1.75718	0.0011	0.00740172	yes
ENSG00000103335.20	PIEZO1	30.3166	33.5723	27.8904	65.8009	77.8147	71.0156	ENSG00000103335.20	PIEZO1	chr16:88706462-88785211	MB231_CTRL	MB231_W2	OK	30.5931	71.5437	1.22562	3.22532	5e-05	0.000503098	yes
ENSG00000103342.12	GSPT1	71.6226	82.7679	86.7293	45.3151	54.264	45.2159	ENSG00000103342.12	GSPT1	chr16:11851648-11916082	MB231_CTRL	MB231_W2	OK	80.3733	48.265	-0.735739	-2.07613	0.0002	0.00172918	yes
ENSG00000103381.11	CPPED1	13.6107	17.8861	12.3771	9.29864	10.0153	9.59724	ENSG00000103381.11	CPPED1	chr16:12659798-12804017	MB231_CTRL	MB231_W2	OK	14.6246	9.63706	-0.601734	-1.5681	0.00955	0.042983	yes
ENSG00000103415.11	HMOX2	30.5945	31.0462	33.2767	17.8194	22.6672	16.2493	ENSG00000103415.11	HMOX2	chr16:4461679-4510347	MB231_CTRL	MB231_W2	OK	31.6392	18.912	-0.742411	-3.06287	5e-05	0.000503098	yes
ENSG00000103479.15	RBL2	4.71761	5.52566	5.85632	8.20356	8.70119	9.93236	ENSG00000103479.15	RBL2	chr16:53433976-53504411	MB231_CTRL	MB231_W2	OK	5.36653	8.94571	0.737206	1.79695	0.0011	0.00740172	yes
ENSG00000103490.13	PYCARD	16.0241	14.2777	12.1101	7.453	11.1012	9.53728	ENSG00000103490.13	PYCARD	chr16:31201484-31203452	MB231_CTRL	MB231_W2	OK	14.1373	9.36381	-0.594336	-1.78866	0.0018	0.0111376	yes
ENSG00000103494.12	RPGRIP1L	3.56187	4.72426	4.18397	7.21051	7.90732	9.95569	ENSG00000103494.12	RPGRIP1L	chr16:53597682-54158512	MB231_CTRL	MB231_W2	OK	4.1567	8.35784	1.00769	1.52743	0.00335	0.018518	yes
ENSG00000103496.14	STX4	16.8109	13.887	14.7468	22.1231	24.7593	22.0187	ENSG00000103496.14	STX4	chr16:31032888-31042975	MB231_CTRL	MB231_W2	OK	15.1482	22.967	0.600415	1.49555	0.00675	0.0325817	yes
ENSG00000103502.13	CDIPT	22.2075	23.9864	24.1863	18.507	16.0838	15.0265	ENSG00000103502.13	CDIPT	chr16:29858356-29868053	MB231_CTRL	MB231_W2	OK	23.4601	16.5391	-0.504324	-1.66303	0.0018	0.0111376	yes
ENSG00000103510.19	KAT8	7.17021	8.7195	10.2916	9.681	15.0215	12.0256	ENSG00000103510.19	KAT8	chr16:31115753-31131393	MB231_CTRL	MB231_W2	OK	8.72711	12.2427	0.488346	1.5511	0.0055	0.0277775	yes
ENSG00000103742.11	IGDCC4	1.26389	1.44271	2.0141	4.14618	2.36245	2.58569	ENSG00000103742.11	IGDCC4	chr15:65381463-65423072	MB231_CTRL	MB231_W2	OK	1.57357	3.03144	0.945965	1.05534	0.0073	0.034762	yes
ENSG00000103855.17	CD276	41.4665	45.1234	42.2069	23.9198	30.4932	25.0953	ENSG00000103855.17	CD276	chr15:73683965-73714518	MB231_CTRL	MB231_W2	OK	42.9322	26.5027	-0.695919	-2.49601	5e-05	0.000503098	yes
ENSG00000103888.15	CEMIP	14.8104	16.6616	15.9376	10.7238	9.14182	10.3632	ENSG00000103888.15	CEMIP	chr15:80779342-80989878	MB231_CTRL	MB231_W2	OK	15.8032	10.0763	-0.649253	-2.33805	0.00015	0.00134259	yes
ENSG00000103966.10	EHD4	16.8414	18.6252	19.8354	11.7559	16.2289	14.3042	ENSG00000103966.10	EHD4	chr15:41828084-41972578	MB231_CTRL	MB231_W2	OK	18.434	14.0963	-0.387051	-2.28866	0.0001	0.000939965	yes
ENSG00000103995.13	CEP152	6.86451	7.82231	7.88296	17.1997	19.9258	28.4599	ENSG00000103995.13	CEP152	chr15:48712927-48811909	MB231_CTRL	MB231_W2	OK	7.52326	21.8618	1.53898	2.55649	5e-05	0.000503098	yes
ENSG00000104047.14	DTWD1	6.07398	6.55714	7.1413	12.4201	14.9018	11.8347	ENSG00000104047.14	DTWD1	chr15:49620979-49656232	MB231_CTRL	MB231_W2	OK	6.5908	13.0522	0.985764	2.07845	5e-05	0.000503098	yes
ENSG00000104142.10	VPS18	6.39829	8.78325	7.43458	4.56006	5.19039	5.10571	ENSG00000104142.10	VPS18	chr15:40894429-40903975	MB231_CTRL	MB231_W2	OK	7.53871	4.95205	-0.60629	-2.36201	5e-05	0.000503098	yes
ENSG00000104177.17	MYEF2	15.8956	12.8636	12.265	26.9493	30.9545	30.2248	ENSG00000104177.17	MYEF2	chr15:48120971-48178517	MB231_CTRL	MB231_W2	OK	13.6747	29.3762	1.10314	3.35708	5e-05	0.000503098	yes
ENSG00000104218.14	CSPP1	2.2287	1.85598	2.58994	4.15673	9.66464	5.74728	ENSG00000104218.14	CSPP1	chr8:66964098-67343677	MB231_CTRL	MB231_W2	OK	2.22488	6.52288	1.55179	1.62832	0.00425	0.0225604	yes
ENSG00000104231.10	ZFAND1	26.4622	29.2443	30.5192	42.9004	59.2325	63.9785	ENSG00000104231.10	ZFAND1	chr8:81701333-81759515	MB231_CTRL	MB231_W2	OK	28.7419	55.3705	0.945962	3.66857	5e-05	0.000503098	yes
ENSG00000104331.8	IMPAD1	26.9947	27.9384	29.205	24.2763	21.9726	23.4139	ENSG00000104331.8	IMPAD1	chr8:56957932-56993844	MB231_CTRL	MB231_W2	OK	28.046	23.2209	-0.272371	-1.68676	0.00245	0.0143789	yes
ENSG00000104341.16	LAPTM4B	85.064	80.0108	74.8954	62.4266	58.1271	62.5069	ENSG00000104341.16	LAPTM4B	chr8:97775056-97853013	MB231_CTRL	MB231_W2	OK	79.9901	61.0202	-0.390534	-1.58826	0.00635	0.031079	yes
ENSG00000104365.13	IKBKB	12.4986	8.16149	11.7275	22.8936	13.1737	38.3076	ENSG00000104365.13	IKBKB	chr8:42271301-42332653	MB231_CTRL	MB231_W2	OK	10.7959	24.7916	1.19937	1.62678	0.0015	0.00960482	yes
ENSG00000104368.17	PLAT	171.582	188.389	173.691	92.2815	101.974	92.3452	ENSG00000104368.17	PLAT	chr8:42175232-42207724	MB231_CTRL	MB231_W2	OK	177.887	95.5336	-0.896885	-4.34553	5e-05	0.000503098	yes
ENSG00000104381.12	GDAP1	0.559084	0.436902	0.696926	1.70809	2.96766	2.32352	ENSG00000104381.12	GDAP1	chr8:74234699-74488872	MB231_CTRL	MB231_W2	OK	0.564304	2.33309	2.0477	0.685167	0.0012	0.00797254	yes
ENSG00000104408.9	EIF3E	277.786	275.328	270.604	332.147	369.634	355.701	ENSG00000104408.9	EIF3E	chr8:108201215-108435333	MB231_CTRL	MB231_W2	OK	274.573	352.494	0.36041	1.84185	0.0006	0.00442867	yes
ENSG00000104412.7	EMC2	15.2545	17.0556	20.7696	9.7522	12.1942	11.8113	ENSG00000104412.7	EMC2	chr8:108443600-108486918	MB231_CTRL	MB231_W2	OK	17.6932	11.2526	-0.652944	-2.61176	5e-05	0.000503098	yes
ENSG00000104419.14	NDRG1	138.355	159.12	125.903	82.5122	92.8067	76.0097	ENSG00000104419.14	NDRG1	chr8:133237170-133302022	MB231_CTRL	MB231_W2	OK	141.126	83.7762	-0.752372	-3.18897	5e-05	0.000503098	yes
ENSG00000104427.11	ZC2HC1A	1.89755	2.94379	2.63637	4.64287	4.61597	3.84708	ENSG00000104427.11	ZC2HC1A	chr8:78666046-78805523	MB231_CTRL	MB231_W2	OK	2.49257	4.36864	0.80955	1.46385	0.0043	0.0227428	yes
ENSG00000104522.15	TSTA3	35.2203	40.4913	33.3562	28.521	31.8701	25.3811	ENSG00000104522.15	TSTA3	chr8:143612617-143618048	MB231_CTRL	MB231_W2	OK	36.3559	28.5907	-0.346644	-1.40239	0.0102	0.0451989	yes
ENSG00000104549.11	SQLE	7.29195	8.55096	8.19732	4.56203	2.78772	2.78941	ENSG00000104549.11	SQLE	chr8:124998496-125022283	MB231_CTRL	MB231_W2	OK	8.01341	3.37972	-1.24551	-2.99999	5e-05	0.000503098	yes
ENSG00000104626.14	ERI1	20.2965	20.833	22.5423	14.0095	12.4324	14.623	ENSG00000104626.14	ERI1	chr8:9002146-9116746	MB231_CTRL	MB231_W2	OK	21.2239	13.6883	-0.632749	-1.7247	0.00135	0.00878859	yes
ENSG00000104635.13	SLC39A14	40.2683	47.6393	50.5659	21.6329	26.9871	33.7872	ENSG00000104635.13	SLC39A14	chr8:22367248-22434129	MB231_CTRL	MB231_W2	OK	46.1578	27.4691	-0.748767	-2.0191	0.00035	0.00280437	yes
ENSG00000104671.7	DCTN6	8.50482	10.8464	8.38324	13.487	15.2905	14.4349	ENSG00000104671.7	DCTN6	chr8:30095397-30183640	MB231_CTRL	MB231_W2	OK	9.24482	14.4042	0.639769	1.49936	0.00705	0.0337927	yes
ENSG00000104687.12	GSR	20.3757	22.4638	18.2916	11.7014	13.1139	12.0047	ENSG00000104687.12	GSR	chr8:30678060-30727926	MB231_CTRL	MB231_W2	OK	20.3771	12.2733	-0.731419	-3.1797	5e-05	0.000503098	yes
ENSG00000104689.9	TNFRSF10A	24.3151	25.911	25.5269	10.834	14.3007	13.4019	ENSG00000104689.9	TNFRSF10A	chr8:23189278-23230926	MB231_CTRL	MB231_W2	OK	25.251	12.8455	-0.975076	-3.26609	5e-05	0.000503098	yes
ENSG00000104714.13	ERICH1	4.56132	5.07547	5.94285	6.44278	8.1005	8.66825	ENSG00000104714.13	ERICH1	chr8:614745-1708474	MB231_CTRL	MB231_W2	OK	5.19322	7.73718	0.575179	1.13057	0.0103	0.0455513	yes
ENSG00000104731.13	KLHDC4	6.9549	10.7236	9.97652	11.385	20.1716	22.3595	ENSG00000104731.13	KLHDC4	chr16:87600525-87765992	MB231_CTRL	MB231_W2	OK	9.21835	17.9721	0.963174	2.01087	5e-05	0.000503098	yes
ENSG00000104859.14	CLASRP	5.18225	5.68142	4.79523	23.9474	25.4949	16.0371	ENSG00000104859.14	CLASRP	chr19:45039039-45070956	MB231_CTRL	MB231_W2	OK	5.21963	21.8265	2.06406	3.29429	5e-05	0.000503098	yes
ENSG00000104880.17	ARHGEF18	22.0024	23.5031	24.7649	15.3098	15.2367	17.3206	ENSG00000104880.17	ARHGEF18	chr19:7348942-7472477	MB231_CTRL	MB231_W2	OK	23.4235	15.9557	-0.553883	-1.59096	0.00835	0.0386389	yes
ENSG00000104885.17	DOT1L	11.6117	12.1338	11.4929	18.3147	24.0931	23.0235	ENSG00000104885.17	DOT1L	chr19:2100987-2248679	MB231_CTRL	MB231_W2	OK	11.7461	21.8104	0.892831	1.46843	0.0049	0.0253321	yes
ENSG00000104899.6	AMH	2.31393	2.58431	3.23469	18.1753	29.9944	35.2396	ENSG00000104899.6	AMH	chr19:2249308-2252073	MB231_CTRL	MB231_W2	OK	2.71098	27.8031	3.35836	2.49891	5e-05	0.000503098	yes
ENSG00000104936.17	DMPK	6.70347	6.2439	6.58398	16.6783	17.4234	21.4263	ENSG00000104936.17	DMPK	chr19:45764784-45792802	MB231_CTRL	MB231_W2	OK	6.51045	18.5093	1.50742	2.69799	5e-05	0.000503098	yes
ENSG00000104957.13	CCDC130	3.438	4.36809	4.33457	8.34158	11.3852	10.7184	ENSG00000104957.13	CCDC130	chr19:13731759-13763296	MB231_CTRL	MB231_W2	OK	4.04689	10.1484	1.32636	3.29444	5e-05	0.000503098	yes
ENSG00000104983.8	CCDC61	2.46078	2.14203	2.39283	3.15799	7.32019	6.36387	ENSG00000104983.8	CCDC61	chr19:45995460-46023065	MB231_CTRL	MB231_W2	OK	2.33188	5.61402	1.26754	1.25674	0.0011	0.00740172	yes
ENSG00000104998.3	IL27RA	3.54879	3.54763	2.90785	1.57925	1.92627	2.06656	ENSG00000104998.3	IL27RA	chr19:14031747-14053216	MB231_CTRL	MB231_W2	OK	3.33476	1.85736	-0.844327	-2.35088	0.00015	0.00134259	yes
ENSG00000105011.8	ASF1B	32.0913	38.3032	36.1954	38.6898	53.7735	48.1507	ENSG00000105011.8	ASF1B	chr19:14119105-14136956	MB231_CTRL	MB231_W2	OK	35.53	46.8713	0.399669	1.88591	0.00075	0.00534003	yes
ENSG00000105048.16	TNNT1	16.9855	21.1914	19.8249	15.1946	13.524	16.9568	ENSG00000105048.16	TNNT1	chr19:55132793-55149354	MB231_CTRL	MB231_W2	OK	19.334	15.2251	-0.344681	-1.38603	0.0102	0.0451989	yes
ENSG00000105058.11	FAM32A	47.2974	46.7634	45.2911	33.0678	39.5201	42.3737	ENSG00000105058.11	FAM32A	chr19:16185379-16192046	MB231_CTRL	MB231_W2	OK	46.4506	38.3205	-0.277581	-1.72893	0.00295	0.0166971	yes
ENSG00000105136.19	ZNF419	2.58712	2.57329	2.57424	5.91439	2.37152	6.83041	ENSG00000105136.19	ZNF419	chr19:57487710-57518404	MB231_CTRL	MB231_W2	OK	2.57822	5.03877	0.966699	0.959187	0.00535	0.0271868	yes
ENSG00000105185.11	PDCD5	58.172	61.4197	67.7873	40.0947	47.1294	41.1005	ENSG00000105185.11	PDCD5	chr19:32581067-32587452	MB231_CTRL	MB231_W2	OK	62.4597	42.7749	-0.546162	-2.85171	5e-05	0.000503098	yes
ENSG00000105193.8	RPS16	530.585	539.969	508.288	612.164	753.747	698.153	ENSG00000105193.8	RPS16	chr19:39433206-39435948	MB231_CTRL	MB231_W2	OK	526.281	688.021	0.38662	2.33129	5e-05	0.000503098	yes
ENSG00000105202.7	FBL	140.433	144.527	153.255	87.1292	73.978	85.5457	ENSG00000105202.7	FBL	chr19:39834457-39846414	MB231_CTRL	MB231_W2	OK	146.072	82.2177	-0.829157	-2.70417	5e-05	0.000503098	yes
ENSG00000105220.14	GPI	166.218	178.039	170.568	106.712	118.923	90.9333	ENSG00000105220.14	GPI	chr19:34359479-34428273	MB231_CTRL	MB231_W2	OK	171.608	105.523	-0.701567	-2.7094	5e-05	0.000503098	yes
ENSG00000105229.6	PIAS4	12.8375	14.9125	15.6921	8.98449	8.64205	10.7227	ENSG00000105229.6	PIAS4	chr19:4007645-4039386	MB231_CTRL	MB231_W2	OK	14.4807	9.44973	-0.615787	-1.32172	0.0109	0.0476425	yes
ENSG00000105254.11	TBCB	39.6543	41.4675	39.7173	19.2701	32.9736	26.3316	ENSG00000105254.11	TBCB	chr19:36111150-36125947	MB231_CTRL	MB231_W2	OK	40.2797	26.1918	-0.62094	-1.73695	0.0022	0.0131607	yes
ENSG00000105281.12	SLC1A5	93.3501	104.647	103.433	57.0729	75.7705	68.9996	ENSG00000105281.12	SLC1A5	chr19:46719506-46789043	MB231_CTRL	MB231_W2	OK	100.477	67.281	-0.578588	-2.32747	0.00025	0.00209262	yes
ENSG00000105339.10	DENND3	5.43331	4.53184	5.36343	9.65675	11.5202	17.993	ENSG00000105339.10	DENND3	chr8:141117277-141195808	MB231_CTRL	MB231_W2	OK	5.10952	13.0566	1.35352	2.54912	5e-05	0.000503098	yes
ENSG00000105355.8	PLIN3	92.2793	106.224	96.4361	55.6032	77.1166	68.0103	ENSG00000105355.8	PLIN3	chr19:4838331-4867768	MB231_CTRL	MB231_W2	OK	98.3132	66.91	-0.555162	-2.12481	0.0005	0.00379645	yes
ENSG00000105376.4	ICAM5	2.01825	0.31229	1.58404	3.64456	4.14048	4.87208	ENSG00000105376.4	ICAM5	chr19:10289980-10296778	MB231_CTRL	MB231_W2	OK	1.30486	4.21904	1.69302	1.3394	0.0109	0.0476425	yes
ENSG00000105397.13	TYK2	14.1394	16.9224	15.9853	48.8013	51.8685	48.7371	ENSG00000105397.13	TYK2	chr19:10350528-10380676	MB231_CTRL	MB231_W2	OK	15.6824	49.8023	1.66707	4.81534	5e-05	0.000503098	yes
ENSG00000105438.8	KDELR1	193.58	195.669	183.375	112.174	139.341	136.831	ENSG00000105438.8	KDELR1	chr19:48382569-48391553	MB231_CTRL	MB231_W2	OK	190.875	129.449	-0.560244	-3.285	5e-05	0.000503098	yes
ENSG00000105443.13	CYTH2	15.3927	13.7707	17.6752	30.1824	44.0675	42.26	ENSG00000105443.13	CYTH2	chr19:48445772-48482314	MB231_CTRL	MB231_W2	OK	15.6129	38.8366	1.31468	2.76575	5e-05	0.000503098	yes
ENSG00000105483.16	CARD8	8.32552	10.5286	11	13.5074	16.434	18.5362	ENSG00000105483.16	CARD8	chr19:48170691-48287608	MB231_CTRL	MB231_W2	OK	9.95138	16.1592	0.699385	1.42338	0.00735	0.0349386	yes
ENSG00000105486.13	LIG1	13.8038	14.0601	14.6861	20.2747	26.9737	21.2617	ENSG00000105486.13	LIG1	chr19:48115444-48170603	MB231_CTRL	MB231_W2	OK	14.1833	22.8367	0.687158	2.12137	0.0002	0.00172918	yes
ENSG00000105559.11	PLEKHA4	2.20385	3.88645	3.43179	6.52034	9.17627	4.60084	ENSG00000105559.11	PLEKHA4	chr19:48837096-48868632	MB231_CTRL	MB231_W2	OK	3.17403	6.76582	1.09195	1.20099	0.0043	0.0227428	yes
ENSG00000105568.17	PPP2R1A	67.5672	77.0254	67.6588	34.9167	53.6963	49.8841	ENSG00000105568.17	PPP2R1A	chr19:52190038-52231294	MB231_CTRL	MB231_W2	OK	70.7505	46.1657	-0.615918	-2.02363	0.00155	0.00984337	yes
ENSG00000105576.15	TNPO2	33.5961	37.741	44.2205	66.0139	58.0663	67.0477	ENSG00000105576.15	TNPO2	chr19:12699193-12724011	MB231_CTRL	MB231_W2	OK	38.5192	63.7093	0.725926	1.80182	0.0014	0.00906419	yes
ENSG00000105612.8	DNASE2	11.0252	13.1789	12.3997	7.40864	8.42057	9.62593	ENSG00000105612.8	DNASE2	chr19:12875210-12884088	MB231_CTRL	MB231_W2	OK	12.2013	8.48505	-0.524037	-1.85023	0.00085	0.00593698	yes
ENSG00000105640.12	RPL18A	171.075	207.901	193.084	231.214	218.117	255.959	ENSG00000105640.12	RPL18A	chr19:17859875-17864153	MB231_CTRL	MB231_W2	OK	190.687	235.097	0.302052	1.78257	0.00155	0.00984337	yes
ENSG00000105643.9	ARRDC2	4.99913	4.09229	4.41317	6.23064	10.3222	9.82846	ENSG00000105643.9	ARRDC2	chr19:18001131-18014102	MB231_CTRL	MB231_W2	OK	4.50153	8.79377	0.966067	1.84249	5e-05	0.000503098	yes
ENSG00000105647.15	PIK3R2	16.0903	14.3221	15.09	19.1308	21.2383	25.6666	ENSG00000105647.15	PIK3R2	chr19:18153117-18178117	MB231_CTRL	MB231_W2	OK	15.1675	22.0119	0.537303	1.53387	0.00415	0.0221008	yes
ENSG00000105699.16	LSR	17.7708	17.5192	15.0111	12.7024	10.8523	13.6293	ENSG00000105699.16	LSR	chr19:35248329-35267964	MB231_CTRL	MB231_W2	OK	16.7671	12.3947	-0.43591	-1.28871	0.00715	0.0341897	yes
ENSG00000105700.10	KXD1	30.5654	29.9787	26.0313	32.4474	40.1769	33.3976	ENSG00000105700.10	KXD1	chr19:18557761-18569387	MB231_CTRL	MB231_W2	OK	28.8585	35.3406	0.292333	1.39977	0.0101	0.0448503	yes
ENSG00000105701.15	FKBP8	81.0705	92.2342	90.2883	53.9125	67.4245	67.5852	ENSG00000105701.15	FKBP8	chr19:18531612-18544077	MB231_CTRL	MB231_W2	OK	87.8643	62.9741	-0.480519	-2.71693	5e-05	0.000503098	yes
ENSG00000105705.15	SUGP1	8.41452	13.7377	8.24581	14.1484	13.314	22.9806	ENSG00000105705.15	SUGP1	chr19:19276017-19358755	MB231_CTRL	MB231_W2	OK	10.1327	16.8143	0.730676	1.35387	0.0099	0.0441799	yes
ENSG00000105717.13	PBX4	2.3192	2.36934	2.74319	8.49271	6.85968	9.06645	ENSG00000105717.13	PBX4	chr19:19561706-19618916	MB231_CTRL	MB231_W2	OK	2.47724	8.13961	1.71623	3.24939	5e-05	0.000503098	yes
ENSG00000105723.11	GSK3A	38.0025	42.6682	35.2357	25.0389	30.6255	24.7614	ENSG00000105723.11	GSK3A	chr19:42230185-42255157	MB231_CTRL	MB231_W2	OK	38.6355	26.8086	-0.52723	-1.83671	0.00155	0.00984337	yes
ENSG00000105726.16	ATP13A1	29.8878	30.6809	29.5073	36.699	42.7443	43.2759	ENSG00000105726.16	ATP13A1	chr19:19645197-19663693	MB231_CTRL	MB231_W2	OK	30.0253	40.9064	0.446148	1.48133	0.00755	0.0357277	yes
ENSG00000105750.14	ZNF85	6.58915	9.56533	7.47181	17.9534	12.3947	20.3251	ENSG00000105750.14	ZNF85	chr19:20923221-20950697	MB231_CTRL	MB231_W2	OK	7.87543	16.8911	1.10083	2.49483	5e-05	0.000503098	yes
ENSG00000105821.14	DNAJC2	10.5322	9.42482	12.7088	21.7134	22.4186	19.4417	ENSG00000105821.14	DNAJC2	chr7:103297421-103989516	MB231_CTRL	MB231_W2	OK	10.8886	21.1912	0.96065	1.45063	0.0011	0.00740172	yes
ENSG00000105825.11	TFPI2	50.6429	54.7545	53.8596	36.6683	35.8737	45.7398	ENSG00000105825.11	TFPI2	chr7:93591572-93911265	MB231_CTRL	MB231_W2	OK	53.0857	39.4273	-0.429128	-1.80947	0.0035	0.0192041	yes
ENSG00000105829.11	BET1	17.4779	26.3684	21.2873	37.9204	35.7803	37.32	ENSG00000105829.11	BET1	chr7:93962761-94011113	MB231_CTRL	MB231_W2	OK	21.7112	37.0069	0.769355	2.95354	5e-05	0.000503098	yes
ENSG00000105854.12	PON2	8.52355	6.98453	9.80175	19.654	28.5189	18.0972	ENSG00000105854.12	PON2	chr7:95404862-95435329	MB231_CTRL	MB231_W2	OK	8.43661	22.0901	1.38866	2.97459	5e-05	0.000503098	yes
ENSG00000105887.10	MTPN	108.195	120.348	120.79	97.5927	93.1777	87.1971	ENSG00000105887.10	MTPN	chr7:135926454-135977353	MB231_CTRL	MB231_W2	OK	116.444	92.6558	-0.329684	-1.85409	0.00085	0.00593698	yes
ENSG00000105894.11	PTN	0.6644	1.64642	0.855159	1.90058	2.55383	1.68426	ENSG00000105894.11	PTN	chr7:137227340-137343865	MB231_CTRL	MB231_W2	OK	1.05533	2.04622	0.955274	2.19248	0.0007	0.00502945	yes
ENSG00000105939.12	ZC3HAV1	48.5918	48.896	56.2617	33.6161	26.9386	33.651	ENSG00000105939.12	ZC3HAV1	chr7:139043519-139109719	MB231_CTRL	MB231_W2	OK	51.2499	31.4019	-0.706697	-3.40506	5e-05	0.000503098	yes
ENSG00000105948.13	TTC26	5.48332	5.68906	6.76171	4.23034	4.32234	4.03044	ENSG00000105948.13	TTC26	chr7:139133743-139191986	MB231_CTRL	MB231_W2	OK	5.97803	4.19438	-0.511214	-1.38982	0.00665	0.0322099	yes
ENSG00000105953.14	OGDH	41.6592	45.2752	42.5818	24.0861	23.7311	28.4874	ENSG00000105953.14	OGDH	chr7:44606571-44709066	MB231_CTRL	MB231_W2	OK	43.1721	25.4349	-0.763291	-2.9184	5e-05	0.000503098	yes
ENSG00000105971.14	CAV2	143.893	136.382	145.314	164.188	219.989	201.914	ENSG00000105971.14	CAV2	chr7:116209233-116508541	MB231_CTRL	MB231_W2	OK	141.863	195.364	0.461663	1.68514	0.0024	0.0141469	yes
ENSG00000105976.14	MET	74.6963	82.5978	80.2834	51.3033	48.8008	46.4939	ENSG00000105976.14	MET	chr7:116672389-116798386	MB231_CTRL	MB231_W2	OK	79.1925	48.866	-0.696533	-3.1333	5e-05	0.000503098	yes
ENSG00000106003.12	LFNG	9.86423	10.5441	9.03207	12.9107	15.0008	17.1783	ENSG00000106003.12	LFNG	chr7:2512528-2529177	MB231_CTRL	MB231_W2	OK	9.81348	15.0299	0.615	2.11522	0.0001	0.000939965	yes
ENSG00000106049.8	HIBADH	33.1686	34.6178	37.8836	22.8398	26.3881	30.5042	ENSG00000106049.8	HIBADH	chr7:27525441-27662995	MB231_CTRL	MB231_W2	OK	35.2233	26.5774	-0.406333	-2.10237	0.0001	0.000939965	yes
ENSG00000106052.13	TAX1BP1	34.8631	39.4076	39.0494	24.3995	27.9189	23.9837	ENSG00000106052.13	TAX1BP1	chr7:27733063-28243917	MB231_CTRL	MB231_W2	OK	37.7734	25.434	-0.570608	-2.75188	5e-05	0.000503098	yes
ENSG00000106069.20	CHN2	1.85937	0.481413	2.65367	3.77334	4.14344	9.05736	ENSG00000106069.20	CHN2	chr7:28979966-29563670	MB231_CTRL	MB231_W2	OK	1.66482	5.65805	1.76494	0.9752	5e-05	0.000503098	yes
ENSG00000106089.11	STX1A	18.7094	19.9236	21.8206	38.7807	51.1329	54.4418	ENSG00000106089.11	STX1A	chr7:73680968-73719672	MB231_CTRL	MB231_W2	OK	20.1512	48.1185	1.25573	4.37205	5e-05	0.000503098	yes
ENSG00000106125.14	FAM188B	1.33531	1.46512	1.82266	1.85165	2.53455	3.03709	ENSG00000106125.14	FAM188B	chr7:30651942-30925516	MB231_CTRL	MB231_W2	OK	1.54103	2.47443	0.683204	1.69463	0.005	0.025747	yes
ENSG00000106133.17	NSUN5P2	0.933653	1.02606	2.07355	5.82089	6.26646	7.41788	ENSG00000106133.17	NSUN5P2	chr7:72879364-72954790	MB231_CTRL	MB231_W2	OK	1.34442	6.50174	2.27384	2.16481	0.00125	0.00825545	yes
ENSG00000106144.19	CASP2	18.0483	19.1558	16.3661	12.0124	15.198	13.6352	ENSG00000106144.19	CASP2	chr7:143288214-143307696	MB231_CTRL	MB231_W2	OK	17.8567	13.6152	-0.391248	-1.72386	0.00315	0.0175845	yes
ENSG00000106153.12	CHCHD2	167.165	177.044	152.733	176.745	229.726	231.82	ENSG00000106153.12	CHCHD2	chr7:56101568-56106576	MB231_CTRL	MB231_W2	OK	165.648	212.764	0.361135	2.25701	5e-05	0.000503098	yes
ENSG00000106211.8	HSPB1	261.686	269.159	231.79	75.0686	110.441	93.139	ENSG00000106211.8	HSPB1	chr7:76302543-76304295	MB231_CTRL	MB231_W2	OK	254.212	92.8829	-1.45255	-8.43522	5e-05	0.000503098	yes
ENSG00000106244.12	PDAP1	79.5457	92.8446	102.883	51.6345	53.6254	62.4314	ENSG00000106244.12	PDAP1	chr7:99325897-99466331	MB231_CTRL	MB231_W2	OK	91.7576	55.8971	-0.715054	-1.59631	0.00145	0.00933362	yes
ENSG00000106263.17	EIF3B	141.082	149.481	154.134	103.577	125.299	113.68	ENSG00000106263.17	EIF3B	chr7:2251769-2380745	MB231_CTRL	MB231_W2	OK	148.232	114.185	-0.376484	-1.51385	0.0109	0.0476425	yes
ENSG00000106299.7	WASL	19.327	22.1688	22.1726	14.163	16.3851	15.4453	ENSG00000106299.7	WASL	chr7:123681934-123749067	MB231_CTRL	MB231_W2	OK	21.2228	15.3312	-0.469151	-2.85164	5e-05	0.000503098	yes
ENSG00000106348.16	IMPDH1	33.6394	38.0974	30.3901	21.7816	23.05	24.7011	ENSG00000106348.16	IMPDH1	chr7:128392276-128410252	MB231_CTRL	MB231_W2	OK	34.0423	23.1776	-0.554599	-2.34977	5e-05	0.000503098	yes
ENSG00000106351.12	AGFG2	12.883	13.19	11.7187	7.0836	5.58492	7.99765	ENSG00000106351.12	AGFG2	chr7:100539210-100568219	MB231_CTRL	MB231_W2	OK	12.5972	6.88872	-0.870796	-1.96269	0.00065	0.00473038	yes
ENSG00000106355.9	LSM5	44.3675	44.9433	47.0505	72.4942	71.5464	73.8234	ENSG00000106355.9	LSM5	chr7:32485331-32495283	MB231_CTRL	MB231_W2	OK	45.4538	72.6213	0.675994	3.89125	5e-05	0.000503098	yes
ENSG00000106366.8	SERPINE1	106.417	126.85	118.437	68.0279	79.0483	75.3228	ENSG00000106366.8	SERPINE1	chr7:101127088-101139266	MB231_CTRL	MB231_W2	OK	117.235	74.133	-0.661212	-4.10132	5e-05	0.000503098	yes
ENSG00000106367.13	AP1S1	26.1878	33.22	32.0631	19.5346	22.0632	25.2644	ENSG00000106367.13	AP1S1	chr7:101154396-101161596	MB231_CTRL	MB231_W2	OK	30.4903	22.2874	-0.452124	-1.90302	0.00175	0.0108959	yes
ENSG00000106399.11	RPA3	31.5586	25.3337	25.4791	47.8002	55.8854	60.0771	ENSG00000106399.11	RPA3	chr7:7636517-8094272	MB231_CTRL	MB231_W2	OK	27.4571	54.5875	0.99139	3.19768	5e-05	0.000503098	yes
ENSG00000106404.13	CLDN15	2.37213	2.48234	3.39326	5.1041	7.2495	5.37007	ENSG00000106404.13	CLDN15	chr7:101232091-101238820	MB231_CTRL	MB231_W2	OK	2.74924	5.90789	1.10361	1.34	0.0043	0.0227428	yes
ENSG00000106459.14	NRF1	7.95527	6.02617	8.15949	4.3807	4.74659	4.81079	ENSG00000106459.14	NRF1	chr7:129611713-129757082	MB231_CTRL	MB231_W2	OK	7.38031	4.64602	-0.667685	-1.63074	0.00255	0.014853	yes
ENSG00000106460.18	TMEM106B	13.719	19.1749	18.2896	26.378	32.0244	27.6366	ENSG00000106460.18	TMEM106B	chr7:12211240-12243367	MB231_CTRL	MB231_W2	OK	17.0612	28.6797	0.749311	2.80688	5e-05	0.000503098	yes
ENSG00000106462.10	EZH2	24.6718	26.1588	26.7514	34.8994	35.9122	38.2651	ENSG00000106462.10	EZH2	chr7:148807382-148884321	MB231_CTRL	MB231_W2	OK	25.8607	36.3589	0.491545	2.40125	0.0002	0.00172918	yes
ENSG00000106537.7	TSPAN13	0.826916	0.405061	0.779057	4.33532	1.08313	1.25928	ENSG00000106537.7	TSPAN13	chr7:16753534-16784536	MB231_CTRL	MB231_W2	OK	0.670345	2.22591	1.73142	1.47104	0.007	0.0336211	yes
ENSG00000106546.12	AHR	46.2206	57.4883	55.3948	29.0598	29.3325	34.0337	ENSG00000106546.12	AHR	chr7:17279833-17558909	MB231_CTRL	MB231_W2	OK	53.0346	30.8087	-0.783598	-3.49739	5e-05	0.000503098	yes
ENSG00000106554.11	CHCHD3	66.1224	71.5267	74.3159	37.5495	42.9333	47.0487	ENSG00000106554.11	CHCHD3	chr7:132784867-133082088	MB231_CTRL	MB231_W2	OK	70.655	42.5105	-0.732972	-3.69671	5e-05	0.000503098	yes
ENSG00000106603.17	COA1	31.3955	32.0159	32.7322	54.1222	69.3347	45.692	ENSG00000106603.17	COA1	chr7:43582757-43729717	MB231_CTRL	MB231_W2	OK	32.0479	56.383	0.815031	2.12908	0.0002	0.00172918	yes
ENSG00000106605.10	BLVRA	35.6285	38.5133	53.3754	16.3417	12.9384	18.1352	ENSG00000106605.10	BLVRA	chr7:43758679-43807342	MB231_CTRL	MB231_W2	OK	42.5057	15.8051	-1.42727	-3.10808	5e-05	0.000503098	yes
ENSG00000106608.16	URGCP	13.8238	15.6684	15.6836	10.9534	9.48307	9.51282	ENSG00000106608.16	URGCP	chr7:43866557-43926411	MB231_CTRL	MB231_W2	OK	15.0586	9.9831	-0.593029	-1.3025	0.0112	0.0486671	yes
ENSG00000106610.14	STAG3L4	6.00632	7.87918	6.35638	18.2268	10.9768	14.5875	ENSG00000106610.14	STAG3L4	chr7:67295607-67321526	MB231_CTRL	MB231_W2	OK	6.74729	14.597	1.1133	3.25644	5e-05	0.000503098	yes
ENSG00000106615.9	RHEB	109.999	115.187	114.97	146.784	161.131	144.159	ENSG00000106615.9	RHEB	chr7:151466011-151520120	MB231_CTRL	MB231_W2	OK	113.385	150.691	0.410366	1.87427	0.00155	0.00984337	yes
ENSG00000106682.14	EIF4H	121.808	111.758	107.515	72.4546	67.7876	71.0651	ENSG00000106682.14	EIF4H	chr7:74174244-74197101	MB231_CTRL	MB231_W2	OK	113.693	70.4358	-0.690767	-2.70663	5e-05	0.000503098	yes
ENSG00000106701.11	FSD1L	1.64908	1.24386	2.6297	4.39112	5.00842	7.57704	ENSG00000106701.11	FSD1L	chr9:105447795-105552433	MB231_CTRL	MB231_W2	OK	1.84088	5.65886	1.62012	2.77404	5e-05	0.000503098	yes
ENSG00000106714.17	CNTNAP3	0.476693	0.508474	0.71788	1.68746	2.52743	1.78503	ENSG00000106714.17	CNTNAP3	chr9:39072766-39288315	MB231_CTRL	MB231_W2	OK	0.567682	1.99997	1.81682	0.654246	0.0038	0.0205228	yes
ENSG00000106780.8	MEGF9	15.3934	15.126	16.9072	8.25194	7.09818	7.41665	ENSG00000106780.8	MEGF9	chr9:120600812-120714470	MB231_CTRL	MB231_W2	OK	15.8089	7.58893	-1.05877	-5.91614	5e-05	0.000503098	yes
ENSG00000106789.12	CORO2A	5.1545	5.75825	5.81109	3.00109	3.72562	4.04858	ENSG00000106789.12	CORO2A	chr9:98120974-98192640	MB231_CTRL	MB231_W2	OK	5.57462	3.59176	-0.63418	-3.09175	5e-05	0.000503098	yes
ENSG00000106799.12	TGFBR1	36.5686	39.8601	40.7068	26.6063	25.9103	26.7953	ENSG00000106799.12	TGFBR1	chr9:99104037-99154192	MB231_CTRL	MB231_W2	OK	39.0452	26.4373	-0.562571	-2.76914	5e-05	0.000503098	yes
ENSG00000106803.9	SEC61B	73.819	64.8027	67.3378	72.4076	109.339	81.009	ENSG00000106803.9	SEC61B	chr9:99222063-99230615	MB231_CTRL	MB231_W2	OK	68.6531	87.5851	0.35136	1.59965	0.00605	0.0299125	yes
ENSG00000106853.17	PTGR1	48.2642	49.0955	52.071	29.8884	35.9129	26.5707	ENSG00000106853.17	PTGR1	chr9:111525158-111599855	MB231_CTRL	MB231_W2	OK	49.8103	30.7906	-0.693951	-2.90089	5e-05	0.000503098	yes
ENSG00000106868.16	SUSD1	15.0343	14.6706	16.4564	11.6912	9.44481	9.50194	ENSG00000106868.16	SUSD1	chr9:112040784-112175408	MB231_CTRL	MB231_W2	OK	15.3871	10.2126	-0.591365	-1.48597	0.0092	0.0416604	yes
ENSG00000106948.16	AKNA	4.48428	3.82947	3.63451	5.53276	6.7252	8.76503	ENSG00000106948.16	AKNA	chr9:114334155-114394405	MB231_CTRL	MB231_W2	OK	3.98275	7.00766	0.815168	1.44056	0.00395	0.0212179	yes
ENSG00000106992.17	AK1	37.0848	41.8186	51.2957	19.9616	19.9911	16.1884	ENSG00000106992.17	AK1	chr9:127866479-127905408	MB231_CTRL	MB231_W2	OK	43.3997	18.7137	-1.21359	-3.06549	5e-05	0.000503098	yes
ENSG00000107020.9	PLGRKT	6.51693	9.21408	7.76459	16.4778	16.2474	9.79286	ENSG00000107020.9	PLGRKT	chr9:5357972-5437878	MB231_CTRL	MB231_W2	OK	7.83187	14.1727	0.855683	2.45639	5e-05	0.000503098	yes
ENSG00000107021.15	TBC1D13	10.6385	11.8036	11.7349	7.57855	7.81347	7.74554	ENSG00000107021.15	TBC1D13	chr9:128787203-128810432	MB231_CTRL	MB231_W2	OK	11.3923	7.71252	-0.562787	-2.09783	0.00025	0.00209262	yes
ENSG00000107130.9	NCS1	16.2712	18.0237	18.6002	11.1343	11.2815	10.4331	ENSG00000107130.9	NCS1	chr9:130172577-130237304	MB231_CTRL	MB231_W2	OK	17.6317	10.9497	-0.687289	-2.75673	5e-05	0.000503098	yes
ENSG00000107201.9	DDX58	19.3602	22.0307	21.5881	9.38564	9.09894	9.6765	ENSG00000107201.9	DDX58	chr9:32455704-32526324	MB231_CTRL	MB231_W2	OK	20.993	9.38703	-1.16117	-6.90424	5e-05	0.000503098	yes
ENSG00000107223.12	EDF1	143	136.168	141.009	80.0036	96.8943	89.0916	ENSG00000107223.12	EDF1	chr9:136862118-136866286	MB231_CTRL	MB231_W2	OK	140.059	88.6632	-0.659627	-4.23711	5e-05	0.000503098	yes
ENSG00000107263.18	RAPGEF1	39.4111	43.3077	45.7642	21.4118	24.8824	27.3946	ENSG00000107263.18	RAPGEF1	chr9:131576769-131740074	MB231_CTRL	MB231_W2	OK	42.8277	24.5629	-0.80206	-2.93008	5e-05	0.000503098	yes
ENSG00000107331.16	ABCA2	8.96832	11.2858	9.24068	20.5315	21.8122	22.1073	ENSG00000107331.16	ABCA2	chr9:137007226-137046203	MB231_CTRL	MB231_W2	OK	9.83161	21.4836	1.12774	2.21534	5e-05	0.000503098	yes
ENSG00000107341.4	UBE2R2	24.3218	26.1707	26.5671	16.4676	17.3285	17.0857	ENSG00000107341.4	UBE2R2	chr9:33750465-33920404	MB231_CTRL	MB231_W2	OK	25.6866	16.9606	-0.598825	-3.48794	5e-05	0.000503098	yes
ENSG00000107372.12	ZFAND5	58.8223	67.3685	70.95	80.3984	84.8907	84.0185	ENSG00000107372.12	ZFAND5	chr9:72351424-72365235	MB231_CTRL	MB231_W2	OK	65.7136	83.1025	0.3387	1.58938	0.0065	0.0316088	yes
ENSG00000107438.8	PDLIM1	41.363	48.6263	42.1002	31.5384	26.1242	36.4253	ENSG00000107438.8	PDLIM1	chr10:95237571-95291024	MB231_CTRL	MB231_W2	OK	44.0298	31.3626	-0.489435	-2.31849	5e-05	0.000503098	yes
ENSG00000107566.13	ERLIN1	43.7369	44.9106	48.3239	30.1556	31.9026	33.4665	ENSG00000107566.13	ERLIN1	chr10:100150093-100229619	MB231_CTRL	MB231_W2	OK	45.6571	31.8416	-0.519929	-2.07162	0.00055	0.0041207	yes
ENSG00000107581.12	EIF3A	106.318	117.776	140.05	69.661	67.0879	69.2222	ENSG00000107581.12	EIF3A	chr10:119029715-119080823	MB231_CTRL	MB231_W2	OK	121.382	68.657	-0.82207	-3.46038	5e-05	0.000503098	yes
ENSG00000107643.15	MAPK8	21.5594	19.1993	22.74	31.0531	27.5987	30.309	ENSG00000107643.15	MAPK8	chr10:48306638-48439360	MB231_CTRL	MB231_W2	OK	21.1663	29.6536	0.486441	1.49581	0.00605	0.0299125	yes
ENSG00000107672.14	NSMCE4A	27.2964	26.1771	28.2558	57.3281	60.1753	62.143	ENSG00000107672.14	NSMCE4A	chr10:121956781-121975217	MB231_CTRL	MB231_W2	OK	27.2431	59.8821	1.13623	3.84991	5e-05	0.000503098	yes
ENSG00000107779.12	BMPR1A	17.2605	18.0857	16.8966	11.4021	10.1762	13.8643	ENSG00000107779.12	BMPR1A	chr10:86756649-86932838	MB231_CTRL	MB231_W2	OK	17.4143	11.8142	-0.559749	-1.51251	0.00765	0.0361061	yes
ENSG00000107789.15	MINPP1	23.8571	26.6119	25.7832	16.166	19.9996	20.9897	ENSG00000107789.15	MINPP1	chr10:87504874-87553460	MB231_CTRL	MB231_W2	OK	25.4174	19.0517	-0.415894	-2.04081	0.00035	0.00280437	yes
ENSG00000107819.13	SFXN3	21.3113	21.9789	23.0652	25.3199	30.4756	34.8973	ENSG00000107819.13	SFXN3	chr10:101031233-101041244	MB231_CTRL	MB231_W2	OK	22.1185	30.2309	0.450773	2.17708	0.00025	0.00209262	yes
ENSG00000107854.5	TNKS2	11.9416	12.6015	13.4173	9.83076	10.2902	10.5858	ENSG00000107854.5	TNKS2	chr10:91798311-91865276	MB231_CTRL	MB231_W2	OK	12.6535	10.2356	-0.30594	-1.78625	0.0015	0.00960482	yes
ENSG00000107862.4	GBF1	13.51	14.7036	14.1018	10.4528	9.74965	10.674	ENSG00000107862.4	GBF1	chr10:102245531-102382899	MB231_CTRL	MB231_W2	OK	14.1052	10.2921	-0.45468	-2.33441	5e-05	0.000503098	yes
ENSG00000107872.12	FBXL15	4.46897	8.91915	6.16949	1.38102	4.92105	3.81757	ENSG00000107872.12	FBXL15	chr10:102402616-102423136	MB231_CTRL	MB231_W2	OK	6.51921	3.37321	-0.950572	-1.30886	0.0101	0.0448503	yes
ENSG00000107874.10	CUEDC2	23.6311	27.8243	24.0831	12.908	19.0477	23.6118	ENSG00000107874.10	CUEDC2	chr10:102423244-102432661	MB231_CTRL	MB231_W2	OK	25.1795	18.5225	-0.442973	-1.57097	0.01045	0.0460694	yes
ENSG00000107897.18	ACBD5	14.2941	15.4099	17.3579	9.5427	9.72519	11.3343	ENSG00000107897.18	ACBD5	chr10:27195213-27242130	MB231_CTRL	MB231_W2	OK	15.6873	10.2007	-0.620922	-3.31499	5e-05	0.000503098	yes
ENSG00000107938.17	EDRF1	6.54517	6.2697	9.21925	16.1512	15.799	14.1118	ENSG00000107938.17	EDRF1	chr10:125683228-125764143	MB231_CTRL	MB231_W2	OK	7.3447	15.354	1.06384	2.77434	5e-05	0.000503098	yes
ENSG00000107957.16	SH3PXD2A	8.55274	10.2483	9.90644	12.1516	15.1146	15.8841	ENSG00000107957.16	SH3PXD2A	chr10:103594026-103855543	MB231_CTRL	MB231_W2	OK	9.56917	14.3834	0.587943	3.52065	5e-05	0.000503098	yes
ENSG00000107960.10	OBFC1	14.304	17.3684	15.8483	11.192	13.7998	12.565	ENSG00000107960.10	OBFC1	chr10:103882541-103918205	MB231_CTRL	MB231_W2	OK	15.8402	12.5189	-0.339482	-1.60824	0.0055	0.0277775	yes
ENSG00000108055.9	SMC3	26.8386	31.2578	35.0946	21.2874	19.6718	19.0132	ENSG00000108055.9	SMC3	chr10:110567690-110604636	MB231_CTRL	MB231_W2	OK	31.0636	19.9908	-0.63589	-3.8276	5e-05	0.000503098	yes
ENSG00000108091.10	CCDC6	19.2681	21.3325	20.374	13.8517	14.8993	13.9235	ENSG00000108091.10	CCDC6	chr10:59788762-59906656	MB231_CTRL	MB231_W2	OK	20.3248	14.2248	-0.514831	-2.53613	5e-05	0.000503098	yes
ENSG00000108100.17	CCNY	23.2173	26.5036	27.8129	17.4063	20.127	17.1321	ENSG00000108100.17	CCNY	chr10:35247024-35572669	MB231_CTRL	MB231_W2	OK	25.8446	18.2218	-0.504197	-1.98744	0.0003	0.00245627	yes
ENSG00000108219.14	TSPAN14	45.9094	50.0066	41.2785	31.2968	27.5919	29.4802	ENSG00000108219.14	TSPAN14	chr10:80454165-80535942	MB231_CTRL	MB231_W2	OK	45.7315	29.4563	-0.634611	-2.64287	5e-05	0.000503098	yes
ENSG00000108342.12	CSF3	2.31963	1.84332	1.97834	6.38091	9.36762	10.2074	ENSG00000108342.12	CSF3	chr17:40015360-40017813	MB231_CTRL	MB231_W2	OK	2.0471	8.65196	2.07945	2.74177	5e-05	0.000503098	yes
ENSG00000108344.14	PSMD3	59.663	64.1846	63.6885	32.651	44.6882	37.5337	ENSG00000108344.14	PSMD3	chr17:39980796-39997960	MB231_CTRL	MB231_W2	OK	62.512	38.291	-0.70713	-4.18929	5e-05	0.000503098	yes
ENSG00000108352.11	RAPGEFL1	0.575286	0.584678	0.256247	2.58088	2.85467	5.29438	ENSG00000108352.11	RAPGEFL1	chr17:40177009-40195656	MB231_CTRL	MB231_W2	OK	0.47207	3.57665	2.92153	1.00499	5e-05	0.000503098	yes
ENSG00000108406.9	DHX40	11.0007	12.3509	10.8093	16.4636	15.0761	17.8734	ENSG00000108406.9	DHX40	chr17:59565524-59608345	MB231_CTRL	MB231_W2	OK	11.387	16.471	0.532549	1.50178	0.0078	0.0366223	yes
ENSG00000108433.15	GOSR2	15.6372	16.1604	15.4012	17.6345	25.2596	29.2956	ENSG00000108433.15	GOSR2	chr17:46923116-47100323	MB231_CTRL	MB231_W2	OK	15.7329	24.0632	0.613041	2.15448	0.0001	0.000939965	yes
ENSG00000108465.14	CDK5RAP3	8.03729	12.5191	10.9126	43.4729	35.9003	45.6474	ENSG00000108465.14	CDK5RAP3	chr17:47941505-47996196	MB231_CTRL	MB231_W2	OK	10.4897	41.6735	1.99016	4.05592	5e-05	0.000503098	yes
ENSG00000108468.14	CBX1	49.7849	56.9995	71.2173	38.784	34.9456	40.3911	ENSG00000108468.14	CBX1	chr17:48070051-48101521	MB231_CTRL	MB231_W2	OK	59.3339	38.0402	-0.64133	-3.3373	5e-05	0.000503098	yes
ENSG00000108469.14	RECQL5	4.61369	4.55125	6.63743	16.6052	10.5415	14.2415	ENSG00000108469.14	RECQL5	chr17:75626844-75708062	MB231_CTRL	MB231_W2	OK	5.26746	13.7961	1.38908	1.86557	5e-05	0.000503098	yes
ENSG00000108515.17	ENO3	1.15105	1.23362	0.995832	5.78096	2.2115	6.35387	ENSG00000108515.17	ENO3	chr17:4945651-4957131	MB231_CTRL	MB231_W2	OK	1.12683	4.78211	2.08537	0.499104	0.00145	0.00933362	yes
ENSG00000108578.14	BLMH	24.8717	27.7703	24.5276	17.7159	16.5869	20.3892	ENSG00000108578.14	BLMH	chr17:30238740-30292056	MB231_CTRL	MB231_W2	OK	25.7232	18.2307	-0.496704	-1.38259	0.0097	0.0435183	yes
ENSG00000108582.11	CPD	48.244	66.2605	55.5264	26.072	35.0159	30.7833	ENSG00000108582.11	CPD	chr17:30378904-30469989	MB231_CTRL	MB231_W2	OK	56.677	30.6237	-0.888113	-2.09445	0.0009	0.00624357	yes
ENSG00000108588.13	CCDC47	53.2736	49.579	53.5266	38.9437	33.816	30.1322	ENSG00000108588.13	CCDC47	chr17:63702831-63819317	MB231_CTRL	MB231_W2	OK	52.1264	34.2973	-0.603919	-1.65667	0.00295	0.0166971	yes
ENSG00000108639.7	SYNGR2	162.532	161.253	141.55	86.0275	113.217	119.155	ENSG00000108639.7	SYNGR2	chr17:78168557-78173527	MB231_CTRL	MB231_W2	OK	155.112	106.133	-0.547433	-3.32111	5e-05	0.000503098	yes
ENSG00000108671.9	PSMD11	59.4632	55.0639	57.4123	47.2862	51.7833	37.6981	ENSG00000108671.9	PSMD11	chr17:32423970-32483318	MB231_CTRL	MB231_W2	OK	57.3132	45.5892	-0.330175	-1.54432	0.0069	0.0331956	yes
ENSG00000108679.12	LGALS3BP	195.588	200.112	183.6	119.535	138.514	135.093	ENSG00000108679.12	LGALS3BP	chr17:78971237-78980109	MB231_CTRL	MB231_W2	OK	193.1	131.047	-0.559261	-3.06871	5e-05	0.000503098	yes
ENSG00000108771.12	DHX58	3.28655	2.18685	2.01825	4.19745	9.33942	5.14876	ENSG00000108771.12	DHX58	chr17:42101403-42112733	MB231_CTRL	MB231_W2	OK	2.49722	6.22854	1.31857	2.0113	5e-05	0.000503098	yes
ENSG00000108774.14	RAB5C	118.583	127.652	118.652	81.656	98.6385	89.0528	ENSG00000108774.14	RAB5C	chr17:42113107-42155972	MB231_CTRL	MB231_W2	OK	121.629	89.7825	-0.437981	-1.84011	0.0026	0.0150954	yes
ENSG00000108788.11	MLX	19.1078	21.0331	19.5174	27.7547	39.0475	34.1618	ENSG00000108788.11	MLX	chr17:42567067-42577831	MB231_CTRL	MB231_W2	OK	19.8861	33.6547	0.759048	2.75177	5e-05	0.000503098	yes
ENSG00000108797.11	CNTNAP1	1.8501	1.8179	2.25501	3.84428	3.31842	3.90494	ENSG00000108797.11	CNTNAP1	chr17:42678888-42699814	MB231_CTRL	MB231_W2	OK	1.97434	3.68922	0.901946	1.26256	0.0071	0.0339979	yes
ENSG00000108799.12	EZH1	8.30472	6.57988	8.99051	13.138	18.5341	14.8881	ENSG00000108799.12	EZH1	chr17:42700274-42745049	MB231_CTRL	MB231_W2	OK	7.95837	15.5201	0.963591	1.77454	0.0005	0.00379645	yes
ENSG00000108821.13	COL1A1	0.977656	2.25754	1.35291	3.6881	4.03869	2.67377	ENSG00000108821.13	COL1A1	chr17:50183288-50201632	MB231_CTRL	MB231_W2	OK	1.52937	3.46685	1.18069	0.828228	0.00585	0.0291483	yes
ENSG00000108828.15	VAT1	77.1593	85.7252	80.9069	26.4045	36.8423	35.9182	ENSG00000108828.15	VAT1	chr17:43014604-43025123	MB231_CTRL	MB231_W2	OK	81.2638	33.055	-1.29774	-5.62118	5e-05	0.000503098	yes
ENSG00000108829.9	LRRC59	126.442	131.396	137.271	68.8485	83.5055	78.4769	ENSG00000108829.9	LRRC59	chr17:50373219-50397888	MB231_CTRL	MB231_W2	OK	131.703	76.9436	-0.775416	-4.61759	5e-05	0.000503098	yes
ENSG00000108846.15	ABCC3	10.2129	14.7584	12.0353	31.353	42.5332	40.4061	ENSG00000108846.15	ABCC3	chr17:50634776-50692252	MB231_CTRL	MB231_W2	OK	12.3355	38.0974	1.62687	3.97056	5e-05	0.000503098	yes
ENSG00000108848.15	LUC7L3	29.4697	26.5052	32.6016	60.7408	75.6461	70.39	ENSG00000108848.15	LUC7L3	chr17:50719543-50756213	MB231_CTRL	MB231_W2	OK	29.5255	68.9256	1.22308	2.28832	5e-05	0.000503098	yes
ENSG00000108946.14	PRKAR1A	187.222	183.586	199.185	117.466	122.872	123.517	ENSG00000108946.14	PRKAR1A	chr17:68259181-68763882	MB231_CTRL	MB231_W2	OK	189.998	121.285	-0.647586	-2.28478	0.00015	0.00134259	yes
ENSG00000108953.16	YWHAE	536.311	538.559	568.489	285.022	384.599	346.874	ENSG00000108953.16	YWHAE	chr17:1344271-1400378	MB231_CTRL	MB231_W2	OK	547.786	338.832	-0.693045	-3.09595	5e-05	0.000503098	yes
ENSG00000108960.7	MMD	18.2775	15.8994	14.9211	25.8525	24.6917	20.7264	ENSG00000108960.7	MMD	chr17:55392612-55421992	MB231_CTRL	MB231_W2	OK	16.366	23.7569	0.537645	2.40326	5e-05	0.000503098	yes
ENSG00000109046.14	WSB1	30.3422	26.6224	31.6315	44.3624	45.5554	45.3314	ENSG00000109046.14	WSB1	chr17:27294075-27315926	MB231_CTRL	MB231_W2	OK	29.532	45.0831	0.610306	2.02038	0.00115	0.00769031	yes
ENSG00000109063.14	MYH3	0.474105	0.24824	0.360491	3.5064	0.952405	3.88463	ENSG00000109063.14	MYH3	chr17:10628525-10657309	MB231_CTRL	MB231_W2	OK	0.360945	2.78114	2.94583	0.973682	0.00625	0.0307207	yes
ENSG00000109065.11	NAT9	9.60473	11.4293	9.72724	27.0141	30.0175	28.3528	ENSG00000109065.11	NAT9	chr17:74770546-74776367	MB231_CTRL	MB231_W2	OK	10.2538	28.4615	1.47286	3.97124	5e-05	0.000503098	yes
ENSG00000109083.13	IFT20	18.2291	18.7651	24.4411	30.5628	26.5129	35.8667	ENSG00000109083.13	IFT20	chr17:28319094-28335489	MB231_CTRL	MB231_W2	OK	20.4784	30.9808	0.597269	1.58484	0.00425	0.0225604	yes
ENSG00000109089.7	CDR2L	14.6689	15.9371	14.4653	5.98548	9.5393	7.11609	ENSG00000109089.7	CDR2L	chr17:74987631-75005800	MB231_CTRL	MB231_W2	OK	15.0238	7.54695	-0.993281	-5.0909	5e-05	0.000503098	yes
ENSG00000109099.13	PMP22	37.2275	34.7988	37.5388	29.1945	30.6565	29.0908	ENSG00000109099.13	PMP22	chr17:15229776-15265707	MB231_CTRL	MB231_W2	OK	36.5217	29.6473	-0.300855	-1.46389	0.0085	0.0391988	yes
ENSG00000109184.14	DCUN1D4	14.1884	17.3742	13.9716	27.3447	24.4956	28.2081	ENSG00000109184.14	DCUN1D4	chr4:51842999-51916837	MB231_CTRL	MB231_W2	OK	15.1781	26.6828	0.813922	2.18692	5e-05	0.000503098	yes
ENSG00000109270.12	LAMTOR3	18.6021	19.8964	22.1347	22.6721	38.1644	31.1934	ENSG00000109270.12	LAMTOR3	chr4:99878335-99894490	MB231_CTRL	MB231_W2	OK	20.2111	30.6766	0.601994	2.28354	5e-05	0.000503098	yes
ENSG00000109320.11	NFKB1	13.5067	14.1222	11.8553	7.19394	7.92126	12.2895	ENSG00000109320.11	NFKB1	chr4:102501328-102617302	MB231_CTRL	MB231_W2	OK	13.1614	9.1349	-0.526852	-1.23384	0.0115	0.0495779	yes
ENSG00000109321.10	AREG	23.6473	27.3553	27.5251	32.4002	33.6763	40.8073	ENSG00000109321.10	AREG	chr4:74445133-74455009	MB231_CTRL	MB231_W2	OK	26.1759	35.6279	0.44477	2.52241	5e-05	0.000503098	yes
ENSG00000109381.19	ELF2	10.6379	10.1655	10.6321	14.6842	17.5071	15.2845	ENSG00000109381.19	ELF2	chr4:139015788-139177218	MB231_CTRL	MB231_W2	OK	10.4785	15.8252	0.594794	1.9059	0.0004	0.00314441	yes
ENSG00000109390.11	NDUFC1	41.5556	33.6128	39.1411	61.3072	71.9874	80.9622	ENSG00000109390.11	NDUFC1	chr4:139266162-139476609	MB231_CTRL	MB231_W2	OK	38.1032	71.4189	0.906395	1.80241	0.00325	0.018039	yes
ENSG00000109436.7	TBC1D9	10.1683	12.303	12.1419	7.23473	8.01011	7.524	ENSG00000109436.7	TBC1D9	chr4:140620764-140756120	MB231_CTRL	MB231_W2	OK	11.5377	7.58961	-0.604259	-1.92407	0.0004	0.00314441	yes
ENSG00000109445.10	ZNF330	11.5946	14.6583	13.2251	15.614	18.6382	20.2163	ENSG00000109445.10	ZNF330	chr4:141220886-141234697	MB231_CTRL	MB231_W2	OK	13.1594	18.1562	0.464371	1.41109	0.01	0.0445317	yes
ENSG00000109452.12	INPP4B	24.6412	29.5329	26.0388	14.0159	13.5465	21.7413	ENSG00000109452.12	INPP4B	chr4:142023159-142847432	MB231_CTRL	MB231_W2	OK	26.7377	16.4346	-0.702141	-1.86343	0.0002	0.00172918	yes
ENSG00000109475.16	RPL34	251.092	246.543	204.716	396.02	385.737	427.328	ENSG00000109475.16	RPL34	chr4:108620565-108630412	MB231_CTRL	MB231_W2	OK	234.117	403.028	0.783653	4.33864	5e-05	0.000503098	yes
ENSG00000109534.16	GAR1	6.76056	9.64637	8.89132	5.36107	3.25498	5.59463	ENSG00000109534.16	GAR1	chr4:109815509-109824740	MB231_CTRL	MB231_W2	OK	8.43275	4.73689	-0.832062	-2.684	5e-05	0.000503098	yes
ENSG00000109572.13	CLCN3	35.5198	40.1588	37.4221	18.6948	22.9577	17.3287	ENSG00000109572.13	CLCN3	chr4:169612632-169723673	MB231_CTRL	MB231_W2	OK	37.7002	19.6604	-0.939281	-2.81239	5e-05	0.000503098	yes
ENSG00000109576.13	AADAT	1.21837	1.49074	1.79691	4.00867	3.28651	2.38892	ENSG00000109576.13	AADAT	chr4:170060221-170091699	MB231_CTRL	MB231_W2	OK	1.50201	3.22803	1.10376	1.40264	0.00215	0.0128963	yes
ENSG00000109586.11	GALNT7	25.3101	29.2275	28.5055	17.5712	19.4164	16.8001	ENSG00000109586.11	GALNT7	chr4:173131927-173329694	MB231_CTRL	MB231_W2	OK	27.681	17.9292	-0.626584	-2.54059	5e-05	0.000503098	yes
ENSG00000109606.12	DHX15	73.0314	81.7285	84.2679	102.164	108.937	124.986	ENSG00000109606.12	DHX15	chr4:24517440-24584550	MB231_CTRL	MB231_W2	OK	79.6759	112.029	0.491655	2.07014	0.0004	0.00314441	yes
ENSG00000109654.14	TRIM2	13.9107	13.9793	11.8511	7.51337	6.37398	7.64249	ENSG00000109654.14	TRIM2	chr4:153152341-153339320	MB231_CTRL	MB231_W2	OK	13.247	7.17661	-0.884295	-1.74637	0.0004	0.00314441	yes
ENSG00000109674.3	NEIL3	10.943	11.2867	10.1009	14.4893	17.4495	16.7424	ENSG00000109674.3	NEIL3	chr4:177309835-177362943	MB231_CTRL	MB231_W2	OK	10.7769	16.2271	0.59047	2.70362	5e-05	0.000503098	yes
ENSG00000109689.14	STIM2	6.13233	8.03757	6.85773	19.2252	8.05918	12.118	ENSG00000109689.14	STIM2	chr4:26857677-27025381	MB231_CTRL	MB231_W2	OK	7.00921	13.1341	0.905997	1.91757	0.00195	0.0118792	yes
ENSG00000109705.7	NKX3-2	1.42656	1.14977	1.40469	2.84701	1.5692	2.90008	ENSG00000109705.7	NKX3-2	chr4:13540829-13545050	MB231_CTRL	MB231_W2	OK	1.32701	2.43876	0.877973	1.68783	0.0065	0.0316088	yes
ENSG00000109787.12	KLF3	13.7287	16.6319	16.45	10.3128	9.84112	10.2764	ENSG00000109787.12	KLF3	chr4:38612700-38701042	MB231_CTRL	MB231_W2	OK	15.6035	10.1435	-0.621323	-2.57355	5e-05	0.000503098	yes
ENSG00000109790.16	KLHL5	26.0559	29.1418	30.8894	20.8901	22.4652	26.062	ENSG00000109790.16	KLHL5	chr4:39045038-39126857	MB231_CTRL	MB231_W2	OK	28.6957	23.1391	-0.310505	-1.80673	0.00235	0.0138868	yes
ENSG00000109814.11	UGDH	25.0925	36.2997	34.3298	16.1284	18.0422	14.5986	ENSG00000109814.11	UGDH	chr4:39498754-39639090	MB231_CTRL	MB231_W2	OK	31.9073	16.2564	-0.97288	-2.74576	5e-05	0.000503098	yes
ENSG00000109819.8	PPARGC1A	1.29805	1.80608	1.50992	4.23941	1.14829	9.68153	ENSG00000109819.8	PPARGC1A	chr4:23560922-23904089	MB231_CTRL	MB231_W2	OK	1.53802	5.02308	1.7075	0.904472	0.0013	0.00851582	yes
ENSG00000109861.15	CTSC	43.7942	52.9337	51.5116	30.229	37.553	29.2197	ENSG00000109861.15	CTSC	chr11:88293591-88337787	MB231_CTRL	MB231_W2	OK	49.4132	32.3339	-0.611848	-2.44739	5e-05	0.000503098	yes
ENSG00000109920.12	FNBP4	51.7118	46.4287	58.6829	80.3652	89.5032	92.5016	ENSG00000109920.12	FNBP4	chr11:47716516-47767443	MB231_CTRL	MB231_W2	OK	52.2745	87.4567	0.742462	2.09499	0.0002	0.00172918	yes
ENSG00000109971.13	HSPA8	1269.58	1421.49	1322.46	834.162	901.523	786.705	ENSG00000109971.13	HSPA8	chr11:123057488-123063230	MB231_CTRL	MB231_W2	OK	1337.84	840.796	-0.67008	-2.41852	5e-05	0.000503098	yes
ENSG00000110047.17	EHD1	211.508	215.106	212.346	109.972	119.263	111.139	ENSG00000110047.17	EHD1	chr11:64851641-64888296	MB231_CTRL	MB231_W2	OK	212.987	113.458	-0.908606	-4.36877	5e-05	0.000503098	yes
ENSG00000110092.3	CCND1	266.703	281.418	281.015	210.791	236.791	226.39	ENSG00000110092.3	CCND1	chr11:69641086-69675416	MB231_CTRL	MB231_W2	OK	276.378	224.658	-0.298918	-1.48828	0.009	0.0409606	yes
ENSG00000110104.11	CCDC86	32.1627	33.3938	30.1761	17.1372	25.6297	19.3263	ENSG00000110104.11	CCDC86	chr11:60835995-60855971	MB231_CTRL	MB231_W2	OK	31.9109	20.6977	-0.624578	-3.67201	5e-05	0.000503098	yes
ENSG00000110108.9	TMEM109	55.2524	58.6647	55.2399	34.8064	39.7551	40.0957	ENSG00000110108.9	TMEM109	chr11:60913165-60952530	MB231_CTRL	MB231_W2	OK	56.3857	38.2191	-0.561036	-2.49049	5e-05	0.000503098	yes
ENSG00000110171.18	TRIM3	6.94486	8.06265	7.50513	16.7407	16.9372	24.2658	ENSG00000110171.18	TRIM3	chr11:6448612-6474459	MB231_CTRL	MB231_W2	OK	7.50421	19.3146	1.36392	2.41286	5e-05	0.000503098	yes
ENSG00000110218.8	PANX1	27.4216	30.8265	30.3784	17.4642	22.2211	18.1026	ENSG00000110218.8	PANX1	chr11:94128927-94181972	MB231_CTRL	MB231_W2	OK	29.5421	19.2627	-0.616968	-3.67556	5e-05	0.000503098	yes
ENSG00000110237.3	ARHGEF17	6.80804	5.56644	8.66112	10.1432	15.5892	15.8542	ENSG00000110237.3	ARHGEF17	chr11:73307234-73369091	MB231_CTRL	MB231_W2	OK	7.01187	13.8622	0.983285	2.20307	0.00015	0.00134259	yes
ENSG00000110274.14	CEP164	9.34962	12.2324	13.0272	25.8643	23.1088	29.5868	ENSG00000110274.14	CEP164	chr11:117232624-117413268	MB231_CTRL	MB231_W2	OK	11.5364	26.1866	1.18264	1.90501	0.0012	0.00797254	yes
ENSG00000110328.5	GALNT18	10.8459	13.4804	13.3979	5.94522	9.65404	8.60765	ENSG00000110328.5	GALNT18	chr11:11270875-11622005	MB231_CTRL	MB231_W2	OK	12.5747	8.06897	-0.640071	-2.95851	5e-05	0.000503098	yes
ENSG00000110367.11	DDX6	55.307	61.5868	63.0122	40.7812	45.0168	44.4479	ENSG00000110367.11	DDX6	chr11:118704606-118791149	MB231_CTRL	MB231_W2	OK	59.9686	43.4153	-0.466005	-2.25342	0.00025	0.00209262	yes
ENSG00000110395.6	CBL	10.9244	12.0014	12.2105	7.94072	8.47853	9.56857	ENSG00000110395.6	CBL	chr11:119206275-119321521	MB231_CTRL	MB231_W2	OK	11.7121	8.66261	-0.435123	-1.56556	0.00135	0.00878859	yes
ENSG00000110400.10	NECTIN1	5.06648	6.12899	6.14971	2.25415	4.72095	3.15278	ENSG00000110400.10	NECTIN1	chr11:119608422-119729084	MB231_CTRL	MB231_W2	OK	5.78173	3.37596	-0.776203	-1.40528	0.0061	0.0301321	yes
ENSG00000110455.13	ACCS	1.19569	0.807867	1.37784	4.23903	3.0176	6.19639	ENSG00000110455.13	ACCS	chr11:44065924-44084222	MB231_CTRL	MB231_W2	OK	1.12713	4.48434	1.99224	1.17691	0.0009	0.00624357	yes
ENSG00000110583.12	NAA40	6.31128	5.85759	9.44905	15.0799	23.5121	15.5765	ENSG00000110583.12	NAA40	chr11:63938958-63957328	MB231_CTRL	MB231_W2	OK	7.20597	18.0561	1.32522	2.8571	5e-05	0.000503098	yes
ENSG00000110651.11	CD81	107.477	120.216	114.518	73.229	78.4702	68.1478	ENSG00000110651.11	CD81	chr11:2328748-2397419	MB231_CTRL	MB231_W2	OK	114.071	73.2823	-0.638389	-3.57598	5e-05	0.000503098	yes
ENSG00000110660.14	SLC35F2	42.712	48.7773	45.6089	31.7046	42.5798	37.3642	ENSG00000110660.14	SLC35F2	chr11:107790990-107928293	MB231_CTRL	MB231_W2	OK	45.6994	37.2162	-0.296245	-1.61934	0.00575	0.0287713	yes
ENSG00000110700.6	RPS13	436.56	446.556	417.1	746.631	895.179	856.878	ENSG00000110700.6	RPS13	chr11:17074388-17207983	MB231_CTRL	MB231_W2	OK	433.405	832.896	0.942419	5.04881	5e-05	0.000503098	yes
ENSG00000110711.9	AIP	17.8959	20.2816	17.7022	9.0412	14.7505	12.2089	ENSG00000110711.9	AIP	chr11:67483040-67491103	MB231_CTRL	MB231_W2	OK	18.6266	12.0002	-0.634304	-2.86899	5e-05	0.000503098	yes
ENSG00000110719.9	TCIRG1	22.9937	22.2448	26.7777	73.5849	80.3156	94.5457	ENSG00000110719.9	TCIRG1	chr11:68039015-68121444	MB231_CTRL	MB231_W2	OK	24.0054	82.8154	1.78654	4.27527	5e-05	0.000503098	yes
ENSG00000110768.11	GTF2H1	34.1577	32.6113	35.8347	48.2477	50.1864	46.9025	ENSG00000110768.11	GTF2H1	chr11:18322294-18367044	MB231_CTRL	MB231_W2	OK	34.2012	48.4455	0.502316	1.75477	0.00165	0.0103809	yes
ENSG00000110844.13	PRPF40B	1.95776	1.53947	2.51776	7.29716	13.0099	7.6101	ENSG00000110844.13	PRPF40B	chr12:49568217-49764934	MB231_CTRL	MB231_W2	OK	2.005	9.30571	2.21452	0.829694	0.00065	0.00473038	yes
ENSG00000110852.4	CLEC2B	1.28464	1.2282	1.66723	3.03152	2.18897	2.98759	ENSG00000110852.4	CLEC2B	chr12:9852983-9870136	MB231_CTRL	MB231_W2	OK	1.39336	2.73603	0.973518	1.39357	0.005	0.025747	yes
ENSG00000110880.10	CORO1C	114.974	124.644	120.707	76.1879	91.6832	86.8649	ENSG00000110880.10	CORO1C	chr12:108645108-108731596	MB231_CTRL	MB231_W2	OK	120.108	84.912	-0.500296	-1.98233	0.00065	0.00473038	yes
ENSG00000110888.17	CAPRIN2	4.17271	3.33987	5.82448	20.3489	25.0576	26.7	ENSG00000110888.17	CAPRIN2	chr12:30709551-30754951	MB231_CTRL	MB231_W2	OK	4.44569	24.0355	2.43469	4.79882	5e-05	0.000503098	yes
ENSG00000110911.14	SLC11A2	19.3887	26.661	24.2303	39.8057	31.6254	33.6543	ENSG00000110911.14	SLC11A2	chr12:50979400-51028566	MB231_CTRL	MB231_W2	OK	23.4267	35.0285	0.580378	1.74764	0.00065	0.00473038	yes
ENSG00000110917.7	MLEC	53.62	66.8239	70.5289	44.5965	40.1025	38.8537	ENSG00000110917.7	MLEC	chr12:120686868-120701864	MB231_CTRL	MB231_W2	OK	63.6576	41.1842	-0.628241	-1.93801	0.00145	0.00933362	yes
ENSG00000110955.8	ATP5B	235.413	255.423	249.398	186.77	152.981	166.482	ENSG00000110955.8	ATP5B	chr12:56638174-56646068	MB231_CTRL	MB231_W2	OK	246.745	168.744	-0.548179	-2.20383	0.00035	0.00280437	yes
ENSG00000110958.15	PTGES3	178.058	196.258	204.066	162.337	146.98	160.466	ENSG00000110958.15	PTGES3	chr12:56663340-56688408	MB231_CTRL	MB231_W2	OK	192.794	156.594	-0.300031	-1.81208	0.0014	0.00906419	yes
ENSG00000111057.10	KRT18	133.187	145.229	131.905	87.9811	90.9213	94.2092	ENSG00000111057.10	KRT18	chr12:52897186-52952901	MB231_CTRL	MB231_W2	OK	136.774	91.0372	-0.587262	-1.89594	0.00055	0.0041207	yes
ENSG00000111142.13	METAP2	47.2496	57.5115	60.5939	31.5215	31.8263	33.3641	ENSG00000111142.13	METAP2	chr12:95473519-95515839	MB231_CTRL	MB231_W2	OK	55.1184	32.2373	-0.773801	-2.40002	5e-05	0.000503098	yes
ENSG00000111144.9	LTA4H	38.4267	38.9464	41.4185	19.9363	19.2578	25.2256	ENSG00000111144.9	LTA4H	chr12:95996520-96043520	MB231_CTRL	MB231_W2	OK	39.5972	21.4732	-0.882858	-4.025	5e-05	0.000503098	yes
ENSG00000111145.7	ELK3	56.4079	64.2411	65.4906	47.0305	41.0139	46.6956	ENSG00000111145.7	ELK3	chr12:96194381-96269835	MB231_CTRL	MB231_W2	OK	62.0465	44.9133	-0.466207	-2.00702	0.001	0.00683457	yes
ENSG00000111196.9	MAGOHB	40.2435	45.4586	34.7778	48.4497	66.784	63.1879	ENSG00000111196.9	MAGOHB	chr12:10604189-10613623	MB231_CTRL	MB231_W2	OK	40.16	59.4739	0.566497	1.76927	0.00215	0.0128963	yes
ENSG00000111203.11	ITFG2	3.6321	5.74891	4.81874	9.94317	15.2517	20.9421	ENSG00000111203.11	ITFG2	chr12:1946053-2941140	MB231_CTRL	MB231_W2	OK	4.73325	15.379	1.70006	1.41138	0.0016	0.0101235	yes
ENSG00000111237.18	VPS29	84.6503	91.6447	87.5304	98.1	135.038	126.425	ENSG00000111237.18	VPS29	chr12:110491096-110532086	MB231_CTRL	MB231_W2	OK	87.9418	119.854	0.446662	2.43362	5e-05	0.000503098	yes
ENSG00000111247.14	RAD51AP1	14.819	14.4789	15.6983	31.3673	33	29.3285	ENSG00000111247.14	RAD51AP1	chr12:4538797-4560048	MB231_CTRL	MB231_W2	OK	14.9987	31.2319	1.05818	4.00667	5e-05	0.000503098	yes
ENSG00000111271.14	ACAD10	4.80652	2.75445	5.34346	8.56683	9.88336	14.9592	ENSG00000111271.14	ACAD10	chr12:111686055-111817529	MB231_CTRL	MB231_W2	OK	4.30147	11.1365	1.37239	1.48575	0.00045	0.00346901	yes
ENSG00000111275.12	ALDH2	17.0994	22.3448	18.6873	8.4492	9.99721	12.7256	ENSG00000111275.12	ALDH2	chr12:111686055-111817529	MB231_CTRL	MB231_W2	OK	19.3772	10.3907	-0.899069	-2.92223	5e-05	0.000503098	yes
ENSG00000111348.8	ARHGDIB	50.5682	55.9266	53.6433	78.8423	70.3922	78.1396	ENSG00000111348.8	ARHGDIB	chr12:14942016-14961728	MB231_CTRL	MB231_W2	OK	53.3794	75.7913	0.505751	2.07901	0.0002	0.00172918	yes
ENSG00000111364.15	DDX55	6.9654	9.03406	9.82832	16.5344	19.1702	23.3106	ENSG00000111364.15	DDX55	chr12:123602076-123662606	MB231_CTRL	MB231_W2	OK	8.60926	19.6717	1.19216	2.6534	5e-05	0.000503098	yes
ENSG00000111371.15	SLC38A1	61.6573	68.2775	66.9759	44.3483	44.6983	43.8471	ENSG00000111371.15	SLC38A1	chr12:46183062-46270017	MB231_CTRL	MB231_W2	OK	65.6369	44.2979	-0.567269	-2.20095	5e-05	0.000503098	yes
ENSG00000111554.14	MDM1	2.99276	2.92926	3.96627	7.40206	13.3197	7.02715	ENSG00000111554.14	MDM1	chr12:68272442-68332381	MB231_CTRL	MB231_W2	OK	3.2961	9.24963	1.48864	1.95154	5e-05	0.000503098	yes
ENSG00000111581.9	NUP107	25.7416	34.2355	32.5355	52.6218	46.9548	43.4728	ENSG00000111581.9	NUP107	chr12:68674370-68745809	MB231_CTRL	MB231_W2	OK	30.8376	47.6831	0.628791	1.78205	0.0015	0.00960482	yes
ENSG00000111640.14	GAPDH	1124.01	1318.65	1124.64	861.666	954.597	868.941	ENSG00000111640.14	GAPDH	chr12:6533926-6538374	MB231_CTRL	MB231_W2	OK	1189.1	895.068	-0.409798	-2.47364	5e-05	0.000503098	yes
ENSG00000111647.12	UHRF1BP1L	14.8544	15.6497	14.8892	12.1446	9.9308	10.8332	ENSG00000111647.12	UHRF1BP1L	chr12:100028454-100142848	MB231_CTRL	MB231_W2	OK	15.1311	10.9695	-0.464017	-1.47544	0.0037	0.0200658	yes
ENSG00000111653.19	ING4	2.91176	3.25003	3.97177	4.94001	4.24388	7.40714	ENSG00000111653.19	ING4	chr12:6650279-6663148	MB231_CTRL	MB231_W2	OK	3.37785	5.53034	0.711263	1.03857	0.00795	0.0371927	yes
ENSG00000111666.10	CHPT1	28.9381	28.0967	34.2184	18.1264	25.067	25.4963	ENSG00000111666.10	CHPT1	chr12:101696946-101744140	MB231_CTRL	MB231_W2	OK	30.4178	22.8966	-0.409782	-1.43391	0.0087	0.0399168	yes
ENSG00000111669.14	TPI1	458.909	502.796	444.053	328.219	367.692	355.811	ENSG00000111669.14	TPI1	chr12:6867118-6923698	MB231_CTRL	MB231_W2	OK	468.586	350.574	-0.418593	-2.26083	0.0001	0.000939965	yes
ENSG00000111678.10	C12orf57	53.5647	60.325	42.3014	57.8114	95.6755	92.2887	ENSG00000111678.10	C12orf57	chr12:6942977-6946003	MB231_CTRL	MB231_W2	OK	52.0637	81.9252	0.654028	2.90687	5e-05	0.000503098	yes
ENSG00000111711.9	GOLT1B	29.155	39.2947	33.0282	65.0537	77.7738	61.5703	ENSG00000111711.9	GOLT1B	chr12:21501780-21518408	MB231_CTRL	MB231_W2	OK	33.826	68.1326	1.01021	3.2373	5e-05	0.000503098	yes
ENSG00000111716.12	LDHB	341.223	379.313	400.206	224.84	236.894	265.274	ENSG00000111716.12	LDHB	chr12:21635341-21775581	MB231_CTRL	MB231_W2	OK	373.581	242.336	-0.624411	-3.18079	5e-05	0.000503098	yes
ENSG00000111725.10	PRKAB1	7.14245	8.40897	8.88696	16.5383	16.9827	10.2853	ENSG00000111725.10	PRKAB1	chr12:119334711-119681630	MB231_CTRL	MB231_W2	OK	8.14613	14.6021	0.841991	1.33304	0.00885	0.040453	yes
ENSG00000111731.12	C2CD5	5.30787	6.09297	6.98929	10.7343	11.0443	8.42658	ENSG00000111731.12	C2CD5	chr12:22448582-22544546	MB231_CTRL	MB231_W2	OK	6.13004	10.0684	0.715862	1.1107	0.00355	0.0194305	yes
ENSG00000111737.11	RAB35	31.2206	33.1779	32.5474	15.9371	24.7266	19.8208	ENSG00000111737.11	RAB35	chr12:120095094-120119000	MB231_CTRL	MB231_W2	OK	32.3153	20.1615	-0.680614	-3.39119	5e-05	0.000503098	yes
ENSG00000111790.13	FGFR1OP2	10.5752	11.8408	12.811	20.447	21.7409	20.8982	ENSG00000111790.13	FGFR1OP2	chr12:26938382-26966650	MB231_CTRL	MB231_W2	OK	11.7423	21.0287	0.840641	4.0364	5e-05	0.000503098	yes
ENSG00000111799.20	COL12A1	16.1833	18.7387	17.9777	8.57785	8.78749	13.0651	ENSG00000111799.20	COL12A1	chr6:75084325-75206051	MB231_CTRL	MB231_W2	OK	17.6332	10.1435	-0.797742	-2.24617	0.0001	0.000939965	yes
ENSG00000111843.13	TMEM14C	109.043	127.506	115.489	169.387	209.982	178.049	ENSG00000111843.13	TMEM14C	chr6:10722914-10731129	MB231_CTRL	MB231_W2	OK	117.346	185.806	0.663029	4.14272	5e-05	0.000503098	yes
ENSG00000111845.4	PAK1IP1	27.4774	28.9784	28.0277	18.8819	23.2081	21.5395	ENSG00000111845.4	PAK1IP1	chr6:10671417-10709782	MB231_CTRL	MB231_W2	OK	28.1612	21.2098	-0.408972	-2.21746	0.00015	0.00134259	yes
ENSG00000111850.10	SMIM8	2.39565	1.07084	2.26022	4.03892	2.89505	5.01434	ENSG00000111850.10	SMIM8	chr6:87282977-87399749	MB231_CTRL	MB231_W2	OK	1.9089	3.98277	1.06103	1.44221	0.00125	0.00825545	yes
ENSG00000111859.16	NEDD9	15.5872	18.1115	15.1084	10.9879	10.6439	11.0914	ENSG00000111859.16	NEDD9	chr6:11173451-11382348	MB231_CTRL	MB231_W2	OK	16.269	10.9077	-0.576778	-2.31074	5e-05	0.000503098	yes
ENSG00000111860.13	CEP85L	3.0153	2.99505	2.89418	6.20795	5.45684	5.40459	ENSG00000111860.13	CEP85L	chr6:118460771-118710075	MB231_CTRL	MB231_W2	OK	2.96818	5.68979	0.938799	1.43259	0.00085	0.00593698	yes
ENSG00000111897.6	SERINC1	55.5097	64.1236	66.1718	41.4638	45.5235	48.5522	ENSG00000111897.6	SERINC1	chr6:122443353-122471822	MB231_CTRL	MB231_W2	OK	61.935	45.1799	-0.455076	-2.82619	5e-05	0.000503098	yes
ENSG00000111911.6	HINT3	8.69829	8.27444	8.36577	5.03804	5.9256	6.20024	ENSG00000111911.6	HINT3	chr6:125956780-125980244	MB231_CTRL	MB231_W2	OK	8.44617	5.7213	-0.561955	-2.30431	5e-05	0.000503098	yes
ENSG00000111912.19	NCOA7	14.9333	12.4755	14.486	9.1275	11.2805	9.54211	ENSG00000111912.19	NCOA7	chr6:125781160-125932030	MB231_CTRL	MB231_W2	OK	13.9649	9.98337	-0.48421	-1.6689	0.0023	0.0136382	yes
ENSG00000112029.9	FBXO5	27.7723	31.7972	35.5765	40.5104	40.0433	39.8309	ENSG00000112029.9	FBXO5	chr6:152970518-153002685	MB231_CTRL	MB231_W2	OK	31.7153	40.1282	0.339436	1.77709	0.0017	0.0106371	yes
ENSG00000112039.3	FANCE	14.6699	15.9703	16.4676	9.54836	12.7086	11.5459	ENSG00000112039.3	FANCE	chr6:35452360-35467103	MB231_CTRL	MB231_W2	OK	15.7026	11.2676	-0.478827	-2.42752	5e-05	0.000503098	yes
ENSG00000112078.13	KCTD20	72.2336	80.8181	79.6604	48.8251	48.813	54.7375	ENSG00000112078.13	KCTD20	chr6:36354090-36491143	MB231_CTRL	MB231_W2	OK	77.5707	50.7919	-0.610914	-2.83778	5e-05	0.000503098	yes
ENSG00000112079.8	STK38	56.3819	63.2904	61.1826	44.2884	45.296	48.9792	ENSG00000112079.8	STK38	chr6:36493891-36547470	MB231_CTRL	MB231_W2	OK	60.285	46.1879	-0.384285	-2.33317	5e-05	0.000503098	yes
ENSG00000112130.16	RNF8	35.4968	34.2543	38.5619	24.8573	25.6257	28.7976	ENSG00000112130.16	RNF8	chr6:37353971-37394738	MB231_CTRL	MB231_W2	OK	36.1043	26.4268	-0.450168	-2.17647	0.0001	0.000939965	yes
ENSG00000112144.15	ICK	22.6297	23.4612	23.8918	18.929	16.7652	16.7725	ENSG00000112144.15	ICK	chr6:53001278-53100873	MB231_CTRL	MB231_W2	OK	23.3275	17.4889	-0.415597	-1.93819	0.00105	0.00712483	yes
ENSG00000112146.16	FBXO9	13.7768	15.6413	18.5148	33.2149	41.1873	37.3317	ENSG00000112146.16	FBXO9	chr6:53001278-53100873	MB231_CTRL	MB231_W2	OK	15.9777	37.2446	1.22098	2.21861	5e-05	0.000503098	yes
ENSG00000112149.9	CD83	10.9115	11.4581	10.2015	8.91608	8.46364	7.85406	ENSG00000112149.9	CD83	chr6:14117255-14136918	MB231_CTRL	MB231_W2	OK	10.857	8.41126	-0.368238	-1.64524	0.00455	0.0238848	yes
ENSG00000112186.11	CAP2	17.0383	16.7315	18.1805	11.7615	11.0796	14.0846	ENSG00000112186.11	CAP2	chr6:17393215-17557792	MB231_CTRL	MB231_W2	OK	17.3168	12.3086	-0.492504	-2.37464	5e-05	0.000503098	yes
ENSG00000112299.7	VNN1	1.1164	1.59498	1.36843	2.06912	1.71028	2.95391	ENSG00000112299.7	VNN1	chr6:132681589-132714049	MB231_CTRL	MB231_W2	OK	1.35994	2.24443	0.722812	1.75838	0.00435	0.0229688	yes
ENSG00000112305.14	SMAP1	14.5194	18.2563	19.3935	10.064	13.2462	14.4208	ENSG00000112305.14	SMAP1	chr6:70667775-70957038	MB231_CTRL	MB231_W2	OK	17.3897	12.577	-0.467447	-2.10674	0.0006	0.00442867	yes
ENSG00000112306.7	RPS12	400.367	366.789	292.854	609.109	754.895	767.298	ENSG00000112306.7	RPS12	chr6:132814440-132817564	MB231_CTRL	MB231_W2	OK	353.337	710.434	1.00766	6.24	5e-05	0.000503098	yes
ENSG00000112308.12	C6orf62	108.136	123.176	121.071	90.2026	103.61	100.463	ENSG00000112308.12	C6orf62	chr6:24667034-24720836	MB231_CTRL	MB231_W2	OK	117.461	98.0918	-0.259982	-1.48096	0.0088	0.0402439	yes
ENSG00000112312.9	GMNN	28.9973	36.2312	32.0949	38.0949	64.5283	55.3908	ENSG00000112312.9	GMNN	chr6:24774930-24786099	MB231_CTRL	MB231_W2	OK	32.4411	52.6713	0.699195	3.48274	5e-05	0.000503098	yes
ENSG00000112339.14	HBS1L	33.8509	35.521	38.9956	26.8309	24.7633	31.0856	ENSG00000112339.14	HBS1L	chr6:134960377-135103056	MB231_CTRL	MB231_W2	OK	36.1225	27.5599	-0.390324	-1.45066	0.0094	0.0424543	yes
ENSG00000112343.10	TRIM38	4.91909	5.16989	5.6812	7.03728	7.22968	7.78401	ENSG00000112343.10	TRIM38	chr6:25962801-26001775	MB231_CTRL	MB231_W2	OK	5.25673	7.35033	0.483644	2.70573	5e-05	0.000503098	yes
ENSG00000112378.11	PERP	31.3317	36.6796	37.1782	20.5801	24.5548	23.5174	ENSG00000112378.11	PERP	chr6:138088504-138107511	MB231_CTRL	MB231_W2	OK	35.0631	22.8841	-0.61561	-3.68556	5e-05	0.000503098	yes
ENSG00000112379.8	ARFGEF3	2.13569	2.37656	2.49171	1.38536	1.7721	1.11064	ENSG00000112379.8	ARFGEF3	chr6:138161920-138344663	MB231_CTRL	MB231_W2	OK	2.33465	1.4227	-0.714577	-3.36073	5e-05	0.000503098	yes
ENSG00000112406.4	HECA	5.78398	6.50989	6.79962	3.67322	4.27875	5.7112	ENSG00000112406.4	HECA	chr6:139135111-139292139	MB231_CTRL	MB231_W2	OK	6.36449	4.55439	-0.482787	-2.18324	0.00015	0.00134259	yes
ENSG00000112473.17	SLC39A7	73.4334	79.8092	79.0766	51.3142	57.6307	58.7149	ENSG00000112473.17	SLC39A7	chr6:33193587-33204439	MB231_CTRL	MB231_W2	OK	77.4397	55.8866	-0.470571	-2.33451	0.0002	0.00172918	yes
ENSG00000112511.17	PHF1	14.2744	17.3782	19.1196	28.0876	30.7117	32.6674	ENSG00000112511.17	PHF1	chr6:33410398-33418317	MB231_CTRL	MB231_W2	OK	16.9241	30.4889	0.849208	1.62844	0.00875	0.0400879	yes
ENSG00000112514.15	CUTA	213.186	248.988	227.214	175.217	186.833	199.062	ENSG00000112514.15	CUTA	chr6:33410398-33418317	MB231_CTRL	MB231_W2	OK	229.796	187.037	-0.297028	-1.55465	0.0066	0.0320046	yes
ENSG00000112531.16	QKI	62.7263	71.3087	76.3119	37.8724	37.3134	38.5364	ENSG00000112531.16	QKI	chr6:163413999-163578596	MB231_CTRL	MB231_W2	OK	70.1156	37.9074	-0.887257	-2.7882	5e-05	0.000503098	yes
ENSG00000112576.12	CCND3	102.195	101.661	94.4937	71.4141	71.9504	72.4245	ENSG00000112576.12	CCND3	chr6:41934932-42050357	MB231_CTRL	MB231_W2	OK	99.4498	71.9297	-0.467381	-2.16187	0.0002	0.00172918	yes
ENSG00000112578.9	BYSL	30.4051	30.3266	27.2275	18.4153	21.7842	20.3252	ENSG00000112578.9	BYSL	chr6:41921187-41933046	MB231_CTRL	MB231_W2	OK	29.3197	20.1749	-0.53931	-2.90701	5e-05	0.000503098	yes
ENSG00000112624.12	GLTSCR1L	8.92148	9.85632	8.99051	6.97462	8.1751	7.29192	ENSG00000112624.12	GLTSCR1L	chr6:42746957-42868560	MB231_CTRL	MB231_W2	OK	9.2561	7.48055	-0.307261	-1.6499	0.0033	0.0182709	yes
ENSG00000112658.7	SRF	34.1366	38.1209	38.9513	17.0474	25.0909	23.866	ENSG00000112658.7	SRF	chr6:43171298-43181507	MB231_CTRL	MB231_W2	OK	37.0696	22.0014	-0.75264	-4.73612	5e-05	0.000503098	yes
ENSG00000112659.13	CUL9	9.06153	8.52347	7.93132	20.308	22.6649	23.2852	ENSG00000112659.13	CUL9	chr6:43182174-43224587	MB231_CTRL	MB231_W2	OK	8.50544	22.086	1.37668	3.45789	5e-05	0.000503098	yes
ENSG00000112685.13	EXOC2	24.5058	32.1394	32.0147	15.9242	16.8639	24.2545	ENSG00000112685.13	EXOC2	chr6:485132-693111	MB231_CTRL	MB231_W2	OK	29.5533	19.0142	-0.636243	-1.84642	0.0031	0.0173617	yes
ENSG00000112695.11	COX7A2	184.884	163.763	158.567	323.312	299.484	356.279	ENSG00000112695.11	COX7A2	chr6:75237674-75250323	MB231_CTRL	MB231_W2	OK	169.072	326.358	0.94882	4.40658	5e-05	0.000503098	yes
ENSG00000112697.15	TMEM30A	134.13	147.757	155.639	96.1988	105.185	100.798	ENSG00000112697.15	TMEM30A	chr6:75252923-75284968	MB231_CTRL	MB231_W2	OK	145.842	100.727	-0.533952	-3.11196	5e-05	0.000503098	yes
ENSG00000112699.10	GMDS	16.9115	22.117	20.6109	11.6616	9.14126	19.6882	ENSG00000112699.10	GMDS	chr6:1623805-2245692	MB231_CTRL	MB231_W2	OK	19.8798	13.497	-0.558662	-1.56793	0.0042	0.0223325	yes
ENSG00000112715.20	VEGFA	76.0981	81.8111	78.6057	106.736	117.237	108.607	ENSG00000112715.20	VEGFA	chr6:43770183-43786487	MB231_CTRL	MB231_W2	OK	78.8383	110.86	0.491772	2.02764	0.0008	0.00564084	yes
ENSG00000112739.16	PRPF4B	27.6728	31.3482	30.8435	54.7058	51.8059	57.0862	ENSG00000112739.16	PRPF4B	chr6:4021266-4157385	MB231_CTRL	MB231_W2	OK	29.9549	54.5327	0.864331	2.63286	5e-05	0.000503098	yes
ENSG00000112759.16	SLC29A1	47.7759	56.9687	52.9476	30.9877	46.067	43.318	ENSG00000112759.16	SLC29A1	chr6:44219504-44234151	MB231_CTRL	MB231_W2	OK	52.5641	40.1243	-0.389602	-2.23902	5e-05	0.000503098	yes
ENSG00000112877.7	CEP72	5.72526	5.77721	7.57765	10.0429	8.75725	12.8084	ENSG00000112877.7	CEP72	chr5:612271-693395	MB231_CTRL	MB231_W2	OK	6.36004	10.5362	0.728241	1.54518	0.00425	0.0225604	yes
ENSG00000112941.13	PAPD7	28.6364	25.7297	29.8301	32.4631	52.0578	46.8972	ENSG00000112941.13	PAPD7	chr5:6713006-6757048	MB231_CTRL	MB231_W2	OK	28.0654	43.806	0.642336	2.22484	0.00035	0.00280437	yes
ENSG00000112983.17	BRD8	32.044	36.2254	36.3944	86.8934	88.7128	91.8876	ENSG00000112983.17	BRD8	chr5:138139765-138213343	MB231_CTRL	MB231_W2	OK	34.8879	89.1646	1.35374	2.77296	5e-05	0.000503098	yes
ENSG00000112996.10	MRPS30	24.8699	27.5308	28.754	18.6338	19.8433	22.792	ENSG00000112996.10	MRPS30	chr5:44808924-44820428	MB231_CTRL	MB231_W2	OK	27.0516	20.4231	-0.405515	-1.8133	0.00165	0.0103809	yes
ENSG00000113013.12	HSPA9	209.704	230.695	213.448	132.774	156.313	147.094	ENSG00000113013.12	HSPA9	chr5:138554881-138575444	MB231_CTRL	MB231_W2	OK	217.949	145.394	-0.584025	-2.09571	0.00015	0.00134259	yes
ENSG00000113083.12	LOX	24.2096	24.8894	22.4732	13.8279	15.5775	13.4626	ENSG00000113083.12	LOX	chr5:121961960-122078285	MB231_CTRL	MB231_W2	OK	23.8574	14.2893	-0.739499	-3.29318	5e-05	0.000503098	yes
ENSG00000113108.18	APBB3	1.18267	2.25926	1.1299	5.56947	8.21715	8.83191	ENSG00000113108.18	APBB3	chr5:140558267-140594570	MB231_CTRL	MB231_W2	OK	1.52394	7.53951	2.30666	0.883142	0.0002	0.00172918	yes
ENSG00000113240.12	CLK4	10.79	12.3225	13.3698	29.6777	28.7192	29.7313	ENSG00000113240.12	CLK4	chr5:178602663-178630615	MB231_CTRL	MB231_W2	OK	12.1608	29.3761	1.27241	4.61777	5e-05	0.000503098	yes
ENSG00000113273.15	ARSB	9.29589	14.033	10.1651	4.63129	8.68033	8.7804	ENSG00000113273.15	ARSB	chr5:78777208-78986087	MB231_CTRL	MB231_W2	OK	11.1647	7.36401	-0.600376	-1.79709	0.0019	0.0116365	yes
ENSG00000113300.11	CNOT6	22.6037	24.8331	27.5767	13.1878	16.9193	15.9942	ENSG00000113300.11	CNOT6	chr5:180494411-180578405	MB231_CTRL	MB231_W2	OK	25.0045	15.3671	-0.702345	-2.70089	5e-05	0.000503098	yes
ENSG00000113328.18	CCNG1	20.9579	24.827	18.8143	37.9733	37.1889	45.4048	ENSG00000113328.18	CCNG1	chr5:163437568-163446151	MB231_CTRL	MB231_W2	OK	21.5331	40.189	0.900248	2.63598	5e-05	0.000503098	yes
ENSG00000113384.13	GOLPH3	76.9473	78.7114	75.631	54.6711	56.0869	51.5452	ENSG00000113384.13	GOLPH3	chr5:32124703-32174350	MB231_CTRL	MB231_W2	OK	77.0966	54.1011	-0.51101	-3.20931	5e-05	0.000503098	yes
ENSG00000113387.11	SUB1	65.2663	66.6055	65.1041	107.508	104.127	102.804	ENSG00000113387.11	SUB1	chr5:32531632-32604079	MB231_CTRL	MB231_W2	OK	65.6586	104.813	0.674766	2.28994	0.0001	0.000939965	yes
ENSG00000113407.13	TARS	224.783	247.58	245.911	150.233	158.603	154.236	ENSG00000113407.13	TARS	chr5:33440695-33469539	MB231_CTRL	MB231_W2	OK	239.425	154.357	-0.633298	-2.88609	5e-05	0.000503098	yes
ENSG00000113441.15	LNPEP	16.6967	18.4958	20.4985	13.2112	12.1584	12.8897	ENSG00000113441.15	LNPEP	chr5:96814027-97037515	MB231_CTRL	MB231_W2	OK	18.5637	12.7531	-0.541635	-2.03193	0.00015	0.00134259	yes
ENSG00000113448.17	PDE4D	7.59924	9.25459	8.68871	7.01662	4.86077	5.88767	ENSG00000113448.17	PDE4D	chr5:58969037-60547657	MB231_CTRL	MB231_W2	OK	8.51418	5.92169	-0.52386	-1.12037	0.00345	0.018982	yes
ENSG00000113504.20	SLC12A7	8.84707	9.29142	8.83078	6.85178	4.62522	4.33746	ENSG00000113504.20	SLC12A7	chr5:1050375-1112035	MB231_CTRL	MB231_W2	OK	8.98976	5.27149	-0.770072	-2.02071	0.0005	0.00379645	yes
ENSG00000113558.18	SKP1	268.872	286.96	292.606	342.578	427.72	413.422	ENSG00000113558.18	SKP1	chr5:134114710-134371047	MB231_CTRL	MB231_W2	OK	282.813	394.573	0.480446	2.01086	0.00065	0.00473038	yes
ENSG00000113580.14	NR3C1	39.6756	42.4543	44.7514	25.3509	27.5128	28.8449	ENSG00000113580.14	NR3C1	chr5:143277930-143435512	MB231_CTRL	MB231_W2	OK	42.2938	27.2362	-0.634917	-2.95389	5e-05	0.000503098	yes
ENSG00000113583.7	C5orf15	55.7887	53.249	56.8144	61.5677	77.9712	67.1385	ENSG00000113583.7	C5orf15	chr5:133955501-133968787	MB231_CTRL	MB231_W2	OK	55.284	68.8925	0.317484	1.63812	0.00495	0.0255452	yes
ENSG00000113593.11	PPWD1	15.6409	13.5756	18.0747	29.6428	23.6602	32.726	ENSG00000113593.11	PPWD1	chr5:65563235-65587549	MB231_CTRL	MB231_W2	OK	15.7637	28.6764	0.863252	2.35174	5e-05	0.000503098	yes
ENSG00000113594.9	LIFR	14.3736	15.6393	15.4148	5.37895	10.8322	5.17994	ENSG00000113594.9	LIFR	chr5:38474962-38671216	MB231_CTRL	MB231_W2	OK	15.1426	7.13038	-1.08656	-2.31235	5e-05	0.000503098	yes
ENSG00000113597.17	TRAPPC13	4.26412	7.04604	4.76498	13.8145	7.67437	10.5468	ENSG00000113597.17	TRAPPC13	chr5:65589679-65871725	MB231_CTRL	MB231_W2	OK	5.35838	10.6786	0.994849	1.22621	0.01145	0.0494186	yes
ENSG00000113645.14	WWC1	33.3459	38.6158	33.5699	23.753	21.8052	24.3172	ENSG00000113645.14	WWC1	chr5:168291650-168472303	MB231_CTRL	MB231_W2	OK	35.1772	23.2918	-0.594819	-1.51849	0.0055	0.0277775	yes
ENSG00000113649.11	TCERG1	28.2977	39.9352	39.2399	59.6498	58.6627	65.1943	ENSG00000113649.11	TCERG1	chr5:146447310-146511961	MB231_CTRL	MB231_W2	OK	35.8243	61.1689	0.771861	2.19094	0.0003	0.00245627	yes
ENSG00000113716.12	HMGXB3	13.6909	14.6775	14.7409	22.2321	26.0709	36.705	ENSG00000113716.12	HMGXB3	chr5:149960736-150053142	MB231_CTRL	MB231_W2	OK	14.3698	28.336	0.979598	2.16291	0.00155	0.00984337	yes
ENSG00000113732.8	ATP6V0E1	106.036	135.782	128.929	131.619	174.722	175.521	ENSG00000113732.8	ATP6V0E1	chr5:172983756-173035445	MB231_CTRL	MB231_W2	OK	123.583	160.62	0.378181	1.7177	0.0033	0.0182709	yes
ENSG00000113761.11	ZNF346	4.83666	5.74682	6.33939	8.2741	8.83417	10.0067	ENSG00000113761.11	ZNF346	chr5:177022695-177081189	MB231_CTRL	MB231_W2	OK	5.64096	9.03833	0.680116	1.56414	0.0017	0.0106371	yes
ENSG00000113811.10	SELK	19.2451	22.4619	19.4423	22.5592	31.5252	26.7927	ENSG00000113811.10	SELK	chr3:53884409-53891988	MB231_CTRL	MB231_W2	OK	20.3831	26.959	0.403395	1.55378	0.00565	0.0283572	yes
ENSG00000113851.13	CRBN	13.718	14.5099	20.3517	22.5961	22.6031	26.816	ENSG00000113851.13	CRBN	chr3:3126915-3179710	MB231_CTRL	MB231_W2	OK	16.1932	24.0051	0.56795	1.53392	0.00555	0.0279814	yes
ENSG00000113966.9	ARL6	2.18701	3.25253	2.87502	5.18193	7.2634	7.48441	ENSG00000113966.9	ARL6	chr3:97764520-97821884	MB231_CTRL	MB231_W2	OK	2.77152	6.64325	1.26121	1.69047	5e-05	0.000503098	yes
ENSG00000113971.18	NPHP3	4.1844	4.5878	4.19367	6.64291	6.77875	9.09948	ENSG00000113971.18	NPHP3	chr3:132558137-132874223	MB231_CTRL	MB231_W2	OK	4.32196	7.50705	0.796561	1.33762	0.0092	0.0416604	yes
ENSG00000114021.11	NIT2	7.98008	12.0009	8.90765	12.8542	26.2001	15.2189	ENSG00000114021.11	NIT2	chr3:100334700-100361635	MB231_CTRL	MB231_W2	OK	9.62954	18.091	0.909737	1.84399	0.0011	0.00740172	yes
ENSG00000114030.12	KPNA1	25.1389	27.5568	28.1479	18.362	20.3474	22.3017	ENSG00000114030.12	KPNA1	chr3:122416206-122514945	MB231_CTRL	MB231_W2	OK	26.9479	20.337	-0.406063	-2.20967	0.00015	0.00134259	yes
ENSG00000114054.13	PCCB	14.8215	14.5735	13.2923	5.9425	7.54797	8.01256	ENSG00000114054.13	PCCB	chr3:136250305-136752403	MB231_CTRL	MB231_W2	OK	14.2291	7.16768	-0.989269	-2.10889	5e-05	0.000503098	yes
ENSG00000114107.8	CEP70	5.50236	6.56588	7.86863	20.0096	9.95868	9.05058	ENSG00000114107.8	CEP70	chr3:138494343-138594538	MB231_CTRL	MB231_W2	OK	6.64562	13.0063	0.968732	1.28526	0.0098	0.0438526	yes
ENSG00000114120.11	SLC25A36	16.545	17.2259	17.5125	33.7518	34.5315	47.5693	ENSG00000114120.11	SLC25A36	chr3:140941829-140979933	MB231_CTRL	MB231_W2	OK	17.0945	38.6175	1.17573	3.99324	5e-05	0.000503098	yes
ENSG00000114125.13	RNF7	37.4813	38.633	42.5404	49.2453	52.0276	55.8651	ENSG00000114125.13	RNF7	chr3:141738203-141747560	MB231_CTRL	MB231_W2	OK	39.5516	52.3794	0.405263	1.62244	0.0044	0.0231972	yes
ENSG00000114209.14	PDCD10	43.7735	41.4314	49.738	66.2842	87.7085	91.7879	ENSG00000114209.14	PDCD10	chr3:167683297-167734939	MB231_CTRL	MB231_W2	OK	44.981	81.9269	0.865022	3.96435	5e-05	0.000503098	yes
ENSG00000114268.11	PFKFB4	6.5437	7.23298	6.93869	8.33834	13.6263	8.64086	ENSG00000114268.11	PFKFB4	chr3:48517683-48563773	MB231_CTRL	MB231_W2	OK	6.90512	10.2018	0.56309	1.35868	0.00585	0.0291483	yes
ENSG00000114270.16	COL7A1	3.42285	3.716	6.27106	9.13188	9.87859	10.8716	ENSG00000114270.16	COL7A1	chr3:48564072-48595267	MB231_CTRL	MB231_W2	OK	4.46997	9.96068	1.15598	1.11072	0.00515	0.0263866	yes
ENSG00000114353.16	GNAI2	95.9888	105.429	93.0414	73.3708	73.4467	77.7723	ENSG00000114353.16	GNAI2	chr3:50226291-50259355	MB231_CTRL	MB231_W2	OK	98.153	74.8633	-0.390774	-2.29787	5e-05	0.000503098	yes
ENSG00000114405.10	C3orf14	5.11622	6.23502	5.12376	16.7629	16.2775	12.443	ENSG00000114405.10	C3orf14	chr3:61561568-62369330	MB231_CTRL	MB231_W2	OK	5.49167	15.1612	1.46506	1.56898	0.0082	0.0381313	yes
ENSG00000114450.9	GNB4	27.2252	28.6062	32.0377	22.877	19.1279	22.7743	ENSG00000114450.9	GNB4	chr3:179396088-179451590	MB231_CTRL	MB231_W2	OK	29.2897	21.5931	-0.439824	-2.51518	5e-05	0.000503098	yes
ENSG00000114480.12	GBE1	53.8026	64.1628	61.8705	46.4289	44.5631	45.3249	ENSG00000114480.12	GBE1	chr3:81489698-81762161	MB231_CTRL	MB231_W2	OK	59.9453	45.439	-0.399717	-2.13682	0.0003	0.00245627	yes
ENSG00000114529.12	C3orf52	2.81443	3.93232	3.58875	3.72778	6.64817	5.46022	ENSG00000114529.12	C3orf52	chr3:112086334-112133305	MB231_CTRL	MB231_W2	OK	3.44517	5.27872	0.615614	1.34597	0.0063	0.0308862	yes
ENSG00000114573.9	ATP6V1A	21.5859	21.6371	23.2737	10.6896	10.2239	12.9397	ENSG00000114573.9	ATP6V1A	chr3:113746871-113812056	MB231_CTRL	MB231_W2	OK	22.1656	11.2844	-0.97399	-4.42413	5e-05	0.000503098	yes
ENSG00000114626.17	ABTB1	4.40413	7.20881	5.77733	5.39688	16.9672	8.44205	ENSG00000114626.17	ABTB1	chr3:127672934-127680920	MB231_CTRL	MB231_W2	OK	5.79676	10.2687	0.824937	1.25936	0.0041	0.0218807	yes
ENSG00000114631.10	PODXL2	2.57821	3.25327	2.80074	2.37511	1.80094	2.13498	ENSG00000114631.10	PODXL2	chr3:127629180-127672809	MB231_CTRL	MB231_W2	OK	2.87741	2.10368	-0.451857	-1.53627	0.0084	0.0388323	yes
ENSG00000114686.8	MRPL3	43.6576	49.6108	52.93	36.8233	40.5867	41.1341	ENSG00000114686.8	MRPL3	chr3:131462211-131502983	MB231_CTRL	MB231_W2	OK	48.7328	39.5147	-0.302503	-1.54604	0.0071	0.0339979	yes
ENSG00000114735.9	HEMK1	3.18149	2.50731	3.91145	4.40108	4.63012	7.68718	ENSG00000114735.9	HEMK1	chr3:50558024-50596168	MB231_CTRL	MB231_W2	OK	3.20008	5.5728	0.800293	1.38251	0.0112	0.0486671	yes
ENSG00000114738.10	MAPKAPK3	19.543	25.9132	23.5897	12.2451	18.4016	18.3961	ENSG00000114738.10	MAPKAPK3	chr3:50606489-50649297	MB231_CTRL	MB231_W2	OK	23.0153	16.3476	-0.493513	-1.73677	0.0021	0.0126444	yes
ENSG00000114744.8	COMMD2	14.6748	15.3114	18.1842	22.8989	35.1606	29.9714	ENSG00000114744.8	COMMD2	chr3:149738469-149752499	MB231_CTRL	MB231_W2	OK	16.0568	29.3436	0.869863	2.32514	0.0001	0.000939965	yes
ENSG00000114767.6	RRP9	9.30877	9.98763	9.25231	5.68015	6.72409	9.23751	ENSG00000114767.6	RRP9	chr3:51933429-51941941	MB231_CTRL	MB231_W2	OK	9.51624	7.21392	-0.399608	-1.61892	0.00605	0.0299125	yes
ENSG00000114770.16	ABCC5	7.33859	8.98368	10.4979	12.6398	14.4124	15.4583	ENSG00000114770.16	ABCC5	chr3:183919933-184018015	MB231_CTRL	MB231_W2	OK	8.94005	14.1702	0.664503	1.73357	0.00225	0.0134005	yes
ENSG00000114784.3	EIF1B	22.3232	28.0283	26.4264	36.8578	48.7663	27.8653	ENSG00000114784.3	EIF1B	chr3:39808913-40312424	MB231_CTRL	MB231_W2	OK	25.5926	37.8298	0.563793	2.22025	0.0001	0.000939965	yes
ENSG00000114786.16	ABHD14A-ACY1	0.580771	0.557012	0.48975	3.85723	1.74189	4.00105	ENSG00000114786.16	ABHD14A-ACY1	chr3:51955313-51989202	MB231_CTRL	MB231_W2	OK	0.542511	3.20006	2.56037	0.811118	5e-05	0.000503098	yes
ENSG00000114790.12	ARHGEF26	4.72537	4.67203	4.94146	5.4562	5.79136	9.23252	ENSG00000114790.12	ARHGEF26	chr3:154024400-154257827	MB231_CTRL	MB231_W2	OK	4.77962	6.82669	0.514291	1.63836	0.0059	0.0293549	yes
ENSG00000114812.12	VIPR1	9.43687	9.35068	10.3024	30.1239	27.2681	30.1229	ENSG00000114812.12	VIPR1	chr3:42489298-42537573	MB231_CTRL	MB231_W2	OK	9.69665	29.1716	1.58901	4.38371	5e-05	0.000503098	yes
ENSG00000114857.17	NKTR	11.529	11.6339	13.1292	50.0888	52.3952	65.1569	ENSG00000114857.17	NKTR	chr3:42547968-42665854	MB231_CTRL	MB231_W2	OK	12.0974	55.8803	2.20765	3.84636	5e-05	0.000503098	yes
ENSG00000114859.15	CLCN2	3.4323	3.98631	3.60421	6.13101	8.2965	11.596	ENSG00000114859.15	CLCN2	chr3:184335925-184361651	MB231_CTRL	MB231_W2	OK	3.67427	8.67449	1.23932	1.25671	0.00045	0.00346901	yes
ENSG00000114867.20	EIF4G1	202.265	207.53	197.284	88.0913	120.763	111.395	ENSG00000114867.20	EIF4G1	chr3:184314494-184335358	MB231_CTRL	MB231_W2	OK	202.36	106.75	-0.922688	-2.36682	5e-05	0.000503098	yes
ENSG00000114982.17	KANSL3	21.1899	23.1773	20.391	30.1817	34.5623	31.2247	ENSG00000114982.17	KANSL3	chr2:96593169-96704887	MB231_CTRL	MB231_W2	OK	21.5861	31.9896	0.567499	1.41147	0.00825	0.0382838	yes
ENSG00000114988.11	LMAN2L	11.7738	11.4858	12.5404	7.54837	7.09466	8.89838	ENSG00000114988.11	LMAN2L	chr2:96705928-96740064	MB231_CTRL	MB231_W2	OK	11.9333	7.84714	-0.604758	-1.71117	0.0007	0.00502945	yes
ENSG00000114999.7	TTL	70.8066	73.9705	73.6315	50.5877	50.6018	53.2797	ENSG00000114999.7	TTL	chr2:112482153-112541739	MB231_CTRL	MB231_W2	OK	72.8028	51.4898	-0.499709	-2.06791	0.00055	0.0041207	yes
ENSG00000115008.5	IL1A	1.19073	1.71783	1.67569	4.75062	5.09248	3.74573	ENSG00000115008.5	IL1A	chr2:112773914-112784590	MB231_CTRL	MB231_W2	OK	1.52809	4.52961	1.56766	3.49345	5e-05	0.000503098	yes
ENSG00000115053.15	NCL	236.946	284.491	271.065	182.059	153.477	175.53	ENSG00000115053.15	NCL	chr2:231453530-231483641	MB231_CTRL	MB231_W2	OK	264.167	170.355	-0.632906	-1.89985	0.00075	0.00534003	yes
ENSG00000115084.12	SLC35F5	28.7138	30.6108	33.904	15.2613	18.341	21.1881	ENSG00000115084.12	SLC35F5	chr2:113705010-113756823	MB231_CTRL	MB231_W2	OK	31.0762	18.2635	-0.76685	-2.52694	5e-05	0.000503098	yes
ENSG00000115091.11	ACTR3	80.9368	77.6712	89.0875	52.9844	55.0794	57.6933	ENSG00000115091.11	ACTR3	chr2:113889959-113962596	MB231_CTRL	MB231_W2	OK	82.5651	55.2524	-0.579496	-2.19945	0.0007	0.00502945	yes
ENSG00000115107.19	STEAP3	28.8956	35.826	31.5881	9.18247	17.1342	17.1321	ENSG00000115107.19	STEAP3	chr2:119223830-119265652	MB231_CTRL	MB231_W2	OK	32.1032	14.4829	-1.14837	-3.91657	5e-05	0.000503098	yes
ENSG00000115128.6	SF3B6	63.0375	62.194	57.1318	62.5326	78.7654	84.6731	ENSG00000115128.6	SF3B6	chr2:24067583-24076443	MB231_CTRL	MB231_W2	OK	60.7877	75.3237	0.309323	1.8454	0.0013	0.00851582	yes
ENSG00000115159.15	GPD2	16.807	20.9584	19.202	11.4137	13.3009	14.7457	ENSG00000115159.15	GPD2	chr2:156435289-156613735	MB231_CTRL	MB231_W2	OK	18.9891	13.1534	-0.529732	-1.6812	0.0017	0.0106371	yes
ENSG00000115163.14	CENPA	27.0697	25.28	27.6437	41.0112	61.367	56.7543	ENSG00000115163.14	CENPA	chr2:26764283-26801067	MB231_CTRL	MB231_W2	OK	26.6645	53.0442	0.992277	3.66715	5e-05	0.000503098	yes
ENSG00000115216.13	NRBP1	127.449	142.473	147.842	68.2222	105.123	89.1126	ENSG00000115216.13	NRBP1	chr2:27427789-27442259	MB231_CTRL	MB231_W2	OK	139.255	87.4858	-0.670607	-2.16813	0.0005	0.00379645	yes
ENSG00000115233.11	PSMD14	93.2805	86.5543	94.1935	43.5292	71.2255	59.8419	ENSG00000115233.11	PSMD14	chr2:161096230-161411717	MB231_CTRL	MB231_W2	OK	91.3428	58.1989	-0.650299	-2.01207	0.0009	0.00624357	yes
ENSG00000115257.15	PCSK4	0.571599	0.179977	0.197492	0.969619	5.93123	1.70309	ENSG00000115257.15	PCSK4	chr19:1481427-1497927	MB231_CTRL	MB231_W2	OK	0.316356	2.86798	3.18041	0.670888	5e-05	0.000503098	yes
ENSG00000115282.19	TTC31	4.0558	3.82149	4.96822	10.535	11.8244	15.3947	ENSG00000115282.19	TTC31	chr2:74471957-74494886	MB231_CTRL	MB231_W2	OK	4.28184	12.5847	1.55537	2.611	5e-05	0.000503098	yes
ENSG00000115295.19	CLIP4	20.9155	22.8055	23.8147	28.4142	34.3106	40.5881	ENSG00000115295.19	CLIP4	chr2:29097704-29189643	MB231_CTRL	MB231_W2	OK	22.5119	34.4376	0.613297	2.42554	5e-05	0.000503098	yes
ENSG00000115306.15	SPTBN1	98.0459	106.89	108.126	62.2817	78.8357	69.7884	ENSG00000115306.15	SPTBN1	chr2:54456284-54680045	MB231_CTRL	MB231_W2	OK	104.354	70.3019	-0.56985	-3.07751	5e-05	0.000503098	yes
ENSG00000115307.16	AUP1	70.8653	71.163	67.2934	83.4569	106.936	102.789	ENSG00000115307.16	AUP1	chr2:74526644-74557554	MB231_CTRL	MB231_W2	OK	69.7739	97.7273	0.486074	2.16346	0.0002	0.00172918	yes
ENSG00000115310.17	RTN4	288.139	338.048	332.713	208.659	200.363	210.992	ENSG00000115310.17	RTN4	chr2:54972186-55112621	MB231_CTRL	MB231_W2	OK	319.633	206.671	-0.62908	-2.95983	5e-05	0.000503098	yes
ENSG00000115364.13	MRPL19	35.0359	37.9965	47.0465	21.8037	28.1546	23.0095	ENSG00000115364.13	MRPL19	chr2:75646782-75710989	MB231_CTRL	MB231_W2	OK	40.0263	24.3226	-0.718649	-1.76467	0.00185	0.0114022	yes
ENSG00000115392.11	FANCL	5.33305	4.68354	2.57925	11.3451	5.59663	8.74905	ENSG00000115392.11	FANCL	chr2:57907650-58241686	MB231_CTRL	MB231_W2	OK	4.19861	8.56359	1.0283	1.56805	0.00285	0.0162772	yes
ENSG00000115446.11	UNC50	12.6177	13.2241	15.7489	16.1321	22.9171	21.892	ENSG00000115446.11	UNC50	chr2:98608578-98618515	MB231_CTRL	MB231_W2	OK	13.8636	20.3137	0.551156	1.86412	0.00065	0.00473038	yes
ENSG00000115514.11	TXNDC9	39.1815	43.2728	50.6564	71.9186	76.9048	71.7699	ENSG00000115514.11	TXNDC9	chr2:98997260-99490035	MB231_CTRL	MB231_W2	OK	44.3702	73.5311	0.728762	1.535	0.01095	0.0478279	yes
ENSG00000115520.8	COQ10B	20.6659	22.0416	22.5214	28.6383	28.0388	27.8475	ENSG00000115520.8	COQ10B	chr2:197453422-197475308	MB231_CTRL	MB231_W2	OK	21.7429	28.1749	0.373862	1.81255	0.00165	0.0103809	yes
ENSG00000115524.15	SF3B1	76.3507	86.1494	90.5647	68.6668	64.0906	66.7638	ENSG00000115524.15	SF3B1	chr2:197389783-197435091	MB231_CTRL	MB231_W2	OK	84.3549	66.5071	-0.342964	-1.33779	0.01035	0.045719	yes
ENSG00000115539.13	PDCL3	16.8511	14.7405	16.0119	8.47344	9.90717	10.4843	ENSG00000115539.13	PDCL3	chr2:100562689-100576735	MB231_CTRL	MB231_W2	OK	15.8678	9.62164	-0.721751	-2.99969	5e-05	0.000503098	yes
ENSG00000115548.16	KDM3A	31.0657	39.9565	33.9436	62.2361	44.3922	61.3363	ENSG00000115548.16	KDM3A	chr2:86440646-86492716	MB231_CTRL	MB231_W2	OK	34.9886	55.9882	0.678238	1.61254	0.0047	0.0245361	yes
ENSG00000115561.15	CHMP3	55.184	64.2837	68.9039	41.3177	48.6382	48.1007	ENSG00000115561.15	CHMP3	chr2:86503430-86778041	MB231_CTRL	MB231_W2	OK	62.7905	46.0188	-0.448323	-2.10239	0.00025	0.00209262	yes
ENSG00000115594.11	IL1R1	5.54775	5.37506	6.06879	3.52716	3.19524	3.47798	ENSG00000115594.11	IL1R1	chr2:102064543-102182108	MB231_CTRL	MB231_W2	OK	5.66387	3.40013	-0.7362	-1.42652	0.00085	0.00593698	yes
ENSG00000115648.13	MLPH	17.9403	18.2571	14.9549	22.0114	31.4	30.9143	ENSG00000115648.13	MLPH	chr2:237485427-237555318	MB231_CTRL	MB231_W2	OK	17.0508	28.1086	0.721173	2.08756	0.0002	0.00172918	yes
ENSG00000115652.14	UXS1	51.5039	55.7855	67.0786	40.3198	40.2001	42.5237	ENSG00000115652.14	UXS1	chr2:106093302-106194339	MB231_CTRL	MB231_W2	OK	58.1226	41.0145	-0.502966	-1.81653	0.00205	0.0124065	yes
ENSG00000115657.12	ABCB6	4.84249	4.26376	5.1545	7.74077	20.1486	10.3407	ENSG00000115657.12	ABCB6	chr2:219209767-219229717	MB231_CTRL	MB231_W2	OK	4.75358	12.7434	1.42266	1.67078	0.00115	0.00769031	yes
ENSG00000115687.13	PASK	2.37967	2.09051	3.28898	5.1273	10.5079	12.3424	ENSG00000115687.13	PASK	chr2:241106098-241183652	MB231_CTRL	MB231_W2	OK	2.58639	9.32586	1.8503	1.7146	5e-05	0.000503098	yes
ENSG00000115694.14	STK25	27.4378	31.7013	30.0832	46.9939	55.1014	70.0663	ENSG00000115694.14	STK25	chr2:241356242-241509730	MB231_CTRL	MB231_W2	OK	29.7408	57.3872	0.948288	2.945	5e-05	0.000503098	yes
ENSG00000115758.12	ODC1	79.5532	84.63	78.5079	52.0295	66.3283	68.9842	ENSG00000115758.12	ODC1	chr2:10439967-10448504	MB231_CTRL	MB231_W2	OK	80.897	62.4473	-0.373446	-2.20766	0.0001	0.000939965	yes
ENSG00000115762.16	PLEKHB2	66.8008	70.5937	76.4095	39.2962	46.2762	39.5187	ENSG00000115762.16	PLEKHB2	chr2:131104846-131353709	MB231_CTRL	MB231_W2	OK	71.268	41.697	-0.77331	-4.61726	5e-05	0.000503098	yes
ENSG00000115808.11	STRN	9.88382	14.3017	15.0258	7.88753	8.32292	7.11462	ENSG00000115808.11	STRN	chr2:36843639-36966472	MB231_CTRL	MB231_W2	OK	13.0704	7.77502	-0.74939	-3.65748	5e-05	0.000503098	yes
ENSG00000115816.14	CEBPZ	19.6626	23.0331	25.978	16.7832	16.2362	16.8013	ENSG00000115816.14	CEBPZ	chr2:37167819-37324808	MB231_CTRL	MB231_W2	OK	22.8912	16.6069	-0.46301	-1.74277	0.00305	0.0171451	yes
ENSG00000115839.17	RAB3GAP1	13.0506	15.8181	17.5807	10.136	8.82534	8.64703	ENSG00000115839.17	RAB3GAP1	chr2:135052264-135531236	MB231_CTRL	MB231_W2	OK	15.4831	9.2028	-0.750549	-2.11589	0.0002	0.00172918	yes
ENSG00000115866.10	DARS	81.326	95.0822	100.245	61.439	68.2076	47.8667	ENSG00000115866.10	DARS	chr2:135906676-136022593	MB231_CTRL	MB231_W2	OK	92.2176	59.1711	-0.640149	-2.83934	5e-05	0.000503098	yes
ENSG00000115875.18	SRSF7	70.2922	74.144	72.2261	102.669	113.067	115.165	ENSG00000115875.18	SRSF7	chr2:38743598-38751494	MB231_CTRL	MB231_W2	OK	72.2208	110.3	0.61095	3.36102	5e-05	0.000503098	yes
ENSG00000115884.10	SDC1	46.3845	43.6577	41.9783	21.2786	27.8524	22.0397	ENSG00000115884.10	SDC1	chr2:20200796-20225433	MB231_CTRL	MB231_W2	OK	44.0068	23.7236	-0.891406	-3.80707	5e-05	0.000503098	yes
ENSG00000115935.17	WIPF1	24.6209	25.4906	32.8022	17.7576	19.3888	19.8991	ENSG00000115935.17	WIPF1	chr2:174547140-174787935	MB231_CTRL	MB231_W2	OK	27.6379	19.0151	-0.539497	-1.67238	0.002	0.0121525	yes
ENSG00000115993.12	TRAK2	10.9686	11.6754	12.4199	14.2149	16.4468	16.3043	ENSG00000115993.12	TRAK2	chr2:201377206-201480846	MB231_CTRL	MB231_W2	OK	11.688	15.6553	0.421628	1.65304	0.003	0.0169143	yes
ENSG00000116001.15	TIA1	10.043	15.8551	15.0755	52.1259	55.661	66.4325	ENSG00000116001.15	TIA1	chr2:70149879-70248660	MB231_CTRL	MB231_W2	OK	13.6579	58.0732	2.08814	4.82548	5e-05	0.000503098	yes
ENSG00000116005.11	PCYOX1	36.5859	35.5846	36.0989	17.4482	16.6579	17.0541	ENSG00000116005.11	PCYOX1	chr2:70257385-70281191	MB231_CTRL	MB231_W2	OK	36.0898	17.0534	-1.08153	-5.40897	5e-05	0.000503098	yes
ENSG00000116062.14	MSH6	51.8056	58.0361	62.5651	36.6603	38.8191	31.9262	ENSG00000116062.14	MSH6	chr2:47695529-47907810	MB231_CTRL	MB231_W2	OK	57.4689	35.8018	-0.682748	-2.49629	0.0006	0.00442867	yes
ENSG00000116095.10	PLEKHA3	4.94293	5.59244	6.38467	3.3429	3.93141	2.40057	ENSG00000116095.10	PLEKHA3	chr2:178480467-178516462	MB231_CTRL	MB231_W2	OK	5.64001	3.22496	-0.806417	-1.58146	0.003	0.0169143	yes
ENSG00000116096.5	SPR	24.3322	23.1774	20.772	11.1189	15.3986	10.5916	ENSG00000116096.5	SPR	chr2:72887359-72892158	MB231_CTRL	MB231_W2	OK	22.7605	12.3697	-0.879724	-3.65016	5e-05	0.000503098	yes
ENSG00000116133.11	DHCR24	37.1005	43.8279	36.843	18.4669	23.67	18.1734	ENSG00000116133.11	DHCR24	chr1:54849632-54888850	MB231_CTRL	MB231_W2	OK	39.2571	20.1034	-0.965513	-5.9399	5e-05	0.000503098	yes
ENSG00000116138.12	DNAJC16	10.9201	10.2769	9.75288	5.89233	7.13242	7.78826	ENSG00000116138.12	DNAJC16	chr1:15526812-15603626	MB231_CTRL	MB231_W2	OK	10.3166	6.93767	-0.572448	-1.54372	0.0032	0.0178059	yes
ENSG00000116151.13	MORN1	5.79024	5.34488	5.34943	8.74128	10.2671	10.1315	ENSG00000116151.13	MORN1	chr1:2321252-2391707	MB231_CTRL	MB231_W2	OK	5.49485	9.71328	0.821877	1.71773	0.0006	0.00442867	yes
ENSG00000116199.11	FAM20B	20.7586	22.3748	24.4256	15.1312	15.7294	15.5748	ENSG00000116199.11	FAM20B	chr1:179025803-179076562	MB231_CTRL	MB231_W2	OK	22.5197	15.4785	-0.540925	-3.40442	5e-05	0.000503098	yes
ENSG00000116209.11	TMEM59	114.409	125.993	122.753	130.152	184.538	170.459	ENSG00000116209.11	TMEM59	chr1:54026680-54053504	MB231_CTRL	MB231_W2	OK	121.052	161.717	0.417845	2.03186	0.00045	0.00346901	yes
ENSG00000116212.14	LRRC42	27.0828	29.1452	33.7455	19.1426	24.3954	22.5603	ENSG00000116212.14	LRRC42	chr1:53946076-53968168	MB231_CTRL	MB231_W2	OK	29.9912	22.0328	-0.444886	-2.0549	0.00035	0.00280437	yes
ENSG00000116221.15	MRPL37	58.4828	61.8595	49.8448	28.9226	36.5127	37.5194	ENSG00000116221.15	MRPL37	chr1:54132685-54413479	MB231_CTRL	MB231_W2	OK	56.7291	34.3182	-0.725113	-3.32153	5e-05	0.000503098	yes
ENSG00000116237.15	ICMT	86.4298	88.6621	86.6239	55.038	70.7278	59.9766	ENSG00000116237.15	ICMT	chr1:6181268-6235972	MB231_CTRL	MB231_W2	OK	87.2386	61.9141	-0.494698	-1.72225	0.0029	0.0164807	yes
ENSG00000116260.16	QSOX1	89.0625	110.042	91.0056	61.1804	58.0467	60.432	ENSG00000116260.16	QSOX1	chr1:180154833-180204030	MB231_CTRL	MB231_W2	OK	96.7033	59.8864	-0.691338	-2.7755	5e-05	0.000503098	yes
ENSG00000116266.10	STXBP3	11.4288	12.7197	13.2655	16.9901	18.7403	27.1664	ENSG00000116266.10	STXBP3	chr1:108746673-108809526	MB231_CTRL	MB231_W2	OK	12.4713	20.9656	0.749409	1.80944	0.00065	0.00473038	yes
ENSG00000116288.12	PARK7	71.0612	79.2731	75.1418	59.9389	52.7361	61.4167	ENSG00000116288.12	PARK7	chr1:7954290-7985505	MB231_CTRL	MB231_W2	OK	75.1587	58.0306	-0.373126	-2.17031	0.0002	0.00172918	yes
ENSG00000116406.18	EDEM3	17.3249	18.6042	19.7637	12.5962	11.6885	12.7601	ENSG00000116406.18	EDEM3	chr1:184690230-184754913	MB231_CTRL	MB231_W2	OK	18.5642	12.3483	-0.588214	-2.87845	5e-05	0.000503098	yes
ENSG00000116459.10	ATP5F1	111.531	122.483	117.377	129.865	171.137	159.096	ENSG00000116459.10	ATP5F1	chr1:111438637-111462773	MB231_CTRL	MB231_W2	OK	117.131	153.366	0.388862	1.62557	0.0046	0.0241105	yes
ENSG00000116514.16	RNF19B	8.48681	8.6011	10.7655	5.15496	7.51542	5.8105	ENSG00000116514.16	RNF19B	chr1:32936444-32964685	MB231_CTRL	MB231_W2	OK	9.28449	6.16029	-0.591823	-2.61857	5e-05	0.000503098	yes
ENSG00000116560.10	SFPQ	131.193	144.237	153.258	175.839	181.987	182.153	ENSG00000116560.10	SFPQ	chr1:35176377-35193148	MB231_CTRL	MB231_W2	OK	142.896	179.993	0.332977	1.31699	0.01	0.0445317	yes
ENSG00000116574.5	RHOU	1.98431	2.40512	2.83732	1.13637	1.20994	1.37847	ENSG00000116574.5	RHOU	chr1:228735076-228746669	MB231_CTRL	MB231_W2	OK	2.40891	1.24159	-0.956193	-2.28385	0.0005	0.00379645	yes
ENSG00000116580.18	GON4L	7.76369	6.62942	10.3853	14.4245	17.4119	17.4906	ENSG00000116580.18	GON4L	chr1:155745828-155859400	MB231_CTRL	MB231_W2	OK	8.25946	16.4423	0.993295	2.36754	5e-05	0.000503098	yes
ENSG00000116649.9	SRM	154.536	177.543	154.5	98.9037	96.4611	115.836	ENSG00000116649.9	SRM	chr1:11054583-11060024	MB231_CTRL	MB231_W2	OK	162.193	103.734	-0.64483	-3.00027	5e-05	0.000503098	yes
ENSG00000116667.12	C1orf21	23.9273	23.6687	26.2391	16.2286	14.5108	16.9789	ENSG00000116667.12	C1orf21	chr1:184387057-184629020	MB231_CTRL	MB231_W2	OK	24.6117	15.9061	-0.629767	-1.54069	0.00635	0.031079	yes
ENSG00000116679.15	IVNS1ABP	35.7802	37.1978	47.8378	55.6883	51.8657	62.8807	ENSG00000116679.15	IVNS1ABP	chr1:185296387-185317329	MB231_CTRL	MB231_W2	OK	40.2719	56.8116	0.49641	1.54743	0.0064	0.031255	yes
ENSG00000116685.15	KIAA2013	37.5779	38.0213	36.1595	18.9399	20.3463	25.9638	ENSG00000116685.15	KIAA2013	chr1:11919590-11926428	MB231_CTRL	MB231_W2	OK	37.2529	21.75	-0.776335	-4.30161	5e-05	0.000503098	yes
ENSG00000116688.16	MFN2	37.7269	35.3327	38.2139	18.9095	31.2573	20.4127	ENSG00000116688.16	MFN2	chr1:11980180-12013514	MB231_CTRL	MB231_W2	OK	37.0912	23.5265	-0.65679	-1.59742	0.0063	0.0308862	yes
ENSG00000116704.7	SLC35D1	7.36973	7.90819	8.05563	4.90361	5.2513	5.64146	ENSG00000116704.7	SLC35D1	chr1:66999331-67054099	MB231_CTRL	MB231_W2	OK	7.77785	5.26546	-0.562812	-2.58019	5e-05	0.000503098	yes
ENSG00000116741.7	RGS2	0.839579	1.3675	1.01891	2.43407	4.024	2.40964	ENSG00000116741.7	RGS2	chr1:192809038-192812283	MB231_CTRL	MB231_W2	OK	1.07533	2.9559	1.45882	1.1427	0.00775	0.0364418	yes
ENSG00000116747.12	TROVE2	42.3156	46.0321	56.4078	28.1404	31.3192	32.4221	ENSG00000116747.12	TROVE2	chr1:193012249-193091777	MB231_CTRL	MB231_W2	OK	48.2518	30.6272	-0.655769	-1.64667	0.00475	0.0247357	yes
ENSG00000116754.13	SRSF11	37.9145	43.2955	46.2684	82.554	111.989	99.3358	ENSG00000116754.13	SRSF11	chr1:70205681-70253052	MB231_CTRL	MB231_W2	OK	42.4928	97.9595	1.20497	2.97685	5e-05	0.000503098	yes
ENSG00000116786.11	PLEKHM2	17.0758	17.2852	18.8827	10.7592	14.6633	11.3537	ENSG00000116786.11	PLEKHM2	chr1:15684331-15749896	MB231_CTRL	MB231_W2	OK	17.7479	12.2588	-0.533836	-2.02096	0.00125	0.00825545	yes
ENSG00000116809.11	ZBTB17	8.89025	8.21505	9.65462	10.2257	15.6086	20.9246	ENSG00000116809.11	ZBTB17	chr1:15941868-15976132	MB231_CTRL	MB231_W2	OK	8.91997	15.5863	0.805167	1.68846	0.00145	0.00933362	yes
ENSG00000116815.15	CD58	30.5895	38.5867	26.7405	56.9048	68.7116	68.2347	ENSG00000116815.15	CD58	chr1:116514534-116571039	MB231_CTRL	MB231_W2	OK	31.9723	64.617	1.01509	4.20794	5e-05	0.000503098	yes
ENSG00000116863.10	ADPRHL2	27.3821	29.4009	30.7939	15.0213	16.3828	19.3566	ENSG00000116863.10	ADPRHL2	chr1:36088874-36093932	MB231_CTRL	MB231_W2	OK	29.1923	16.9202	-0.786838	-3.82517	5e-05	0.000503098	yes
ENSG00000116871.15	MAP7D1	110.446	106.341	92.2004	55.8317	77.4676	76.4824	ENSG00000116871.15	MAP7D1	chr1:36136569-36180849	MB231_CTRL	MB231_W2	OK	102.996	69.9273	-0.558658	-1.62906	0.0046	0.0241105	yes
ENSG00000116883.8	RP11-268J15.5	1.14063	1.55204	1.27932	6.61865	3.81488	6.34691	ENSG00000116883.8	RP11-268J15.5	chr1:36306386-36329221	MB231_CTRL	MB231_W2	OK	1.32399	5.59348	2.07885	3.24155	5e-05	0.000503098	yes
ENSG00000116885.18	OSCP1	1.57904	1.99041	1.39221	2.51989	3.04386	5.72152	ENSG00000116885.18	OSCP1	chr1:36415826-36450451	MB231_CTRL	MB231_W2	OK	1.65389	3.76175	1.18555	0.824184	0.00505	0.0259515	yes
ENSG00000116922.14	C1orf109	17.7378	15.2494	18.4114	19.7376	27.7138	23.232	ENSG00000116922.14	C1orf109	chr1:37681569-37692249	MB231_CTRL	MB231_W2	OK	17.1329	23.5611	0.459641	1.5787	0.0041	0.0218807	yes
ENSG00000116954.7	RRAGC	29.8885	30.9109	32.3915	18.3102	16.1983	23.1721	ENSG00000116954.7	RRAGC	chr1:38838197-38941799	MB231_CTRL	MB231_W2	OK	31.0636	19.2269	-0.6921	-2.07026	0.0017	0.0106371	yes
ENSG00000116977.18	LGALS8	20.1283	23.813	27.9974	45.4268	43.7334	35.9238	ENSG00000116977.18	LGALS8	chr1:236517999-236604504	MB231_CTRL	MB231_W2	OK	23.9796	41.6947	0.798058	1.92433	0.001	0.00683457	yes
ENSG00000116984.12	MTR	9.7512	8.99769	10.1672	6.41891	7.85348	6.29946	ENSG00000116984.12	MTR	chr1:236795280-236903981	MB231_CTRL	MB231_W2	OK	9.63871	6.85729	-0.491202	-2.05286	0.0006	0.00442867	yes
ENSG00000117000.8	RLF	10.4885	12.2501	12.1187	9.70716	8.52302	9.71187	ENSG00000117000.8	RLF	chr1:40161372-40240921	MB231_CTRL	MB231_W2	OK	11.6191	9.31402	-0.319026	-1.9761	0.0006	0.00442867	yes
ENSG00000117152.13	RGS4	4.06185	5.11712	5.51191	2.89609	2.58321	2.60393	ENSG00000117152.13	RGS4	chr1:163068774-163076802	MB231_CTRL	MB231_W2	OK	4.89696	2.69441	-0.861917	-1.53346	0.00055	0.0041207	yes
ENSG00000117174.10	ZNHIT6	14.9916	16.4186	20.3126	10.3061	10.6581	12.0677	ENSG00000117174.10	ZNHIT6	chr1:85649422-85708433	MB231_CTRL	MB231_W2	OK	17.2409	11.0106	-0.646941	-3.84004	5e-05	0.000503098	yes
ENSG00000117222.13	RBBP5	11.0621	11.8591	14.382	6.79868	8.00982	7.63339	ENSG00000117222.13	RBBP5	chr1:205086141-205122015	MB231_CTRL	MB231_W2	OK	12.4344	7.48063	-0.733108	-3.0468	5e-05	0.000503098	yes
ENSG00000117228.9	GBP1	12.9278	16.6587	16.3862	8.06733	10.0132	7.8924	ENSG00000117228.9	GBP1	chr1:89052318-89065360	MB231_CTRL	MB231_W2	OK	15.3242	8.65764	-0.823769	-3.10299	5e-05	0.000503098	yes
ENSG00000117298.14	ECE1	70.033	78.5028	80.082	28.3327	48.1138	34.9124	ENSG00000117298.14	ECE1	chr1:21217246-21345504	MB231_CTRL	MB231_W2	OK	76.2059	37.1197	-1.03772	-3.96352	5e-05	0.000503098	yes
ENSG00000117308.14	GALE	42.4137	47.6827	41.1413	26.9756	36.9264	32.8238	ENSG00000117308.14	GALE	chr1:23795598-23800804	MB231_CTRL	MB231_W2	OK	43.7459	32.2419	-0.440212	-2.02375	0.00045	0.00346901	yes
ENSG00000117318.8	ID3	3.29905	4.51027	3.45463	8.525	9.33062	10.879	ENSG00000117318.8	ID3	chr1:23557917-23559794	MB231_CTRL	MB231_W2	OK	3.75465	9.5782	1.35108	2.49294	5e-05	0.000503098	yes
ENSG00000117360.12	PRPF3	10.7004	11.3006	11.3158	22.7962	26.5782	37.2922	ENSG00000117360.12	PRPF3	chr1:150321475-150353195	MB231_CTRL	MB231_W2	OK	11.1056	28.8889	1.37923	4.73345	5e-05	0.000503098	yes
ENSG00000117394.19	SLC2A1	217.221	216.453	203.336	134.59	161.808	153.02	ENSG00000117394.19	SLC2A1	chr1:42925374-42983358	MB231_CTRL	MB231_W2	OK	212.337	149.806	-0.503258	-2.28452	5e-05	0.000503098	yes
ENSG00000117395.11	EBNA1BP2	122.694	127.719	124.43	75.2362	104.453	93.4847	ENSG00000117395.11	EBNA1BP2	chr1:43164174-43274002	MB231_CTRL	MB231_W2	OK	124.948	91.058	-0.456464	-1.97238	0.0005	0.00379645	yes
ENSG00000117410.13	ATP6V0B	35.8962	45.6832	39.0147	56.1587	66.279	97.4505	ENSG00000117410.13	ATP6V0B	chr1:43974486-43978295	MB231_CTRL	MB231_W2	OK	40.198	73.2961	0.866612	3.86516	5e-05	0.000503098	yes
ENSG00000117448.13	AKR1A1	17.1413	14.4599	18.3423	24.2546	25.5069	26.6279	ENSG00000117448.13	AKR1A1	chr1:45550542-45570049	MB231_CTRL	MB231_W2	OK	16.6478	25.4631	0.613075	2.08831	0.0001	0.000939965	yes
ENSG00000117450.13	PRDX1	387.883	420.304	423.995	250.943	242.016	249.097	ENSG00000117450.13	PRDX1	chr1:45493865-45523047	MB231_CTRL	MB231_W2	OK	410.727	247.352	-0.731614	-4.30373	5e-05	0.000503098	yes
ENSG00000117475.13	BLZF1	9.91232	12.9025	12.3484	16.9304	18.9074	21.3291	ENSG00000117475.13	BLZF1	chr1:169367969-169460669	MB231_CTRL	MB231_W2	OK	11.7211	19.0557	0.701117	2.96785	5e-05	0.000503098	yes
ENSG00000117500.12	TMED5	95.511	109.199	125.062	88.9349	71.2524	77.4711	ENSG00000117500.12	TMED5	chr1:93149741-93369498	MB231_CTRL	MB231_W2	OK	109.924	79.2195	-0.472577	-1.59065	0.0057	0.0285551	yes
ENSG00000117523.15	PRRC2C	50.3269	48.9379	58.3664	34.6122	28.046	30.8384	ENSG00000117523.15	PRRC2C	chr1:171485550-171593511	MB231_CTRL	MB231_W2	OK	52.5437	31.1655	-0.753568	-1.36918	0.00105	0.00712483	yes
ENSG00000117525.13	F3	279.904	294.168	295.372	227.369	233.111	245.929	ENSG00000117525.13	F3	chr1:94529224-94541800	MB231_CTRL	MB231_W2	OK	289.815	235.47	-0.299591	-1.77864	0.00245	0.0143789	yes
ENSG00000117569.18	PTBP2	7.71254	6.31861	5.53598	15.2429	16.7016	13.5233	ENSG00000117569.18	PTBP2	chr1:96721664-96823738	MB231_CTRL	MB231_W2	OK	6.52238	15.1559	1.21641	2.68076	5e-05	0.000503098	yes
ENSG00000117602.11	RCAN3	11.9914	15.1353	13.7176	7.58431	9.61214	9.78815	ENSG00000117602.11	RCAN3	chr1:24502350-24556024	MB231_CTRL	MB231_W2	OK	13.6148	8.99487	-0.597999	-2.41017	5e-05	0.000503098	yes
ENSG00000117616.17	RSRP1	10.125	14.4368	14.3841	37.6121	57.5662	61.7183	ENSG00000117616.17	RSRP1	chr1:25242236-25430192	MB231_CTRL	MB231_W2	OK	12.982	52.2989	2.01027	4.17119	5e-05	0.000503098	yes
ENSG00000117676.13	RPS6KA1	15.6843	16.7221	10.9351	5.54117	6.44656	9.37197	ENSG00000117676.13	RPS6KA1	chr1:26529760-26575030	MB231_CTRL	MB231_W2	OK	14.4472	7.1199	-1.02086	-1.62536	0.0003	0.00245627	yes
ENSG00000117682.16	DHDDS	14.9426	19.5542	18.7161	23.423	23.4904	29.9486	ENSG00000117682.16	DHDDS	chr1:26432281-26471294	MB231_CTRL	MB231_W2	OK	17.7376	25.6207	0.530495	1.50479	0.00485	0.0251526	yes
ENSG00000117697.14	NSL1	10.3318	11.0135	11.4317	16.2366	14.9781	17.6721	ENSG00000117697.14	NSL1	chr1:212726152-212791782	MB231_CTRL	MB231_W2	OK	10.9257	16.2956	0.576762	1.92949	0.0004	0.00314441	yes
ENSG00000117748.9	RPA2	39.0538	43.466	41.7229	30.6501	32.9589	32.0264	ENSG00000117748.9	RPA2	chr1:27891523-27914746	MB231_CTRL	MB231_W2	OK	41.4142	31.8784	-0.377545	-2.02032	0.0003	0.00245627	yes
ENSG00000117868.15	ESYT2	51.463	55.9782	55.7817	43.852	43.2561	39.5516	ENSG00000117868.15	ESYT2	chr7:158730994-158830253	MB231_CTRL	MB231_W2	OK	54.4077	42.2199	-0.365886	-2.06224	0.00015	0.00134259	yes
ENSG00000117899.10	MESDC2	15.3313	14.8611	16.3905	10.7361	11.6401	11.3965	ENSG00000117899.10	MESDC2	chr15:80779342-80989878	MB231_CTRL	MB231_W2	OK	15.5276	11.2575	-0.463945	-1.48497	0.00425	0.0225604	yes
ENSG00000117984.13	CTSD	679.386	701.528	683.097	321.542	378.239	358.157	ENSG00000117984.13	CTSD	chr11:1732409-1764573	MB231_CTRL	MB231_W2	OK	688.004	352.646	-0.964196	-5.11069	5e-05	0.000503098	yes
ENSG00000118181.10	RPS25	399.394	403.814	362.537	544.55	646.067	686.44	ENSG00000118181.10	RPS25	chr11:118998141-119030906	MB231_CTRL	MB231_W2	OK	388.582	625.686	0.68722	3.7243	5e-05	0.000503098	yes
ENSG00000118418.14	HMGN3	13.9088	16.9118	15.5355	27.7147	32.0458	33.0244	ENSG00000118418.14	HMGN3	chr6:79201244-79236797	MB231_CTRL	MB231_W2	OK	15.452	30.9283	1.00113	4.69535	5e-05	0.000503098	yes
ENSG00000118482.11	PHF3	30.9287	33.2364	37.0256	26.4895	21.67	25.4587	ENSG00000118482.11	PHF3	chr6:63635819-65707225	MB231_CTRL	MB231_W2	OK	33.7302	24.5394	-0.458943	-2.01103	0.0001	0.000939965	yes
ENSG00000118515.11	SGK1	9.94477	9.4422	8.24884	13.4189	14.6466	12.5079	ENSG00000118515.11	SGK1	chr6:134169245-134318112	MB231_CTRL	MB231_W2	OK	9.21194	13.5245	0.553995	1.12314	0.0036	0.0196502	yes
ENSG00000118518.15	RNF146	10.6046	8.14517	10.7767	4.09694	5.83605	5.81704	ENSG00000118518.15	RNF146	chr6:127266609-127288567	MB231_CTRL	MB231_W2	OK	9.84215	5.25001	-0.906652	-1.81746	5e-05	0.000503098	yes
ENSG00000118620.12	ZNF430	5.752	4.39559	3.91839	6.41428	7.39047	9.84594	ENSG00000118620.12	ZNF430	chr19:21020619-21060050	MB231_CTRL	MB231_W2	OK	4.68866	7.88357	0.749673	1.33058	0.006	0.0297391	yes
ENSG00000118680.12	MYL12B	337.153	362.673	338.792	426.121	547.282	504.091	ENSG00000118680.12	MYL12B	chr18:3261908-3278284	MB231_CTRL	MB231_W2	OK	346.206	492.498	0.508488	3.1931	5e-05	0.000503098	yes
ENSG00000118689.14	FOXO3	8.0803	8.53604	8.61658	4.24752	4.06526	4.93595	ENSG00000118689.14	FOXO3	chr6:108559834-108684774	MB231_CTRL	MB231_W2	OK	8.41098	4.41624	-0.929454	-4.60874	5e-05	0.000503098	yes
ENSG00000118705.16	RPN2	84.0636	91.8723	87.8344	57.4267	56.2101	60.7998	ENSG00000118705.16	RPN2	chr20:37101225-37241623	MB231_CTRL	MB231_W2	OK	87.9234	58.1455	-0.596579	-2.94985	5e-05	0.000503098	yes
ENSG00000118804.8	STBD1	5.19313	7.04121	5.88574	4.455	3.24566	3.27515	ENSG00000118804.8	STBD1	chr4:76214039-76311599	MB231_CTRL	MB231_W2	OK	6.04003	3.6586	-0.723262	-1.82884	0.00325	0.018039	yes
ENSG00000118898.15	PPL	5.32713	6.16295	6.40779	3.58046	4.66861	5.4007	ENSG00000118898.15	PPL	chr16:4882506-5097808	MB231_CTRL	MB231_W2	OK	5.96595	4.54992	-0.39091	-1.43416	0.0043	0.0227428	yes
ENSG00000119013.8	NDUFB3	27.8174	31.0478	26.5902	47.4617	53.7655	37.2645	ENSG00000119013.8	NDUFB3	chr2:200908972-201085750	MB231_CTRL	MB231_W2	OK	28.4851	46.1639	0.696556	1.61415	0.00605	0.0299125	yes
ENSG00000119203.13	CPSF3	23.0249	25.8322	26.0093	14.1597	16.9585	17.5007	ENSG00000119203.13	CPSF3	chr2:9423567-9473101	MB231_CTRL	MB231_W2	OK	24.9555	16.2063	-0.622798	-2.78914	5e-05	0.000503098	yes
ENSG00000119227.7	PIGZ	0.519189	0.482491	1.06352	1.08554	3.13314	2.82375	ENSG00000119227.7	PIGZ	chr3:196946342-196969060	MB231_CTRL	MB231_W2	OK	0.688398	2.34747	1.76979	1.23888	0.006	0.0297391	yes
ENSG00000119242.8	CCDC92	23.8029	26.035	26.0507	14.2348	14.8169	15.4468	ENSG00000119242.8	CCDC92	chr12:123762187-124316024	MB231_CTRL	MB231_W2	OK	25.2962	14.8329	-0.770123	-1.38606	0.0107	0.0469636	yes
ENSG00000119318.12	RAD23B	89.3688	93.0142	91.1157	58.8819	66.2566	62.476	ENSG00000119318.12	RAD23B	chr9:107283136-107332194	MB231_CTRL	MB231_W2	OK	91.1662	62.5381	-0.543763	-2.78058	5e-05	0.000503098	yes
ENSG00000119321.8	FKBP15	10.651	9.86884	7.89047	17.231	18.5402	18.5386	ENSG00000119321.8	FKBP15	chr9:113150941-113221361	MB231_CTRL	MB231_W2	OK	9.4701	18.1032	0.934797	1.84179	0.0034	0.0187451	yes
ENSG00000119335.16	SET	119.397	140.799	148.639	89.7872	94.0209	101.089	ENSG00000119335.16	SET	chr9:128683423-128696400	MB231_CTRL	MB231_W2	OK	136.279	94.9656	-0.521083	-1.56082	0.00655	0.0317988	yes
ENSG00000119383.19	PTPA	47.0694	58.4674	53.2906	22.0199	31.0965	28.7328	ENSG00000119383.19	PTPA	chr9:129094809-129148946	MB231_CTRL	MB231_W2	OK	52.9425	27.283	-0.956421	-3.60875	5e-05	0.000503098	yes
ENSG00000119392.14	GLE1	16.1198	18.4153	17.4945	8.03021	10.9214	8.49186	ENSG00000119392.14	GLE1	chr9:128504699-128552410	MB231_CTRL	MB231_W2	OK	17.3432	9.14781	-0.92287	-5.28376	5e-05	0.000503098	yes
ENSG00000119396.10	RAB14	59.4026	69.4538	68.2137	44.4761	36.68	32.0848	ENSG00000119396.10	RAB14	chr9:121178136-121332843	MB231_CTRL	MB231_W2	OK	65.69	37.747	-0.799314	-3.04061	5e-05	0.000503098	yes
ENSG00000119408.16	NEK6	49.8224	51.6773	52.6612	32.437	43.7226	37.3944	ENSG00000119408.16	NEK6	chr9:124257605-124353307	MB231_CTRL	MB231_W2	OK	51.387	37.8513	-0.441059	-2.52344	5e-05	0.000503098	yes
ENSG00000119414.11	PPP6C	50.5217	51.7033	53.4372	41.3269	40.2625	33.3651	ENSG00000119414.11	PPP6C	chr9:125146572-125189939	MB231_CTRL	MB231_W2	OK	51.8874	38.3182	-0.437354	-2.37813	0.0001	0.000939965	yes
ENSG00000119421.6	NDUFA8	59.4232	66.3532	66.4148	30.3522	48.1251	40.1704	ENSG00000119421.6	NDUFA8	chr9:122144057-122159819	MB231_CTRL	MB231_W2	OK	64.0637	39.5492	-0.695858	-3.76437	5e-05	0.000503098	yes
ENSG00000119471.14	HSDL2	21.4967	25.4881	25.4799	17.3892	15.6892	16.1275	ENSG00000119471.14	HSDL2	chr9:112379936-112669397	MB231_CTRL	MB231_W2	OK	24.1549	16.402	-0.558445	-2.66066	5e-05	0.000503098	yes
ENSG00000119487.16	MAPKAP1	57.5049	59.5699	67.4874	40.9258	41.2311	52.257	ENSG00000119487.16	MAPKAP1	chr9:125437392-125707234	MB231_CTRL	MB231_W2	OK	61.5207	44.8046	-0.457425	-2.03358	0.0002	0.00172918	yes
ENSG00000119522.16	DENND1A	16.814	16.239	15.3384	8.06013	10.207	12.5269	ENSG00000119522.16	DENND1A	chr9:123356169-123930152	MB231_CTRL	MB231_W2	OK	16.1305	10.2647	-0.652102	-1.38898	0.00645	0.0314181	yes
ENSG00000119523.9	ALG2	28.089	33.3109	30.1173	23.7839	23.2712	25.5651	ENSG00000119523.9	ALG2	chr9:99216425-99221956	MB231_CTRL	MB231_W2	OK	30.5058	24.2068	-0.333672	-1.73585	0.00245	0.0143789	yes
ENSG00000119541.9	VPS4B	21.2307	20.0734	20.2246	12.1687	12.8352	15.179	ENSG00000119541.9	VPS4B	chr18:63389189-63422483	MB231_CTRL	MB231_W2	OK	20.5096	13.3943	-0.614676	-2.44252	5e-05	0.000503098	yes
ENSG00000119559.15	C19orf25	25.4331	21.3207	21.8129	25.3213	33.0037	37.8273	ENSG00000119559.15	C19orf25	chr19:1446301-1479556	MB231_CTRL	MB231_W2	OK	22.8555	32.0508	0.487816	1.48977	0.0082	0.0381313	yes
ENSG00000119599.16	DCAF4	7.70833	6.37675	7.00518	18.8319	13.175	16.672	ENSG00000119599.16	DCAF4	chr14:72926331-72959703	MB231_CTRL	MB231_W2	OK	7.03009	16.2263	1.20672	3.10747	5e-05	0.000503098	yes
ENSG00000119632.3	IFI27L2	55.8114	47.6698	44.1562	62.8628	62.6454	62.8901	ENSG00000119632.3	IFI27L2	chr14:94127778-94130253	MB231_CTRL	MB231_W2	OK	49.2125	62.7994	0.351729	1.42717	0.01135	0.0491271	yes
ENSG00000119661.14	DNAL1	2.98419	4.86235	3.43103	6.63075	6.0733	6.54957	ENSG00000119661.14	DNAL1	chr14:73644874-73703732	MB231_CTRL	MB231_W2	OK	3.75919	6.41788	0.771675	1.15155	0.00945	0.0426495	yes
ENSG00000119669.4	IRF2BPL	17.1948	17.3726	16.665	10.6084	15.4419	14.1657	ENSG00000119669.4	IRF2BPL	chr14:77024542-77031572	MB231_CTRL	MB231_W2	OK	17.0775	13.4053	-0.349287	-1.88201	0.00165	0.0103809	yes
ENSG00000119688.20	ABCD4	26.4235	32.5525	25.066	37.4722	47.2376	49.061	ENSG00000119688.20	ABCD4	chr14:74285422-74303056	MB231_CTRL	MB231_W2	OK	28.014	44.5903	0.670582	2.07847	5e-05	0.000503098	yes
ENSG00000119698.11	PPP4R4	0.792146	1.55473	1.00379	4.1535	3.33323	5.67307	ENSG00000119698.11	PPP4R4	chr14:94146127-94279735	MB231_CTRL	MB231_W2	OK	1.11689	4.3866	1.97362	1.61869	0.00065	0.00473038	yes
ENSG00000119725.17	ZNF410	14.2138	18.1855	15.8822	20.6031	31.2681	32.0999	ENSG00000119725.17	ZNF410	chr14:73851843-74084493	MB231_CTRL	MB231_W2	OK	16.0938	27.9904	0.798424	1.83931	0.0008	0.00564084	yes
ENSG00000119760.15	SUPT7L	11.9413	12.6362	13.435	24.0825	22.3382	24.8889	ENSG00000119760.15	SUPT7L	chr2:27582968-27694976	MB231_CTRL	MB231_W2	OK	12.6708	23.7699	0.907624	2.64677	5e-05	0.000503098	yes
ENSG00000119777.18	TMEM214	20.9161	27.2119	19.7433	34.7172	40.8701	34.2006	ENSG00000119777.18	TMEM214	chr2:27032909-27041695	MB231_CTRL	MB231_W2	OK	22.6237	36.5959	0.693846	2.32021	5e-05	0.000503098	yes
ENSG00000119787.13	ATL2	34.7351	34.4564	36.183	40.5133	47.3978	51.3009	ENSG00000119787.13	ATL2	chr2:38294879-38377285	MB231_CTRL	MB231_W2	OK	35.1248	46.404	0.401757	1.55273	0.0049	0.0253321	yes
ENSG00000119888.10	EPCAM	8.93375	10.0548	11.5026	6.11153	8.05641	5.10782	ENSG00000119888.10	EPCAM	chr2:47345157-47387601	MB231_CTRL	MB231_W2	OK	10.1637	6.42526	-0.661603	-1.95172	0.00025	0.00209262	yes
ENSG00000119899.12	SLC17A5	22.9838	22.2921	26.0538	13.6219	13.6257	14.316	ENSG00000119899.12	SLC17A5	chr6:73593378-73654155	MB231_CTRL	MB231_W2	OK	23.7766	13.8546	-0.779181	-3.88531	5e-05	0.000503098	yes
ENSG00000119906.11	SLF2	16.8958	18.1753	17.9729	41.6415	41.5573	36.2678	ENSG00000119906.11	SLF2	chr10:100911102-100965136	MB231_CTRL	MB231_W2	OK	17.6813	39.8222	1.17135	2.89568	5e-05	0.000503098	yes
ENSG00000119912.15	IDE	20.0217	23.4014	23.3645	13.0116	14.2645	13.2221	ENSG00000119912.15	IDE	chr10:92451683-92574076	MB231_CTRL	MB231_W2	OK	22.2625	13.4994	-0.721725	-1.9113	0.00125	0.00825545	yes
ENSG00000119917.13	IFIT3	50.0609	49.9622	56.0872	32.0173	36.8397	33.0326	ENSG00000119917.13	IFIT3	chr10:89213568-89414557	MB231_CTRL	MB231_W2	OK	52.0368	33.9632	-0.61556	-2.54395	5e-05	0.000503098	yes
ENSG00000119969.14	HELLS	33.0083	39.0589	36.9622	54.6978	64.4963	55.0326	ENSG00000119969.14	HELLS	chr10:94402503-94613905	MB231_CTRL	MB231_W2	OK	36.3431	58.0756	0.676249	1.80818	0.0013	0.00851582	yes
ENSG00000120008.15	WDR11	21.5108	21.9542	28.9799	49.215	44.8146	35.0917	ENSG00000120008.15	WDR11	chr10:120761811-120909524	MB231_CTRL	MB231_W2	OK	24.1483	43.0404	0.833768	2.09838	0.0001	0.000939965	yes
ENSG00000120053.10	GOT1	24.1182	26.4163	24.7887	14.0035	19.961	17.8508	ENSG00000120053.10	GOT1	chr10:99396869-99430624	MB231_CTRL	MB231_W2	OK	25.1077	17.2718	-0.539715	-2.15696	0.00025	0.00209262	yes
ENSG00000120063.9	GNA13	40.5607	41.768	44.9275	29.4024	26.8035	29.0955	ENSG00000120063.9	GNA13	chr17:65010714-65056839	MB231_CTRL	MB231_W2	OK	42.4187	28.4338	-0.577095	-3.55431	5e-05	0.000503098	yes
ENSG00000120129.5	DUSP1	4.99049	7.08717	5.24346	2.758	4.13045	3.95636	ENSG00000120129.5	DUSP1	chr5:172758225-172777774	MB231_CTRL	MB231_W2	OK	5.77371	3.61494	-0.675526	-1.77404	0.00355	0.0194305	yes
ENSG00000120159.11	CAAP1	12.8236	15.5713	14.0499	11.637	8.36628	13.0399	ENSG00000120159.11	CAAP1	chr9:26840684-26892804	MB231_CTRL	MB231_W2	OK	14.1483	11.0144	-0.361238	-1.5259	0.00475	0.0247357	yes
ENSG00000120256.9	LRP11	22.0969	22.6126	22.652	9.48377	13.3958	10.0482	ENSG00000120256.9	LRP11	chr6:149724314-149923121	MB231_CTRL	MB231_W2	OK	22.4538	10.9759	-1.03262	-2.7114	5e-05	0.000503098	yes
ENSG00000120334.15	CENPL	18.743	21.9682	23.0095	31.1248	43.9466	28.2146	ENSG00000120334.15	CENPL	chr1:173799549-173858546	MB231_CTRL	MB231_W2	OK	21.2402	34.4287	0.69681	2.08648	0.0003	0.00245627	yes
ENSG00000120370.12	GORAB	4.95772	7.54667	6.08363	14.3907	16.623	17.248	ENSG00000120370.12	GORAB	chr1:170460452-170553446	MB231_CTRL	MB231_W2	OK	6.19601	16.0872	1.3765	4.21969	5e-05	0.000503098	yes
ENSG00000120458.10	MSANTD2	5.31107	8.73588	5.12167	10.3723	16.1034	16.9198	ENSG00000120458.10	MSANTD2	chr11:124766497-124834487	MB231_CTRL	MB231_W2	OK	6.38954	14.4652	1.1788	2.58661	5e-05	0.000503098	yes
ENSG00000120519.14	SLC10A7	2.76466	3.40534	2.58605	9.1215	5.57696	3.09201	ENSG00000120519.14	SLC10A7	chr4:146253974-146521964	MB231_CTRL	MB231_W2	OK	2.91868	5.93016	1.02275	1.42074	0.00065	0.00473038	yes
ENSG00000120526.10	NUDCD1	41.4309	44.0084	48.8985	31.0837	28.6268	34.2272	ENSG00000120526.10	NUDCD1	chr8:109240918-109345953	MB231_CTRL	MB231_W2	OK	44.7793	31.3126	-0.516089	-2.14655	0.00025	0.00209262	yes
ENSG00000120533.12	ENY2	39.564	36.5593	40.3919	53.8639	57.327	73.8516	ENSG00000120533.12	ENY2	chr8:109240918-109345953	MB231_CTRL	MB231_W2	OK	38.8384	61.6808	0.667338	1.79042	0.0021	0.0126444	yes
ENSG00000120616.15	EPC1	17.4196	13.0216	17.4195	25.0091	28.9921	28.6908	ENSG00000120616.15	EPC1	chr10:32266288-32378798	MB231_CTRL	MB231_W2	OK	15.9536	27.564	0.788905	2.06753	0.00045	0.00346901	yes
ENSG00000120662.15	MTRF1	1.31288	3.25173	1.98123	8.27739	6.87856	10.9682	ENSG00000120662.15	MTRF1	chr13:41132938-41263577	MB231_CTRL	MB231_W2	OK	2.18195	8.70805	1.99673	2.42066	5e-05	0.000503098	yes
ENSG00000120675.5	DNAJC15	10.3897	10.9895	8.49137	18.3551	21.1446	29.3637	ENSG00000120675.5	DNAJC15	chr13:43023202-43114224	MB231_CTRL	MB231_W2	OK	9.95687	22.9545	1.20501	3.03082	5e-05	0.000503098	yes
ENSG00000120686.11	UFM1	21.0065	24.1983	27.1679	30.6358	30.0556	34.3785	ENSG00000120686.11	UFM1	chr13:38349848-38363619	MB231_CTRL	MB231_W2	OK	24.1242	31.69	0.393544	1.71587	0.0024	0.0141469	yes
ENSG00000120690.14	ELF1	20.4916	19.3482	19.1961	12.0844	13.1202	15.7929	ENSG00000120690.14	ELF1	chr13:40931919-41084006	MB231_CTRL	MB231_W2	OK	19.6786	13.6658	-0.526059	-1.87427	0.0008	0.00564084	yes
ENSG00000120694.19	HSPH1	42.5848	51.8459	56.1009	28.683	27.2946	26.748	ENSG00000120694.19	HSPH1	chr13:31134973-31162388	MB231_CTRL	MB231_W2	OK	50.1772	27.5752	-0.863659	-3.33302	5e-05	0.000503098	yes
ENSG00000120697.8	ALG5	12.1867	13.9536	14.8895	20.0458	23.2421	24.3738	ENSG00000120697.8	ALG5	chr13:36949774-37059713	MB231_CTRL	MB231_W2	OK	13.6766	22.5539	0.72167	2.03894	0.00015	0.00134259	yes
ENSG00000120708.16	TGFBI	18.8562	21.0501	20.5417	28.1585	31.2672	40.1732	ENSG00000120708.16	TGFBI	chr5:136028894-136063818	MB231_CTRL	MB231_W2	OK	20.1493	33.1996	0.720436	2.47925	5e-05	0.000503098	yes
ENSG00000120727.12	PAIP2	57.1238	59.5236	61.9647	66.5955	76.0682	70.9237	ENSG00000120727.12	PAIP2	chr5:139341586-139384553	MB231_CTRL	MB231_W2	OK	59.5374	71.1958	0.257996	1.57697	0.0066	0.0320046	yes
ENSG00000120738.7	EGR1	3.35402	3.38829	3.77564	6.23666	8.66315	7.18509	ENSG00000120738.7	EGR1	chr5:138465489-138469315	MB231_CTRL	MB231_W2	OK	3.50599	7.36164	1.07021	3.81323	5e-05	0.000503098	yes
ENSG00000120756.12	PLS1	19.902	19.154	23.0162	7.9735	7.73197	10.3788	ENSG00000120756.12	PLS1	chr3:142596386-142713664	MB231_CTRL	MB231_W2	OK	20.6907	8.69475	-1.25077	-2.18909	0.0001	0.000939965	yes
ENSG00000120798.16	NR2C1	9.89272	10.8619	14.8475	21.3678	29.4105	19.8946	ENSG00000120798.16	NR2C1	chr12:95020228-95073703	MB231_CTRL	MB231_W2	OK	11.8674	23.5577	0.989197	2.30457	5e-05	0.000503098	yes
ENSG00000120802.13	TMPO	99.7276	101.039	110.404	74.6678	75.6835	77.7226	ENSG00000120802.13	TMPO	chr12:98512972-98550379	MB231_CTRL	MB231_W2	OK	103.724	76.0246	-0.448205	-2.05614	0.00115	0.00769031	yes
ENSG00000120885.20	CLU	101.173	105.353	113.632	28.3917	35.4972	28.0786	ENSG00000120885.20	CLU	chr8:27596916-27615031	MB231_CTRL	MB231_W2	OK	106.719	30.6558	-1.79959	-4.18803	5e-05	0.000503098	yes
ENSG00000120913.23	PDLIM2	12.9342	12.7232	11.2129	15.479	20.1938	17.0137	ENSG00000120913.23	PDLIM2	chr8:22578278-22604150	MB231_CTRL	MB231_W2	OK	12.2901	17.5622	0.514973	1.26532	0.0102	0.0451989	yes
ENSG00000120942.13	UBIAD1	10.8572	11.0138	11.5541	7.51504	7.43671	9.47226	ENSG00000120942.13	UBIAD1	chr1:11273205-11296049	MB231_CTRL	MB231_W2	OK	11.1417	8.14134	-0.452632	-1.60686	0.0065	0.0316088	yes
ENSG00000120948.15	TARDBP	192.401	200.024	204.087	139.455	112.795	115.22	ENSG00000120948.15	TARDBP	chr1:11012343-11047233	MB231_CTRL	MB231_W2	OK	198.837	122.49	-0.698928	-2.36752	0.0001	0.000939965	yes
ENSG00000120963.11	ZNF706	49.4737	52.59	44.4372	58.8584	66.3141	60.9047	ENSG00000120963.11	ZNF706	chr8:101177877-101206193	MB231_CTRL	MB231_W2	OK	48.8336	62.0257	0.344992	1.47025	0.00755	0.0357277	yes
ENSG00000120992.17	LYPLA1	65.1174	50.8593	53.2388	95.8677	121.652	105.424	ENSG00000120992.17	LYPLA1	chr8:54046366-54102017	MB231_CTRL	MB231_W2	OK	56.4051	107.648	0.932425	3.04631	5e-05	0.000503098	yes
ENSG00000121060.15	TRIM25	40.3402	41.7851	48.1539	28.7725	31.2964	24.0855	ENSG00000121060.15	TRIM25	chr17:56887908-56914038	MB231_CTRL	MB231_W2	OK	43.4264	28.0515	-0.630495	-1.79406	0.00105	0.00712483	yes
ENSG00000121274.12	PAPD5	7.46045	7.37165	7.14486	5.44135	4.74415	6.95022	ENSG00000121274.12	PAPD5	chr16:50152917-50235310	MB231_CTRL	MB231_W2	OK	7.32565	5.71191	-0.358984	-1.64496	0.00405	0.0216567	yes
ENSG00000121310.16	ECHDC2	11.4662	11.6099	11.9579	23.246	28.5995	33.4984	ENSG00000121310.16	ECHDC2	chr1:52895909-52927212	MB231_CTRL	MB231_W2	OK	11.678	28.448	1.28453	2.91459	5e-05	0.000503098	yes
ENSG00000121316.10	PLBD1	4.61021	5.0489	5.31661	4.05238	2.73989	2.30154	ENSG00000121316.10	PLBD1	chr12:14503660-14757963	MB231_CTRL	MB231_W2	OK	4.99191	3.03127	-0.71967	-1.51515	0.00425	0.0225604	yes
ENSG00000121390.18	PSPC1	28.851	31.8816	32.3406	20.5013	21.2314	17.0018	ENSG00000121390.18	PSPC1	chr13:19674623-19783019	MB231_CTRL	MB231_W2	OK	31.0244	19.5782	-0.664157	-3.07618	5e-05	0.000503098	yes
ENSG00000121413.12	ZSCAN18	13.1742	13.9502	14.4639	17.2909	26.8914	19.9239	ENSG00000121413.12	ZSCAN18	chr19:58059238-58118427	MB231_CTRL	MB231_W2	OK	13.8628	21.3687	0.624288	1.65831	0.001	0.00683457	yes
ENSG00000121417.13	ZNF211	5.8155	5.11179	7.45279	10.4713	10.002	12.1399	ENSG00000121417.13	ZNF211	chr19:57630394-57642779	MB231_CTRL	MB231_W2	OK	6.12669	10.8711	0.827312	1.60483	0.0018	0.0111376	yes
ENSG00000121486.11	TRMT1L	8.55793	9.61423	9.46055	5.79914	4.2818	4.33423	ENSG00000121486.11	TRMT1L	chr1:185118097-185157072	MB231_CTRL	MB231_W2	OK	9.2109	4.80506	-0.938788	-2.66938	5e-05	0.000503098	yes
ENSG00000121542.11	SEC22A	8.11096	7.55278	10.6824	13.592	19.9294	13.1353	ENSG00000121542.11	SEC22A	chr3:123067061-123274130	MB231_CTRL	MB231_W2	OK	8.78204	15.5522	0.824494	1.30198	0.0104	0.0458917	yes
ENSG00000121579.12	NAA50	101.023	103.799	102.671	63.6008	74.1224	75.6781	ENSG00000121579.12	NAA50	chr3:113716459-113746300	MB231_CTRL	MB231_W2	OK	102.498	71.1338	-0.526983	-2.07852	0.00015	0.00134259	yes
ENSG00000121621.6	KIF18A	17.5391	20.0772	18.3251	24.0641	26.3716	26.445	ENSG00000121621.6	KIF18A	chr11:28020619-28527041	MB231_CTRL	MB231_W2	OK	18.6471	25.6269	0.458705	1.48772	0.0116	0.0499123	yes
ENSG00000121691.4	CAT	25.9474	24.4542	24.4025	18.969	14.6956	17.8064	ENSG00000121691.4	CAT	chr11:34438924-34472062	MB231_CTRL	MB231_W2	OK	24.9347	17.157	-0.539361	-1.9543	0.00025	0.00209262	yes
ENSG00000121716.19	PILRB	0.755856	1.93617	0.498046	9.33778	8.52117	12.319	ENSG00000121716.19	PILRB	chr7:100307701-100400099	MB231_CTRL	MB231_W2	OK	1.06336	10.0593	3.24184	0.865335	5e-05	0.000503098	yes
ENSG00000121741.16	ZMYM2	4.73572	6.86718	5.3889	14.7578	13.0193	16.0553	ENSG00000121741.16	ZMYM2	chr13:19958669-20091829	MB231_CTRL	MB231_W2	OK	5.66393	14.6108	1.36716	2.67815	5e-05	0.000503098	yes
ENSG00000121743.3	GJA3	3.14505	2.97704	3.5501	1.41143	1.52634	1.5572	ENSG00000121743.3	GJA3	chr13:20138254-20161049	MB231_CTRL	MB231_W2	OK	3.22406	1.49832	-1.10553	-3.40326	5e-05	0.000503098	yes
ENSG00000121774.17	KHDRBS1	84.5707	88.6142	98.9573	47.3869	56.3688	55.9705	ENSG00000121774.17	KHDRBS1	chr1:32013828-32102866	MB231_CTRL	MB231_W2	OK	90.7141	53.2421	-0.76876	-4.46678	5e-05	0.000503098	yes
ENSG00000121858.10	TNFSF10	18.5241	22.6296	22.6517	28.6923	31.5406	32.6657	ENSG00000121858.10	TNFSF10	chr3:172505507-172523507	MB231_CTRL	MB231_W2	OK	21.2685	30.9662	0.541978	3.02112	5e-05	0.000503098	yes
ENSG00000121940.15	CLCC1	17.0303	20.8093	21.5995	11.4998	15.1058	13.7187	ENSG00000121940.15	CLCC1	chr1:108815897-108963484	MB231_CTRL	MB231_W2	OK	19.813	13.4414	-0.559764	-1.54725	0.005	0.025747	yes
ENSG00000122026.10	RPL21	56.7168	56.2059	53.0912	65.3593	86.7856	84.2788	ENSG00000122026.10	RPL21	chr13:27251308-27256691	MB231_CTRL	MB231_W2	OK	55.338	78.8079	0.51007	1.7575	0.00155	0.00984337	yes
ENSG00000122085.16	MTERF4	10.8097	7.95062	8.72883	14.5337	17.0223	19.015	ENSG00000122085.16	MTERF4	chr2:240998837-241102332	MB231_CTRL	MB231_W2	OK	9.16304	16.857	0.879448	1.91152	5e-05	0.000503098	yes
ENSG00000122140.10	MRPS2	87.1356	78.1974	61.4993	56.9268	61.6776	44.153	ENSG00000122140.10	MRPS2	chr9:135495180-135506447	MB231_CTRL	MB231_W2	OK	75.6108	54.2525	-0.478903	-1.60008	0.005	0.025747	yes
ENSG00000122299.11	ZC3H7A	21.5772	24.3469	19.5577	35.6487	27.1948	27.6116	ENSG00000122299.11	ZC3H7A	chr16:11750585-11797267	MB231_CTRL	MB231_W2	OK	21.8273	30.1517	0.466105	1.41696	0.0099	0.0441799	yes
ENSG00000122378.13	FAM213A	19.6497	21.1099	21.5167	13.0902	15.6785	17.0477	ENSG00000122378.13	FAM213A	chr10:80407828-80437115	MB231_CTRL	MB231_W2	OK	20.7588	15.2721	-0.44282	-2.01054	0.0006	0.00442867	yes
ENSG00000122417.15	ODF2L	18.5112	16.2833	15.3755	26.2547	31.6234	46.6892	ENSG00000122417.15	ODF2L	chr1:86346823-86396342	MB231_CTRL	MB231_W2	OK	16.7233	34.8558	1.05954	2.43982	5e-05	0.000503098	yes
ENSG00000122481.16	RWDD3	5.44942	5.85252	5.03197	7.69718	13.126	12.6311	ENSG00000122481.16	RWDD3	chr1:95117337-95278940	MB231_CTRL	MB231_W2	OK	5.44464	11.1514	1.03432	2.08583	0.00045	0.00346901	yes
ENSG00000122490.18	PQLC1	16.2032	17.3637	17.6387	7.34625	9.59491	8.82503	ENSG00000122490.18	PQLC1	chr18:79902419-79951664	MB231_CTRL	MB231_W2	OK	17.0685	8.58873	-0.990821	-2.6351	5e-05	0.000503098	yes
ENSG00000122515.14	ZMIZ2	38.2406	41.7431	36.1633	50.9129	69.5621	59.5317	ENSG00000122515.14	ZMIZ2	chr7:44748580-44769881	MB231_CTRL	MB231_W2	OK	38.7157	60.0022	0.632098	2.95108	5e-05	0.000503098	yes
ENSG00000122642.10	FKBP9	38.2865	37.4865	34.4151	23.3528	20.4896	31.618	ENSG00000122642.10	FKBP9	chr7:32957403-33006931	MB231_CTRL	MB231_W2	OK	36.7294	25.1535	-0.546176	-1.79422	0.0013	0.00851582	yes
ENSG00000122644.12	ARL4A	18.6908	21.7249	22.9607	30.8585	33.202	31.0113	ENSG00000122644.12	ARL4A	chr7:12686855-12690934	MB231_CTRL	MB231_W2	OK	21.1255	31.6906	0.585073	2.87044	5e-05	0.000503098	yes
ENSG00000122678.15	POLM	5.93959	7.18186	6.51442	12.2719	12.7877	17.5758	ENSG00000122678.15	POLM	chr7:44072246-44082540	MB231_CTRL	MB231_W2	OK	6.54529	14.2118	1.11856	1.17788	0.0016	0.0101235	yes
ENSG00000122692.8	SMU1	20.7685	23.7114	22.7744	14.3094	15.0498	13.5604	ENSG00000122692.8	SMU1	chr9:33041763-33076659	MB231_CTRL	MB231_W2	OK	22.4181	14.3065	-0.647988	-4.12777	5e-05	0.000503098	yes
ENSG00000122729.18	ACO1	40.5861	42.7914	43.3604	18.6335	19.7926	19.1399	ENSG00000122729.18	ACO1	chr9:32384602-32454769	MB231_CTRL	MB231_W2	OK	42.246	19.1886	-1.13856	-6.31426	5e-05	0.000503098	yes
ENSG00000122778.9	KIAA1549	7.53712	8.54667	7.77617	5.7282	5.8989	6.52302	ENSG00000122778.9	KIAA1549	chr7:138706294-138981318	MB231_CTRL	MB231_W2	OK	7.95332	6.05004	-0.394613	-1.74212	0.00255	0.014853	yes
ENSG00000122779.17	TRIM24	15.77	18.0098	14.0869	8.53836	7.72885	7.36171	ENSG00000122779.17	TRIM24	chr7:138460333-138589993	MB231_CTRL	MB231_W2	OK	15.9556	7.87631	-1.01847	-3.80512	5e-05	0.000503098	yes
ENSG00000122862.4	SRGN	7.58867	5.39216	4.38728	12.992	15.6659	14.3035	ENSG00000122862.4	SRGN	chr10:69088105-69104811	MB231_CTRL	MB231_W2	OK	5.78937	14.3205	1.3066	3.32853	5e-05	0.000503098	yes
ENSG00000122863.5	CHST3	13.8323	15.349	15.7526	7.38865	9.32135	9.21621	ENSG00000122863.5	CHST3	chr10:71964364-72013564	MB231_CTRL	MB231_W2	OK	14.978	8.64207	-0.793393	-4.9041	5e-05	0.000503098	yes
ENSG00000122870.11	BICC1	7.15686	8.64972	8.7492	6.18876	5.64634	5.94481	ENSG00000122870.11	BICC1	chr10:58513139-58831437	MB231_CTRL	MB231_W2	OK	8.18526	5.92664	-0.465814	-2.26521	0.0001	0.000939965	yes
ENSG00000122884.12	P4HA1	43.9758	48.6269	48.0834	32.1952	29.1212	31.6758	ENSG00000122884.12	P4HA1	chr10:73007216-73096974	MB231_CTRL	MB231_W2	OK	46.8954	30.9974	-0.597296	-3.40948	5e-05	0.000503098	yes
ENSG00000122912.14	SLC25A16	6.1838	4.13382	5.04425	12.7099	8.45042	13.7017	ENSG00000122912.14	SLC25A16	chr10:68477998-68527474	MB231_CTRL	MB231_W2	OK	5.12062	11.6207	1.1823	1.43547	0.0032	0.0178059	yes
ENSG00000122952.16	ZWINT	37.8093	44.3079	41.3899	52.3763	58.024	58.2554	ENSG00000122952.16	ZWINT	chr10:56357227-56361275	MB231_CTRL	MB231_W2	OK	41.1691	56.2186	0.449486	2.62856	5e-05	0.000503098	yes
ENSG00000122958.14	VPS26A	38.6057	48.4934	49.6205	35.1647	34.1006	39.3881	ENSG00000122958.14	VPS26A	chr10:69123511-69172861	MB231_CTRL	MB231_W2	OK	45.5732	36.2178	-0.331486	-1.84914	0.00175	0.0108959	yes
ENSG00000122965.10	RBM19	6.33116	7.63332	6.97928	10.3835	11.4536	14.3098	ENSG00000122965.10	RBM19	chr12:113816737-113966371	MB231_CTRL	MB231_W2	OK	6.98125	12.049	0.787352	2.54243	5e-05	0.000503098	yes
ENSG00000123136.14	DDX39A	67.8998	74.1748	64.3717	88.7627	119.641	97.6331	ENSG00000123136.14	DDX39A	chr19:14408818-14419383	MB231_CTRL	MB231_W2	OK	68.8154	102.012	0.567936	3.09444	5e-05	0.000503098	yes
ENSG00000123144.10	C19orf43	106.45	104.311	115.263	69.2464	86.8838	88.2513	ENSG00000123144.10	C19orf43	chr19:12730639-12734775	MB231_CTRL	MB231_W2	OK	108.675	81.4605	-0.415844	-2.59779	5e-05	0.000503098	yes
ENSG00000123146.19	ADGRE5	119.435	113.319	102.549	78.0041	90.2352	75.5874	ENSG00000123146.19	ADGRE5	chr19:14380500-14408725	MB231_CTRL	MB231_W2	OK	111.768	81.2756	-0.459611	-1.94495	0.00075	0.00534003	yes
ENSG00000123159.15	GIPC1	59.6768	73.8534	62.4827	41.5157	55.0259	33.2462	ENSG00000123159.15	GIPC1	chr19:14477759-14496149	MB231_CTRL	MB231_W2	OK	65.3377	43.2626	-0.594795	-2.70169	5e-05	0.000503098	yes
ENSG00000123179.13	EBPL	18.3556	16.9908	14.4586	22.6613	26.7482	24.8041	ENSG00000123179.13	EBPL	chr13:49660722-49691475	MB231_CTRL	MB231_W2	OK	16.6016	24.7379	0.575394	1.78348	0.00115	0.00769031	yes
ENSG00000123213.22	NLN	14.7659	16.4923	16.4025	8.54688	8.53798	5.80988	ENSG00000123213.22	NLN	chr5:65589679-65871725	MB231_CTRL	MB231_W2	OK	15.8869	7.63158	-1.05778	-1.78641	0.0039	0.020982	yes
ENSG00000123219.12	CENPK	34.9456	45.3895	44.3522	88.008	99.6275	110.069	ENSG00000123219.12	CENPK	chr5:65517765-65563171	MB231_CTRL	MB231_W2	OK	41.5624	99.2348	1.25557	5.31628	5e-05	0.000503098	yes
ENSG00000123240.16	OPTN	46.8885	56.0168	62.4529	39.2801	32.3471	41.7306	ENSG00000123240.16	OPTN	chr10:12896624-13138308	MB231_CTRL	MB231_W2	OK	55.1194	37.7859	-0.544712	-1.76917	0.0028	0.01604	yes
ENSG00000123374.10	CDK2	36.75	39.6301	41.5018	60.565	54.9644	55.8321	ENSG00000123374.10	CDK2	chr12:55954104-55973317	MB231_CTRL	MB231_W2	OK	39.294	57.1205	0.539701	2.86408	5e-05	0.000503098	yes
ENSG00000123384.13	LRP1	1.96084	2.34815	2.41245	6.17211	4.64067	6.71744	ENSG00000123384.13	LRP1	chr12:57088893-57213351	MB231_CTRL	MB231_W2	OK	2.24048	5.84341	1.383	1.11851	0.00045	0.00346901	yes
ENSG00000123395.14	ATG101	17.691	16.4179	20.0229	10.4797	11.4541	15.8395	ENSG00000123395.14	ATG101	chr12:52069245-52108261	MB231_CTRL	MB231_W2	OK	18.0439	12.5911	-0.51911	-1.91418	0.0005	0.00379645	yes
ENSG00000123415.15	SMUG1	9.7544	9.70828	6.30002	11.0542	14.4326	19.8068	ENSG00000123415.15	SMUG1	chr12:54058253-54189008	MB231_CTRL	MB231_W2	OK	8.58757	15.0979	0.814022	1.27675	0.0026	0.0150954	yes
ENSG00000123416.15	TUBA1B	863.424	940.938	916.971	571.153	677.288	624.496	ENSG00000123416.15	TUBA1B	chr12:49127781-49147869	MB231_CTRL	MB231_W2	OK	907.111	624.312	-0.539012	-3.15789	5e-05	0.000503098	yes
ENSG00000123485.11	HJURP	26.8435	28.6514	29.1545	59.2413	61.049	57.5639	ENSG00000123485.11	HJURP	chr2:233775678-233854566	MB231_CTRL	MB231_W2	OK	28.2165	59.2848	1.07112	4.98328	5e-05	0.000503098	yes
ENSG00000123552.17	USP45	3.59305	3.64087	4.77027	7.38715	9.72209	7.14638	ENSG00000123552.17	USP45	chr6:99432378-99531918	MB231_CTRL	MB231_W2	OK	4.0014	8.08521	1.01478	1.7988	5e-05	0.000503098	yes
ENSG00000123562.16	MORF4L2	92.9226	103.659	102.239	123.221	154.452	131.311	ENSG00000123562.16	MORF4L2	chrX:103675495-103691772	MB231_CTRL	MB231_W2	OK	99.6069	136.328	0.452765	1.79163	0.00245	0.0143789	yes
ENSG00000123570.3	RAB9B	1.20007	1.73284	1.22114	2.68638	3.39906	2.15929	ENSG00000123570.3	RAB9B	chrX:103822321-103832228	MB231_CTRL	MB231_W2	OK	1.38468	2.74825	0.988958	2.4975	5e-05	0.000503098	yes
ENSG00000123609.10	NMI	10.7541	14.5314	14.2605	8.10374	7.67465	7.99129	ENSG00000123609.10	NMI	chr2:151270464-151290057	MB231_CTRL	MB231_W2	OK	13.182	7.92323	-0.734408	-2.02466	0.0001	0.000939965	yes
ENSG00000123737.12	EXOSC9	38.5709	43.4748	50.7686	77.9735	87.5348	60.2604	ENSG00000123737.12	EXOSC9	chr4:121801316-121823933	MB231_CTRL	MB231_W2	OK	44.2715	75.2562	0.765434	1.52698	0.01045	0.0460694	yes
ENSG00000123843.12	C4BPB	17.4957	17.0736	15.9592	25.1915	40.218	39.2832	ENSG00000123843.12	C4BPB	chr1:207088841-207099993	MB231_CTRL	MB231_W2	OK	16.8429	34.8976	1.05099	3.9046	5e-05	0.000503098	yes
ENSG00000123975.4	CKS2	184.278	187.512	179.903	463.373	491.528	544.538	ENSG00000123975.4	CKS2	chr9:89311197-89316703	MB231_CTRL	MB231_W2	OK	183.898	499.813	1.44248	8.73468	5e-05	0.000503098	yes
ENSG00000123989.13	CHPF	28.513	25.8942	26.2568	13.2432	17.2907	15.7085	ENSG00000123989.13	CHPF	chr2:219538946-219550595	MB231_CTRL	MB231_W2	OK	26.888	15.4141	-0.802709	-3.71886	5e-05	0.000503098	yes
ENSG00000124067.16	SLC12A4	16.3072	15.3351	11.1446	21.1658	29.633	26.4755	ENSG00000124067.16	SLC12A4	chr16:67939749-67969601	MB231_CTRL	MB231_W2	OK	14.2623	25.7581	0.85282	2.28813	0.0001	0.000939965	yes
ENSG00000124098.9	FAM210B	26.8521	26.1864	26.2256	16.64	16.2018	14.9973	ENSG00000124098.9	FAM210B	chr20:56358914-56368663	MB231_CTRL	MB231_W2	OK	26.4214	15.9463	-0.72848	-3.67914	5e-05	0.000503098	yes
ENSG00000124120.10	TTPAL	7.03899	8.70138	8.86503	5.69549	7.17365	5.72691	ENSG00000124120.10	TTPAL	chr20:44475885-44494603	MB231_CTRL	MB231_W2	OK	8.2018	6.19868	-0.403978	-1.66382	0.0036	0.0196502	yes
ENSG00000124145.6	SDC4	176.173	181.916	193.236	121.233	135.706	126.737	ENSG00000124145.6	SDC4	chr20:45325287-45348424	MB231_CTRL	MB231_W2	OK	183.775	127.892	-0.523011	-3.22807	5e-05	0.000503098	yes
ENSG00000124160.11	NCOA5	29.9421	27.1781	27.1833	20.62	24.7476	24.5641	ENSG00000124160.11	NCOA5	chr20:46060984-46089952	MB231_CTRL	MB231_W2	OK	28.1012	23.3105	-0.269648	-1.51794	0.00765	0.0361061	yes
ENSG00000124171.8	PARD6B	96.6821	90.8215	116.037	64.0088	61.7061	89.5672	ENSG00000124171.8	PARD6B	chr20:50731543-50756795	MB231_CTRL	MB231_W2	OK	101.18	71.7607	-0.495659	-1.55522	0.0065	0.0316088	yes
ENSG00000124172.9	ATP5E	80.2921	83.5933	83.366	138.678	146.697	162.758	ENSG00000124172.9	ATP5E	chr20:59019253-59032382	MB231_CTRL	MB231_W2	OK	82.4171	149.378	0.857948	4.18851	5e-05	0.000503098	yes
ENSG00000124193.14	SRSF6	63.4867	62.906	69.4724	96.0083	100.588	95.066	ENSG00000124193.14	SRSF6	chr20:43457927-43464247	MB231_CTRL	MB231_W2	OK	65.2884	97.2209	0.57444	3.30867	5e-05	0.000503098	yes
ENSG00000124207.16	CSE1L	116.825	125.612	127.157	81.9503	77.4898	72.0201	ENSG00000124207.16	CSE1L	chr20:49046245-49096960	MB231_CTRL	MB231_W2	OK	123.198	77.1534	-0.675178	-4.01672	5e-05	0.000503098	yes
ENSG00000124214.19	STAU1	63.8911	66.8142	67.5531	42.9057	46.1739	45.6981	ENSG00000124214.19	STAU1	chr20:49113338-49188367	MB231_CTRL	MB231_W2	OK	66.0861	44.9259	-0.5568	-2.84854	5e-05	0.000503098	yes
ENSG00000124222.22	STX16	10.6653	12.6733	13.6706	17.1572	16.3816	16.5859	ENSG00000124222.22	STX16	chr20:58651252-58719238	MB231_CTRL	MB231_W2	OK	12.3364	16.7082	0.437634	1.73902	0.0012	0.00797254	yes
ENSG00000124224.16	PPP4R1L	10.0236	9.56617	7.7461	15.8303	26.2591	25.3767	ENSG00000124224.16	PPP4R1L	chr20:58228939-58309439	MB231_CTRL	MB231_W2	OK	9.11196	22.4887	1.30337	2.85639	5e-05	0.000503098	yes
ENSG00000124226.10	RNF114	29.8211	28.4043	31.599	33.4043	44.2294	41.8512	ENSG00000124226.10	RNF114	chr20:49936335-49953892	MB231_CTRL	MB231_W2	OK	29.9415	39.8283	0.411649	1.7442	0.00315	0.0175845	yes
ENSG00000124299.13	PEPD	54.3238	48.2927	50.7663	23.7034	34.3008	27.3333	ENSG00000124299.13	PEPD	chr19:33386949-33521794	MB231_CTRL	MB231_W2	OK	51.1276	28.4458	-0.845886	-2.94563	5e-05	0.000503098	yes
ENSG00000124370.10	MCEE	3.21599	2.43045	2.44245	5.37542	7.403	8.01971	ENSG00000124370.10	MCEE	chr2:71109683-71130239	MB231_CTRL	MB231_W2	OK	2.6963	6.93271	1.36244	1.75442	0.0006	0.00442867	yes
ENSG00000124422.11	USP22	82.5565	87.2039	86.3425	63.3229	71.2109	66.4725	ENSG00000124422.11	USP22	chr17:20814619-21043760	MB231_CTRL	MB231_W2	OK	85.3676	67.0021	-0.349483	-1.54364	0.0049	0.0253321	yes
ENSG00000124444.15	ZNF576	5.49436	5.31411	5.52419	8.93283	7.52978	9.55314	ENSG00000124444.15	ZNF576	chr19:43596391-43619874	MB231_CTRL	MB231_W2	OK	5.44422	8.67192	0.671625	1.50154	0.00665	0.0322099	yes
ENSG00000124486.12	USP9X	54.081	54.6081	59.3671	21.1527	24.645	26.2801	ENSG00000124486.12	USP9X	chrX:41085634-41236579	MB231_CTRL	MB231_W2	OK	56.0187	24.0259	-1.22132	-3.53902	5e-05	0.000503098	yes
ENSG00000124496.12	TRERF1	20.1514	22.0499	20.3162	16.3718	17.5482	16.217	ENSG00000124496.12	TRERF1	chr6:42224930-42452051	MB231_CTRL	MB231_W2	OK	20.8392	16.7123	-0.318383	-1.93352	0.0008	0.00564084	yes
ENSG00000124508.16	BTN2A2	6.46155	7.34578	9.79661	14.849	13.1214	19.3947	ENSG00000124508.16	BTN2A2	chr6:26383095-26394874	MB231_CTRL	MB231_W2	OK	7.86798	15.7883	1.00479	2.08489	5e-05	0.000503098	yes
ENSG00000124535.15	WRNIP1	38.2992	43.7192	42.5081	24.6004	29.2769	25.279	ENSG00000124535.15	WRNIP1	chr6:2765413-2786952	MB231_CTRL	MB231_W2	OK	41.5088	26.3855	-0.653675	-3.6504	5e-05	0.000503098	yes
ENSG00000124549.14	BTN2A3P	1.89132	1.63165	2.06194	4.92353	10.8456	9.68267	ENSG00000124549.14	BTN2A3P	chr6:26421390-26432383	MB231_CTRL	MB231_W2	OK	1.86164	8.48393	2.18816	3.49329	5e-05	0.000503098	yes
ENSG00000124574.14	ABCC10	6.55062	10.3669	6.42599	14.8787	16.8944	16.1579	ENSG00000124574.14	ABCC10	chr6:43427365-43456632	MB231_CTRL	MB231_W2	OK	7.78117	15.977	1.03794	1.48845	0.0041	0.0218807	yes
ENSG00000124587.13	PEX6	19.7615	22.8154	21.0513	13.675	13.7096	14.966	ENSG00000124587.13	PEX6	chr6:42960757-42979220	MB231_CTRL	MB231_W2	OK	21.2094	14.1169	-0.58728	-3.10285	5e-05	0.000503098	yes
ENSG00000124608.4	AARS2	5.00251	5.66064	5.03402	9.74466	8.38726	11.394	ENSG00000124608.4	AARS2	chr6:44270465-44378957	MB231_CTRL	MB231_W2	OK	5.23239	9.84199	0.91148	3.08144	5e-05	0.000503098	yes
ENSG00000124614.13	RPS10	963.411	986.518	908.535	996.093	1279.59	1248.28	ENSG00000124614.13	RPS10	chr6:34246379-34426125	MB231_CTRL	MB231_W2	OK	952.821	1174.66	0.30196	1.46789	0.01095	0.0478279	yes
ENSG00000124635.8	HIST1H2BJ	600.484	658.998	639.594	827.368	1013.2	968.401	ENSG00000124635.8	HIST1H2BJ	chr6:27125896-27132750	MB231_CTRL	MB231_W2	OK	633.025	936.324	0.564745	3.18802	5e-05	0.000503098	yes
ENSG00000124641.15	MED20	40.4274	44.237	43.6258	27.2824	44.3405	30.969	ENSG00000124641.15	MED20	chr6:41905353-41921139	MB231_CTRL	MB231_W2	OK	42.7634	34.1973	-0.322495	-1.54906	0.00775	0.0364418	yes
ENSG00000124664.10	SPDEF	3.2648	3.20249	3.8916	4.04209	7.75165	5.73405	ENSG00000124664.10	SPDEF	chr6:34537801-34556333	MB231_CTRL	MB231_W2	OK	3.45296	5.8426	0.758774	2.11015	0.0008	0.00564084	yes
ENSG00000124766.6	SOX4	1.39038	1.71609	1.60039	2.49776	3.42147	2.2321	ENSG00000124766.6	SOX4	chr6:21528738-21598619	MB231_CTRL	MB231_W2	OK	1.56895	2.71711	0.792273	2.61198	5e-05	0.000503098	yes
ENSG00000124767.6	GLO1	170.04	200.526	198.748	141.082	138.301	141.883	ENSG00000124767.6	GLO1	chr6:38675924-38703141	MB231_CTRL	MB231_W2	OK	189.771	140.422	-0.434495	-2.62656	5e-05	0.000503098	yes
ENSG00000124783.12	SSR1	123.327	137.231	136.921	97.1324	114.093	103.583	ENSG00000124783.12	SSR1	chr6:7268305-7418037	MB231_CTRL	MB231_W2	OK	132.493	104.936	-0.336405	-1.71849	0.0019	0.0116365	yes
ENSG00000124788.17	ATXN1	14.824	16.834	16.0293	23.8486	22.7554	25.4142	ENSG00000124788.17	ATXN1	chr6:16299111-16762652	MB231_CTRL	MB231_W2	OK	15.8958	24.0061	0.594755	1.97066	0.0007	0.00502945	yes
ENSG00000124795.14	DEK	216.53	250.559	270.108	171.03	169.499	177.291	ENSG00000124795.14	DEK	chr6:18223867-18264823	MB231_CTRL	MB231_W2	OK	245.732	172.607	-0.509601	-2.61764	5e-05	0.000503098	yes
ENSG00000124942.13	AHNAK	73.8471	81.5667	87.1202	40.3931	49.9675	46.4771	ENSG00000124942.13	AHNAK	chr11:62433541-62556235	MB231_CTRL	MB231_W2	OK	80.8447	45.6125	-0.825722	-2.12392	5e-05	0.000503098	yes
ENSG00000125166.12	GOT2	72.1824	71.6632	79.7076	42.01	49.5521	51.0742	ENSG00000125166.12	GOT2	chr16:58707130-59108974	MB231_CTRL	MB231_W2	OK	74.5177	47.5455	-0.648276	-2.59811	5e-05	0.000503098	yes
ENSG00000125249.6	RAP2A	15.2131	17.4253	16.3155	11.18	11.2084	11.4393	ENSG00000125249.6	RAP2A	chr13:97434221-97469128	MB231_CTRL	MB231_W2	OK	16.3179	11.2759	-0.533213	-2.92728	5e-05	0.000503098	yes
ENSG00000125266.6	EFNB2	19.6572	21.1827	21.4003	14.4726	15.136	15.4502	ENSG00000125266.6	EFNB2	chr13:106489730-106535114	MB231_CTRL	MB231_W2	OK	20.7468	15.0196	-0.466038	-2.90074	5e-05	0.000503098	yes
ENSG00000125304.8	TM9SF2	39.5826	45.3696	44.8938	25.2191	24.8253	20.8521	ENSG00000125304.8	TM9SF2	chr13:99501416-99564006	MB231_CTRL	MB231_W2	OK	43.282	23.6321	-0.873017	-4.87477	5e-05	0.000503098	yes
ENSG00000125351.11	UPF3B	3.93722	5.29624	5.59309	7.86021	6.34343	6.47343	ENSG00000125351.11	UPF3B	chrX:119805310-119852998	MB231_CTRL	MB231_W2	OK	4.94218	6.89236	0.479849	2.40389	5e-05	0.000503098	yes
ENSG00000125354.22	44445	5.23577	5.9353	7.08939	3.609	3.84852	4.91773	ENSG00000125354.22	44445	chrX:119615723-119693370	MB231_CTRL	MB231_W2	OK	6.08682	4.12508	-0.561264	-1.96332	0.00075	0.00534003	yes
ENSG00000125356.6	NDUFA1	52.0462	50.4423	41.6617	58.6283	80.5442	81.0115	ENSG00000125356.6	NDUFA1	chrX:119870474-119876662	MB231_CTRL	MB231_W2	OK	48.0501	73.3947	0.611136	2.50051	5e-05	0.000503098	yes
ENSG00000125375.14	ATP5S	4.35931	3.60611	4.45431	11.5122	9.86734	15.1491	ENSG00000125375.14	ATP5S	chr14:50237562-50416461	MB231_CTRL	MB231_W2	OK	4.13991	12.1762	1.55639	2.28177	5e-05	0.000503098	yes
ENSG00000125378.15	BMP4	275.708	289.1	311.931	207.29	236.753	245.887	ENSG00000125378.15	BMP4	chr14:53949735-53958761	MB231_CTRL	MB231_W2	OK	292.246	229.977	-0.345698	-1.55071	0.0072	0.0343723	yes
ENSG00000125386.15	FAM193A	5.47059	6.31397	6.89526	8.55494	8.28319	11.5971	ENSG00000125386.15	FAM193A	chr4:2418973-2732565	MB231_CTRL	MB231_W2	OK	6.22661	9.47843	0.606201	1.68887	0.00195	0.0118792	yes
ENSG00000125398.5	SOX9	65.7185	71.8902	64.2796	34.0449	39.8712	39.6695	ENSG00000125398.5	SOX9	chr17:72021850-72237203	MB231_CTRL	MB231_W2	OK	67.2961	37.8619	-0.829777	-5.19511	5e-05	0.000503098	yes
ENSG00000125430.8	HS3ST3B1	12.5334	13.8952	13.6301	8.78519	9.83576	8.43453	ENSG00000125430.8	HS3ST3B1	chr17:14301082-14349404	MB231_CTRL	MB231_W2	OK	13.3529	9.01849	-0.566194	-2.50041	5e-05	0.000503098	yes
ENSG00000125434.10	SLC25A35	1.24092	1.56195	1.64287	3.0451	3.74653	3.21364	ENSG00000125434.10	SLC25A35	chr17:8287762-8295343	MB231_CTRL	MB231_W2	OK	1.48191	3.33509	1.17026	1.25774	0.0057	0.0285551	yes
ENSG00000125447.16	GGA3	9.89231	16.8365	12.7558	20.9918	32.9675	24.2414	ENSG00000125447.16	GGA3	chr17:75236598-75271227	MB231_CTRL	MB231_W2	OK	13.1615	26.0669	0.985894	1.72728	0.00145	0.00933362	yes
ENSG00000125450.10	NUP85	26.8704	26.1713	32.3149	39.885	45.0511	36.3464	ENSG00000125450.10	NUP85	chr17:75205658-75235758	MB231_CTRL	MB231_W2	OK	28.4522	40.4275	0.506797	1.55068	0.0025	0.0146112	yes
ENSG00000125484.11	GTF3C4	19.4434	22.0462	21.1062	10.5983	13.2293	12.8186	ENSG00000125484.11	GTF3C4	chr9:132592996-132694955	MB231_CTRL	MB231_W2	OK	20.8653	12.2154	-0.772403	-4.1483	5e-05	0.000503098	yes
ENSG00000125503.12	PPP1R12C	13.7332	13.7588	14.8523	22.2045	23.5947	29.5896	ENSG00000125503.12	PPP1R12C	chr19:55090912-55117559	MB231_CTRL	MB231_W2	OK	14.1148	25.1296	0.832183	3.69466	5e-05	0.000503098	yes
ENSG00000125505.16	MBOAT7	176.648	210.014	171.575	114.249	133.72	121.152	ENSG00000125505.16	MBOAT7	chr19:54173411-54189882	MB231_CTRL	MB231_W2	OK	186.079	123.04	-0.596785	-3.08559	5e-05	0.000503098	yes
ENSG00000125534.9	PPDPF	405.759	437.372	385.013	317.422	330.64	304.827	ENSG00000125534.9	PPDPF	chr20:63520723-63522206	MB231_CTRL	MB231_W2	OK	409.381	317.63	-0.366099	-2.26496	0.0001	0.000939965	yes
ENSG00000125648.14	SLC25A23	29.1169	35.0318	30.9906	22.1333	20.9679	16.2997	ENSG00000125648.14	SLC25A23	chr19:6436078-6482557	MB231_CTRL	MB231_W2	OK	31.7131	19.8003	-0.679556	-2.40289	5e-05	0.000503098	yes
ENSG00000125651.13	GTF2F1	30.4676	32.7377	30.6102	19.1692	21.3916	24.2733	ENSG00000125651.13	GTF2F1	chr19:6379568-6412404	MB231_CTRL	MB231_W2	OK	31.2718	21.6114	-0.533073	-1.73652	0.00225	0.0134005	yes
ENSG00000125656.8	CLPP	42.6953	53.7532	36.9329	25.1056	32.9419	34.1696	ENSG00000125656.8	CLPP	chr19:6343760-6368908	MB231_CTRL	MB231_W2	OK	44.4605	30.739	-0.532451	-1.9393	0.0009	0.00624357	yes
ENSG00000125691.12	RPL23	585.183	621.306	605.993	723.461	721.575	784.023	ENSG00000125691.12	RPL23	chr17:38847864-38853843	MB231_CTRL	MB231_W2	OK	604.161	743.02	0.298468	1.71115	0.0029	0.0164807	yes
ENSG00000125741.4	OPA3	6.1879	8.45943	7.56803	3.88932	4.01399	4.78927	ENSG00000125741.4	OPA3	chr19:45527426-45602212	MB231_CTRL	MB231_W2	OK	7.40512	4.23086	-0.807572	-1.96815	0.00085	0.00593698	yes
ENSG00000125743.10	SNRPD2	77.4226	82.7289	77.2085	110.631	113.132	99.8751	ENSG00000125743.10	SNRPD2	chr19:45687453-45703989	MB231_CTRL	MB231_W2	OK	79.12	107.879	0.447304	1.76936	0.00505	0.0259515	yes
ENSG00000125814.17	NAPB	3.55667	2.45489	3.14944	7.19218	8.02009	8.89633	ENSG00000125814.17	NAPB	chr20:23374518-23421519	MB231_CTRL	MB231_W2	OK	3.05366	8.0362	1.39597	2.99326	5e-05	0.000503098	yes
ENSG00000125817.7	CENPB	19.6445	22.7812	27.2628	16.3649	18.1075	22.7812	ENSG00000125817.7	CENPB	chr20:3783850-3786690	MB231_CTRL	MB231_W2	OK	23.2295	19.0845	-0.283556	-1.84713	0.0018	0.0111376	yes
ENSG00000125818.17	PSMF1	45.4027	53.1873	55.8269	21.975	34.1102	28.9039	ENSG00000125818.17	PSMF1	chr20:1113262-1208274	MB231_CTRL	MB231_W2	OK	51.4723	28.3297	-0.861482	-2.0427	0.00045	0.00346901	yes
ENSG00000125821.11	DTD1	26.8439	28.2655	28.0566	18.222	20.363	19.4556	ENSG00000125821.11	DTD1	chr20:18567346-18763917	MB231_CTRL	MB231_W2	OK	27.722	19.3469	-0.518932	-2.57643	5e-05	0.000503098	yes
ENSG00000125826.19	RBCK1	25.0602	28.2436	26.3202	31.7226	46.4673	44.0653	ENSG00000125826.19	RBCK1	chr20:407497-430966	MB231_CTRL	MB231_W2	OK	26.5413	40.7517	0.618621	2.8215	5e-05	0.000503098	yes
ENSG00000125834.12	STK35	15.8287	16.3281	16.2541	9.68082	13.2186	13.2594	ENSG00000125834.12	STK35	chr20:2101610-2177038	MB231_CTRL	MB231_W2	OK	16.137	12.053	-0.420982	-2.48749	5e-05	0.000503098	yes
ENSG00000125844.15	RRBP1	87.3548	106.914	104.73	53.6325	61.0455	58.5149	ENSG00000125844.15	RRBP1	chr20:17613677-17682295	MB231_CTRL	MB231_W2	OK	99.6662	57.731	-0.787758	-3.85928	5e-05	0.000503098	yes
ENSG00000125863.17	MKKS	43.9845	37.5325	40.9876	49.2736	53.1968	54.4215	ENSG00000125863.17	MKKS	chr20:10401008-10434222	MB231_CTRL	MB231_W2	OK	40.8348	52.2973	0.356936	1.5693	0.00645	0.0314181	yes
ENSG00000125872.7	LRRN4	2.26131	2.16656	2.57566	0.851162	1.51377	1.20142	ENSG00000125872.7	LRRN4	chr20:6040777-6054049	MB231_CTRL	MB231_W2	OK	2.33451	1.18878	-0.973635	-1.81038	0.0033	0.0182709	yes
ENSG00000125885.13	MCM8	7.78791	9.55914	8.67315	13.5431	14.072	15.3909	ENSG00000125885.13	MCM8	chr20:5950651-6005821	MB231_CTRL	MB231_W2	OK	8.6734	14.3354	0.724908	3.79863	5e-05	0.000503098	yes
ENSG00000125901.5	MRPS26	40.5327	42.339	37.4885	21.6245	33.619	24.2115	ENSG00000125901.5	MRPS26	chr20:3045944-3048254	MB231_CTRL	MB231_W2	OK	40.1201	26.485	-0.599146	-3.10546	5e-05	0.000503098	yes
ENSG00000125944.18	HNRNPR	97.3361	96.5674	97.1	56.3412	60.4893	68.3136	ENSG00000125944.18	HNRNPR	chr1:23303770-23344336	MB231_CTRL	MB231_W2	OK	97.0012	61.7147	-0.652387	-2.50471	5e-05	0.000503098	yes
ENSG00000125967.16	NECAB3	10.3733	12.2999	9.01218	26.1857	23.9382	41.2067	ENSG00000125967.16	NECAB3	chr20:33657086-33674463	MB231_CTRL	MB231_W2	OK	10.5618	30.4435	1.52728	3.3569	5e-05	0.000503098	yes
ENSG00000125968.8	ID1	23.6072	24.7686	18.9094	31.4433	44.2043	40.4894	ENSG00000125968.8	ID1	chr20:31605282-31606515	MB231_CTRL	MB231_W2	OK	22.4284	38.7123	0.787466	3.50663	5e-05	0.000503098	yes
ENSG00000125971.16	DYNLRB1	80.1358	79.3499	74.2	62.384	57.8105	69.3171	ENSG00000125971.16	DYNLRB1	chr20:34516408-34540958	MB231_CTRL	MB231_W2	OK	77.8952	63.1705	-0.302283	-1.58075	0.0054	0.0273857	yes
ENSG00000126062.3	TMEM115	24.9787	25.7639	25.9768	14.4948	19.1523	20.9177	ENSG00000126062.3	TMEM115	chr3:50347329-50504244	MB231_CTRL	MB231_W2	OK	25.5731	18.1883	-0.491617	-2.10042	0.0003	0.00245627	yes
ENSG00000126067.11	PSMB2	103.888	119.184	111.775	71.2507	82.8603	66.1582	ENSG00000126067.11	PSMB2	chr1:35599543-35641844	MB231_CTRL	MB231_W2	OK	111.616	73.4231	-0.604233	-2.99863	5e-05	0.000503098	yes
ENSG00000126107.14	HECTD3	22.0849	23.3145	22.6513	10.4203	14.4202	17.8014	ENSG00000126107.14	HECTD3	chr1:45002539-45011329	MB231_CTRL	MB231_W2	OK	22.6836	14.214	-0.67434	-2.16022	0.0006	0.00442867	yes
ENSG00000126247.10	CAPNS1	297.887	300.691	294.225	184.498	172.354	206.84	ENSG00000126247.10	CAPNS1	chr19:36139574-36150353	MB231_CTRL	MB231_W2	OK	297.601	187.897	-0.663436	-3.79644	5e-05	0.000503098	yes
ENSG00000126432.13	PRDX5	87.904	101.22	98.6984	37.3029	42.5916	51.5333	ENSG00000126432.13	PRDX5	chr11:64318087-64321811	MB231_CTRL	MB231_W2	OK	95.9407	43.8093	-1.13091	-6.01097	5e-05	0.000503098	yes
ENSG00000126458.3	RRAS	32.3813	38.3805	31.0197	20.4931	22.8698	25.3644	ENSG00000126458.3	RRAS	chr19:49635291-49640201	MB231_CTRL	MB231_W2	OK	33.9272	22.9091	-0.56652	-2.60617	5e-05	0.000503098	yes
ENSG00000126461.14	SCAF1	23.884	29.1388	31.8223	17.2415	22.9554	17.975	ENSG00000126461.14	SCAF1	chr19:49642124-49658642	MB231_CTRL	MB231_W2	OK	28.2817	19.3907	-0.544506	-1.67767	0.0037	0.0200658	yes
ENSG00000126524.9	SBDS	64.3217	63.9308	70.7833	53.7844	54.5861	48.4539	ENSG00000126524.9	SBDS	chr7:66987676-67239519	MB231_CTRL	MB231_W2	OK	66.3453	52.2748	-0.343877	-1.8592	0.00105	0.00712483	yes
ENSG00000126698.10	DNAJC8	40.6098	43.4436	52.2473	33.1599	31.5135	38.4491	ENSG00000126698.10	DNAJC8	chr1:28199455-28233025	MB231_CTRL	MB231_W2	OK	45.4336	34.3742	-0.402435	-1.54797	0.01125	0.0488171	yes
ENSG00000126746.17	ZNF384	14.2769	13.0635	13.006	19.8509	25.4523	18.6436	ENSG00000126746.17	ZNF384	chr12:6663259-6689572	MB231_CTRL	MB231_W2	OK	13.4488	21.3156	0.664429	1.9151	0.00045	0.00346901	yes
ENSG00000126767.17	ELK1	53.5343	53.4041	49.9457	34.4044	43.6532	35.1478	ENSG00000126767.17	ELK1	chrX:47635520-47650604	MB231_CTRL	MB231_W2	OK	52.2947	37.7351	-0.470756	-2.67744	5e-05	0.000503098	yes
ENSG00000126790.11	L3HYPDH	11.2913	11.7768	12.7478	54.2583	49.9107	63.6117	ENSG00000126790.11	L3HYPDH	chr14:59429021-59576831	MB231_CTRL	MB231_W2	OK	11.9386	55.9269	2.22791	5.22003	5e-05	0.000503098	yes
ENSG00000126821.7	SGPP1	30.2827	31.862	30.58	23.9419	24.0801	14.9409	ENSG00000126821.7	SGPP1	chr14:63684213-63728039	MB231_CTRL	MB231_W2	OK	30.9082	20.9876	-0.558452	-2.86821	5e-05	0.000503098	yes
ENSG00000126860.11	EVI2A	16.7091	19.7848	19.4398	32.3225	37.2049	38.2938	ENSG00000126860.11	EVI2A	chr17:31008496-31382116	MB231_CTRL	MB231_W2	OK	18.6446	35.9404	0.94685	4.01766	5e-05	0.000503098	yes
ENSG00000126870.15	WDR60	5.71397	4.65594	5.42184	6.09141	7.55496	8.89846	ENSG00000126870.15	WDR60	chr7:158856577-158956747	MB231_CTRL	MB231_W2	OK	5.26392	7.51495	0.513626	1.6253	0.0052	0.0265672	yes
ENSG00000126945.8	HNRNPH2	32.2868	34.5439	35.2971	25.3583	22.2123	28.4818	ENSG00000126945.8	HNRNPH2	chrX:101390823-101414133	MB231_CTRL	MB231_W2	OK	34.0426	25.3508	-0.42531	-1.66774	0.00765	0.0361061	yes
ENSG00000126953.5	TIMM8A	10.8617	12.2482	12.8909	16.8712	22.6323	22.0454	ENSG00000126953.5	TIMM8A	chrX:101345660-101349196	MB231_CTRL	MB231_W2	OK	12.0003	20.5163	0.773702	3.04261	5e-05	0.000503098	yes
ENSG00000127081.13	ZNF484	2.39636	2.86917	3.00621	3.65519	4.38949	3.79198	ENSG00000127081.13	ZNF484	chr9:92809387-92899608	MB231_CTRL	MB231_W2	OK	2.75725	3.94555	0.516998	1.91666	0.0006	0.00442867	yes
ENSG00000127129.9	EDN2	20.0902	18.8435	22.3705	1.83316	3.4727	2.98422	ENSG00000127129.9	EDN2	chr1:41478774-41484673	MB231_CTRL	MB231_W2	OK	20.4347	2.76336	-2.88653	-4.52603	5e-05	0.000503098	yes
ENSG00000127184.11	COX7C	1171.17	1109.79	1168.77	1310.06	1354.26	1494.29	ENSG00000127184.11	COX7C	chr5:86617903-86620962	MB231_CTRL	MB231_W2	OK	1149.91	1386.2	0.26962	1.49195	0.00835	0.0386389	yes
ENSG00000127337.6	YEATS4	17.1801	21.2779	21.0962	33.5452	43.7362	46.2901	ENSG00000127337.6	YEATS4	chr12:69359702-69390796	MB231_CTRL	MB231_W2	OK	19.8514	41.1905	1.05307	3.22324	5e-05	0.000503098	yes
ENSG00000127399.14	LRRC61	92.8228	89.2382	96.2949	40.6987	58.0811	51.9324	ENSG00000127399.14	LRRC61	chr7:150243915-150338150	MB231_CTRL	MB231_W2	OK	92.7853	50.2374	-0.885134	-3.83361	5e-05	0.000503098	yes
ENSG00000127415.12	IDUA	3.46642	2.99842	3.16975	7.10593	11.4662	9.75849	ENSG00000127415.12	IDUA	chr4:958886-1004506	MB231_CTRL	MB231_W2	OK	3.21153	9.44353	1.55606	1.74103	5e-05	0.000503098	yes
ENSG00000127418.14	FGFRL1	25.8157	31.5991	22.7672	17.1605	19.2634	21.3572	ENSG00000127418.14	FGFRL1	chr4:1009935-1026897	MB231_CTRL	MB231_W2	OK	26.7273	19.2604	-0.472678	-2.10294	0.00025	0.00209262	yes
ENSG00000127419.16	TMEM175	7.96974	8.32595	9.18892	12.0753	13.7074	18.4091	ENSG00000127419.16	TMEM175	chr4:932386-958656	MB231_CTRL	MB231_W2	OK	8.49487	14.7306	0.794153	1.30462	0.00135	0.00878859	yes
ENSG00000127463.13	EMC1	35.3709	36.0282	37.3317	23.6921	23.4376	22.0945	ENSG00000127463.13	EMC1	chr1:19210500-19260128	MB231_CTRL	MB231_W2	OK	36.2436	23.0747	-0.651412	-1.1469	0.00365	0.0198601	yes
ENSG00000127483.17	HP1BP3	72.37	86.7994	85.5304	152.952	141.784	192.858	ENSG00000127483.17	HP1BP3	chr1:20742660-20787323	MB231_CTRL	MB231_W2	OK	81.5666	162.531	0.994666	2.80329	5e-05	0.000503098	yes
ENSG00000127511.9	SIN3B	21.146	22.0153	18.8173	24.8876	29.6927	29.4694	ENSG00000127511.9	SIN3B	chr19:16829399-16880353	MB231_CTRL	MB231_W2	OK	20.6595	28.0166	0.439471	1.66143	0.0037	0.0200658	yes
ENSG00000127540.11	UQCR11	96.7767	101.795	97.364	157.952	143.536	169.258	ENSG00000127540.11	UQCR11	chr19:1573595-1605490	MB231_CTRL	MB231_W2	OK	98.6453	156.915	0.669663	1.77393	0.0041	0.0218807	yes
ENSG00000127586.16	CHTF18	8.59573	15.3424	9.48343	38.5113	51.2991	35.4204	ENSG00000127586.16	CHTF18	chr16:784973-800737	MB231_CTRL	MB231_W2	OK	11.1405	41.7436	1.90574	3.16731	5e-05	0.000503098	yes
ENSG00000127589.4	TUBBP1	4.06965	4.69263	4.35022	2.57683	2.42895	2.33903	ENSG00000127589.4	TUBBP1	chr8:30351872-30353518	MB231_CTRL	MB231_W2	OK	4.37083	2.44827	-0.836147	-1.81107	0.00285	0.0162772	yes
ENSG00000127837.9	AAMP	38.9486	35.861	40.8347	24.2245	24.8684	28.681	ENSG00000127837.9	AAMP	chr2:218264122-218270257	MB231_CTRL	MB231_W2	OK	38.5481	25.9246	-0.572337	-2.37506	5e-05	0.000503098	yes
ENSG00000127914.16	AKAP9	4.01946	4.79343	6.77341	10.7453	8.88999	8.73378	ENSG00000127914.16	AKAP9	chr7:91940866-92110673	MB231_CTRL	MB231_W2	OK	5.19543	9.45635	0.86404	1.86056	0.00025	0.00209262	yes
ENSG00000127920.5	GNG11	37.8345	38.5668	37.2102	40.9629	48.2539	47.9639	ENSG00000127920.5	GNG11	chr7:93921698-93928610	MB231_CTRL	MB231_W2	OK	37.8705	45.7269	0.271968	1.70982	0.0031	0.0173617	yes
ENSG00000127922.9	SHFM1	214.548	197.818	181.462	159.547	160.788	154.221	ENSG00000127922.9	SHFM1	chr7:96481625-96709891	MB231_CTRL	MB231_W2	OK	197.942	158.186	-0.323462	-1.5247	0.0066	0.0320046	yes
ENSG00000127957.16	PMS2P3	3.74258	2.52492	4.27549	5.85676	9.28189	8.37385	ENSG00000127957.16	PMS2P3	chr7:75493624-75528148	MB231_CTRL	MB231_W2	OK	3.51433	7.8375	1.15714	1.75947	0.00015	0.00134259	yes
ENSG00000127980.15	PEX1	5.08239	5.48773	6.18048	11.4596	12.4594	9.84251	ENSG00000127980.15	PEX1	chr7:92447452-92528531	MB231_CTRL	MB231_W2	OK	5.58353	11.2538	1.01116	1.55853	0.0006	0.00442867	yes
ENSG00000127989.13	MTERF1	5.68607	5.5209	4.8975	12.738	13.5382	10.3574	ENSG00000127989.13	MTERF1	chr7:91692007-91880720	MB231_CTRL	MB231_W2	OK	5.36816	12.2112	1.18571	2.22747	5e-05	0.000503098	yes
ENSG00000128000.15	ZNF780B	3.7096	4.79463	4.18918	9.97447	7.54717	8.80902	ENSG00000128000.15	ZNF780B	chr19:40028259-40094406	MB231_CTRL	MB231_W2	OK	4.23114	8.77689	1.05266	1.63405	0.002	0.0121525	yes
ENSG00000128159.11	TUBGCP6	3.11012	3.55642	3.02627	10.4599	13.2238	15.1253	ENSG00000128159.11	TUBGCP6	chr22:50217688-50244992	MB231_CTRL	MB231_W2	OK	3.23094	12.9363	2.0014	5.04328	5e-05	0.000503098	yes
ENSG00000128191.14	DGCR8	9.70214	6.69525	6.18554	14.9671	21.4957	19.1347	ENSG00000128191.14	DGCR8	chr22:20080231-20127357	MB231_CTRL	MB231_W2	OK	7.52764	18.5325	1.29979	1.34138	0.00195	0.0118792	yes
ENSG00000128245.14	YWHAH	136.094	148.415	142.178	92.6587	118.543	123.285	ENSG00000128245.14	YWHAH	chr22:31933520-31957603	MB231_CTRL	MB231_W2	OK	142.229	111.496	-0.351227	-1.7004	0.00355	0.0194305	yes
ENSG00000128272.14	ATF4	75.6497	81.1533	83.4991	118.174	142.493	130.132	ENSG00000128272.14	ATF4	chr22:39519694-39522685	MB231_CTRL	MB231_W2	OK	80.1007	130.267	0.701579	4.35896	5e-05	0.000503098	yes
ENSG00000128283.6	CDC42EP1	45.3177	49.2757	43.9015	32.1106	39.8979	38.8645	ENSG00000128283.6	CDC42EP1	chr22:37560446-37569405	MB231_CTRL	MB231_W2	OK	46.165	36.9577	-0.320925	-1.7693	0.0023	0.0136382	yes
ENSG00000128309.16	MPST	26.3939	28.8544	25.0391	17.3831	18.0628	21.1202	ENSG00000128309.16	MPST	chr22:37010858-37029822	MB231_CTRL	MB231_W2	OK	26.7625	18.8553	-0.505238	-1.59051	0.0068	0.032777	yes
ENSG00000128340.14	RAC2	105.842	112.506	99.2721	65.2663	76.616	77.8296	ENSG00000128340.14	RAC2	chr22:37225260-37244448	MB231_CTRL	MB231_W2	OK	105.873	73.2373	-0.531689	-3.13086	5e-05	0.000503098	yes
ENSG00000128342.4	LIF	10.9856	15.0277	11.7078	19.872	26.2683	19.532	ENSG00000128342.4	LIF	chr22:30239193-30246998	MB231_CTRL	MB231_W2	OK	12.5737	21.8908	0.799913	2.62547	5e-05	0.000503098	yes
ENSG00000128408.8	RIBC2	0.523864	0.981343	0.735593	2.37423	2.06091	3.25779	ENSG00000128408.8	RIBC2	chr22:45413690-45432496	MB231_CTRL	MB231_W2	OK	0.746933	2.56431	1.77952	2.12475	0.0001	0.000939965	yes
ENSG00000128563.13	PRKRIP1	5.41603	5.4169	6.14124	9.29274	9.01514	10.3526	ENSG00000128563.13	PRKRIP1	chr7:102363871-102426676	MB231_CTRL	MB231_W2	OK	5.65806	9.5535	0.755723	2.38384	5e-05	0.000503098	yes
ENSG00000128567.16	PODXL	80.791	94.0872	89.1827	51.4113	54.3526	55.0883	ENSG00000128567.16	PODXL	chr7:131500261-131558217	MB231_CTRL	MB231_W2	OK	88.0203	53.6174	-0.715134	-3.48828	5e-05	0.000503098	yes
ENSG00000128578.9	STRIP2	5.56996	5.25954	4.77264	9.69798	11.6669	15.2572	ENSG00000128578.9	STRIP2	chr7:129434432-129488399	MB231_CTRL	MB231_W2	OK	5.20071	12.2074	1.23097	4.52391	5e-05	0.000503098	yes
ENSG00000128591.15	FLNC	47.3099	47.5489	44.8407	16.9053	22.2368	19.5434	ENSG00000128591.15	FLNC	chr7:128830376-128910719	MB231_CTRL	MB231_W2	OK	46.5665	19.5618	-1.25125	-5.59306	5e-05	0.000503098	yes
ENSG00000128595.16	CALU	150.357	172.063	175.41	108.175	108.704	105.924	ENSG00000128595.16	CALU	chr7:128739291-128771807	MB231_CTRL	MB231_W2	OK	165.943	107.601	-0.625	-3.74899	5e-05	0.000503098	yes
ENSG00000128596.16	CCDC136	0.593237	0.9764	0.533707	2.11185	3.0497	8.48242	ENSG00000128596.16	CCDC136	chr7:128790756-128822132	MB231_CTRL	MB231_W2	OK	0.701115	4.54799	2.69751	1.21632	5e-05	0.000503098	yes
ENSG00000128607.13	KLHDC10	9.43522	10.2284	11.9839	7.55463	6.77239	4.98731	ENSG00000128607.13	KLHDC10	chr7:130070509-130135720	MB231_CTRL	MB231_W2	OK	10.5492	6.43811	-0.712419	-2.21239	5e-05	0.000503098	yes
ENSG00000128641.18	MYO1B	33.3006	38.2867	37.9805	19.7686	29.4935	20.5658	ENSG00000128641.18	MYO1B	chr2:191229164-191425389	MB231_CTRL	MB231_W2	OK	36.5226	23.276	-0.649949	-1.8221	0.0025	0.0146112	yes
ENSG00000128833.12	MYO5C	1.36374	1.45799	1.50851	4.39689	3.29609	4.78467	ENSG00000128833.12	MYO5C	chr15:52115104-52295798	MB231_CTRL	MB231_W2	OK	1.44341	4.15922	1.52683	1.58647	0.0012	0.00797254	yes
ENSG00000128928.8	IVD	11.9225	16.1278	11.0924	16.7607	19.3055	21.8135	ENSG00000128928.8	IVD	chr15:40405794-40435947	MB231_CTRL	MB231_W2	OK	13.0476	19.2932	0.564316	1.43897	0.00585	0.0291483	yes
ENSG00000128944.13	KNSTRN	24.3958	27.411	25.268	34.3494	36.9341	38.5255	ENSG00000128944.13	KNSTRN	chr15:40382720-40394246	MB231_CTRL	MB231_W2	OK	25.6916	36.603	0.510664	2.1046	0.0001	0.000939965	yes
ENSG00000128951.13	DUT	50.3177	47.3966	45.1678	50.7822	61.4568	71.4664	ENSG00000128951.13	DUT	chr15:48312352-48343373	MB231_CTRL	MB231_W2	OK	47.6274	61.2352	0.36257	1.38297	0.01095	0.0478279	yes
ENSG00000128989.10	ARPP19	70.2818	71.8553	75.8805	56.572	56.7761	64.4933	ENSG00000128989.10	ARPP19	chr15:52547044-52569883	MB231_CTRL	MB231_W2	OK	72.6725	59.2805	-0.293853	-1.40082	0.0078	0.0366223	yes
ENSG00000129003.15	VPS13C	8.05698	12.6352	10.9829	26.6048	15.0678	20.1535	ENSG00000129003.15	VPS13C	chr15:61852388-62060473	MB231_CTRL	MB231_W2	OK	10.5584	20.6087	0.964866	1.56354	0.00475	0.0247357	yes
ENSG00000129083.12	COPB1	102.126	104.242	116.454	87.3819	82.571	70.973	ENSG00000129083.12	COPB1	chr11:14443439-14643635	MB231_CTRL	MB231_W2	OK	107.607	80.3086	-0.422151	-1.48326	0.0099	0.0441799	yes
ENSG00000129084.17	PSMA1	82.6003	88.6595	84.3652	121.67	125.483	137.783	ENSG00000129084.17	PSMA1	chr11:14443439-14643635	MB231_CTRL	MB231_W2	OK	85.2083	128.312	0.590594	1.55487	0.0054	0.0273857	yes
ENSG00000129103.17	SUMF2	60.8456	66.1103	64.8672	82.9649	82.7355	102.761	ENSG00000129103.17	SUMF2	chr7:56064001-56092996	MB231_CTRL	MB231_W2	OK	63.941	89.4872	0.484939	2.1483	0.00065	0.00473038	yes
ENSG00000129116.17	PALLD	37.0323	38.9321	41.2131	30.4724	31.1168	27.8631	ENSG00000129116.17	PALLD	chr4:168356734-169010275	MB231_CTRL	MB231_W2	OK	39.0592	29.8174	-0.389505	-1.57188	0.00485	0.0251526	yes
ENSG00000129128.12	SPCS3	49.3023	56.3621	52.281	77.3561	75.7692	67.1691	ENSG00000129128.12	SPCS3	chr4:176308267-176332245	MB231_CTRL	MB231_W2	OK	52.6485	73.4315	0.480007	2.55891	5e-05	0.000503098	yes
ENSG00000129158.10	SERGEF	8.35708	7.06249	10.0599	24.6599	8.83375	16.1052	ENSG00000129158.10	SERGEF	chr11:17788047-18042426	MB231_CTRL	MB231_W2	OK	8.49317	16.5329	0.960968	1.35099	0.0012	0.00797254	yes
ENSG00000129173.12	E2F8	10.5539	10.2904	9.15581	13.5272	16.4987	13.8875	ENSG00000129173.12	E2F8	chr11:19182029-19281426	MB231_CTRL	MB231_W2	OK	10	14.6378	0.549697	2.02609	0.0004	0.00314441	yes
ENSG00000129219.13	PLD2	4.79994	4.09221	3.15332	11.116	5.98216	9.73058	ENSG00000129219.13	PLD2	chr17:4807095-4823434	MB231_CTRL	MB231_W2	OK	4.01516	8.94292	1.15529	1.19192	0.0028	0.01604	yes
ENSG00000129292.20	PHF20L1	18.056	19.9505	16.3274	25.5444	34.7896	29.9096	ENSG00000129292.20	PHF20L1	chr8:132775357-132848807	MB231_CTRL	MB231_W2	OK	18.1113	30.0812	0.731969	1.55799	0.0058	0.0289678	yes
ENSG00000129295.8	LRRC6	0.605949	0.417897	0.499118	1.66695	3.42218	1.28526	ENSG00000129295.8	LRRC6	chr8:132571952-132675617	MB231_CTRL	MB231_W2	OK	0.507655	2.1248	2.06541	0.617407	0.0041	0.0218807	yes
ENSG00000129347.19	KRI1	13.3536	16.0377	16.6499	20.4201	17.4659	22.1538	ENSG00000129347.19	KRI1	chr19:10543894-10566037	MB231_CTRL	MB231_W2	OK	15.3471	20.0133	0.382994	1.4202	0.00965	0.0433351	yes
ENSG00000129354.11	AP1M2	18.1016	20.8629	22.7591	37.0838	31.2731	27.7793	ENSG00000129354.11	AP1M2	chr19:10572670-10587315	MB231_CTRL	MB231_W2	OK	20.5745	32.0454	0.639258	1.59299	0.0032	0.0178059	yes
ENSG00000129460.15	NGDN	16.9292	21.3653	22.6697	26.692	29.8023	28.6624	ENSG00000129460.15	NGDN	chr14:23469687-23509862	MB231_CTRL	MB231_W2	OK	20.3214	28.3856	0.482157	1.63501	0.00335	0.018518	yes
ENSG00000129474.15	AJUBA	70.1024	72.1796	71.7628	80.1781	94.4656	96.327	ENSG00000129474.15	AJUBA	chr14:22929608-22982642	MB231_CTRL	MB231_W2	OK	71.3483	90.3236	0.340224	1.60495	0.00525	0.0267865	yes
ENSG00000129518.8	EAPP	17.2917	17.3377	19.5936	22.4133	33.5542	30.5306	ENSG00000129518.8	EAPP	chr14:34515928-34539711	MB231_CTRL	MB231_W2	OK	18.0743	28.8327	0.673768	2.62257	5e-05	0.000503098	yes
ENSG00000129534.13	MIS18BP1	18.3798	20.149	20.6728	37.7714	24.0148	28.6155	ENSG00000129534.13	MIS18BP1	chr14:45203189-45253540	MB231_CTRL	MB231_W2	OK	19.7339	30.1339	0.610716	1.5924	0.0037	0.0200658	yes
ENSG00000129559.12	NEDD8	87.1544	95.1854	96.5252	144.874	145.541	174.514	ENSG00000129559.12	NEDD8	chr14:24171852-24239242	MB231_CTRL	MB231_W2	OK	92.955	154.976	0.737443	2.80337	5e-05	0.000503098	yes
ENSG00000129566.12	TEP1	3.41269	3.31972	2.60452	8.21314	9.2185	6.16382	ENSG00000129566.12	TEP1	chr14:20365666-20413429	MB231_CTRL	MB231_W2	OK	3.11231	7.86515	1.33749	1.80198	0.0005	0.00379645	yes
ENSG00000129757.12	CDKN1C	8.95161	9.79077	9.60309	4.02978	3.81584	5.3074	ENSG00000129757.12	CDKN1C	chr11:2883212-2885881	MB231_CTRL	MB231_W2	OK	9.44849	4.38434	-1.10772	-2.07368	0.00065	0.00473038	yes
ENSG00000129810.14	SGO1	16.2968	16.295	15.6839	20.0988	24.4891	22.2487	ENSG00000129810.14	SGO1	chr3:20160592-21226305	MB231_CTRL	MB231_W2	OK	16.0919	22.2789	0.469343	2.31116	0.0001	0.000939965	yes
ENSG00000129911.8	KLF16	42.5334	38.8061	41.9256	24.7286	34.7854	26.8499	ENSG00000129911.8	KLF16	chr19:1852381-1863568	MB231_CTRL	MB231_W2	OK	41.0884	28.788	-0.513264	-2.04618	0.0004	0.00314441	yes
ENSG00000129925.10	TMEM8A	43.1073	35.1202	38.2282	21.1558	26.9125	34.3656	ENSG00000129925.10	TMEM8A	chr16:370772-392960	MB231_CTRL	MB231_W2	OK	38.8185	27.478	-0.498471	-1.68815	0.00315	0.0175845	yes
ENSG00000129933.20	MAU2	12.8832	10.6849	9.52263	19.6476	25.0822	27.0355	ENSG00000129933.20	MAU2	chr19:19276017-19358755	MB231_CTRL	MB231_W2	OK	11.0302	23.9217	1.11686	2.62426	5e-05	0.000503098	yes
ENSG00000130021.13	PUDP	29.9178	30.3033	28.5375	13.9488	20.5413	18.2607	ENSG00000130021.13	PUDP	chrX:7048919-7148190	MB231_CTRL	MB231_W2	OK	29.5862	17.5836	-0.750693	-3.23223	5e-05	0.000503098	yes
ENSG00000130023.15	ERMARD	10.9413	10.3044	12.187	24.0163	22.0641	25.6731	ENSG00000130023.15	ERMARD	chr6:169751621-169781584	MB231_CTRL	MB231_W2	OK	11.1442	23.9179	1.10179	2.60232	5e-05	0.000503098	yes
ENSG00000130066.16	SAT1	22.1041	29.5622	30.3256	58.9321	67.8661	63.7706	ENSG00000130066.16	SAT1	chrX:23783172-23786226	MB231_CTRL	MB231_W2	OK	27.3306	63.5229	1.21676	5.72292	5e-05	0.000503098	yes
ENSG00000130119.15	GNL3L	9.72473	10.5689	12.7658	7.79987	6.71719	8.17016	ENSG00000130119.15	GNL3L	chrX:54530210-54561071	MB231_CTRL	MB231_W2	OK	11.0198	7.56241	-0.543185	-2.59044	5e-05	0.000503098	yes
ENSG00000130158.13	DOCK6	1.62725	1.82733	2.57487	9.64829	4.78231	4.64607	ENSG00000130158.13	DOCK6	chr19:11199294-11262481	MB231_CTRL	MB231_W2	OK	2.00982	6.35889	1.66171	1.08609	5e-05	0.000503098	yes
ENSG00000130159.13	ECSIT	21.0384	26.4898	23.8199	13.6556	14.1878	17.1322	ENSG00000130159.13	ECSIT	chr19:11451325-11529174	MB231_CTRL	MB231_W2	OK	23.7827	14.9919	-0.665736	-1.66504	0.0013	0.00851582	yes
ENSG00000130164.12	LDLR	53.9166	69.3325	57.3836	45.1189	45.8353	42.1355	ENSG00000130164.12	LDLR	chr19:11089361-11155808	MB231_CTRL	MB231_W2	OK	60.2109	44.3632	-0.44066	-1.36952	0.0097	0.0435183	yes
ENSG00000130165.10	ELOF1	40.3509	42.2357	38.6906	27.3954	34.9076	31.2077	ENSG00000130165.10	ELOF1	chr19:11551146-11559236	MB231_CTRL	MB231_W2	OK	40.4257	31.1702	-0.375104	-1.5691	0.00585	0.0291483	yes
ENSG00000130177.14	CDC16	14.1969	16.0508	15.1679	23.2576	21.5797	23.3306	ENSG00000130177.14	CDC16	chr13:114234886-114272723	MB231_CTRL	MB231_W2	OK	15.1385	22.7226	0.585905	2.28034	0.0002	0.00172918	yes
ENSG00000130202.9	NECTIN2	41.2617	44.6713	39.3257	23.6946	34.9445	29.2378	ENSG00000130202.9	NECTIN2	chr19:44846174-44903689	MB231_CTRL	MB231_W2	OK	41.7529	29.2923	-0.511356	-1.81186	0.0019	0.0116365	yes
ENSG00000130208.9	APOC1	0.687915	1.29967	1.58059	3.29642	7.3651	3.04384	ENSG00000130208.9	APOC1	chr19:44905753-44919349	MB231_CTRL	MB231_W2	OK	1.18939	4.56846	1.94148	0.695591	0.0023	0.0136382	yes
ENSG00000130270.16	ATP8B3	5.04671	7.34008	6.57092	11.9873	15.1573	16.9438	ENSG00000130270.16	ATP8B3	chr19:1782074-1812276	MB231_CTRL	MB231_W2	OK	6.31923	14.6961	1.21762	3.99324	5e-05	0.000503098	yes
ENSG00000130299.16	GTPBP3	11.7603	12.6953	13.8675	26.9812	21.9507	26.6244	ENSG00000130299.16	GTPBP3	chr19:17334919-17342735	MB231_CTRL	MB231_W2	OK	12.7743	25.1854	0.979341	2.14289	5e-05	0.000503098	yes
ENSG00000130309.10	COLGALT1	87.9099	96.0627	89.0762	57.1184	70.1553	61.9879	ENSG00000130309.10	COLGALT1	chr19:17555593-17583162	MB231_CTRL	MB231_W2	OK	91.0163	63.0872	-0.528777	-2.44371	5e-05	0.000503098	yes
ENSG00000130340.15	SNX9	10.56	13.9492	12.1212	6.40967	8.62197	6.70062	ENSG00000130340.15	SNX9	chr6:157700386-157945077	MB231_CTRL	MB231_W2	OK	12.2101	7.24409	-0.753202	-3.38167	5e-05	0.000503098	yes
ENSG00000130402.11	ACTN4	471.972	518.836	527.313	283.669	365.133	388.207	ENSG00000130402.11	ACTN4	chr19:38647648-38769904	MB231_CTRL	MB231_W2	OK	506.04	345.67	-0.549858	-1.79148	0.0022	0.0131607	yes
ENSG00000130414.11	NDUFA10	39.4387	38.7952	40.5445	23.8755	29.3091	26.9935	ENSG00000130414.11	NDUFA10	chr2:239892449-240025402	MB231_CTRL	MB231_W2	OK	39.5928	26.726	-0.566993	-2.52033	5e-05	0.000503098	yes
ENSG00000130449.5	ZSWIM6	12.7959	13.8155	14.3435	9.36027	9.63048	10.2023	ENSG00000130449.5	ZSWIM6	chr5:61332272-61546170	MB231_CTRL	MB231_W2	OK	13.6516	9.73102	-0.488409	-2.65806	5e-05	0.000503098	yes
ENSG00000130508.10	PXDN	92.933	97.4506	90.9199	66.1253	62.0766	60.3954	ENSG00000130508.10	PXDN	chr2:1631886-1744852	MB231_CTRL	MB231_W2	OK	93.7678	62.8658	-0.576819	-1.73499	0.0021	0.0126444	yes
ENSG00000130511.15	SSBP4	15.1137	10.6513	17.8689	24.0806	24.9491	19.0696	ENSG00000130511.15	SSBP4	chr19:18418863-18438301	MB231_CTRL	MB231_W2	OK	14.5446	22.6998	0.642191	1.37654	0.0044	0.0231972	yes
ENSG00000130513.6	GDF15	1.45122	1.94624	1.05806	5.72201	2.86666	4.83232	ENSG00000130513.6	GDF15	chr19:18374730-18389176	MB231_CTRL	MB231_W2	OK	1.48517	4.47366	1.59083	1.3149	0.00385	0.0207484	yes
ENSG00000130517.13	PGPEP1	9.39634	10.0134	8.96912	9.67054	34.1091	26.4311	ENSG00000130517.13	PGPEP1	chr19:18340586-18369950	MB231_CTRL	MB231_W2	OK	9.45964	23.4036	1.30687	1.88388	0.0053	0.026998	yes
ENSG00000130522.5	JUND	143.935	126.952	120.233	72.163	78.7709	95.6865	ENSG00000130522.5	JUND	chr19:18279759-18281622	MB231_CTRL	MB231_W2	OK	130.374	82.2068	-0.665322	-3.2587	5e-05	0.000503098	yes
ENSG00000130544.11	ZNF557	2.00335	2.77538	2.17836	4.71476	3.6308	4.30602	ENSG00000130544.11	ZNF557	chr19:7069443-7087968	MB231_CTRL	MB231_W2	OK	2.31903	4.21719	0.86276	2.60138	5e-05	0.000503098	yes
ENSG00000130584.10	ZBTB46	0.930631	0.592436	0.325033	0.922273	2.56747	3.18077	ENSG00000130584.10	ZBTB46	chr20:63743665-63831244	MB231_CTRL	MB231_W2	OK	0.616033	2.22351	1.85176	1.13838	0.0031	0.0173617	yes
ENSG00000130638.15	ATXN10	58.1689	51.4204	51.9661	38.8007	38.6449	40.0042	ENSG00000130638.15	ATXN10	chr22:45657018-45845307	MB231_CTRL	MB231_W2	OK	53.8518	39.1499	-0.459985	-1.47914	0.00895	0.0407919	yes
ENSG00000130669.17	PAK4	25.0122	27.4396	23.55	17.3558	18.6269	18.4989	ENSG00000130669.17	PAK4	chr19:39125769-39182816	MB231_CTRL	MB231_W2	OK	25.3339	18.1605	-0.480267	-1.79677	0.00135	0.00878859	yes
ENSG00000130695.13	CEP85	7.40589	9.55345	8.65258	12.6116	13.6317	20.9084	ENSG00000130695.13	CEP85	chr1:26234152-26279038	MB231_CTRL	MB231_W2	OK	8.53731	15.7173	0.880496	2.46635	5e-05	0.000503098	yes
ENSG00000130702.14	LAMA5	47.2938	39.1376	47.4674	79.9979	94.8346	110.879	ENSG00000130702.14	LAMA5	chr20:62302092-62367312	MB231_CTRL	MB231_W2	OK	44.6329	95.2372	1.09342	2.25453	5e-05	0.000503098	yes
ENSG00000130706.12	ADRM1	114.876	111.241	110.399	67.5238	79.4576	84.0977	ENSG00000130706.12	ADRM1	chr20:62302092-62367312	MB231_CTRL	MB231_W2	OK	112.172	77.0263	-0.542286	-1.90195	0.00185	0.0114022	yes
ENSG00000130725.7	UBE2M	63.7516	72.4325	66.2492	39.7994	59.505	58.5167	ENSG00000130725.7	UBE2M	chr19:58555711-58558960	MB231_CTRL	MB231_W2	OK	67.4777	52.607	-0.359156	-1.96787	0.0009	0.00624357	yes
ENSG00000130758.7	MAP3K10	3.4995	3.93293	2.78584	8.50581	5.58123	7.42496	ENSG00000130758.7	MAP3K10	chr19:40191743-40215575	MB231_CTRL	MB231_W2	OK	3.40609	7.17067	1.07399	1.72069	0.0002	0.00172918	yes
ENSG00000130764.9	LRRC47	14.988	16.669	18.6872	8.88867	11.6441	15.3097	ENSG00000130764.9	LRRC47	chr1:3778557-3796504	MB231_CTRL	MB231_W2	OK	16.7814	11.9475	-0.490155	-1.67854	0.0065	0.0316088	yes
ENSG00000130844.16	ZNF331	4.36196	4.78938	4.84453	16.8949	21.5569	21.6871	ENSG00000130844.16	ZNF331	chr19:53520980-53580269	MB231_CTRL	MB231_W2	OK	4.66529	20.0463	2.1033	4.13054	5e-05	0.000503098	yes
ENSG00000130939.18	UBE4B	18.1737	22.2139	23.205	14.6151	14.834	13.4781	ENSG00000130939.18	UBE4B	chr1:10032831-10181239	MB231_CTRL	MB231_W2	OK	21.1975	14.3091	-0.566965	-1.90719	0.00045	0.00346901	yes
ENSG00000130962.17	PRRG1	11.3041	11.401	11.0027	5.81967	6.4171	6.64124	ENSG00000130962.17	PRRG1	chrX:37349274-38688920	MB231_CTRL	MB231_W2	OK	11.2359	6.29267	-0.836374	-1.96175	0.0005	0.00379645	yes
ENSG00000130985.16	UBA1	88.2461	93.2967	94.5463	42.7826	54.0981	49.5684	ENSG00000130985.16	UBA1	chrX:47190860-47215128	MB231_CTRL	MB231_W2	OK	92.0297	48.8164	-0.914735	-5.11766	5e-05	0.000503098	yes
ENSG00000131013.3	PPIL4	10.0422	11.2969	11.8815	9.07939	7.55484	7.96709	ENSG00000131013.3	PPIL4	chr6:149504732-149546038	MB231_CTRL	MB231_W2	OK	11.0735	8.20044	-0.433341	-2.22087	0.00015	0.00134259	yes
ENSG00000131019.10	ULBP3	3.98451	5.37227	5.41277	2.08688	2.74302	2.62128	ENSG00000131019.10	ULBP3	chr6:150063149-150069095	MB231_CTRL	MB231_W2	OK	4.92318	2.48373	-0.987085	-1.80233	0.00395	0.0212179	yes
ENSG00000131043.11	AAR2	18.4649	18.2539	17.2364	13.8848	14.0523	12.2629	ENSG00000131043.11	AAR2	chr20:36236458-36270918	MB231_CTRL	MB231_W2	OK	17.9851	13.4	-0.424568	-2.16869	0.00015	0.00134259	yes
ENSG00000131051.21	RBM39	98.9863	113.969	111.053	219.41	253.092	273.824	ENSG00000131051.21	RBM39	chr20:35703608-35742312	MB231_CTRL	MB231_W2	OK	108.003	248.775	1.20377	4.18862	5e-05	0.000503098	yes
ENSG00000131127.13	ZNF141	3.65059	3.94328	4.5512	13.7586	13.931	11.4348	ENSG00000131127.13	ZNF141	chr4:337813-384864	MB231_CTRL	MB231_W2	OK	4.04836	13.0415	1.6877	4.60457	5e-05	0.000503098	yes
ENSG00000131153.8	GINS2	8.29968	9.56733	11.3147	12.618	16.3446	16.248	ENSG00000131153.8	GINS2	chr16:85169524-85690073	MB231_CTRL	MB231_W2	OK	9.72723	15.0702	0.631597	2.36729	5e-05	0.000503098	yes
ENSG00000131171.12	SH3BGRL	16.1998	19.9223	29.8992	32.6271	33.1114	36.8699	ENSG00000131171.12	SH3BGRL	chrX:81201942-81298547	MB231_CTRL	MB231_W2	OK	22.0071	34.2028	0.636145	3.11467	5e-05	0.000503098	yes
ENSG00000131174.4	COX7B	87.8251	77.8786	87.1641	200.681	199.191	183.622	ENSG00000131174.4	COX7B	chrX:77899437-77907373	MB231_CTRL	MB231_W2	OK	84.2893	194.498	1.20633	4.94293	5e-05	0.000503098	yes
ENSG00000131236.16	CAP1	162.861	197.994	221.211	100.784	92.9042	84.7401	ENSG00000131236.16	CAP1	chr1:40040232-40072649	MB231_CTRL	MB231_W2	OK	194.022	92.8095	-1.06388	-4.19237	5e-05	0.000503098	yes
ENSG00000131238.16	PPT1	50.4859	52.3308	51.9746	32.3612	39.6611	40.1669	ENSG00000131238.16	PPT1	chr1:40072704-40097703	MB231_CTRL	MB231_W2	OK	51.5971	37.3964	-0.464391	-2.042	0.00085	0.00593698	yes
ENSG00000131263.12	RLIM	26.5773	29.251	31.8202	17.1249	20.1975	20.3272	ENSG00000131263.12	RLIM	chrX:74585216-74614617	MB231_CTRL	MB231_W2	OK	29.2162	19.2166	-0.604417	-3.58493	5e-05	0.000503098	yes
ENSG00000131323.14	TRAF3	13.7146	13.7609	15.1353	11.3151	11.7381	10.5724	ENSG00000131323.14	TRAF3	chr14:102777475-102911500	MB231_CTRL	MB231_W2	OK	14.2036	11.2085	-0.341664	-1.40081	0.00905	0.0411139	yes
ENSG00000131374.14	TBC1D5	10.5666	14.9409	14.8932	7.05542	6.80215	9.19771	ENSG00000131374.14	TBC1D5	chr3:17157161-18920401	MB231_CTRL	MB231_W2	OK	13.4669	7.68509	-0.809285	-1.23612	0.00295	0.0166971	yes
ENSG00000131459.12	GFPT2	15.6496	20.1512	18.869	10.2633	12.4364	9.45296	ENSG00000131459.12	GFPT2	chr5:180300689-180353387	MB231_CTRL	MB231_W2	OK	18.2233	10.7175	-0.76581	-2.99057	5e-05	0.000503098	yes
ENSG00000131467.10	PSME3	107.636	105.885	132.521	76.6083	74.7112	79.5071	ENSG00000131467.10	PSME3	chr17:42798791-42843758	MB231_CTRL	MB231_W2	OK	115.347	76.9422	-0.584134	-1.86534	0.0016	0.0101235	yes
ENSG00000131469.12	RPL27	643.014	627.669	559.951	1083	1173.32	1277.17	ENSG00000131469.12	RPL27	chr17:42998272-43002959	MB231_CTRL	MB231_W2	OK	610.211	1177.83	0.94875	5.84451	5e-05	0.000503098	yes
ENSG00000131470.14	PSMC3IP	11.1201	11.2609	13.4273	14.2704	16.6173	17.8862	ENSG00000131470.14	PSMC3IP	chr17:42567067-42577831	MB231_CTRL	MB231_W2	OK	11.9361	16.258	0.445816	1.48584	0.0103	0.0455513	yes
ENSG00000131473.16	ACLY	71.4386	77.0668	73.0687	33.3482	35.4805	36.7833	ENSG00000131473.16	ACLY	chr17:41866907-41930542	MB231_CTRL	MB231_W2	OK	73.858	35.204	-1.06901	-5.18728	5e-05	0.000503098	yes
ENSG00000131495.8	NDUFA2	53.4006	54.0818	61.2897	65.1456	92.3567	95.9926	ENSG00000131495.8	NDUFA2	chr5:140638739-140662479	MB231_CTRL	MB231_W2	OK	56.2573	84.4983	0.586881	1.64011	0.0056	0.028166	yes
ENSG00000131584.18	ACAP3	9.5527	11.3401	11.3193	24.2846	23.3115	23.0041	ENSG00000131584.18	ACAP3	chr1:1292375-1324691	MB231_CTRL	MB231_W2	OK	10.7374	23.5334	1.13207	2.20738	5e-05	0.000503098	yes
ENSG00000131591.17	C1orf159	7.34081	11.2338	8.65834	18.4269	19.1439	18.4454	ENSG00000131591.17	C1orf159	chr1:1081817-1116361	MB231_CTRL	MB231_W2	OK	9.07765	18.672	1.04049	2.33238	5e-05	0.000503098	yes
ENSG00000131669.9	NINJ1	16.0808	15.9226	13.4271	9.45137	9.33654	10.6611	ENSG00000131669.9	NINJ1	chr9:93121488-93134288	MB231_CTRL	MB231_W2	OK	15.1435	9.81634	-0.625444	-1.97569	0.00045	0.00346901	yes
ENSG00000131697.17	NPHP4	2.21456	3.0677	2.8239	3.67246	4.97556	5.79448	ENSG00000131697.17	NPHP4	chr1:5862810-6101193	MB231_CTRL	MB231_W2	OK	2.70205	4.81417	0.83323	1.66505	0.00075	0.00534003	yes
ENSG00000131711.14	MAP1B	40.0438	47.1104	47.6265	22.4406	36.155	25.7443	ENSG00000131711.14	MAP1B	chr5:72107233-72209570	MB231_CTRL	MB231_W2	OK	44.9269	28.1133	-0.676327	-1.72628	0.0004	0.00314441	yes
ENSG00000131732.11	ZCCHC9	12.8875	12.5575	14.2348	17.5868	20.3138	20.0322	ENSG00000131732.11	ZCCHC9	chr5:81301589-81313297	MB231_CTRL	MB231_W2	OK	13.2266	19.3109	0.545977	1.80022	0.00105	0.00712483	yes
ENSG00000131746.12	TNS4	7.71498	8.02116	8.18137	11.7672	10.8496	10.2822	ENSG00000131746.12	TNS4	chr17:40475827-40501597	MB231_CTRL	MB231_W2	OK	7.97251	10.9664	0.459978	1.54283	0.0051	0.0261694	yes
ENSG00000131778.17	CHD1L	6.11875	7.46181	7.82081	12.7943	10.0666	10.1581	ENSG00000131778.17	CHD1L	chr1:147172770-147517875	MB231_CTRL	MB231_W2	OK	7.13379	11.0063	0.625593	1.4402	0.00945	0.0426495	yes
ENSG00000131791.7	PRKAB2	3.02014	4.8674	4.58369	5.69196	6.69347	8.94429	ENSG00000131791.7	PRKAB2	chr1:147155105-147172550	MB231_CTRL	MB231_W2	OK	4.15708	7.10991	0.774262	1.981	0.00015	0.00134259	yes
ENSG00000131797.12	CLUHP3	0.504107	0.889149	0.439346	3.33377	5.56765	3.1635	ENSG00000131797.12	CLUHP3	chr16:31700589-31711986	MB231_CTRL	MB231_W2	OK	0.610867	4.02164	2.71885	2.34453	5e-05	0.000503098	yes
ENSG00000131828.13	PDHA1	79.2771	68.1848	71.6092	32.8572	36.1972	58.0965	ENSG00000131828.13	PDHA1	chrX:19343892-19515261	MB231_CTRL	MB231_W2	OK	73.0237	42.3836	-0.784857	-1.94248	0.00165	0.0103809	yes
ENSG00000131848.9	ZSCAN5A	2.02561	1.26692	1.33859	3.30832	2.65266	9.16302	ENSG00000131848.9	ZSCAN5A	chr19:56219669-56393545	MB231_CTRL	MB231_W2	OK	1.54371	5.04134	1.7074	1.29844	0.00035	0.00280437	yes
ENSG00000131981.15	LGALS3	56.1844	61.9344	63.7238	44.5639	48.2957	56.538	ENSG00000131981.15	LGALS3	chr14:55124109-55145413	MB231_CTRL	MB231_W2	OK	60.6142	49.7992	-0.283532	-1.45094	0.01005	0.0446965	yes
ENSG00000132003.9	ZSWIM4	2.60134	3.85341	3.18806	4.30299	4.96657	5.55713	ENSG00000132003.9	ZSWIM4	chr19:13795459-13832230	MB231_CTRL	MB231_W2	OK	3.21427	4.94223	0.62067	1.73548	0.00365	0.0198601	yes
ENSG00000132016.11	C19orf57	0.719663	0.723643	0.177575	2.15698	3.01864	1.17729	ENSG00000132016.11	C19orf57	chr19:13882347-13930879	MB231_CTRL	MB231_W2	OK	0.540294	2.11764	1.97064	0.821696	0.0072	0.0343723	yes
ENSG00000132017.10	DCAF15	12.1979	12.7902	15.0897	21.4343	24.1265	25.9441	ENSG00000132017.10	DCAF15	chr19:13931186-13961449	MB231_CTRL	MB231_W2	OK	13.3593	23.835	0.835237	2.58149	5e-05	0.000503098	yes
ENSG00000132024.17	CC2D1A	3.32139	4.28059	4.38194	7.13014	9.12305	10.0698	ENSG00000132024.17	CC2D1A	chr19:13882347-13930879	MB231_CTRL	MB231_W2	OK	3.99464	8.77432	1.13522	2.79981	5e-05	0.000503098	yes
ENSG00000132031.12	MATN3	0.90717	0.62951	1.11467	0.890703	1.84612	3.38429	ENSG00000132031.12	MATN3	chr2:19990216-20012694	MB231_CTRL	MB231_W2	OK	0.883783	2.04037	1.20707	1.39686	0.0042	0.0223325	yes
ENSG00000132109.9	TRIM21	6.48363	8.69839	6.12739	3.95492	3.23074	4.37914	ENSG00000132109.9	TRIM21	chr11:4384896-4393696	MB231_CTRL	MB231_W2	OK	7.10314	3.85494	-0.881749	-2.83746	5e-05	0.000503098	yes
ENSG00000132128.16	LRRC41	34.1861	35.8362	33.8165	21.1284	23.407	19.8441	ENSG00000132128.16	LRRC41	chr1:46247687-46303608	MB231_CTRL	MB231_W2	OK	34.6129	21.4599	-0.689671	-2.99391	5e-05	0.000503098	yes
ENSG00000132182.11	NUP210	6.45334	7.75283	6.51912	3.05846	4.32325	4.12605	ENSG00000132182.11	NUP210	chr3:13316234-13420309	MB231_CTRL	MB231_W2	OK	6.90843	3.83592	-0.848785	-2.5611	5e-05	0.000503098	yes
ENSG00000132199.18	ENOSF1	6.34337	6.68262	7.13165	21.8282	22.4382	23.7446	ENSG00000132199.18	ENOSF1	chr18:596987-712676	MB231_CTRL	MB231_W2	OK	6.71921	22.6703	1.75444	1.90456	5e-05	0.000503098	yes
ENSG00000132274.15	TRIM22	0.842252	0.271901	0.467569	2.87575	1.22181	3.89913	ENSG00000132274.15	TRIM22	chr11:5663556-5938619	MB231_CTRL	MB231_W2	OK	0.527241	2.66556	2.33791	1.15347	0.00015	0.00134259	yes
ENSG00000132286.11	TIMM10B	10.1429	13.7337	12.2525	21.0444	23.1906	26.5783	ENSG00000132286.11	TIMM10B	chr11:6474682-6484679	MB231_CTRL	MB231_W2	OK	12.043	23.6045	0.970862	2.70599	5e-05	0.000503098	yes
ENSG00000132300.18	PTCD3	58.3852	50.8016	62.2093	90.2253	81.2876	75.7193	ENSG00000132300.18	PTCD3	chr2:86106181-86142157	MB231_CTRL	MB231_W2	OK	57.132	82.4108	0.528533	1.7412	0.0006	0.00442867	yes
ENSG00000132323.8	ILKAP	10.8479	14.2474	14.1474	25.6419	20.8229	24.8558	ENSG00000132323.8	ILKAP	chr2:238170400-238203729	MB231_CTRL	MB231_W2	OK	13.0809	23.7735	0.861892	2.53433	5e-05	0.000503098	yes
ENSG00000132329.10	RAMP1	36.894	37.2209	25.8969	13.6225	23.5382	15.4579	ENSG00000132329.10	RAMP1	chr2:237858892-237912114	MB231_CTRL	MB231_W2	OK	33.3373	17.5395	-0.926527	-3.44934	5e-05	0.000503098	yes
ENSG00000132357.13	CARD6	3.85486	4.21199	4.58882	2.52059	2.6648	3.01551	ENSG00000132357.13	CARD6	chr5:40841183-40860175	MB231_CTRL	MB231_W2	OK	4.21855	2.73363	-0.625929	-1.92708	0.00135	0.00878859	yes
ENSG00000132383.11	RPA1	40.9287	43.4909	42.8039	24.3222	25.8002	23.7838	ENSG00000132383.11	RPA1	chr17:1779484-1900082	MB231_CTRL	MB231_W2	OK	42.4078	24.6354	-0.783599	-3.05296	5e-05	0.000503098	yes
ENSG00000132424.14	PNISR	11.0788	12.3328	13.7338	33.4103	40.5797	44.0972	ENSG00000132424.14	PNISR	chr6:99398050-99431373	MB231_CTRL	MB231_W2	OK	12.3818	39.3624	1.6686	5.01854	5e-05	0.000503098	yes
ENSG00000132432.13	SEC61G	234.98	226.42	217.051	464.193	471.329	531.631	ENSG00000132432.13	SEC61G	chr7:54752249-54804928	MB231_CTRL	MB231_W2	OK	226.15	489.051	1.1127	6.61376	5e-05	0.000503098	yes
ENSG00000132463.13	GRSF1	55.2892	58.6862	59.9544	45.8568	44.6568	46.1268	ENSG00000132463.13	GRSF1	chr4:70815781-70839945	MB231_CTRL	MB231_W2	OK	57.9766	45.5468	-0.348122	-1.88365	0.0009	0.00624357	yes
ENSG00000132466.17	ANKRD17	23.3039	27.4031	28.3364	17.7213	19.6479	15.8314	ENSG00000132466.17	ANKRD17	chr4:73073375-73258798	MB231_CTRL	MB231_W2	OK	26.3478	17.7335	-0.571203	-2.20473	0.0003	0.00245627	yes
ENSG00000132470.13	ITGB4	47.0322	49.3665	37.0505	29.2636	32.0061	22.9705	ENSG00000132470.13	ITGB4	chr17:75721327-75765711	MB231_CTRL	MB231_W2	OK	44.4831	28.0801	-0.66371	-1.49758	0.01035	0.045719	yes
ENSG00000132471.11	WBP2	70.2202	74.1709	66.5139	43.2789	38.5589	41.5548	ENSG00000132471.11	WBP2	chr17:75845698-75856507	MB231_CTRL	MB231_W2	OK	70.3017	41.1309	-0.773338	-3.83503	5e-05	0.000503098	yes
ENSG00000132481.6	TRIM47	28.1697	29.1415	29.9898	16.5213	13.539	12.3779	ENSG00000132481.6	TRIM47	chr17:75874160-75879546	MB231_CTRL	MB231_W2	OK	29.1003	14.1461	-1.04063	-3.30527	5e-05	0.000503098	yes
ENSG00000132485.13	ZRANB2	19.04	24.483	27.3692	50.2941	58.8314	56.8213	ENSG00000132485.13	ZRANB2	chr1:71048854-71081297	MB231_CTRL	MB231_W2	OK	23.6307	55.3156	1.22702	5.09694	5e-05	0.000503098	yes
ENSG00000132507.17	EIF5A	459.386	453.274	448.731	279.748	326.473	279.075	ENSG00000132507.17	EIF5A	chr17:7306998-7329393	MB231_CTRL	MB231_W2	OK	453.797	295.099	-0.620848	-2.90301	5e-05	0.000503098	yes
ENSG00000132530.16	XAF1	1.70528	1.42692	2.06945	6.43381	3.48827	6.61635	ENSG00000132530.16	XAF1	chr17:6755446-6776116	MB231_CTRL	MB231_W2	OK	1.73388	5.51281	1.66878	1.29782	5e-05	0.000503098	yes
ENSG00000132589.15	FLOT2	35.0273	37.8668	36.6411	21.1565	27.5374	27.6505	ENSG00000132589.15	FLOT2	chr17:28879334-28897679	MB231_CTRL	MB231_W2	OK	36.5117	25.4481	-0.520801	-2.3639	5e-05	0.000503098	yes
ENSG00000132600.16	PRMT7	9.47129	12.4002	10.1966	12.5129	17.5197	18.5148	ENSG00000132600.16	PRMT7	chr16:68310973-68448688	MB231_CTRL	MB231_W2	OK	10.6894	16.1825	0.598253	1.27082	0.00665	0.0322099	yes
ENSG00000132635.16	PCED1A	8.28628	10.8277	10.7331	17.1195	24.2843	18.5118	ENSG00000132635.16	PCED1A	chr20:2835313-3039076	MB231_CTRL	MB231_W2	OK	9.94901	19.9719	1.00535	1.95682	0.00125	0.00825545	yes
ENSG00000132646.10	PCNA	166.984	172.797	167.406	241.517	263.572	249.654	ENSG00000132646.10	PCNA	chr20:5114952-5126626	MB231_CTRL	MB231_W2	OK	169.062	251.581	0.573467	3.50559	5e-05	0.000503098	yes
ENSG00000132680.10	KIAA0907	16.4833	17.4627	20.4287	45.6373	52.0733	54.4977	ENSG00000132680.10	KIAA0907	chr1:155913042-155934400	MB231_CTRL	MB231_W2	OK	18.1249	50.7361	1.48504	4.95371	5e-05	0.000503098	yes
ENSG00000132716.18	DCAF8	27.1838	36.2509	40.639	54.3051	50.6503	54.8679	ENSG00000132716.18	DCAF8	chr1:160215714-160286348	MB231_CTRL	MB231_W2	OK	34.6912	53.2744	0.618871	1.56504	0.0034	0.0187451	yes
ENSG00000132781.17	MUTYH	3.79843	4.2997	6.4964	13.1286	12.9255	12.2831	ENSG00000132781.17	MUTYH	chr1:45329162-45491166	MB231_CTRL	MB231_W2	OK	4.86484	12.7791	1.39332	1.88458	5e-05	0.000503098	yes
ENSG00000132792.18	CTNNBL1	17.0114	18.5757	21.5882	10.0061	10.9241	11.8947	ENSG00000132792.18	CTNNBL1	chr20:37693954-37872129	MB231_CTRL	MB231_W2	OK	19.0584	10.9416	-0.800603	-3.75921	5e-05	0.000503098	yes
ENSG00000132793.11	LPIN3	2.43596	2.49375	2.0222	7.30244	9.3696	9.56261	ENSG00000132793.11	LPIN3	chr20:41340919-41366827	MB231_CTRL	MB231_W2	OK	2.3173	8.74488	1.91599	3.39326	5e-05	0.000503098	yes
ENSG00000132821.11	VSTM2L	25.2883	30.4646	27.2917	15.6764	9.25976	13.8375	ENSG00000132821.11	VSTM2L	chr20:37903103-37945350	MB231_CTRL	MB231_W2	OK	27.6815	12.9246	-1.09881	-3.32247	5e-05	0.000503098	yes
ENSG00000132823.10	OSER1	35.4081	39.7791	42.1506	40.0108	55.2165	50.8237	ENSG00000132823.10	OSER1	chr20:44196495-44210791	MB231_CTRL	MB231_W2	OK	39.1126	48.6837	0.315805	1.92468	0.001	0.00683457	yes
ENSG00000132824.13	SERINC3	59.6496	69.0994	71.3091	52.3424	53.6354	52.3495	ENSG00000132824.13	SERINC3	chr20:44496220-44522109	MB231_CTRL	MB231_W2	OK	66.686	52.7757	-0.33751	-1.7691	0.0015	0.00960482	yes
ENSG00000132842.13	AP3B1	18.8621	19.1905	21.0791	13.1127	12.3367	12.0311	ENSG00000132842.13	AP3B1	chr5:78000524-78294755	MB231_CTRL	MB231_W2	OK	19.7106	12.4935	-0.657796	-2.62462	5e-05	0.000503098	yes
ENSG00000132952.11	USPL1	3.98522	3.362	3.28799	5.76706	7.04824	3.48653	ENSG00000132952.11	USPL1	chr13:30617692-30660770	MB231_CTRL	MB231_W2	OK	3.54507	5.43394	0.616185	1.70901	0.003	0.0169143	yes
ENSG00000132963.7	POMP	58.7618	65.9839	74.0296	84.1687	79.6575	88.0728	ENSG00000132963.7	POMP	chr13:28659103-28678925	MB231_CTRL	MB231_W2	OK	66.2584	83.9663	0.341707	1.99297	0.0004	0.00314441	yes
ENSG00000132964.11	CDK8	7.27495	6.5209	8.1612	4.63568	6.19105	5.41949	ENSG00000132964.11	CDK8	chr13:26254103-26405238	MB231_CTRL	MB231_W2	OK	7.31902	5.41541	-0.434581	-1.4666	0.00465	0.024312	yes
ENSG00000132967.9	HMGB1P5	4.35285	5.48272	4.96243	1.20875	3.10049	3.50971	ENSG00000132967.9	HMGB1P5	chr3:22381818-22382929	MB231_CTRL	MB231_W2	OK	4.93267	2.60632	-0.920355	-1.80398	0.0028	0.01604	yes
ENSG00000133026.12	MYH10	27.063	29.7117	31.6479	15.9221	15.6153	12.1076	ENSG00000133026.12	MYH10	chr17:8413130-8630761	MB231_CTRL	MB231_W2	OK	29.4742	14.5484	-1.0186	-2.07132	0.00015	0.00134259	yes
ENSG00000133112.16	TPT1	515.521	541.099	508.019	876.588	1018.88	1044.95	ENSG00000133112.16	TPT1	chr13:45333470-45420371	MB231_CTRL	MB231_W2	OK	521.546	980.138	0.910189	4.74786	5e-05	0.000503098	yes
ENSG00000133119.12	RFC3	14.0363	15.441	18.7747	25.6259	23.1809	22.2359	ENSG00000133119.12	RFC3	chr13:33818048-33966558	MB231_CTRL	MB231_W2	OK	16.084	23.6809	0.558096	2.54142	5e-05	0.000503098	yes
ENSG00000133134.11	BEX2	2.21894	3.17421	2.80831	4.18182	4.50347	7.78089	ENSG00000133134.11	BEX2	chrX:103309345-103311046	MB231_CTRL	MB231_W2	OK	2.73382	5.48873	1.00555	2.23761	0.00025	0.00209262	yes
ENSG00000133216.16	EPHB2	47.573	46.5394	47.822	22.3603	32.8759	28.5806	ENSG00000133216.16	EPHB2	chr1:22710838-22921500	MB231_CTRL	MB231_W2	OK	47.3115	27.9389	-0.759914	-3.15878	5e-05	0.000503098	yes
ENSG00000133226.16	SRRM1	44.9701	56.7282	50.372	71.8753	82.951	73.1691	ENSG00000133226.16	SRRM1	chr1:24631715-24673267	MB231_CTRL	MB231_W2	OK	50.6901	75.9985	0.584266	1.87025	0.0005	0.00379645	yes
ENSG00000133247.13	KMT5C	2.35913	3.00948	3.39234	5.24534	8.09537	5.97044	ENSG00000133247.13	KMT5C	chr19:55339852-55348120	MB231_CTRL	MB231_W2	OK	2.92031	6.43705	1.14028	1.58671	0.0009	0.00624357	yes
ENSG00000133265.10	HSPBP1	27.6225	33.3795	31.732	13.2056	15.2642	19.1894	ENSG00000133265.10	HSPBP1	chr19:55262230-55280381	MB231_CTRL	MB231_W2	OK	30.9113	15.8864	-0.960343	-3.47833	5e-05	0.000503098	yes
ENSG00000133313.14	CNDP2	91.7434	95.4503	100.471	53.2998	52.4524	59.6816	ENSG00000133313.14	CNDP2	chr18:74495815-74523454	MB231_CTRL	MB231_W2	OK	95.8883	55.1446	-0.798135	-3.04309	5e-05	0.000503098	yes
ENSG00000133318.13	RTN3	97.5756	112.433	111.562	70.3848	58.0119	81.3237	ENSG00000133318.13	RTN3	chr11:63681445-63759891	MB231_CTRL	MB231_W2	OK	107.19	69.9068	-0.61667	-2.97101	5e-05	0.000503098	yes
ENSG00000133393.12	FOPNL	35.3895	36.8012	40.1137	47.2253	56.3709	55.5443	ENSG00000133393.12	FOPNL	chr16:15865719-15888625	MB231_CTRL	MB231_W2	OK	37.4348	53.0468	0.502886	2.59095	5e-05	0.000503098	yes
ENSG00000133422.12	MORC2	7.34688	8.30172	8.30607	5.26058	5.63268	6.16282	ENSG00000133422.12	MORC2	chr22:30922307-30968298	MB231_CTRL	MB231_W2	OK	7.98489	5.68536	-0.490021	-1.5777	0.0032	0.0178059	yes
ENSG00000133460.19	SLC2A11	1.0677	0.877403	1.54516	3.40138	6.93086	1.36435	ENSG00000133460.19	SLC2A11	chr22:23856426-23898930	MB231_CTRL	MB231_W2	OK	1.16342	3.89886	1.74468	0.718731	0.00095	0.00654723	yes
ENSG00000133624.13	ZNF767P	1.62669	3.37243	3.37444	4.49697	13.1301	14.1395	ENSG00000133624.13	ZNF767P	chr7:149547153-149624752	MB231_CTRL	MB231_W2	OK	2.79119	10.5889	1.92359	2.3772	5e-05	0.000503098	yes
ENSG00000133641.17	C12orf29	12.1746	13.6593	14.2533	24.0735	21.0319	22.7449	ENSG00000133641.17	C12orf29	chr12:87980034-88142216	MB231_CTRL	MB231_W2	OK	13.3624	22.6168	0.759211	2.80366	5e-05	0.000503098	yes
ENSG00000133657.14	ATP13A3	99.2721	100.957	115.886	80.6955	69.6189	82.9466	ENSG00000133657.14	ATP13A3	chr3:194402671-194518279	MB231_CTRL	MB231_W2	OK	105.372	77.7537	-0.438502	-1.55046	0.00625	0.0307207	yes
ENSG00000133739.15	LRRCC1	1.11106	1.54119	2.07033	2.28445	2.43346	2.08885	ENSG00000133739.15	LRRCC1	chr8:85107146-85146076	MB231_CTRL	MB231_W2	OK	1.57419	2.26892	0.527396	1.65903	0.0023	0.0136382	yes
ENSG00000133789.14	SWAP70	20.0752	24.0216	25.8078	12.8217	14.6366	16.5198	ENSG00000133789.14	SWAP70	chr11:9664076-9752991	MB231_CTRL	MB231_W2	OK	23.3015	14.6594	-0.6686	-3.19599	5e-05	0.000503098	yes
ENSG00000133835.14	HSD17B4	76.5142	92.372	95.0519	51.5876	55.8863	54.096	ENSG00000133835.14	HSD17B4	chr5:119452442-119637199	MB231_CTRL	MB231_W2	OK	87.9794	53.8567	-0.708041	-1.90924	0.001	0.00683457	yes
ENSG00000133858.15	ZFC3H1	10.4198	7.84007	11.8781	20.4443	16.0635	19.6713	ENSG00000133858.15	ZFC3H1	chr12:71609471-71705046	MB231_CTRL	MB231_W2	OK	10.046	18.7263	0.898451	1.43081	0.00595	0.0295648	yes
ENSG00000133895.14	MEN1	26.8281	37.1871	32.323	22.4199	21.2186	21.9812	ENSG00000133895.14	MEN1	chr11:64803509-64811294	MB231_CTRL	MB231_W2	OK	32.1127	21.8732	-0.553979	-2.32035	5e-05	0.000503098	yes
ENSG00000133943.20	C14orf159	6.91417	7.6429	7.18664	10.5738	13.0226	10.5998	ENSG00000133943.20	C14orf159	chr14:90847861-91225632	MB231_CTRL	MB231_W2	OK	7.2479	11.3988	0.653241	1.05664	0.011	0.0479798	yes
ENSG00000134030.13	CTIF	6.00239	6.00009	5.89706	9.94404	15.0698	13.8305	ENSG00000134030.13	CTIF	chr18:48539045-48863217	MB231_CTRL	MB231_W2	OK	5.96651	12.9481	1.11778	2.57095	5e-05	0.000503098	yes
ENSG00000134049.4	IER3IP1	23.5287	24.3885	23.3984	30.2431	36.3217	36.1242	ENSG00000134049.4	IER3IP1	chr18:47105945-47176374	MB231_CTRL	MB231_W2	OK	23.7719	34.2297	0.525991	2.78058	5e-05	0.000503098	yes
ENSG00000134070.4	IRAK2	5.02888	6.36795	4.36977	3.82034	3.12036	3.4055	ENSG00000134070.4	IRAK2	chr3:10164864-10243743	MB231_CTRL	MB231_W2	OK	5.25553	3.44873	-0.607771	-2.35997	0.0001	0.000939965	yes
ENSG00000134086.7	VHL	21.7434	25.2284	27.1828	23.6726	36.0075	32.018	ENSG00000134086.7	VHL	chr3:10141007-10152220	MB231_CTRL	MB231_W2	OK	24.7182	30.566	0.306358	1.61629	0.0048	0.0249446	yes
ENSG00000134152.10	KATNBL1	16.878	16.9766	18.0376	33.3262	30.2333	31.1062	ENSG00000134152.10	KATNBL1	chr15:34140673-34210096	MB231_CTRL	MB231_W2	OK	17.2974	31.5552	0.867325	2.31185	5e-05	0.000503098	yes
ENSG00000134186.11	PRPF38B	21.3169	22.7263	24.8673	44.1853	43.7313	45.3192	ENSG00000134186.11	PRPF38B	chr1:108692322-108701803	MB231_CTRL	MB231_W2	OK	22.9702	44.412	0.951186	3.64281	5e-05	0.000503098	yes
ENSG00000134222.16	PSRC1	16.9712	19.0227	20.7737	36.4267	40.9739	39.1197	ENSG00000134222.16	PSRC1	chr1:109279555-109283186	MB231_CTRL	MB231_W2	OK	18.9225	38.8401	1.03744	4.53956	5e-05	0.000503098	yes
ENSG00000134243.11	SORT1	41.3366	43.7448	44.7252	28.0352	29.1564	27.7847	ENSG00000134243.11	SORT1	chr1:109309567-109397951	MB231_CTRL	MB231_W2	OK	43.2689	28.3254	-0.611231	-2.38937	0.0001	0.000939965	yes
ENSG00000134253.9	TRIM45	0.536546	0.325812	0.738467	1.113	1.90224	4.20606	ENSG00000134253.9	TRIM45	chr1:117111059-117122587	MB231_CTRL	MB231_W2	OK	0.533608	2.4071	2.17344	1.70776	5e-05	0.000503098	yes
ENSG00000134262.12	AP4B1	7.54724	7.17679	5.85549	12.4042	12.705	12.2608	ENSG00000134262.12	AP4B1	chr1:113761831-113914086	MB231_CTRL	MB231_W2	OK	6.85984	12.4567	0.860671	1.47158	0.00475	0.0247357	yes
ENSG00000134287.9	ARF3	58.1313	58.666	62.2444	41.7132	42.5149	42.6932	ENSG00000134287.9	ARF3	chr12:48903417-48957551	MB231_CTRL	MB231_W2	OK	59.6806	42.3071	-0.49636	-2.05348	0.0003	0.00245627	yes
ENSG00000134291.11	TMEM106C	25.051	27.5538	25.6733	60.6986	53.7507	73.7005	ENSG00000134291.11	TMEM106C	chr12:47963568-47968878	MB231_CTRL	MB231_W2	OK	26.0927	62.7166	1.2652	4.59391	5e-05	0.000503098	yes
ENSG00000134308.13	YWHAQ	290.905	309.595	291.141	208.774	237.848	235.356	ENSG00000134308.13	YWHAQ	chr2:9583971-9631014	MB231_CTRL	MB231_W2	OK	297.214	227.326	-0.386739	-2.21569	5e-05	0.000503098	yes
ENSG00000134313.14	KIDINS220	13.4683	16.297	13.8954	9.51157	9.35475	13.4778	ENSG00000134313.14	KIDINS220	chr2:8725277-8837630	MB231_CTRL	MB231_W2	OK	14.5536	10.7814	-0.432832	-1.41573	0.0079	0.0370137	yes
ENSG00000134333.13	LDHA	1120.54	1226.04	1138.7	735.496	752.963	732.289	ENSG00000134333.13	LDHA	chr11:18394387-18408425	MB231_CTRL	MB231_W2	OK	1161.76	740.249	-0.650229	-3.76629	5e-05	0.000503098	yes
ENSG00000134371.10	CDC73	12.0335	11.1172	10.8824	8.96485	6.85551	7.72885	ENSG00000134371.10	CDC73	chr1:193122016-193253901	MB231_CTRL	MB231_W2	OK	11.3444	7.84974	-0.531258	-1.53573	0.0043	0.0227428	yes
ENSG00000134419.15	RPS15A	321.602	361.04	283.53	616.499	710.625	753.614	ENSG00000134419.15	RPS15A	chr16:18781294-18801678	MB231_CTRL	MB231_W2	OK	322.057	693.579	1.10674	4.64113	5e-05	0.000503098	yes
ENSG00000134440.11	NARS	70.8532	71.9242	75.3628	54.9743	48.3529	60.3306	ENSG00000134440.11	NARS	chr18:57600655-57622213	MB231_CTRL	MB231_W2	OK	72.7134	54.5526	-0.414573	-1.62589	0.0051	0.0261694	yes
ENSG00000134453.15	RBM17	28.8237	25.8835	26.6006	40.2889	36.7137	52.7176	ENSG00000134453.15	RBM17	chr10:6088986-6117457	MB231_CTRL	MB231_W2	OK	27.1026	43.2401	0.673937	2.58915	5e-05	0.000503098	yes
ENSG00000134480.13	CCNH	16.3576	16.6128	17.5703	34.7718	36.1589	32.1644	ENSG00000134480.13	CCNH	chr5:87267887-87413019	MB231_CTRL	MB231_W2	OK	16.8469	34.365	1.02846	2.5663	5e-05	0.000503098	yes
ENSG00000134602.15	STK26	6.11593	6.58307	7.19996	8.56907	9.83862	8.64382	ENSG00000134602.15	STK26	chrX:132023264-132075943	MB231_CTRL	MB231_W2	OK	6.63299	9.01717	0.443016	1.85673	0.00165	0.0103809	yes
ENSG00000134668.12	SPOCD1	2.28575	2.43507	2.11698	3.35162	4.10388	5.29433	ENSG00000134668.12	SPOCD1	chr1:31789129-31816051	MB231_CTRL	MB231_W2	OK	2.27927	4.24994	0.898874	1.19681	0.00165	0.0103809	yes
ENSG00000134717.17	BTF3L4	21.7639	23.562	21.769	30.5201	30.0766	31.5517	ENSG00000134717.17	BTF3L4	chr1:52020130-52090716	MB231_CTRL	MB231_W2	OK	22.365	30.7162	0.457756	1.63087	0.00425	0.0225604	yes
ENSG00000134759.13	ELP2	14.5368	16.0072	18.1087	22.185	33.1517	24.5723	ENSG00000134759.13	ELP2	chr18:36129443-36187448	MB231_CTRL	MB231_W2	OK	16.2176	26.6363	0.715837	1.3307	0.00715	0.0341897	yes
ENSG00000134769.21	DTNA	1.41521	1.14791	0.485793	1.54159	2.42747	4.78145	ENSG00000134769.21	DTNA	chr18:34493289-34891844	MB231_CTRL	MB231_W2	OK	1.0163	2.91684	1.52107	0.650425	0.0003	0.00245627	yes
ENSG00000134809.8	TIMM10	54.3112	52.6253	48.9757	59.7975	78.6495	73.8843	ENSG00000134809.8	TIMM10	chr11:57528462-57530803	MB231_CTRL	MB231_W2	OK	51.9708	70.7771	0.445582	2.32464	0.0001	0.000939965	yes
ENSG00000134851.12	TMEM165	82.0316	81.9752	85.9832	118.773	121.933	126.697	ENSG00000134851.12	TMEM165	chr4:55395956-55547889	MB231_CTRL	MB231_W2	OK	83.33	122.468	0.555495	2.19438	0.00015	0.00134259	yes
ENSG00000134884.13	ARGLU1	17.0067	21.2672	25.1803	47.5932	44.985	51.3281	ENSG00000134884.13	ARGLU1	chr13:106541672-106568164	MB231_CTRL	MB231_W2	OK	21.1514	47.9688	1.18134	4.61466	5e-05	0.000503098	yes
ENSG00000134899.18	ERCC5	6.1702	5.38302	6.88178	12.3606	15.7408	10.6761	ENSG00000134899.18	ERCC5	chr13:102799048-102876001	MB231_CTRL	MB231_W2	OK	6.145	12.9258	1.07277	1.9329	0.0006	0.00442867	yes
ENSG00000134905.16	CARS2	23.733	26.5672	22.4684	42.4293	42.1403	36.5818	ENSG00000134905.16	CARS2	chr13:110641411-110723339	MB231_CTRL	MB231_W2	OK	24.2562	40.3838	0.735422	1.85282	0.00015	0.00134259	yes
ENSG00000134910.12	STT3A	221.345	193.199	192.55	118.283	101.94	138.896	ENSG00000134910.12	STT3A	chr11:125569215-125681123	MB231_CTRL	MB231_W2	OK	202.365	119.706	-0.757462	-1.82084	0.002	0.0121525	yes
ENSG00000134955.11	SLC37A2	17.9078	22.2136	18.915	21.1192	29.8159	25.7938	ENSG00000134955.11	SLC37A2	chr11:125063066-125090312	MB231_CTRL	MB231_W2	OK	19.6788	25.5763	0.378165	1.76127	0.00255	0.014853	yes
ENSG00000134986.13	NREP	11.026	12.8105	10.7337	18.9352	21.1755	21.0012	ENSG00000134986.13	NREP	chr5:111496032-112017309	MB231_CTRL	MB231_W2	OK	11.5234	20.3706	0.821921	2.05653	5e-05	0.000503098	yes
ENSG00000135018.13	UBQLN1	75.8163	91.5816	84.3571	49.8564	54.7731	54.7846	ENSG00000135018.13	UBQLN1	chr9:83659962-83713378	MB231_CTRL	MB231_W2	OK	83.9183	53.138	-0.659241	-3.59701	5e-05	0.000503098	yes
ENSG00000135047.14	CTSL	31.5662	33.3159	32.7626	14.332	16.8962	14.3306	ENSG00000135047.14	CTSL	chr9:87725518-87731393	MB231_CTRL	MB231_W2	OK	32.5482	15.1863	-1.09981	-5.07704	5e-05	0.000503098	yes
ENSG00000135048.13	TMEM2	8.68358	11.4112	7.77319	12.4632	17.447	19.5506	ENSG00000135048.13	TMEM2	chr9:71683365-71816690	MB231_CTRL	MB231_W2	OK	9.28932	16.4869	0.827678	1.57179	0.00125	0.00825545	yes
ENSG00000135052.16	GOLM1	66.7013	73.4466	71.4068	43.1458	45.2052	45.9392	ENSG00000135052.16	GOLM1	chr9:86026145-86100173	MB231_CTRL	MB231_W2	OK	70.5182	44.7634	-0.655678	-2.41313	5e-05	0.000503098	yes
ENSG00000135069.13	PSAT1	26.3252	31.2122	26.8282	21.7257	25.8864	21.8654	ENSG00000135069.13	PSAT1	chr9:78297142-78330093	MB231_CTRL	MB231_W2	OK	28.1219	23.1592	-0.280109	-1.48688	0.0087	0.0399168	yes
ENSG00000135070.14	ISCA1	19.0295	19.2382	20.6933	30.209	30.0321	26.7642	ENSG00000135070.14	ISCA1	chr9:86264545-86283102	MB231_CTRL	MB231_W2	OK	19.6537	29.0018	0.561342	2.44818	5e-05	0.000503098	yes
ENSG00000135108.14	FBXO21	32.8758	36.8499	40.5475	23.9901	22.514	19.3669	ENSG00000135108.14	FBXO21	chr12:117099480-117190531	MB231_CTRL	MB231_W2	OK	36.7577	21.957	-0.743367	-1.85208	0.00155	0.00984337	yes
ENSG00000135164.18	DMTF1	12.5127	13.5693	9.82147	34.5169	47.2325	40.6459	ENSG00000135164.18	DMTF1	chr7:87151422-87220587	MB231_CTRL	MB231_W2	OK	11.9678	40.7984	1.76935	3.23004	5e-05	0.000503098	yes
ENSG00000135185.11	TMEM243	16.77	17.297	12.6409	30.9689	29.8403	32.4303	ENSG00000135185.11	TMEM243	chr7:87151422-87220587	MB231_CTRL	MB231_W2	OK	15.5693	31.0798	0.997274	2.27337	5e-05	0.000503098	yes
ENSG00000135205.14	CCDC146	0.437847	1.88828	0.340224	2.21676	2.56781	7.49247	ENSG00000135205.14	CCDC146	chr7:76959834-77416400	MB231_CTRL	MB231_W2	OK	0.888784	4.09235	2.20302	1.28737	0.0017	0.0106371	yes
ENSG00000135211.5	TMEM60	13.9536	13.4895	11.21	21.7553	26.5675	28.9718	ENSG00000135211.5	TMEM60	chr7:77793727-77798580	MB231_CTRL	MB231_W2	OK	12.8844	25.7649	0.999784	2.9772	5e-05	0.000503098	yes
ENSG00000135245.9	HILPDA	12.8693	11.4342	10.0635	12.8913	23.4626	25.4645	ENSG00000135245.9	HILPDA	chr7:128455839-128506602	MB231_CTRL	MB231_W2	OK	11.4557	20.6061	0.847008	1.50009	0.0115	0.0495779	yes
ENSG00000135249.7	RINT1	13.0344	15.3097	14.4844	18.2207	26.1242	20.7946	ENSG00000135249.7	RINT1	chr7:105532084-105600875	MB231_CTRL	MB231_W2	OK	14.2762	21.7131	0.604958	1.89858	0.00055	0.0041207	yes
ENSG00000135272.9	MDFIC	15.878	19.4925	20.3955	11.6393	10.8094	17.5326	ENSG00000135272.9	MDFIC	chr7:114922153-115019916	MB231_CTRL	MB231_W2	OK	18.5887	13.3271	-0.480062	-1.44026	0.0092	0.0416604	yes
ENSG00000135314.12	KHDC1	9.94087	7.78864	8.5793	10.2048	15.7921	12.0739	ENSG00000135314.12	KHDC1	chr6:73209082-73310365	MB231_CTRL	MB231_W2	OK	8.7696	12.6902	0.533137	1.41762	0.0091	0.0413014	yes
ENSG00000135315.11	CEP162	0.968534	1.06832	1.20522	1.7089	1.87768	3.30349	ENSG00000135315.11	CEP162	chr6:84124240-84227635	MB231_CTRL	MB231_W2	OK	1.08069	2.29669	1.0876	1.72666	0.0013	0.00851582	yes
ENSG00000135316.17	SYNCRIP	61.1766	67.189	69.9829	45.4011	39.6186	42.1169	ENSG00000135316.17	SYNCRIP	chr6:85505495-85643792	MB231_CTRL	MB231_W2	OK	66.1162	42.3788	-0.64166	-3.46908	5e-05	0.000503098	yes
ENSG00000135441.7	BLOC1S1	18.311	26.9073	24.7586	32.6689	39.0006	36.7615	ENSG00000135441.7	BLOC1S1	chr12:55681545-55724705	MB231_CTRL	MB231_W2	OK	23.3257	36.1437	0.631825	2.528	5e-05	0.000503098	yes
ENSG00000135451.12	TROAP	15.3207	19.3611	16.4844	37.7391	52.4256	55.1086	ENSG00000135451.12	TROAP	chr12:49292630-49331731	MB231_CTRL	MB231_W2	OK	17.0554	48.4244	1.50551	4.16604	5e-05	0.000503098	yes
ENSG00000135454.13	B4GALNT1	2.50878	1.89962	0.96732	2.40132	4.92874	5.58489	ENSG00000135454.13	B4GALNT1	chr12:57610179-57633355	MB231_CTRL	MB231_W2	OK	1.7919	4.30498	1.26451	1.0475	0.00235	0.0138868	yes
ENSG00000135469.13	COQ10A	6.23772	6.97595	4.15284	15.3376	15.4044	7.14097	ENSG00000135469.13	COQ10A	chr12:56266857-56270966	MB231_CTRL	MB231_W2	OK	5.78884	12.6277	1.12524	2.05485	5e-05	0.000503098	yes
ENSG00000135473.14	PAN2	2.88412	2.42386	2.30818	14.366	10.3742	23.1636	ENSG00000135473.14	PAN2	chr12:56271698-56334053	MB231_CTRL	MB231_W2	OK	2.53872	15.9679	2.653	1.79161	5e-05	0.000503098	yes
ENSG00000135476.11	ESPL1	12.2517	10.5033	9.40106	24.2189	22.0803	19.9126	ENSG00000135476.11	ESPL1	chr12:53268298-53293643	MB231_CTRL	MB231_W2	OK	10.7187	22.0706	1.042	2.45709	5e-05	0.000503098	yes
ENSG00000135482.6	ZC3H10	0.818276	1.39242	1.6843	6.59126	4.3081	5.15385	ENSG00000135482.6	ZC3H10	chr12:56118158-56144671	MB231_CTRL	MB231_W2	OK	1.29833	5.35107	2.04317	1.6021	0.00015	0.00134259	yes
ENSG00000135596.17	MICAL1	1.77701	3.53103	3.05291	7.63497	5.26192	7.78473	ENSG00000135596.17	MICAL1	chr6:109444061-109483237	MB231_CTRL	MB231_W2	OK	2.78698	6.89387	1.30661	1.90197	0.0001	0.000939965	yes
ENSG00000135597.18	REPS1	16.5196	18.2329	18.5856	7.75203	9.89311	11.6237	ENSG00000135597.18	REPS1	chr6:138795925-138988261	MB231_CTRL	MB231_W2	OK	17.7794	9.75629	-0.865799	-1.91928	5e-05	0.000503098	yes
ENSG00000135617.3	PRADC1	5.51841	6.05626	8.26461	7.01906	13.7706	10.947	ENSG00000135617.3	PRADC1	chr2:73228005-73233238	MB231_CTRL	MB231_W2	OK	6.61309	10.5789	0.67779	1.57769	0.0033	0.0182709	yes
ENSG00000135624.15	CCT7	150.995	149.886	186.1	105.411	90.7203	86.267	ENSG00000135624.15	CCT7	chr2:73233419-73253021	MB231_CTRL	MB231_W2	OK	162.327	94.1327	-0.786135	-1.74531	0.0011	0.00740172	yes
ENSG00000135631.16	RAB11FIP5	26.3765	33.0883	28.7581	15.5075	20.1	17.8639	ENSG00000135631.16	RAB11FIP5	chr2:72942035-73156721	MB231_CTRL	MB231_W2	OK	29.4076	17.8238	-0.722386	-3.60453	5e-05	0.000503098	yes
ENSG00000135637.13	CCDC142	5.06152	4.586	4.66354	10.5492	14.516	10.6831	ENSG00000135637.13	CCDC142	chr2:74471957-74494886	MB231_CTRL	MB231_W2	OK	4.77035	11.9161	1.32074	1.94281	0.0003	0.00245627	yes
ENSG00000135655.14	USP15	11.0334	14.4877	17.4438	17.7814	71.4983	28.2599	ENSG00000135655.14	USP15	chr12:61708258-62417431	MB231_CTRL	MB231_W2	OK	14.3216	39.1799	1.45192	3.42243	5e-05	0.000503098	yes
ENSG00000135677.10	GNS	41.8931	47.544	49.2487	32.7242	33.8643	31.3256	ENSG00000135677.10	GNS	chr12:64713444-64759447	MB231_CTRL	MB231_W2	OK	46.2286	32.638	-0.502231	-2.87859	5e-05	0.000503098	yes
ENSG00000135720.12	DYNC1LI2	19.8794	25.0365	23.7965	47.9902	38.9851	47.3275	ENSG00000135720.12	DYNC1LI2	chr16:66720892-66754740	MB231_CTRL	MB231_W2	OK	22.9041	44.7676	0.966847	2.5019	5e-05	0.000503098	yes
ENSG00000135722.8	FBXL8	1.97441	1.08749	1.4664	8.04034	12.1105	9.84647	ENSG00000135722.8	FBXL8	chr16:67154179-67169945	MB231_CTRL	MB231_W2	OK	1.50943	9.99909	2.72779	2.02837	5e-05	0.000503098	yes
ENSG00000135723.13	FHOD1	9.75588	10.1135	10.1606	16.115	13.7634	18.5149	ENSG00000135723.13	FHOD1	chr16:67229386-67272190	MB231_CTRL	MB231_W2	OK	10.01	16.1311	0.688408	1.61472	0.005	0.025747	yes
ENSG00000135736.5	CCDC102A	2.98269	3.02921	3.75989	2.31147	1.33072	1.66196	ENSG00000135736.5	CCDC102A	chr16:57512177-57536599	MB231_CTRL	MB231_W2	OK	3.25726	1.76805	-0.881498	-2.33668	5e-05	0.000503098	yes
ENSG00000135766.8	EGLN1	28.1859	30.1713	31.3527	20.8184	20.7577	21.5868	ENSG00000135766.8	EGLN1	chr1:231363750-231425044	MB231_CTRL	MB231_W2	OK	29.9033	21.0543	-0.506189	-3.17557	5e-05	0.000503098	yes
ENSG00000135778.11	NTPCR	11.8767	11.7037	11.8812	15.9703	19.4216	17.0706	ENSG00000135778.11	NTPCR	chr1:232950604-233295727	MB231_CTRL	MB231_W2	OK	11.8205	17.4875	0.56503	1.51814	0.00775	0.0364418	yes
ENSG00000135821.17	GLUL	36.6045	41.3886	37.1356	22.8062	32.9647	23.1722	ENSG00000135821.17	GLUL	chr1:182381703-182392206	MB231_CTRL	MB231_W2	OK	38.3762	26.3143	-0.544363	-1.99126	0.00075	0.00534003	yes
ENSG00000135823.13	STX6	17.238	18.1827	20.2225	11.2722	12.3575	12.0224	ENSG00000135823.13	STX6	chr1:180913153-181023121	MB231_CTRL	MB231_W2	OK	18.5477	11.8841	-0.642217	-2.91507	5e-05	0.000503098	yes
ENSG00000135829.16	DHX9	49.2124	59.9764	57.7458	31.5622	36.5169	39.0339	ENSG00000135829.16	DHX9	chr1:182839368-182887751	MB231_CTRL	MB231_W2	OK	55.6449	35.7043	-0.64015	-1.86939	0.00185	0.0114022	yes
ENSG00000135842.16	FAM129A	20.5939	22.7231	23.6076	12.9901	14.1075	14.7282	ENSG00000135842.16	FAM129A	chr1:184790723-184974550	MB231_CTRL	MB231_W2	OK	22.3082	13.9419	-0.678145	-3.57373	5e-05	0.000503098	yes
ENSG00000135862.5	LAMC1	62.8529	67.4451	62.9568	43.4693	28.6848	41.7677	ENSG00000135862.5	LAMC1	chr1:183023459-183145592	MB231_CTRL	MB231_W2	OK	64.4183	37.9739	-0.76246	-1.54916	0.00815	0.0379314	yes
ENSG00000135900.3	MRPL44	14.7276	15.3535	15.69	8.8506	11.6008	12.8582	ENSG00000135900.3	MRPL44	chr2:223957403-223967714	MB231_CTRL	MB231_W2	OK	15.257	11.1032	-0.4585	-2.00496	0.00055	0.0041207	yes
ENSG00000135912.10	TTLL4	6.6021	8.39413	7.84433	14.9348	13.6625	9.35677	ENSG00000135912.10	TTLL4	chr2:218710844-218755416	MB231_CTRL	MB231_W2	OK	7.61352	12.6513	0.732655	1.41481	0.0029	0.0164807	yes
ENSG00000135916.15	ITM2C	23.6289	28.5228	27.9397	18.1642	20.2012	13.4948	ENSG00000135916.15	ITM2C	chr2:230864638-230879248	MB231_CTRL	MB231_W2	OK	26.6972	17.2867	-0.627022	-2.17857	0.00025	0.00209262	yes
ENSG00000135926.13	TMBIM1	62.7706	59.0508	59.8563	31.2736	30.0582	34.4862	ENSG00000135926.13	TMBIM1	chr2:218270391-218368099	MB231_CTRL	MB231_W2	OK	60.5592	31.9393	-0.923012	-2.8842	5e-05	0.000503098	yes
ENSG00000135945.9	REV1	7.04861	8.55929	9.76162	24.7345	16.1942	20.6332	ENSG00000135945.9	REV1	chr2:98997260-99490035	MB231_CTRL	MB231_W2	OK	8.45651	20.5206	1.27894	1.07748	0.0055	0.0277775	yes
ENSG00000135966.12	TGFBRAP1	12.3313	14.3332	14.4261	7.79901	6.79489	8.03083	ENSG00000135966.12	TGFBRAP1	chr2:105264390-105330529	MB231_CTRL	MB231_W2	OK	13.6968	7.54158	-0.860905	-4.29553	5e-05	0.000503098	yes
ENSG00000135972.8	MRPS9	17.8917	19.5605	18.8757	10.4712	11.7767	12.4661	ENSG00000135972.8	MRPS9	chr2:104936240-105102944	MB231_CTRL	MB231_W2	OK	18.776	11.5713	-0.69833	-3.41425	5e-05	0.000503098	yes
ENSG00000135976.16	ANKRD36	3.01804	2.46643	2.38389	5.51959	5.86773	9.63291	ENSG00000135976.16	ANKRD36	chr2:97113495-97264521	MB231_CTRL	MB231_W2	OK	2.62279	7.00674	1.41764	2.63684	5e-05	0.000503098	yes
ENSG00000136002.17	ARHGEF4	7.83989	8.48355	8.66128	9.2556	14.397	11.8634	ENSG00000136002.17	ARHGEF4	chr2:130830977-131047263	MB231_CTRL	MB231_W2	OK	8.32824	11.8387	0.507424	1.37034	0.00545	0.0275986	yes
ENSG00000136026.13	CKAP4	76.124	85.1647	80.0875	39.6323	44.4977	43.3567	ENSG00000136026.13	CKAP4	chr12:106237876-106347015	MB231_CTRL	MB231_W2	OK	80.4587	42.4956	-0.920936	-5.43046	5e-05	0.000503098	yes
ENSG00000136052.9	SLC41A2	28.2017	36.4277	39.078	19.4511	20.3194	17.5672	ENSG00000136052.9	SLC41A2	chr12:104802552-104958744	MB231_CTRL	MB231_W2	OK	34.5692	19.1126	-0.854965	-2.28618	5e-05	0.000503098	yes
ENSG00000136104.19	RNASEH2B	10.0808	9.19937	10.0816	13.5736	18.0583	17.0777	ENSG00000136104.19	RNASEH2B	chr13:50862171-50973745	MB231_CTRL	MB231_W2	OK	9.78727	16.2365	0.730264	1.38275	0.0022	0.0131607	yes
ENSG00000136111.12	TBC1D4	12.3507	13.548	11.3953	8.39071	4.98116	6.40408	ENSG00000136111.12	TBC1D4	chr13:75284664-75482114	MB231_CTRL	MB231_W2	OK	12.4313	6.59198	-0.915197	-2.64398	5e-05	0.000503098	yes
ENSG00000136146.14	MED4	15.2858	17.4314	19.3324	10.783	14.4944	14.6949	ENSG00000136146.14	MED4	chr13:48053322-48095131	MB231_CTRL	MB231_W2	OK	17.3499	13.3241	-0.380885	-1.62397	0.00495	0.0255452	yes
ENSG00000136147.17	PHF11	10.4139	11.2253	9.18125	18.7017	18.556	20.1815	ENSG00000136147.17	PHF11	chr13:49495609-49528987	MB231_CTRL	MB231_W2	OK	10.2735	19.1464	0.898145	2.43459	5e-05	0.000503098	yes
ENSG00000136158.11	SPRY2	25.11	25.5562	22.7752	25.4812	36.1138	41.6804	ENSG00000136158.11	SPRY2	chr13:80335975-80340951	MB231_CTRL	MB231_W2	OK	24.4805	34.4251	0.491829	2.73312	5e-05	0.000503098	yes
ENSG00000136193.16	SCRN1	60.0304	63.9358	64.0663	35.9652	36.226	41.1463	ENSG00000136193.16	SCRN1	chr7:29920102-30026684	MB231_CTRL	MB231_W2	OK	62.6775	37.7791	-0.730357	-4.12046	5e-05	0.000503098	yes
ENSG00000136231.13	IGF2BP3	16.0856	19.1088	15.2752	25.4781	26.3138	26.525	ENSG00000136231.13	IGF2BP3	chr7:23298738-23470467	MB231_CTRL	MB231_W2	OK	16.8232	26.1056	0.633908	1.65678	0.00225	0.0134005	yes
ENSG00000136238.17	RAC1	157.523	179.282	172.659	129.972	127.377	135.878	ENSG00000136238.17	RAC1	chr7:6374522-6403977	MB231_CTRL	MB231_W2	OK	169.822	131.076	-0.373619	-2.15345	0.0004	0.00314441	yes
ENSG00000136243.16	NUPL2	12.7052	16.3608	14.7762	19.5772	23.1548	23.6044	ENSG00000136243.16	NUPL2	chr7:23181826-23201011	MB231_CTRL	MB231_W2	OK	14.6141	22.1121	0.597481	1.78344	0.0006	0.00442867	yes
ENSG00000136261.14	BZW2	23.9155	24.1637	27.9935	14.6502	21.5686	20.15	ENSG00000136261.14	BZW2	chr7:16646130-16719898	MB231_CTRL	MB231_W2	OK	25.3576	18.7896	-0.432481	-2.17884	0.0002	0.00172918	yes
ENSG00000136280.15	CCM2	19.7398	18.4767	17.4649	10.863	12.6592	9.27105	ENSG00000136280.15	CCM2	chr7:44999474-45076469	MB231_CTRL	MB231_W2	OK	18.5605	10.9311	-0.763798	-2.52626	5e-05	0.000503098	yes
ENSG00000136319.11	TTC5	2.38964	2.89141	3.99002	5.07839	4.55581	5.30473	ENSG00000136319.11	TTC5	chr14:20256557-20306811	MB231_CTRL	MB231_W2	OK	3.09036	4.97964	0.688269	1.2933	0.00705	0.0337927	yes
ENSG00000136379.11	ABHD17C	26.5887	31.9723	34.9126	23.3716	24.0111	28.3245	ENSG00000136379.11	ABHD17C	chr15:80679683-80755621	MB231_CTRL	MB231_W2	OK	31.1579	25.2357	-0.30413	-1.46238	0.011	0.0479798	yes
ENSG00000136444.9	RSAD1	7.60027	10.8874	8.08876	14.8766	21.0759	16.844	ENSG00000136444.9	RSAD1	chr17:50478799-50485975	MB231_CTRL	MB231_W2	OK	8.85881	17.5988	0.990293	2.82421	5e-05	0.000503098	yes
ENSG00000136478.7	TEX2	16.3615	18.5146	19.2202	13.4802	12.5852	14.8249	ENSG00000136478.7	TEX2	chr17:64147226-64263301	MB231_CTRL	MB231_W2	OK	18.0321	13.6301	-0.403769	-1.84396	0.0011	0.00740172	yes
ENSG00000136485.14	DCAF7	53.0351	49.8445	52.1389	36.2815	38.9638	38.3673	ENSG00000136485.14	DCAF7	chr17:63550460-63594266	MB231_CTRL	MB231_W2	OK	51.6728	37.8709	-0.448317	-1.70658	0.00245	0.0143789	yes
ENSG00000136521.12	NDUFB5	42.289	46.215	46.6796	65.3018	93.4224	80.4043	ENSG00000136521.12	NDUFB5	chr3:179604689-179627647	MB231_CTRL	MB231_W2	OK	45.0612	79.7095	0.822866	3.97001	5e-05	0.000503098	yes
ENSG00000136542.8	GALNT5	6.45843	7.84236	7.32048	4.02302	4.99952	4.75423	ENSG00000136542.8	GALNT5	chr2:157257597-157314211	MB231_CTRL	MB231_W2	OK	7.20709	4.59226	-0.650214	-2.35413	5e-05	0.000503098	yes
ENSG00000136628.17	EPRS	42.3619	43.2467	48.1416	19.7493	20.0818	20.3645	ENSG00000136628.17	EPRS	chr1:219968600-220046658	MB231_CTRL	MB231_W2	OK	44.5834	20.0652	-1.15181	-5.40348	5e-05	0.000503098	yes
ENSG00000136682.14	CBWD2	6.07716	5.30119	4.6931	11.3923	8.39207	9.83113	ENSG00000136682.14	CBWD2	chr2:113437690-113496189	MB231_CTRL	MB231_W2	OK	5.35715	9.87184	0.881853	1.64253	0.00255	0.014853	yes
ENSG00000136715.17	SAP130	19.277	18.5071	17.3299	11.7417	12.583	12.5126	ENSG00000136715.17	SAP130	chr2:127941216-128028120	MB231_CTRL	MB231_W2	OK	18.3713	12.2791	-0.581252	-2.41763	5e-05	0.000503098	yes
ENSG00000136717.14	BIN1	26.0815	27.7204	24.8722	13.1684	21.1922	18.6655	ENSG00000136717.14	BIN1	chr2:127048026-127107355	MB231_CTRL	MB231_W2	OK	26.2247	17.6754	-0.569186	-3.08805	5e-05	0.000503098	yes
ENSG00000136720.6	HS6ST1	9.8447	11.2696	10.5793	6.13441	6.59059	4.34926	ENSG00000136720.6	HS6ST1	chr2:128236715-128318577	MB231_CTRL	MB231_W2	OK	10.5645	5.69142	-0.892366	-2.40645	5e-05	0.000503098	yes
ENSG00000136731.12	UGGT1	14.1998	15.5376	15.6441	8.58525	8.94952	7.6044	ENSG00000136731.12	UGGT1	chr2:128091199-128195677	MB231_CTRL	MB231_W2	OK	15.1272	8.37972	-0.852166	-2.18778	0.0002	0.00172918	yes
ENSG00000136783.9	NIPSNAP3A	13.2213	13.8347	14.4671	21.8053	18.7816	21.1407	ENSG00000136783.9	NIPSNAP3A	chr9:104747687-104760122	MB231_CTRL	MB231_W2	OK	13.841	20.5759	0.572005	2.22831	0.00015	0.00134259	yes
ENSG00000136802.11	LRRC8A	52.0213	52.6499	53.5166	30.7471	32.6457	36.246	ENSG00000136802.11	LRRC8A	chr9:128832941-128918039	MB231_CTRL	MB231_W2	OK	52.7292	33.2129	-0.666858	-3.25888	5e-05	0.000503098	yes
ENSG00000136807.12	CDK9	28.3154	31.136	30.3554	105.078	26.48	25.559	ENSG00000136807.12	CDK9	chr9:127785678-127790787	MB231_CTRL	MB231_W2	OK	29.9356	52.3722	0.806939	2.9137	0.00045	0.00346901	yes
ENSG00000136810.12	TXN	346.368	373.481	376.979	463.883	483.192	537.104	ENSG00000136810.12	TXN	chr9:110243810-110256640	MB231_CTRL	MB231_W2	OK	365.609	494.726	0.436328	2.66689	5e-05	0.000503098	yes
ENSG00000136811.16	ODF2	9.47478	11.5523	11.3681	14.9737	16.2396	18.7474	ENSG00000136811.16	ODF2	chr9:128455185-128501292	MB231_CTRL	MB231_W2	OK	10.7984	16.6536	0.625015	2.14739	0.00015	0.00134259	yes
ENSG00000136813.14	KIAA0368	48.8685	52.3135	52.6759	26.7298	35.2582	33.8609	ENSG00000136813.14	KIAA0368	chr9:111360691-111484745	MB231_CTRL	MB231_W2	OK	51.286	31.9496	-0.682765	-2.29177	5e-05	0.000503098	yes
ENSG00000136816.15	TOR1B	35.5812	34.4723	44.4654	23.0788	25.4376	22.9136	ENSG00000136816.15	TOR1B	chr9:129803152-129811281	MB231_CTRL	MB231_W2	OK	38.173	23.81	-0.680984	-1.97198	0.00065	0.00473038	yes
ENSG00000136819.15	C9orf78	28.7233	28.7728	33.0717	18.1561	18.6804	15.8415	ENSG00000136819.15	C9orf78	chr9:129827289-129881838	MB231_CTRL	MB231_W2	OK	30.1893	17.5594	-0.781795	-3.15598	5e-05	0.000503098	yes
ENSG00000136824.18	SMC2	19.0052	23.1097	22.9223	17.074	13.9145	14.3795	ENSG00000136824.18	SMC2	chr9:104094259-104141417	MB231_CTRL	MB231_W2	OK	21.6791	15.1226	-0.519593	-2.62532	5e-05	0.000503098	yes
ENSG00000136827.11	TOR1A	24.1137	25.1115	26.742	29.9226	29.0345	34.3699	ENSG00000136827.11	TOR1A	chr9:129812943-129824134	MB231_CTRL	MB231_W2	OK	25.3224	31.109	0.296917	1.56925	0.00635	0.031079	yes
ENSG00000136830.11	FAM129B	263.383	297.676	270.379	145.853	173.067	184.353	ENSG00000136830.11	FAM129B	chr9:127505338-127578989	MB231_CTRL	MB231_W2	OK	277.146	167.758	-0.724264	-3.05468	5e-05	0.000503098	yes
ENSG00000136848.16	DAB2IP	20.4223	22.2858	21.9074	9.35826	11.0798	10.7011	ENSG00000136848.16	DAB2IP	chr9:121567056-121785530	MB231_CTRL	MB231_W2	OK	21.5385	10.3797	-1.05315	-4.77748	5e-05	0.000503098	yes
ENSG00000136859.9	ANGPTL2	16.6433	17.4492	14.0458	4.54398	5.49581	7.70491	ENSG00000136859.9	ANGPTL2	chr9:126914773-127223166	MB231_CTRL	MB231_W2	OK	16.0461	5.9149	-1.4398	-2.78408	5e-05	0.000503098	yes
ENSG00000136869.13	TLR4	2.01924	2.90873	3.19536	5.75971	5.52633	7.93713	ENSG00000136869.13	TLR4	chr9:117704331-117716871	MB231_CTRL	MB231_W2	OK	2.70778	6.40772	1.2427	2.7355	5e-05	0.000503098	yes
ENSG00000136875.12	PRPF4	28.4187	30.6967	31.674	20.1862	20.7866	24.7785	ENSG00000136875.12	PRPF4	chr9:113221561-113292905	MB231_CTRL	MB231_W2	OK	30.2631	21.9171	-0.465505	-1.77688	0.0019	0.0116365	yes
ENSG00000136888.6	ATP6V1G1	47.2676	48.6717	56.9846	64.7055	85.4532	80.8152	ENSG00000136888.6	ATP6V1G1	chr9:114587745-114598373	MB231_CTRL	MB231_W2	OK	50.9746	76.9913	0.594916	3.38334	5e-05	0.000503098	yes
ENSG00000136897.7	MRPL50	18.2679	17.5219	22.0074	24.4715	24.968	21.1709	ENSG00000136897.7	MRPL50	chr9:101387632-101398614	MB231_CTRL	MB231_W2	OK	19.2657	23.5368	0.288883	1.65328	0.0041	0.0218807	yes
ENSG00000136925.14	TSTD2	7.2802	8.26677	8.78054	8.18832	10.8051	12.5863	ENSG00000136925.14	TSTD2	chr9:97501179-97633575	MB231_CTRL	MB231_W2	OK	8.10917	10.5266	0.376408	1.38034	0.01035	0.045719	yes
ENSG00000136930.12	PSMB7	138.879	149.606	133.25	79.7997	96.121	74.5509	ENSG00000136930.12	PSMB7	chr9:124353465-124415444	MB231_CTRL	MB231_W2	OK	140.578	83.4905	-0.751689	-4.06373	5e-05	0.000503098	yes
ENSG00000136940.13	PDCL	16.8911	17.2027	17.2508	11.4673	9.45074	10.7364	ENSG00000136940.13	PDCL	chr9:122798388-122828631	MB231_CTRL	MB231_W2	OK	17.1149	10.5515	-0.697806	-3.46796	5e-05	0.000503098	yes
ENSG00000136943.10	CTSV	2.44397	2.43059	2.27583	1.01463	1.67466	1.21392	ENSG00000136943.10	CTSV	chr9:97029678-97039643	MB231_CTRL	MB231_W2	OK	2.38346	1.30107	-0.873361	-1.42596	0.00635	0.031079	yes
ENSG00000136950.13	ARPC5L	50.5409	55.7115	57.2305	38.1465	41.1966	43.3193	ENSG00000136950.13	ARPC5L	chr9:124862129-124877733	MB231_CTRL	MB231_W2	OK	54.4943	40.8875	-0.414447	-2.40588	5e-05	0.000503098	yes
ENSG00000136986.9	DERL1	43.256	43.1786	43.3228	31.1513	35.0223	31.4244	ENSG00000136986.9	DERL1	chr8:123002559-123152153	MB231_CTRL	MB231_W2	OK	43.2525	32.5327	-0.410894	-1.60816	0.00575	0.0287713	yes
ENSG00000136997.15	MYC	113.769	119.18	107.579	66.6527	73.6258	80.3244	ENSG00000136997.15	MYC	chr8:127735433-127741434	MB231_CTRL	MB231_W2	OK	113.509	73.5343	-0.626324	-2.8829	5e-05	0.000503098	yes
ENSG00000137054.15	POLR1E	14.8159	16.2773	15.1145	9.61305	11.5866	11.3119	ENSG00000137054.15	POLR1E	chr9:37485934-37503697	MB231_CTRL	MB231_W2	OK	15.4026	10.8372	-0.507185	-2.47451	5e-05	0.000503098	yes
ENSG00000137055.14	PLAA	40.9096	42.8347	46.1564	20.3903	21.1287	31.9633	ENSG00000137055.14	PLAA	chr9:26904082-27062930	MB231_CTRL	MB231_W2	OK	43.3003	24.4941	-0.821941	-2.34158	0.00015	0.00134259	yes
ENSG00000137070.17	IL11RA	0.538264	0.234162	0.773895	1.35666	2.57234	3.26842	ENSG00000137070.17	IL11RA	chr9:34638132-34681298	MB231_CTRL	MB231_W2	OK	0.51544	2.39914	2.21864	0.635937	5e-05	0.000503098	yes
ENSG00000137076.19	TLN1	68.5328	85.689	84.6183	45.6166	52.8366	43.5898	ENSG00000137076.19	TLN1	chr9:35696947-35749228	MB231_CTRL	MB231_W2	OK	79.6133	47.3477	-0.749717	-1.38962	0.0011	0.00740172	yes
ENSG00000137100.15	DCTN3	35.939	33.0422	27.325	33.8832	52.6639	47.8378	ENSG00000137100.15	DCTN3	chr9:34613544-34620523	MB231_CTRL	MB231_W2	OK	32.102	44.7949	0.480671	1.92676	0.00075	0.00534003	yes
ENSG00000137106.17	GRHPR	24.2008	31.604	25.613	34.274	36.1879	43.3371	ENSG00000137106.17	GRHPR	chr9:37422665-37436990	MB231_CTRL	MB231_W2	OK	27.1393	37.933	0.483071	1.9583	0.00095	0.00654723	yes
ENSG00000137124.7	ALDH1B1	27.1053	28.5232	25.8663	11.5238	18.5254	15.2378	ENSG00000137124.7	ALDH1B1	chr9:38392663-38398661	MB231_CTRL	MB231_W2	OK	27.1649	15.0957	-0.84761	-3.78736	5e-05	0.000503098	yes
ENSG00000137154.12	RPS6	451.187	509.09	522.307	615.318	724.3	759.167	ENSG00000137154.12	RPS6	chr9:19375450-19380254	MB231_CTRL	MB231_W2	OK	494.195	699.595	0.501441	2.87429	5e-05	0.000503098	yes
ENSG00000137161.16	CNPY3	29.3307	35.4081	37.4691	24.2199	25.7253	32.149	ENSG00000137161.16	CNPY3	chr6:42929191-42939287	MB231_CTRL	MB231_W2	OK	34.0693	27.3647	-0.316155	-1.48566	0.0099	0.0441799	yes
ENSG00000137166.14	FOXP4	51.4193	51.7046	47.7127	30.0083	47.961	33.1993	ENSG00000137166.14	FOXP4	chr6:41494852-41602384	MB231_CTRL	MB231_W2	OK	50.2789	37.0562	-0.440237	-2.16041	0.00015	0.00134259	yes
ENSG00000137168.7	PPIL1	97.9513	112.83	111.046	126.728	152.686	156.001	ENSG00000137168.7	PPIL1	chr6:36854826-36928964	MB231_CTRL	MB231_W2	OK	107.276	145.138	0.436106	1.9359	0.00055	0.0041207	yes
ENSG00000137171.14	KLC4	7.06417	7.35097	5.11863	14.1668	15.3577	13.0861	ENSG00000137171.14	KLC4	chr6:43037616-43075099	MB231_CTRL	MB231_W2	OK	6.51126	14.2036	1.12524	1.63353	0.0008	0.00564084	yes
ENSG00000137177.19	KIF13A	21.5491	21.8684	24.7264	12.855	16.3314	16.2654	ENSG00000137177.19	KIF13A	chr6:17759182-17987623	MB231_CTRL	MB231_W2	OK	22.7146	15.1506	-0.58425	-1.75899	0.0009	0.00624357	yes
ENSG00000137185.11	ZSCAN9	4.37314	5.29134	5.52457	11.274	14.0942	11.3393	ENSG00000137185.11	ZSCAN9	chr6:28224885-28233482	MB231_CTRL	MB231_W2	OK	5.06302	12.2358	1.27304	3.72653	5e-05	0.000503098	yes
ENSG00000137198.9	GMPR	11.7721	13.06	12.3897	7.22763	6.6403	6.54743	ENSG00000137198.9	GMPR	chr6:16238579-16295549	MB231_CTRL	MB231_W2	OK	12.4073	6.80512	-0.866491	-2.77932	5e-05	0.000503098	yes
ENSG00000137200.12	CMTR1	23.1478	27.477	25.2366	28.8756	42.4265	45.491	ENSG00000137200.12	CMTR1	chr6:37433218-37482827	MB231_CTRL	MB231_W2	OK	25.2871	38.931	0.622518	2.39951	5e-05	0.000503098	yes
ENSG00000137203.10	TFAP2A	8.59299	7.45597	6.34091	13.5985	11.5551	10.6972	ENSG00000137203.10	TFAP2A	chr6:10393185-10419659	MB231_CTRL	MB231_W2	OK	7.46329	11.9502	0.679154	1.23934	0.00955	0.042983	yes
ENSG00000137207.11	YIPF3	80.0941	95.7225	85.2442	55.6935	71.4374	58.8532	ENSG00000137207.11	YIPF3	chr6:43506968-43576075	MB231_CTRL	MB231_W2	OK	87.0203	61.9947	-0.489207	-1.46162	0.0085	0.0391988	yes
ENSG00000137210.13	TMEM14B	224.077	243.932	223.655	413.779	430.025	468.873	ENSG00000137210.13	TMEM14B	chr6:10747758-10979320	MB231_CTRL	MB231_W2	OK	230.555	437.559	0.924367	5.56074	5e-05	0.000503098	yes
ENSG00000137221.14	TJAP1	12.5134	14.4365	14.7611	19.7614	25.3482	28.6643	ENSG00000137221.14	TJAP1	chr6:43477522-43506556	MB231_CTRL	MB231_W2	OK	13.9037	24.5913	0.82268	3.38608	5e-05	0.000503098	yes
ENSG00000137267.5	TUBB2A	19.9768	20.8166	23.5652	10.3827	9.5353	13.542	ENSG00000137267.5	TUBB2A	chr6:3153668-3157526	MB231_CTRL	MB231_W2	OK	21.4529	11.1533	-0.943695	-3.50364	5e-05	0.000503098	yes
ENSG00000137273.3	FOXF2	13.4329	10.3852	9.94067	5.56947	5.69277	5.79801	ENSG00000137273.3	FOXF2	chr6:1389833-1395597	MB231_CTRL	MB231_W2	OK	11.2529	5.68675	-0.984624	-3.22474	5e-05	0.000503098	yes
ENSG00000137275.13	RIPK1	11.8702	14.4791	13.9941	8.55976	9.43429	12.7331	ENSG00000137275.13	RIPK1	chr6:3063990-3115187	MB231_CTRL	MB231_W2	OK	13.4478	10.2424	-0.392817	-2.24978	5e-05	0.000503098	yes
ENSG00000137309.19	HMGA1	563.017	632.745	626.559	411.451	495.286	488.538	ENSG00000137309.19	HMGA1	chr6:34236872-34246231	MB231_CTRL	MB231_W2	OK	607.44	465.092	-0.385227	-2.42788	0.0001	0.000939965	yes
ENSG00000137331.11	IER3	1014.65	1066.91	1099.71	633.78	692.498	682.908	ENSG00000137331.11	IER3	chr6:30742928-30744554	MB231_CTRL	MB231_W2	OK	1060.43	669.729	-0.662994	-4.14725	5e-05	0.000503098	yes
ENSG00000137337.14	MDC1	26.2532	25.6524	22.505	10.7518	17.3669	13.3299	ENSG00000137337.14	MDC1	chr6:30699806-30717889	MB231_CTRL	MB231_W2	OK	24.8035	13.8162	-0.844182	-1.68185	0.00175	0.0108959	yes
ENSG00000137343.17	ATAT1	4.61863	4.94578	4.9297	11.145	12.8244	12.3083	ENSG00000137343.17	ATAT1	chr6:30626841-30646823	MB231_CTRL	MB231_W2	OK	4.83137	12.0926	1.32362	3.11911	5e-05	0.000503098	yes
ENSG00000137404.14	NRM	31.741	38.2956	35.0198	24.1751	28.4332	22.6216	ENSG00000137404.14	NRM	chr6:30688046-30691420	MB231_CTRL	MB231_W2	OK	35.0188	25.0766	-0.481789	-2.07073	0.00025	0.00209262	yes
ENSG00000137409.19	MTCH1	232.984	243.634	235.835	177.414	203.335	204.872	ENSG00000137409.19	MTCH1	chr6:36968140-36986298	MB231_CTRL	MB231_W2	OK	237.484	195.207	-0.282827	-1.61971	0.00505	0.0259515	yes
ENSG00000137411.16	VARS2	6.61142	6.65711	5.94552	9.74639	12.4881	10.7079	ENSG00000137411.16	VARS2	chr6:30908183-30926459	MB231_CTRL	MB231_W2	OK	6.40468	10.9808	0.777784	1.59904	0.00195	0.0118792	yes
ENSG00000137414.5	FAM8A1	10.0835	11.9424	12.3873	6.62095	7.5652	7.60626	ENSG00000137414.5	FAM8A1	chr6:17600354-17611719	MB231_CTRL	MB231_W2	OK	11.4711	7.26414	-0.659136	-3.109	5e-05	0.000503098	yes
ENSG00000137449.15	CPEB2	10.0329	13.2951	11.0718	5.84824	6.39179	6.83682	ENSG00000137449.15	CPEB2	chr4:15002673-15446166	MB231_CTRL	MB231_W2	OK	11.4666	6.35895	-0.850579	-2.09928	5e-05	0.000503098	yes
ENSG00000137462.6	TLR2	5.29977	6.27216	4.92006	1.98029	3.12834	3.91034	ENSG00000137462.6	TLR2	chr4:153701499-153705699	MB231_CTRL	MB231_W2	OK	5.49733	3.00632	-0.87073	-3.06779	5e-05	0.000503098	yes
ENSG00000137496.17	IL18BP	1.34339	1.09166	1.14593	3.99426	4.04065	3.8246	ENSG00000137496.17	IL18BP	chr11:71998540-72112780	MB231_CTRL	MB231_W2	OK	1.19366	3.95317	1.72762	0.766479	0.00425	0.0225604	yes
ENSG00000137497.17	NUMA1	33.7008	45.6674	47.4325	70.0082	66.061	67.2961	ENSG00000137497.17	NUMA1	chr11:71998540-72112780	MB231_CTRL	MB231_W2	OK	42.2669	67.7885	0.681511	1.42769	0.0045	0.0236453	yes
ENSG00000137504.13	CREBZF	18.3994	17.2701	20.7884	48.392	56.8206	56.2247	ENSG00000137504.13	CREBZF	chr11:85659707-85682908	MB231_CTRL	MB231_W2	OK	18.8193	53.8124	1.51573	7.53707	5e-05	0.000503098	yes
ENSG00000137563.11	GGH	42.0905	46.2707	45.4789	69.9364	95.7913	100.071	ENSG00000137563.11	GGH	chr8:63015078-63039171	MB231_CTRL	MB231_W2	OK	44.6134	88.5996	0.989825	5.4054	5e-05	0.000503098	yes
ENSG00000137575.11	SDCBP	71.7877	75.3299	79.6512	53.2739	68.2125	56.582	ENSG00000137575.11	SDCBP	chr8:58552923-58582860	MB231_CTRL	MB231_W2	OK	75.5896	59.3561	-0.34879	-1.86355	0.0013	0.00851582	yes
ENSG00000137692.11	DCUN1D5	66.8815	66.272	74.0911	46.6439	52.2373	53.6821	ENSG00000137692.11	DCUN1D5	chr11:103062075-103092215	MB231_CTRL	MB231_W2	OK	69.0815	50.8544	-0.441928	-2.3309	5e-05	0.000503098	yes
ENSG00000137693.13	YAP1	53.4883	54.5954	58.9386	38.2368	38.8955	39.2124	ENSG00000137693.13	YAP1	chr11:102110460-102233423	MB231_CTRL	MB231_W2	OK	55.6741	38.7815	-0.521635	-2.71689	5e-05	0.000503098	yes
ENSG00000137699.16	TRIM29	10.4567	13.3532	9.34976	3.41801	5.56345	4.97587	ENSG00000137699.16	TRIM29	chr11:120111274-120185529	MB231_CTRL	MB231_W2	OK	11.0532	4.65244	-1.2484	-1.77355	5e-05	0.000503098	yes
ENSG00000137802.13	MAPKBP1	3.89811	3.32434	4.08868	7.31109	6.6885	9.97339	ENSG00000137802.13	MAPKBP1	chr15:41774433-41827936	MB231_CTRL	MB231_W2	OK	3.77038	7.991	1.08367	1.14343	0.0017	0.0106371	yes
ENSG00000137804.12	NUSAP1	75.8861	83.2844	86.4116	91.2558	138.695	123.506	ENSG00000137804.12	NUSAP1	chr15:41332693-41381050	MB231_CTRL	MB231_W2	OK	81.8607	117.819	0.525329	1.86333	0.0012	0.00797254	yes
ENSG00000137807.13	KIF23	24.1358	26.9255	23.2618	37.7367	44.4211	44.7503	ENSG00000137807.13	KIF23	chr15:69298946-69448427	MB231_CTRL	MB231_W2	OK	24.7743	42.3027	0.771904	2.68403	5e-05	0.000503098	yes
ENSG00000137817.16	PARP6	15.0456	15.4835	15.1449	25.5758	28.1373	23.8569	ENSG00000137817.16	PARP6	chr15:72241180-72378788	MB231_CTRL	MB231_W2	OK	15.2247	25.8567	0.764128	1.90549	0.0005	0.00379645	yes
ENSG00000137818.11	RPLP1	748.227	793.132	743.367	852.042	1025.94	1060.38	ENSG00000137818.11	RPLP1	chr15:69452783-69456194	MB231_CTRL	MB231_W2	OK	761.575	979.455	0.362993	1.72293	0.0029	0.0164807	yes
ENSG00000137845.14	ADAM10	166.119	151.181	150.776	85.0809	87.85	96.7958	ENSG00000137845.14	ADAM10	chr15:58587506-58749978	MB231_CTRL	MB231_W2	OK	156.026	89.9089	-0.795246	-2.59799	5e-05	0.000503098	yes
ENSG00000137871.19	ZNF280D	5.02619	5.66488	7.04989	12.8605	13.0976	12.8612	ENSG00000137871.19	ZNF280D	chr15:56630180-56918571	MB231_CTRL	MB231_W2	OK	5.91365	12.9398	1.12969	2.43054	5e-05	0.000503098	yes
ENSG00000137876.9	RSL24D1	28.5965	30.1139	31.3634	50.7074	61.2084	55.0027	ENSG00000137876.9	RSL24D1	chr15:55180805-55197067	MB231_CTRL	MB231_W2	OK	30.0246	55.6395	0.889965	3.62152	5e-05	0.000503098	yes
ENSG00000137947.11	GTF2B	14.2645	13.2822	13.5808	14.8519	20.3637	18.0223	ENSG00000137947.11	GTF2B	chr1:88852931-88891944	MB231_CTRL	MB231_W2	OK	13.7092	17.746	0.372349	1.39991	0.00995	0.0443821	yes
ENSG00000137955.15	RABGGTB	34.8278	40.4014	39.2946	92.7366	99.6782	106.382	ENSG00000137955.15	RABGGTB	chr1:75724346-75795079	MB231_CTRL	MB231_W2	OK	38.1746	99.5988	1.38352	5.05912	5e-05	0.000503098	yes
ENSG00000137965.10	IFI44	16.3218	16.1087	17.8493	26.2889	18.879	26.9026	ENSG00000137965.10	IFI44	chr1:78649795-78664078	MB231_CTRL	MB231_W2	OK	16.76	24.0235	0.519427	1.4871	0.01105	0.0481702	yes
ENSG00000138030.12	KHK	3.14129	2.97199	4.31089	2.17109	0.444472	1.35515	ENSG00000138030.12	KHK	chr2:27086746-27119115	MB231_CTRL	MB231_W2	OK	3.47472	1.32357	-1.39246	-1.84385	5e-05	0.000503098	yes
ENSG00000138032.20	PPM1B	21.6514	23.9794	19.4511	15.3961	18.3503	16.4677	ENSG00000138032.20	PPM1B	chr2:44167624-44244384	MB231_CTRL	MB231_W2	OK	21.694	16.7381	-0.374161	-1.49598	0.0088	0.0402439	yes
ENSG00000138069.16	RAB1A	72.9494	83.6319	76.8605	49.5192	50.0967	52.1657	ENSG00000138069.16	RAB1A	chr2:65056365-65130106	MB231_CTRL	MB231_W2	OK	77.8139	50.5938	-0.621067	-3.45106	5e-05	0.000503098	yes
ENSG00000138071.13	ACTR2	85.5702	90.1625	88.6526	53.6342	49.966	49.0356	ENSG00000138071.13	ACTR2	chr2:65227752-65271253	MB231_CTRL	MB231_W2	OK	88.1284	50.8786	-0.792549	-4.7458	5e-05	0.000503098	yes
ENSG00000138095.18	LRPPRC	76.4002	93.0897	86.8916	51.6978	52.6153	42.9712	ENSG00000138095.18	LRPPRC	chr2:43886507-43996005	MB231_CTRL	MB231_W2	OK	85.4605	49.0948	-0.799689	-2.80483	5e-05	0.000503098	yes
ENSG00000138107.12	ACTR1A	56.65	53.5518	62.0633	31.9369	39.2968	37.5124	ENSG00000138107.12	ACTR1A	chr10:102461394-102502711	MB231_CTRL	MB231_W2	OK	57.4217	36.2487	-0.663667	-3.63291	5e-05	0.000503098	yes
ENSG00000138119.16	MYOF	102.459	112.206	121.261	68.8015	70.67	74.0833	ENSG00000138119.16	MYOF	chr10:93306428-93482317	MB231_CTRL	MB231_W2	OK	111.976	71.185	-0.653539	-2.82853	5e-05	0.000503098	yes
ENSG00000138131.3	LOXL4	16.8595	19.3245	16.3286	6.27062	7.9356	9.39752	ENSG00000138131.3	LOXL4	chr10:98247689-98268250	MB231_CTRL	MB231_W2	OK	17.5042	7.86791	-1.15365	-6.11185	5e-05	0.000503098	yes
ENSG00000138160.5	KIF11	25.8558	28.1955	29.6651	21.006	21.5051	20.6242	ENSG00000138160.5	KIF11	chr10:92593285-92655395	MB231_CTRL	MB231_W2	OK	27.9055	21.0451	-0.407065	-2.54723	5e-05	0.000503098	yes
ENSG00000138166.5	DUSP5	26.1841	30.048	25.8506	16.5069	21.0063	17.0976	ENSG00000138166.5	DUSP5	chr10:110497837-110511544	MB231_CTRL	MB231_W2	OK	27.3609	18.2036	-0.587894	-3.19204	5e-05	0.000503098	yes
ENSG00000138172.10	CALHM2	11.3023	10.6596	10.6622	5.98848	9.39317	7.6418	ENSG00000138172.10	CALHM2	chr10:103446785-103452402	MB231_CTRL	MB231_W2	OK	10.8747	7.67448	-0.502833	-1.50912	0.00575	0.0287713	yes
ENSG00000138279.15	ANXA7	68.1145	74.1641	75.7613	52.6853	66.6661	56.7918	ENSG00000138279.15	ANXA7	chr10:73375100-73414076	MB231_CTRL	MB231_W2	OK	72.68	58.7144	-0.307844	-1.70678	0.00385	0.0207484	yes
ENSG00000138346.14	DNA2	8.76523	11.2862	10.0837	19.136	15.0908	16.4099	ENSG00000138346.14	DNA2	chr10:68414063-68472121	MB231_CTRL	MB231_W2	OK	10.0451	16.8789	0.748734	1.97765	0.0004	0.00314441	yes
ENSG00000138363.14	ATIC	32.2848	40.9213	46.8894	25.1775	29.3767	25.3436	ENSG00000138363.14	ATIC	chr2:215311816-215349773	MB231_CTRL	MB231_W2	OK	40.0318	26.6326	-0.587953	-1.76588	0.00145	0.00933362	yes
ENSG00000138376.10	BARD1	13.8959	14.571	18.879	22.6913	22.5638	24.4622	ENSG00000138376.10	BARD1	chr2:214725645-214809711	MB231_CTRL	MB231_W2	OK	15.782	23.2391	0.558278	1.31315	0.0076	0.0359104	yes
ENSG00000138380.17	CARF	0.280676	0.42099	0.531921	1.78325	2.09155	1.83125	ENSG00000138380.17	CARF	chr2:202874781-203014798	MB231_CTRL	MB231_W2	OK	0.411196	1.90201	2.20963	0.564434	5e-05	0.000503098	yes
ENSG00000138395.14	CDK15	1.35877	1.14314	0.806377	2.65469	1.55703	4.79168	ENSG00000138395.14	CDK15	chr2:201790460-201895550	MB231_CTRL	MB231_W2	OK	1.10276	3.00113	1.44438	0.940959	0.0036	0.0196502	yes
ENSG00000138399.17	FASTKD1	4.42141	6.0672	5.73974	11.579	7.6883	15.5728	ENSG00000138399.17	FASTKD1	chr2:169529748-169573875	MB231_CTRL	MB231_W2	OK	5.40945	11.6133	1.10223	1.84893	0.00015	0.00134259	yes
ENSG00000138413.13	IDH1	14.6704	12.2668	11.7585	5.68989	7.2091	6.53078	ENSG00000138413.13	IDH1	chr2:208236226-208266074	MB231_CTRL	MB231_W2	OK	12.8986	6.47659	-0.993905	-3.06453	5e-05	0.000503098	yes
ENSG00000138430.15	OLA1	128.663	144.909	143.847	97.9001	122.201	106.945	ENSG00000138430.15	OLA1	chr2:174072446-174248698	MB231_CTRL	MB231_W2	OK	139.14	109.015	-0.352004	-2.05399	0.0003	0.00245627	yes
ENSG00000138448.11	ITGAV	32.1564	33.552	37.0527	14.7681	20.9232	17.4871	ENSG00000138448.11	ITGAV	chr2:186590064-186765965	MB231_CTRL	MB231_W2	OK	34.2537	17.7262	-0.950378	-3.44512	5e-05	0.000503098	yes
ENSG00000138463.8	DIRC2	10.8863	9.57466	11.7365	6.64287	4.83792	7.83284	ENSG00000138463.8	DIRC2	chr3:122794794-122881139	MB231_CTRL	MB231_W2	OK	10.7325	6.43787	-0.737329	-2.08207	0.00115	0.00769031	yes
ENSG00000138468.15	SENP7	2.27022	2.83784	4.01354	6.38351	5.44398	9.86028	ENSG00000138468.15	SENP7	chr3:101324204-101513241	MB231_CTRL	MB231_W2	OK	3.04054	7.22925	1.24952	2.62557	5e-05	0.000503098	yes
ENSG00000138495.6	COX17	35.052	37.9748	32.3747	53.9538	65.351	79.8184	ENSG00000138495.6	COX17	chr3:119636456-119677454	MB231_CTRL	MB231_W2	OK	35.1338	66.3744	0.917767	4.36843	5e-05	0.000503098	yes
ENSG00000138594.13	TMOD3	34.7082	36.2626	38.0478	23.6514	23.4398	20.1172	ENSG00000138594.13	TMOD3	chr15:51829627-52100523	MB231_CTRL	MB231_W2	OK	36.3395	22.4028	-0.697861	-2.03074	5e-05	0.000503098	yes
ENSG00000138623.9	SEMA7A	22.0107	23.0275	20.2381	11.9192	16.6713	14.1626	ENSG00000138623.9	SEMA7A	chr15:74409288-74434467	MB231_CTRL	MB231_W2	OK	21.7588	14.251	-0.610535	-2.40984	5e-05	0.000503098	yes
ENSG00000138629.15	UBL7	17.8843	23.1866	16.2444	15.0914	12.1173	11.4053	ENSG00000138629.15	UBL7	chr15:74445976-74461182	MB231_CTRL	MB231_W2	OK	19.1051	12.8713	-0.5698	-1.81872	0.0006	0.00442867	yes
ENSG00000138646.8	HERC5	8.82386	9.84095	10.4882	7.22288	4.91269	5.64011	ENSG00000138646.8	HERC5	chr4:88457116-88506163	MB231_CTRL	MB231_W2	OK	9.71767	5.92523	-0.71374	-2.45694	0.0001	0.000939965	yes
ENSG00000138658.15	ZGRF1	5.54111	7.27933	7.40178	17.2939	12.2129	15.7959	ENSG00000138658.15	ZGRF1	chr4:112513515-112657592	MB231_CTRL	MB231_W2	OK	6.74074	15.1009	1.16365	2.76381	5e-05	0.000503098	yes
ENSG00000138675.16	FGF5	1.29188	1.11733	1.98332	3.06892	7.49022	5.54182	ENSG00000138675.16	FGF5	chr4:80266598-80963756	MB231_CTRL	MB231_W2	OK	1.46418	5.36698	1.87402	1.79133	5e-05	0.000503098	yes
ENSG00000138738.10	PRDM5	8.54089	7.91854	8.80684	21.6715	15.5426	15.3839	ENSG00000138738.10	PRDM5	chr4:120684918-120922870	MB231_CTRL	MB231_W2	OK	8.42209	17.5327	1.0578	2.258	0.0001	0.000939965	yes
ENSG00000138757.14	G3BP2	94.6713	98.4384	105.095	67.5697	65.7295	81.4186	ENSG00000138757.14	G3BP2	chr4:75642781-75724525	MB231_CTRL	MB231_W2	OK	99.4015	71.5726	-0.473861	-1.58625	0.00255	0.014853	yes
ENSG00000138758.11	44450	49.0165	56.5435	59.6003	33.875	35.5551	38.895	ENSG00000138758.11	44450	chr4:76949702-77040384	MB231_CTRL	MB231_W2	OK	55.0535	36.1084	-0.608501	-2.32379	5e-05	0.000503098	yes
ENSG00000138759.17	FRAS1	3.07294	4.56829	4.02412	1.53427	2.00654	3.15051	ENSG00000138759.17	FRAS1	chr4:78057569-78544269	MB231_CTRL	MB231_W2	OK	3.88845	2.23044	-0.801867	-1.43968	0.00675	0.0325817	yes
ENSG00000138760.8	SCARB2	34.9659	41.6949	41.2644	28.0715	31.895	26.9315	ENSG00000138760.8	SCARB2	chr4:76158736-76213893	MB231_CTRL	MB231_W2	OK	39.3084	28.966	-0.440477	-1.86028	0.0029	0.0164807	yes
ENSG00000138767.12	CNOT6L	13.7218	15.5251	15.3004	10.3868	8.49315	9.38057	ENSG00000138767.12	CNOT6L	chr4:77713386-77819615	MB231_CTRL	MB231_W2	OK	14.8491	9.42019	-0.656547	-2.12144	0.00015	0.00134259	yes
ENSG00000138768.14	USO1	15.1257	17.1277	18.3102	10.9278	10.2337	11.3427	ENSG00000138768.14	USO1	chr4:75724592-75814286	MB231_CTRL	MB231_W2	OK	16.8545	10.8347	-0.637471	-2.51002	5e-05	0.000503098	yes
ENSG00000138771.14	SHROOM3	25.5115	23.4355	22.7954	13.5934	16.5585	14.0939	ENSG00000138771.14	SHROOM3	chr4:76435099-76801964	MB231_CTRL	MB231_W2	OK	23.9141	14.7486	-0.697286	-1.65476	0.00235	0.0138868	yes
ENSG00000138795.9	LEF1	1.41765	1.25699	2.46751	4.41435	3.53244	3.69898	ENSG00000138795.9	LEF1	chr4:108047544-108256836	MB231_CTRL	MB231_W2	OK	1.71405	3.88192	1.17936	0.919735	0.00235	0.0138868	yes
ENSG00000138801.8	PAPSS1	19.0028	19.1868	22.6533	13.323	13.1142	16.3362	ENSG00000138801.8	PAPSS1	chr4:107590275-107720452	MB231_CTRL	MB231_W2	OK	20.281	14.2578	-0.508376	-1.33073	0.01035	0.045719	yes
ENSG00000138802.11	SEC24B	15.299	18.6378	18.1821	14.9318	11.8725	11.1363	ENSG00000138802.11	SEC24B	chr4:109347474-109540896	MB231_CTRL	MB231_W2	OK	17.373	12.6469	-0.458063	-2.39712	5e-05	0.000503098	yes
ENSG00000138814.16	PPP3CA	84.9491	105.607	132.934	55.3139	57.9046	64.0579	ENSG00000138814.16	PPP3CA	chr4:101023408-101348883	MB231_CTRL	MB231_W2	OK	107.83	59.0921	-0.86772	-2.60898	5e-05	0.000503098	yes
ENSG00000138834.12	MAPK8IP3	3.96153	4.31145	4.62773	28.3382	25.7356	27.55	ENSG00000138834.12	MAPK8IP3	chr16:1706182-1771730	MB231_CTRL	MB231_W2	OK	4.30024	27.2079	2.66154	4.11763	5e-05	0.000503098	yes
ENSG00000139182.13	CLSTN3	1.51921	3.48429	1.80913	6.25267	5.57376	7.87282	ENSG00000139182.13	CLSTN3	chr12:7129078-7158945	MB231_CTRL	MB231_W2	OK	2.27088	6.56642	1.53186	1.39606	0.0001	0.000939965	yes
ENSG00000139190.16	VAMP1	1.24728	0.641107	0.934222	3.54774	3.88877	4.12731	ENSG00000139190.16	VAMP1	chr12:6439000-6470987	MB231_CTRL	MB231_W2	OK	0.940871	3.85461	2.03451	1.55388	0.0004	0.00314441	yes
ENSG00000139209.15	SLC38A4	5.26967	5.1975	6.4578	2.44294	3.02162	3.64555	ENSG00000139209.15	SLC38A4	chr12:46383678-46876159	MB231_CTRL	MB231_W2	OK	5.64165	3.0367	-0.893612	-2.0086	0.0001	0.000939965	yes
ENSG00000139211.6	AMIGO2	14.1218	15.5073	17.868	19.049	23.6409	20.3511	ENSG00000139211.6	AMIGO2	chr12:47075706-47236662	MB231_CTRL	MB231_W2	OK	15.8324	21.0137	0.40845	2.23525	0.00015	0.00134259	yes
ENSG00000139324.11	TMTC3	19.9008	22.0504	35.3265	13.022	15.993	10.8341	ENSG00000139324.11	TMTC3	chr12:88142295-88199887	MB231_CTRL	MB231_W2	OK	25.7592	13.283	-0.955505	-2.16467	0.0001	0.000939965	yes
ENSG00000139343.10	SNRPF	57.2417	56.2998	62.6378	48.0462	43.2254	54.1991	ENSG00000139343.10	SNRPF	chr12:95858927-95942974	MB231_CTRL	MB231_W2	OK	58.7264	48.4902	-0.276316	-1.56203	0.0062	0.0305424	yes
ENSG00000139372.14	TDG	7.23393	9.64941	8.67584	10.8707	17.5005	14.3622	ENSG00000139372.14	TDG	chr12:103965803-103988874	MB231_CTRL	MB231_W2	OK	8.51973	14.2445	0.741523	2.34429	5e-05	0.000503098	yes
ENSG00000139405.15	RITA1	16.0426	18.6265	15.3296	9.69873	12.4113	14.795	ENSG00000139405.15	RITA1	chr12:113185525-113192368	MB231_CTRL	MB231_W2	OK	16.6662	12.3017	-0.438074	-1.68473	0.00535	0.0271868	yes
ENSG00000139433.9	GLTP	33.739	37.0008	34.6524	22.5528	28.2212	30.158	ENSG00000139433.9	GLTP	chr12:109850942-109880488	MB231_CTRL	MB231_W2	OK	35.1308	26.9773	-0.380986	-2.22921	0.0001	0.000939965	yes
ENSG00000139437.17	TCHP	7.42987	8.68586	8.58858	11.7556	18.0468	13.9518	ENSG00000139437.17	TCHP	chr12:109900263-109996389	MB231_CTRL	MB231_W2	OK	8.23477	14.5847	0.824657	1.79318	0.00235	0.0138868	yes
ENSG00000139505.11	MTMR6	8.2501	8.99908	8.00695	13.3273	11.8888	11.5514	ENSG00000139505.11	MTMR6	chr13:25246200-25288009	MB231_CTRL	MB231_W2	OK	8.41871	12.2558	0.541797	1.65577	0.0041	0.0218807	yes
ENSG00000139514.12	SLC7A1	46.443	51.9718	51.0309	29.0754	30.9671	32.4352	ENSG00000139514.12	SLC7A1	chr13:29509409-29595688	MB231_CTRL	MB231_W2	OK	49.8152	30.8259	-0.692444	-3.2547	5e-05	0.000503098	yes
ENSG00000139517.7	LNX2	2.37036	3.33304	3.12707	2.04726	2.02784	2.33425	ENSG00000139517.7	LNX2	chr13:27545910-27620404	MB231_CTRL	MB231_W2	OK	2.94349	2.13645	-0.462313	-1.55635	0.0086	0.0395443	yes
ENSG00000139531.12	SUOX	1.03349	2.56894	2.23507	2.20262	4.21065	4.32768	ENSG00000139531.12	SUOX	chr12:55997179-56006641	MB231_CTRL	MB231_W2	OK	1.94583	3.58031	0.8797	0.68032	0.0108	0.0473257	yes
ENSG00000139546.10	TARBP2	11.4418	10.9483	11.3564	18.4367	20.2365	18.3643	ENSG00000139546.10	TARBP2	chr12:53500161-53506431	MB231_CTRL	MB231_W2	OK	11.2489	19.0125	0.757171	2.05782	0.0001	0.000939965	yes
ENSG00000139620.12	KANSL2	14.6148	21.4137	14.9571	41.0165	17.9504	38.3542	ENSG00000139620.12	KANSL2	chr12:48653400-48682238	MB231_CTRL	MB231_W2	OK	16.9952	32.4403	0.932662	1.79354	0.00585	0.0291483	yes
ENSG00000139631.18	CSAD	0.577026	0.98638	0.764595	3.48271	5.9546	4.89425	ENSG00000139631.18	CSAD	chr12:53157662-53207307	MB231_CTRL	MB231_W2	OK	0.776001	4.77719	2.62203	0.970552	5e-05	0.000503098	yes
ENSG00000139636.15	LMBR1L	5.98615	7.24398	5.49336	11.4078	13.2045	11.991	ENSG00000139636.15	LMBR1L	chr12:49096550-49110900	MB231_CTRL	MB231_W2	OK	6.24117	12.2011	0.967125	1.22212	0.00045	0.00346901	yes
ENSG00000139644.12	TMBIM6	200.421	223.32	220.449	159.038	165.759	161.069	ENSG00000139644.12	TMBIM6	chr12:49568217-49764934	MB231_CTRL	MB231_W2	OK	214.73	161.955	-0.406924	-2.01699	0.0002	0.00172918	yes
ENSG00000139651.10	ZNF740	2.40814	4.44482	4.09249	5.81018	6.00468	10.4709	ENSG00000139651.10	ZNF740	chr12:53157662-53207307	MB231_CTRL	MB231_W2	OK	3.64849	7.42861	1.02579	1.49556	0.00855	0.0393814	yes
ENSG00000139668.8	WDFY2	2.72666	1.68464	2.23034	3.2913	8.18575	6.53042	ENSG00000139668.8	WDFY2	chr13:51584454-51767707	MB231_CTRL	MB231_W2	OK	2.21388	6.00249	1.43898	2.34821	5e-05	0.000503098	yes
ENSG00000139697.12	SBNO1	24.7994	28.0575	28.7673	15.2137	15.4714	15.2234	ENSG00000139697.12	SBNO1	chr12:123289108-123366113	MB231_CTRL	MB231_W2	OK	27.2081	15.3028	-0.830235	-2.71764	5e-05	0.000503098	yes
ENSG00000139722.6	VPS37B	26.1515	29.0266	28.5315	19.9014	23.6184	21.4072	ENSG00000139722.6	VPS37B	chr12:122865327-122896444	MB231_CTRL	MB231_W2	OK	27.9032	21.6423	-0.366574	-1.73733	0.00325	0.018039	yes
ENSG00000139734.17	DIAPH3	24.1073	26.7259	30.6305	17.8037	17.6403	20.3772	ENSG00000139734.17	DIAPH3	chr13:59665582-60163987	MB231_CTRL	MB231_W2	OK	27.1546	18.607	-0.545346	-2.74389	5e-05	0.000503098	yes
ENSG00000139746.15	RBM26	9.5732	12.4661	13.4026	31.0021	28.2827	26.2016	ENSG00000139746.15	RBM26	chr13:79311823-79424328	MB231_CTRL	MB231_W2	OK	11.814	28.4955	1.27024	4.41375	5e-05	0.000503098	yes
ENSG00000139793.18	MBNL2	35.1238	38.6532	33.0433	19.4741	20.8274	17.5272	ENSG00000139793.18	MBNL2	chr13:97221433-97394120	MB231_CTRL	MB231_W2	OK	35.6068	19.2762	-0.88533	-3.3077	5e-05	0.000503098	yes
ENSG00000139826.5	ABHD13	4.81555	5.94184	5.77268	8.19516	8.1916	7.57808	ENSG00000139826.5	ABHD13	chr13:108218378-108234255	MB231_CTRL	MB231_W2	OK	5.51002	7.98828	0.535827	2.40872	5e-05	0.000503098	yes
ENSG00000139842.14	CUL4A	37.9472	45.8057	38.196	24.9997	28.1266	25.7679	ENSG00000139842.14	CUL4A	chr13:113177538-113267108	MB231_CTRL	MB231_W2	OK	40.6496	26.2981	-0.628286	-2.05177	0.00015	0.00134259	yes
ENSG00000139880.19	CDH24	4.48254	4.37575	3.94344	7.52057	12.561	9.02651	ENSG00000139880.19	CDH24	chr14:23047061-23057538	MB231_CTRL	MB231_W2	OK	4.26724	9.7027	1.18508	3.64781	5e-05	0.000503098	yes
ENSG00000139977.13	NAA30	8.86651	9.6628	9.0753	8.15347	5.8261	6.00257	ENSG00000139977.13	NAA30	chr14:57390543-57415917	MB231_CTRL	MB231_W2	OK	9.20153	6.66071	-0.466198	-1.62891	0.00565	0.0283572	yes
ENSG00000140259.6	MFAP1	13.6616	16.0111	18.1906	9.01932	8.18757	10.1042	ENSG00000140259.6	MFAP1	chr15:43804491-43824802	MB231_CTRL	MB231_W2	OK	15.9544	9.10371	-0.809429	-3.96767	5e-05	0.000503098	yes
ENSG00000140263.13	SORD	9.05932	10.5593	8.02849	5.2374	7.18314	5.17543	ENSG00000140263.13	SORD	chr15:45023103-45077185	MB231_CTRL	MB231_W2	OK	9.2157	5.86532	-0.651883	-1.48715	0.0073	0.034762	yes
ENSG00000140307.10	GTF2A2	59.3728	64.0895	53.8891	86.1226	122.955	115.621	ENSG00000140307.10	GTF2A2	chr15:59594874-59689534	MB231_CTRL	MB231_W2	OK	59.1171	108.233	0.872492	2.37288	0.0001	0.000939965	yes
ENSG00000140320.11	BAHD1	5.60316	5.80986	5.5788	3.98764	4.37357	3.93953	ENSG00000140320.11	BAHD1	chr15:40439720-40468242	MB231_CTRL	MB231_W2	OK	5.66394	4.10025	-0.466096	-1.57467	0.00505	0.0259515	yes
ENSG00000140350.15	ANP32A	62.6026	65.9683	63.1673	48.8807	28.2408	45.9681	ENSG00000140350.15	ANP32A	chr15:68778534-69062743	MB231_CTRL	MB231_W2	OK	63.9127	41.0299	-0.639429	-2.1505	0.00095	0.00654723	yes
ENSG00000140367.11	UBE2Q2	11.5013	9.25716	9.46643	10.6044	15.6043	17.3285	ENSG00000140367.11	UBE2Q2	chr15:75843284-75901078	MB231_CTRL	MB231_W2	OK	10.075	14.5124	0.526509	1.36476	0.00915	0.0414985	yes
ENSG00000140395.8	WDR61	12.0231	14.508	18.307	23.5764	29.2051	27.0061	ENSG00000140395.8	WDR61	chr15:78250501-78299924	MB231_CTRL	MB231_W2	OK	14.946	26.5959	0.83144	2.85587	5e-05	0.000503098	yes
ENSG00000140398.13	NEIL1	0.50357	0.193671	0.826995	1.69862	7.74343	4.25268	ENSG00000140398.13	NEIL1	chr15:75346743-75455842	MB231_CTRL	MB231_W2	OK	0.508079	4.56491	3.16746	0.587932	5e-05	0.000503098	yes
ENSG00000140400.15	MAN2C1	9.62555	9.07627	10.773	32.9395	51.5888	43.7904	ENSG00000140400.15	MAN2C1	chr15:75346743-75455842	MB231_CTRL	MB231_W2	OK	9.82493	42.7729	2.12218	2.51636	5e-05	0.000503098	yes
ENSG00000140451.12	PIF1	3.6993	2.89365	5.0281	23.8577	23.0641	16.8681	ENSG00000140451.12	PIF1	chr15:64815631-64825668	MB231_CTRL	MB231_W2	OK	3.87369	21.2633	2.45659	4.3286	5e-05	0.000503098	yes
ENSG00000140463.13	BBS4	2.40023	0.979591	1.77239	2.99605	4.66781	5.08496	ENSG00000140463.13	BBS4	chr15:72686178-72738476	MB231_CTRL	MB231_W2	OK	1.7174	4.24961	1.3071	0.795513	0.00345	0.018982	yes
ENSG00000140471.16	LINS1	5.40586	4.05223	4.58612	7.92761	9.76118	9.31359	ENSG00000140471.16	LINS1	chr15:100553528-100651705	MB231_CTRL	MB231_W2	OK	4.6814	9.00079	0.943111	1.23288	0.00975	0.0436805	yes
ENSG00000140474.12	ULK3	4.51063	4.26116	4.50296	8.04222	11.9792	11.9349	ENSG00000140474.12	ULK3	chr15:74836115-74843346	MB231_CTRL	MB231_W2	OK	4.42492	10.6521	1.26742	1.63887	5e-05	0.000503098	yes
ENSG00000140525.17	FANCI	13.0105	13.8758	11.7705	20.0609	24.0736	23.6502	ENSG00000140525.17	FANCI	chr15:89243948-89334861	MB231_CTRL	MB231_W2	OK	12.8856	22.5949	0.810238	1.5142	0.0021	0.0126444	yes
ENSG00000140526.17	ABHD2	19.4048	20.9694	21.6536	12.8028	13.2352	12.906	ENSG00000140526.17	ABHD2	chr15:89087077-89202360	MB231_CTRL	MB231_W2	OK	20.6759	12.9813	-0.671512	-2.50016	5e-05	0.000503098	yes
ENSG00000140534.13	TICRR	3.93295	4.14063	4.41375	7.40365	10.5894	10.0207	ENSG00000140534.13	TICRR	chr15:89505276-89655451	MB231_CTRL	MB231_W2	OK	4.16244	9.33791	1.16567	4.56307	5e-05	0.000503098	yes
ENSG00000140553.16	UNC45A	17.0694	16.5821	20.0931	11.0203	14.4221	12.6064	ENSG00000140553.16	UNC45A	chr15:90929963-90963125	MB231_CTRL	MB231_W2	OK	17.9149	12.6829	-0.49827	-1.3533	0.0086	0.0395443	yes
ENSG00000140564.10	FURIN	25.0514	33.3372	27.8283	12.5201	18.4543	15.8641	ENSG00000140564.10	FURIN	chr15:90868591-90883458	MB231_CTRL	MB231_W2	OK	28.739	15.6128	-0.880276	-3.6731	5e-05	0.000503098	yes
ENSG00000140575.12	IQGAP1	89.6097	94.279	102.516	60.7723	68.7495	63.586	ENSG00000140575.12	IQGAP1	chr15:90388217-90502243	MB231_CTRL	MB231_W2	OK	95.4682	64.3693	-0.568649	-1.39057	0.005	0.025747	yes
ENSG00000140718.19	FTO	17.3667	18.8414	17.2639	12.1206	15.4001	13.7156	ENSG00000140718.19	FTO	chr16:53597682-54158512	MB231_CTRL	MB231_W2	OK	17.824	13.7454	-0.374868	-1.45584	0.00725	0.0345805	yes
ENSG00000140740.10	UQCRC2	24.3229	26.8186	23.649	33.8529	29.2781	49.3513	ENSG00000140740.10	UQCRC2	chr16:21952659-21983660	MB231_CTRL	MB231_W2	OK	24.9302	37.4941	0.588771	1.44173	0.00995	0.0443821	yes
ENSG00000140743.7	CDR2	14.3739	16.1561	14.5915	10.7503	8.9364	11.6619	ENSG00000140743.7	CDR2	chr16:22345935-22536521	MB231_CTRL	MB231_W2	OK	15.0405	10.4495	-0.525414	-1.86411	0.0011	0.00740172	yes
ENSG00000140853.15	NLRC5	4.46603	3.50342	6.51919	10.4295	15.9495	13.7904	ENSG00000140853.15	NLRC5	chr16:56989484-57083531	MB231_CTRL	MB231_W2	OK	4.82955	13.3898	1.47117	1.78705	5e-05	0.000503098	yes
ENSG00000140859.15	KIFC3	41.0602	46.363	48.8604	60.6582	68.8769	70.0588	ENSG00000140859.15	KIFC3	chr16:57758216-57863053	MB231_CTRL	MB231_W2	OK	45.4279	66.5313	0.550456	1.78514	0.00105	0.00712483	yes
ENSG00000140937.13	CDH11	126.233	115.763	116.097	51.1051	64.3335	53.2638	ENSG00000140937.13	CDH11	chr16:64943752-65126112	MB231_CTRL	MB231_W2	OK	119.364	56.2341	-1.08585	-2.9903	5e-05	0.000503098	yes
ENSG00000140983.13	RHOT2	9.67613	12.6817	11.0513	23.1282	15.9364	27.4054	ENSG00000140983.13	RHOT2	chr16:668085-674174	MB231_CTRL	MB231_W2	OK	11.1364	22.1567	0.992463	1.85874	0.00015	0.00134259	yes
ENSG00000140993.10	TIGD7	2.11729	3.04067	3.03074	7.19596	8.9413	10.6912	ENSG00000140993.10	TIGD7	chr16:3263742-3318852	MB231_CTRL	MB231_W2	OK	2.72957	8.94282	1.71206	1.82158	0.0005	0.00379645	yes
ENSG00000141013.15	GAS8	4.71648	6.07486	6.05645	12.0512	5.66972	17.1291	ENSG00000141013.15	GAS8	chr16:90004864-90047773	MB231_CTRL	MB231_W2	OK	5.61593	11.6167	1.0486	1.50766	0.00145	0.00933362	yes
ENSG00000141258.12	SGSM2	12.4015	12.3065	10.5859	24.5021	39.5787	36.9804	ENSG00000141258.12	SGSM2	chr17:2054153-2381058	MB231_CTRL	MB231_W2	OK	11.7646	33.6871	1.51774	1.76113	0.00055	0.0041207	yes
ENSG00000141279.15	NPEPPS	32.7215	28.7535	30.0293	45.1969	60.3898	52.6356	ENSG00000141279.15	NPEPPS	chr17:47522941-47649420	MB231_CTRL	MB231_W2	OK	30.5014	52.7407	0.790042	2.10007	0.00065	0.00473038	yes
ENSG00000141295.13	SCRN2	10.2958	11.45	10.0232	15.7843	23.4434	25.8998	ENSG00000141295.13	SCRN2	chr17:47831626-47841333	MB231_CTRL	MB231_W2	OK	10.5897	21.7091	1.03564	3.28985	5e-05	0.000503098	yes
ENSG00000141349.8	G6PC3	68.0909	71.795	71.1721	44.9679	60.9347	50.4414	ENSG00000141349.8	G6PC3	chr17:44070734-44076344	MB231_CTRL	MB231_W2	OK	70.3527	52.1147	-0.432916	-1.71314	0.0025	0.0146112	yes
ENSG00000141367.11	CLTC	206.063	215.252	216.692	113.732	124.338	100.889	ENSG00000141367.11	CLTC	chr17:59618552-59842255	MB231_CTRL	MB231_W2	OK	212.669	112.987	-0.912457	-2.56073	5e-05	0.000503098	yes
ENSG00000141376.21	BCAS3	4.8845	2.53315	5.72778	7.61135	7.84338	11.4785	ENSG00000141376.21	BCAS3	chr17:60677452-61411555	MB231_CTRL	MB231_W2	OK	4.38181	8.97773	1.03482	1.07408	0.00095	0.00654723	yes
ENSG00000141380.13	SS18	46.1713	51.9445	48.0269	72.1311	77.4819	78.8544	ENSG00000141380.13	SS18	chr18:26016252-26091217	MB231_CTRL	MB231_W2	OK	48.7142	76.1558	0.644611	2.29784	5e-05	0.000503098	yes
ENSG00000141424.12	SLC39A6	23.3626	25.9751	27.5841	19.2294	16.0805	19.2467	ENSG00000141424.12	SLC39A6	chr18:36108531-36129385	MB231_CTRL	MB231_W2	OK	25.6406	18.1855	-0.495639	-2.71407	5e-05	0.000503098	yes
ENSG00000141447.16	OSBPL1A	10.552	9.88989	11.3916	6.24874	7.60378	6.75899	ENSG00000141447.16	OSBPL1A	chr18:24138955-24397880	MB231_CTRL	MB231_W2	OK	10.6112	6.8705	-0.627097	-1.74428	0.00065	0.00473038	yes
ENSG00000141448.8	GATA6	22.7981	23.4673	22.7416	13.7508	17.6439	13.0396	ENSG00000141448.8	GATA6	chr18:22169442-22205229	MB231_CTRL	MB231_W2	OK	23.0023	14.8115	-0.635065	-3.14802	5e-05	0.000503098	yes
ENSG00000141543.9	EIF4A3	87.7636	90.9561	80.7527	53.7853	68.8963	68.0307	ENSG00000141543.9	EIF4A3	chr17:80135213-80147183	MB231_CTRL	MB231_W2	OK	86.4908	63.5708	-0.444183	-2.11053	0.0004	0.00314441	yes
ENSG00000141551.14	CSNK1D	48.3884	50.7076	45.5227	76.4661	82.5908	70.0748	ENSG00000141551.14	CSNK1D	chr17:82228396-82273731	MB231_CTRL	MB231_W2	OK	48.2062	76.3773	0.663923	1.69318	0.0018	0.0111376	yes
ENSG00000141562.17	NARF	14.6701	15.7536	13.8883	25.6477	27.0208	24.3874	ENSG00000141562.17	NARF	chr17:82454272-82490537	MB231_CTRL	MB231_W2	OK	14.7707	25.6853	0.798205	1.87253	0.00025	0.00209262	yes
ENSG00000141574.7	SECTM1	17.553	16.0759	16.0764	7.26047	9.10818	8.97064	ENSG00000141574.7	SECTM1	chr17:82321023-82334074	MB231_CTRL	MB231_W2	OK	16.5684	8.44643	-0.972023	-2.30455	0.0001	0.000939965	yes
ENSG00000141582.14	CBX4	10.0789	12.2697	11.7047	9.10575	9.05047	6.8616	ENSG00000141582.14	CBX4	chr17:79833155-79839429	MB231_CTRL	MB231_W2	OK	11.3511	8.33928	-0.444839	-1.34223	0.0116	0.0499123	yes
ENSG00000141644.17	MBD1	11.1066	13.5336	11.7637	16.5425	19.7354	19.7918	ENSG00000141644.17	MBD1	chr18:50266881-50281774	MB231_CTRL	MB231_W2	OK	12.1347	18.6899	0.623124	1.67977	0.0011	0.00740172	yes
ENSG00000141655.15	TNFRSF11A	3.17706	4.06301	3.80358	1.81672	1.59159	1.61218	ENSG00000141655.15	TNFRSF11A	chr18:62325286-62391292	MB231_CTRL	MB231_W2	OK	3.68122	1.6735	-1.13731	-1.56756	0.00305	0.0171451	yes
ENSG00000141753.6	IGFBP4	561.812	628.994	603.344	304.092	396.21	380.178	ENSG00000141753.6	IGFBP4	chr17:40443460-40457731	MB231_CTRL	MB231_W2	OK	598.05	360.16	-0.731629	-4.60579	5e-05	0.000503098	yes
ENSG00000141858.11	SAMD1	33.6895	34.8075	34.0325	21.0211	20.0344	26.8537	ENSG00000141858.11	SAMD1	chr19:14087839-14091036	MB231_CTRL	MB231_W2	OK	34.1765	22.6364	-0.59436	-3.04329	5e-05	0.000503098	yes
ENSG00000141905.17	NFIC	59.1541	59.4199	57.5642	36.8834	48.6009	41.1744	ENSG00000141905.17	NFIC	chr19:3359562-3469217	MB231_CTRL	MB231_W2	OK	58.7127	42.2196	-0.475762	-1.80148	0.0006	0.00442867	yes
ENSG00000141956.13	PRDM15	3.44796	2.17601	2.48214	4.92241	6.29968	8.90609	ENSG00000141956.13	PRDM15	chr21:41798224-41879482	MB231_CTRL	MB231_W2	OK	2.70204	6.70939	1.31213	1.55232	0.0005	0.00379645	yes
ENSG00000141965.4	FEM1A	6.92143	7.14947	7.87591	5.22455	7.32294	5.66521	ENSG00000141965.4	FEM1A	chr19:4791680-4801273	MB231_CTRL	MB231_W2	OK	7.3156	6.0709	-0.269065	-1.55367	0.0062	0.0305424	yes
ENSG00000141985.9	SH3GL1	49.5438	53.2488	51.9108	29.6732	34.3197	37.3124	ENSG00000141985.9	SH3GL1	chr19:4360369-4400547	MB231_CTRL	MB231_W2	OK	51.5678	33.7684	-0.610796	-3.43197	5e-05	0.000503098	yes
ENSG00000141994.15	DUS3L	10.4305	14.7372	10.4077	14.9507	28.4792	38.8128	ENSG00000141994.15	DUS3L	chr19:5782959-5791238	MB231_CTRL	MB231_W2	OK	11.8585	27.4142	1.209	2.5931	5e-05	0.000503098	yes
ENSG00000142046.14	TMEM91	0.43331	0.707565	0.834589	2.08585	1.76958	4.64816	ENSG00000142046.14	TMEM91	chr19:41262495-41425005	MB231_CTRL	MB231_W2	OK	0.658488	2.83453	2.10588	0.382915	0.00295	0.0166971	yes
ENSG00000142089.15	IFITM3	130.418	128.902	120.319	74.8558	87.3124	78.5445	ENSG00000142089.15	IFITM3	chr11:318639-330122	MB231_CTRL	MB231_W2	OK	126.547	80.2376	-0.657319	-3.6891	5e-05	0.000503098	yes
ENSG00000142102.15	ATHL1	0.659241	0.837906	0.389675	2.21211	4.76407	3.08248	ENSG00000142102.15	ATHL1	chr11:289134-296107	MB231_CTRL	MB231_W2	OK	0.628941	3.35289	2.41441	1.5835	0.00095	0.00654723	yes
ENSG00000142156.14	COL6A1	32.74	36.931	31.922	14.4826	19.959	16.3203	ENSG00000142156.14	COL6A1	chr21:45981736-46005050	MB231_CTRL	MB231_W2	OK	33.8644	16.9206	-1.00099	-3.58873	5e-05	0.000503098	yes
ENSG00000142168.14	SOD1	249.39	276.973	276.839	173.953	212.141	200.691	ENSG00000142168.14	SOD1	chr21:31659621-31668931	MB231_CTRL	MB231_W2	OK	267.734	195.595	-0.452931	-2.7691	5e-05	0.000503098	yes
ENSG00000142192.20	APP	170.348	205.133	210.266	95.7228	88.3542	92.85	ENSG00000142192.20	APP	chr21:25880549-26217381	MB231_CTRL	MB231_W2	OK	195.249	92.309	-1.08077	-3.57163	5e-05	0.000503098	yes
ENSG00000142197.12	DOPEY2	21.0299	19.8544	24.1317	9.68436	14.5458	10.8267	ENSG00000142197.12	DOPEY2	chr21:36131766-36294274	MB231_CTRL	MB231_W2	OK	21.672	11.6856	-0.891098	-1.70035	0.00325	0.018039	yes
ENSG00000142227.10	EMP3	167.954	181.898	170.513	140.49	100.625	96.1448	ENSG00000142227.10	EMP3	chr19:48296456-48330553	MB231_CTRL	MB231_W2	OK	173.455	112.42	-0.625665	-2.43296	5e-05	0.000503098	yes
ENSG00000142230.11	SAE1	56.2315	57.2376	59.3523	36.3756	42.3111	40.3801	ENSG00000142230.11	SAE1	chr19:47064186-47210636	MB231_CTRL	MB231_W2	OK	57.6071	39.6889	-0.53751	-2.00669	0.0003	0.00245627	yes
ENSG00000142330.19	CAPN10	2.5178	2.38927	3.85513	7.43473	5.74648	6.18167	ENSG00000142330.19	CAPN10	chr2:240586715-240631259	MB231_CTRL	MB231_W2	OK	2.92074	6.45429	1.14393	1.4651	0.0005	0.00379645	yes
ENSG00000142396.10	ERVK3-1	21.8637	24.1732	20.5669	33.2697	33.7362	36.0691	ENSG00000142396.10	ERVK3-1	chr19:58228593-58326933	MB231_CTRL	MB231_W2	OK	22.2013	34.3583	0.630018	1.89868	0.00085	0.00593698	yes
ENSG00000142453.11	CARM1	33.9259	44.5738	37.5454	22.4471	25.889	20.494	ENSG00000142453.11	CARM1	chr19:10871512-10928681	MB231_CTRL	MB231_W2	OK	38.6817	22.9433	-0.753577	-2.49519	5e-05	0.000503098	yes
ENSG00000142507.9	PSMB6	154.738	153.16	163.725	85.1869	92.8944	99.0175	ENSG00000142507.9	PSMB6	chr17:4796143-4798503	MB231_CTRL	MB231_W2	OK	157.208	92.3663	-0.767233	-4.64728	5e-05	0.000503098	yes
ENSG00000142534.6	RPS11	273.513	288.67	254.017	283.241	378.053	349.711	ENSG00000142534.6	RPS11	chr19:49496364-49499689	MB231_CTRL	MB231_W2	OK	272.067	337.002	0.308796	1.8535	0.00135	0.00878859	yes
ENSG00000142556.18	ZNF614	6.88255	6.04517	5.88565	7.37975	9.49842	9.75374	ENSG00000142556.18	ZNF614	chr19:52012764-52030240	MB231_CTRL	MB231_W2	OK	6.27112	8.8773	0.501398	2.02441	0.00025	0.00209262	yes
ENSG00000142634.12	EFHD2	134.854	151.729	149.869	91.8316	105.518	116.008	ENSG00000142634.12	EFHD2	chr1:15409894-15430343	MB231_CTRL	MB231_W2	OK	145.484	104.452	-0.478019	-2.96749	5e-05	0.000503098	yes
ENSG00000142657.20	PGD	45.4026	51.384	51.1977	28.9527	21.4896	27.306	ENSG00000142657.20	PGD	chr1:10398591-10420144	MB231_CTRL	MB231_W2	OK	49.3281	25.9161	-0.928561	-2.25074	0.0004	0.00314441	yes
ENSG00000142669.14	SH3BGRL3	292.625	311.477	273.627	140.534	172.208	176.548	ENSG00000142669.14	SH3BGRL3	chr1:26279175-26320523	MB231_CTRL	MB231_W2	OK	292.577	163.097	-0.843087	-4.28437	5e-05	0.000503098	yes
ENSG00000142676.12	RPL11	454.714	456.477	449.832	307.327	371.603	352.74	ENSG00000142676.12	RPL11	chr1:23691778-23696425	MB231_CTRL	MB231_W2	OK	453.674	343.89	-0.399709	-2.41222	5e-05	0.000503098	yes
ENSG00000142731.10	PLK4	40.6335	44.156	45.2032	66.6098	68.4193	67.242	ENSG00000142731.10	PLK4	chr4:127880860-127899195	MB231_CTRL	MB231_W2	OK	43.3309	67.4237	0.637858	2.19995	0.0002	0.00172918	yes
ENSG00000142765.17	SYTL1	1.22514	1.56738	1.16171	2.56858	4.98536	2.51495	ENSG00000142765.17	SYTL1	chr1:27342019-27353937	MB231_CTRL	MB231_W2	OK	1.31807	3.3563	1.34844	1.11712	0.0028	0.01604	yes
ENSG00000142784.15	WDTC1	8.74414	10.1648	8.87287	6.32203	7.24469	6.83577	ENSG00000142784.15	WDTC1	chr1:27234515-27308633	MB231_CTRL	MB231_W2	OK	9.2606	6.80083	-0.445395	-1.91147	0.0007	0.00502945	yes
ENSG00000142856.16	ITGB3BP	29.3686	25.6339	21.5065	63.7324	58.2653	55.8118	ENSG00000142856.16	ITGB3BP	chr1:63440769-63660245	MB231_CTRL	MB231_W2	OK	25.503	59.2698	1.21663	2.12233	0.00195	0.0118792	yes
ENSG00000142864.14	SERBP1	193.774	224.875	237.081	143.207	138.016	137.563	ENSG00000142864.14	SERBP1	chr1:67407809-67430415	MB231_CTRL	MB231_W2	OK	218.577	139.595	-0.64689	-2.99564	5e-05	0.000503098	yes
ENSG00000142871.16	CYR61	419.642	471.809	443.764	360.578	379.398	359.665	ENSG00000142871.16	CYR61	chr1:85580760-85583962	MB231_CTRL	MB231_W2	OK	445.072	366.547	-0.280039	-1.65414	0.00295	0.0166971	yes
ENSG00000142892.14	PIGK	24.6623	29.4859	25.5925	14.9637	14.9831	14.7949	ENSG00000142892.14	PIGK	chr1:77088989-77219430	MB231_CTRL	MB231_W2	OK	26.5802	14.9139	-0.833699	-3.46767	5e-05	0.000503098	yes
ENSG00000142910.15	TINAGL1	38.3504	46.5247	40.3775	56.3526	61.6832	59.5576	ENSG00000142910.15	TINAGL1	chr1:31576484-31587686	MB231_CTRL	MB231_W2	OK	41.7509	59.1978	0.503737	2.44161	0.00015	0.00134259	yes
ENSG00000142937.11	RPS8	369.685	378.986	355.419	411.16	514.935	512.518	ENSG00000142937.11	RPS8	chr1:44739817-44778779	MB231_CTRL	MB231_W2	OK	368.03	479.538	0.38182	2.05434	0.0003	0.00245627	yes
ENSG00000143033.17	MTF2	6.99449	11.7132	7.6799	12.0075	10.9944	16.4054	ENSG00000143033.17	MTF2	chr1:93079234-93139081	MB231_CTRL	MB231_W2	OK	8.79587	13.1358	0.578602	1.48149	0.006	0.0297391	yes
ENSG00000143106.12	PSMA5	62.376	62.0447	64.4227	83.7642	114.717	101.372	ENSG00000143106.12	PSMA5	chr1:109399030-109426427	MB231_CTRL	MB231_W2	OK	62.9478	99.9514	0.66707	3.3063	5e-05	0.000503098	yes
ENSG00000143127.12	ITGA10	0.163967	0.271386	0.301288	1.19999	3.44338	1.52397	ENSG00000143127.12	ITGA10	chr1:145891207-145910189	MB231_CTRL	MB231_W2	OK	0.245547	2.05578	3.06562	0.673173	0.01145	0.0494186	yes
ENSG00000143153.12	ATP1B1	112.675	112.763	113.896	74.0727	71.7268	76.2279	ENSG00000143153.12	ATP1B1	chr1:169105696-169367967	MB231_CTRL	MB231_W2	OK	113.111	74.0091	-0.611968	-3.27802	5e-05	0.000503098	yes
ENSG00000143155.12	TIPRL	27.7556	27.2764	31.2208	37.4864	41.9087	50.2523	ENSG00000143155.12	TIPRL	chr1:168178932-168202114	MB231_CTRL	MB231_W2	OK	28.751	43.2158	0.587949	2.64021	5e-05	0.000503098	yes
ENSG00000143157.11	POGK	26.8438	28.102	30.199	19.1409	21.8401	21.2549	ENSG00000143157.11	POGK	chr1:166839446-166856344	MB231_CTRL	MB231_W2	OK	28.3816	20.7453	-0.452173	-2.16742	0.00025	0.00209262	yes
ENSG00000143158.10	MPC2	31.8939	28.1443	30.6942	32.27	54.6241	49.7214	ENSG00000143158.10	MPC2	chr1:167916728-168075843	MB231_CTRL	MB231_W2	OK	30.2442	45.5385	0.590431	1.51178	0.0094	0.0424543	yes
ENSG00000143195.12	ILDR2	11.2283	13.5147	13.6488	5.05401	5.76499	4.66911	ENSG00000143195.12	ILDR2	chr1:166895710-166975482	MB231_CTRL	MB231_W2	OK	12.7972	5.1627	-1.30963	-2.90285	5e-05	0.000503098	yes
ENSG00000143198.12	MGST3	20.676	24.9875	21.7444	36.8666	32.8119	30.4425	ENSG00000143198.12	MGST3	chr1:165630860-165661796	MB231_CTRL	MB231_W2	OK	22.4693	33.3737	0.570757	1.84097	0.0003	0.00245627	yes
ENSG00000143224.17	PPOX	5.46504	4.17423	8.15861	12.6048	11.6239	10.3647	ENSG00000143224.17	PPOX	chr1:161166409-161178013	MB231_CTRL	MB231_W2	OK	5.93263	11.5311	0.958791	1.24573	0.0064	0.031255	yes
ENSG00000143228.12	NUF2	18.7723	16.6164	18.7174	31.8926	51.7599	44.6572	ENSG00000143228.12	NUF2	chr1:163111120-163355764	MB231_CTRL	MB231_W2	OK	18.0354	42.7699	1.24577	3.05548	5e-05	0.000503098	yes
ENSG00000143256.4	PFDN2	50.0044	57.8539	57.2318	31.164	42.9941	40.2888	ENSG00000143256.4	PFDN2	chr1:161100555-161132688	MB231_CTRL	MB231_W2	OK	55.0301	38.149	-0.528576	-2.55582	5e-05	0.000503098	yes
ENSG00000143258.15	USP21	6.48569	6.79164	6.4687	12.8457	10.2943	15.0471	ENSG00000143258.15	USP21	chr1:161159449-161165723	MB231_CTRL	MB231_W2	OK	6.58201	12.7291	0.951526	2.08497	0.0002	0.00172918	yes
ENSG00000143314.12	MRPL24	56.4141	68.695	66.3939	40.8948	45.2065	52.5265	ENSG00000143314.12	MRPL24	chr1:156737302-156741590	MB231_CTRL	MB231_W2	OK	63.8343	46.2093	-0.46615	-1.91493	0.00145	0.00933362	yes
ENSG00000143321.18	HDGF	167.085	185.342	195.151	115.01	123.658	118.105	ENSG00000143321.18	HDGF	chr1:156742106-156800817	MB231_CTRL	MB231_W2	OK	182.526	118.924	-0.618058	-3.47251	5e-05	0.000503098	yes
ENSG00000143324.13	XPR1	11.5358	12.1645	13.157	9.71405	8.24774	6.80036	ENSG00000143324.13	XPR1	chr1:180632003-180890251	MB231_CTRL	MB231_W2	OK	12.2858	8.25405	-0.573815	-1.69638	0.00385	0.0207484	yes
ENSG00000143353.11	LYPLAL1	8.88494	8.77999	9.21744	16.4651	9.9405	20.275	ENSG00000143353.11	LYPLAL1	chr1:219086601-219212865	MB231_CTRL	MB231_W2	OK	8.96079	15.5602	0.796166	2.07009	5e-05	0.000503098	yes
ENSG00000143367.15	TUFT1	14.2508	17.9084	24.1011	8.88035	10.0453	9.07676	ENSG00000143367.15	TUFT1	chr1:151540304-151583583	MB231_CTRL	MB231_W2	OK	18.7534	9.33412	-1.00657	-2.33106	5e-05	0.000503098	yes
ENSG00000143368.9	SF3B4	52.5699	56.7996	52.5137	40.5645	44.6931	44.5181	ENSG00000143368.9	SF3B4	chr1:149923316-149928344	MB231_CTRL	MB231_W2	OK	53.9611	43.2586	-0.318932	-1.88079	0.0014	0.00906419	yes
[truncated: 35,984 more rows]
