# Supplementary material for: The WAVE2/miR-29/Integrin-β1 Oncogenic Signaling Axis Promotes Tumor Growth and Metastasis in Triple-negative Breast Cancer
Source: Cancer Res Commun. 2023 Jan 31;3(1):160–74. doi: 10.1158/2767-9764.CRC-22-0249 (PMC10035451; doi:10.1158/2767-9764.CRC-22-0249)
Supplement: Supplementary Data File SD2 — Raw RNA-seq Data of Control vs W2KO-MDA-MB-468 cells [file crc-22-0249-s16.xlsx]

## Sheet: MB468
	CellLine	MB468	MB468	MB468	MB468	MB468	MB468
	Genotype	CTRL	CTRL	CTRL	W2	W2	W2
Row Labels	Gene	MB468_CTRL_0	MB468_CTRL_1	MB468_CTRL_2	MB468_W2_0	MB468_W2_1	MB468_W2_2	gene_id	gene	locus	sample_1	sample_2	status	value_1	value_2	log2(fold_change)	test_stat	p_value	q_value	MB468_CTRLvMB468_W2
ENSG00000000003.14	TSPAN6	49.8935	47.5352	59.9383	58.719	69.1512	59.4014	ENSG00000000003.14	TSPAN6	chrX:100627108-100639991	MB468_CTRL	MB468_W2	OK	52.4556	62.4239	0.251	1.59489	0.0056	0.0264431	yes
ENSG00000000419.12	DPM1	49.5668	48.0691	56.3272	45.7593	61.9312	45.3472	ENSG00000000419.12	DPM1	chr20:50888918-50958555	MB468_CTRL	MB468_W2	OK	51.321	51.0125	-0.00869743	-0.0213968	0.96875	0.984873	no
ENSG00000000457.13	SCYL3	5.58471	6.38414	6.73341	7.05374	7.06241	8.92811	ENSG00000000457.13	SCYL3	chr1:169662006-169894267	MB468_CTRL	MB468_W2	OK	6.23408	7.68142	0.301195	0.982778	0.08375	0.213865	no
ENSG00000000460.16	C1orf112	13.074	13.3901	14.3708	18.1173	11.7754	16.2417	ENSG00000000460.16	C1orf112	chr1:169662006-169894267	MB468_CTRL	MB468_W2	OK	13.6116	15.3781	0.176042	0.354267	0.5076	0.696738	no
ENSG00000000938.12	FGR	0	0.0847219	0	0	0	0	ENSG00000000938.12	FGR	chr1:27612063-27635277	MB468_CTRL	MB468_W2	NOTEST	0.0282406	0	#NAME?	0	1	1	no
ENSG00000000971.15	CFH	0	0	0	0	0.0909543	0	ENSG00000000971.15	CFH	chr1:196651877-196747504	MB468_CTRL	MB468_W2	NOTEST	0	0.0303181	inf	0	1	1	no
ENSG00000001036.13	FUCA2	29.6544	33.5327	35.0986	20.0212	33.1385	27.2798	ENSG00000001036.13	FUCA2	chr6:143450806-143511690	MB468_CTRL	MB468_W2	OK	32.7619	26.8132	-0.289076	-0.921879	0.10295	0.247496	no
ENSG00000001084.10	GCLC	18.9357	21.8008	19.5599	20.4676	22.1064	25.4987	ENSG00000001084.10	GCLC	chr6:53497340-53617171	MB468_CTRL	MB468_W2	OK	20.0988	22.6909	0.175003	0.646041	0.1897	0.376055	no
ENSG00000001167.14	NFYA	8.55338	10.4609	9.52357	8.13513	9.63529	10.3527	ENSG00000001167.14	NFYA	chr6:41026910-41099976	MB468_CTRL	MB468_W2	OK	9.51261	9.37439	-0.0211173	-0.0932084	0.86905	0.936643	no
ENSG00000001460.17	STPG1	4.68206	5.12574	5.48822	11.3015	7.4849	7.35956	ENSG00000001460.17	STPG1	chr1:24307555-24472976	MB468_CTRL	MB468_W2	OK	5.09867	8.71534	0.773435	0.897093	0.04905	0.144702	no
ENSG00000001461.16	NIPAL3	8.67882	12.7566	10.4376	10.8182	13.8622	15.3296	ENSG00000001461.16	NIPAL3	chr1:24307555-24472976	MB468_CTRL	MB468_W2	OK	10.6243	13.3366	0.328022	1.06641	0.05895	0.166049	no
ENSG00000001497.16	LAS1L	28.3281	32.3825	34.6554	25.2613	24.0211	29.0698	ENSG00000001497.16	LAS1L	chrX:65512581-65534775	MB468_CTRL	MB468_W2	OK	31.7886	26.1174	-0.2835	-0.890856	0.1165	0.269551	no
ENSG00000001561.6	ENPP4	9.75765	7.49402	8.99567	8.136	8.28708	8.21922	ENSG00000001561.6	ENPP4	chr6:46129992-46146699	MB468_CTRL	MB468_W2	OK	8.74911	8.2141	-0.0910346	-0.408166	0.47615	0.671923	no
ENSG00000001617.11	SEMA3F	17.1733	15.445	15.6328	28.4606	33.4511	29.0163	ENSG00000001617.11	SEMA3F	chr3:49940006-50189075	MB468_CTRL	MB468_W2	OK	16.0837	30.3093	0.914162	2.02706	0.0002	0.00163443	yes
ENSG00000001626.14	CFTR	0	0	0	0	0	0	ENSG00000001626.14	CFTR	chr7:117465783-117874139	MB468_CTRL	MB468_W2	NOTEST	0	0	0	0	1	1	no
ENSG00000001629.9	ANKIB1	19.5985	16.4259	11.0445	12.6444	11.7787	17.3926	ENSG00000001629.9	ANKIB1	chr7:92246233-92401384	MB468_CTRL	MB468_W2	OK	15.6896	13.9385	-0.170732	-0.287396	0.6127	0.777048	no
ENSG00000001630.15	CYP51A1	54.2439	59.5198	61.1739	29.3022	30.7042	26.3568	ENSG00000001630.15	CYP51A1	chr7:92112150-92180725	MB468_CTRL	MB468_W2	OK	58.3125	28.7877	-1.01835	-5.50612	5e-05	0.000470501	yes
ENSG00000001631.15	KRIT1	9.30341	13.2724	9.37779	16.4147	16.5449	15.3851	ENSG00000001631.15	KRIT1	chr7:92198968-92246166	MB468_CTRL	MB468_W2	OK	10.6512	16.1149	0.597382	0.873843	0.03075	0.101958	no
ENSG00000002016.17	RAD52	2.30612	4.15836	2.04783	3.11387	4.07997	2.99644	ENSG00000002016.17	RAD52	chr12:912076-1495933	MB468_CTRL	MB468_W2	OK	2.83744	3.39676	0.259573	0.191526	0.5384	0.720818	no
ENSG00000002079.12	MYH16	0.0881823	0.117993	0.422398	1.67481	0.236593	0.145133	ENSG00000002079.12	MYH16	chr7:99238793-99311130	MB468_CTRL	MB468_W2	NOTEST	0.209525	0.685513	1.71006	0	1	1	no
ENSG00000002330.13	BAD	38.5512	43.4414	40.3719	48.0034	49.6783	52.4722	ENSG00000002330.13	BAD	chr11:64269829-64289500	MB468_CTRL	MB468_W2	OK	40.7882	50.0513	0.295256	1.07495	0.0567	0.161273	no
ENSG00000002549.12	LAP3	21.6785	15.1547	21.456	10.2161	12.297	13.109	ENSG00000002549.12	LAP3	chr4:17577191-17614571	MB468_CTRL	MB468_W2	OK	19.4297	11.874	-0.710456	-1.57624	0.00175	0.0102249	yes
ENSG00000002586.18	CD99	25.8977	25.8498	31.675	15.142	24.3241	17.9355	ENSG00000002586.18	CD99	chrX:2691178-2741309	MB468_CTRL	MB468_W2	OK	27.8075	19.1339	-0.539346	-1.97265	0.0006	0.00420723	yes
ENSG00000002587.9	HS3ST1	0.501446	0.431497	0.971726	0.238318	0.302113	0.8447	ENSG00000002587.9	HS3ST1	chr4:11393149-11429765	MB468_CTRL	MB468_W2	NOTEST	0.634889	0.46171	-0.459517	0	1	1	no
ENSG00000002726.20	AOC1	0	0.0778932	0	0	0	0	ENSG00000002726.20	AOC1	chr7:150824626-150861504	MB468_CTRL	MB468_W2	NOTEST	0.0259644	0	#NAME?	0	1	1	no
ENSG00000002745.12	WNT16	0	0	0	0	0	0	ENSG00000002745.12	WNT16	chr7:121325366-121341104	MB468_CTRL	MB468_W2	NOTEST	0	0	0	0	1	1	no
ENSG00000002746.14	HECW1	0	0	0	0	0	0	ENSG00000002746.14	HECW1	chr7:42954134-43566001	MB468_CTRL	MB468_W2	NOTEST	0	0	0	0	1	1	no
ENSG00000002822.15	MAD1L1	34.3723	40.3389	42.9486	47.964	24.0025	41.2499	ENSG00000002822.15	MAD1L1	chr7:1815792-2233243	MB468_CTRL	MB468_W2	OK	39.2199	37.7388	-0.0555389	-0.11853	0.8178	0.907506	no
ENSG00000002834.17	LASP1	50.2212	56.483	51.9069	33.634	38.9992	45.1185	ENSG00000002834.17	LASP1	chr17:38869858-38921770	MB468_CTRL	MB468_W2	OK	52.8704	39.2506	-0.429746	-2.38764	0.0001	0.000882755	yes
ENSG00000002919.14	SNX11	3.80943	4.50463	4.84185	4.31081	4.41459	5.0102	ENSG00000002919.14	SNX11	chr17:48103356-48123074	MB468_CTRL	MB468_W2	OK	4.3853	4.57854	0.0622097	0.0652558	0.86315	0.933413	no
ENSG00000002933.7	TMEM176A	0	0	0	0	0	0	ENSG00000002933.7	TMEM176A	chr7:150791284-150805120	MB468_CTRL	MB468_W2	NOTEST	0	0	0	0	1	1	no
ENSG00000003056.7	M6PR	43.2526	43.423	44.6839	31.8411	31.5964	36.5329	ENSG00000003056.7	M6PR	chr12:8681599-8949955	MB468_CTRL	MB468_W2	OK	43.7865	33.3235	-0.393947	-1.1422	0.0376	0.11868	no
ENSG00000003096.13	KLHL13	4.49315	4.57667	4.80086	1.21009	1.07664	1.40644	ENSG00000003096.13	KLHL13	chrX:117897812-118117340	MB468_CTRL	MB468_W2	OK	4.62356	1.23106	-1.90911	-1.60688	0.0001	0.000882755	yes
ENSG00000003137.8	CYP26B1	2.7112	2.97574	3.30856	6.0072	9.80082	9.20982	ENSG00000003137.8	CYP26B1	chr2:72129237-72148038	MB468_CTRL	MB468_W2	OK	2.9985	8.33928	1.47568	2.36961	5e-05	0.000470501	yes
ENSG00000003147.17	ICA1	15.5069	18.368	16.446	19.1693	15.8413	21.6975	ENSG00000003147.17	ICA1	chr7:8113183-8344516	MB468_CTRL	MB468_W2	OK	16.7736	18.9027	0.172399	0.370003	0.44595	0.646608	no
ENSG00000003249.13	DBNDD1	7.77762	9.17636	8.25024	16.9706	15.6108	15.6944	ENSG00000003249.13	DBNDD1	chr16:90004864-90047773	MB468_CTRL	MB468_W2	OK	8.40141	16.0919	0.937634	2.25447	5e-05	0.000470501	yes
ENSG00000003393.14	ALS2	9.69678	11.8709	10.5241	6.92458	8.33936	8.13313	ENSG00000003393.14	ALS2	chr2:201700553-201781189	MB468_CTRL	MB468_W2	OK	10.6972	7.79902	-0.455874	-1.0542	0.02275	0.0805791	no
ENSG00000003400.14	CASP10	8.24886	9.68817	11.3167	8.78705	10.5881	8.45238	ENSG00000003400.14	CASP10	chr2:201182880-201229406	MB468_CTRL	MB468_W2	OK	9.75123	9.27585	-0.0721053	-0.152385	0.75175	0.869513	no
ENSG00000003402.19	CFLAR	17.0843	12.056	24.6934	18.8013	38.4514	25.1554	ENSG00000003402.19	CFLAR	chr2:201116103-201176687	MB468_CTRL	MB468_W2	OK	17.9446	27.4694	0.614276	0.934069	0.0875	0.220826	no
ENSG00000003436.14	TFPI	31.2185	36.7383	38.3324	32.4761	31.2466	35.0549	ENSG00000003436.14	TFPI	chr2:187001875-187565760	MB468_CTRL	MB468_W2	OK	35.4297	32.9259	-0.10574	-0.312807	0.5311	0.715552	no
ENSG00000003509.15	NDUFAF7	10.449	10.3305	12.097	16.2208	19.2712	24.1697	ENSG00000003509.15	NDUFAF7	chr2:37167819-37324808	MB468_CTRL	MB468_W2	OK	10.9589	19.8872	0.859747	1.07417	0.02385	0.0836427	no
ENSG00000003756.16	RBM5	18.393	24.6669	20.6729	37.3251	83.1452	41.4078	ENSG00000003756.16	RBM5	chr3:49940006-50189075	MB468_CTRL	MB468_W2	OK	21.2443	53.9594	1.3448	2.09058	0.00035	0.00266809	yes
ENSG00000003987.13	MTMR7	0	0	0	0	0	0	ENSG00000003987.13	MTMR7	chr8:17224963-17413528	MB468_CTRL	MB468_W2	NOTEST	0	0	0	0	1	1	no
ENSG00000003989.16	SLC7A2	0.230692	0.0619764	0.1075	0.291371	0.435984	0	ENSG00000003989.16	SLC7A2	chr8:17497087-17570573	MB468_CTRL	MB468_W2	NOTEST	0.13339	0.242452	0.86205	0	1	1	no
ENSG00000004059.10	ARF5	43.8502	47.7631	44.835	21.3594	29.268	39.6725	ENSG00000004059.10	ARF5	chr7:127580617-127602144	MB468_CTRL	MB468_W2	OK	45.4828	30.1	-0.595558	-1.5923	0.00985	0.0415446	yes
ENSG00000004139.13	SARM1	1.55157	1.39785	1.29486	1.74365	3.58015	4.13524	ENSG00000004139.13	SARM1	chr17:28357580-28407197	MB468_CTRL	MB468_W2	OK	1.41476	3.15301	1.15617	0.928802	0.006	0.0279537	yes
ENSG00000004142.11	POLDIP2	36.1221	34.748	33.1669	26.4165	28.8006	26.9853	ENSG00000004142.11	POLDIP2	chr17:28347176-28357522	MB468_CTRL	MB468_W2	OK	34.679	27.4008	-0.339846	-1.89196	0.0013	0.00802013	yes
ENSG00000004399.12	PLXND1	6.78197	7.41364	7.00624	8.5397	5.27608	8.69423	ENSG00000004399.12	PLXND1	chr3:129555174-129606818	MB468_CTRL	MB468_W2	OK	7.06728	7.50334	0.0863765	0.116495	0.75035	0.868744	no
ENSG00000004455.16	AK2	111.251	112.851	124.735	93.5984	97.9391	113.486	ENSG00000004455.16	AK2	chr1:32986951-33080996	MB468_CTRL	MB468_W2	OK	116.279	101.674	-0.193634	-0.723261	0.1633	0.340111	no
ENSG00000004468.12	CD38	0.048511	0.334363	0	0	0	0.244972	ENSG00000004468.12	CD38	chr4:15778274-15853230	MB468_CTRL	MB468_W2	NOTEST	0.127625	0.0816573	-0.644255	0	1	1	no
ENSG00000004478.7	FKBP4	20.0948	28.9316	25.3258	24.2178	30.6547	33.7028	ENSG00000004478.7	FKBP4	chr12:1946053-2941140	MB468_CTRL	MB468_W2	OK	24.7841	29.5251	0.252529	0.367356	0.39365	0.598923	no
ENSG00000004487.15	KDM1A	54.1587	52.4798	56.4062	38.9653	48.3527	45.7265	ENSG00000004487.15	KDM1A	chr1:23019447-23177808	MB468_CTRL	MB468_W2	OK	54.3483	44.3481	-0.29336	-0.837158	0.11145	0.261884	no
ENSG00000004534.14	RBM6	13.739	9.21849	16.6921	26.2541	22.4793	18.6267	ENSG00000004534.14	RBM6	chr3:49940006-50189075	MB468_CTRL	MB468_W2	OK	13.2165	22.4533	0.764588	1.25839	0.0159	0.0609079	no
ENSG00000004660.14	CAMKK1	0.253614	0.338436	0.387665	0.452789	0.696885	0.580013	ENSG00000004660.14	CAMKK1	chr17:3860314-3894891	MB468_CTRL	MB468_W2	NOTEST	0.326572	0.576562	0.820076	0	1	1	no
ENSG00000004700.15	RECQL	23.97	26.558	26.9831	12.5831	10.2972	13.4329	ENSG00000004700.15	RECQL	chr12:21437614-21501669	MB468_CTRL	MB468_W2	OK	25.837	12.1044	-1.09391	-3.6691	5e-05	0.000470501	yes
ENSG00000004766.15	VPS50	4.24978	6.67955	3.71136	3.51153	5.4524	16.3598	ENSG00000004766.15	VPS50	chr7:93232339-93361121	MB468_CTRL	MB468_W2	OK	4.88023	8.44123	0.790505	0.642409	0.0864	0.218788	no
ENSG00000004776.11	HSPB6	0	0.267307	0.255199	0.79768	0	0	ENSG00000004776.11	HSPB6	chr19:35754565-35758079	MB468_CTRL	MB468_W2	NOTEST	0.174169	0.265893	0.610362	0	1	1	no
ENSG00000004777.18	ARHGAP33	4.15972	5.01514	7.10129	14.2454	19.0632	10.5975	ENSG00000004777.18	ARHGAP33	chr19:35774531-35797902	MB468_CTRL	MB468_W2	OK	5.42538	14.6354	1.43166	1.96794	5e-05	0.000470501	yes
ENSG00000004779.9	NDUFAB1	105.303	98.141	116.788	149.213	189.133	191.167	ENSG00000004779.9	NDUFAB1	chr16:23581001-23596356	MB468_CTRL	MB468_W2	OK	106.744	176.504	0.725544	4.57112	5e-05	0.000470501	yes
ENSG00000004799.7	PDK4	0.522817	1.10056	1.9896	1.19144	3.98064	0.554025	ENSG00000004799.7	PDK4	chr7:95583498-95596491	MB468_CTRL	MB468_W2	NOTEST	1.20433	1.9087	0.664362	0	1	1	no
ENSG00000004809.13	SLC22A16	0	0	0	0	0	0	ENSG00000004809.13	SLC22A16	chr6:110424686-110476641	MB468_CTRL	MB468_W2	NOTEST	0	0	0	0	1	1	no
ENSG00000004838.13	ZMYND10	0.535133	0.839488	0.726237	0.744193	0.449049	1.72397	ENSG00000004838.13	ZMYND10	chr3:50341105-50346852	MB468_CTRL	MB468_W2	NOTEST	0.700286	0.972403	0.473609	0	1	1	no
ENSG00000004846.16	ABCB5	0	0	0	0	0	0	ENSG00000004846.16	ABCB5	chr7:20615206-20777038	MB468_CTRL	MB468_W2	NOTEST	0	0	0	0	1	1	no
ENSG00000004848.7	ARX	0.222205	0.669993	0.623147	0.176071	0	0.675559	ENSG00000004848.7	ARX	chrX:25003693-25016420	MB468_CTRL	MB468_W2	NOTEST	0.505115	0.283877	-0.831348	0	1	1	no
ENSG00000004864.13	SLC25A13	17.9787	16.6439	23.4338	35.7543	14.1311	11.6915	ENSG00000004864.13	SLC25A13	chr7:96120219-96322147	MB468_CTRL	MB468_W2	OK	19.3521	20.5256	0.0849357	0.202224	0.7188	0.848567	no
ENSG00000004866.19	ST7	8.43836	11.7286	7.95456	15.6889	11.1219	10.7545	ENSG00000004866.19	ST7	chr7:116952445-117230103	MB468_CTRL	MB468_W2	OK	9.37384	12.5218	0.417728	0.382828	0.2188	0.412778	no
ENSG00000004897.11	CDC27	20.8488	26.6646	19.3741	24.9607	16.1553	19.7489	ENSG00000004897.11	CDC27	chr17:47117702-47189422	MB468_CTRL	MB468_W2	OK	22.2959	20.2883	-0.136127	-0.256459	0.5846	0.755155	no
ENSG00000004939.13	SLC4A1	0	0	0	0	0	0	ENSG00000004939.13	SLC4A1	chr17:44248384-44268141	MB468_CTRL	MB468_W2	NOTEST	0	0	0	0	1	1	no
ENSG00000004948.13	CALCR	0	0	0	0	0	0	ENSG00000004948.13	CALCR	chr7:93424486-93574730	MB468_CTRL	MB468_W2	NOTEST	0	0	0	0	1	1	no
ENSG00000004961.14	HCCS	30.6392	27.7513	30.8355	14.1613	21.0083	21.0591	ENSG00000004961.14	HCCS	chrX:11111300-11123078	MB468_CTRL	MB468_W2	OK	29.742	18.7429	-0.666155	-2.73584	5e-05	0.000470501	yes
ENSG00000004975.11	DVL2	12.1032	9.37553	12.4882	13.076	32.3647	25.8393	ENSG00000004975.11	DVL2	chr17:7225340-7234545	MB468_CTRL	MB468_W2	OK	11.3223	23.76	1.06937	2.19239	5e-05	0.000470501	yes
ENSG00000005001.9	PRSS22	7.97682	8.78295	3.95987	12.179	19.7368	12.7995	ENSG00000005001.9	PRSS22	chr16:2852726-2859726	MB468_CTRL	MB468_W2	OK	6.90655	14.9051	1.10977	1.89179	0.0007	0.00479022	yes
ENSG00000005007.12	UPF1	58.0564	61.2253	58.174	37.872	50.9176	65.525	ENSG00000005007.12	UPF1	chr19:18831937-18868236	MB468_CTRL	MB468_W2	OK	59.1519	51.4382	-0.201583	-0.744972	0.15815	0.332541	no
ENSG00000005020.12	SKAP2	21.2407	20.359	18.5176	18.4223	12.0483	10.0126	ENSG00000005020.12	SKAP2	chr7:26667061-26995239	MB468_CTRL	MB468_W2	OK	20.0391	13.4944	-0.570455	-1.36975	0.01855	0.0685723	no
ENSG00000005022.5	SLC25A5	698.125	770.335	816.554	354.403	404.169	428.01	ENSG00000005022.5	SLC25A5	chrX:119466033-119471319	MB468_CTRL	MB468_W2	OK	761.671	395.527	-0.945392	-5.60828	5e-05	0.000470501	yes
ENSG00000005059.15	CCDC109B	23.7768	15.4169	9.5415	4.79619	42.5651	21.5636	ENSG00000005059.15	CCDC109B	chr4:109560204-109703583	MB468_CTRL	MB468_W2	OK	16.2451	22.975	0.50006	0.550676	0.38875	0.594404	no
ENSG00000005073.5	HOXA11	0.942701	0.586233	0.529128	0.42548	0.882254	0.991334	ENSG00000005073.5	HOXA11	chr7:27181509-27193448	MB468_CTRL	MB468_W2	NOTEST	0.686021	0.766356	0.159762	0	1	1	no
ENSG00000005075.15	POLR2J	49.2369	41.325	51.5714	35.1662	42.884	44.5069	ENSG00000005075.15	POLR2J	chr7:102464928-102478907	MB468_CTRL	MB468_W2	OK	47.3777	40.8524	-0.21379	-0.975897	0.08515	0.216265	no
ENSG00000005100.12	DHX33	10.2745	12.8852	11.7871	7.96571	13.8083	12.9794	ENSG00000005100.12	DHX33	chr17:5282264-5469060	MB468_CTRL	MB468_W2	OK	11.6489	11.5845	-0.00800769	-0.0133576	0.9803	0.990652	no
ENSG00000005102.12	MEOX1	0	0	0	0	0	0	ENSG00000005102.12	MEOX1	chr17:43640387-43661954	MB468_CTRL	MB468_W2	NOTEST	0	0	0	0	1	1	no
ENSG00000005108.15	THSD7A	0.758709	0.909036	1.32217	0.819177	1.0937	2.5374	ENSG00000005108.15	THSD7A	chr7:11180901-11832198	MB468_CTRL	MB468_W2	NOTEST	0.996637	1.48343	0.573792	0	1	1	no
ENSG00000005156.11	LIG3	11.4951	19.4312	17.5258	16.2246	17.3345	20.0618	ENSG00000005156.11	LIG3	chr17:34927858-35121522	MB468_CTRL	MB468_W2	OK	16.1507	17.8736	0.146234	0.243337	0.59695	0.764053	no
ENSG00000005175.9	RPAP3	22.0657	20.1445	22.5578	10.263	15.0511	18.7197	ENSG00000005175.9	RPAP3	chr12:47661248-47706061	MB468_CTRL	MB468_W2	OK	21.5893	14.678	-0.556665	-1.40151	0.0192	0.0705341	no
ENSG00000005187.11	ACSM3	0.387596	0	0.173626	0.399046	0	0	ENSG00000005187.11	ACSM3	chr16:20610242-20925006	MB468_CTRL	MB468_W2	NOTEST	0.187074	0.133015	-0.492016	0	1	1	no
ENSG00000005189.19	AC004381.6	2.5216	3.19962	3.91707	6.85089	3.5204	8.79143	ENSG00000005189.19	AC004381.6	chr16:20610242-20925006	MB468_CTRL	MB468_W2	OK	3.21276	6.38757	0.991454	0.766314	0.01775	0.0662498	no
ENSG00000005194.14	CIAPIN1	32.7401	33.9626	40.0135	23.1021	31.3423	35.9021	ENSG00000005194.14	CIAPIN1	chr16:57428168-57487327	MB468_CTRL	MB468_W2	OK	35.572	30.1155	-0.240238	-0.588557	0.28405	0.489653	no
ENSG00000005206.16	SPPL2B	7.37168	9.48271	11.5336	26.1935	38.7166	45.7236	ENSG00000005206.16	SPPL2B	chr19:2252251-2354806	MB468_CTRL	MB468_W2	OK	9.46267	36.8779	1.96244	2.93566	5e-05	0.000470501	yes
ENSG00000005238.19	FAM214B	4.97644	4.28199	4.78123	5.30106	9.98487	4.74397	ENSG00000005238.19	FAM214B	chr9:35104111-35116341	MB468_CTRL	MB468_W2	OK	4.67989	6.67663	0.512647	1.21634	0.0186	0.0687156	no
ENSG00000005243.9	COPZ2	0	0	0.274997	0	0	0	ENSG00000005243.9	COPZ2	chr17:48026166-48038030	MB468_CTRL	MB468_W2	NOTEST	0.0916657	0	#NAME?	0	1	1	no
ENSG00000005249.12	PRKAR2B	15.5039	15.236	17.7301	13.0263	13.8554	19.345	ENSG00000005249.12	PRKAR2B	chr7:107044648-107161811	MB468_CTRL	MB468_W2	OK	16.1567	15.4089	-0.0683656	-0.324861	0.5556	0.733872	no
ENSG00000005302.17	MSL3	14.9245	13.8598	15.2676	29.119	26.3317	9.42399	ENSG00000005302.17	MSL3	chrX:11758158-11775753	MB468_CTRL	MB468_W2	OK	14.684	21.6249	0.558452	1.23268	0.04535	0.13659	no
ENSG00000005339.14	CREBBP	13.8674	16.1243	14.5707	14.4207	12.6646	11.8091	ENSG00000005339.14	CREBBP	chr16:3725053-3880726	MB468_CTRL	MB468_W2	OK	14.8541	12.9648	-0.196263	-0.166384	0.5621	0.73877	no
ENSG00000005379.15	TSPOAP1	2.33206	0.481395	0.899965	0.12158	1.97165	1.88131	ENSG00000005379.15	TSPOAP1	chr17:58301227-58417595	MB468_CTRL	MB468_W2	NOTEST	1.23781	1.32485	0.0980369	0	1	1	no
ENSG00000005421.8	PON1	0	0	0	0	0	0	ENSG00000005421.8	PON1	chr7:95297675-95324707	MB468_CTRL	MB468_W2	NOTEST	0	0	0	0	1	1	no
ENSG00000005436.13	GCFC2	13.5107	11.5052	11.1558	13.7434	12.552	16.5375	ENSG00000005436.13	GCFC2	chr2:75646782-75710989	MB468_CTRL	MB468_W2	OK	12.0573	14.2776	0.243853	0.486	0.32095	0.528552	no
ENSG00000005448.16	WDR54	3.01371	3.50528	3.56187	0.952022	7.36867	3.99644	ENSG00000005448.16	WDR54	chr2:74421677-74425755	MB468_CTRL	MB468_W2	OK	3.36029	4.10571	0.289049	0.231243	0.493	0.685175	no
ENSG00000005469.11	CROT	4.58313	5.39781	4.80472	1.08617	3.18855	1.34107	ENSG00000005469.11	CROT	chr7:87345680-87399795	MB468_CTRL	MB468_W2	OK	4.92855	1.87193	-1.39664	-1.37857	0.00225	0.0125789	yes
ENSG00000005471.15	ABCB4	0	0	0.037527	0	0.116846	0	ENSG00000005471.15	ABCB4	chr7:87401696-87480435	MB468_CTRL	MB468_W2	NOTEST	0.012509	0.0389487	1.63861	0	1	1	no
ENSG00000005483.20	KMT2E	11.9933	12.6342	15.4703	28.2763	40.4971	16.4639	ENSG00000005483.20	KMT2E	chr7:105013424-105399308	MB468_CTRL	MB468_W2	OK	13.3659	28.4124	1.08796	1.63074	0.0068	0.0308534	yes
ENSG00000005486.16	RHBDD2	24.3226	22.3605	17.7217	18.8829	18.4576	24.2311	ENSG00000005486.16	RHBDD2	chr7:75842601-75888926	MB468_CTRL	MB468_W2	OK	21.4683	20.5238	-0.0649037	-0.160849	0.7509	0.868996	no
ENSG00000005513.9	SOX8	0.243813	0.0819509	0.0833279	0	0.284975	0.238039	ENSG00000005513.9	SOX8	chr16:981807-986979	MB468_CTRL	MB468_W2	NOTEST	0.136364	0.174338	0.354426	0	1	1	no
ENSG00000005700.14	IBTK	21.532	22.426	23.5337	22.6404	18.8635	17.2675	ENSG00000005700.14	IBTK	chr6:82169982-82247754	MB468_CTRL	MB468_W2	OK	22.4972	19.5905	-0.199597	-1.12664	0.04255	0.130288	no
ENSG00000005801.16	ZNF195	11.2235	10.91	7.51676	20.7568	10.0117	15.5261	ENSG00000005801.16	ZNF195	chr11:3336720-3379222	MB468_CTRL	MB468_W2	OK	9.88341	15.4315	0.6428	0.9969	0.0103	0.0430856	yes
ENSG00000005810.17	MYCBP2	26.5066	31.809	26.5101	10.6199	17.9788	29.4337	ENSG00000005810.17	MYCBP2	chr13:76990659-77327050	MB468_CTRL	MB468_W2	OK	28.2752	19.3441	-0.547644	-0.658118	0.21705	0.410491	no
ENSG00000005812.10	FBXL3	34.3604	36.9852	34.2846	23.0125	26.5887	25.5641	ENSG00000005812.10	FBXL3	chr13:76990659-77327050	MB468_CTRL	MB468_W2	OK	35.2101	25.0551	-0.490884	-1.33385	0.01265	0.0507384	no
ENSG00000005844.17	ITGAL	0.370673	0.980921	0.273859	6.88851	0.576926	0.0891895	ENSG00000005844.17	ITGAL	chr16:30472657-30523185	MB468_CTRL	MB468_W2	NOTEST	0.541818	2.51821	2.21652	0	1	1	no
ENSG00000005882.11	PDK2	3.1977	5.58622	5.18156	2.79849	3.82179	5.81775	ENSG00000005882.11	PDK2	chr17:50094736-50129882	MB468_CTRL	MB468_W2	OK	4.65516	4.14601	-0.167107	-0.138907	0.68125	0.823929	no
ENSG00000005884.17	ITGA3	41.8186	42.7606	43.8526	43.157	55.9638	35.5188	ENSG00000005884.17	ITGA3	chr17:50055967-50090481	MB468_CTRL	MB468_W2	OK	42.8106	44.8799	0.0681001	0.18045	0.7324	0.856785	no
ENSG00000005889.15	ZFX	8.71699	10.9609	14.2969	6.90869	13.7638	16.6274	ENSG00000005889.15	ZFX	chrX:24146224-24216255	MB468_CTRL	MB468_W2	OK	11.3249	12.4333	0.134712	0.234299	0.6322	0.790536	no
ENSG00000005893.15	LAMP2	89.8609	89.0361	95.4961	59.8458	55.6295	57.0297	ENSG00000005893.15	LAMP2	chrX:120427826-120469365	MB468_CTRL	MB468_W2	OK	91.4644	57.5017	-0.669607	-3.86229	5e-05	0.000470501	yes
ENSG00000005961.17	ITGA2B	1.27393	0.279635	0.852145	0.118974	0.155506	4.23336	ENSG00000005961.17	ITGA2B	chr17:44372179-44389505	MB468_CTRL	MB468_W2	NOTEST	0.801903	1.50261	0.905974	0	1	1	no
ENSG00000005981.12	ASB4	0	0	0	0	0	0	ENSG00000005981.12	ASB4	chr7:95478443-95540232	MB468_CTRL	MB468_W2	NOTEST	0	0	0	0	1	1	no
ENSG00000006007.11	GDE1	36.5272	36.1204	33.5543	25.6127	32.8152	36.3838	ENSG00000006007.11	GDE1	chr16:19501688-19522145	MB468_CTRL	MB468_W2	OK	35.4006	31.6039	-0.163674	-0.770836	0.16315	0.339972	no
ENSG00000006015.17	C19orf60	32.7496	28.0266	34.0393	34.713	36.5056	41.2498	ENSG00000006015.17	C19orf60	chr19:18571729-18621039	MB468_CTRL	MB468_W2	OK	31.6052	37.4895	0.246324	0.486903	0.39015	0.595578	no
ENSG00000006016.10	CRLF1	1.45284	3.494	2.10854	6.00231	4.36445	4.13652	ENSG00000006016.10	CRLF1	chr19:18571729-18621039	MB468_CTRL	MB468_W2	OK	2.3518	4.83443	1.03958	0.562394	0.21305	0.405668	no
ENSG00000006025.11	OSBPL7	2.31686	2.14715	1.51873	2.55151	8.79771	7.88242	ENSG00000006025.11	OSBPL7	chr17:47807371-47821834	MB468_CTRL	MB468_W2	OK	1.99425	6.41055	1.6846	1.52908	5e-05	0.000470501	yes
ENSG00000006042.11	TMEM98	0	0	0.145439	0	0	0	ENSG00000006042.11	TMEM98	chr17:32927909-32945106	MB468_CTRL	MB468_W2	NOTEST	0.0484797	0	#NAME?	0	1	1	no
ENSG00000006047.12	YBX2	6.91879	9.38015	8.41991	11.014	8.6775	12.4856	ENSG00000006047.12	YBX2	chr17:7281666-7294615	MB468_CTRL	MB468_W2	OK	8.23962	10.7257	0.380425	0.886471	0.0982	0.239629	no
ENSG00000006062.13	MAP3K14	3.02436	3.99699	4.08768	5.10006	5.79465	6.12339	ENSG00000006062.13	MAP3K14	chr17:45190930-45317040	MB468_CTRL	MB468_W2	OK	3.70301	5.6727	0.615338	1.30598	0.01515	0.0586417	no
ENSG00000006071.12	ABCC8	0	0	0	0	0	1.20887	ENSG00000006071.12	ABCC8	chr11:17392884-17476845	MB468_CTRL	MB468_W2	NOTEST	0	0.402957	inf	0	1	1	no
ENSG00000006116.3	CACNG3	0.0724359	0.0713954	0	0	0	0	ENSG00000006116.3	CACNG3	chr16:24255552-24362801	MB468_CTRL	MB468_W2	NOTEST	0.0479438	0	#NAME?	0	1	1	no
ENSG00000006118.14	TMEM132A	38.6419	44.1664	44.8987	103.473	145.504	154.522	ENSG00000006118.14	TMEM132A	chr11:60913165-60952530	MB468_CTRL	MB468_W2	OK	42.569	134.5	1.65973	4.26236	5e-05	0.000470501	yes
ENSG00000006125.16	AP2B1	25.6301	26.7794	25.1316	14.8229	21.6467	17.9837	ENSG00000006125.16	AP2B1	chr17:35574794-35868891	MB468_CTRL	MB468_W2	OK	25.847	18.1511	-0.509941	-0.916359	0.03435	0.110662	no
ENSG00000006194.9	ZNF263	17.4547	16.43	19.0857	13.5534	24.1573	18.2059	ENSG00000006194.9	ZNF263	chr16:3263742-3318852	MB468_CTRL	MB468_W2	OK	17.6568	18.6389	0.0780946	0.189805	0.74075	0.862725	no
ENSG00000006210.6	CX3CL1	29.5818	33.4843	36.4146	17.5586	26.3305	23.9417	ENSG00000006210.6	CX3CL1	chr16:57372457-57385048	MB468_CTRL	MB468_W2	OK	33.1602	22.6103	-0.552474	-2.89944	5e-05	0.000470501	yes
ENSG00000006282.20	SPATA20	6.2456	6.18292	8.01128	10.4376	9.1399	8.04744	ENSG00000006282.20	SPATA20	chr17:50532542-50555852	MB468_CTRL	MB468_W2	OK	6.81327	9.20832	0.434591	0.54943	0.1142	0.266179	no
ENSG00000006283.17	CACNA1G	0.142135	0	0.0433827	0	0.149208	0	ENSG00000006283.17	CACNA1G	chr17:50556206-50631940	MB468_CTRL	MB468_W2	NOTEST	0.0618391	0.049736	-0.314229	0	1	1	no
ENSG00000006327.13	TNFRSF12A	68.6843	81.3953	74.7706	38.9746	53.7855	46.293	ENSG00000006327.13	TNFRSF12A	chr16:3014711-3022383	MB468_CTRL	MB468_W2	OK	74.9501	46.351	-0.693329	-3.04912	5e-05	0.000470501	yes
ENSG00000006377.10	DLX6	0	0	0	0	0	0	ENSG00000006377.10	DLX6	chr7:96955140-97014066	MB468_CTRL	MB468_W2	NOTEST	0	0	0	0	1	1	no
ENSG00000006432.15	MAP3K9	5.99207	8.28201	8.21071	4.55105	11.0235	7.68964	ENSG00000006432.15	MAP3K9	chr14:70722525-70809534	MB468_CTRL	MB468_W2	OK	7.49493	7.75474	0.0491629	0.128869	0.7849	0.889251	no
ENSG00000006451.7	RALA	70.7371	73.946	71.751	43.5835	50.8516	58.8505	ENSG00000006451.7	RALA	chr7:39623482-39708124	MB468_CTRL	MB468_W2	OK	72.1447	51.0952	-0.497705	-1.75137	0.00165	0.00974473	yes
ENSG00000006453.13	BAIAP2L1	15.7548	16.8858	18.0403	15.7506	17.0388	20.3792	ENSG00000006453.13	BAIAP2L1	chr7:98252378-98401068	MB468_CTRL	MB468_W2	OK	16.8937	17.7229	0.0691306	0.238117	0.66385	0.812131	no
ENSG00000006459.10	KDM7A	2.19695	1.88805	1.15012	1.29402	2.17233	4.59308	ENSG00000006459.10	KDM7A	chr7:140084745-140177035	MB468_CTRL	MB468_W2	OK	1.74504	2.68648	0.622456	0.545908	0.3049	0.511778	no
ENSG00000006468.13	ETV1	0.971882	1.11899	0.335642	0.143499	2.78184	2.16664	ENSG00000006468.13	ETV1	chr7:13891227-13991425	MB468_CTRL	MB468_W2	NOTEST	0.808839	1.69732	1.06934	0	1	1	no
ENSG00000006530.15	AGK	5.4223	9.04025	8.34342	8.3679	10.2081	8.29373	ENSG00000006530.15	AGK	chr7:141529202-141702153	MB468_CTRL	MB468_W2	OK	7.60199	8.95659	0.236573	0.363591	0.47205	0.66835	no
ENSG00000006534.15	ALDH3B1	5.0702	6.69053	5.79226	3.67542	4.50385	5.23636	ENSG00000006534.15	ALDH3B1	chr11:68008577-68030461	MB468_CTRL	MB468_W2	OK	5.851	4.47188	-0.387802	-0.614053	0.184	0.368765	no
ENSG00000006555.10	TTC22	5.88817	5.86955	6.58295	5.76122	10.9374	7.22905	ENSG00000006555.10	TTC22	chr1:54779711-54801267	MB468_CTRL	MB468_W2	OK	6.11356	7.97589	0.383634	0.833741	0.1191	0.273787	no
ENSG00000006576.16	PHTF2	7.14231	6.43582	7.79324	6.92271	3.90862	9.10136	ENSG00000006576.16	PHTF2	chr7:77798791-77957503	MB468_CTRL	MB468_W2	OK	7.12379	6.64423	-0.100544	-0.195379	0.68325	0.825177	no
ENSG00000006606.8	CCL26	0	0	0	0	0	0	ENSG00000006606.8	CCL26	chr7:75769532-75789896	MB468_CTRL	MB468_W2	NOTEST	0	0	0	0	1	1	no
ENSG00000006607.13	FARP2	14.5817	18.0891	18.2913	14.5168	13.0818	13.2147	ENSG00000006607.13	FARP2	chr2:241356242-241509730	MB468_CTRL	MB468_W2	OK	16.9874	13.6044	-0.320385	-0.591746	0.1659	0.343904	no
ENSG00000006611.15	USH1C	0	0	0	0	0	0	ENSG00000006611.15	USH1C	chr11:17493894-17544416	MB468_CTRL	MB468_W2	NOTEST	0	0	0	0	1	1	no
ENSG00000006625.17	GGCT	137.855	145.659	143.166	59.2276	90.6684	75.9155	ENSG00000006625.17	GGCT	chr7:30496620-30634033	MB468_CTRL	MB468_W2	OK	142.227	75.2705	-0.918035	-2.59255	5e-05	0.000470501	yes
ENSG00000006634.7	DBF4	27.325	28.7262	28.792	52.1929	41.9142	34.4288	ENSG00000006634.7	DBF4	chr7:87833567-87909541	MB468_CTRL	MB468_W2	OK	28.2811	42.8453	0.599301	1.76933	0.00205	0.0116545	yes
ENSG00000006638.11	TBXA2R	0.715592	0.436591	0.21987	0.54759	0	0	ENSG00000006638.11	TBXA2R	chr19:3594505-3606840	MB468_CTRL	MB468_W2	NOTEST	0.457351	0.18253	-1.32517	0	1	1	no
ENSG00000006652.13	IFRD1	33.7625	44.6825	43.2082	38.6489	44.8657	37.2831	ENSG00000006652.13	IFRD1	chr7:112422967-112491062	MB468_CTRL	MB468_W2	OK	40.5511	40.2659	-0.0101822	-0.0407455	0.93285	0.96786	no
ENSG00000006659.12	LGALS14	0	0	0	0	0	0	ENSG00000006659.12	LGALS14	chr19:39704305-39709444	MB468_CTRL	MB468_W2	NOTEST	0	0	0	0	1	1	no
ENSG00000006695.10	COX10	9.02122	12.6116	10.3248	7.84241	11.0992	11.126	ENSG00000006695.10	COX10	chr17:14069495-14208677	MB468_CTRL	MB468_W2	OK	10.6525	10.0225	-0.0879501	-0.2584	0.6458	0.799874	no
ENSG00000006704.10	GTF2IRD1	6.18178	6.84532	7.10187	7.24587	5.71758	10.0108	ENSG00000006704.10	GTF2IRD1	chr7:74453789-74602604	MB468_CTRL	MB468_W2	OK	6.70966	7.65807	0.190742	0.466756	0.3432	0.551612	no
ENSG00000006712.14	PAF1	43.5592	39.8588	48.1363	35.7281	27.2563	24.413	ENSG00000006712.14	PAF1	chr19:39385851-39391195	MB468_CTRL	MB468_W2	OK	43.8514	29.1325	-0.589996	-1.49004	0.0081	0.0354697	yes
ENSG00000006715.15	VPS41	32.7802	39.5914	38.9973	27.8999	21.2883	23.4807	ENSG00000006715.15	VPS41	chr7:38722962-38932394	MB468_CTRL	MB468_W2	OK	37.123	24.2229	-0.615938	-1.50296	0.00535	0.0254396	yes
ENSG00000006740.16	ARHGAP44	0	0	0	0.0985618	0	0	ENSG00000006740.16	ARHGAP44	chr17:12665889-12991643	MB468_CTRL	MB468_W2	NOTEST	0	0.0328539	inf	0	1	1	no
ENSG00000006744.18	ELAC2	28.7384	37.6875	28.1823	26.5214	33.6481	34.6419	ENSG00000006744.18	ELAC2	chr17:12992390-13018187	MB468_CTRL	MB468_W2	OK	31.5361	31.6038	0.00309465	0.00948838	0.985	0.992633	no
ENSG00000006747.14	SCIN	0.557934	1.24796	0.66109	1.03957	0	0.759603	ENSG00000006747.14	SCIN	chr7:12570124-12660179	MB468_CTRL	MB468_W2	NOTEST	0.822329	0.599726	-0.455414	0	1	1	no
ENSG00000006756.15	ARSD	9.11043	11.9039	10.8782	8.85196	6.10293	8.01186	ENSG00000006756.15	ARSD	chrX:2903969-2929351	MB468_CTRL	MB468_W2	OK	10.6308	7.65558	-0.473672	-0.803138	0.1191	0.273787	no
ENSG00000006757.11	PNPLA4	4.5171	3.82313	5.67219	2.49812	3.53199	4.87974	ENSG00000006757.11	PNPLA4	chrX:7898246-7927739	MB468_CTRL	MB468_W2	OK	4.67081	3.63661	-0.361077	-0.496327	0.3761	0.583311	no
ENSG00000006788.12	MYH13	0	0	0	0	0	0	ENSG00000006788.12	MYH13	chr17:10291819-10373130	MB468_CTRL	MB468_W2	NOTEST	0	0	0	0	1	1	no
ENSG00000006831.9	ADIPOR2	15.6346	20.7193	20.3412	10.8098	15.0585	15.636	ENSG00000006831.9	ADIPOR2	chr12:1688573-1788678	MB468_CTRL	MB468_W2	OK	18.8984	13.8348	-0.449964	-1.24312	0.01935	0.0709145	no
ENSG00000006837.11	CDKL3	1.31292	0.612644	1.54675	1.58162	2.84283	0.448155	ENSG00000006837.11	CDKL3	chr5:134114710-134371047	MB468_CTRL	MB468_W2	NOTEST	1.15744	1.6242	0.488796	0	1	1	no
ENSG00000007001.12	UPP2	0	0	0	0	0	0	ENSG00000007001.12	UPP2	chr2:157876701-158136154	MB468_CTRL	MB468_W2	NOTEST	0	0	0	0	1	1	no
ENSG00000007047.14	MARK4	7.9239	7.36253	9.13139	9.06345	8.10873	12.7716	ENSG00000007047.14	MARK4	chr19:45071499-45305283	MB468_CTRL	MB468_W2	OK	8.13928	9.98124	0.294319	0.490639	0.33415	0.542707	no
ENSG00000007062.11	PROM1	34.9288	35.2518	34.8411	55.2875	41.0167	45.8666	ENSG00000007062.11	PROM1	chr4:15960242-16084378	MB468_CTRL	MB468_W2	OK	35.0072	47.3903	0.436938	1.52041	0.004	0.0200833	yes
ENSG00000007080.10	CCDC124	47.1815	47.9837	55.0451	29.8846	29.4498	39.4127	ENSG00000007080.10	CCDC124	chr19:17933015-17943991	MB468_CTRL	MB468_W2	OK	50.0701	32.9157	-0.605173	-3.39127	5e-05	0.000470501	yes
ENSG00000007168.12	PAFAH1B1	29.9819	28.3444	27.9698	27.8632	25.4732	21.695	ENSG00000007168.12	PAFAH1B1	chr17:2593209-2685615	MB468_CTRL	MB468_W2	OK	28.7654	25.0105	-0.201801	-0.653683	0.22605	0.421724	no
ENSG00000007171.16	NOS2	0	0	0	0	0	0	ENSG00000007171.16	NOS2	chr17:27756765-27894752	MB468_CTRL	MB468_W2	NOTEST	0	0	0	0	1	1	no
ENSG00000007174.17	DNAH9	0	0	0	0	0	0	ENSG00000007174.17	DNAH9	chr17:11598430-11997510	MB468_CTRL	MB468_W2	NOTEST	0	0	0	0	1	1	no
ENSG00000007202.14	KIAA0100	53.2107	55.071	56.2635	55.2174	74.8695	63.6987	ENSG00000007202.14	KIAA0100	chr17:28455751-28645454	MB468_CTRL	MB468_W2	OK	54.8484	64.5952	0.235978	0.435611	0.4068	0.610917	no
ENSG00000007216.14	SLC13A2	0.107311	0	0	0	0	0	ENSG00000007216.14	SLC13A2	chr17:28455751-28645454	MB468_CTRL	MB468_W2	NOTEST	0.0357705	0	#NAME?	0	1	1	no
ENSG00000007237.18	GAS7	8.25001	8.05026	10.7893	6.87479	11.156	21.0421	ENSG00000007237.18	GAS7	chr17:9910608-10198551	MB468_CTRL	MB468_W2	OK	9.02987	13.0243	0.528428	0.819216	0.08765	0.221082	no
ENSG00000007255.10	TRAPPC6A	15.9021	9.29646	14.522	11.2365	6.06663	10.5592	ENSG00000007255.10	TRAPPC6A	chr19:45071499-45305283	MB468_CTRL	MB468_W2	OK	13.2402	9.28745	-0.511568	-0.551367	0.3044	0.51129	no
ENSG00000007264.14	MATK	0	0	0	0	0	0	ENSG00000007264.14	MATK	chr19:3777969-3802129	MB468_CTRL	MB468_W2	NOTEST	0	0	0	0	1	1	no
ENSG00000007312.12	CD79B	0	0	0	0	0	0	ENSG00000007312.12	CD79B	chr17:63928739-63932354	MB468_CTRL	MB468_W2	NOTEST	0	0	0	0	1	1	no
ENSG00000007314.11	SCN4A	0	0	0	0	0	0.0587821	ENSG00000007314.11	SCN4A	chr17:63938553-63972918	MB468_CTRL	MB468_W2	NOTEST	0	0.019594	inf	0	1	1	no
ENSG00000007341.18	ST7L	14.618	13.9449	12.4369	16.3982	28.0442	14.6208	ENSG00000007341.18	ST7L	chr1:112466540-112671619	MB468_CTRL	MB468_W2	OK	13.6666	19.6877	0.526643	0.709188	0.1555	0.328665	no
ENSG00000007350.16	TKTL1	0	0	0	0	0	0	ENSG00000007350.16	TKTL1	chrX:154257537-154330350	MB468_CTRL	MB468_W2	NOTEST	0	0	0	0	1	1	no
ENSG00000007372.20	PAX6	8.33708	6.15558	6.85802	4.71802	6.13724	10.1205	ENSG00000007372.20	PAX6	chr11:31784791-32105755	MB468_CTRL	MB468_W2	OK	7.11689	6.99192	-0.0255586	-0.019086	0.9516	0.97621	no
ENSG00000007376.7	RPUSD1	17.4763	19.6448	15.3597	23.2868	17.5139	25.0921	ENSG00000007376.7	RPUSD1	chr16:784973-800737	MB468_CTRL	MB468_W2	OK	17.4936	21.9643	0.328333	0.611051	0.2419	0.441298	no
ENSG00000007384.15	RHBDF1	7.96468	8.76791	8.70846	24.8526	21.8339	24.6016	ENSG00000007384.15	RHBDF1	chr16:58058-76355	MB468_CTRL	MB468_W2	OK	8.48035	23.7627	1.4865	2.9729	5e-05	0.000470501	yes
ENSG00000007392.16	LUC7L	12.9074	14.0428	14.6954	21.205	26.737	32.813	ENSG00000007392.16	LUC7L	chr16:188968-229463	MB468_CTRL	MB468_W2	OK	13.8819	26.9183	0.955389	2.33932	5e-05	0.000470501	yes
ENSG00000007402.11	CACNA2D2	0.84466	0.398128	0.165296	0.105303	0.855987	0	ENSG00000007402.11	CACNA2D2	chr3:50347329-50504244	MB468_CTRL	MB468_W2	NOTEST	0.469361	0.32043	-0.550689	0	1	1	no
ENSG00000007516.13	BAIAP3	0.04419	0.605107	0.636308	0	0	0	ENSG00000007516.13	BAIAP3	chr16:1333600-1351911	MB468_CTRL	MB468_W2	NOTEST	0.428535	0	#NAME?	0	1	1	no
ENSG00000007520.3	TSR3	39.6813	38.0931	42.9818	23.9736	31.2304	31.9312	ENSG00000007520.3	TSR3	chr16:1333600-1351911	MB468_CTRL	MB468_W2	OK	40.2521	29.0451	-0.470768	-2.06017	0.0006	0.00420723	yes
ENSG00000007541.16	PIGQ	9.20177	10.297	9.16088	13.9462	32.4721	18.4733	ENSG00000007541.16	PIGQ	chr16:566994-584136	MB468_CTRL	MB468_W2	OK	9.55322	21.6305	1.17901	1.19348	0.00035	0.00266809	yes
ENSG00000007545.15	CRAMP1	4.97254	5.13506	5.51165	5.88949	10.6611	6.54211	ENSG00000007545.15	CRAMP1	chr16:1612324-1702280	MB468_CTRL	MB468_W2	OK	5.20642	7.69755	0.564108	0.821932	0.0426	0.130408	no
ENSG00000007866.18	TEAD3	25.7711	25.7107	26.2041	19.7913	16.0401	21.8994	ENSG00000007866.18	TEAD3	chr6:35473596-35497076	MB468_CTRL	MB468_W2	OK	25.8953	19.2436	-0.42831	-1.02543	0.0737	0.195488	no
ENSG00000007908.15	SELE	0	0	0	0	0	0	ENSG00000007908.15	SELE	chr1:169662006-169894267	MB468_CTRL	MB468_W2	NOTEST	0	0	0	0	1	1	no
ENSG00000007923.15	DNAJC11	14.4217	14.8048	16.3648	11.0215	13.5057	14.681	ENSG00000007923.15	DNAJC11	chr1:6624865-6701924	MB468_CTRL	MB468_W2	OK	15.1971	13.0694	-0.217604	-0.608452	0.20155	0.391044	no
ENSG00000007933.12	FMO3	0	0	0	0	0	0.224909	ENSG00000007933.12	FMO3	chr1:171090876-171117819	MB468_CTRL	MB468_W2	NOTEST	0	0.0749698	inf	0	1	1	no
ENSG00000007944.14	MYLIP	5.71255	6.62325	7.06383	12.6115	13.615	11.7388	ENSG00000007944.14	MYLIP	chr6:16129124-16148248	MB468_CTRL	MB468_W2	OK	6.46654	12.6551	0.968653	3.43288	5e-05	0.000470501	yes
ENSG00000007952.17	NOX1	0	0	0	0	0	0	ENSG00000007952.17	NOX1	chrX:100843323-100874345	MB468_CTRL	MB468_W2	NOTEST	0	0	0	0	1	1	no
ENSG00000007968.6	E2F2	24.1546	30.1206	26.0443	30.3487	28.1642	31.3636	ENSG00000007968.6	E2F2	chr1:23506429-23531220	MB468_CTRL	MB468_W2	OK	26.7732	29.9588	0.162193	0.614984	0.2799	0.48471	no
ENSG00000008018.8	PSMB1	133.924	141.842	165.39	97.49	111.525	111.822	ENSG00000008018.8	PSMB1	chr6:170535116-170553341	MB468_CTRL	MB468_W2	OK	147.052	106.946	-0.459448	-3.01483	5e-05	0.000470501	yes
ENSG00000008056.12	SYN1	0.0847412	0.170542	0.496599	0	0	0	ENSG00000008056.12	SYN1	chrX:47561099-47619853	MB468_CTRL	MB468_W2	NOTEST	0.250627	0	#NAME?	0	1	1	no
ENSG00000008083.13	JARID2	11.767	13.0883	13.4785	7.45872	8.04	7.54738	ENSG00000008083.13	JARID2	chr6:15246295-15522040	MB468_CTRL	MB468_W2	OK	12.7779	7.68203	-0.734091	-3.7386	5e-05	0.000470501	yes
ENSG00000008086.11	CDKL5	1.24424	1.86286	2.72035	3.28576	1.34545	7.0178	ENSG00000008086.11	CDKL5	chrX:18425582-18672109	MB468_CTRL	MB468_W2	OK	1.94248	3.883	0.999271	0.381028	0.16445	0.341807	no
ENSG00000008118.9	CAMK1G	0	0	0	0	0	0	ENSG00000008118.9	CAMK1G	chr1:209583716-209613938	MB468_CTRL	MB468_W2	NOTEST	0	0	0	0	1	1	no
ENSG00000008128.22	CDK11A	7.74291	10.6526	7.86748	11.2513	8.50096	8.55422	ENSG00000008128.22	CDK11A	chr1:1702729-1745992	MB468_CTRL	MB468_W2	OK	8.75431	9.4355	0.108105	0.153765	0.7302	0.855549	no
ENSG00000008130.15	NADK	11.3351	13.8585	17.8365	12.9984	20.2245	27.0561	ENSG00000008130.15	NADK	chr1:1751231-1780457	MB468_CTRL	MB468_W2	OK	14.3433	20.093	0.486312	1.20879	0.01185	0.0482049	yes
ENSG00000008196.12	TFAP2B	0.0401538	0.34822	0.0391331	0	0	0	ENSG00000008196.12	TFAP2B	chr6:50818722-50847613	MB468_CTRL	MB468_W2	NOTEST	0.142502	0	#NAME?	0	1	1	no
ENSG00000008226.19	DLEC1	0	0.104667	0	0.145632	0.200835	0	ENSG00000008226.19	DLEC1	chr3:38039204-38137242	MB468_CTRL	MB468_W2	NOTEST	0.0348889	0.115489	1.72692	0	1	1	no
ENSG00000008256.15	CYTH3	16.1536	10.9007	10.5573	23.0128	28.1642	24.9372	ENSG00000008256.15	CYTH3	chr7:6161775-6272644	MB468_CTRL	MB468_W2	OK	12.5372	25.3714	1.01698	2.25166	5e-05	0.000470501	yes
ENSG00000008277.14	ADAM22	0.289805	0.5009	0.573751	1.59424	0.739204	1.98915	ENSG00000008277.14	ADAM22	chr7:87934142-88202889	MB468_CTRL	MB468_W2	NOTEST	0.454818	1.44086	1.66357	0	1	1	no
ENSG00000008282.8	SYPL1	90.8394	89.629	77.671	72.7322	52.6857	48.2162	ENSG00000008282.8	SYPL1	chr7:106090502-106112576	MB468_CTRL	MB468_W2	OK	86.0465	57.878	-0.5721	-3.34633	5e-05	0.000470501	yes
ENSG00000008283.15	CYB561	26.7968	33.2288	34.6124	35.718	51.1318	56.3201	ENSG00000008283.15	CYB561	chr17:63432303-63446378	MB468_CTRL	MB468_W2	OK	31.546	47.7233	0.597238	1.89771	0.00055	0.00392573	yes
ENSG00000008294.20	SPAG9	18.1659	22.0472	25.8293	16.8795	18.0362	27.1416	ENSG00000008294.20	SPAG9	chr17:50962173-51120865	MB468_CTRL	MB468_W2	OK	22.0141	20.6858	-0.0897912	-0.179573	0.7231	0.851203	no
ENSG00000008300.15	CELSR3	0.249805	0.196136	0.244776	0.478171	0.8741	1.89455	ENSG00000008300.15	CELSR3	chr3:48636468-48662915	MB468_CTRL	MB468_W2	NOTEST	0.230239	1.08227	2.23286	0	1	1	no
ENSG00000008311.14	AASS	0	0	0	0	0	0	ENSG00000008311.14	AASS	chr7:122075646-122144280	MB468_CTRL	MB468_W2	NOTEST	0	0	0	0	1	1	no
ENSG00000008323.15	PLEKHG6	2.44223	0.929988	0.94848	1.77894	2.00101	1.90839	ENSG00000008323.15	PLEKHG6	chr12:6310435-6328506	MB468_CTRL	MB468_W2	NOTEST	1.44023	1.89611	0.396743	0	1	1	no
ENSG00000008324.10	SS18L2	4.23754	6.06472	8.90087	12.1525	10.3101	12.383	ENSG00000008324.10	SS18L2	chr3:42547968-42665854	MB468_CTRL	MB468_W2	OK	6.40105	11.6152	0.859635	0.889745	0.1223	0.278869	no
ENSG00000008382.15	MPND	12.0032	4.14489	8.57076	4.58258	2.48944	14.4498	ENSG00000008382.15	MPND	chr19:4343526-4360086	MB468_CTRL	MB468_W2	OK	8.2396	7.17396	-0.199805	-0.233633	0.6996	0.836107	no
ENSG00000008394.12	MGST1	164.829	165.049	191.536	137.972	194.063	172.594	ENSG00000008394.12	MGST1	chr12:16347141-16610594	MB468_CTRL	MB468_W2	OK	173.805	168.21	-0.047204	-0.200241	0.70895	0.84171	no
ENSG00000008405.11	CRY1	9.43424	8.31814	9.73061	7.94265	9.20982	11.9383	ENSG00000008405.11	CRY1	chr12:106991363-107123314	MB468_CTRL	MB468_W2	OK	9.16099	9.69692	0.0820224	0.166282	0.7356	0.859239	no
ENSG00000008438.4	PGLYRP1	0	0	0	0	0	0	ENSG00000008438.4	PGLYRP1	chr19:45995460-46023065	MB468_CTRL	MB468_W2	NOTEST	0	0	0	0	1	1	no
ENSG00000008441.16	NFIX	55.5801	64.0559	57.7339	46.1121	39.6273	48.2142	ENSG00000008441.16	NFIX	chr19:12995607-13098796	MB468_CTRL	MB468_W2	OK	59.1233	44.6512	-0.405028	-2.15502	0.00045	0.00330662	yes
ENSG00000008513.14	ST3GAL1	17.3556	18.1034	16.2381	22.1023	17.4052	17.825	ENSG00000008513.14	ST3GAL1	chr8:133454847-133571940	MB468_CTRL	MB468_W2	OK	17.2324	19.1109	0.14927	0.370651	0.46335	0.661295	no
ENSG00000008516.16	MMP25	0	0	0	0	0	0.273458	ENSG00000008516.16	MMP25	chr16:3046680-3060726	MB468_CTRL	MB468_W2	NOTEST	0	0.0911526	inf	0	1	1	no
ENSG00000008517.16	IL32	0	0	0.157259	0	0	1.55233	ENSG00000008517.16	IL32	chr16:3065296-3087100	MB468_CTRL	MB468_W2	NOTEST	0.0524197	0.517442	3.30322	0	1	1	no
ENSG00000008710.18	PKD1	12.8571	12.0405	13.0055	17.2484	43.4333	28.7887	ENSG00000008710.18	PKD1	chr16:2039814-2135898	MB468_CTRL	MB468_W2	OK	12.6344	29.8235	1.23909	1.60934	5e-05	0.000470501	yes
ENSG00000008735.13	MAPK8IP2	0.591422	0.818432	0.702553	0.361754	1.18644	1.45456	ENSG00000008735.13	MAPK8IP2	chr22:50568860-50613981	MB468_CTRL	MB468_W2	NOTEST	0.704136	1.00092	0.507397	0	1	1	no
ENSG00000008838.18	MED24	20.4144	28.1365	20.5086	39.072	27.8434	30.4818	ENSG00000008838.18	MED24	chr17:40019096-40100725	MB468_CTRL	MB468_W2	OK	23.0199	32.4657	0.496039	0.86954	0.04845	0.143348	no
ENSG00000008853.16	RHOBTB2	3.26646	2.96471	2.11881	3.18506	1.96428	6.65746	ENSG00000008853.16	RHOBTB2	chr8:22687658-23083619	MB468_CTRL	MB468_W2	OK	2.78333	3.9356	0.499771	0.445236	0.27365	0.477542	no
ENSG00000008869.11	HEATR5B	8.58025	13.1114	9.5378	15.879	15.911	9.94722	ENSG00000008869.11	HEATR5B	chr2:36968382-37084342	MB468_CTRL	MB468_W2	OK	10.4098	13.9124	0.418425	0.736594	0.16605	0.34404	no
ENSG00000008952.16	SEC62	19.8085	21.5747	22.9615	16.2374	20.0132	20.555	ENSG00000008952.16	SEC62	chr3:169939352-169998373	MB468_CTRL	MB468_W2	OK	21.4482	18.9352	-0.179787	-0.466292	0.3381	0.546651	no
ENSG00000008988.9	RPS20	599	595.723	742.097	1018.45	1531.26	1214.37	ENSG00000008988.9	RPS20	chr8:56067294-56074581	MB468_CTRL	MB468_W2	OK	645.607	1254.69	0.958607	4.35805	5e-05	0.000470501	yes
ENSG00000009307.15	CSDE1	514.977	543.257	572.344	300.654	317.303	340.171	ENSG00000009307.15	CSDE1	chr1:114716912-114758676	MB468_CTRL	MB468_W2	OK	543.526	319.376	-0.767094	-2.42453	5e-05	0.000470501	yes
ENSG00000009335.17	UBE3C	27.5173	26.3005	27.9886	20.5572	21.4986	17.7789	ENSG00000009335.17	UBE3C	chr7:157138912-157269372	MB468_CTRL	MB468_W2	OK	27.2688	19.9449	-0.451233	-1.46941	0.00935	0.0397606	yes
ENSG00000009413.15	REV3L	11.9124	12.7344	10.852	6.98118	10.0181	9.96215	ENSG00000009413.15	REV3L	chr6:111299027-111606278	MB468_CTRL	MB468_W2	OK	11.8329	8.98713	-0.396876	-0.495242	0.1872	0.372854	no
ENSG00000009694.13	TENM1	0.113633	0.104316	0.203781	0.0769957	0.0925634	0.22424	ENSG00000009694.13	TENM1	chrX:123959232-124963817	MB468_CTRL	MB468_W2	NOTEST	0.140577	0.131266	-0.0988594	0	1	1	no
ENSG00000009709.11	PAX7	5.05485	6.59879	6.08623	2.83176	3.97588	4.21998	ENSG00000009709.11	PAX7	chr1:18631005-18748866	MB468_CTRL	MB468_W2	OK	5.91329	3.67587	-0.685874	-1.95022	0.0016	0.00949687	yes
ENSG00000009724.16	MASP2	0	0	0	0	0	0	ENSG00000009724.16	MASP2	chr1:11012343-11047233	MB468_CTRL	MB468_W2	NOTEST	0	0	0	0	1	1	no
ENSG00000009765.14	IYD	0	0	0.0448618	0	0	0	ENSG00000009765.14	IYD	chr6:150368891-150405969	MB468_CTRL	MB468_W2	NOTEST	0.0149539	0	#NAME?	0	1	1	no
ENSG00000009780.15	FAM76A	3.10936	3.01034	3.68479	1.92252	2.29342	2.77402	ENSG00000009780.15	FAM76A	chr1:27725978-27763122	MB468_CTRL	MB468_W2	OK	3.26816	2.32999	-0.488157	-0.992487	0.0381	0.119928	no
ENSG00000009790.14	TRAF3IP3	0	0	0	0	0	0	ENSG00000009790.14	TRAF3IP3	chr1:209756031-209784559	MB468_CTRL	MB468_W2	NOTEST	0	0	0	0	1	1	no
ENSG00000009830.11	POMT2	8.35929	8.78948	6.39426	22.7886	19.4623	14.4098	ENSG00000009830.11	POMT2	chr14:77274955-77331597	MB468_CTRL	MB468_W2	OK	7.84768	18.8869	1.26705	1.47143	0.0001	0.000882755	yes
ENSG00000009844.15	VTA1	39.7468	43.4415	43.5846	26.3848	21.0454	20.4124	ENSG00000009844.15	VTA1	chr6:142147161-142224689	MB468_CTRL	MB468_W2	OK	42.2576	22.6142	-0.901982	-4.55577	5e-05	0.000470501	yes
ENSG00000009950.15	MLXIPL	0.0847146	0.3651	0.942438	1.063	0.94947	1.40088	ENSG00000009950.15	MLXIPL	chr7:73593193-73624543	MB468_CTRL	MB468_W2	NOTEST	0.464084	1.13778	1.29377	0	1	1	no
ENSG00000009954.10	BAZ1B	24.8008	26.742	29.6809	14.7296	16.3354	20.3795	ENSG00000009954.10	BAZ1B	chr7:73440397-73522278	MB468_CTRL	MB468_W2	OK	27.0746	17.1482	-0.658885	-3.61512	5e-05	0.000470501	yes
ENSG00000010017.12	RANBP9	49.4686	54.452	50.5683	34.7099	31.2727	33.5156	ENSG00000010017.12	RANBP9	chr6:13615326-13711564	MB468_CTRL	MB468_W2	OK	51.4963	33.1661	-0.634761	-2.69242	5e-05	0.000470501	yes
ENSG00000010030.13	ETV7	1.45663	1.68781	1.83785	2.2934	2.19646	1.11798	ENSG00000010030.13	ETV7	chr6:36354090-36491143	MB468_CTRL	MB468_W2	NOTEST	1.66076	1.86928	0.170633	0	1	1	no
ENSG00000010072.15	SPRTN	13.2449	13.9458	18.7246	13.0408	10.7329	16.9006	ENSG00000010072.15	SPRTN	chr1:231332752-231355023	MB468_CTRL	MB468_W2	OK	15.3051	13.5581	-0.17486	-0.41023	0.46625	0.663547	no
ENSG00000010165.19	METTL13	14.5705	16.5882	16.6349	10.4733	14.3592	13.4115	ENSG00000010165.19	METTL13	chr1:171781663-171814023	MB468_CTRL	MB468_W2	OK	15.9312	12.748	-0.321584	-0.90526	0.08425	0.214783	no
ENSG00000010219.13	DYRK4	4.15921	3.67979	3.67714	3.60267	2.20355	5.53015	ENSG00000010219.13	DYRK4	chr12:4562203-4851927	MB468_CTRL	MB468_W2	OK	3.83871	3.77879	-0.0226991	-0.0164277	0.9614	0.981183	no
ENSG00000010244.17	ZNF207	45.6512	39.6793	40.1678	57.7268	36.8813	50.0692	ENSG00000010244.17	ZNF207	chr17:32266175-32381886	MB468_CTRL	MB468_W2	OK	41.8328	48.2257	0.20517	0.563022	0.2866	0.492635	no
ENSG00000010256.10	UQCRC1	85.8472	83.3528	79.335	40.6352	61.14	55.4485	ENSG00000010256.10	UQCRC1	chr3:48599001-48610976	MB468_CTRL	MB468_W2	OK	82.845	52.4079	-0.66063	-2.40163	5e-05	0.000470501	yes
ENSG00000010270.13	STARD3NL	7.70047	7.5016	7.76925	7.93448	6.7321	6.63508	ENSG00000010270.13	STARD3NL	chr7:38178221-38230671	MB468_CTRL	MB468_W2	OK	7.65711	7.10055	-0.108868	-0.248421	0.63575	0.792811	no
ENSG00000010278.12	CD9	70.0042	73.6643	76.3642	59.1101	73.7259	53.6309	ENSG00000010278.12	CD9	chr12:6199714-6238271	MB468_CTRL	MB468_W2	OK	73.3442	62.1556	-0.238798	-1.30852	0.0187	0.0689946	no
ENSG00000010282.14	HHATL	0	0	0	0	0	0	ENSG00000010282.14	HHATL	chr3:42692662-43060211	MB468_CTRL	MB468_W2	NOTEST	0	0	0	0	1	1	no
ENSG00000010292.12	NCAPD2	33.5639	31.5912	23.8404	18.8013	35.3633	26.2471	ENSG00000010292.12	NCAPD2	chr12:6491885-6531955	MB468_CTRL	MB468_W2	OK	29.6652	26.8039	-0.146325	-0.220081	0.64815	0.801701	no
ENSG00000010295.19	IFFO1	0	0.0854565	0	0.209783	0.73103	0.348937	ENSG00000010295.19	IFFO1	chr12:6538374-6556083	MB468_CTRL	MB468_W2	NOTEST	0.0284855	0.429916	3.91576	0	1	1	no
ENSG00000010310.8	GIPR	0.196951	0.732729	0.16042	0.893054	4.29669	0.698635	ENSG00000010310.8	GIPR	chr19:45668243-45683724	MB468_CTRL	MB468_W2	NOTEST	0.363367	1.96279	2.43341	0	1	1	no
ENSG00000010318.20	PHF7	1.64591	2.90742	3.67354	2.52879	3.08971	4.95891	ENSG00000010318.20	PHF7	chr3:52410656-52423641	MB468_CTRL	MB468_W2	OK	2.74229	3.5258	0.362571	0.407774	0.3097	0.51723	no
ENSG00000010319.6	SEMA3G	0.135581	0.0829159	0.345439	0	0.290735	0.988176	ENSG00000010319.6	SEMA3G	chr3:52433052-52445085	MB468_CTRL	MB468_W2	NOTEST	0.187979	0.426304	1.18131	0	1	1	no
ENSG00000010322.15	NISCH	8.90919	9.20272	9.86206	20.2234	31.7907	25.6481	ENSG00000010322.15	NISCH	chr3:52455117-52493071	MB468_CTRL	MB468_W2	OK	9.32466	25.8874	1.47313	3.53128	5e-05	0.000470501	yes
ENSG00000010327.10	STAB1	0	0	0	0	0	0	ENSG00000010327.10	STAB1	chr3:52495337-52770949	MB468_CTRL	MB468_W2	NOTEST	0	0	0	0	1	1	no
ENSG00000010361.13	FUZ	0.474273	0	0	0	0	0	ENSG00000010361.13	FUZ	chr19:49766967-49817376	MB468_CTRL	MB468_W2	NOTEST	0.158091	0	#NAME?	0	1	1	no
ENSG00000010379.15	SLC6A13	0	0	0	0	0	0	ENSG00000010379.15	SLC6A13	chr12:220620-262873	MB468_CTRL	MB468_W2	NOTEST	0	0	0	0	1	1	no
ENSG00000010404.17	IDS	36.0906	47.8541	42.1025	29.0303	35.5042	30.5126	ENSG00000010404.17	IDS	chrX:149476989-149550510	MB468_CTRL	MB468_W2	OK	42.0157	31.6824	-0.407249	-1.4686	0.0087	0.037563	yes
ENSG00000010438.16	PRSS3	0	0	0	1.81065	0	0	ENSG00000010438.16	PRSS3	chr9:33750465-33920404	MB468_CTRL	MB468_W2	NOTEST	0	0.603549	inf	0	1	1	no
ENSG00000010539.11	ZNF200	5.11568	8.24586	6.72401	9.53704	9.69049	11.6812	ENSG00000010539.11	ZNF200	chr16:3188211-3236221	MB468_CTRL	MB468_W2	OK	6.69519	10.3029	0.621855	1.33938	0.01435	0.056234	no
ENSG00000010610.9	CD4	0	0	0	0.162406	0	0	ENSG00000010610.9	CD4	chr12:6786857-6820808	MB468_CTRL	MB468_W2	NOTEST	0	0.0541353	inf	0	1	1	no
ENSG00000010626.14	LRRC23	1.53903	1.4182	1.48056	1.09088	0.413611	3.36596	ENSG00000010626.14	LRRC23	chr12:6867118-6923698	MB468_CTRL	MB468_W2	NOTEST	1.47926	1.62349	0.134216	0	1	1	no
ENSG00000010671.15	BTK	0	0.257159	0	0.160682	0	0	ENSG00000010671.15	BTK	chrX:101349446-101390796	MB468_CTRL	MB468_W2	NOTEST	0.0857196	0.0535606	-0.678452	0	1	1	no
ENSG00000010704.18	HFE	8.78927	5.70051	4.43335	17.2513	15.5171	13.2577	ENSG00000010704.18	HFE	chr6:26087280-26098343	MB468_CTRL	MB468_W2	OK	6.30771	15.342	1.2823	1.76934	0.00195	0.0111744	yes
ENSG00000010803.16	SCMH1	26.4255	32.5392	31.6802	37.7674	30.4948	58.5418	ENSG00000010803.16	SCMH1	chr1:41014589-41242154	MB468_CTRL	MB468_W2	OK	30.215	42.268	0.484302	0.849851	0.12915	0.289535	no
ENSG00000010810.17	FYN	12.5968	5.74001	11.7982	2.55125	5.05736	8.29561	ENSG00000010810.17	FYN	chr6:111660331-111873452	MB468_CTRL	MB468_W2	OK	10.045	5.30141	-0.92203	-0.98144	0.00315	0.016581	yes
ENSG00000010818.8	HIVEP2	38.8331	13.1663	22.1952	45.001	51.8997	85.2244	ENSG00000010818.8	HIVEP2	chr6:142748442-142945201	MB468_CTRL	MB468_W2	OK	24.7315	60.7084	1.29554	0.926083	0.1221	0.278569	no
ENSG00000010932.15	FMO1	0	0	0	0	0	0	ENSG00000010932.15	FMO1	chr1:171247579-171285978	MB468_CTRL	MB468_W2	NOTEST	0	0	0	0	1	1	no
ENSG00000011007.12	TCEB3	32.9109	35.8744	36.1293	26.753	24.3495	31.0057	ENSG00000011007.12	TCEB3	chr1:23743154-23778287	MB468_CTRL	MB468_W2	OK	34.9715	27.3694	-0.353619	-1.26183	0.02995	0.099957	no
ENSG00000011009.10	LYPLA2	25.8089	36.1945	32.2053	37.157	36.2963	44.1756	ENSG00000011009.10	LYPLA2	chr1:23790969-23795539	MB468_CTRL	MB468_W2	OK	31.4029	39.2097	0.320311	0.93484	0.0941	0.23255	no
ENSG00000011021.21	CLCN6	1.65045	1.03206	1.44337	2.93002	4.11887	2.04578	ENSG00000011021.21	CLCN6	chr1:11761786-11848345	MB468_CTRL	MB468_W2	OK	1.37529	3.03156	1.14032	1.20888	0.0031	0.0163649	yes
ENSG00000011028.13	MRC2	1.28914	0.997427	1.07941	0.791982	0.955859	0.399193	ENSG00000011028.13	MRC2	chr17:62626030-62693597	MB468_CTRL	MB468_W2	NOTEST	1.12199	0.715678	-0.648683	0	1	1	no
ENSG00000011052.21	NME1-NME2	1.43037	2.00479	0.86442	1.33917	0	0	ENSG00000011052.21	NME1-NME2	chr17:51153535-51171747	MB468_CTRL	MB468_W2	NOTEST	1.43319	0.44639	-1.68286	0	1	1	no
ENSG00000011083.8	SLC6A7	0.049541	0	0	0	0	0.157904	ENSG00000011083.8	SLC6A7	chr5:150189956-150290291	MB468_CTRL	MB468_W2	NOTEST	0.0165137	0.0526346	1.67235	0	1	1	no
ENSG00000011105.11	TSPAN9	17.4103	17.3301	17.2968	11.081	15.5954	21.8135	ENSG00000011105.11	TSPAN9	chr12:3077354-3286564	MB468_CTRL	MB468_W2	OK	17.3457	16.1633	-0.101858	-0.318064	0.54585	0.726637	no
ENSG00000011114.14	BTBD7	10.6301	10.6679	9.90224	9.92328	8.12711	9.69505	ENSG00000011114.14	BTBD7	chr14:93237549-93333092	MB468_CTRL	MB468_W2	OK	10.4001	9.24848	-0.169307	-0.457265	0.3008	0.50778	no
ENSG00000011132.11	APBA3	5.54804	13.1824	7.07203	7.53172	10.7056	9.01671	ENSG00000011132.11	APBA3	chr19:3750818-3761699	MB468_CTRL	MB468_W2	OK	8.60083	9.08469	0.0789609	0.108673	0.81755	0.907503	no
ENSG00000011143.16	MKS1	3.58611	3.96687	3.03203	3.22224	6.07188	6.83221	ENSG00000011143.16	MKS1	chr17:58205436-58268518	MB468_CTRL	MB468_W2	OK	3.52833	5.37545	0.607397	0.68529	0.11115	0.261363	no
ENSG00000011198.7	ABHD5	13.5514	11.5036	13.0558	11.8627	7.1786	17.6713	ENSG00000011198.7	ABHD5	chr3:43286511-43734371	MB468_CTRL	MB468_W2	OK	12.7036	12.2375	-0.0539264	-0.101892	0.85805	0.930506	no
ENSG00000011201.11	ANOS1	2.29549	3.06106	2.44059	1.39362	2.79707	0.475752	ENSG00000011201.11	ANOS1	chrX:8528873-8732186	MB468_CTRL	MB468_W2	OK	2.59905	1.55548	-0.740622	-0.745031	0.12605	0.28471	no
ENSG00000011243.17	AKAP8L	18.5541	23.0118	31.2849	62.247	64.8289	60.5399	ENSG00000011243.17	AKAP8L	chr19:15353384-15419141	MB468_CTRL	MB468_W2	OK	24.2836	62.5386	1.36476	2.62611	5e-05	0.000470501	yes
ENSG00000011258.15	MBTD1	6.05796	4.60215	3.50514	9.97368	3.9893	4.19962	ENSG00000011258.15	MBTD1	chr17:51177424-51260163	MB468_CTRL	MB468_W2	OK	4.72175	6.0542	0.358614	0.750487	0.14325	0.310803	no
ENSG00000011260.13	UTP18	15.3229	15.1699	19.6877	10.3208	14.0976	14.0074	ENSG00000011260.13	UTP18	chr17:51260527-51297936	MB468_CTRL	MB468_W2	OK	16.7269	12.8086	-0.385052	-1.04082	0.04545	0.136734	no
ENSG00000011275.18	RNF216	20.5229	19.8955	20.1283	18.0549	26.9636	19.1381	ENSG00000011275.18	RNF216	chr7:5620046-5781739	MB468_CTRL	MB468_W2	OK	20.1822	21.3855	0.0835489	0.231635	0.63835	0.794998	no
ENSG00000011295.15	TTC19	24.8557	23.6309	22.9344	21.6152	22.8883	29.0827	ENSG00000011295.15	TTC19	chr17:15976559-16353656	MB468_CTRL	MB468_W2	OK	23.807	24.5287	0.0430865	0.094573	0.8637	0.933621	no
ENSG00000011304.18	PTBP1	181.444	204.068	195.656	106.331	120.63	123.856	ENSG00000011304.18	PTBP1	chr19:797074-812327	MB468_CTRL	MB468_W2	OK	193.723	116.939	-0.72824	-3.47497	5e-05	0.000470501	yes
ENSG00000011332.19	DPF1	3.47204	2.2107	3.38791	2.13101	10.2898	1.23975	ENSG00000011332.19	DPF1	chr19:38211005-38229714	MB468_CTRL	MB468_W2	OK	3.02355	4.55352	0.590741	0.433068	0.2871	0.493102	no
ENSG00000011347.9	SYT7	12.0454	14.2533	12.775	17.1326	21.1466	27.0986	ENSG00000011347.9	SYT7	chr11:61515312-61581148	MB468_CTRL	MB468_W2	OK	13.0246	21.7926	0.742602	3.00095	5e-05	0.000470501	yes
ENSG00000011376.9	LARS2	4.18408	5.82435	4.20975	4.81074	4.94329	4.79027	ENSG00000011376.9	LARS2	chr3:45388505-45549421	MB468_CTRL	MB468_W2	OK	4.73939	4.8481	0.0327179	0.048178	0.9132	0.957744	no
ENSG00000011405.13	PIK3C2A	32.7676	22.3759	32.3763	11.976	10.7576	13.1159	ENSG00000011405.13	PIK3C2A	chr11:17074388-17207983	MB468_CTRL	MB468_W2	OK	29.1733	11.9499	-1.28766	-2.11163	0.00025	0.0019885	yes
ENSG00000011422.11	PLAUR	29.0254	36.8036	36.6555	31.153	44.8863	40.6332	ENSG00000011422.11	PLAUR	chr19:43646094-43670547	MB468_CTRL	MB468_W2	OK	34.1615	38.8909	0.187059	0.837771	0.12845	0.288566	no
ENSG00000011426.10	ANLN	85.3768	101.349	89.9637	71.3933	86.223	68.1836	ENSG00000011426.10	ANLN	chr7:36324220-36453791	MB468_CTRL	MB468_W2	OK	92.2299	75.2666	-0.293224	-0.883761	0.1069	0.254207	no
ENSG00000011451.17	WIZ	34.3151	41.8026	37.2737	30.1783	39.9852	32.8538	ENSG00000011451.17	WIZ	chr19:15419979-15449951	MB468_CTRL	MB468_W2	OK	37.7972	34.3391	-0.138425	-0.79261	0.1639	0.34105	no
ENSG00000011454.16	RABGAP1	10.4801	8.46173	8.32417	18.241	10.2992	17.2618	ENSG00000011454.16	RABGAP1	chr9:122940832-123104866	MB468_CTRL	MB468_W2	OK	9.08867	15.2673	0.748304	1.27219	0.0089	0.0382553	yes
ENSG00000011465.16	DCN	0	0	0	0	0	0	ENSG00000011465.16	DCN	chr12:91140483-91183123	MB468_CTRL	MB468_W2	NOTEST	0	0	0	0	1	1	no
ENSG00000011478.11	QPCTL	9.4153	5.84211	6.05436	7.20875	8.32776	7.45641	ENSG00000011478.11	QPCTL	chr19:45687453-45703989	MB468_CTRL	MB468_W2	OK	7.10392	7.6643	0.109539	0.166088	0.74225	0.863649	no
ENSG00000011485.14	PPP5C	39.9321	35.2386	35.5625	39.7111	48.0918	41.4941	ENSG00000011485.14	PPP5C	chr19:46346993-46392981	MB468_CTRL	MB468_W2	OK	36.9111	43.099	0.223602	0.832926	0.1241	0.281711	no
ENSG00000011523.13	CEP68	2.79993	3.03618	2.98733	4.17364	5.94166	6.06959	ENSG00000011523.13	CEP68	chr2:65056365-65130106	MB468_CTRL	MB468_W2	OK	2.94115	5.39496	0.875234	1.32927	0.0089	0.0382553	yes
ENSG00000011566.14	MAP4K3	38.9303	53.4428	28.7277	28.0549	53.0382	43.0574	ENSG00000011566.14	MAP4K3	chr2:39249265-39717963	MB468_CTRL	MB468_W2	OK	40.3669	41.3835	0.0358825	0.0573725	0.9124	0.957405	no
ENSG00000011590.13	ZBTB32	0	0.0852013	0	0	0	0	ENSG00000011590.13	ZBTB32	chr19:35704526-35717038	MB468_CTRL	MB468_W2	NOTEST	0.0284004	0	#NAME?	0	1	1	no
ENSG00000011638.10	TMEM159	12.1404	14.7532	14.7048	13.1661	12.2433	20.0183	ENSG00000011638.10	TMEM159	chr16:20933110-21180616	MB468_CTRL	MB468_W2	OK	13.8661	15.1426	0.127044	0.311438	0.52415	0.709684	no
ENSG00000011677.12	GABRA3	8.48226	9.0843	7.27657	7.46245	8.49833	10.7294	ENSG00000011677.12	GABRA3	chrX:152138882-152451358	MB468_CTRL	MB468_W2	OK	8.28104	8.89671	0.10346	0.156827	0.7235	0.851373	no
ENSG00000012048.20	BRCA1	16.978	19.7571	18.7749	12.3159	11.7882	13.1652	ENSG00000012048.20	BRCA1	chr17:43044294-43211689	MB468_CTRL	MB468_W2	OK	18.5033	12.4231	-0.574758	-1.15661	0.0161	0.0615326	no
ENSG00000012061.15	ERCC1	25.8813	30.2033	23.4736	32.4767	35.7043	38.7115	ENSG00000012061.15	ERCC1	chr19:45379633-45478828	MB468_CTRL	MB468_W2	OK	26.5194	35.6309	0.426078	0.939429	0.0821	0.210871	no
ENSG00000012124.15	CD22	1.48593	1.61849	3.73247	2.99723	1.76061	7.4788	ENSG00000012124.15	CD22	chr19:35319260-35347355	MB468_CTRL	MB468_W2	OK	2.27896	4.07888	0.839797	0.334451	0.02455	0.0855329	no
ENSG00000012171.18	SEMA3B	0.775521	1.26617	0.897493	1.20564	3.09466	1.24586	ENSG00000012171.18	SEMA3B	chr3:50267557-50277546	MB468_CTRL	MB468_W2	NOTEST	0.979728	1.84872	0.916073	0	1	1	no
ENSG00000012174.11	MBTPS2	11.7782	11.7972	11.3826	8.78541	6.80399	8.01308	ENSG00000012174.11	MBTPS2	chrX:21839635-21885424	MB468_CTRL	MB468_W2	OK	11.6527	7.86749	-0.566684	-2.21432	0.0001	0.000882755	yes
ENSG00000012211.12	PRICKLE3	10.94	8.10854	5.66873	17.3207	16.75	20.1026	ENSG00000012211.12	PRICKLE3	chrX:49175263-49186528	MB468_CTRL	MB468_W2	OK	8.23908	18.0578	1.13207	2.4272	5e-05	0.000470501	yes
ENSG00000012223.12	LTF	0	0	0	0	0	0	ENSG00000012223.12	LTF	chr3:46435644-46485234	MB468_CTRL	MB468_W2	NOTEST	0	0	0	0	1	1	no
ENSG00000012232.8	EXTL3	11.216	12.3998	13.6859	9.13216	10.6687	13.0859	ENSG00000012232.8	EXTL3	chr8:28600468-28755599	MB468_CTRL	MB468_W2	OK	12.4339	10.9623	-0.181735	-0.44352	0.28015	0.485006	no
ENSG00000012504.13	NR1H4	0	0	0	0	0	0	ENSG00000012504.13	NR1H4	chr12:100473707-100564413	MB468_CTRL	MB468_W2	NOTEST	0	0	0	0	1	1	no
ENSG00000012660.13	ELOVL5	122.119	127.669	127.668	87.0401	79.4955	90.776	ENSG00000012660.13	ELOVL5	chr6:53267397-53349179	MB468_CTRL	MB468_W2	OK	125.818	85.7705	-0.55279	-3.19089	5e-05	0.000470501	yes
ENSG00000012779.10	ALOX5	4.16003	2.46019	3.71208	1.70771	5.89305	2.33021	ENSG00000012779.10	ALOX5	chr10:45374175-45453121	MB468_CTRL	MB468_W2	OK	3.4441	3.31032	-0.057156	-0.0476174	0.9064	0.9548	no
ENSG00000012817.15	KDM5D	0	0	0	0	0	0	ENSG00000012817.15	KDM5D	chrY:19703864-19744939	MB468_CTRL	MB468_W2	NOTEST	0	0	0	0	1	1	no
ENSG00000012822.15	CALCOCO1	6.70469	9.68222	9.81033	12.2436	10.2478	14.8758	ENSG00000012822.15	CALCOCO1	chr12:53708516-53727745	MB468_CTRL	MB468_W2	OK	8.73241	12.4558	0.512361	0.780662	0.06	0.167987	no
ENSG00000012963.14	UBR7	13.7418	13.6399	12.1666	7.11436	9.11079	8.20863	ENSG00000012963.14	UBR7	chr14:93184950-93229215	MB468_CTRL	MB468_W2	OK	13.1828	8.14459	-0.694743	-1.8674	0.0008	0.00535066	yes
ENSG00000012983.11	MAP4K5	15.0138	20.5323	10.4897	14.9825	16.7269	24.9494	ENSG00000012983.11	MAP4K5	chr14:50418500-50668331	MB468_CTRL	MB468_W2	OK	15.3453	18.8863	0.299545	0.399446	0.4069	0.610992	no
ENSG00000013016.15	EHD3	0.624795	0.867791	0.666392	1.059	0.293471	0.40684	ENSG00000013016.15	EHD3	chr2:31234336-31269447	MB468_CTRL	MB468_W2	NOTEST	0.719659	0.586438	-0.295337	0	1	1	no
ENSG00000013275.7	PSMC4	68.1106	64.1618	62.9372	37.7193	33.8963	60.8777	ENSG00000013275.7	PSMC4	chr19:39971004-39981441	MB468_CTRL	MB468_W2	OK	65.0699	44.1644	-0.559105	-3.0599	5e-05	0.000470501	yes
ENSG00000013288.8	MAN2B2	3.97923	3.86959	3.46965	3.82892	5.49723	3.39611	ENSG00000013288.8	MAN2B2	chr4:6575174-6623362	MB468_CTRL	MB468_W2	OK	3.77282	4.24075	0.168676	0.190517	0.64445	0.798714	no
ENSG00000013293.5	SLC7A14	0	0	0	0	0	0	ENSG00000013293.5	SLC7A14	chr3:170418864-170860380	MB468_CTRL	MB468_W2	NOTEST	0	0	0	0	1	1	no
ENSG00000013297.10	CLDN11	0.555054	0.33752	0.716302	0.980106	1.13212	0.955697	ENSG00000013297.10	CLDN11	chr3:170418864-170860380	MB468_CTRL	MB468_W2	NOTEST	0.536292	1.02264	0.931207	0	1	1	no
ENSG00000013306.15	SLC25A39	66.9538	71.103	70.4054	54.2539	94.9965	81.7035	ENSG00000013306.15	SLC25A39	chr17:44319624-44324870	MB468_CTRL	MB468_W2	OK	69.4874	76.9846	0.147819	0.753394	0.1775	0.360069	no
ENSG00000013364.18	MVP	22.1961	18.4496	17.2748	14.866	15.3475	14.8384	ENSG00000013364.18	MVP	chr16:29806105-29848039	MB468_CTRL	MB468_W2	OK	19.3068	15.0173	-0.362485	-0.507538	0.22125	0.415753	no
ENSG00000013374.15	NUB1	16.447	17.5081	20.4392	14.9856	8.72986	18.517	ENSG00000013374.15	NUB1	chr7:151341698-151413354	MB468_CTRL	MB468_W2	OK	18.1314	14.0775	-0.365106	-0.975614	0.0845	0.215031	no
ENSG00000013375.15	PGM3	19.8187	22.189	27.1426	18.8719	9.9667	18.6881	ENSG00000013375.15	PGM3	chr6:83067665-83198932	MB468_CTRL	MB468_W2	OK	23.0501	15.8422	-0.540995	-0.832892	0.06215	0.172557	no
ENSG00000013392.7	RWDD2A	1.26615	1.08939	1.3664	2.82074	2.57126	2.37106	ENSG00000013392.7	RWDD2A	chr6:83067665-83198932	MB468_CTRL	MB468_W2	OK	1.24065	2.58769	1.06057	1.48686	0.0142	0.0557714	no
ENSG00000013441.15	CLK1	17.7964	13.5055	17.3084	47.2666	60.611	59.8862	ENSG00000013441.15	CLK1	chr2:200853008-200864744	MB468_CTRL	MB468_W2	OK	16.2034	55.9213	1.7871	4.73135	5e-05	0.000470501	yes
ENSG00000013503.9	POLR3B	2.73667	3.81554	3.14554	1.69021	1.75448	3.42314	ENSG00000013503.9	POLR3B	chr12:106357657-106889316	MB468_CTRL	MB468_W2	OK	3.23258	2.28928	-0.497796	-0.824149	0.08155	0.209767	no
ENSG00000013523.9	ANGEL1	3.35923	2.73096	4.82249	5.49702	7.69862	8.09254	ENSG00000013523.9	ANGEL1	chr14:76762188-76826246	MB468_CTRL	MB468_W2	OK	3.63756	7.09606	0.964046	1.59305	0.00185	0.0107119	yes
ENSG00000013561.17	RNF14	29.0471	27.5025	29.936	19.6853	25.4469	25.0995	ENSG00000013561.17	RNF14	chr5:141943584-141990291	MB468_CTRL	MB468_W2	OK	28.8285	23.4106	-0.300336	-1.05078	0.04755	0.141496	no
ENSG00000013563.13	DNASE1L1	16.3582	17.9166	14.241	15.2713	24.5443	22.2873	ENSG00000013563.13	DNASE1L1	chrX:154389954-154421726	MB468_CTRL	MB468_W2	OK	16.172	20.701	0.356203	0.486105	0.34165	0.550038	no
ENSG00000013573.16	DDX11	14.516	12.0192	8.35122	23.0671	35.5378	25.7294	ENSG00000013573.16	DDX11	chr12:31020762-31104791	MB468_CTRL	MB468_W2	OK	11.6288	28.1114	1.27345	2.59356	5e-05	0.000470501	yes
ENSG00000013583.8	HEBP1	18.747	20.2677	22.0024	8.82982	8.71083	16.6388	ENSG00000013583.8	HEBP1	chr12:12927725-13000273	MB468_CTRL	MB468_W2	OK	20.339	11.3932	-0.836084	-2.70482	5e-05	0.000470501	yes
ENSG00000013588.6	GPRC5A	44.7284	49.2589	50.816	30.4432	30.2109	27.4523	ENSG00000013588.6	GPRC5A	chr12:12890781-12917937	MB468_CTRL	MB468_W2	OK	48.2677	29.3688	-0.716774	-2.28827	5e-05	0.000470501	yes
ENSG00000013619.13	MAMLD1	3.32767	5.23953	4.50801	2.83866	5.0723	4.46842	ENSG00000013619.13	MAMLD1	chrX:150361421-150514178	MB468_CTRL	MB468_W2	OK	4.3584	4.12646	-0.0788929	-0.190591	0.70165	0.837148	no
ENSG00000013725.14	CD6	0.564474	0.343775	0.924268	0	0.540504	0.458651	ENSG00000013725.14	CD6	chr11:60971679-61020377	MB468_CTRL	MB468_W2	NOTEST	0.610839	0.333052	-0.875047	0	1	1	no
ENSG00000013810.18	TACC3	36.1804	40.1503	39.8411	37.4281	55.1666	50.4635	ENSG00000013810.18	TACC3	chr4:1721489-1745176	MB468_CTRL	MB468_W2	OK	38.7239	47.6861	0.300343	1.44677	0.01005	0.0422326	yes
ENSG00000014123.9	UFL1	11.5474	9.04365	10.5521	8.36127	7.42328	7.3344	ENSG00000014123.9	UFL1	chr6:96358373-96555276	MB468_CTRL	MB468_W2	OK	10.3811	7.70632	-0.429843	-1.41166	0.0124	0.0499599	yes
ENSG00000014138.8	POLA2	18.2492	16.5134	23.9238	19.6913	27.5039	25.02	ENSG00000014138.8	POLA2	chr11:65261761-65305589	MB468_CTRL	MB468_W2	OK	19.5621	24.0717	0.299275	0.860527	0.12215	0.278631	no
ENSG00000014164.6	ZC3H3	6.8697	9.32849	6.9372	6.7231	10.6904	10.2322	ENSG00000014164.6	ZC3H3	chr8:143437654-143541453	MB468_CTRL	MB468_W2	OK	7.7118	9.21521	0.25695	0.858471	0.12405	0.281633	no
ENSG00000014216.15	CAPN1	130.096	131.114	117.151	94.2953	111.853	102.247	ENSG00000014216.15	CAPN1	chr11:65177605-65212006	MB468_CTRL	MB468_W2	OK	126.12	102.798	-0.294984	-1.07069	0.0563	0.160484	no
ENSG00000014257.15	ACPP	2.66688	3.05992	2.53799	0.680407	5.36526	1.06216	ENSG00000014257.15	ACPP	chr3:132317366-132368298	MB468_CTRL	MB468_W2	OK	2.75493	2.36927	-0.217572	-0.158061	0.6609	0.810009	no
ENSG00000014641.17	MDH1	53.4377	56.3944	69.4884	59.6841	66.0472	57.6061	ENSG00000014641.17	MDH1	chr2:63121382-63827843	MB468_CTRL	MB468_W2	OK	59.7735	61.1125	0.0319606	0.127796	0.8149	0.906016	no
ENSG00000014824.13	SLC30A9	25.2792	28.4123	25.9093	25.2335	15.6931	19.3123	ENSG00000014824.13	SLC30A9	chr4:41990471-42090457	MB468_CTRL	MB468_W2	OK	26.5336	20.0796	-0.402087	-0.9951	0.0837	0.213782	no
ENSG00000014914.19	MTMR11	4.24732	3.43788	4.15074	11.9937	6.92767	7.95074	ENSG00000014914.19	MTMR11	chr1:149928650-149936898	MB468_CTRL	MB468_W2	OK	3.94531	8.95738	1.18294	1.49864	0.0012	0.00752479	yes
ENSG00000014919.12	COX15	14.9119	14.6835	14.1378	7.73943	15.3803	15.1175	ENSG00000014919.12	COX15	chr10:99659505-99756134	MB468_CTRL	MB468_W2	OK	14.5777	12.7457	-0.193753	-0.538191	0.3195	0.52723	no
ENSG00000015133.18	CCDC88C	10.8434	6.56797	8.84045	15.1735	14.9706	9.11405	ENSG00000015133.18	CCDC88C	chr14:91271322-91417844	MB468_CTRL	MB468_W2	OK	8.75059	13.086	0.580575	0.790574	0.0981	0.239417	no
ENSG00000015153.14	YAF2	32.9019	17.4292	25.0852	20.5248	71.7686	23.0403	ENSG00000015153.14	YAF2	chr12:42157103-42238349	MB468_CTRL	MB468_W2	OK	25.1387	38.4446	0.612867	0.708306	0.188	0.373838	no
ENSG00000015171.18	ZMYND11	20.4306	24.8019	21.8747	15.1371	16.2337	16.3413	ENSG00000015171.18	ZMYND11	chr10:134464-254637	MB468_CTRL	MB468_W2	OK	22.3691	15.9041	-0.492108	-2.33601	0.0002	0.00163443	yes
ENSG00000015285.10	WAS	0	0.49828	0.381486	0	0	0	ENSG00000015285.10	WAS	chrX:48676595-48691427	MB468_CTRL	MB468_W2	NOTEST	0.293255	0	#NAME?	0	1	1	no
ENSG00000015413.9	DPEP1	0	0	0	0	0	0	ENSG00000015413.9	DPEP1	chr16:89613307-89638456	MB468_CTRL	MB468_W2	NOTEST	0	0	0	0	1	1	no
ENSG00000015475.18	BID	77.163	78.7648	70.6197	41.2529	58.9488	65.9798	ENSG00000015475.18	BID	chr22:17734137-17774770	MB468_CTRL	MB468_W2	OK	75.5158	55.3939	-0.447053	-1.89659	0.0007	0.00479022	yes
ENSG00000015479.17	MATR3	133.633	144.928	136.75	124.444	95.7415	103.396	ENSG00000015479.17	MATR3	chr5:138946719-139331677	MB468_CTRL	MB468_W2	OK	138.437	107.86	-0.360065	-0.937955	0.05985	0.167695	no
ENSG00000015520.14	NPC1L1	0	0	0	0	0.407342	0.159739	ENSG00000015520.14	NPC1L1	chr7:44512534-44541315	MB468_CTRL	MB468_W2	NOTEST	0	0.189027	inf	0	1	1	no
ENSG00000015532.9	XYLT2	5.74646	12.8494	6.52561	9.49101	7.25706	12.7589	ENSG00000015532.9	XYLT2	chr17:50346091-50365232	MB468_CTRL	MB468_W2	OK	8.37383	9.83567	0.232136	0.382569	0.4065	0.610666	no
ENSG00000015568.12	RGPD5	0	0	0	0	0	0.102773	ENSG00000015568.12	RGPD5	chr2:109792757-109857695	MB468_CTRL	MB468_W2	NOTEST	0	0.0342576	inf	0	1	1	no
ENSG00000015592.16	STMN4	0	0	0	0	0	0	ENSG00000015592.16	STMN4	chr8:27235322-27258420	MB468_CTRL	MB468_W2	NOTEST	0	0	0	0	1	1	no
ENSG00000015676.17	NUDCD3	51.3363	63.021	59.867	29.7735	35.9426	38.4575	ENSG00000015676.17	NUDCD3	chr7:44379120-44490880	MB468_CTRL	MB468_W2	OK	58.0748	34.7245	-0.741956	-2.80949	5e-05	0.000470501	yes
ENSG00000016082.14	ISL1	0	0	0.179414	0	0	0	ENSG00000016082.14	ISL1	chr5:51383390-51394738	MB468_CTRL	MB468_W2	NOTEST	0.0598045	0	#NAME?	0	1	1	no
ENSG00000016391.10	CHDH	1.59207	1.61131	2.53134	4.2243	2.70539	7.96051	ENSG00000016391.10	CHDH	chr3:53283427-53846390	MB468_CTRL	MB468_W2	OK	1.91157	4.9634	1.37657	1.37766	0.0044	0.0217197	yes
ENSG00000016402.13	IL20RA	5.4182	4.50466	6.2544	4.60687	5.79584	6.76065	ENSG00000016402.13	IL20RA	chr6:136999970-137045180	MB468_CTRL	MB468_W2	OK	5.39242	5.72112	0.085364	0.146645	0.73665	0.859945	no
ENSG00000016490.15	CLCA1	0	0	0	0	0	0	ENSG00000016490.15	CLCA1	chr1:86468367-86500289	MB468_CTRL	MB468_W2	NOTEST	0	0	0	0	1	1	no
ENSG00000016602.9	CLCA4	0	0.0888627	0	0	0	0.124901	ENSG00000016602.9	CLCA4	chr1:86547077-86693203	MB468_CTRL	MB468_W2	NOTEST	0.0296209	0.0416338	0.491139	0	1	1	no
ENSG00000016864.17	GLT8D1	8.81955	8.08298	10.2338	5.08525	11.5074	7.64365	ENSG00000016864.17	GLT8D1	chr3:52495337-52770949	MB468_CTRL	MB468_W2	OK	9.04545	8.07876	-0.163058	-0.126802	0.77485	0.883271	no
ENSG00000017260.19	ATP2C1	15.9445	25.5754	23.6593	19.6171	31.9226	20.8823	ENSG00000017260.19	ATP2C1	chr3:130850594-131381475	MB468_CTRL	MB468_W2	OK	21.7264	24.1407	0.152018	0.333752	0.5208	0.707107	no
ENSG00000017427.15	IGF1	0	0	0	0	0	0	ENSG00000017427.15	IGF1	chr12:102120184-102480645	MB468_CTRL	MB468_W2	NOTEST	0	0	0	0	1	1	no
ENSG00000017483.14	SLC38A5	0.614642	0.351053	0	0	0	0	ENSG00000017483.14	SLC38A5	chrX:48458536-48470256	MB468_CTRL	MB468_W2	NOTEST	0.321898	0	#NAME?	0	1	1	no
ENSG00000017797.11	RALBP1	52.5202	54.8579	57.7952	28.9865	33.4179	39.4892	ENSG00000017797.11	RALBP1	chr18:9475008-9538116	MB468_CTRL	MB468_W2	OK	55.0578	33.9645	-0.696917	-4.04708	5e-05	0.000470501	yes
ENSG00000018189.12	RUFY3	5.86116	10.1938	7.06457	13.8048	8.82411	14.2091	ENSG00000018189.12	RUFY3	chr4:70703746-70807315	MB468_CTRL	MB468_W2	OK	7.7065	12.2793	0.672084	0.930037	0.0337	0.108999	no
ENSG00000018236.14	CNTN1	0	0	0	0	0	0	ENSG00000018236.14	CNTN1	chr12:40692441-41072418	MB468_CTRL	MB468_W2	NOTEST	0	0	0	0	1	1	no
ENSG00000018280.16	SLC11A1	0	0	0	0.326538	0	0.189043	ENSG00000018280.16	SLC11A1	chr2:218382028-218396894	MB468_CTRL	MB468_W2	NOTEST	0	0.17186	inf	0	1	1	no
ENSG00000018408.14	WWTR1	75.1439	94.1353	80.2479	85.008	71.9867	94.209	ENSG00000018408.14	WWTR1	chr3:149517234-149736714	MB468_CTRL	MB468_W2	OK	83.1757	83.7346	0.00966196	0.0271518	0.9619	0.981448	no
ENSG00000018510.13	AGPS	25.4003	19.435	19.4112	15.3937	8.00911	11.0849	ENSG00000018510.13	AGPS	chr2:177227594-177559299	MB468_CTRL	MB468_W2	OK	21.4155	11.4959	-0.897536	-1.50266	0.006	0.0279537	yes
ENSG00000018610.13	CXorf56	25.1772	29.0083	32.0652	17.0985	17.2814	22.5278	ENSG00000018610.13	CXorf56	chrX:119538148-119565408	MB468_CTRL	MB468_W2	OK	28.7502	18.9693	-0.59991	-2.63054	5e-05	0.000470501	yes
ENSG00000018625.14	ATP1A2	0.0423796	0	0	0	0	0	ENSG00000018625.14	ATP1A2	chr1:160115758-160143591	MB468_CTRL	MB468_W2	NOTEST	0.0141265	0	#NAME?	0	1	1	no
ENSG00000018699.11	TTC27	6.07373	9.29913	6.81637	5.46225	6.82679	3.82161	ENSG00000018699.11	TTC27	chr2:32628031-32821051	MB468_CTRL	MB468_W2	OK	7.39641	5.37021	-0.461846	-0.532322	0.2103	0.402166	no
ENSG00000018869.16	ZNF582	3.886	3.0197	4.4708	3.56682	3.35934	4.39461	ENSG00000018869.16	ZNF582	chr19:56219669-56393545	MB468_CTRL	MB468_W2	OK	3.79217	3.77359	-0.00708411	-0.00919982	0.9835	0.991803	no
ENSG00000019102.11	VSIG2	0	0	0	0	0	0	ENSG00000019102.11	VSIG2	chr11:124747471-124752238	MB468_CTRL	MB468_W2	NOTEST	0	0	0	0	1	1	no
ENSG00000019144.17	PHLDB1	7.83607	9.13	6.39563	11.4575	13.2364	15.1081	ENSG00000019144.17	PHLDB1	chr11:118606439-118679690	MB468_CTRL	MB468_W2	OK	7.78723	13.2673	0.768695	0.84245	0.0145	0.0566703	no
ENSG00000019169.10	MARCO	1.45829	0.908063	0.944669	0	0	0	ENSG00000019169.10	MARCO	chr2:118942165-118994660	MB468_CTRL	MB468_W2	NOTEST	1.10368	0	#NAME?	0	1	1	no
ENSG00000019186.9	CYP24A1	0	0	0	0.561072	0	0	ENSG00000019186.9	CYP24A1	chr20:54153448-54173973	MB468_CTRL	MB468_W2	NOTEST	0	0.187024	inf	0	1	1	no
ENSG00000019485.12	PRDM11	1.43104	1.10389	2.42113	0.700823	0.34606	0.935443	ENSG00000019485.12	PRDM11	chr11:45095805-45235292	MB468_CTRL	MB468_W2	NOTEST	1.65202	0.660775	-1.322	0	1	1	no
ENSG00000019505.7	SYT13	0	0.0907519	0.0856227	0	0	0	ENSG00000019505.7	SYT13	chr11:45240300-45286319	MB468_CTRL	MB468_W2	NOTEST	0.0587915	0	#NAME?	0	1	1	no
ENSG00000019549.8	SNAI2	0	0	0	0	0	0	ENSG00000019549.8	SNAI2	chr8:48917689-48921740	MB468_CTRL	MB468_W2	NOTEST	0	0	0	0	1	1	no
ENSG00000019582.14	CD74	0	0	0.225589	0	0	0	ENSG00000019582.14	CD74	chr5:150401636-150412929	MB468_CTRL	MB468_W2	NOTEST	0.0751964	0	#NAME?	0	1	1	no
ENSG00000019991.15	HGF	0	0	0	0	0	0	ENSG00000019991.15	HGF	chr7:81699005-81770438	MB468_CTRL	MB468_W2	NOTEST	0	0	0	0	1	1	no
ENSG00000019995.6	ZRANB1	7.28439	8.84162	7.51034	10.9011	7.52343	8.07647	ENSG00000019995.6	ZRANB1	chr10:124917142-125161170	MB468_CTRL	MB468_W2	OK	7.87879	8.83368	0.165041	0.413352	0.44565	0.646403	no
ENSG00000020129.15	NCDN	14.5136	19.9513	15.7141	17.037	17.4826	15.55	ENSG00000020129.15	NCDN	chr1:35433489-35567274	MB468_CTRL	MB468_W2	OK	16.7263	16.6899	-0.00314754	-0.00836111	0.9874	0.993553	no
ENSG00000020181.17	ADGRA2	0.55687	0.44594	0.980099	1.52659	0.999111	0.4688	ENSG00000020181.17	ADGRA2	chr8:37784190-37849904	MB468_CTRL	MB468_W2	NOTEST	0.66097	0.998168	0.594698	0	1	1	no
ENSG00000020219.9	CCT8L1P	0	0	0	0	0	0	ENSG00000020219.9	CCT8L1P	chr7:152445476-152447150	MB468_CTRL	MB468_W2	NOTEST	0	0	0	0	1	1	no
ENSG00000020256.19	ZFP64	13.2913	12.9764	13.4795	13.4165	12.7075	15.7424	ENSG00000020256.19	ZFP64	chr20:52051662-52204308	MB468_CTRL	MB468_W2	OK	13.2491	13.9554	0.0749344	0.227392	0.651	0.803274	no
ENSG00000020426.10	MNAT1	39.2648	17.4893	27.8707	57.259	59.4037	43.4497	ENSG00000020426.10	MNAT1	chr14:60734741-61083733	MB468_CTRL	MB468_W2	OK	28.2083	53.3708	0.919933	1.40124	0.01335	0.0530411	no
ENSG00000020577.13	SAMD4A	1.28486	1.54823	2.66047	5.26787	4.57766	5.14866	ENSG00000020577.13	SAMD4A	chr14:54567096-54793315	MB468_CTRL	MB468_W2	OK	1.83118	4.99806	1.44859	1.06306	0.0042	0.0209155	yes
ENSG00000020633.18	RUNX3	13.4857	18.5163	14.3226	21.7939	18.8604	18.6491	ENSG00000020633.18	RUNX3	chr1:24899510-24965121	MB468_CTRL	MB468_W2	OK	15.4415	19.7678	0.356335	1.38107	0.0123	0.0496607	yes
ENSG00000020922.12	MRE11A	11.0466	12.3496	9.34556	7.60997	18.7961	11.3834	ENSG00000020922.12	MRE11A	chr11:94415577-94499583	MB468_CTRL	MB468_W2	OK	10.9139	12.5965	0.20685	0.336301	0.51185	0.699647	no
ENSG00000021300.13	PLEKHB1	0.384778	1.94282	0.767886	0.268161	0	0.598269	ENSG00000021300.13	PLEKHB1	chr11:73646177-73662819	MB468_CTRL	MB468_W2	NOTEST	1.03183	0.28881	-1.83701	0	1	1	no
ENSG00000021355.12	SERPINB1	104.775	105.851	114.854	55.2612	61.5093	71.0669	ENSG00000021355.12	SERPINB1	chr6:2832331-2842006	MB468_CTRL	MB468_W2	OK	108.494	62.6125	-0.793088	-3.6991	5e-05	0.000470501	yes
ENSG00000021461.16	CYP3A43	0	0.824254	0	0	0	0	ENSG00000021461.16	CYP3A43	chr7:99828012-99866102	MB468_CTRL	MB468_W2	NOTEST	0.274751	0	#NAME?	0	1	1	no
ENSG00000021488.12	SLC7A9	0	0	0	0	0	0	ENSG00000021488.12	SLC7A9	chr19:32830508-32869766	MB468_CTRL	MB468_W2	NOTEST	0	0	0	0	1	1	no
ENSG00000021574.11	SPAST	11.8102	13.5131	13.0608	8.20561	6.45717	7.778	ENSG00000021574.11	SPAST	chr2:32063610-32157637	MB468_CTRL	MB468_W2	OK	12.7947	7.48026	-0.774383	-4.0053	5e-05	0.000470501	yes
ENSG00000021645.18	NRXN3	0	0	0	0	0	0	ENSG00000021645.18	NRXN3	chr14:78170372-79868290	MB468_CTRL	MB468_W2	NOTEST	0	0	0	0	1	1	no
ENSG00000021762.19	OSBPL5	11.891	14.5944	12.0174	18.949	21.532	17.2929	ENSG00000021762.19	OSBPL5	chr11:3087115-3166739	MB468_CTRL	MB468_W2	OK	12.8343	19.258	0.585457	1.49837	0.0032	0.0167984	yes
ENSG00000021776.10	AQR	8.87366	10.4371	9.80202	7.32744	10.0773	12.1981	ENSG00000021776.10	AQR	chr15:34851781-34969839	MB468_CTRL	MB468_W2	OK	9.70426	9.8676	0.024081	0.0440594	0.91685	0.959328	no
ENSG00000021826.14	CPS1	0.0391277	0	0.038285	0	0	0	ENSG00000021826.14	CPS1	chr2:210477681-210679107	MB468_CTRL	MB468_W2	NOTEST	0.0258043	0	#NAME?	0	1	1	no
ENSG00000022267.16	FHL1	0	0	0	0	0	0.195041	ENSG00000022267.16	FHL1	chrX:136146701-136211359	MB468_CTRL	MB468_W2	NOTEST	0	0.0650136	inf	0	1	1	no
ENSG00000022277.12	RTFDC1	30.7718	33.0699	36.2098	20.3155	22.3445	28.3851	ENSG00000022277.12	RTFDC1	chr20:56468584-56526142	MB468_CTRL	MB468_W2	OK	33.3505	23.6817	-0.493933	-2.4244	5e-05	0.000470501	yes
ENSG00000022355.16	GABRA1	0	0	0	0	0	0	ENSG00000022355.16	GABRA1	chr5:161847062-161899981	MB468_CTRL	MB468_W2	NOTEST	0	0	0	0	1	1	no
ENSG00000022556.15	NLRP2	25.8538	30.0008	28.5289	29.6849	25.4562	23.9181	ENSG00000022556.15	NLRP2	chr19:54923508-55001142	MB468_CTRL	MB468_W2	OK	28.1278	26.3531	-0.0940264	-0.325688	0.51095	0.698912	no
ENSG00000022567.9	SLC45A4	18.1888	18.5605	16.0763	14.6106	37.0703	24.8886	ENSG00000022567.9	SLC45A4	chr8:141207165-141308305	MB468_CTRL	MB468_W2	OK	17.6085	25.5231	0.535532	1.22385	0.03995	0.12412	no
ENSG00000022840.15	RNF10	57.17	58.2679	73.7848	56.886	73.1496	103.276	ENSG00000022840.15	RNF10	chr12:120503273-120577594	MB468_CTRL	MB468_W2	OK	63.0742	77.7706	0.302174	0.737724	0.1839	0.368645	no
ENSG00000022976.15	ZNF839	3.49053	3.17574	3.32834	5.57225	8.38293	6.71565	ENSG00000022976.15	ZNF839	chr14:102317376-102362916	MB468_CTRL	MB468_W2	OK	3.33153	6.89028	1.04838	1.81206	5e-05	0.000470501	yes
ENSG00000023041.11	ZDHHC6	18.7496	18.2401	13.846	20.7067	26.2153	23.667	ENSG00000023041.11	ZDHHC6	chr10:112374017-112446917	MB468_CTRL	MB468_W2	OK	16.9452	23.5297	0.4736	1.29839	0.0182	0.0675647	no
ENSG00000023171.15	GRAMD1B	7.04872	6.04439	6.86334	7.5014	9.00192	10.5083	ENSG00000023171.15	GRAMD1B	chr11:123358427-123627774	MB468_CTRL	MB468_W2	OK	6.65215	9.00386	0.436724	0.896979	0.0741	0.196237	no
ENSG00000023191.16	RNH1	60.2883	63.0814	65.9973	35.4697	57.2716	49.2529	ENSG00000023191.16	RNH1	chr11:494511-507300	MB468_CTRL	MB468_W2	OK	63.1223	47.3314	-0.415353	-2.05292	0.0001	0.000882755	yes
ENSG00000023228.13	NDUFS1	49.7815	56.8703	57.7392	34.4228	27.7834	35.8246	ENSG00000023228.13	NDUFS1	chr2:206114816-206162928	MB468_CTRL	MB468_W2	OK	54.797	32.6769	-0.745824	-1.92743	0.0013	0.00802013	yes
ENSG00000023287.12	RB1CC1	18.8754	18.1648	27.069	9.75303	14.942	17.8611	ENSG00000023287.12	RB1CC1	chr8:52622455-52745843	MB468_CTRL	MB468_W2	OK	21.3697	14.1854	-0.591165	-0.972994	0.06175	0.171719	no
ENSG00000023318.7	ERP44	12.3808	12.6677	13.9979	8.6145	8.20464	9.06837	ENSG00000023318.7	ERP44	chr9:99979178-100099040	MB468_CTRL	MB468_W2	OK	13.0154	8.62917	-0.592931	-3.32056	5e-05	0.000470501	yes
ENSG00000023330.14	ALAS1	11.1876	14.5344	12.404	9.35246	14.1596	14.9942	ENSG00000023330.14	ALAS1	chr3:52198085-52214327	MB468_CTRL	MB468_W2	OK	12.7087	12.8354	0.0143193	0.0372671	0.93725	0.969795	no
ENSG00000023445.13	BIRC3	11.3368	14.7627	12.6159	10.4695	14.0335	13.2265	ENSG00000023445.13	BIRC3	chr11:102317449-102339403	MB468_CTRL	MB468_W2	OK	12.9052	12.5765	-0.0372148	-0.0711746	0.8917	0.947459	no
ENSG00000023516.8	AKAP11	8.10373	8.45689	8.73251	5.78835	5.81197	6.2093	ENSG00000023516.8	AKAP11	chr13:42272152-42323267	MB468_CTRL	MB468_W2	OK	8.43104	5.93654	-0.506089	-3.17008	5e-05	0.000470501	yes
ENSG00000023572.8	GLRX2	42.205	42.0057	48.4747	28.81	35.2841	33.7871	ENSG00000023572.8	GLRX2	chr1:193096467-193106114	MB468_CTRL	MB468_W2	OK	44.2285	32.6271	-0.438906	-1.54628	0.0062	0.0287031	yes
ENSG00000023608.4	SNAPC1	2.10528	2.86046	3.74609	1.62613	3.59375	2.77356	ENSG00000023608.4	SNAPC1	chr14:61681040-61796428	MB468_CTRL	MB468_W2	OK	2.90394	2.66448	-0.124161	-0.171143	0.7792	0.885805	no
ENSG00000023697.12	DERA	14.6282	18.7092	21.5166	10.3367	17.7688	15.32	ENSG00000023697.12	DERA	chr12:15911171-16037282	MB468_CTRL	MB468_W2	OK	18.2846	14.4752	-0.337054	-0.719674	0.1462	0.314911	no
ENSG00000023734.10	STRAP	62.1407	66.8196	60.903	36.4874	46.5552	45.8599	ENSG00000023734.10	STRAP	chr12:15882390-15903478	MB468_CTRL	MB468_W2	OK	63.2878	42.9675	-0.558681	-2.78249	5e-05	0.000470501	yes
ENSG00000023839.10	ABCC2	0.228575	0.463847	0.480112	0.149732	0.475301	0.618781	ENSG00000023839.10	ABCC2	chr10:99782731-99852192	MB468_CTRL	MB468_W2	NOTEST	0.390845	0.414605	0.0851416	0	1	1	no
ENSG00000023892.10	DEF6	0.240433	0.33131	1.06255	0.364835	1.16123	6.01461	ENSG00000023892.10	DEF6	chr6:35297851-35321771	MB468_CTRL	MB468_W2	NOTEST	0.544766	2.51356	2.20602	0	1	1	no
ENSG00000023902.13	PLEKHO1	1.28683	1.86592	1.31716	3.35044	2.12656	2.99777	ENSG00000023902.13	PLEKHO1	chr1:150149182-150164720	MB468_CTRL	MB468_W2	OK	1.48997	2.82492	0.922928	0.734738	0.03865	0.121212	no
ENSG00000023909.9	GCLM	31.7233	32.0868	33.8394	27.5605	37.4874	34.4188	ENSG00000023909.9	GCLM	chr1:93885204-93909456	MB468_CTRL	MB468_W2	OK	32.5498	33.1556	0.026602	0.129207	0.81115	0.903793	no
ENSG00000024048.10	UBR2	8.53484	8.22428	9.39123	6.76714	7.98564	10.493	ENSG00000024048.10	UBR2	chr6:42564061-42693504	MB468_CTRL	MB468_W2	OK	8.71678	8.41526	-0.0507875	-0.232746	0.65785	0.808162	no
ENSG00000024422.11	EHD2	0.822295	1.53722	1.05443	0.625136	0.879825	1.39378	ENSG00000024422.11	EHD2	chr19:47607523-47743134	MB468_CTRL	MB468_W2	NOTEST	1.13798	0.966247	-0.236014	0	1	1	no
ENSG00000024526.16	DEPDC1	31.6411	32.4105	33.0283	40.5191	36.6412	44.7152	ENSG00000024526.16	DEPDC1	chr1:68474151-68538627	MB468_CTRL	MB468_W2	OK	32.3599	40.6252	0.328165	1.45765	0.0108	0.0448089	yes
ENSG00000024862.17	CCDC28A	9.45783	9.2599	8.08541	5.38654	6.87942	5.80835	ENSG00000024862.17	CCDC28A	chr6:138725210-138793319	MB468_CTRL	MB468_W2	OK	8.93438	6.02477	-0.568461	-1.56102	0.0072	0.0322373	yes
ENSG00000025039.14	RRAGD	14.9563	14.1898	15.9406	7.4495	6.75326	9.95048	ENSG00000025039.14	RRAGD	chr6:89364635-89412270	MB468_CTRL	MB468_W2	OK	15.0289	8.05108	-0.900484	-3.33283	5e-05	0.000470501	yes
ENSG00000025156.12	HSF2	8.29155	10.5095	8.56253	9.30396	10.2142	6.86109	ENSG00000025156.12	HSF2	chr6:122399545-122433119	MB468_CTRL	MB468_W2	OK	9.1212	8.79308	-0.0528551	-0.128038	0.82305	0.910712	no
ENSG00000025293.16	PHF20	13.5231	13.6411	10.8793	11.2994	14.3631	8.28301	ENSG00000025293.16	PHF20	chr20:35771973-35950381	MB468_CTRL	MB468_W2	OK	12.6811	11.3151	-0.16443	-0.250297	0.58805	0.757662	no
ENSG00000025423.11	HSD17B6	2.07698	0.628089	2.02958	0.641464	0.442054	0	ENSG00000025423.11	HSD17B6	chr12:56712427-56787790	MB468_CTRL	MB468_W2	NOTEST	1.57822	0.361173	-2.12754	0	1	1	no
ENSG00000025434.18	NR1H3	16.1067	11.2882	10.3386	17.5844	33.3399	13.5769	ENSG00000025434.18	NR1H3	chr11:47239301-47269032	MB468_CTRL	MB468_W2	OK	12.5779	21.5004	0.773476	1.02649	0.02215	0.0789422	no
ENSG00000025708.13	TYMP	1.68588	1.41217	1.71802	2.47836	2.031	3.79819	ENSG00000025708.13	TYMP	chr22:50523567-50532580	MB468_CTRL	MB468_W2	OK	1.60536	2.76918	0.786563	0.773336	0.07145	0.19111	no
ENSG00000025770.18	NCAPH2	17.788	18.1678	16.296	16.5607	26.0993	15.7148	ENSG00000025770.18	NCAPH2	chr22:50508215-50523472	MB468_CTRL	MB468_W2	OK	17.4173	19.4583	0.159864	0.417159	0.4264	0.629011	no
ENSG00000025772.7	TOMM34	18.9933	24.7816	20.374	15.6298	12.8029	16.1473	ENSG00000025772.7	TOMM34	chr20:44910061-44960486	MB468_CTRL	MB468_W2	OK	21.383	14.86	-0.525028	-1.52423	0.0209	0.0754335	no
ENSG00000025796.13	SEC63	39.364	45.6157	45.0864	42.3713	50.3373	31.557	ENSG00000025796.13	SEC63	chr6:107867755-107959986	MB468_CTRL	MB468_W2	OK	43.3554	41.4218	-0.0658189	-0.155495	0.7283	0.85406	no
ENSG00000025800.13	KPNA6	35.7207	40.7355	38.3476	22.6276	25.3877	26.0135	ENSG00000025800.13	KPNA6	chr1:32108037-32176568	MB468_CTRL	MB468_W2	OK	38.2679	24.6763	-0.633011	-4.15362	5e-05	0.000470501	yes
ENSG00000026025.14	VIM	48.5302	46.272	42.4296	6.24765	10.4276	12.8809	ENSG00000026025.14	VIM	chr10:17214238-17237593	MB468_CTRL	MB468_W2	OK	45.7439	9.85204	-2.21509	-3.04552	5e-05	0.000470501	yes
ENSG00000026036.21	RTEL1-TNFRSF6B	1.05662	1.46659	1.47749	2.55802	5.62302	3.89419	ENSG00000026036.21	RTEL1-TNFRSF6B	chr20:63657809-63743505	MB468_CTRL	MB468_W2	OK	1.33356	4.02508	1.59373	2.44785	5e-05	0.000470501	yes
ENSG00000026103.20	FAS	0.365698	0.545772	0.642562	0.863214	0	0.654122	ENSG00000026103.20	FAS	chr10:88879733-89015785	MB468_CTRL	MB468_W2	NOTEST	0.518011	0.505779	-0.034476	0	1	1	no
ENSG00000026297.15	RNASET2	8.47799	7.88915	8.28861	10.2251	9.54272	6.93875	ENSG00000026297.15	RNASET2	chr6:166409363-166957191	MB468_CTRL	MB468_W2	OK	8.21858	8.90219	0.115271	0.189532	0.67445	0.819274	no
ENSG00000026508.16	CD44	519.778	598.724	560.319	289.773	327.021	300.673	ENSG00000026508.16	CD44	chr11:35138869-35232402	MB468_CTRL	MB468_W2	OK	559.607	305.822	-0.87172	-3.51651	5e-05	0.000470501	yes
ENSG00000026559.13	KCNG1	15.1014	15.1507	10.5601	11.5474	11.7001	16.6047	ENSG00000026559.13	KCNG1	chr20:50999369-51023129	MB468_CTRL	MB468_W2	OK	13.6041	13.2841	-0.0343426	-0.0934593	0.8682	0.936195	no
ENSG00000026652.13	AGPAT4	0	0.0667121	0.022851	0.0596411	0.0775037	0.0619921	ENSG00000026652.13	AGPAT4	chr6:161129978-161274061	MB468_CTRL	MB468_W2	NOTEST	0.0298544	0.0663789	1.15278	0	1	1	no
ENSG00000026751.16	SLAMF7	0.349444	0.169598	0.115175	0	0	0.161541	ENSG00000026751.16	SLAMF7	chr1:160739056-160754821	MB468_CTRL	MB468_W2	NOTEST	0.211405	0.0538469	-1.97308	0	1	1	no
ENSG00000026950.16	BTN3A1	3.35569	3.86948	4.09525	12.4217	8.87396	7.85402	ENSG00000026950.16	BTN3A1	chr6:26402236-26415216	MB468_CTRL	MB468_W2	OK	3.77347	9.71654	1.36455	1.77177	5e-05	0.000470501	yes
ENSG00000027001.9	MIPEP	16.5168	8.50387	6.81025	6.01495	3.53686	4.72079	ENSG00000027001.9	MIPEP	chr13:23730188-23902655	MB468_CTRL	MB468_W2	OK	10.6103	4.75753	-1.15718	-1.30919	0.0127	0.0508889	no
ENSG00000027075.13	PRKCH	9.37586	13.857	6.69148	15.0163	6.2119	15.5104	ENSG00000027075.13	PRKCH	chr14:61187558-61658696	MB468_CTRL	MB468_W2	OK	9.97477	12.2462	0.295978	0.310878	0.3836	0.589827	no
ENSG00000027644.4	INSRR	0	0	0	0	0	0	ENSG00000027644.4	INSRR	chr1:156806242-156881850	MB468_CTRL	MB468_W2	NOTEST	0	0	0	0	1	1	no
ENSG00000027697.13	IFNGR1	79.177	85.3194	92.3957	88.0671	108.278	78.2511	ENSG00000027697.13	IFNGR1	chr6:137197483-137219449	MB468_CTRL	MB468_W2	OK	85.6307	91.532	0.0961477	0.517294	0.35625	0.564346	no
ENSG00000027847.13	B4GALT7	8.5104	8.997	8.92637	9.20398	12.0388	14.3089	ENSG00000027847.13	B4GALT7	chr5:177600099-177610347	MB468_CTRL	MB468_W2	OK	8.81125	11.8506	0.427539	0.982298	0.04945	0.145624	no
ENSG00000027869.11	SH2D2A	1.06823	1.7067	2.57651	0	0.405377	0.670111	ENSG00000027869.11	SH2D2A	chr1:156806242-156881850	MB468_CTRL	MB468_W2	NOTEST	1.78381	0.358496	-2.31493	0	1	1	no
ENSG00000028116.16	VRK2	7.75618	8.77923	9.34247	6.01814	6.01079	7.40989	ENSG00000028116.16	VRK2	chr2:57907650-58241686	MB468_CTRL	MB468_W2	OK	8.62596	6.47961	-0.412778	-0.730965	0.1461	0.314825	no
ENSG00000028137.17	TNFRSF1B	0	0	0	0	0	0	ENSG00000028137.17	TNFRSF1B	chr1:12166942-12209228	MB468_CTRL	MB468_W2	NOTEST	0	0	0	0	1	1	no
ENSG00000028203.17	VEZT	19.7039	17.042	16.6584	13.7808	19.4363	18.6464	ENSG00000028203.17	VEZT	chr12:95217745-95302790	MB468_CTRL	MB468_W2	OK	17.8014	17.2878	-0.0422325	-0.0734474	0.85545	0.929144	no
ENSG00000028277.21	POU2F2	0.828931	0.10735	0.410267	0.129815	0.999014	0.916412	ENSG00000028277.21	POU2F2	chr19:42086109-42196585	MB468_CTRL	MB468_W2	NOTEST	0.448849	0.681747	0.603005	0	1	1	no
ENSG00000028310.17	BRD9	17.5874	21.3092	21.4142	44.0571	66.7059	64.5605	ENSG00000028310.17	BRD9	chr5:795605-919357	MB468_CTRL	MB468_W2	OK	20.1036	58.4411	1.53953	4.33976	5e-05	0.000470501	yes
ENSG00000028528.14	SNX1	6.62703	6.76572	7.86009	15.4016	14.3331	6.92853	ENSG00000028528.14	SNX1	chr15:64094122-64146090	MB468_CTRL	MB468_W2	OK	7.08428	12.2211	0.786678	0.845131	0.0382	0.12016	no
ENSG00000028839.9	TBPL1	15.9744	11.9159	26.689	16.6106	20.2031	16.5475	ENSG00000028839.9	TBPL1	chr6:133952169-134052636	MB468_CTRL	MB468_W2	OK	18.1931	17.7871	-0.032562	-0.0526318	0.9169	0.959328	no
ENSG00000029153.14	ARNTL2	7.34077	8.43276	9.98341	8.55765	6.24865	5.63803	ENSG00000029153.14	ARNTL2	chr12:27332853-27446625	MB468_CTRL	MB468_W2	OK	8.58565	6.81478	-0.333261	-0.676877	0.191	0.377631	no
ENSG00000029363.15	BCLAF1	66.1351	69.016	73.2546	47.0162	58.9939	60.2293	ENSG00000029363.15	BCLAF1	chr6:136256862-136289851	MB468_CTRL	MB468_W2	OK	69.4685	55.4132	-0.326131	-0.991755	0.07755	0.20265	no
ENSG00000029364.11	SLC39A9	21.9846	23.181	23.5908	18.5236	18.0294	17.6545	ENSG00000029364.11	SLC39A9	chr14:69380122-69462388	MB468_CTRL	MB468_W2	OK	22.9188	18.0692	-0.343003	-1.1027	0.04565	0.137246	no
ENSG00000029534.19	ANK1	0.36917	0.691313	1.49803	1.66665	0.784353	0.777768	ENSG00000029534.19	ANK1	chr8:41653219-41896762	MB468_CTRL	MB468_W2	NOTEST	0.852838	1.07626	0.335679	0	1	1	no
ENSG00000029559.6	IBSP	0	0	0	0	0	0	ENSG00000029559.6	IBSP	chr4:87799580-87812435	MB468_CTRL	MB468_W2	NOTEST	0	0	0	0	1	1	no
ENSG00000029639.10	TFB1M	8.47	7.46216	6.65615	8.4844	17.21	6.82044	ENSG00000029639.10	TFB1M	chr6:154733324-155314493	MB468_CTRL	MB468_W2	OK	7.52944	10.8383	0.525524	0.531171	0.26205	0.463769	no
ENSG00000029725.16	RABEP1	22.8804	21.7473	22.3659	16.1623	14.6148	14.2114	ENSG00000029725.16	RABEP1	chr17:5282264-5469060	MB468_CTRL	MB468_W2	OK	22.3312	14.9962	-0.574467	-0.713658	0.08145	0.209598	no
ENSG00000029993.14	HMGB3	147.538	162.675	171.415	108.678	92.0301	105.64	ENSG00000029993.14	HMGB3	chrX:150980508-150990775	MB468_CTRL	MB468_W2	OK	160.543	102.116	-0.652748	-2.47055	0.0002	0.00163443	yes
ENSG00000030066.13	NUP160	45.186	41.0006	39.9574	31.0519	43.6229	36.1946	ENSG00000030066.13	NUP160	chr11:47778086-47848555	MB468_CTRL	MB468_W2	OK	42.048	36.9565	-0.186209	-0.536268	0.3408	0.549248	no
ENSG00000030110.12	BAK1	11.0695	14.037	11.3536	14.1284	11.7738	14.4724	ENSG00000030110.12	BAK1	chr6:33540045-33593338	MB468_CTRL	MB468_W2	OK	12.1534	13.4582	0.147128	0.549574	0.3375	0.545946	no
ENSG00000030304.13	MUSK	0	0	0	0	0	0	ENSG00000030304.13	MUSK	chr9:110668770-110801620	MB468_CTRL	MB468_W2	NOTEST	0	0	0	0	1	1	no
ENSG00000030419.16	IKZF2	8.16703	11.2617	6.76669	12.0184	3.96341	6.28891	ENSG00000030419.16	IKZF2	chr2:212581356-213152427	MB468_CTRL	MB468_W2	OK	8.73181	7.42356	-0.23417	-0.318947	0.5257	0.710942	no
ENSG00000030582.16	GRN	49.6897	52.1432	61.2291	42.5805	35.4516	35.5831	ENSG00000030582.16	GRN	chr17:44345085-44353102	MB468_CTRL	MB468_W2	OK	54.354	37.8717	-0.521266	-1.19361	0.02225	0.0792062	no
ENSG00000031003.10	FAM13B	23.2194	22.2503	26.2091	14.9899	28.6045	16.5292	ENSG00000031003.10	FAM13B	chr5:137814332-138051961	MB468_CTRL	MB468_W2	OK	23.893	20.0412	-0.253615	-0.407095	0.3607	0.568741	no
ENSG00000031081.10	ARHGAP31	5.79874	5.534	2.79826	2.47051	6.76332	5.48811	ENSG00000031081.10	ARHGAP31	chr3:119294372-119420714	MB468_CTRL	MB468_W2	OK	4.71033	4.90731	0.0591034	0.0645738	0.90675	0.955006	no
ENSG00000031691.6	CENPQ	7.85655	5.15437	6.81105	6.96098	8.10871	5.14751	ENSG00000031691.6	CENPQ	chr6:49463377-49493107	MB468_CTRL	MB468_W2	OK	6.60732	6.73907	0.0284837	0.0951767	0.8736	0.938924	no
ENSG00000031698.12	SARS	63.2536	70.4929	78.2726	66.3222	75.6702	67.8869	ENSG00000031698.12	SARS	chr1:109213917-109238169	MB468_CTRL	MB468_W2	OK	70.673	69.9598	-0.0146334	-0.0618463	0.9145	0.958157	no
ENSG00000031823.14	RANBP3	30.9249	37.9029	53.3623	20.6937	45.8968	57.7841	ENSG00000031823.14	RANBP3	chr19:5904840-5978142	MB468_CTRL	MB468_W2	OK	40.73	41.4582	0.0255644	0.0409104	0.9329	0.96786	no
ENSG00000032219.18	ARID4A	4.1374	4.00461	5.12978	5.67595	9.11157	10.0893	ENSG00000032219.18	ARID4A	chr14:58298384-58395641	MB468_CTRL	MB468_W2	OK	4.42393	8.29227	0.906438	1.39851	0.0049	0.023687	yes
ENSG00000032389.12	TSSC1	30.2849	36.7878	34.7334	21.3505	18.4154	25.1661	ENSG00000032389.12	TSSC1	chr2:3188924-3377882	MB468_CTRL	MB468_W2	OK	33.9354	21.644	-0.648821	-2.26054	5e-05	0.000470501	yes
ENSG00000032444.15	PNPLA6	16.1653	19.6447	22.2788	15.081	14.0829	27.1726	ENSG00000032444.15	PNPLA6	chr19:7522625-7561764	MB468_CTRL	MB468_W2	OK	19.3629	18.7788	-0.0441905	-0.087477	0.85375	0.928232	no
ENSG00000032742.17	IFT88	1.85854	2.84138	6.5798	1.98206	1.6826	1.54785	ENSG00000032742.17	IFT88	chr13:20567068-20691437	MB468_CTRL	MB468_W2	OK	3.75991	1.7375	-1.11368	-0.843287	0.04015	0.124625	no
ENSG00000033011.11	ALG1	5.95601	5.84328	8.60605	3.61684	4.84888	10.5035	ENSG00000033011.11	ALG1	chr16:4882506-5097808	MB468_CTRL	MB468_W2	OK	6.80178	6.32307	-0.105288	-0.135783	0.78265	0.887829	no
ENSG00000033030.13	ZCCHC8	9.73517	8.72691	8.80867	9.30239	19.9406	25.2566	ENSG00000033030.13	ZCCHC8	chr12:122471599-122501073	MB468_CTRL	MB468_W2	OK	9.09025	18.1665	0.998892	1.88156	0.0011	0.00698981	yes
ENSG00000033050.7	ABCF2	28.9876	35.7956	33.6574	24.5241	22.4353	25.348	ENSG00000033050.7	ABCF2	chr7:151207836-151227230	MB468_CTRL	MB468_W2	OK	32.8135	24.1025	-0.44511	-1.90968	0.00115	0.0072622	yes
ENSG00000033100.15	CHPF2	10.7246	14.6064	11.9629	16.761	18.5414	16.4683	ENSG00000033100.15	CHPF2	chr7:151232488-151277896	MB468_CTRL	MB468_W2	OK	12.4313	17.2569	0.473193	1.09643	0.02595	0.0893573	no
ENSG00000033122.18	LRRC7	0	0.0354039	0	0	0	0	ENSG00000033122.18	LRRC7	chr1:69568397-70205620	MB468_CTRL	MB468_W2	NOTEST	0.0118013	0	#NAME?	0	1	1	no
ENSG00000033170.16	FUT8	12.0083	15.0098	11.8404	8.65197	7.26811	9.86951	ENSG00000033170.16	FUT8	chr14:65410591-65744121	MB468_CTRL	MB468_W2	OK	12.9528	8.59653	-0.591442	-1.12884	0.00775	0.0342645	yes
ENSG00000033178.12	UBA6	18.5722	21.9931	21.7031	14.1396	8.10268	17.2706	ENSG00000033178.12	UBA6	chr4:67612651-67701179	MB468_CTRL	MB468_W2	OK	20.7561	13.171	-0.656178	-1.5694	0.00995	0.0418988	yes
ENSG00000033327.12	GAB2	23.4137	28.8349	27.668	9.26434	26.936	15.1727	ENSG00000033327.12	GAB2	chr11:78215296-78574874	MB468_CTRL	MB468_W2	OK	26.6388	17.1243	-0.637483	-1.15542	0.05385	0.15519	no
ENSG00000033627.15	ATP6V0A1	10.0929	17.6282	14.9218	15.8993	24.7654	11.6753	ENSG00000033627.15	ATP6V0A1	chr17:42458843-42522611	MB468_CTRL	MB468_W2	OK	14.2143	17.4467	0.295608	0.522762	0.2075	0.398663	no
ENSG00000033800.13	PIAS1	11.5176	8.75084	10.2755	11.615	15.2395	14.9173	ENSG00000033800.13	PIAS1	chr15:68054178-68257211	MB468_CTRL	MB468_W2	OK	10.1813	13.924	0.451648	0.736638	0.2057	0.396201	no
ENSG00000033867.16	SLC4A7	13.1914	19.5655	17.3745	13.8146	16.7053	20.6847	ENSG00000033867.16	SLC4A7	chr3:27372720-27484420	MB468_CTRL	MB468_W2	OK	16.7105	17.0682	0.0305575	0.0769672	0.88435	0.944055	no
ENSG00000034053.14	APBA2	0	0	0	0	1.71956	0	ENSG00000034053.14	APBA2	chr15:28884482-29118315	MB468_CTRL	MB468_W2	NOTEST	0	0.573188	inf	0	1	1	no
ENSG00000034152.18	MAP2K3	24.6434	21.8404	34.4159	31.9042	20.0453	38.0098	ENSG00000034152.18	MAP2K3	chr17:21284671-21315240	MB468_CTRL	MB468_W2	OK	26.9665	29.9864	0.153139	0.238088	0.663	0.811531	no
ENSG00000034239.10	EFCAB1	0	0	0	0	0	0	ENSG00000034239.10	EFCAB1	chr8:48710788-48735311	MB468_CTRL	MB468_W2	NOTEST	0	0	0	0	1	1	no
ENSG00000034510.5	TMSB10	304.739	303.708	325.641	258.288	395.557	332.582	ENSG00000034510.5	TMSB10	chr2:84821649-84907008	MB468_CTRL	MB468_W2	OK	311.362	328.809	0.0786542	0.518741	0.36375	0.571436	no
ENSG00000034533.11	ASTE1	4.34311	4.13724	4.29266	4.74488	3.67827	2.37666	ENSG00000034533.11	ASTE1	chr3:130850594-131381475	MB468_CTRL	MB468_W2	OK	4.25767	3.59994	-0.242093	-0.243938	0.58175	0.752747	no
ENSG00000034677.12	RNF19A	26.2054	46.119	32.1153	28.1017	47.4765	22.4378	ENSG00000034677.12	RNF19A	chr8:100157905-100336218	MB468_CTRL	MB468_W2	OK	34.8132	32.672	-0.091581	-0.129301	0.7957	0.895481	no
ENSG00000034693.14	PEX3	10.5116	13.4895	12.9294	9.03564	9.81514	7.43638	ENSG00000034693.14	PEX3	chr6:143450806-143511690	MB468_CTRL	MB468_W2	OK	12.3102	8.76239	-0.490455	-0.938146	0.0844	0.214926	no
ENSG00000034713.7	GABARAPL2	61.3801	71.5056	75.3088	72.56	105.348	82.6328	ENSG00000034713.7	GABARAPL2	chr16:75528531-75623300	MB468_CTRL	MB468_W2	OK	69.3982	86.847	0.323578	1.44484	0.01075	0.0446368	yes
ENSG00000034971.15	MYOC	0	0	0	0	0	0	ENSG00000034971.15	MYOC	chr1:171600620-171652683	MB468_CTRL	MB468_W2	NOTEST	0	0	0	0	1	1	no
ENSG00000035115.21	SH3YL1	31.3734	32.844	37.0505	23.2822	42.3858	34.2596	ENSG00000035115.21	SH3YL1	chr2:217729-278283	MB468_CTRL	MB468_W2	OK	33.756	33.3092	-0.019221	-0.0359873	0.9474	0.974654	no
ENSG00000035141.7	FAM136A	44.0339	38.5234	43.6846	53.3737	55.1696	46.7339	ENSG00000035141.7	FAM136A	chr2:70295974-70302090	MB468_CTRL	MB468_W2	OK	42.0806	51.7591	0.298655	1.43882	0.01415	0.0556346	no
ENSG00000035403.16	VCL	73.1215	76.5459	73.3489	34.4931	37.2322	38.3407	ENSG00000035403.16	VCL	chr10:73995192-74151063	MB468_CTRL	MB468_W2	OK	74.3388	36.6887	-1.01878	-3.72092	5e-05	0.000470501	yes
ENSG00000035499.12	DEPDC1B	15.169	16.1866	14.7912	8.34261	17.3987	14.2565	ENSG00000035499.12	DEPDC1B	chr5:60596911-60700190	MB468_CTRL	MB468_W2	OK	15.3822	13.3326	-0.206308	-0.553737	0.3038	0.510751	no
ENSG00000035664.11	DAPK2	2.53371	3.64308	0.359468	0.438197	4.46091	4.33262	ENSG00000035664.11	DAPK2	chr15:63907035-64072033	MB468_CTRL	MB468_W2	OK	2.17875	3.07724	0.498137	0.321347	0.37145	0.578646	no
ENSG00000035681.7	NSMAF	7.43031	10.0498	7.23057	8.04394	11.0877	14.1896	ENSG00000035681.7	NSMAF	chr8:58583503-58659844	MB468_CTRL	MB468_W2	OK	8.2369	11.1071	0.431306	0.647642	0.1149	0.267198	no
ENSG00000035687.9	ADSS	40.8905	37.8279	35.5584	23.3648	27.3719	34.9922	ENSG00000035687.9	ADSS	chr1:244352634-244452134	MB468_CTRL	MB468_W2	OK	38.0923	28.5763	-0.414679	-1.87854	0.0033	0.017232	yes
ENSG00000035720.7	STAP1	0	0	0	0	0	0	ENSG00000035720.7	STAP1	chr4:67558727-67607337	MB468_CTRL	MB468_W2	NOTEST	0	0	0	0	1	1	no
ENSG00000035862.12	TIMP2	8.61009	13.0017	10.1417	8.31083	7.23887	11.5584	ENSG00000035862.12	TIMP2	chr17:78852976-78925387	MB468_CTRL	MB468_W2	OK	10.5845	9.03604	-0.228191	-0.972966	0.0894	0.224277	no
ENSG00000035928.14	RFC1	24.8266	25.7221	21.9284	16.1811	17.6322	28.1014	ENSG00000035928.14	RFC1	chr4:39287455-39366375	MB468_CTRL	MB468_W2	OK	24.159	20.6382	-0.227243	-0.478775	0.36655	0.574087	no
ENSG00000036054.12	TBC1D23	10.1606	11.2362	12.5817	13.3147	6.17625	10.7652	ENSG00000036054.12	TBC1D23	chr3:100260999-100325251	MB468_CTRL	MB468_W2	OK	11.3262	10.0854	-0.167395	-0.376713	0.4453	0.646177	no
ENSG00000036257.12	CUL3	60.5809	67.0994	71.8068	42.9185	51.8061	46.6935	ENSG00000036257.12	CUL3	chr2:224464681-224585397	MB468_CTRL	MB468_W2	OK	66.4957	47.1394	-0.496328	-1.28658	0.02275	0.0805791	no
ENSG00000036448.9	MYOM2	0	0	0	0	0	0	ENSG00000036448.9	MYOM2	chr8:2045039-2165552	MB468_CTRL	MB468_W2	NOTEST	0	0	0	0	1	1	no
ENSG00000036473.6	OTC	0	0	0	0	0	0	ENSG00000036473.6	OTC	chrX:37349274-38688920	MB468_CTRL	MB468_W2	NOTEST	0	0	0	0	1	1	no
ENSG00000036530.8	CYP46A1	0	0.014463	0	0.0895546	0	0	ENSG00000036530.8	CYP46A1	chr14:99684303-99727301	MB468_CTRL	MB468_W2	NOTEST	0.00482101	0.0298515	2.6304	0	1	1	no
ENSG00000036549.12	ZZZ3	59.9884	51.2823	58.4762	56.1057	45.9038	50.7162	ENSG00000036549.12	ZZZ3	chr1:77562415-77683419	MB468_CTRL	MB468_W2	OK	56.5823	50.9085	-0.152444	-0.478643	0.3994	0.60426	no
ENSG00000036565.14	SLC18A1	0	0	0	0	0	0	ENSG00000036565.14	SLC18A1	chr8:20144854-20183206	MB468_CTRL	MB468_W2	NOTEST	0	0	0	0	1	1	no
ENSG00000036672.15	USP2	3.58783	3.62049	2.77371	3.09089	5.06195	3.94956	ENSG00000036672.15	USP2	chr11:119355214-119381726	MB468_CTRL	MB468_W2	OK	3.32734	4.03413	0.277888	0.365093	0.4044	0.608709	no
ENSG00000036828.14	CASR	0	0	0.0316633	0	0	0	ENSG00000036828.14	CASR	chr3:122184333-122286497	MB468_CTRL	MB468_W2	NOTEST	0.0105544	0	#NAME?	0	1	1	no
ENSG00000037042.8	TUBG2	2.79592	2.38151	3.15426	7.92086	12.3214	7.58285	ENSG00000037042.8	TUBG2	chr17:42659304-42667006	MB468_CTRL	MB468_W2	OK	2.77723	9.27503	1.73971	3.37393	5e-05	0.000470501	yes
ENSG00000037241.7	RPL26L1	54.5424	53.3243	49.1758	69.3274	142.498	92.0113	ENSG00000037241.7	RPL26L1	chr5:172954785-172969771	MB468_CTRL	MB468_W2	OK	52.3475	101.279	0.952142	3.25955	5e-05	0.000470501	yes
ENSG00000037280.15	FLT4	0	0	0	0	0	0	ENSG00000037280.15	FLT4	chr5:180601505-180649624	MB468_CTRL	MB468_W2	NOTEST	0	0	0	0	1	1	no
ENSG00000037474.14	NSUN2	66.8547	77.5957	69.8385	52.1602	58.4338	62.2529	ENSG00000037474.14	NSUN2	chr5:6599238-6633291	MB468_CTRL	MB468_W2	OK	71.4296	57.6157	-0.310062	-1.63383	0.00355	0.0182797	yes
ENSG00000037637.10	FBXO42	3.48438	3.4757	4.13105	2.49166	4.65975	4.45971	ENSG00000037637.10	FBXO42	chr1:16246838-16352454	MB468_CTRL	MB468_W2	OK	3.69704	3.87037	0.066102	0.135501	0.79205	0.893541	no
ENSG00000037749.11	MFAP3	14.7233	17.4524	21.4236	14.5219	21.0225	17.0855	ENSG00000037749.11	MFAP3	chr5:153990127-154445850	MB468_CTRL	MB468_W2	OK	17.8664	17.5433	-0.0263321	-0.0501731	0.91575	0.958836	no
ENSG00000037757.13	MRI1	26.1528	28.5951	29.3026	25.6727	33.4212	35.1776	ENSG00000037757.13	MRI1	chr19:13764531-13778462	MB468_CTRL	MB468_W2	OK	28.0168	31.4239	0.165565	0.443198	0.43215	0.634201	no
ENSG00000037897.16	METTL1	4.9699	6.81873	9.27522	4.04223	8.60384	6.80343	ENSG00000037897.16	METTL1	chr12:57762333-57818704	MB468_CTRL	MB468_W2	OK	7.02128	6.48317	-0.115035	-0.145324	0.75245	0.869719	no
ENSG00000037965.5	HOXC8	0.113967	0.44307	0.674306	0.979172	0.755771	1.65694	ENSG00000037965.5	HOXC8	chr12:53981508-54056030	MB468_CTRL	MB468_W2	NOTEST	0.410448	1.13063	1.46185	0	1	1	no
ENSG00000038002.8	AGA	15.7102	13.359	18.5024	8.79153	15.6672	7.53848	ENSG00000038002.8	AGA	chr4:177430769-177442503	MB468_CTRL	MB468_W2	OK	15.8572	10.6657	-0.572153	-0.909487	0.08165	0.209936	no
ENSG00000038210.12	PI4K2B	19.2741	19.0517	16.906	14.0678	10.8165	15.3435	ENSG00000038210.12	PI4K2B	chr4:25160640-25279092	MB468_CTRL	MB468_W2	OK	18.4106	13.4092	-0.457308	-2.29532	0.0001	0.000882755	yes
ENSG00000038219.12	BOD1L1	6.6083	8.59329	8.18195	9.39524	12.82	44.1498	ENSG00000038219.12	BOD1L1	chr4:13568737-13627723	MB468_CTRL	MB468_W2	OK	7.79452	22.1217	1.50493	3.61651	5e-05	0.000470501	yes
ENSG00000038274.16	MAT2B	67.1039	64.8442	66.0166	41.4947	74.6574	57.5235	ENSG00000038274.16	MAT2B	chr5:163503113-163519336	MB468_CTRL	MB468_W2	OK	65.9882	57.8919	-0.188848	-0.687487	0.2096	0.40133	no
ENSG00000038295.7	TLL1	0	0.0274312	0	0	0	0	ENSG00000038295.7	TLL1	chr4:165873257-166103895	MB468_CTRL	MB468_W2	NOTEST	0.00914373	0	#NAME?	0	1	1	no
ENSG00000038358.14	EDC4	19.8449	16.7726	12.9256	12.8424	18.4315	20.9765	ENSG00000038358.14	EDC4	chr16:67873022-67888855	MB468_CTRL	MB468_W2	OK	16.5144	17.4168	0.0767552	0.154417	0.76305	0.876279	no
ENSG00000038382.17	TRIO	26.5277	35.7333	31.2003	49.0429	56.7619	43.1138	ENSG00000038382.17	TRIO	chr5:14143701-14532128	MB468_CTRL	MB468_W2	OK	31.1538	49.6395	0.672083	1.39151	0.00925	0.0394176	yes
ENSG00000038427.15	VCAN	0	0	0	0	0	0	ENSG00000038427.15	VCAN	chr5:83471464-83582303	MB468_CTRL	MB468_W2	NOTEST	0	0	0	0	1	1	no
ENSG00000038532.14	CLEC16A	6.39406	5.15752	4.27186	4.26378	3.36452	6.62769	ENSG00000038532.14	CLEC16A	chr16:10944487-11182189	MB468_CTRL	MB468_W2	OK	5.27448	4.752	-0.150494	-0.207391	0.6039	0.769856	no
ENSG00000038945.14	MSR1	0	0	0	0	0	0	ENSG00000038945.14	MSR1	chr8:16107877-16567490	MB468_CTRL	MB468_W2	NOTEST	0	0	0	0	1	1	no
ENSG00000039068.18	CDH1	21.9436	28.6361	30.8449	29.727	28.3328	31.5965	ENSG00000039068.18	CDH1	chr16:68737224-68835548	MB468_CTRL	MB468_W2	OK	27.1415	29.8854	0.138942	0.377016	0.4626	0.660636	no
ENSG00000039123.15	SKIV2L2	18.266	17.8086	16.1849	15.1728	17.3882	10.3662	ENSG00000039123.15	SKIV2L2	chr5:55307759-55535050	MB468_CTRL	MB468_W2	OK	17.4198	14.3091	-0.283801	-0.560777	0.2652	0.46747	no
ENSG00000039139.9	DNAH5	2.75642	2.55363	3.60491	1.95855	0.505577	2.15097	ENSG00000039139.9	DNAH5	chr5:13690330-13944543	MB468_CTRL	MB468_W2	OK	2.97165	1.53837	-0.949866	-1.12498	0.01615	0.0616786	no
ENSG00000039319.16	ZFYVE16	16.8108	20.2818	16.3703	11.8336	14.0644	13.6826	ENSG00000039319.16	ZFYVE16	chr5:80408012-80479350	MB468_CTRL	MB468_W2	OK	17.8209	13.1935	-0.433745	-1.12195	0.026	0.0895043	no
ENSG00000039523.18	FAM65A	7.43455	13.162	9.38777	12.4462	14.2822	27.0735	ENSG00000039523.18	FAM65A	chr16:67517861-67546788	MB468_CTRL	MB468_W2	OK	9.99477	17.934	0.843449	1.52906	0.00045	0.00330662	yes
ENSG00000039537.13	C6	0	0	0	0	0	0	ENSG00000039537.13	C6	chr5:41142233-41261438	MB468_CTRL	MB468_W2	NOTEST	0	0	0	0	1	1	no
ENSG00000039560.13	RAI14	18.0091	21.1534	17.8471	16.3682	27.0386	19.7321	ENSG00000039560.13	RAI14	chr5:34656236-34832627	MB468_CTRL	MB468_W2	OK	19.0032	21.0463	0.147324	0.148854	0.70615	0.840237	no
ENSG00000039600.10	SOX30	0.127189	0	0.0942785	0	0	0	ENSG00000039600.10	SOX30	chr5:157625678-157671480	MB468_CTRL	MB468_W2	NOTEST	0.0738224	0	#NAME?	0	1	1	no
ENSG00000039650.10	PNKP	23.5046	26.4303	23.2808	53.5865	76.5945	63.1284	ENSG00000039650.10	PNKP	chr19:49818278-49888749	MB468_CTRL	MB468_W2	OK	24.4052	64.4365	1.40069	2.09557	0.0001	0.000882755	yes
ENSG00000039987.6	BEST2	0	0	0	0	0	0	ENSG00000039987.6	BEST2	chr19:12751701-12758458	MB468_CTRL	MB468_W2	NOTEST	0	0	0	0	1	1	no
ENSG00000040199.18	PHLPP2	6.29034	5.12959	4.92264	5.96559	5.96181	7.13698	ENSG00000040199.18	PHLPP2	chr16:71623707-71724701	MB468_CTRL	MB468_W2	OK	5.44752	6.35479	0.222245	0.409639	0.43615	0.637925	no
ENSG00000040275.16	SPDL1	30.6374	17.6932	34.3874	32.0707	32.6631	27.3956	ENSG00000040275.16	SPDL1	chr5:169583633-169604778	MB468_CTRL	MB468_W2	OK	27.5727	30.7098	0.155458	0.320883	0.52235	0.70832	no
ENSG00000040341.17	STAU2	27.7239	39.1026	25.6983	46.9736	47.7632	20.2201	ENSG00000040341.17	STAU2	chr8:73420003-73878910	MB468_CTRL	MB468_W2	OK	30.8416	38.319	0.313181	0.47286	0.3405	0.549103	no
ENSG00000040487.12	PQLC2	5.4522	6.37136	6.37422	6.58157	5.29111	8.05212	ENSG00000040487.12	PQLC2	chr1:19312325-19329300	MB468_CTRL	MB468_W2	OK	6.06593	6.6416	0.130803	0.282365	0.5946	0.762029	no
ENSG00000040531.14	CTNS	6.88152	2.84626	6.49306	6.76252	12.3413	9.29892	ENSG00000040531.14	CTNS	chr17:3636467-3661542	MB468_CTRL	MB468_W2	OK	5.40695	9.46759	0.808182	0.798406	0.05	0.146843	no
ENSG00000040608.13	RTN4R	19.2483	15.8885	14.5596	6.62043	21.7489	13.4055	ENSG00000040608.13	RTN4R	chr22:20241414-20283246	MB468_CTRL	MB468_W2	OK	16.5655	13.925	-0.250508	-0.668608	0.2111	0.403065	no
ENSG00000040633.12	PHF23	14.7623	10.8975	15.4527	16.1406	20.4598	15.3822	ENSG00000040633.12	PHF23	chr17:7235027-7239722	MB468_CTRL	MB468_W2	OK	13.7042	17.3275	0.338451	0.756905	0.13185	0.293648	no
ENSG00000040731.10	CDH10	0	0	0	0	0	0	ENSG00000040731.10	CDH10	chr5:24487099-24644978	MB468_CTRL	MB468_W2	NOTEST	0	0	0	0	1	1	no
ENSG00000040933.15	INPP4A	11.4509	5.39134	5.54126	6.46289	6.23052	4.8016	ENSG00000040933.15	INPP4A	chr2:98444853-98594390	MB468_CTRL	MB468_W2	OK	7.46118	5.83167	-0.355494	-0.508209	0.3027	0.509837	no
ENSG00000041353.9	RAB27B	12.6397	14.4972	13.1215	9.44167	8.63192	7.26623	ENSG00000041353.9	RAB27B	chr18:54717859-54898083	MB468_CTRL	MB468_W2	OK	13.4195	8.44661	-0.667884	-2.11694	5e-05	0.000470501	yes
ENSG00000041357.15	PSMA4	101.165	108.83	102.247	77.3247	104.505	91.3569	ENSG00000041357.15	PSMA4	chr15:78540404-78552419	MB468_CTRL	MB468_W2	OK	104.081	91.0623	-0.192779	-0.807466	0.14725	0.316503	no
ENSG00000041515.15	MYO16	0.123583	0	0	0.0652982	0	0	ENSG00000041515.15	MYO16	chr13:108596151-109208007	MB468_CTRL	MB468_W2	NOTEST	0.0411944	0.0217661	-0.92037	0	1	1	no
ENSG00000041802.10	LSG1	23.2926	15.4775	15.9775	14.6743	30.2576	24.9424	ENSG00000041802.10	LSG1	chr3:194584010-194672477	MB468_CTRL	MB468_W2	OK	18.2492	23.2914	0.351964	0.507248	0.36705	0.574527	no
ENSG00000041880.14	PARP3	2.76974	1.82618	1.5494	2.40151	3.43929	2.37885	ENSG00000041880.14	PARP3	chr3:51942344-51948867	MB468_CTRL	MB468_W2	OK	2.04844	2.73988	0.419588	0.49478	0.19605	0.383847	no
ENSG00000041982.15	TNC	8.46269	11.3086	12.4141	11.8934	13.1927	9.53591	ENSG00000041982.15	TNC	chr9:115019577-115118257	MB468_CTRL	MB468_W2	OK	10.7285	11.5406	0.10528	0.110031	0.79015	0.892413	no
ENSG00000041988.15	THAP3	2.13804	3.90992	4.15842	4.08762	17.3949	9.77672	ENSG00000041988.15	THAP3	chr1:6624865-6701924	MB468_CTRL	MB468_W2	OK	3.40212	10.4198	1.61481	1.86978	0.00015	0.00126619	yes
ENSG00000042062.11	FAM65C	0.0619571	0.428776	0.130198	0.305014	0	0	ENSG00000042062.11	FAM65C	chr20:50586107-50691528	MB468_CTRL	MB468_W2	NOTEST	0.206977	0.101671	-1.02556	0	1	1	no
ENSG00000042088.13	TDP1	14.1525	18.7303	17.0543	16.2208	27.8396	15.1218	ENSG00000042088.13	TDP1	chr14:89954938-90044768	MB468_CTRL	MB468_W2	OK	16.6457	19.7274	0.245052	0.633166	0.2282	0.424352	no
ENSG00000042286.14	AIFM2	4.40026	5.29784	3.69228	4.12921	6.50173	3.82745	ENSG00000042286.14	AIFM2	chr10:70052795-70132934	MB468_CTRL	MB468_W2	OK	4.46346	4.81946	0.11071	0.236419	0.67735	0.821299	no
ENSG00000042304.10	C2orf83	0	0	0	0	0	0	ENSG00000042304.10	C2orf83	chr2:227610089-227648606	MB468_CTRL	MB468_W2	NOTEST	0	0	0	0	1	1	no
ENSG00000042317.16	SPATA7	0.713333	0.414345	0.651247	1.85998	7.82171	3.42364	ENSG00000042317.16	SPATA7	chr14:88384923-88554733	MB468_CTRL	MB468_W2	OK	0.592975	4.36844	2.88108	0.633945	5e-05	0.000470501	yes
ENSG00000042429.10	MED17	17.4857	12.0125	19.0913	28.0358	17.8306	13.0067	ENSG00000042429.10	MED17	chr11:93661638-93814695	MB468_CTRL	MB468_W2	OK	16.1965	19.6244	0.276965	0.307672	0.59485	0.762243	no
ENSG00000042445.13	RETSAT	16.5109	15.8416	15.7004	14.3413	13.1586	13.6586	ENSG00000042445.13	RETSAT	chr2:85342087-85391752	MB468_CTRL	MB468_W2	OK	16.0176	13.7195	-0.223429	-0.684882	0.1929	0.380137	no
ENSG00000042493.15	CAPG	56.5085	50.8689	53.7102	23.5041	18.7462	45.1023	ENSG00000042493.15	CAPG	chr2:85394747-85418432	MB468_CTRL	MB468_W2	OK	53.6959	29.1175	-0.882923	-2.02404	0.0013	0.00802013	yes
ENSG00000042753.11	AP2S1	94.1039	105.311	115.351	63.7498	79.2503	77.9565	ENSG00000042753.11	AP2S1	chr19:46838135-46850992	MB468_CTRL	MB468_W2	OK	104.922	73.6522	-0.510518	-2.3759	5e-05	0.000470501	yes
ENSG00000042781.12	USH2A	0	0	0	0	0	0	ENSG00000042781.12	USH2A	chr1:215622893-216423396	MB468_CTRL	MB468_W2	NOTEST	0	0	0	0	1	1	no
ENSG00000042832.11	TG	0	0	0	0	0	1.14196	ENSG00000042832.11	TG	chr8:132866957-133134903	MB468_CTRL	MB468_W2	NOTEST	0	0.380653	inf	0	1	1	no
ENSG00000042980.12	ADAM28	0	0.139404	0.896093	1.80793	2.85081	0.430864	ENSG00000042980.12	ADAM28	chr8:24294039-24912073	MB468_CTRL	MB468_W2	NOTEST	0.345166	1.69653	2.29723	0	1	1	no
ENSG00000043039.6	BARX2	27.4725	29.233	30.1843	11.0587	16.3418	21.0698	ENSG00000043039.6	BARX2	chr11:129375939-129452279	MB468_CTRL	MB468_W2	OK	28.9633	16.1568	-0.842084	-4.82404	5e-05	0.000470501	yes
ENSG00000043093.13	DCUN1D1	13.2196	12.285	13.4278	11.2664	12.4769	11.7894	ENSG00000043093.13	DCUN1D1	chr3:182938073-182985953	MB468_CTRL	MB468_W2	OK	12.9775	11.8442	-0.131828	-0.402116	0.38765	0.59349	no
ENSG00000043143.20	JADE2	16.7736	17.8596	24.2541	15.4529	19.3274	27.7985	ENSG00000043143.20	JADE2	chr5:134524311-134583230	MB468_CTRL	MB468_W2	OK	19.6291	20.8596	0.0877154	0.189554	0.7412	0.863003	no
ENSG00000043355.11	ZIC2	5.08081	5.394	5.24883	7.87124	10.329	7.22861	ENSG00000043355.11	ZIC2	chr13:99981771-99986773	MB468_CTRL	MB468_W2	OK	5.24121	8.47629	0.693533	0.977925	0.02265	0.0802715	no
ENSG00000043462.11	LCP2	0	0	0	0	0	0	ENSG00000043462.11	LCP2	chr5:170232446-170298227	MB468_CTRL	MB468_W2	NOTEST	0	0	0	0	1	1	no
ENSG00000043514.15	TRIT1	22.9115	23.7731	26.4191	21.7054	34.5955	26.8406	ENSG00000043514.15	TRIT1	chr1:39841021-39883511	MB468_CTRL	MB468_W2	OK	24.3679	27.7138	0.185626	0.667487	0.20835	0.399772	no
ENSG00000043591.5	ADRB1	3.77669	5.15999	3.04495	3.73328	3.15508	4.37463	ENSG00000043591.5	ADRB1	chr10:114044055-114046908	MB468_CTRL	MB468_W2	OK	3.99388	3.75433	-0.0892355	-0.234837	0.68465	0.826215	no
ENSG00000044090.8	CUL7	4.2919	5.06912	5.58382	4.70175	4.81884	5.71206	ENSG00000044090.8	CUL7	chr6:43037616-43075099	MB468_CTRL	MB468_W2	OK	4.98161	5.07755	0.0275188	0.0751063	0.8849	0.944388	no
ENSG00000044115.20	CTNNA1	31.5119	27.9811	32.0922	24.4531	47.5373	23.4319	ENSG00000044115.20	CTNNA1	chr5:138610966-138935034	MB468_CTRL	MB468_W2	OK	30.5284	31.8074	0.0592101	0.110974	0.80175	0.898866	no
ENSG00000044446.11	PHKA2	12.0025	12.5905	11.2545	19.4459	24.2365	19.8648	ENSG00000044446.11	PHKA2	chrX:18890295-18984598	MB468_CTRL	MB468_W2	OK	11.9492	21.1824	0.825956	1.97882	0.0001	0.000882755	yes
ENSG00000044459.14	CNTLN	2.87626	3.81461	4.34693	1.73563	2.07914	2.04492	ENSG00000044459.14	CNTLN	chr9:17134981-17503923	MB468_CTRL	MB468_W2	OK	3.67927	1.95323	-0.913557	-1.66234	0.0006	0.00420723	yes
ENSG00000044524.10	EPHA3	0	0	0	0	0	0	ENSG00000044524.10	EPHA3	chr3:89107523-89482134	MB468_CTRL	MB468_W2	NOTEST	0	0	0	0	1	1	no
ENSG00000044574.7	HSPA5	66.743	71.6944	79.4884	40.9632	34.3041	44.5912	ENSG00000044574.7	HSPA5	chr9:125234852-125241330	MB468_CTRL	MB468_W2	OK	72.6419	39.9529	-0.862504	-5.69814	5e-05	0.000470501	yes
ENSG00000046604.12	DSG2	21.9728	20.4956	23.4102	10.7132	10.6927	10.871	ENSG00000046604.12	DSG2	chr18:31498042-31556911	MB468_CTRL	MB468_W2	OK	21.9596	10.759	-1.02931	-6.49132	5e-05	0.000470501	yes
ENSG00000046647.13	GEMIN8	5.86014	8.85432	6.74083	14.0392	6.21516	6.17804	ENSG00000046647.13	GEMIN8	chrX:14008278-14029893	MB468_CTRL	MB468_W2	OK	7.15176	8.81081	0.300976	0.449813	0.41875	0.622385	no
ENSG00000046651.14	OFD1	4.97578	8.71167	6.79194	9.30638	10.1702	13.3382	ENSG00000046651.14	OFD1	chrX:13734744-13769353	MB468_CTRL	MB468_W2	OK	6.82646	10.9383	0.680174	1.50106	0.0042	0.0209155	yes
ENSG00000046653.14	GPM6B	0	0.269617	0	0	0	0.81131	ENSG00000046653.14	GPM6B	chrX:13771030-13938638	MB468_CTRL	MB468_W2	NOTEST	0.0898722	0.270437	1.58934	0	1	1	no
ENSG00000046774.9	MAGEC2	0	0.0777877	0	0	0	0	ENSG00000046774.9	MAGEC2	chrX:142202344-142205290	MB468_CTRL	MB468_W2	NOTEST	0.0259292	0	#NAME?	0	1	1	no
ENSG00000046889.18	PREX2	0	0	0	0	0.125712	0	ENSG00000046889.18	PREX2	chr8:67952117-68237030	MB468_CTRL	MB468_W2	NOTEST	0	0.041904	inf	0	1	1	no
ENSG00000047056.14	WDR37	6.71321	6.19662	5.35898	5.16489	6.80292	8.28297	ENSG00000047056.14	WDR37	chr10:1049537-1132297	MB468_CTRL	MB468_W2	OK	6.08961	6.75026	0.148594	0.342184	0.50465	0.694806	no
ENSG00000047188.15	YTHDC2	11.753	11.2485	11.52	7.3806	14.114	13.4993	ENSG00000047188.15	YTHDC2	chr5:113513682-113595285	MB468_CTRL	MB468_W2	OK	11.5072	11.6646	0.0196099	0.0442949	0.926	0.963759	no
ENSG00000047230.14	CTPS2	7.81032	7.81473	9.06238	4.90877	4.87517	7.34029	ENSG00000047230.14	CTPS2	chrX:16588002-16712936	MB468_CTRL	MB468_W2	OK	8.22914	5.70808	-0.527737	-1.39026	0.0041	0.0205067	yes
ENSG00000047249.16	ATP6V1H	15.1035	14.471	20.98	15.901	14.953	12.5466	ENSG00000047249.16	ATP6V1H	chr8:53715556-53843558	MB468_CTRL	MB468_W2	OK	16.8515	14.4669	-0.220121	-0.324337	0.4003	0.604973	no
ENSG00000047315.14	POLR2B	28.7803	47.5169	32.0231	35.5139	41.9393	33.1426	ENSG00000047315.14	POLR2B	chr4:56963369-57205510	MB468_CTRL	MB468_W2	OK	36.1068	36.8653	0.0299929	0.0594415	0.91605	0.958929	no
ENSG00000047346.12	FAM214A	9.05529	9.53917	9.56806	11.9408	7.62496	8.28458	ENSG00000047346.12	FAM214A	chr15:52577841-52709817	MB468_CTRL	MB468_W2	OK	9.38751	9.28345	-0.0160808	-0.0300688	0.9477	0.974768	no
ENSG00000047365.11	ARAP2	5.9605	6.31898	7.33596	4.99912	4.50898	7.06917	ENSG00000047365.11	ARAP2	chr4:35948220-36274220	MB468_CTRL	MB468_W2	OK	6.53848	5.52576	-0.242783	-0.269988	0.4972	0.688818	no
ENSG00000047410.13	TPR	64.4228	68.2846	74.5128	55.3607	56.3224	61.9489	ENSG00000047410.13	TPR	chr1:186296278-186375693	MB468_CTRL	MB468_W2	OK	69.0734	57.8773	-0.255131	-0.3864	0.4962	0.68784	no
ENSG00000047457.13	CP	2.90292	3.24956	3.27146	5.91391	10.4113	7.81682	ENSG00000047457.13	CP	chr3:149129583-149222055	MB468_CTRL	MB468_W2	OK	3.14131	8.04735	1.35715	1.61218	0.0003	0.00233849	yes
ENSG00000047578.12	KIAA0556	3.38219	3.68925	3.32616	4.42679	11.6949	5.67346	ENSG00000047578.12	KIAA0556	chr16:27550132-27780369	MB468_CTRL	MB468_W2	OK	3.46587	7.26506	1.06776	0.996769	0.018	0.0669987	no
ENSG00000047579.19	DTNBP1	18.4131	21.1562	22.0665	14.1271	15.2349	17.7426	ENSG00000047579.19	DTNBP1	chr6:15522800-15663058	MB468_CTRL	MB468_W2	OK	20.5453	15.7015	-0.387903	-1.60053	0.0052	0.0248423	yes
ENSG00000047597.5	XK	0.853522	1.02537	1.40927	0.721326	0.68624	0.676983	ENSG00000047597.5	XK	chrX:37349274-38688920	MB468_CTRL	MB468_W2	NOTEST	1.09606	0.69485	-0.657549	0	1	1	no
ENSG00000047617.14	ANO2	0	0	0	0	0	0	ENSG00000047617.14	ANO2	chr12:5531868-5946232	MB468_CTRL	MB468_W2	NOTEST	0	0	0	0	1	1	no
ENSG00000047621.11	C12orf4	4.77614	4.59767	7.13243	4.08223	6.08092	5.33509	ENSG00000047621.11	C12orf4	chr12:4487727-4538508	MB468_CTRL	MB468_W2	OK	5.50208	5.16608	-0.0909082	-0.0911854	0.832	0.915695	no
ENSG00000047634.14	SCML1	4.53342	5.30477	5.65088	12.9031	12.5342	10.9721	ENSG00000047634.14	SCML1	chrX:17737448-17754988	MB468_CTRL	MB468_W2	OK	5.16302	12.1364	1.23306	3.43903	5e-05	0.000470501	yes
ENSG00000047644.18	WWC3	16.2079	15.8772	16.9465	9.68413	10.4911	10.1517	ENSG00000047644.18	WWC3	chrX:10015561-10144478	MB468_CTRL	MB468_W2	OK	16.3439	10.109	-0.69311	-2.58246	5e-05	0.000470501	yes
ENSG00000047648.21	ARHGAP6	0.320131	0.099238	0.259799	0.538559	0.757684	0.143631	ENSG00000047648.21	ARHGAP6	chrX:11137542-11665701	MB468_CTRL	MB468_W2	NOTEST	0.226389	0.479958	1.0841	0	1	1	no
ENSG00000047662.4	FAM184B	0	0	0	0.035672	0	0	ENSG00000047662.4	FAM184B	chr4:17614630-17781512	MB468_CTRL	MB468_W2	NOTEST	0	0.0118907	inf	0	1	1	no
ENSG00000047849.21	MAP4	25.1878	28.5377	29.9082	23.2743	29.0263	24.0297	ENSG00000047849.21	MAP4	chr3:47850689-48089272	MB468_CTRL	MB468_W2	OK	27.8779	25.4434	-0.131828	-0.42501	0.36945	0.576732	no
ENSG00000047932.13	GOPC	24.3205	24.1827	24.7359	16.9539	16.4253	18.2614	ENSG00000047932.13	GOPC	chr6:117288299-117602542	MB468_CTRL	MB468_W2	OK	24.413	17.2135	-0.504108	-2.57095	5e-05	0.000470501	yes
ENSG00000047936.10	ROS1	0.61377	0.587115	0.909235	1.17582	0.80693	0.300213	ENSG00000047936.10	ROS1	chr6:117288299-117602542	MB468_CTRL	MB468_W2	NOTEST	0.703373	0.760988	0.113584	0	1	1	no
ENSG00000048028.11	USP28	27.8637	30.3635	40.2479	29.1637	39.7547	28.2319	ENSG00000048028.11	USP28	chr11:113797873-113875570	MB468_CTRL	MB468_W2	OK	32.825	32.3834	-0.01954	-0.0527682	0.9236	0.962793	no
ENSG00000048052.21	HDAC9	13.9453	16.3414	11.3333	11.8766	9.10472	7.4306	ENSG00000048052.21	HDAC9	chr7:18086948-19002416	MB468_CTRL	MB468_W2	OK	13.8733	9.47065	-0.55078	-1.11272	0.00975	0.0411939	yes
ENSG00000048140.17	TSPAN17	34.5029	30.3926	30.5491	28.5195	37.3126	33.9322	ENSG00000048140.17	TSPAN17	chr5:176647386-176659054	MB468_CTRL	MB468_W2	OK	31.8149	33.2548	0.0638585	0.28032	0.5983	0.765326	no
ENSG00000048162.20	NOP16	43.7093	48.4304	49.1404	41.6388	56.3866	52.3684	ENSG00000048162.20	NOP16	chr5:176365467-176416569	MB468_CTRL	MB468_W2	OK	47.0934	50.1313	0.0901864	0.300495	0.5855	0.755998	no
ENSG00000048342.15	CC2D2A	0.441484	0.578226	0.56065	0.0678793	5.3051	3.64194	ENSG00000048342.15	CC2D2A	chr4:15469864-15601557	MB468_CTRL	MB468_W2	NOTEST	0.526787	3.00497	2.51206	0	1	1	no
ENSG00000048392.11	RRM2B	10.3742	13.7076	12.461	6.94555	9.61055	15.4631	ENSG00000048392.11	RRM2B	chr8:102204501-102239118	MB468_CTRL	MB468_W2	OK	12.1809	10.6731	-0.190648	-0.258411	0.538	0.720557	no
ENSG00000048405.9	ZNF800	16.2166	17.4488	16.3061	16.886	18.5005	22.134	ENSG00000048405.9	ZNF800	chr7:127346789-127431924	MB468_CTRL	MB468_W2	OK	16.6572	19.1735	0.202969	0.585944	0.26295	0.464756	no
ENSG00000048462.10	TNFRSF17	0	0	0	0	0	0	ENSG00000048462.10	TNFRSF17	chr16:11927372-11976643	MB468_CTRL	MB468_W2	NOTEST	0	0	0	0	1	1	no
ENSG00000048471.13	SNX29	1.56508	1.32637	2.10899	2.283	2.3985	1.46595	ENSG00000048471.13	SNX29	chr16:11976736-12611044	MB468_CTRL	MB468_W2	NOTEST	1.66681	2.04915	0.297933	0	1	1	no
ENSG00000048540.14	LMO3	0.111226	0	0	0	0	0	ENSG00000048540.14	LMO3	chr12:16347141-16610594	MB468_CTRL	MB468_W2	NOTEST	0.0370753	0	#NAME?	0	1	1	no
ENSG00000048544.5	MRPS10	25.716	28.8084	30.4694	22.5116	25.6076	28.7185	ENSG00000048544.5	MRPS10	chr6:42206800-42217865	MB468_CTRL	MB468_W2	OK	28.3312	25.6126	-0.145542	-0.827722	0.1436	0.311323	no
ENSG00000048649.13	RSF1	36.0541	38.5203	33.7959	40.7471	52.2962	47.816	ENSG00000048649.13	RSF1	chr11:77659995-77821017	MB468_CTRL	MB468_W2	OK	36.1234	46.9531	0.378286	0.839723	0.15285	0.32475	no
ENSG00000048707.13	VPS13D	3.14938	3.88731	4.77765	4.43732	4.24403	3.1674	ENSG00000048707.13	VPS13D	chr1:12230066-12512047	MB468_CTRL	MB468_W2	OK	3.93811	3.94958	0.00419668	0.0040802	0.991	0.995427	no
ENSG00000048740.18	CELF2	0.112502	0.13876	0.105791	0.326342	0	0	ENSG00000048740.18	CELF2	chr10:10798396-11336675	MB468_CTRL	MB468_W2	NOTEST	0.119018	0.108781	-0.129752	0	1	1	no
ENSG00000048828.16	FAM120A	48.7044	53.5605	54.0849	38.6682	35.0726	38.1861	ENSG00000048828.16	FAM120A	chr9:93446493-93566107	MB468_CTRL	MB468_W2	OK	52.1166	37.309	-0.482219	-2.22963	0.00025	0.0019885	yes
ENSG00000048991.16	R3HDM1	60.686	63.4417	45.9293	30.8482	23.9444	23.9258	ENSG00000048991.16	R3HDM1	chr2:135531454-135725270	MB468_CTRL	MB468_W2	OK	56.6857	26.2395	-1.11125	-2.77256	5e-05	0.000470501	yes
ENSG00000049089.13	COL9A2	4.97664	4.66745	2.64135	3.11694	2.47686	3.2681	ENSG00000049089.13	COL9A2	chr1:40300486-40317816	MB468_CTRL	MB468_W2	OK	4.09515	2.95396	-0.471263	-0.447131	0.19815	0.386555	no
ENSG00000049130.13	KITLG	37.3527	39.6405	56.6135	26.1346	24.0542	33.027	ENSG00000049130.13	KITLG	chr12:88492792-88598218	MB468_CTRL	MB468_W2	OK	44.5356	27.7386	-0.683063	-2.64906	5e-05	0.000470501	yes
ENSG00000049167.13	ERCC8	8.76749	9.80544	8.94433	12.0799	11.1549	6.84286	ENSG00000049167.13	ERCC8	chr5:60873830-60945073	MB468_CTRL	MB468_W2	OK	9.17242	10.0259	0.128357	0.263321	0.619	0.78128	no
ENSG00000049192.14	ADAMTS6	0	0	0	0.358927	0.0851152	0	ENSG00000049192.14	ADAMTS6	chr5:65148735-65481920	MB468_CTRL	MB468_W2	NOTEST	0	0.148014	inf	0	1	1	no
ENSG00000049239.12	H6PD	4.1374	5.44989	4.81007	5.13931	7.0912	5.08106	ENSG00000049239.12	H6PD	chr1:9234774-9271337	MB468_CTRL	MB468_W2	OK	4.79912	5.77052	0.265932	1.00224	0.0823	0.211178	no
ENSG00000049245.12	VAMP3	26.8243	32.7949	30.3768	30.7463	23.9277	26.3873	ENSG00000049245.12	VAMP3	chr1:7771268-7781432	MB468_CTRL	MB468_W2	OK	29.9987	27.0204	-0.150847	-0.243957	0.53845	0.720818	no
ENSG00000049246.14	PER3	20.3796	22.3593	19.5609	14.8515	16.3406	15.969	ENSG00000049246.14	PER3	chr1:7784319-7853512	MB468_CTRL	MB468_W2	OK	20.7666	15.7204	-0.401628	-1.44223	0.00655	0.0299788	yes
ENSG00000049247.13	UTS2	0	0	0	0	0	0	ENSG00000049247.13	UTS2	chr1:7784319-7853512	MB468_CTRL	MB468_W2	NOTEST	0	0	0	0	1	1	no
ENSG00000049249.8	TNFRSF9	0.0732436	0	0.035947	0.178247	0	0.19598	ENSG00000049249.8	TNFRSF9	chr1:7915893-7943165	MB468_CTRL	MB468_W2	NOTEST	0.0363969	0.124742	1.77707	0	1	1	no
ENSG00000049283.17	EPN3	9.00257	13.6793	12.2286	22.1363	25.0767	15.0239	ENSG00000049283.17	EPN3	chr17:50532542-50555852	MB468_CTRL	MB468_W2	OK	11.6368	20.7456	0.834111	1.30111	0.0044	0.0217197	yes
ENSG00000049323.15	LTBP1	5.41772	7.54411	7.15586	3.5789	1.74814	2.34415	ENSG00000049323.15	LTBP1	chr2:32946971-33399509	MB468_CTRL	MB468_W2	OK	6.7059	2.55706	-1.39094	-1.37691	0.00045	0.00330662	yes
ENSG00000049449.8	RCN1	106.555	107.325	119.783	82.7573	85.462	93.874	ENSG00000049449.8	RCN1	chr11:31784791-32105755	MB468_CTRL	MB468_W2	OK	111.221	87.3644	-0.348313	-2.09073	0.0001	0.000882755	yes
ENSG00000049540.16	ELN	0	0.103146	0.292613	0	0	1.15702	ENSG00000049540.16	ELN	chr7:74027788-74069907	MB468_CTRL	MB468_W2	NOTEST	0.131919	0.385675	1.54773	0	1	1	no
ENSG00000049541.10	RFC2	23.1	29.5311	29.7745	16.6703	16.4897	14.9169	ENSG00000049541.10	RFC2	chr7:74231498-74254458	MB468_CTRL	MB468_W2	OK	27.4685	16.0256	-0.777399	-2.78315	5e-05	0.000470501	yes
ENSG00000049618.22	ARID1B	20.5921	26.2932	23.0828	24.4115	48.5189	25.9975	ENSG00000049618.22	ARID1B	chr6:156776359-157210779	MB468_CTRL	MB468_W2	OK	23.3227	32.976	0.499681	0.731755	0.1556	0.32882	no
ENSG00000049656.13	CLPTM1L	113.686	120.056	125.046	92.7258	99.7285	101.013	ENSG00000049656.13	CLPTM1L	chr5:1317743-1345099	MB468_CTRL	MB468_W2	OK	119.596	97.8223	-0.289933	-1.17549	0.03765	0.118797	no
ENSG00000049759.17	NEDD4L	60.4544	44.3321	26.4939	24.4234	26.4289	14.3192	ENSG00000049759.17	NEDD4L	chr18:58044366-58401540	MB468_CTRL	MB468_W2	OK	43.7601	21.7238	-1.01034	-1.57247	0.0009	0.00591691	yes
ENSG00000049768.14	FOXP3	0	0.186373	0.366633	0	0	0	ENSG00000049768.14	FOXP3	chrX:49235466-49264826	MB468_CTRL	MB468_W2	NOTEST	0.184335	0	#NAME?	0	1	1	no
ENSG00000049769.12	PPP1R3F	5.73379	4.76967	3.76958	4.83657	5.32496	3.359	ENSG00000049769.12	PPP1R3F	chrX:49269842-49301461	MB468_CTRL	MB468_W2	OK	4.75768	4.50684	-0.078141	-0.113918	0.83885	0.919506	no
ENSG00000049860.13	HEXB	25.9608	30.3355	30.6872	29.2268	26.7372	31.618	ENSG00000049860.13	HEXB	chr5:74627405-74867854	MB468_CTRL	MB468_W2	OK	28.9945	29.194	0.00989197	0.0175291	0.9719	0.986726	no
ENSG00000049883.14	PTCD2	1.52292	1.77718	1.88813	2.64114	4.42415	4.43192	ENSG00000049883.14	PTCD2	chr5:72219408-72368395	MB468_CTRL	MB468_W2	OK	1.72941	3.83241	1.14797	1.03876	0.00785	0.0346148	yes
ENSG00000050030.13	KIAA2022	0	0	0.0153609	0	0	0	ENSG00000050030.13	KIAA2022	chrX:74732848-74925485	MB468_CTRL	MB468_W2	NOTEST	0.00512029	0	#NAME?	0	1	1	no
ENSG00000050130.17	JKAMP	29.2509	37.3178	33.2729	50.0042	43.0708	34.6675	ENSG00000050130.17	JKAMP	chr14:59429021-59576831	MB468_CTRL	MB468_W2	OK	33.2805	42.5809	0.355527	1.10976	0.0435	0.132411	no
ENSG00000050165.17	DKK3	0	0.122038	0	0	0	0	ENSG00000050165.17	DKK3	chr11:11963105-12009769	MB468_CTRL	MB468_W2	NOTEST	0.0406795	0	#NAME?	0	1	1	no
ENSG00000050327.14	ARHGEF5	3.50634	5.7754	4.59393	2.4502	4.45913	3.32354	ENSG00000050327.14	ARHGEF5	chr7:144186082-144380632	MB468_CTRL	MB468_W2	OK	4.62523	3.41095	-0.439348	-1.22723	0.02535	0.0877944	no
ENSG00000050344.8	NFE2L3	21.3575	19.3019	22.0208	20.0217	10.83	16.4149	ENSG00000050344.8	NFE2L3	chr7:26152239-26187125	MB468_CTRL	MB468_W2	OK	20.8934	15.7555	-0.40719	-1.41184	0.01075	0.0446368	yes
ENSG00000050393.11	MCUR1	41.8758	38.9057	41.8661	28.4376	30.9144	26.4385	ENSG00000050393.11	MCUR1	chr6:13786556-13814568	MB468_CTRL	MB468_W2	OK	40.8825	28.5968	-0.515629	-2.39802	5e-05	0.000470501	yes
ENSG00000050405.13	LIMA1	47.0274	48.5501	45.6808	37.1826	43.4968	31.8306	ENSG00000050405.13	LIMA1	chr12:50175787-50283546	MB468_CTRL	MB468_W2	OK	47.0861	37.5034	-0.328282	-1.08542	0.0475	0.141439	no
ENSG00000050426.15	LETMD1	15.4904	14.8959	13.5908	28.8313	51.5886	34.9974	ENSG00000050426.15	LETMD1	chr12:51047961-51060424	MB468_CTRL	MB468_W2	OK	14.659	38.4724	1.39203	2.57553	5e-05	0.000470501	yes
ENSG00000050438.16	SLC4A8	2.21654	2.16056	1.11637	0.844838	0.970567	0.546989	ENSG00000050438.16	SLC4A8	chr12:51351246-51515763	MB468_CTRL	MB468_W2	NOTEST	1.83116	0.787464	-1.21747	0	1	1	no
ENSG00000050555.17	LAMC3	0.0309475	0	0.157216	0.0735367	0.111989	0	ENSG00000050555.17	LAMC3	chr9:131009081-131094473	MB468_CTRL	MB468_W2	NOTEST	0.062721	0.0618419	-0.0203657	0	1	1	no
ENSG00000050628.20	PTGER3	0.112613	0.458934	0.427318	0.611952	0.708224	0.27619	ENSG00000050628.20	PTGER3	chr1:70852352-71047808	MB468_CTRL	MB468_W2	NOTEST	0.332955	0.532122	0.67643	0	1	1	no
ENSG00000050730.15	TNIP3	0	0	0	0	0	0	ENSG00000050730.15	TNIP3	chr4:121131407-121227466	MB468_CTRL	MB468_W2	NOTEST	0	0	0	0	1	1	no
ENSG00000050748.17	MAPK9	71.0066	72.012	74.5827	58.9157	63.1991	76.5555	ENSG00000050748.17	MAPK9	chr5:180233142-180292099	MB468_CTRL	MB468_W2	OK	72.5338	66.2234	-0.131312	-0.496926	0.3844	0.590537	no
ENSG00000050767.15	COL23A1	0.0359661	0.170513	0	0.410798	0	0.133978	ENSG00000050767.15	COL23A1	chr5:178237617-178590555	MB468_CTRL	MB468_W2	NOTEST	0.0688263	0.181592	1.39967	0	1	1	no
ENSG00000050820.16	BCAR1	80.4089	59.8823	61.9491	56.323	67.4562	80.1128	ENSG00000050820.16	BCAR1	chr16:75226073-75268053	MB468_CTRL	MB468_W2	OK	67.4135	67.964	0.0117345	0.0393469	0.94485	0.973482	no
ENSG00000051009.10	FAM160A2	9.39365	8.28936	8.36988	15.1273	14.9471	13.1976	ENSG00000051009.10	FAM160A2	chr11:6211334-6234711	MB468_CTRL	MB468_W2	OK	8.6843	14.424	0.731991	1.59439	0.00435	0.0215222	yes
ENSG00000051108.14	HERPUD1	22.5775	25.1505	21.8875	45.4255	46.3798	46.8684	ENSG00000051108.14	HERPUD1	chr16:56932047-56944863	MB468_CTRL	MB468_W2	OK	23.2052	46.2246	0.994212	2.80908	5e-05	0.000470501	yes
ENSG00000051128.18	HOMER3	119.266	140.956	135.293	75.1326	107.022	106.637	ENSG00000051128.18	HOMER3	chr19:18899513-18946831	MB468_CTRL	MB468_W2	OK	131.839	96.2638	-0.453708	-1.80169	0.00225	0.0125789	yes
ENSG00000051180.16	RAD51	12.0237	10.8674	12.4022	5.63568	10.748	10.5959	ENSG00000051180.16	RAD51	chr15:40686723-40732339	MB468_CTRL	MB468_W2	OK	11.7645	8.99319	-0.387531	-0.786825	0.11505	0.267412	no
ENSG00000051341.13	POLQ	4.85853	4.5434	5.92395	7.5998	9.10271	6.88287	ENSG00000051341.13	POLQ	chr3:121431426-121546641	MB468_CTRL	MB468_W2	OK	5.10862	7.86179	0.621924	1.56492	0.00495	0.0238689	yes
ENSG00000051382.8	PIK3CB	29.8016	32.1618	25.9939	29.835	33.5562	30.5705	ENSG00000051382.8	PIK3CB	chr3:138652698-138834938	MB468_CTRL	MB468_W2	OK	29.3191	31.3206	0.0952707	0.2511	0.64615	0.800145	no
ENSG00000051523.10	CYBA	207.272	217.105	223.29	165.971	208.761	214.575	ENSG00000051523.10	CYBA	chr16:88643282-88651152	MB468_CTRL	MB468_W2	OK	215.889	196.436	-0.136233	-0.863731	0.1208	0.276636	no
ENSG00000051596.9	THOC3	16.1482	18.5084	22.6416	6.35896	19.6108	13.3981	ENSG00000051596.9	THOC3	chr5:175906938-176034680	MB468_CTRL	MB468_W2	OK	19.0994	13.1226	-0.541472	-1.32798	0.00895	0.0384116	yes
ENSG00000051620.10	HEBP2	56.0265	53.9057	59.4833	29.4171	47.018	37.8086	ENSG00000051620.10	HEBP2	chr6:138402584-138697288	MB468_CTRL	MB468_W2	OK	56.4718	38.0813	-0.56845	-1.58979	0.0087	0.037563	yes
ENSG00000051825.14	MPHOSPH9	27.8221	23.5202	23.8997	28.2727	26.9406	21.8002	ENSG00000051825.14	MPHOSPH9	chr12:123152319-123272334	MB468_CTRL	MB468_W2	OK	25.0806	25.6711	0.033574	0.0501602	0.91725	0.959418	no
ENSG00000052126.14	PLEKHA5	2.2229	0.635146	0.923677	0.722165	0.203672	0.586523	ENSG00000052126.14	PLEKHA5	chr12:19129751-19376400	MB468_CTRL	MB468_W2	NOTEST	1.26057	0.50412	-1.32224	0	1	1	no
ENSG00000052344.15	PRSS8	25.7677	27.5059	24.1656	20.525	26.2744	28.5891	ENSG00000052344.15	PRSS8	chr16:31131432-31135762	MB468_CTRL	MB468_W2	OK	25.8131	25.1295	-0.0387197	-0.13819	0.7986	0.897174	no
ENSG00000052723.11	SIKE1	71.0995	64.3749	69.4141	46.1349	65.3551	54.4549	ENSG00000052723.11	SIKE1	chr1:114769478-114780685	MB468_CTRL	MB468_W2	OK	68.2961	55.315	-0.304134	-0.945718	0.08975	0.224847	no
ENSG00000052749.13	RRP12	10.9858	15.7927	12.0669	13.6453	12.2037	13.3069	ENSG00000052749.13	RRP12	chr10:97356357-97426076	MB468_CTRL	MB468_W2	OK	12.9485	13.052	0.0114854	0.0258047	0.95885	0.979918	no
ENSG00000052795.12	FNIP2	2.95129	3.09607	3.58249	2.27905	2.87507	3.01582	ENSG00000052795.12	FNIP2	chr4:158769137-159038760	MB468_CTRL	MB468_W2	OK	3.20995	2.72331	-0.237189	-0.285949	0.47555	0.671309	no
ENSG00000052802.12	MSMO1	41.028	37.3709	36.9651	23.7669	23.537	24.8968	ENSG00000052802.12	MSMO1	chr4:165327622-165343160	MB468_CTRL	MB468_W2	OK	38.4547	24.0669	-0.676109	-2.74521	5e-05	0.000470501	yes
ENSG00000052841.14	TTC17	27.7388	36.2822	32.2675	52.4557	66.8494	49.9884	ENSG00000052841.14	TTC17	chr11:43311962-43494933	MB468_CTRL	MB468_W2	OK	32.0962	56.4312	0.814091	1.30725	0.0148	0.0576032	no
ENSG00000052850.5	ALX4	0	0	0	0	0	0	ENSG00000052850.5	ALX4	chr11:44260443-44310166	MB468_CTRL	MB468_W2	NOTEST	0	0	0	0	1	1	no
ENSG00000053108.16	FSTL4	0.506305	0.082376	0.160215	0	0	0.193752	ENSG00000053108.16	FSTL4	chr5:133160437-133612564	MB468_CTRL	MB468_W2	NOTEST	0.249632	0.0645841	-1.95055	0	1	1	no
ENSG00000053254.15	FOXN3	7.27378	7.88156	6.03088	2.42952	4.92814	3.12366	ENSG00000053254.15	FOXN3	chr14:89124870-89954777	MB468_CTRL	MB468_W2	OK	7.06207	3.49377	-1.01531	-0.700835	0.00425	0.0211158	yes
ENSG00000053328.8	METTL24	0.193159	0	0	0	0	0	ENSG00000053328.8	METTL24	chr6:110180140-110358272	MB468_CTRL	MB468_W2	NOTEST	0.0643865	0	#NAME?	0	1	1	no
ENSG00000053371.12	AKR7A2	17.8818	20.8966	21.855	13.5336	16.2095	19.7452	ENSG00000053371.12	AKR7A2	chr1:19303964-19312146	MB468_CTRL	MB468_W2	OK	20.2112	16.4961	-0.293027	-0.987443	0.07645	0.200605	no
ENSG00000053372.4	MRTO4	19.496	20.1803	23.4501	15.2935	27.0247	20.759	ENSG00000053372.4	MRTO4	chr1:19210500-19260128	MB468_CTRL	MB468_W2	OK	21.0422	21.0257	-0.00112713	-0.00253525	0.99605	0.997806	no
ENSG00000053438.8	NNAT	0	0.711645	0.182871	1.29096	1.85586	1.50728	ENSG00000053438.8	NNAT	chr20:37492471-37527931	MB468_CTRL	MB468_W2	NOTEST	0.298172	1.55137	2.37932	0	1	1	no
ENSG00000053501.12	USE1	6.93035	8.90599	6.91399	9.89455	11.0403	8.42265	ENSG00000053501.12	USE1	chr19:17215345-17219829	MB468_CTRL	MB468_W2	OK	7.58344	9.78584	0.367842	0.697619	0.16075	0.336463	no
ENSG00000053524.11	MCF2L2	0	0	0.237721	0.158658	0.264709	0.0658506	ENSG00000053524.11	MCF2L2	chr3:183178042-183428778	MB468_CTRL	MB468_W2	NOTEST	0.0792403	0.163073	1.04121	0	1	1	no
ENSG00000053702.14	NRIP2	0	0	0	0	0	0	ENSG00000053702.14	NRIP2	chr12:1946053-2941140	MB468_CTRL	MB468_W2	NOTEST	0	0	0	0	1	1	no
ENSG00000053747.15	LAMA3	2.39721	4.73497	0.949751	3.23603	2.2194	2.23079	ENSG00000053747.15	LAMA3	chr18:23689442-23955066	MB468_CTRL	MB468_W2	OK	2.69398	2.56207	-0.0724263	-0.0460973	0.8953	0.949275	no
ENSG00000053770.11	AP5M1	28.1461	24.0981	34.2599	27.0518	39.5312	25.4551	ENSG00000053770.11	AP5M1	chr14:57200506-57298742	MB468_CTRL	MB468_W2	OK	28.8347	30.6793	0.0894615	0.121464	0.81675	0.906917	no
ENSG00000053900.10	ANAPC4	6.28328	4.46911	6.94597	7.68551	8.04616	12.2813	ENSG00000053900.10	ANAPC4	chr4:25377212-25418498	MB468_CTRL	MB468_W2	OK	5.89945	9.33766	0.662479	1.07276	0.0183	0.0678466	no
ENSG00000053918.15	KCNQ1	0.955063	1.94884	4.18523	5.22247	2.26763	4.87138	ENSG00000053918.15	KCNQ1	chr11:2444683-2861568	MB468_CTRL	MB468_W2	OK	2.36304	4.12049	0.80217	0.560028	0.2076	0.39873	no
ENSG00000054116.11	TRAPPC3	59.7349	55.271	67.3037	42.3212	53.9565	46.105	ENSG00000054116.11	TRAPPC3	chr1:36136569-36180849	MB468_CTRL	MB468_W2	OK	60.7699	47.4609	-0.356618	-1.06619	0.0487	0.143843	no
ENSG00000054118.13	THRAP3	63.6638	66.6032	75.0585	51.9594	43.1536	52.4703	ENSG00000054118.13	THRAP3	chr1:36224415-36305357	MB468_CTRL	MB468_W2	OK	68.4418	49.1944	-0.476383	-1.44236	0.0074	0.0329476	yes
ENSG00000054148.17	PHPT1	29.171	28.4504	30.4448	30.6103	37.6588	32.7402	ENSG00000054148.17	PHPT1	chr9:136844414-136860799	MB468_CTRL	MB468_W2	OK	29.3554	33.6698	0.197827	0.71761	0.2093	0.401049	no
ENSG00000054179.11	ENTPD2	0.657261	1.14923	1.45816	3.28387	2.16801	1.0829	ENSG00000054179.11	ENTPD2	chr9:137048097-137054045	MB468_CTRL	MB468_W2	NOTEST	1.08822	2.17826	1.00121	0	1	1	no
ENSG00000054219.10	LY75	10.7509	8.84946	8.67799	12.8963	10.7006	6.33708	ENSG00000054219.10	LY75	chr2:159712456-159904749	MB468_CTRL	MB468_W2	OK	9.42612	9.97798	0.0820841	0.143001	0.79595	0.895569	no
ENSG00000054267.20	ARID4B	22.1338	21.377	26.4769	24.9326	49.3719	30.5199	ENSG00000054267.20	ARID4B	chr1:235131182-235344532	MB468_CTRL	MB468_W2	OK	23.3292	34.9415	0.582802	0.644869	0.2374	0.435887	no
ENSG00000054277.13	OPN3	9.86812	8.73661	8.68978	5.12244	14.0078	5.48873	ENSG00000054277.13	OPN3	chr1:241532133-241802133	MB468_CTRL	MB468_W2	OK	9.09817	8.20632	-0.148841	-0.171973	0.73895	0.861587	no
ENSG00000054282.15	SDCCAG8	13.814	19.2895	19.3841	10.412	11.3531	12.4896	ENSG00000054282.15	SDCCAG8	chr1:243256033-243851079	MB468_CTRL	MB468_W2	OK	17.4958	11.4182	-0.615676	-0.817429	0.1165	0.269551	no
ENSG00000054356.13	PTPRN	0	0	0	0	1.3631	0	ENSG00000054356.13	PTPRN	chr2:219289622-219309648	MB468_CTRL	MB468_W2	NOTEST	0	0.454367	inf	0	1	1	no
ENSG00000054392.12	HHAT	0.985015	1.42422	1.56289	0.884694	1.60738	1.32354	ENSG00000054392.12	HHAT	chr1:210328251-210676296	MB468_CTRL	MB468_W2	NOTEST	1.32404	1.27187	-0.0579991	0	1	1	no
ENSG00000054523.17	KIF1B	9.04028	8.50918	9.24398	7.16051	6.21169	7.90896	ENSG00000054523.17	KIF1B	chr1:10210804-10381603	MB468_CTRL	MB468_W2	OK	8.93115	7.09372	-0.332303	-0.740529	0.11045	0.260185	no
ENSG00000054598.6	FOXC1	44.3293	50.6473	47.5479	45.3942	40.879	41.2956	ENSG00000054598.6	FOXC1	chr6:1609971-1613897	MB468_CTRL	MB468_W2	OK	47.5082	42.5229	-0.159934	-1.03317	0.0722	0.192652	no
ENSG00000054611.13	TBC1D22A	11.2813	11.9223	13.3015	10.2176	7.86802	10.2718	ENSG00000054611.13	TBC1D22A	chr22:46762616-47175699	MB468_CTRL	MB468_W2	OK	12.1683	9.45248	-0.364369	-1.0659	0.0255	0.0881723	no
ENSG00000054654.15	SYNE2	8.29346	15.5736	14.2036	14.0065	17.3472	14.1305	ENSG00000054654.15	SYNE2	chr14:63852982-64338599	MB468_CTRL	MB468_W2	OK	12.6902	15.1614	0.256682	0.408756	0.37345	0.580602	no
ENSG00000054690.13	PLEKHH1	3.29142	1.41257	2.03376	16.8085	12.0536	9.7488	ENSG00000054690.13	PLEKHH1	chr14:67447083-67600287	MB468_CTRL	MB468_W2	OK	2.24592	12.8703	2.51867	1.53	5e-05	0.000470501	yes
ENSG00000054793.13	ATP9A	16.6823	18.6866	19.1075	12.8697	13.3608	13.8476	ENSG00000054793.13	ATP9A	chr20:51596513-51768634	MB468_CTRL	MB468_W2	OK	18.1588	13.3594	-0.442813	-2.55245	5e-05	0.000470501	yes
ENSG00000054938.15	CHRDL2	0	0	0	0	0	0	ENSG00000054938.15	CHRDL2	chr11:74696428-74731385	MB468_CTRL	MB468_W2	NOTEST	0	0	0	0	1	1	no
ENSG00000054965.10	FAM168A	26.606	30.859	28.673	16.0832	36.2964	24.1899	ENSG00000054965.10	FAM168A	chr11:73400486-73598189	MB468_CTRL	MB468_W2	OK	28.7127	25.5232	-0.169881	-0.292219	0.51885	0.7054	no
ENSG00000054967.12	RELT	11.4782	13.876	12.4129	16.3343	17.836	18.503	ENSG00000054967.12	RELT	chr11:73376263-73397474	MB468_CTRL	MB468_W2	OK	12.589	17.5578	0.479945	1.74189	0.0012	0.00752479	yes
ENSG00000054983.16	GALC	0.407249	0	0	0	0	0	ENSG00000054983.16	GALC	chr14:87710418-87993665	MB468_CTRL	MB468_W2	NOTEST	0.13575	0	#NAME?	0	1	1	no
ENSG00000055044.10	NOP58	37.2954	50.4341	39.6345	53.4743	70.323	62.6256	ENSG00000055044.10	NOP58	chr2:202265715-202303666	MB468_CTRL	MB468_W2	OK	42.4547	62.1409	0.549622	1.66862	0.00495	0.0238689	yes
ENSG00000055070.16	SZRD1	31.6684	34.302	38.0347	22.2269	28.0316	21.4829	ENSG00000055070.16	SZRD1	chr1:16352574-16437424	MB468_CTRL	MB468_W2	OK	34.6684	23.9138	-0.535777	-2.52829	5e-05	0.000470501	yes
ENSG00000055118.14	KCNH2	0	0	0	0	0.426272	0	ENSG00000055118.14	KCNH2	chr7:150944960-150978315	MB468_CTRL	MB468_W2	NOTEST	0	0.142091	inf	0	1	1	no
ENSG00000055130.15	CUL1	19.7443	17.4692	20.5623	11.4076	12.1528	12.2448	ENSG00000055130.15	CUL1	chr7:148696466-148801036	MB468_CTRL	MB468_W2	OK	19.2586	11.9351	-0.690295	-3.9878	5e-05	0.000470501	yes
ENSG00000055147.18	FAM114A2	10.3141	11.68	14.7181	10.7447	12.4638	8.8595	ENSG00000055147.18	FAM114A2	chr5:153990127-154445850	MB468_CTRL	MB468_W2	OK	12.2374	10.6893	-0.195127	-0.255721	0.5811	0.752433	no
ENSG00000055163.19	CYFIP2	0	0	0	0	0	0	ENSG00000055163.19	CYFIP2	chr5:157260121-157575775	MB468_CTRL	MB468_W2	NOTEST	0	0	0	0	1	1	no
ENSG00000055208.18	TAB2	24.8354	24.6194	25.2929	20.2168	22.6606	16.8069	ENSG00000055208.18	TAB2	chr6:149217925-149411613	MB468_CTRL	MB468_W2	OK	24.9159	19.8948	-0.324677	-1.24151	0.0233	0.0820436	no
ENSG00000055211.12	GINM1	16.0401	20.8565	18.1241	17.2307	15.0371	17.6777	ENSG00000055211.12	GINM1	chr6:149566293-149591748	MB468_CTRL	MB468_W2	OK	18.3402	16.6485	-0.13962	-0.545333	0.32045	0.528061	no
ENSG00000055332.16	EIF2AK2	41.5108	44.1	43.1504	24.7662	25.9001	29.6358	ENSG00000055332.16	EIF2AK2	chr2:37084450-37157065	MB468_CTRL	MB468_W2	OK	42.9204	26.7674	-0.681189	-2.14623	5e-05	0.000470501	yes
ENSG00000055483.19	USP36	30.7362	40.8833	32.9674	30.1092	54.0585	59.0477	ENSG00000055483.19	USP36	chr17:78787380-78841441	MB468_CTRL	MB468_W2	OK	34.8623	47.7385	0.453483	1.14642	0.0324	0.105906	no
ENSG00000055609.17	KMT2C	8.06347	10.4911	16.0428	11.7751	15.6705	18.6582	ENSG00000055609.17	KMT2C	chr7:152134921-152436005	MB468_CTRL	MB468_W2	OK	11.5325	15.3679	0.41422	0.6016	0.2531	0.453802	no
ENSG00000055732.12	MCOLN3	5.01371	6.24387	8.38156	10.1717	12.3678	8.06336	ENSG00000055732.12	MCOLN3	chr1:84999146-85133138	MB468_CTRL	MB468_W2	OK	6.54638	10.201	0.639936	2.0403	0.0008	0.00535066	yes
ENSG00000055813.5	CCDC85A	0	0	0	0	0	0	ENSG00000055813.5	CCDC85A	chr2:55952157-56386173	MB468_CTRL	MB468_W2	NOTEST	0	0	0	0	1	1	no
ENSG00000055917.15	PUM2	59.6307	61.4141	65.1851	43.2864	38.7955	38.6224	ENSG00000055917.15	PUM2	chr2:20248690-20352234	MB468_CTRL	MB468_W2	OK	62.0766	40.2348	-0.625608	-2.45779	5e-05	0.000470501	yes
ENSG00000055950.16	MRPL43	45.4701	36.3566	49.9709	39.7523	53.6051	37.6042	ENSG00000055950.16	MRPL43	chr10:100969457-100994401	MB468_CTRL	MB468_W2	OK	43.9325	43.6539	-0.00918052	-0.0324648	0.9518	0.976306	no
ENSG00000055955.15	ITIH4	0.534259	0.662798	1.38231	0.864073	0.313568	0.292519	ENSG00000055955.15	ITIH4	chr3:52812974-52897596	MB468_CTRL	MB468_W2	NOTEST	0.859791	0.490053	-0.811047	0	1	1	no
ENSG00000055957.10	ITIH1	0.0894411	0	0.231591	0	0	0	ENSG00000055957.10	ITIH1	chr3:52777591-52792068	MB468_CTRL	MB468_W2	NOTEST	0.107011	0	#NAME?	0	1	1	no
ENSG00000056050.6	HPF1	13.2349	17.9883	10.4901	7.57175	4.9277	12.7835	ENSG00000056050.6	HPF1	chr4:169729464-169757953	MB468_CTRL	MB468_W2	OK	13.9044	8.42765	-0.722341	-1.17805	0.0344	0.110803	no
ENSG00000056097.15	ZFR	50.9244	51.5615	52.8865	39.1588	38.6641	40.1585	ENSG00000056097.15	ZFR	chr5:32354349-32444761	MB468_CTRL	MB468_W2	OK	51.7908	39.3271	-0.39717	-1.41703	0.0149	0.0579186	no
ENSG00000056277.15	ZNF280C	4.92323	5.2132	6.15254	4.61764	6.10585	5.02518	ENSG00000056277.15	ZNF280C	chrX:130202710-130268899	MB468_CTRL	MB468_W2	OK	5.42966	5.24956	-0.0486652	-0.169123	0.7605	0.874638	no
ENSG00000056291.17	NPFFR2	0	0	0	0	0	0	ENSG00000056291.17	NPFFR2	chr4:72031803-72148067	MB468_CTRL	MB468_W2	NOTEST	0	0	0	0	1	1	no
ENSG00000056487.15	PHF21B	0	0	0	0	0	0	ENSG00000056487.15	PHF21B	chr22:44881161-45009999	MB468_CTRL	MB468_W2	NOTEST	0	0	0	0	1	1	no
ENSG00000056558.10	TRAF1	0.0204257	0.0502191	0.0427088	0.573098	0.289263	0.534743	ENSG00000056558.10	TRAF1	chr9:120902392-120929173	MB468_CTRL	MB468_W2	NOTEST	0.0377845	0.465701	3.62354	0	1	1	no
ENSG00000056586.15	RC3H2	24.486	30.4866	26.5436	16.2528	21.3786	22.5687	ENSG00000056586.15	RC3H2	chr9:122844555-122905341	MB468_CTRL	MB468_W2	OK	27.1721	20.0667	-0.437322	-1.48125	0.0069	0.0311874	yes
ENSG00000056736.9	IL17RB	1.78221	2.24074	2.89038	2.28993	4.44898	4.11338	ENSG00000056736.9	IL17RB	chr3:53846579-53865800	MB468_CTRL	MB468_W2	OK	2.30444	3.61743	0.650548	1.20148	0.03395	0.109672	no
ENSG00000056972.18	TRAF3IP2	20.4755	23.1602	15.7144	18.1415	28.028	12.9662	ENSG00000056972.18	TRAF3IP2	chr6:111299027-111606278	MB468_CTRL	MB468_W2	OK	19.7834	19.7119	-0.00521949	-0.00869305	0.987	0.993342	no
ENSG00000056998.18	GYG2	4.04065	4.16422	5.14863	2.35303	3.73602	3.16762	ENSG00000056998.18	GYG2	chrX:2828787-2882818	MB468_CTRL	MB468_W2	OK	4.45117	3.08556	-0.528653	-0.659236	0.12865	0.288873	no
ENSG00000057019.15	DCBLD2	16.2556	26.3555	18.4476	15.6417	16.2535	22.7548	ENSG00000057019.15	DCBLD2	chr3:98714329-98901689	MB468_CTRL	MB468_W2	OK	20.3529	18.2167	-0.159972	-0.35301	0.496	0.687676	no
ENSG00000057149.15	SERPINB3	2.41168	1.9032	2.16541	1.71691	2.06068	0.201925	ENSG00000057149.15	SERPINB3	chr18:63647578-63726432	MB468_CTRL	MB468_W2	NOTEST	2.1601	1.3265	-0.703466	0	1	1	no
ENSG00000057252.12	SOAT1	13.8079	13.6521	16.0041	9.27978	12.129	9.64484	ENSG00000057252.12	SOAT1	chr1:179293713-179358680	MB468_CTRL	MB468_W2	OK	14.488	10.3512	-0.485062	-2.53613	5e-05	0.000470501	yes
ENSG00000057294.14	PKP2	19.0396	22.822	19.488	11.2867	19.0844	13.813	ENSG00000057294.14	PKP2	chr12:32790744-32896840	MB468_CTRL	MB468_W2	OK	20.4499	14.728	-0.473524	-1.14278	0.0499	0.146632	no
ENSG00000057468.6	MSH4	0.155377	0.0458682	0.0956389	0.144714	0	0	ENSG00000057468.6	MSH4	chr1:75796881-75913238	MB468_CTRL	MB468_W2	NOTEST	0.0989614	0.0482378	-1.0367	0	1	1	no
ENSG00000057593.13	F7	0	0	0	0	0	0	ENSG00000057593.13	F7	chr13:113105787-113120681	MB468_CTRL	MB468_W2	NOTEST	0	0	0	0	1	1	no
ENSG00000057608.16	GDI2	216.161	221.871	235.752	162.53	161.862	181.067	ENSG00000057608.16	GDI2	chr10:5765222-5842132	MB468_CTRL	MB468_W2	OK	224.594	168.486	-0.41469	-2.4802	5e-05	0.000470501	yes
ENSG00000057657.15	PRDM1	2.09228	2.397	3.81071	3.48097	1.93273	1.82459	ENSG00000057657.15	PRDM1	chr6:106045422-106325820	MB468_CTRL	MB468_W2	OK	2.76666	2.41276	-0.19746	-0.164943	0.66815	0.815187	no
ENSG00000057663.13	ATG5	38.026	28.6909	29.8539	28.7216	29.2838	36.8589	ENSG00000057663.13	ATG5	chr6:106045422-106325820	MB468_CTRL	MB468_W2	OK	32.1902	31.6214	-0.025721	-0.0868148	0.8741	0.938993	no
ENSG00000057704.11	TMCC3	0.101943	0.0655365	0.0679289	0	0	0	ENSG00000057704.11	TMCC3	chr12:94567123-94650562	MB468_CTRL	MB468_W2	NOTEST	0.0784693	0	#NAME?	0	1	1	no
ENSG00000057757.9	PITHD1	45.8412	50.9903	54.0444	38.8851	39.581	47.325	ENSG00000057757.9	PITHD1	chr1:23778404-23788232	MB468_CTRL	MB468_W2	OK	50.2919	41.9304	-0.262332	-1.52743	0.0087	0.037563	yes
ENSG00000057935.13	MTA3	12.1613	17.4584	13.8442	19.0898	22.358	23.0431	ENSG00000057935.13	MTA3	chr2:42494568-42756947	MB468_CTRL	MB468_W2	OK	14.488	21.497	0.569278	1.42806	0.00395	0.0198813	yes
ENSG00000058056.8	USP13	1.67776	1.73041	1.59456	1.33476	2.19388	2.46473	ENSG00000058056.8	USP13	chr3:179652754-179789401	MB468_CTRL	MB468_W2	NOTEST	1.66758	1.99779	0.260651	0	1	1	no
ENSG00000058063.15	ATP11B	14.953	20.9103	19.0262	13.4274	14.7775	8.13054	ENSG00000058063.15	ATP11B	chr3:182793499-182921938	MB468_CTRL	MB468_W2	OK	18.2965	12.1118	-0.595156	-1.06842	0.04755	0.141496	no
ENSG00000058085.14	LAMC2	7.14028	7.99086	8.65373	3.70155	5.77254	5.06551	ENSG00000058085.14	LAMC2	chr1:183186237-183244900	MB468_CTRL	MB468_W2	OK	7.92829	4.84653	-0.710057	-1.29326	0.0032	0.0167984	yes
ENSG00000058091.16	CDK14	7.94064	14.1534	8.79656	2.49212	6.07478	12.5707	ENSG00000058091.16	CDK14	chr7:90335222-91210590	MB468_CTRL	MB468_W2	OK	10.2969	7.04585	-0.547358	-0.449118	0.26495	0.467164	no
ENSG00000058262.9	SEC61A1	73.2097	82.1566	74.5134	61.3098	52.6568	63.1374	ENSG00000058262.9	SEC61A1	chr3:128051640-128408646	MB468_CTRL	MB468_W2	OK	76.6266	59.0347	-0.376282	-1.19904	0.04335	0.132097	no
ENSG00000058272.16	PPP1R12A	18.7232	34.8153	33.8339	23.449	46.4403	46.8548	ENSG00000058272.16	PPP1R12A	chr12:79574978-79942712	MB468_CTRL	MB468_W2	OK	29.1241	38.9147	0.4181	0.581068	0.31245	0.520376	no
ENSG00000058335.15	RASGRF1	6.58258	7.71232	8.73729	6.51042	9.11054	8.32889	ENSG00000058335.15	RASGRF1	chr15:78959946-79090773	MB468_CTRL	MB468_W2	OK	7.6774	7.98328	0.0563651	0.0996566	0.8217	0.909768	no
ENSG00000058404.19	CAMK2B	0.472468	0.332119	0.353855	0.265854	0.416116	0.31094	ENSG00000058404.19	CAMK2B	chr7:44217149-44334577	MB468_CTRL	MB468_W2	NOTEST	0.386147	0.33097	-0.222451	0	1	1	no
ENSG00000058453.16	CROCC	2.05096	2.11665	3.42879	4.3484	4.38644	5.43062	ENSG00000058453.16	CROCC	chr1:16739937-16972979	MB468_CTRL	MB468_W2	OK	2.53213	4.72182	0.89899	0.870834	0.0285	0.0962216	no
ENSG00000058600.15	POLR3E	6.56918	7.9128	6.22036	10.4646	13.7788	20.2418	ENSG00000058600.15	POLR3E	chr16:22297374-22335103	MB468_CTRL	MB468_W2	OK	6.90078	14.8284	1.10353	2.10154	5e-05	0.000470501	yes
ENSG00000058668.14	ATP2B4	15.7079	16.1854	19.8844	10.9223	13.4144	13.6885	ENSG00000058668.14	ATP2B4	chr1:203626560-203744081	MB468_CTRL	MB468_W2	OK	17.2592	12.675	-0.445377	-1.57415	0.0036	0.0184645	yes
ENSG00000058673.15	ZC3H11A	30.1628	29.6353	33.525	35.6914	40.2633	35.1967	ENSG00000058673.15	ZC3H11A	chr1:203795653-203854124	MB468_CTRL	MB468_W2	OK	31.1077	37.0505	0.25222	0.609984	0.2588	0.460284	no
ENSG00000058729.10	RIOK2	13.2408	9.44719	15.6902	10.7717	13.1718	10.218	ENSG00000058729.10	RIOK2	chr5:97089074-97437217	MB468_CTRL	MB468_W2	OK	12.7927	11.3872	-0.167918	-0.34962	0.50835	0.697281	no
ENSG00000058799.13	YIPF1	25.571	26.5181	23.6837	14.8684	21.5211	21.5068	ENSG00000058799.13	YIPF1	chr1:53851718-53889834	MB468_CTRL	MB468_W2	OK	25.2576	19.2988	-0.38821	-1.37717	0.0178	0.0663756	no
ENSG00000058804.11	NDC1	42.3957	53.1712	49.2142	39.3061	37.0356	33.7833	ENSG00000058804.11	NDC1	chr1:53765459-53838860	MB468_CTRL	MB468_W2	OK	48.2604	36.7083	-0.394733	-1.38355	0.0154	0.0593648	no
ENSG00000058866.14	DGKG	0	0	0.39951	0	0	0	ENSG00000058866.14	DGKG	chr3:186046307-186362237	MB468_CTRL	MB468_W2	NOTEST	0.13317	0	#NAME?	0	1	1	no
ENSG00000059122.16	FLYWCH1	6.26282	4.65781	5.13736	10.1566	12.5122	16.2386	ENSG00000059122.16	FLYWCH1	chr16:2911936-2954276	MB468_CTRL	MB468_W2	OK	5.35266	12.9691	1.27675	1.62095	0.0005	0.00361388	yes
ENSG00000059145.18	UNKL	11.4659	7.23524	9.75849	21.6505	21.8965	18.7757	ENSG00000059145.18	UNKL	chr16:1351922-1414751	MB468_CTRL	MB468_W2	OK	9.48656	20.7743	1.13084	1.70762	0.0008	0.00535066	yes
ENSG00000059377.15	TBXAS1	0.832375	1.03059	0.403247	0	0.926466	0.404794	ENSG00000059377.15	TBXAS1	chr7:139561569-140020325	MB468_CTRL	MB468_W2	NOTEST	0.755403	0.443753	-0.767489	0	1	1	no
ENSG00000059378.12	PARP12	11.2003	12.2216	14.0404	13.9946	23.8679	27.2329	ENSG00000059378.12	PARP12	chr7:140023743-140063721	MB468_CTRL	MB468_W2	OK	12.4874	21.6985	0.797114	1.84137	0.0003	0.00233849	yes
ENSG00000059573.8	ALDH18A1	30.1667	31.082	26.1549	19.3986	18.7508	17.2001	ENSG00000059573.8	ALDH18A1	chr10:95605928-95656706	MB468_CTRL	MB468_W2	OK	29.1345	18.4498	-0.659124	-1.89994	0.00135	0.00827428	yes
ENSG00000059588.9	TARBP1	17.1552	18.1188	20.2231	31.9235	40.2374	28.3966	ENSG00000059588.9	TARBP1	chr1:234391312-234479103	MB468_CTRL	MB468_W2	OK	18.499	33.5192	0.857537	2.68003	5e-05	0.000470501	yes
ENSG00000059691.11	GATB	4.97763	5.87592	7.37606	6.45968	3.79116	3.86055	ENSG00000059691.11	GATB	chr4:151670503-151761023	MB468_CTRL	MB468_W2	OK	6.07654	4.7038	-0.369424	-0.559017	0.20465	0.394781	no
ENSG00000059728.10	MXD1	10.4373	10.649	12.6461	9.55215	8.96287	12.1909	ENSG00000059728.10	MXD1	chr2:69893559-69942945	MB468_CTRL	MB468_W2	OK	11.2442	10.2353	-0.13562	-0.378415	0.4669	0.663982	no
ENSG00000059758.7	CDK17	6.77437	5.99821	6.25036	10.5259	7.95495	6.89463	ENSG00000059758.7	CDK17	chr12:96278260-96400560	MB468_CTRL	MB468_W2	OK	6.34098	8.45851	0.415697	0.539787	0.15995	0.335229	no
ENSG00000059769.19	DNAJC25	4.06274	3.8337	4.46641	5.04385	6.41201	5.63651	ENSG00000059769.19	DNAJC25	chr9:111631351-111670246	MB468_CTRL	MB468_W2	OK	4.12095	5.69745	0.467341	1.37816	0.0177	0.0661238	no
ENSG00000059804.15	SLC2A3	0.214118	0.550328	1.34427	0	0.344568	0	ENSG00000059804.15	SLC2A3	chr12:7919229-7936275	MB468_CTRL	MB468_W2	NOTEST	0.702906	0.114856	-2.6135	0	1	1	no
ENSG00000059915.16	PSD	0	0	0.286649	0.757901	0	0	ENSG00000059915.16	PSD	chr10:102402616-102423136	MB468_CTRL	MB468_W2	NOTEST	0.0955495	0.252634	1.40273	0	1	1	no
ENSG00000060069.16	CTDP1	6.35975	7.83075	7.03532	7.39917	4.85521	6.34919	ENSG00000060069.16	CTDP1	chr18:79679800-79756623	MB468_CTRL	MB468_W2	OK	7.07528	6.20119	-0.190241	-0.439674	0.3434	0.551764	no
ENSG00000060138.12	YBX3	132.753	148.09	148.078	123.31	128.674	114.226	ENSG00000060138.12	YBX3	chr12:10699088-10723312	MB468_CTRL	MB468_W2	OK	142.974	122.07	-0.228045	-0.851274	0.09665	0.236824	no
ENSG00000060140.8	STYK1	1.55489	1.72262	2.87785	1.93838	2.45251	1.71206	ENSG00000060140.8	STYK1	chr12:10618938-10674318	MB468_CTRL	MB468_W2	NOTEST	2.05179	2.03432	-0.0123372	0	1	1	no
ENSG00000060237.16	WNK1	50.8742	54.3001	53.7998	53.9114	42.4356	50.8885	ENSG00000060237.16	WNK1	chr12:752592-911452	MB468_CTRL	MB468_W2	OK	52.9914	49.0785	-0.110668	-0.330917	0.53955	0.721763	no
ENSG00000060303.5	RPS17P5	0.3876	0	0.361537	0	0	0	ENSG00000060303.5	RPS17P5	chr6:50857254-50857662	MB468_CTRL	MB468_W2	NOTEST	0.249712	0	#NAME?	0	1	1	no
ENSG00000060339.13	CCAR1	39.3899	27.4667	41.1139	36.9494	38.1835	39.6807	ENSG00000060339.13	CCAR1	chr10:68721011-68792377	MB468_CTRL	MB468_W2	OK	35.9902	38.2712	0.0886573	0.231662	0.67355	0.818669	no
ENSG00000060491.16	OGFR	10.0601	11.1791	9.84619	6.53839	10.9562	9.88259	ENSG00000060491.16	OGFR	chr20:62796452-62814000	MB468_CTRL	MB468_W2	OK	10.3618	9.12572	-0.183262	-0.635757	0.2421	0.441465	no
ENSG00000060558.3	GNA15	2.10306	2.51258	3.22605	0.906045	2.78784	2.63479	ENSG00000060558.3	GNA15	chr19:3136192-3163769	MB468_CTRL	MB468_W2	OK	2.6139	2.10956	-0.309262	-0.430695	0.35825	0.566291	no
ENSG00000060566.13	CREB3L3	0	0	0	0	0	0	ENSG00000060566.13	CREB3L3	chr19:4153600-4173054	MB468_CTRL	MB468_W2	NOTEST	0	0	0	0	1	1	no
ENSG00000060642.10	PIGV	2.401	3.77434	2.82144	3.40618	4.05172	1.55492	ENSG00000060642.10	PIGV	chr1:26787471-26798398	MB468_CTRL	MB468_W2	OK	2.99893	3.00428	0.00257016	0.00269666	0.99565	0.99766	no
ENSG00000060656.19	PTPRU	2.33315	2.63641	2.5074	7.02592	3.20993	4.38909	ENSG00000060656.19	PTPRU	chr1:29236515-29326813	MB468_CTRL	MB468_W2	OK	2.49232	4.87498	0.967907	0.811112	0.0269	0.0918948	no
ENSG00000060688.12	SNRNP40	22.2866	26.2389	29.1899	18.8809	19.3547	21.4163	ENSG00000060688.12	SNRNP40	chr1:31259567-31296782	MB468_CTRL	MB468_W2	OK	25.9052	19.8839	-0.381635	-1.23774	0.0266	0.0911588	no
ENSG00000060709.14	RIMBP2	0	0	0	0	0	0	ENSG00000060709.14	RIMBP2	chr12:130396136-130517917	MB468_CTRL	MB468_W2	NOTEST	0	0	0	0	1	1	no
ENSG00000060718.19	COL11A1	0	0	0	0	0	0	ENSG00000060718.19	COL11A1	chr1:102876466-103108496	MB468_CTRL	MB468_W2	NOTEST	0	0	0	0	1	1	no
ENSG00000060749.14	QSER1	88.6215	91.6555	86.2535	53.3718	55.2704	52.4313	ENSG00000060749.14	QSER1	chr11:32893177-32993316	MB468_CTRL	MB468_W2	OK	88.8435	53.6911	-0.726582	-2.34995	5e-05	0.000470501	yes
ENSG00000060762.18	MPC1	52.1858	45.9726	52.4937	50.9158	46.7025	49.0586	ENSG00000060762.18	MPC1	chr6:166364918-166383013	MB468_CTRL	MB468_W2	OK	50.2174	48.8923	-0.0385786	-0.145053	0.79085	0.892681	no
ENSG00000060971.17	ACAA1	9.66163	14.0471	16.5171	17.0063	18.3743	15.632	ENSG00000060971.17	ACAA1	chr3:38039204-38137242	MB468_CTRL	MB468_W2	OK	13.4086	17.0042	0.342728	0.874393	0.0741	0.196237	no
ENSG00000060982.14	BCAT1	0	0	0.0194233	0	0	0.0513344	ENSG00000060982.14	BCAT1	chr12:24810021-24960158	MB468_CTRL	MB468_W2	NOTEST	0.00647444	0.0171115	1.40213	0	1	1	no
ENSG00000061273.17	HDAC7	19.4033	31.0314	24.9029	43.0408	43.8644	41.558	ENSG00000061273.17	HDAC7	chr12:47706084-47837898	MB468_CTRL	MB468_W2	OK	25.1125	42.821	0.769911	1.65993	0.00045	0.00330662	yes
ENSG00000061337.15	LZTS1	0	0	0	0	0	0	ENSG00000061337.15	LZTS1	chr8:20246164-20303963	MB468_CTRL	MB468_W2	NOTEST	0	0	0	0	1	1	no
ENSG00000061455.10	PRDM6	0.12895	2.38547	0	0.138438	1.43783	0.748808	ENSG00000061455.10	PRDM6	chr5:123087247-123194266	MB468_CTRL	MB468_W2	NOTEST	0.838139	0.775025	-0.112947	0	1	1	no
ENSG00000061492.11	WNT8A	0	0	0	0	0	0	ENSG00000061492.11	WNT8A	chr5:138083891-138092365	MB468_CTRL	MB468_W2	NOTEST	0	0	0	0	1	1	no
ENSG00000061656.9	SPAG4	0.254138	0	0	3.3385	2.18922	2.15837	ENSG00000061656.9	SPAG4	chr20:35615891-35621049	MB468_CTRL	MB468_W2	NOTEST	0.0847127	2.56203	4.91857	0	1	1	no
ENSG00000061676.14	NCKAP1	73.2191	70.2355	72.3491	41.9489	50.5235	56.79	ENSG00000061676.14	NCKAP1	chr2:182909114-183038858	MB468_CTRL	MB468_W2	OK	71.9346	49.7541	-0.531869	-1.78424	0.00335	0.0174162	yes
ENSG00000061794.12	MRPS35	24.5197	22.2511	22.22	12.8018	16.4852	17.6086	ENSG00000061794.12	MRPS35	chr12:27710772-27756295	MB468_CTRL	MB468_W2	OK	22.9969	15.6319	-0.556948	-2.00013	0.00065	0.004501	yes
ENSG00000061918.12	GUCY1B3	4.91717	5.84761	4.70813	6.5164	4.71006	7.5233	ENSG00000061918.12	GUCY1B3	chr4:155758991-155807591	MB468_CTRL	MB468_W2	OK	5.15764	6.24992	0.277128	1.01864	0.0649	0.178234	no
ENSG00000061936.9	SFSWAP	14.5886	13.9527	15.3486	12.9686	12.0347	24.4988	ENSG00000061936.9	SFSWAP	chr12:131711080-131799737	MB468_CTRL	MB468_W2	OK	14.63	16.5007	0.173601	0.25941	0.5911	0.759589	no
ENSG00000061938.16	TNK2	9.53518	7.94656	7.54363	16.3146	18.2955	15.1223	ENSG00000061938.16	TNK2	chr3:195863363-195911945	MB468_CTRL	MB468_W2	OK	8.34179	16.5775	0.990794	1.61488	0.0008	0.00535066	yes
ENSG00000061987.14	MON2	6.83935	7.09404	6.11053	5.70197	12.5609	3.39021	ENSG00000061987.14	MON2	chr12:62466816-62600479	MB468_CTRL	MB468_W2	OK	6.68131	7.21771	0.11141	0.161709	0.7346	0.858509	no
ENSG00000062038.13	CDH3	10.0375	9.14309	9.88348	15.2731	15.2122	8.35047	ENSG00000062038.13	CDH3	chr16:68636188-68722616	MB468_CTRL	MB468_W2	OK	9.68802	12.9453	0.418152	0.947612	0.0781	0.203579	no
ENSG00000062096.14	ARSF	0	0	0	0	0	0	ENSG00000062096.14	ARSF	chrX:3041470-3112726	MB468_CTRL	MB468_W2	NOTEST	0	0	0	0	1	1	no
ENSG00000062194.15	GPBP1	17.7359	17.1919	18.0081	21.8707	19.6922	21.576	ENSG00000062194.15	GPBP1	chr5:57173947-57264679	MB468_CTRL	MB468_W2	OK	17.6453	21.0463	0.254282	0.80489	0.1287	0.288915	no
ENSG00000062282.14	DGAT2	7.2089	8.99852	9.08887	5.43889	6.45852	6.67645	ENSG00000062282.14	DGAT2	chr11:75758454-75803415	MB468_CTRL	MB468_W2	OK	8.43209	6.19128	-0.445653	-0.928118	0.06285	0.173947	no
ENSG00000062370.16	ZNF112	2.38876	3.35341	2.54421	2.08269	3.51304	4.36618	ENSG00000062370.16	ZNF112	chr19:44326554-44448578	MB468_CTRL	MB468_W2	OK	2.76212	3.32064	0.265682	0.355272	0.45275	0.652441	no
ENSG00000062485.18	CS	59.0705	59.1169	53.1627	42.113	53.9632	56.6715	ENSG00000062485.18	CS	chr12:56271698-56334053	MB468_CTRL	MB468_W2	OK	57.1167	50.9159	-0.165795	-0.547577	0.278	0.482697	no
ENSG00000062524.15	LTK	0	0	0	0	0	0	ENSG00000062524.15	LTK	chr15:41503637-41513887	MB468_CTRL	MB468_W2	NOTEST	0	0	0	0	1	1	no
ENSG00000062582.13	MRPS24	98.5664	93.6132	106.63	83.5298	73.4619	119.469	ENSG00000062582.13	MRPS24	chr7:43866557-43926411	MB468_CTRL	MB468_W2	OK	99.6033	92.1536	-0.112154	-0.457853	0.4222	0.625307	no
ENSG00000062598.17	ELMO2	10.3497	10.4058	6.71776	17.4883	8.01231	13.7327	ENSG00000062598.17	ELMO2	chr20:46364550-46459276	MB468_CTRL	MB468_W2	OK	9.15775	13.0778	0.51405	0.88935	0.07115	0.190517	no
ENSG00000062650.17	WAPL	23.3593	22.4522	27.2208	18.434	17.4546	21.2185	ENSG00000062650.17	WAPL	chr10:86435255-86521815	MB468_CTRL	MB468_W2	OK	24.3441	19.0357	-0.354864	-1.09963	0.0503	0.147452	no
ENSG00000062716.11	VMP1	49.9083	41.845	46.6939	124.621	120.119	128.672	ENSG00000062716.11	VMP1	chr17:59618552-59842255	MB468_CTRL	MB468_W2	OK	46.1491	124.471	1.43144	2.62345	0.00015	0.00126619	yes
ENSG00000062725.9	APPBP2	6.64569	5.48182	7.33276	5.2394	7.83822	7.04418	ENSG00000062725.9	APPBP2	chr17:60443148-60526219	MB468_CTRL	MB468_W2	OK	6.48676	6.70726	0.0482271	0.0716814	0.8758	0.939854	no
ENSG00000062822.12	POLD1	25.0965	25.2003	28.0735	29.3645	40.7496	35.9178	ENSG00000062822.12	POLD1	chr19:50384203-50431313	MB468_CTRL	MB468_W2	OK	26.1234	35.344	0.436121	1.24598	0.0299	0.0998355	no
ENSG00000063015.19	SEZ6	0	0	0	0	0	0	ENSG00000063015.19	SEZ6	chr17:28905249-29057220	MB468_CTRL	MB468_W2	NOTEST	0	0	0	0	1	1	no
ENSG00000063046.17	EIF4B	49.8703	46.3602	54.9384	38.924	46.3744	42.0764	ENSG00000063046.17	EIF4B	chr12:53006157-53079420	MB468_CTRL	MB468_W2	OK	50.3896	42.4583	-0.247082	-0.628132	0.2477	0.447712	no
ENSG00000063127.15	SLC6A16	0.08147	0.244247	0.160923	0.206249	2.57106	0.226298	ENSG00000063127.15	SLC6A16	chr19:49289637-49325225	MB468_CTRL	MB468_W2	NOTEST	0.162213	1.0012	2.62577	0	1	1	no
ENSG00000063169.10	GLTSCR1	4.62919	9.68825	5.82358	10.6535	8.28414	9.5907	ENSG00000063169.10	GLTSCR1	chr19:47607523-47743134	MB468_CTRL	MB468_W2	OK	6.71367	9.50943	0.502256	1.04655	0.0563	0.160484	no
ENSG00000063176.15	SPHK2	7.20133	8.71013	8.45684	9.41496	12.438	10.937	ENSG00000063176.15	SPHK2	chr19:48615327-48637438	MB468_CTRL	MB468_W2	OK	8.12277	10.93	0.428248	0.371616	0.482	0.676635	no
ENSG00000063177.12	RPL18	952.394	1006.26	1047.22	699.485	920.09	863.476	ENSG00000063177.12	RPL18	chr19:48615327-48637438	MB468_CTRL	MB468_W2	OK	1001.96	827.684	-0.27567	-1.54437	0.0068	0.0308534	yes
ENSG00000063180.8	CA11	4.37545	1.2771	3.51722	2.01746	8.52002	2.55431	ENSG00000063180.8	CA11	chr19:48637941-48682245	MB468_CTRL	MB468_W2	OK	3.05659	4.36393	0.513705	0.308102	0.47665	0.672369	no
ENSG00000063241.7	ISOC2	50.6297	54.3246	48.5685	48.1986	60.548	57.1629	ENSG00000063241.7	ISOC2	chr19:55452984-55462343	MB468_CTRL	MB468_W2	OK	51.1742	55.3032	0.111944	0.478561	0.4056	0.609789	no
ENSG00000063244.12	U2AF2	103.389	106.776	117.793	86.8759	118.645	113.446	ENSG00000063244.12	U2AF2	chr19:55654145-55674715	MB468_CTRL	MB468_W2	OK	109.319	106.322	-0.0401048	-0.177892	0.73305	0.857326	no
ENSG00000063245.14	EPN1	90.2633	85.5988	77.5229	72.8193	58.1061	86.5498	ENSG00000063245.14	EPN1	chr19:55675225-55738402	MB468_CTRL	MB468_W2	OK	84.4617	72.4917	-0.22048	-0.730648	0.20595	0.39662	no
ENSG00000063322.13	MED29	23.7836	28.481	29.1232	25.8383	21.8798	36.6797	ENSG00000063322.13	MED29	chr19:39391302-39400637	MB468_CTRL	MB468_W2	OK	27.1292	28.1326	0.0523953	0.167753	0.76475	0.877132	no
ENSG00000063438.16	AHRR	1.62204	0.577834	1.7016	1.06478	1.02173	0.262666	ENSG00000063438.16	AHRR	chr5:271620-438291	MB468_CTRL	MB468_W2	NOTEST	1.30049	0.783056	-0.731867	0	1	1	no
ENSG00000063515.2	GSC2	0	0	0	0	0	0	ENSG00000063515.2	GSC2	chr22:19148575-19150283	MB468_CTRL	MB468_W2	NOTEST	0	0	0	0	1	1	no
ENSG00000063587.13	ZNF275	0.66603	0.860052	0.910081	0.672135	0.224088	0.28092	ENSG00000063587.13	ZNF275	chrX:153334154-153360110	MB468_CTRL	MB468_W2	NOTEST	0.812054	0.392381	-1.04932	0	1	1	no
ENSG00000063601.16	MTMR1	23.6801	18.8579	20.112	13.4072	28.3606	16.9233	ENSG00000063601.16	MTMR1	chrX:150692970-150765103	MB468_CTRL	MB468_W2	OK	20.8833	19.5637	-0.0941713	-0.206436	0.63975	0.795742	no
ENSG00000063660.8	GPC1	11.9005	16.188	13.1579	6.06415	9.27785	10.6173	ENSG00000063660.8	GPC1	chr2:240435670-240468078	MB468_CTRL	MB468_W2	OK	13.7488	8.65309	-0.668019	-1.50948	0.0036	0.0184645	yes
ENSG00000063761.15	ADCK1	2.6656	2.86781	6.40397	3.96749	2.82702	1.99658	ENSG00000063761.15	ADCK1	chr14:77800082-77935012	MB468_CTRL	MB468_W2	OK	3.97913	2.93036	-0.441373	-0.510817	0.2624	0.464164	no
ENSG00000063854.12	HAGH	9.76455	12.9058	10.4614	7.28249	7.83771	10.8391	ENSG00000063854.12	HAGH	chr16:1795619-1884294	MB468_CTRL	MB468_W2	OK	11.0439	8.65308	-0.351965	-0.720648	0.1447	0.312783	no
ENSG00000063978.15	RNF4	29.1609	37.0128	43.4185	24.614	39.0968	30.7211	ENSG00000063978.15	RNF4	chr4:2418973-2732565	MB468_CTRL	MB468_W2	OK	36.5307	31.4773	-0.214798	-0.548866	0.2862	0.492063	no
ENSG00000064012.21	CASP8	15.5671	11.6147	19.8303	13.8963	15.8478	12.1703	ENSG00000064012.21	CASP8	chr2:201233442-201287711	MB468_CTRL	MB468_W2	OK	15.6707	13.9715	-0.165585	-0.217342	0.5893	0.758632	no
ENSG00000064042.17	LIMCH1	52.1986	52.1368	54.0417	76.3929	52.6647	46.8953	ENSG00000064042.17	LIMCH1	chr4:41359606-41700044	MB468_CTRL	MB468_W2	OK	52.7923	58.651	0.151827	0.27973	0.596	0.763237	no
ENSG00000064102.14	ASUN	15.0635	19.2203	18.4714	14.1025	18.0449	15.2605	ENSG00000064102.14	ASUN	chr12:26905180-26938326	MB468_CTRL	MB468_W2	OK	17.5851	15.8026	-0.15419	-0.306313	0.5357	0.719106	no
ENSG00000064115.10	TM7SF3	33.5082	29.098	30.5006	35.6401	27.3896	21.8809	ENSG00000064115.10	TM7SF3	chr12:26971585-27014434	MB468_CTRL	MB468_W2	OK	31.0356	28.3035	-0.132944	-0.26187	0.5587	0.736414	no
ENSG00000064195.7	DLX3	3.84821	3.64412	4.88571	2.25629	5.71236	5.24184	ENSG00000064195.7	DLX3	chr17:49990004-49995224	MB468_CTRL	MB468_W2	OK	4.12601	4.4035	0.093901	0.15915	0.77675	0.884336	no
ENSG00000064199.6	SPA17	1.44742	1.36162	1.45545	0.909772	0.621761	1.49882	ENSG00000064199.6	SPA17	chr11:124622835-124697518	MB468_CTRL	MB468_W2	NOTEST	1.4215	1.01012	-0.492888	0	1	1	no
ENSG00000064201.15	TSPAN32	0	0	0	0	0	0	ENSG00000064201.15	TSPAN32	chr11:2295644-2318200	MB468_CTRL	MB468_W2	NOTEST	0	0	0	0	1	1	no
ENSG00000064205.10	WISP2	0.200925	0.250845	0.190299	0	0.33061	0	ENSG00000064205.10	WISP2	chr20:44656450-44810338	MB468_CTRL	MB468_W2	NOTEST	0.214023	0.110203	-0.957598	0	1	1	no
ENSG00000064218.4	DMRT3	0	0.11116	0	0	0	0.325404	ENSG00000064218.4	DMRT3	chr9:976963-991731	MB468_CTRL	MB468_W2	NOTEST	0.0370534	0.108468	1.54959	0	1	1	no
ENSG00000064225.12	ST3GAL6	3.95562	1.16985	1.5253	3.32902	1.90321	3.99641	ENSG00000064225.12	ST3GAL6	chr3:98714329-98901689	MB468_CTRL	MB468_W2	OK	2.21692	3.07622	0.4726	0.194617	0.2673	0.469794	no
ENSG00000064270.12	ATP2C2	6.35654	10.9772	7.63047	17.5296	16.887	12.3827	ENSG00000064270.12	ATP2C2	chr16:84368526-84467361	MB468_CTRL	MB468_W2	OK	8.3214	15.5998	0.906628	1.54797	0.00075	0.00507364	yes
ENSG00000064300.8	NGFR	0.103581	0.108271	0	0	0	0	ENSG00000064300.8	NGFR	chr17:49494222-49583827	MB468_CTRL	MB468_W2	NOTEST	0.0706172	0	#NAME?	0	1	1	no
ENSG00000064309.14	CDON	5.23989	6.38038	7.59584	8.42924	11.2233	6.53779	ENSG00000064309.14	CDON	chr11:125955795-126063335	MB468_CTRL	MB468_W2	OK	6.40537	8.73011	0.446719	0.477779	0.3255	0.533385	no
ENSG00000064313.11	TAF2	16.1178	18.6609	11.1896	13.0409	12.6978	18.1737	ENSG00000064313.11	TAF2	chr8:119730774-119832863	MB468_CTRL	MB468_W2	OK	15.3228	14.6375	-0.066009	-0.134964	0.796	0.89557	no
ENSG00000064393.15	HIPK2	12.8468	15.4181	13.0671	6.95467	7.60821	9.54808	ENSG00000064393.15	HIPK2	chr7:139561569-140020325	MB468_CTRL	MB468_W2	OK	13.7774	8.03698	-0.777574	-3.70896	5e-05	0.000470501	yes
ENSG00000064419.13	TNPO3	36.2298	40.7673	39.8924	25.3228	25.9683	26.7397	ENSG00000064419.13	TNPO3	chr7:128954179-129055173	MB468_CTRL	MB468_W2	OK	38.9632	26.0103	-0.58303	-3.64848	5e-05	0.000470501	yes
ENSG00000064489.22	BORCS8-MEF2B	2.86201	7.10004	5.3314	4.67686	3.00533	4.54421	ENSG00000064489.22	BORCS8-MEF2B	chr19:19145566-19203424	MB468_CTRL	MB468_W2	OK	5.09782	4.07547	-0.322914	-0.332342	0.4871	0.680562	no
ENSG00000064490.13	RFXANK	17.9207	16.1933	19.2526	21.6029	25.1399	16.616	ENSG00000064490.13	RFXANK	chr19:19145566-19203424	MB468_CTRL	MB468_W2	OK	17.7889	21.1196	0.247607	0.479028	0.323	0.530831	no
ENSG00000064545.14	TMEM161A	19.5084	19.6866	21.2356	26.0435	20.8591	35.2442	ENSG00000064545.14	TMEM161A	chr19:19119168-19138513	MB468_CTRL	MB468_W2	OK	20.1435	27.3823	0.442926	1.02104	0.058	0.164029	no
ENSG00000064547.13	LPAR2	27.5394	32.3164	31.9877	37.6398	40.4918	46.6363	ENSG00000064547.13	LPAR2	chr19:19623667-19628930	MB468_CTRL	MB468_W2	OK	30.6145	41.5893	0.441998	1.30639	0.0189	0.0695784	no
ENSG00000064601.16	CTSA	24.6856	26.2922	32.1143	21.9743	34.0342	26.5284	ENSG00000064601.16	CTSA	chr20:45888624-45912155	MB468_CTRL	MB468_W2	OK	27.6974	27.5123	-0.00967313	-0.024837	0.9609	0.981052	no
ENSG00000064607.16	SUGP2	33.6702	36.3379	32.595	54.7085	105.022	81.1287	ENSG00000064607.16	SUGP2	chr19:18990887-19060311	MB468_CTRL	MB468_W2	OK	34.201	80.2865	1.23112	3.07031	5e-05	0.000470501	yes
ENSG00000064651.13	SLC12A2	72.0987	70.2486	79.8944	45.1173	44.5555	44.5562	ENSG00000064651.13	SLC12A2	chr5:128083765-128189688	MB468_CTRL	MB468_W2	OK	74.0805	44.743	-0.727433	-3.5901	5e-05	0.000470501	yes
ENSG00000064652.10	SNX24	26.0133	27.5356	19.4764	26.4055	23.015	30.7476	ENSG00000064652.10	SNX24	chr5:122843438-123054667	MB468_CTRL	MB468_W2	OK	24.3417	26.7227	0.134634	0.233939	0.6512	0.803413	no
ENSG00000064655.18	EYA2	9.75079	8.7287	10.0551	8.5733	6.33336	6.73041	ENSG00000064655.18	EYA2	chr20:46894623-47188844	MB468_CTRL	MB468_W2	OK	9.51152	7.21236	-0.399205	-0.524726	0.16425	0.341565	no
ENSG00000064666.14	CNN2	81.224	87.1796	93.1515	60.8035	71.8904	69.8962	ENSG00000064666.14	CNN2	chr19:1026580-1039068	MB468_CTRL	MB468_W2	OK	87.1851	67.53	-0.368551	-2.18809	5e-05	0.000470501	yes
ENSG00000064687.12	ABCA7	7.34832	5.22872	6.24765	20.6029	17.488	12.6743	ENSG00000064687.12	ABCA7	chr19:1040100-1065572	MB468_CTRL	MB468_W2	OK	6.2749	16.9217	1.43121	1.70564	5e-05	0.000470501	yes
ENSG00000064692.18	SNCAIP	1.41228	0.654112	0.23613	0.739708	1.64825	5.35674	ENSG00000064692.18	SNCAIP	chr5:122311296-122479087	MB468_CTRL	MB468_W2	NOTEST	0.767506	2.58157	1.75	0	1	1	no
ENSG00000064703.11	DDX20	10.5239	15.495	14.0501	12.7497	27.4849	13.5702	ENSG00000064703.11	DDX20	chr1:111483347-111768016	MB468_CTRL	MB468_W2	OK	13.3563	17.9349	0.425248	0.730727	0.16315	0.339972	no
ENSG00000064726.9	BTBD1	26.1892	22.9826	21.9887	18.3689	15.1959	17.0922	ENSG00000064726.9	BTBD1	chr15:82836945-83103443	MB468_CTRL	MB468_W2	OK	23.7202	16.8857	-0.490316	-1.41422	0.0102	0.0427404	yes
ENSG00000064763.10	FAR2	8.52519	8.35663	6.04149	1.82039	4.41281	4.98039	ENSG00000064763.10	FAR2	chr12:29149102-29381189	MB468_CTRL	MB468_W2	OK	7.6411	3.73786	-1.03157	-1.02982	0.0376	0.11868	no
ENSG00000064787.13	BCAS1	0.0761016	0.131162	0.170561	0	0	0	ENSG00000064787.13	BCAS1	chr20:53936776-54070594	MB468_CTRL	MB468_W2	NOTEST	0.125942	0	#NAME?	0	1	1	no
ENSG00000064835.10	POU1F1	0	0	0	0	0	0	ENSG00000064835.10	POU1F1	chr3:87259403-87276587	MB468_CTRL	MB468_W2	NOTEST	0	0	0	0	1	1	no
ENSG00000064886.13	CHI3L2	1.62736	1.11442	2.23393	3.91751	0.980188	4.73855	ENSG00000064886.13	CHI3L2	chr1:111187173-111243440	MB468_CTRL	MB468_W2	OK	1.65857	3.21208	0.953568	0.490029	0.04245	0.130112	no
ENSG00000064932.15	SBNO2	35.1491	29.0304	35.348	36.4173	42.5818	45.2279	ENSG00000064932.15	SBNO2	chr19:1107635-1174283	MB468_CTRL	MB468_W2	OK	33.1758	41.409	0.319813	0.933652	0.0954	0.234781	no
ENSG00000064933.16	PMS1	6.24289	4.71924	9.95601	10.6595	6.03665	19.9852	ENSG00000064933.16	PMS1	chr2:189770322-189877629	MB468_CTRL	MB468_W2	OK	6.97271	12.2271	0.810292	0.811387	0.06035	0.168735	no
ENSG00000064961.18	HMG20B	37.8055	37.6773	34.8981	41.6113	47.9731	45.4575	ENSG00000064961.18	HMG20B	chr19:3506272-3579088	MB468_CTRL	MB468_W2	OK	36.7936	45.014	0.290916	0.888638	0.108	0.256125	no
ENSG00000064989.12	CALCRL	0	0	0	0	0	0	ENSG00000064989.12	CALCRL	chr2:187001875-187565760	MB468_CTRL	MB468_W2	NOTEST	0	0	0	0	1	1	no
ENSG00000064995.16	TAF11	28.6069	29.3371	33.5966	24.3158	25.771	29.3311	ENSG00000064995.16	TAF11	chr6:34792014-34888089	MB468_CTRL	MB468_W2	OK	30.5135	26.4726	-0.204947	-0.794137	0.1748	0.356288	no
ENSG00000064999.13	ANKS1A	9.7718	12.2536	13.1517	8.95379	9.5996	9.74015	ENSG00000064999.13	ANKS1A	chr6:34889264-35091413	MB468_CTRL	MB468_W2	OK	11.7257	9.43118	-0.314165	-1.75017	0.0024	0.0132777	yes
ENSG00000065000.15	AP3D1	38.3698	34.9076	35.7502	29.4478	30.4798	35.7417	ENSG00000065000.15	AP3D1	chr19:2100987-2248679	MB468_CTRL	MB468_W2	OK	36.3425	31.8898	-0.188566	-0.449053	0.4047	0.609011	no
ENSG00000065029.14	ZNF76	11.7716	15.2431	15.3285	12.9425	21.6272	24.8645	ENSG00000065029.14	ZNF76	chr6:35258908-35295985	MB468_CTRL	MB468_W2	OK	14.1144	19.8114	0.48916	1.25416	0.0197	0.0719239	no
ENSG00000065054.13	SLC9A3R2	13.6811	15.6703	19.0707	11.9885	15.6463	18.7171	ENSG00000065054.13	SLC9A3R2	chr16:2025355-2039026	MB468_CTRL	MB468_W2	OK	16.1407	15.4506	-0.0630356	-0.224453	0.66385	0.812131	no
ENSG00000065057.7	NTHL1	5.39712	8.92971	7.57213	4.7836	15.4581	14.511	ENSG00000065057.7	NTHL1	chr16:2039814-2135898	MB468_CTRL	MB468_W2	OK	7.29965	11.5842	0.666262	0.847849	0.1184	0.272656	no
ENSG00000065060.16	UHRF1BP1	11.5252	13.5647	13.0104	11.317	10.0191	11.6096	ENSG00000065060.16	UHRF1BP1	chr6:34792014-34888089	MB468_CTRL	MB468_W2	OK	12.7001	10.9819	-0.209716	-1.06151	0.0664	0.181186	no
ENSG00000065135.9	GNAI3	10.9714	11.6374	12.1537	7.28688	7.1349	7.49416	ENSG00000065135.9	GNAI3	chr1:109548610-109632051	MB468_CTRL	MB468_W2	OK	11.5875	7.30532	-0.665554	-0.810792	0.04005	0.124399	no
ENSG00000065150.18	IPO5	97.5272	103.135	104.689	80.0391	68.4488	76.1949	ENSG00000065150.18	IPO5	chr13:97953657-98024297	MB468_CTRL	MB468_W2	OK	101.784	74.8942	-0.44258	-1.28185	0.0156	0.0599529	no
ENSG00000065154.11	OAT	83.9037	86.3317	89.0788	61.3778	55.6666	64.9112	ENSG00000065154.11	OAT	chr10:124397302-124418976	MB468_CTRL	MB468_W2	OK	86.438	60.6519	-0.511114	-2.48275	5e-05	0.000470501	yes
ENSG00000065183.15	WDR3	22.8215	26.2926	22.3376	17.2142	25.0734	13.75	ENSG00000065183.15	WDR3	chr1:117929719-118185223	MB468_CTRL	MB468_W2	OK	23.8172	18.6792	-0.350573	-0.860653	0.12845	0.288566	no
ENSG00000065243.19	PKN2	44.265	42.5914	45.0113	33.8544	37.6164	40.7787	ENSG00000065243.19	PKN2	chr1:88537512-88836255	MB468_CTRL	MB468_W2	OK	43.9559	37.4165	-0.232383	-0.740343	0.1814	0.365432	no
ENSG00000065268.10	WDR18	21.7499	26.9879	30.7455	19.9266	21.579	30.9529	ENSG00000065268.10	WDR18	chr19:984270-998438	MB468_CTRL	MB468_W2	OK	26.4945	24.1528	-0.1335	-0.399768	0.4485	0.648766	no
ENSG00000065308.4	TRAM2	8.46991	8.50269	9.0438	9.952	11.7509	10.5852	ENSG00000065308.4	TRAM2	chr6:52361420-52576915	MB468_CTRL	MB468_W2	OK	8.67213	10.7627	0.311582	1.55083	0.0077	0.0341011	yes
ENSG00000065320.8	NTN1	5.08866	5.1115	5.26173	3.86031	2.64689	3.71181	ENSG00000065320.8	NTN1	chr17:9021541-9244000	MB468_CTRL	MB468_W2	OK	5.15396	3.40634	-0.597461	-1.76012	0.0011	0.00698981	yes
ENSG00000065325.12	GLP2R	0	0.723797	0.17734	0.454767	0.934011	0.558257	ENSG00000065325.12	GLP2R	chr17:9822205-9892102	MB468_CTRL	MB468_W2	NOTEST	0.300379	0.649011	1.11146	0	1	1	no
ENSG00000065328.16	MCM10	9.80162	9.92572	9.83263	4.64139	5.958	7.15126	ENSG00000065328.16	MCM10	chr10:13161553-13211104	MB468_CTRL	MB468_W2	OK	9.85332	5.91688	-0.735773	-1.80805	0.0011	0.00698981	yes
ENSG00000065357.19	DGKA	2.39434	3.4161	1.56351	4.18501	8.84718	9.46313	ENSG00000065357.19	DGKA	chr12:55901412-55954027	MB468_CTRL	MB468_W2	OK	2.45798	7.49844	1.60911	0.803425	5e-05	0.000470501	yes
ENSG00000065361.14	ERBB3	14.7509	17.309	14.7741	33.0435	32.1607	36.282	ENSG00000065361.14	ERBB3	chr12:56079856-56113907	MB468_CTRL	MB468_W2	OK	15.6113	33.8287	1.11566	1.48508	0.00435	0.0215222	yes
ENSG00000065371.17	ROPN1	1.517	1.54504	2.14169	2.37796	2.50091	3.81131	ENSG00000065371.17	ROPN1	chr3:123968520-123992178	MB468_CTRL	MB468_W2	OK	1.73457	2.89673	0.739842	0.602537	0.0537	0.154855	no
ENSG00000065413.17	ANKRD44	3.0624	2.06474	5.51968	0.256211	2.31962	2.95358	ENSG00000065413.17	ANKRD44	chr2:196967016-197311173	MB468_CTRL	MB468_W2	OK	3.54894	1.84313	-0.945226	-0.403105	0.11045	0.260185	no
ENSG00000065427.14	KARS	111.587	127.535	136.581	78.7347	104.209	97.9189	ENSG00000065427.14	KARS	chr16:75627473-75761872	MB468_CTRL	MB468_W2	OK	125.235	93.6209	-0.41973	-1.46748	0.01975	0.0720849	no
ENSG00000065457.10	ADAT1	42.0935	41.1065	47.2356	44.9094	50.9883	44.4383	ENSG00000065457.10	ADAT1	chr16:75528531-75623300	MB468_CTRL	MB468_W2	OK	43.4785	46.7787	0.105548	0.245494	0.669	0.81579	no
ENSG00000065485.18	PDIA5	3.07026	4.34252	4.22647	3.03493	1.51328	4.11553	ENSG00000065485.18	PDIA5	chr3:123067061-123274130	MB468_CTRL	MB468_W2	OK	3.87975	2.88791	-0.425938	-0.20212	0.4612	0.659407	no
ENSG00000065491.8	TBC1D22B	6.59176	7.16627	7.63965	6.59291	6.70646	6.8581	ENSG00000065491.8	TBC1D22B	chr6:37212179-37332970	MB468_CTRL	MB468_W2	OK	7.13256	6.71916	-0.0861389	-0.335144	0.5619	0.738587	no
ENSG00000065518.7	NDUFB4	85.6238	75.7805	78.8735	49.8809	69.879	74.719	ENSG00000065518.7	NDUFB4	chr3:120596308-120602500	MB468_CTRL	MB468_W2	OK	80.0926	64.8263	-0.30509	-1.2159	0.03145	0.103661	no
ENSG00000065526.10	SPEN	12.0478	14.6894	13.8485	15.3051	16.6123	16.7991	ENSG00000065526.10	SPEN	chr1:15834473-15940460	MB468_CTRL	MB468_W2	OK	13.5286	16.2389	0.263439	0.645547	0.21445	0.407424	no
ENSG00000065534.18	MYLK	2.67234	3.77095	1.94762	2.88353	3.7657	4.62343	ENSG00000065534.18	MYLK	chr3:123585541-123884331	MB468_CTRL	MB468_W2	OK	2.79697	3.75755	0.425928	0.290248	0.3149	0.522604	no
ENSG00000065548.17	ZC3H15	46.5203	57.6103	54.1624	46.1338	35.5663	56.3479	ENSG00000065548.17	ZC3H15	chr2:186486155-186509363	MB468_CTRL	MB468_W2	OK	52.7643	46.016	-0.197428	-0.576314	0.28915	0.495323	no
ENSG00000065559.14	MAP2K4	10.9091	13.0671	13.2749	12.9463	12.4394	14.6513	ENSG00000065559.14	MAP2K4	chr17:11998352-12143830	MB468_CTRL	MB468_W2	OK	12.417	13.3457	0.104049	0.207263	0.6516	0.803663	no
ENSG00000065600.12	TMEM206	8.36526	11.2812	10.8698	7.27374	9.27803	16.1459	ENSG00000065600.12	TMEM206	chr1:212363930-212414901	MB468_CTRL	MB468_W2	OK	10.1721	10.8992	0.0996116	0.225077	0.66375	0.812062	no
ENSG00000065609.14	SNAP91	0	0	0	0	0	0	ENSG00000065609.14	SNAP91	chr6:83552879-83709691	MB468_CTRL	MB468_W2	NOTEST	0	0	0	0	1	1	no
ENSG00000065613.13	SLK	12.297	12.4416	12.2228	8.02812	8.46718	9.15064	ENSG00000065613.13	SLK	chr10:103967200-104029233	MB468_CTRL	MB468_W2	OK	12.3205	8.54865	-0.527287	-2.87	5e-05	0.000470501	yes
ENSG00000065615.13	CYB5R4	21.3911	23.4701	20.803	28.2283	13.827	24.9493	ENSG00000065615.13	CYB5R4	chr6:83859642-83967424	MB468_CTRL	MB468_W2	OK	21.8881	22.3349	0.0291528	0.0708326	0.90025	0.951743	no
ENSG00000065618.17	COL17A1	0.100224	0.559144	0.120423	0.0596181	1.09604	0.280237	ENSG00000065618.17	COL17A1	chr10:104031285-104086002	MB468_CTRL	MB468_W2	NOTEST	0.25993	0.478632	0.880793	0	1	1	no
ENSG00000065621.14	GSTO2	0	0.576282	0.395677	0	0	0.573719	ENSG00000065621.14	GSTO2	chr10:104268872-104304945	MB468_CTRL	MB468_W2	NOTEST	0.323987	0.19124	-0.760552	0	1	1	no
ENSG00000065665.20	SEC61A2	2.90851	3.78675	4.50415	1.22823	3.91653	5.46513	ENSG00000065665.20	SEC61A2	chr10:12129636-12250589	MB468_CTRL	MB468_W2	OK	3.73314	3.53663	-0.078014	-0.0460485	0.88505	0.944388	no
ENSG00000065675.14	PRKCQ	2.1497	1.65429	2.28326	0.973143	1.59386	1.37134	ENSG00000065675.14	PRKCQ	chr10:6427142-6580301	MB468_CTRL	MB468_W2	NOTEST	2.02908	1.31278	-0.628202	0	1	1	no
ENSG00000065717.14	TLE2	7.02727	11.0585	12.0641	9.28864	13.0069	24.1425	ENSG00000065717.14	TLE2	chr19:2997637-3047635	MB468_CTRL	MB468_W2	OK	10.0499	15.4794	0.623158	0.974269	0.01805	0.0671575	no
ENSG00000065802.11	ASB1	12.0441	15.1452	15.3088	10.1836	13.9687	25.127	ENSG00000065802.11	ASB1	chr2:238426741-238452250	MB468_CTRL	MB468_W2	OK	14.166	16.4265	0.213584	0.354024	0.5239	0.709529	no
ENSG00000065809.13	FAM107B	12.2414	12.359	15.5616	10.9337	14.2887	32.4208	ENSG00000065809.13	FAM107B	chr10:14518556-14774897	MB468_CTRL	MB468_W2	OK	13.3873	19.2144	0.521319	0.694502	0.12855	0.288737	no
ENSG00000065833.8	ME1	27.8214	29.281	28.744	19.1087	21.7618	22.1837	ENSG00000065833.8	ME1	chr6:83210388-83431071	MB468_CTRL	MB468_W2	OK	28.6155	21.0181	-0.445166	-2.8874	5e-05	0.000470501	yes
ENSG00000065882.15	TBC1D1	29.166	51.6215	48.5784	37.0197	31.4025	32.539	ENSG00000065882.15	TBC1D1	chr4:37891086-38139175	MB468_CTRL	MB468_W2	OK	43.1219	33.6537	-0.357656	-0.721467	0.18055	0.36416	no
ENSG00000065883.14	CDK13	22.6009	19.8129	25.7051	26.0765	19.7893	23.2404	ENSG00000065883.14	CDK13	chr7:39950036-40097134	MB468_CTRL	MB468_W2	OK	22.7063	23.0354	0.0207604	0.0798978	0.89155	0.947435	no
ENSG00000065911.11	MTHFD2	78.9489	78.1946	89.9909	45.3469	63.0347	65.7434	ENSG00000065911.11	MTHFD2	chr2:74198561-74421662	MB468_CTRL	MB468_W2	OK	82.3781	58.0417	-0.505172	-1.52649	0.00885	0.038085	yes
ENSG00000065923.9	SLC9A7	18.3762	20.0372	19.4154	17.9243	17.8944	18.4354	ENSG00000065923.9	SLC9A7	chrX:46599251-46759172	MB468_CTRL	MB468_W2	OK	19.2763	18.0847	-0.0920578	-0.278605	0.6049	0.770702	no
ENSG00000065970.8	FOXJ2	8.01277	8.12054	8.18848	7.25901	10.0644	7.94943	ENSG00000065970.8	FOXJ2	chr12:8032702-8055503	MB468_CTRL	MB468_W2	OK	8.10726	8.42429	0.0553395	0.216713	0.68295	0.825044	no
ENSG00000065978.18	YBX1	468.745	506.747	566.683	290.881	316.133	363.453	ENSG00000065978.18	YBX1	chr1:42682426-42702349	MB468_CTRL	MB468_W2	OK	514.058	323.489	-0.668216	-3.94438	5e-05	0.000470501	yes
ENSG00000065989.15	PDE4A	1.0454	1.26998	1.44963	0.72116	1.96223	1.56338	ENSG00000065989.15	PDE4A	chr19:10391133-10469631	MB468_CTRL	MB468_W2	NOTEST	1.255	1.41559	0.173713	0	1	1	no
ENSG00000066027.11	PPP2R5A	25.0783	28.2143	25.2217	16.0665	16.237	19.7213	ENSG00000066027.11	PPP2R5A	chr1:212285536-212361863	MB468_CTRL	MB468_W2	OK	26.1714	17.3416	-0.593755	-2.94183	5e-05	0.000470501	yes
ENSG00000066032.18	CTNNA2	0	0	0	0	0	0	ENSG00000066032.18	CTNNA2	chr2:79157002-80648861	MB468_CTRL	MB468_W2	NOTEST	0	0	0	0	1	1	no
ENSG00000066044.14	ELAVL1	54.8803	61.5341	67.2062	40.0806	28.801	52.1294	ENSG00000066044.14	ELAVL1	chr19:7958578-8005659	MB468_CTRL	MB468_W2	OK	61.2069	40.337	-0.60159	-3.01245	5e-05	0.000470501	yes
ENSG00000066056.13	TIE1	0	0	0.0697768	0	0	0	ENSG00000066056.13	TIE1	chr1:43300992-43323108	MB468_CTRL	MB468_W2	NOTEST	0.0232589	0	#NAME?	0	1	1	no
ENSG00000066084.12	DIP2B	10.1624	10.5048	10.0457	7.85508	6.57722	7.00257	ENSG00000066084.12	DIP2B	chr12:50504984-50748667	MB468_CTRL	MB468_W2	OK	10.2376	7.14496	-0.518887	-1.80541	0.00055	0.00392573	yes
ENSG00000066117.14	SMARCD1	16.7335	17.6462	15.1305	27.2747	17.2931	22.7929	ENSG00000066117.14	SMARCD1	chr12:50084971-50100712	MB468_CTRL	MB468_W2	OK	16.5034	22.4536	0.444182	1.04026	0.04505	0.135944	no
ENSG00000066135.12	KDM4A	8.96171	12.8044	10.6177	12.3427	18.5153	11.097	ENSG00000066135.12	KDM4A	chr1:43650157-43931165	MB468_CTRL	MB468_W2	OK	10.7946	13.985	0.373572	0.624264	0.22395	0.419022	no
ENSG00000066136.20	NFYC	54.7296	71.2977	74.0618	56.7397	52.2036	62.2849	ENSG00000066136.20	NFYC	chr1:40690379-40771603	MB468_CTRL	MB468_W2	OK	66.6964	57.0761	-0.224722	-0.887963	0.1	0.242761	no
ENSG00000066185.12	ZMYND12	0	0.138384	0	0	0	2.52256	ENSG00000066185.12	ZMYND12	chr1:42430328-42654664	MB468_CTRL	MB468_W2	NOTEST	0.046128	0.840854	4.18814	0	1	1	no
ENSG00000066230.10	SLC9A3	0	0	0	0	0	0	ENSG00000066230.10	SLC9A3	chr5:473235-524332	MB468_CTRL	MB468_W2	NOTEST	0	0	0	0	1	1	no
ENSG00000066248.14	NGEF	4.81573	4.33849	6.17612	4.23715	3.97269	1.67591	ENSG00000066248.14	NGEF	chr2:232697298-233015885	MB468_CTRL	MB468_W2	OK	5.11011	3.29525	-0.632967	-0.569066	0.1648	0.342263	no
ENSG00000066279.16	ASPM	24.7855	21.7154	22.6267	21.4593	27.3866	22.5919	ENSG00000066279.16	ASPM	chr1:197084127-197146694	MB468_CTRL	MB468_W2	OK	23.0425	23.8126	0.0474266	0.276703	0.6342	0.791875	no
ENSG00000066294.14	CD84	0	0	0	0	0	0	ENSG00000066294.14	CD84	chr1:160537072-160579516	MB468_CTRL	MB468_W2	NOTEST	0	0	0	0	1	1	no
ENSG00000066322.13	ELOVL1	64.1985	76.4735	51.1116	64.2803	72.6079	46.8354	ENSG00000066322.13	ELOVL1	chr1:43363396-43368074	MB468_CTRL	MB468_W2	OK	63.9279	61.2412	-0.0619426	-0.245615	0.6314	0.789894	no
ENSG00000066336.11	SPI1	0.310544	0.157236	0.154601	0	0	0	ENSG00000066336.11	SPI1	chr11:47354859-47378576	MB468_CTRL	MB468_W2	NOTEST	0.20746	0	#NAME?	0	1	1	no
ENSG00000066379.14	ZNRD1	10.3758	12.4182	13.6799	16.4199	18.8024	17.9926	ENSG00000066379.14	ZNRD1	chr6:30001010-30064909	MB468_CTRL	MB468_W2	OK	12.1579	17.7383	0.544969	1.17247	0.0363	0.115522	no
ENSG00000066382.16	MPPED2	0	0	0	0	0	0	ENSG00000066382.16	MPPED2	chr11:30384492-30630508	MB468_CTRL	MB468_W2	NOTEST	0	0	0	0	1	1	no
ENSG00000066405.12	CLDN18	0	0	0	0	0	0	ENSG00000066405.12	CLDN18	chr3:137998734-138033655	MB468_CTRL	MB468_W2	NOTEST	0	0	0	0	1	1	no
ENSG00000066422.4	ZBTB11	11.1883	11.624	11.307	15.7302	14.5678	15.8609	ENSG00000066422.4	ZBTB11	chr3:101648888-101679217	MB468_CTRL	MB468_W2	OK	11.3731	15.3863	0.436025	1.67992	0.00365	0.0186739	yes
ENSG00000066427.21	ATXN3	8.98421	7.15629	8.64605	8.3762	11.9041	7.49556	ENSG00000066427.21	ATXN3	chr14:91965990-92106621	MB468_CTRL	MB468_W2	OK	8.26218	9.25861	0.164273	0.214844	0.506	0.695698	no
ENSG00000066455.12	GOLGA5	6.34531	8.23925	7.23415	6.76875	6.2223	4.49424	ENSG00000066455.12	GOLGA5	chr14:92794230-92839963	MB468_CTRL	MB468_W2	OK	7.27291	5.82843	-0.319425	-0.754568	0.13485	0.298425	no
ENSG00000066468.21	FGFR2	3.92981	5.56969	4.4453	1.769	4.09106	2.8814	ENSG00000066468.21	FGFR2	chr10:121478333-121598458	MB468_CTRL	MB468_W2	OK	4.64827	2.91382	-0.673783	-0.722184	0.0224	0.0795779	no
ENSG00000066557.5	LRRC40	15.189	16.2583	16.2864	13.7293	12.0264	15.6268	ENSG00000066557.5	LRRC40	chr1:69568397-70205620	MB468_CTRL	MB468_W2	OK	15.9113	13.7941	-0.205991	-0.969384	0.0925	0.22968	no
ENSG00000066583.11	ISOC1	24.371	21.0982	26.1872	12.4667	22.1644	15.4996	ENSG00000066583.11	ISOC1	chr5:129094750-129114028	MB468_CTRL	MB468_W2	OK	23.8855	16.7103	-0.515399	-1.29174	0.0318	0.104523	no
ENSG00000066629.16	EML1	1.14711	0.797223	0.799372	0	0.969674	0.102376	ENSG00000066629.16	EML1	chr14:99737692-99942060	MB468_CTRL	MB468_W2	NOTEST	0.914569	0.35735	-1.35575	0	1	1	no
ENSG00000066651.17	TRMT11	10.695	13.3108	13.7145	19.6099	18.8078	22.8375	ENSG00000066651.17	TRMT11	chr6:125986429-126039276	MB468_CTRL	MB468_W2	OK	12.5734	20.4184	0.699493	1.15773	0.0164	0.0623346	no
ENSG00000066654.13	THUMPD1	20.2181	18.5915	20.1982	10.7323	14.2579	17.7743	ENSG00000066654.13	THUMPD1	chr16:20610242-20925006	MB468_CTRL	MB468_W2	OK	19.6693	14.2548	-0.464494	-1.61473	0.00895	0.0384116	yes
ENSG00000066697.14	MSANTD3	16.3369	16.3185	18.8132	17.4778	12.2517	15.6246	ENSG00000066697.14	MSANTD3	chr9:100427155-100577636	MB468_CTRL	MB468_W2	OK	17.1562	15.118	-0.182458	-0.57106	0.30655	0.513631	no
ENSG00000066735.14	KIF26A	0.0447039	0.0478891	0.0945817	0.31547	0	0	ENSG00000066735.14	KIF26A	chr14:104138722-104180894	MB468_CTRL	MB468_W2	NOTEST	0.0623915	0.105157	0.753118	0	1	1	no
ENSG00000066739.11	ATG2B	1.69089	1.9871	2.54277	2.98995	1.93141	2.68514	ENSG00000066739.11	ATG2B	chr14:96279201-96387288	MB468_CTRL	MB468_W2	NOTEST	2.07359	2.5355	0.290141	0	1	1	no
ENSG00000066777.8	ARFGEF1	14.3701	14.4016	14.5714	10.4764	8.18599	12.0765	ENSG00000066777.8	ARFGEF1	chr8:66964098-67343677	MB468_CTRL	MB468_W2	OK	14.4477	10.2463	-0.49574	-0.972746	0.0803	0.207659	no
ENSG00000066813.14	ACSM2B	0	0	0	0	0	0	ENSG00000066813.14	ACSM2B	chr16:20536225-20576427	MB468_CTRL	MB468_W2	NOTEST	0	0	0	0	1	1	no
ENSG00000066827.15	ZFAT	4.3332	5.10649	4.44147	5.228	6.37927	3.88084	ENSG00000066827.15	ZFAT	chr8:134477787-134713049	MB468_CTRL	MB468_W2	OK	4.62705	5.16271	0.158034	0.195822	0.62415	0.785023	no
ENSG00000066855.15	MTFR1	19.6437	18.8271	22.5433	15.579	14.6705	15.6364	ENSG00000066855.15	MTFR1	chr8:65644733-65842322	MB468_CTRL	MB468_W2	OK	20.338	15.2953	-0.411092	-1.13275	0.0178	0.0663756	no
ENSG00000066923.17	STAG3	0	0.0527472	0.110023	0.255636	0	0.460366	ENSG00000066923.17	STAG3	chr7:100177562-100272218	MB468_CTRL	MB468_W2	NOTEST	0.0542569	0.238667	2.13712	0	1	1	no
ENSG00000066926.10	FECH	12.5592	8.75744	9.94177	8.19291	10.2367	7.64157	ENSG00000066926.10	FECH	chr18:57548282-57586772	MB468_CTRL	MB468_W2	OK	10.4195	8.6904	-0.261785	-0.37435	0.3914	0.596738	no
ENSG00000066933.15	MYO9A	10.6686	13.5528	10.6067	14.8969	13.4213	9.28883	ENSG00000066933.15	MYO9A	chr15:71818395-72155459	MB468_CTRL	MB468_W2	OK	11.6094	12.5357	0.110752	0.171009	0.71685	0.84722	no
ENSG00000067048.16	DDX3Y	0	0.045851	0	0	0	0	ENSG00000067048.16	DDX3Y	chrY:12904107-12920478	MB468_CTRL	MB468_W2	NOTEST	0.0152837	0	#NAME?	0	1	1	no
ENSG00000067057.16	PFKP	27.295	33.5706	33.4768	29.315	32.1968	33.7903	ENSG00000067057.16	PFKP	chr10:3066332-3172841	MB468_CTRL	MB468_W2	OK	31.4475	31.7673	0.0146007	0.0413504	0.9349	0.968594	no
ENSG00000067064.10	IDI1	79.9618	86.4469	84.3225	38.2931	48.6635	46.4594	ENSG00000067064.10	IDI1	chr10:971145-1049170	MB468_CTRL	MB468_W2	OK	83.5771	44.472	-0.910211	-3.5698	5e-05	0.000470501	yes
ENSG00000067066.16	SP100	8.10076	6.17472	7.6989	5.73845	3.83805	5.25344	ENSG00000067066.16	SP100	chr2:230415941-230580006	MB468_CTRL	MB468_W2	OK	7.32479	4.94332	-0.567309	-0.530621	0.1567	0.330477	no
ENSG00000067082.14	KLF6	28.8638	33.259	31.6689	23.444	27.1848	26.495	ENSG00000067082.14	KLF6	chr10:3775995-3785281	MB468_CTRL	MB468_W2	OK	31.2639	25.7079	-0.282285	-1.24626	0.02815	0.0952857	no
ENSG00000067113.16	PLPP1	3.56469	3.77393	2.5379	2.06115	5.35017	8.23391	ENSG00000067113.16	PLPP1	chr5:55307759-55535050	MB468_CTRL	MB468_W2	OK	3.29217	5.21508	0.663649	0.441258	0.27925	0.484019	no
ENSG00000067141.16	NEO1	6.37787	8.01092	6.16021	4.99426	5.59323	2.0869	ENSG00000067141.16	NEO1	chr15:73051709-73305206	MB468_CTRL	MB468_W2	OK	6.84967	4.2248	-0.697152	-0.628243	0.12685	0.286023	no
ENSG00000067167.7	TRAM1	67.5895	62.8874	67.7144	67.1862	65.7266	49.8274	ENSG00000067167.7	TRAM1	chr8:70573441-70608387	MB468_CTRL	MB468_W2	OK	66.0638	60.9134	-0.117099	-0.537101	0.3429	0.551299	no
ENSG00000067177.14	PHKA1	5.36318	5.93291	6.20516	3.92678	4.40058	3.77263	ENSG00000067177.14	PHKA1	chrX:72578813-72714319	MB468_CTRL	MB468_W2	OK	5.83375	4.03333	-0.532452	-2.13408	0.0004	0.00299751	yes
ENSG00000067182.7	TNFRSF1A	33.3581	40.6202	26.3358	32.5275	41.3197	45.1117	ENSG00000067182.7	TNFRSF1A	chr12:6328756-6342114	MB468_CTRL	MB468_W2	OK	33.4381	39.653	0.245938	0.596069	0.2675	0.470055	no
ENSG00000067191.15	CACNB1	0.26245	0.477477	1.04259	3.89981	6.89634	7.77122	ENSG00000067191.15	CACNB1	chr17:39173289-39197703	MB468_CTRL	MB468_W2	OK	0.594172	6.18912	3.38078	0.947202	5e-05	0.000470501	yes
ENSG00000067208.14	EVI5	16.0502	15.8087	14.0331	10.9268	15.3491	9.73481	ENSG00000067208.14	EVI5	chr1:92508695-92792404	MB468_CTRL	MB468_W2	OK	15.2973	12.0036	-0.349817	-0.471346	0.34065	0.549248	no
ENSG00000067221.13	STOML1	0.998574	1.72203	0.837088	1.16234	0.565608	1.07676	ENSG00000067221.13	STOML1	chr15:73978922-73994622	MB468_CTRL	MB468_W2	NOTEST	1.1859	0.934902	-0.343093	0	1	1	no
ENSG00000067225.17	PKM	485.587	545.042	546.718	283.771	307.451	393.364	ENSG00000067225.17	PKM	chr15:72199028-72231822	MB468_CTRL	MB468_W2	OK	525.782	328.195	-0.679911	-3.46282	5e-05	0.000470501	yes
ENSG00000067248.9	DHX29	11.0611	8.82514	9.22953	9.3101	4.3371	7.39672	ENSG00000067248.9	DHX29	chr5:55233933-55307722	MB468_CTRL	MB468_W2	OK	9.70527	7.01464	-0.468399	-1.04852	0.05885	0.165857	no
ENSG00000067334.13	DNTTIP2	47.9334	48.6221	52.3315	37.6494	48.4819	34.933	ENSG00000067334.13	DNTTIP2	chr1:93866282-93879918	MB468_CTRL	MB468_W2	OK	49.629	40.3548	-0.298445	-1.13197	0.0581	0.164223	no
ENSG00000067365.14	METTL22	3.25701	5.40361	2.16295	14.2526	15.5207	21.0643	ENSG00000067365.14	METTL22	chr16:8621682-8649654	MB468_CTRL	MB468_W2	OK	3.60786	16.9459	2.23172	1.73667	5e-05	0.000470501	yes
ENSG00000067369.13	TP53BP1	7.21135	9.35123	8.25124	10.0047	9.27627	23.1872	ENSG00000067369.13	TP53BP1	chr15:43358171-43510728	MB468_CTRL	MB468_W2	OK	8.27127	14.1561	0.775238	1.09806	0.03465	0.111452	no
ENSG00000067445.20	TRO	0	0	0	0	0	0	ENSG00000067445.20	TRO	chrX:54920461-54931431	MB468_CTRL	MB468_W2	NOTEST	0	0	0	0	1	1	no
ENSG00000067533.5	RRP15	12.0902	11.6844	12.3632	10.2461	7.3776	7.62555	ENSG00000067533.5	RRP15	chr1:218285286-218337983	MB468_CTRL	MB468_W2	OK	12.0459	8.41643	-0.517267	-1.29635	0.02915	0.0979201	no
ENSG00000067560.10	RHOA	200.553	218.916	214.875	128.63	143.844	146.692	ENSG00000067560.10	RHOA	chr3:49359144-49416475	MB468_CTRL	MB468_W2	OK	211.448	139.722	-0.597741	-3.73782	5e-05	0.000470501	yes
ENSG00000067596.10	DHX8	8.7383	9.24497	10.0884	11.6388	5.6656	10.5748	ENSG00000067596.10	DHX8	chr17:43483864-43610338	MB468_CTRL	MB468_W2	OK	9.35722	9.29308	-0.00992405	-0.0114839	0.981	0.990918	no
ENSG00000067601.7	PMS2P4	4.08031	2.27955	2.35487	1.74959	6.95379	3.47874	ENSG00000067601.7	PMS2P4	chr7:67295607-67321526	MB468_CTRL	MB468_W2	OK	2.90491	4.06071	0.483238	0.379357	0.52255	0.708434	no
ENSG00000067606.16	PRKCZ	8.07536	7.81357	8.19205	14.1391	19.1555	3.53205	ENSG00000067606.16	PRKCZ	chr1:2050469-2220738	MB468_CTRL	MB468_W2	OK	8.027	12.2756	0.612856	0.669531	0.1039	0.249142	no
ENSG00000067646.11	ZFY	0	0	0	0	0	0	ENSG00000067646.11	ZFY	chrY:2935280-3002626	MB468_CTRL	MB468_W2	NOTEST	0	0	0	0	1	1	no
ENSG00000067704.9	IARS2	52.8714	56.3245	54.9778	31.7423	30.0248	37.0083	ENSG00000067704.9	IARS2	chr1:220094101-220148041	MB468_CTRL	MB468_W2	OK	54.7245	32.9251	-0.732999	-3.20025	5e-05	0.000470501	yes
ENSG00000067715.13	SYT1	0	0.0367116	0.245788	0	0	0	ENSG00000067715.13	SYT1	chr12:78863992-79503396	MB468_CTRL	MB468_W2	NOTEST	0.0941667	0	#NAME?	0	1	1	no
ENSG00000067798.14	NAV3	0	0	0	0.0684046	0	0	ENSG00000067798.14	NAV3	chr12:77324640-78213008	MB468_CTRL	MB468_W2	NOTEST	0	0.0228015	inf	0	1	1	no
ENSG00000067829.18	IDH3G	49.1374	59.2565	53.6297	43.9808	46.6711	66.266	ENSG00000067829.18	IDH3G	chrX:153785765-153798505	MB468_CTRL	MB468_W2	OK	54.0079	52.306	-0.0461931	-0.159469	0.7633	0.876319	no
ENSG00000067836.12	ROGDI	0	0	0	0	0	0	ENSG00000067836.12	ROGDI	chr16:4796967-4802950	MB468_CTRL	MB468_W2	NOTEST	0	0	0	0	1	1	no
ENSG00000067840.12	PDZD4	1.33833	0.507619	0.703213	0.455633	0.567159	0	ENSG00000067840.12	PDZD4	chrX:153802165-153830565	MB468_CTRL	MB468_W2	NOTEST	0.849722	0.340931	-1.31751	0	1	1	no
ENSG00000067842.17	ATP2B3	0	0	0	0	0	0	ENSG00000067842.17	ATP2B3	chrX:153517675-153582939	MB468_CTRL	MB468_W2	NOTEST	0	0	0	0	1	1	no
ENSG00000067900.7	ROCK1	16.2262	20.3046	16.7477	14.939	14.6112	12.9756	ENSG00000067900.7	ROCK1	chr18:20946905-21111851	MB468_CTRL	MB468_W2	OK	17.7595	14.1753	-0.325212	-0.651968	0.18625	0.371628	no
ENSG00000067955.13	CBFB	35.7439	34.3034	38.4673	28.4897	32.6729	21.246	ENSG00000067955.13	CBFB	chr16:67029115-67101058	MB468_CTRL	MB468_W2	OK	36.1715	27.4695	-0.397022	-1.35546	0.0237	0.0832122	no
ENSG00000067992.12	PDK3	17.5449	14.948	16.1653	17.4711	14.3826	14.0245	ENSG00000067992.12	PDK3	chrX:24465220-24539837	MB468_CTRL	MB468_W2	OK	16.2194	15.2927	-0.0848725	-0.245923	0.63125	0.789833	no
ENSG00000068001.13	HYAL2	17.1768	15.8046	16.794	7.36714	9.02509	12.8673	ENSG00000068001.13	HYAL2	chr3:50317789-50328251	MB468_CTRL	MB468_W2	OK	16.5918	9.75319	-0.766527	-1.40601	0.00495	0.0238689	yes
ENSG00000068024.16	HDAC4	15.1546	19.9139	18.2553	9.41927	12.3503	5.70633	ENSG00000068024.16	HDAC4	chr2:239048167-239402364	MB468_CTRL	MB468_W2	OK	17.7746	9.15862	-0.956614	-1.37756	0.00225	0.0125789	yes
ENSG00000068028.17	RASSF1	20.9045	17.6759	19.1329	22.3631	18.5442	17.6035	ENSG00000068028.17	RASSF1	chr3:50329781-50340980	MB468_CTRL	MB468_W2	OK	19.2378	19.5036	0.0197987	0.0815537	0.87905	0.941576	no
ENSG00000068078.17	FGFR3	0.690194	1.36349	0.956744	1.02581	0.804203	0.777347	ENSG00000068078.17	FGFR3	chr4:1793306-1808872	MB468_CTRL	MB468_W2	NOTEST	1.00348	0.869121	-0.207375	0	1	1	no
ENSG00000068079.7	IFI35	4.77382	3.84536	5.213	2.01426	3.32442	9.44828	ENSG00000068079.7	IFI35	chr17:43006724-43014456	MB468_CTRL	MB468_W2	OK	4.61073	4.92899	0.0962971	0.0872164	0.82965	0.914591	no
ENSG00000068097.14	HEATR6	2.89475	6.00487	7.04795	6.76025	12.8921	5.82127	ENSG00000068097.14	HEATR6	chr17:60043193-60078931	MB468_CTRL	MB468_W2	OK	5.31586	8.49121	0.675668	0.577561	0.1548	0.327639	no
ENSG00000068120.14	COASY	22.7872	28.3432	22.7929	26.1492	28.9921	35.2571	ENSG00000068120.14	COASY	chr17:42536171-42566277	MB468_CTRL	MB468_W2	OK	24.6411	30.1328	0.290267	0.539239	0.2983	0.505259	no
ENSG00000068137.14	PLEKHH3	6.00436	9.75873	9.05707	11.102	13.0705	14.7423	ENSG00000068137.14	PLEKHH3	chr17:42667913-42676994	MB468_CTRL	MB468_W2	OK	8.27339	12.9716	0.648807	1.4418	0.00655	0.0299788	yes
ENSG00000068305.17	MEF2A	20.3632	26.7541	20.4326	33.2958	14.4876	22.9451	ENSG00000068305.17	MEF2A	chr15:99565416-99733561	MB468_CTRL	MB468_W2	OK	22.5166	23.5762	0.0663364	0.139894	0.79985	0.897752	no
ENSG00000068308.13	OTUD5	18.4274	22.4489	21.7449	13.6664	23.9928	25.7849	ENSG00000068308.13	OTUD5	chrX:48922027-48958386	MB468_CTRL	MB468_W2	OK	20.8737	21.148	0.0188355	0.0893666	0.8721	0.93822	no
ENSG00000068323.16	TFE3	17.9009	17.9684	18.6831	26.7112	26.0888	32.2967	ENSG00000068323.16	TFE3	chrX:49028725-49043486	MB468_CTRL	MB468_W2	OK	18.1841	28.3656	0.641461	2.40668	5e-05	0.000470501	yes
ENSG00000068354.15	TBC1D25	3.77351	6.48266	6.7589	5.58725	7.67985	5.5103	ENSG00000068354.15	TBC1D25	chrX:48539456-48562609	MB468_CTRL	MB468_W2	OK	5.67169	6.25913	0.142185	0.253219	0.59865	0.76548	no
ENSG00000068366.19	ACSL4	7.40497	8.08607	10.0204	3.97788	4.39358	5.17637	ENSG00000068366.19	ACSL4	chrX:109623699-109733403	MB468_CTRL	MB468_W2	OK	8.5038	4.51594	-0.91308	-1.25706	0.00055	0.00392573	yes
ENSG00000068383.18	INPP5A	6.5266	6.95888	5.98788	6.72823	4.59484	5.22668	ENSG00000068383.18	INPP5A	chr10:132537819-132786052	MB468_CTRL	MB468_W2	OK	6.49112	5.51658	-0.234692	-0.379213	0.3809	0.587821	no
ENSG00000068394.10	GPKOW	12.769	13.6988	14.4031	8.32895	7.66527	11.0925	ENSG00000068394.10	GPKOW	chrX:49113388-49123801	MB468_CTRL	MB468_W2	OK	13.6237	9.02889	-0.593493	-2.81473	5e-05	0.000470501	yes
ENSG00000068400.13	GRIPAP1	16.1183	17.2928	20.3607	20.705	22.173	24.7996	ENSG00000068400.13	GRIPAP1	chrX:48973719-49002264	MB468_CTRL	MB468_W2	OK	17.9239	22.5592	0.331832	0.938362	0.077	0.201615	no
ENSG00000068438.14	FTSJ1	36.4567	41.4979	40.3432	48.7397	44.0623	38.4708	ENSG00000068438.14	FTSJ1	chrX:48476020-48486364	MB468_CTRL	MB468_W2	OK	39.4326	43.7576	0.150145	0.684994	0.2142	0.407097	no
ENSG00000068489.12	PRR11	22.9919	21.1538	23.4444	16.7609	20.7344	22.1194	ENSG00000068489.12	PRR11	chr17:59155498-59215247	MB468_CTRL	MB468_W2	OK	22.53	19.8716	-0.181142	-0.635882	0.1774	0.359946	no
ENSG00000068615.17	REEP1	8.72215	8.66312	10.7989	7.58024	10.1007	6.13975	ENSG00000068615.17	REEP1	chr2:86213992-86338083	MB468_CTRL	MB468_W2	OK	9.39473	7.94022	-0.242673	-0.295634	0.4393	0.640717	no
ENSG00000068650.18	ATP11A	39.426	36.6629	37.8932	66.1827	57.6802	56.0491	ENSG00000068650.18	ATP11A	chr13:112690328-112887168	MB468_CTRL	MB468_W2	OK	37.994	59.9707	0.658484	1.7292	0.00265	0.0144042	yes
ENSG00000068654.15	POLR1A	14.2796	12.987	11.9481	8.80873	16.1009	17.6776	ENSG00000068654.15	POLR1A	chr2:86020215-86106155	MB468_CTRL	MB468_W2	OK	13.0715	14.1957	0.119028	0.212284	0.6485	0.801836	no
ENSG00000068697.6	LAPTM4A	140.924	157.333	150.984	78.9126	85.3516	93.9983	ENSG00000068697.6	LAPTM4A	chr2:20032649-20052028	MB468_CTRL	MB468_W2	OK	149.747	86.0875	-0.798653	-4.64968	5e-05	0.000470501	yes
ENSG00000068724.15	TTC7A	15.391	14.3725	12.5313	10.1699	13.0216	15.206	ENSG00000068724.15	TTC7A	chr2:46899274-47176601	MB468_CTRL	MB468_W2	OK	14.0983	12.7992	-0.139468	-0.131237	0.751	0.869057	no
ENSG00000068745.14	IP6K2	23.0032	24.6774	23.2607	46.2807	54.6527	37.9741	ENSG00000068745.14	IP6K2	chr3:48688002-48740353	MB468_CTRL	MB468_W2	OK	23.6471	46.3025	0.969426	3.10304	5e-05	0.000470501	yes
ENSG00000068781.21	STON1-GTF2A1L	0	0	0.0048742	0	0.236699	0	ENSG00000068781.21	STON1-GTF2A1L	chr2:48529382-48776517	MB468_CTRL	MB468_W2	NOTEST	0.00162473	0.0788995	5.60174	0	1	1	no
ENSG00000068784.12	SRBD1	8.13522	9.4606	11.0746	4.60309	7.78004	5.55906	ENSG00000068784.12	SRBD1	chr2:45388679-45612165	MB468_CTRL	MB468_W2	OK	9.55681	5.98073	-0.676208	-1.2078	0.0168	0.0634928	no
ENSG00000068796.16	KIF2A	14.2036	12.975	19.0849	10.2195	12.4439	12.4151	ENSG00000068796.16	KIF2A	chr5:62306161-62628582	MB468_CTRL	MB468_W2	OK	15.4212	11.6928	-0.399291	-0.49809	0.2569	0.457972	no
ENSG00000068831.18	RASGRP2	0.308104	0.299656	0.591495	0.319135	2.31391	3.45423	ENSG00000068831.18	RASGRP2	chr11:64726910-64745456	MB468_CTRL	MB468_W2	NOTEST	0.399752	2.02909	2.34366	0	1	1	no
ENSG00000068878.14	PSME4	26.9492	33.0687	30.1936	24.3514	25.0177	24.9014	ENSG00000068878.14	PSME4	chr2:53864066-54305300	MB468_CTRL	MB468_W2	OK	30.0705	24.7568	-0.280524	-0.790306	0.12805	0.287861	no
ENSG00000068885.14	IFT80	14.9813	17.5676	14.8735	17.5211	13.3679	19.969	ENSG00000068885.14	IFT80	chr3:160225635-160485773	MB468_CTRL	MB468_W2	OK	15.8075	16.9527	0.100908	0.0899382	0.81	0.903473	no
ENSG00000068903.19	SIRT2	12.7198	12.494	16.7575	23.3197	19.2557	20.3284	ENSG00000068903.19	SIRT2	chr19:38878554-38908893	MB468_CTRL	MB468_W2	OK	13.9904	20.9679	0.583743	1.43698	0.0044	0.0217197	yes
ENSG00000068912.13	ERLEC1	11.1119	13.4309	15.3945	11.3765	5.46951	15.0157	ENSG00000068912.13	ERLEC1	chr2:53532671-53860160	MB468_CTRL	MB468_W2	OK	13.3125	10.6206	-0.325918	-0.463348	0.37615	0.583364	no
ENSG00000068971.13	PPP2R5B	1.49096	1.5076	2.45151	2.65866	2.64443	5.73458	ENSG00000068971.13	PPP2R5B	chr11:64917552-64935888	MB468_CTRL	MB468_W2	OK	1.81669	3.67922	1.01809	1.00539	0.01105	0.0455676	yes
ENSG00000068976.13	PYGM	0	0.561346	0.102415	1.70113	0	0.254334	ENSG00000068976.13	PYGM	chr11:64746388-64760297	MB468_CTRL	MB468_W2	NOTEST	0.221254	0.651822	1.55878	0	1	1	no
ENSG00000068985.4	PAGE1	0	0	0	0	0	0	ENSG00000068985.4	PAGE1	chrX:49687449-49695993	MB468_CTRL	MB468_W2	NOTEST	0	0	0	0	1	1	no
ENSG00000069011.15	PITX1	75.8979	82.8447	82.5957	59.1466	76.6366	89.5041	ENSG00000069011.15	PITX1	chr5:135027734-135401296	MB468_CTRL	MB468_W2	OK	80.4461	75.0958	-0.099291	-0.281756	0.6155	0.779197	no
ENSG00000069020.18	MAST4	2.28182	1.5382	4.08694	3.04454	1.82877	2.7201	ENSG00000069020.18	MAST4	chr5:66596360-67169595	MB468_CTRL	MB468_W2	OK	2.63565	2.53114	-0.0583745	-0.0257978	0.898	0.950625	no
ENSG00000069122.18	ADGRF5	0.0824338	0.179887	0.161129	0	0.177667	0.0721033	ENSG00000069122.18	ADGRF5	chr6:46852511-46954943	MB468_CTRL	MB468_W2	NOTEST	0.14115	0.0832567	-0.761589	0	1	1	no
ENSG00000069188.16	SDK2	0	0.0480578	0.0974308	0.0894629	0.0560456	0	ENSG00000069188.16	SDK2	chr17:73334383-73644089	MB468_CTRL	MB468_W2	NOTEST	0.0484962	0.0485028	0.000196275	0	1	1	no
ENSG00000069206.15	ADAM7	0	0	0	0	0	0	ENSG00000069206.15	ADAM7	chr8:24294039-24912073	MB468_CTRL	MB468_W2	NOTEST	0	0	0	0	1	1	no
ENSG00000069248.11	NUP133	19.8388	29.2759	25.5787	13.6238	16.0933	17.724	ENSG00000069248.11	NUP133	chr1:229440259-229508341	MB468_CTRL	MB468_W2	OK	24.8978	15.8137	-0.654843	-1.65018	0.00325	0.0170097	yes
ENSG00000069275.12	NUCKS1	191.973	201.726	238.854	87.3167	113.201	105.734	ENSG00000069275.12	NUCKS1	chr1:205712818-205750276	MB468_CTRL	MB468_W2	OK	210.851	102.084	-1.04647	-1.7428	0.0002	0.00163443	yes
ENSG00000069329.15	VPS35	78.5177	74.7922	80.2176	59.4097	71.6183	57.1715	ENSG00000069329.15	VPS35	chr16:46656131-46689518	MB468_CTRL	MB468_W2	OK	77.8425	62.7331	-0.31133	-0.875976	0.11555	0.268267	no
ENSG00000069345.11	DNAJA2	67.1312	75.5558	81.3149	60.4009	55.718	61.8626	ENSG00000069345.11	DNAJA2	chr16:46955361-46973788	MB468_CTRL	MB468_W2	OK	74.6673	59.3272	-0.331784	-1.90668	0.00165	0.00974473	yes
ENSG00000069399.13	BCL3	32.4117	34.8614	32.6485	41.205	59.0493	40.1977	ENSG00000069399.13	BCL3	chr19:44747704-44760044	MB468_CTRL	MB468_W2	OK	33.3072	46.8173	0.491209	1.40059	0.00395	0.0198813	yes
ENSG00000069424.14	KCNAB2	1.10208	5.52634	1.05021	1.06182	2.40308	4.26343	ENSG00000069424.14	KCNAB2	chr1:5862810-6101193	MB468_CTRL	MB468_W2	NOTEST	2.55954	2.57611	0.00930836	0	1	1	no
ENSG00000069431.11	ABCC9	0	0	0	0	0.131845	0	ENSG00000069431.11	ABCC9	chr12:21797400-21942529	MB468_CTRL	MB468_W2	NOTEST	0	0.0439484	inf	0	1	1	no
ENSG00000069482.6	GAL	5.94191	8.84345	8.40111	0	6.13286	7.15606	ENSG00000069482.6	GAL	chr11:68683778-68691175	MB468_CTRL	MB468_W2	OK	7.72882	4.42964	-0.803059	-0.985218	0.2699	0.473025	no
ENSG00000069493.14	CLEC2D	0.144391	0.640615	1.06816	3.77484	2.55078	1.88414	ENSG00000069493.14	CLEC2D	chr12:9664968-9699555	MB468_CTRL	MB468_W2	OK	0.617722	2.73659	2.14735	0.449401	0.00015	0.00126619	yes
ENSG00000069509.5	FUNDC1	13.4053	11.8226	14.0351	16.1176	13.5654	14.4095	ENSG00000069509.5	FUNDC1	chrX:44523638-44543001	MB468_CTRL	MB468_W2	OK	13.0877	14.6975	0.167367	0.600901	0.2977	0.504662	no
ENSG00000069535.13	MAOB	0.233388	0	0.0566182	0	0	0.159143	ENSG00000069535.13	MAOB	chrX:43766610-43882447	MB468_CTRL	MB468_W2	NOTEST	0.0966688	0.0530478	-0.865759	0	1	1	no
ENSG00000069667.15	RORA	0.402093	0.503493	0.33349	0.0671068	0.302863	1.35411	ENSG00000069667.15	RORA	chr15:60479177-61229319	MB468_CTRL	MB468_W2	NOTEST	0.413025	0.574693	0.476561	0	1	1	no
ENSG00000069696.6	DRD4	0.444553	0	0	1.05693	1.48965	0	ENSG00000069696.6	DRD4	chr11:637292-640706	MB468_CTRL	MB468_W2	NOTEST	0.148184	0.848858	2.51813	0	1	1	no
ENSG00000069702.10	TGFBR3	1.1095	1.63143	1.85191	1.45274	2.70043	0.945112	ENSG00000069702.10	TGFBR3	chr1:91680342-91906335	MB468_CTRL	MB468_W2	NOTEST	1.53094	1.69943	0.150627	0	1	1	no
ENSG00000069712.11	KIAA1107	0.179421	0.000154547	0.181408	0.609679	0.90042	0	ENSG00000069712.11	KIAA1107	chr1:92080304-92184725	MB468_CTRL	MB468_W2	NOTEST	0.120328	0.503366	2.06464	0	1	1	no
ENSG00000069764.9	PLA2G10	0	0	0	0	0	0	ENSG00000069764.9	PLA2G10	chr16:14672544-14694669	MB468_CTRL	MB468_W2	NOTEST	0	0	0	0	1	1	no
ENSG00000069812.11	HES2	12.8612	16.1444	11.4892	15.6975	13.8977	17.5509	ENSG00000069812.11	HES2	chr1:6412417-6424670	MB468_CTRL	MB468_W2	OK	13.4982	15.7154	0.219403	0.432977	0.42765	0.630196	no
ENSG00000069849.10	ATP1B3	105.702	101.506	108.566	77.2488	77.7049	75.4747	ENSG00000069849.10	ATP1B3	chr3:141876123-141926514	MB468_CTRL	MB468_W2	OK	105.258	76.8095	-0.454573	-1.84009	0.00075	0.00507364	yes
ENSG00000069869.15	NEDD4	11.2517	10.1331	10.7067	5.89061	3.82927	5.69997	ENSG00000069869.15	NEDD4	chr15:55826921-55993746	MB468_CTRL	MB468_W2	OK	10.6972	5.13995	-1.0574	-2.07455	5e-05	0.000470501	yes
ENSG00000069943.9	PIGB	8.05399	6.93435	2.23155	6.39228	5.53818	2.15785	ENSG00000069943.9	PIGB	chr15:55202965-55508234	MB468_CTRL	MB468_W2	OK	5.73996	4.69611	-0.289576	-0.25202	0.54705	0.727653	no
ENSG00000069956.11	MAPK6	25.3682	23.9969	24.5056	13.1403	14.2085	20.4869	ENSG00000069956.11	MAPK6	chr15:51829627-52100523	MB468_CTRL	MB468_W2	OK	24.6236	15.9452	-0.626919	-1.54541	0.00545	0.0258146	yes
ENSG00000069966.18	GNB5	15.5118	13.8595	13.8988	14.467	16.185	15.2357	ENSG00000069966.18	GNB5	chr15:52115104-52295798	MB468_CTRL	MB468_W2	OK	14.4234	15.2959	0.0847358	0.190046	0.7192	0.848629	no
ENSG00000069974.15	RAB27A	5.723	8.01493	8.434	9.00547	7.84842	2.37361	ENSG00000069974.15	RAB27A	chr15:55202965-55508234	MB468_CTRL	MB468_W2	OK	7.39064	6.40917	-0.205563	-0.233646	0.5653	0.741646	no
ENSG00000069998.12	CECR5	25.521	27.55	29.3178	15.7152	13.6476	17.6565	ENSG00000069998.12	CECR5	chr22:17137510-17165445	MB468_CTRL	MB468_W2	OK	27.463	15.6731	-0.809198	-2.75536	5e-05	0.000470501	yes
ENSG00000070010.18	UFD1L	72.9066	80.0377	77.4834	53.9716	60.0347	58.8888	ENSG00000070010.18	UFD1L	chr22:19330697-19479215	MB468_CTRL	MB468_W2	OK	76.8092	57.6317	-0.414418	-1.06913	0.0634	0.175059	no
ENSG00000070018.8	LRP6	10.992	10.6687	11.3489	10.4786	22.1665	11.9165	ENSG00000070018.8	LRP6	chr12:12049843-12267012	MB468_CTRL	MB468_W2	OK	11.0032	14.8539	0.432916	0.689239	0.16435	0.341735	no
ENSG00000070031.3	SCT	0.815736	0	0	0	0	0	ENSG00000070031.3	SCT	chr11:626430-627143	MB468_CTRL	MB468_W2	NOTEST	0.271912	0	#NAME?	0	1	1	no
ENSG00000070047.11	PHRF1	9.36727	11.344	12.3821	8.20982	8.91986	8.91213	ENSG00000070047.11	PHRF1	chr11:576485-612222	MB468_CTRL	MB468_W2	OK	11.0311	8.6806	-0.345715	-1.37021	0.0199	0.0725097	no
ENSG00000070061.14	IKBKAP	10.4252	11.3407	10.8545	8.89614	9.37481	8.10117	ENSG00000070061.14	IKBKAP	chr9:108867516-108934116	MB468_CTRL	MB468_W2	OK	10.8735	8.79071	-0.306761	-0.826373	0.1283	0.288317	no
ENSG00000070081.15	NUCB2	8.88017	8.70303	8.04497	3.88086	8.44174	4.30042	ENSG00000070081.15	NUCB2	chr11:17208152-17349974	MB468_CTRL	MB468_W2	OK	8.54272	5.541	-0.624549	-0.718954	0.04575	0.137468	no
ENSG00000070087.13	PFN2	20.524	17.5444	19.3226	28.5508	34.4746	32.0518	ENSG00000070087.13	PFN2	chr3:149761104-150225190	MB468_CTRL	MB468_W2	OK	19.1304	31.6924	0.728273	2.18077	5e-05	0.000470501	yes
ENSG00000070159.13	PTPN3	6.49229	7.67573	6.68442	3.79572	10.746	5.78048	ENSG00000070159.13	PTPN3	chr9:109375465-109498313	MB468_CTRL	MB468_W2	OK	6.95081	6.77407	-0.0371576	-0.0874389	0.8574	0.930214	no
ENSG00000070182.18	SPTB	1.55681	1.8432	1.70701	0.836651	1.03203	2.02033	ENSG00000070182.18	SPTB	chr14:64704101-64879883	MB468_CTRL	MB468_W2	NOTEST	1.70234	1.29634	-0.393077	0	1	1	no
ENSG00000070190.12	DAPP1	4.81727	5.74075	4.50515	3.18062	4.90936	2.52474	ENSG00000070190.12	DAPP1	chr4:99816832-99870154	MB468_CTRL	MB468_W2	OK	5.02106	3.53824	-0.504958	-1.04341	0.06275	0.173775	no
ENSG00000070193.4	FGF10	0	0	0	0	0	0	ENSG00000070193.4	FGF10	chr5:44303543-44413989	MB468_CTRL	MB468_W2	NOTEST	0	0	0	0	1	1	no
ENSG00000070214.15	SLC44A1	20.2034	21.3409	21.5715	18.7768	10.7151	20.2593	ENSG00000070214.15	SLC44A1	chr9:105244621-105439171	MB468_CTRL	MB468_W2	OK	21.0386	16.5837	-0.343272	-0.77255	0.14975	0.320261	no
ENSG00000070269.13	TMEM260	7.04931	7.19265	5.85864	8.51822	8.31929	6.23684	ENSG00000070269.13	TMEM260	chr14:56488353-56730535	MB468_CTRL	MB468_W2	OK	6.7002	7.69145	0.199051	0.280484	0.4728	0.669017	no
ENSG00000070366.13	SMG6	4.41548	8.52033	5.96803	3.90422	5.49149	7.20509	ENSG00000070366.13	SMG6	chr17:2054153-2381058	MB468_CTRL	MB468_W2	OK	6.30128	5.5336	-0.187427	-0.166313	0.5593	0.736728	no
ENSG00000070367.15	EXOC5	84.2892	93.9938	92.2664	37.1962	45.4613	58.6018	ENSG00000070367.15	EXOC5	chr14:57200506-57298742	MB468_CTRL	MB468_W2	OK	90.1831	47.0864	-0.937546	-2.88834	5e-05	0.000470501	yes
ENSG00000070371.15	CLTCL1	1.62382	4.75121	1.98886	4.27868	2.0502	2.18938	ENSG00000070371.15	CLTCL1	chr22:19179472-19291716	MB468_CTRL	MB468_W2	OK	2.78796	2.83942	0.0263843	0.0234838	0.94725	0.974585	no
ENSG00000070388.11	FGF22	0	0.146303	0	0	0	0	ENSG00000070388.11	FGF22	chr19:639878-644371	MB468_CTRL	MB468_W2	NOTEST	0.0487678	0	#NAME?	0	1	1	no
ENSG00000070404.9	FSTL3	1.05468	0.732715	3.13274	5.96122	3.35053	3.94513	ENSG00000070404.9	FSTL3	chr19:676364-683399	MB468_CTRL	MB468_W2	OK	1.64004	4.41896	1.42997	1.1326	0.0099	0.0417314	yes
ENSG00000070413.19	DGCR2	15.9558	20.2511	18.7841	18.3511	13.7878	17.7937	ENSG00000070413.19	DGCR2	chr22:19036281-19128449	MB468_CTRL	MB468_W2	OK	18.3303	16.6442	-0.139213	-0.367775	0.44765	0.648201	no
ENSG00000070423.17	RNF126	25.3005	32.9886	29.3019	24.3496	41.9857	31.6142	ENSG00000070423.17	RNF126	chr19:647525-663277	MB468_CTRL	MB468_W2	OK	29.197	32.6498	0.161257	0.596241	0.29055	0.496885	no
ENSG00000070444.14	MNT	9.18947	8.53752	11.431	14.6695	20.0779	19.1897	ENSG00000070444.14	MNT	chr17:2384059-2401118	MB468_CTRL	MB468_W2	OK	9.71933	17.979	0.887384	1.98184	0.0003	0.00233849	yes
ENSG00000070476.14	ZXDC	11.5018	14.7979	14.8312	18.8359	19.6073	17.3988	ENSG00000070476.14	ZXDC	chr3:126437600-126475919	MB468_CTRL	MB468_W2	OK	13.7103	18.614	0.44113	2.05079	0.0005	0.00361388	yes
ENSG00000070495.14	JMJD6	14.6318	16.3277	17.9805	15.804	23.9107	17.5651	ENSG00000070495.14	JMJD6	chr17:76712831-76726799	MB468_CTRL	MB468_W2	OK	16.3133	19.0933	0.227016	0.6717	0.22415	0.419246	no
ENSG00000070501.11	POLB	10.9181	15.3484	11.5237	16.1129	22.2356	32.5642	ENSG00000070501.11	POLB	chr8:42338453-42371808	MB468_CTRL	MB468_W2	OK	12.5967	23.6375	0.908031	1.92701	0.0004	0.00299751	yes
ENSG00000070526.14	ST6GALNAC1	0	0	0	0	0	0	ENSG00000070526.14	ST6GALNAC1	chr17:76624760-76643838	MB468_CTRL	MB468_W2	NOTEST	0	0	0	0	1	1	no
ENSG00000070540.12	WIPI1	14.1201	16.7685	16.478	15.8062	13.6635	16.7981	ENSG00000070540.12	WIPI1	chr17:68259181-68763882	MB468_CTRL	MB468_W2	OK	15.7889	15.4226	-0.0338609	-0.0556011	0.9161	0.958929	no
ENSG00000070601.9	FRMPD1	0.639534	0.460343	1.14902	0.284197	0.754279	0.543948	ENSG00000070601.9	FRMPD1	chr9:37510891-38069211	MB468_CTRL	MB468_W2	NOTEST	0.749633	0.527475	-0.507083	0	1	1	no
ENSG00000070610.14	GBA2	26.7484	30.2225	31.2435	82.0561	99.5805	96.2778	ENSG00000070610.14	GBA2	chr9:35696947-35749228	MB468_CTRL	MB468_W2	OK	29.4048	92.6381	1.65555	1.97712	0.0001	0.000882755	yes
ENSG00000070614.14	NDST1	23.5253	28.5476	27.6453	16.7752	23.922	20.944	ENSG00000070614.14	NDST1	chr5:150475530-150558211	MB468_CTRL	MB468_W2	OK	26.5727	20.5471	-0.371015	-0.99623	0.05915	0.166408	no
ENSG00000070669.16	ASNS	18.538	20.5165	19.9947	18.0438	29.9312	17.7538	ENSG00000070669.16	ASNS	chr7:97852117-97872542	MB468_CTRL	MB468_W2	OK	19.6831	21.9096	0.154608	0.33746	0.4572	0.656222	no
ENSG00000070718.11	AP3M2	10.5662	5.51602	5.34289	14.2049	21.1067	11.9648	ENSG00000070718.11	AP3M2	chr8:42152945-42171673	MB468_CTRL	MB468_W2	OK	7.14169	15.7588	1.14182	1.62062	0.0002	0.00163443	yes
ENSG00000070729.13	CNGB1	0.275496	0.846536	0.295524	2.86725	0.0587585	0.104459	ENSG00000070729.13	CNGB1	chr16:57882339-57971116	MB468_CTRL	MB468_W2	NOTEST	0.472518	1.01016	1.09614	0	1	1	no
ENSG00000070731.10	ST6GALNAC2	11.4817	13.0892	13.7355	8.83496	8.32181	11.2392	ENSG00000070731.10	ST6GALNAC2	chr17:76565378-76586956	MB468_CTRL	MB468_W2	OK	12.7688	9.46533	-0.431895	-0.694544	0.15495	0.327749	no
ENSG00000070748.17	CHAT	0	0	0	0	0	0	ENSG00000070748.17	CHAT	chr10:49609094-49665104	MB468_CTRL	MB468_W2	NOTEST	0	0	0	0	1	1	no
ENSG00000070756.14	PABPC1	1619.61	1575.23	1486.89	1156.73	1213.78	1196.56	ENSG00000070756.14	PABPC1	chr8:100685815-100722809	MB468_CTRL	MB468_W2	OK	1560.58	1189.02	-0.392305	-1.25051	0.029	0.0975413	no
ENSG00000070759.16	TESK2	0.909543	1.23844	1.07115	0.864427	0.988361	1.3173	ENSG00000070759.16	TESK2	chr1:45329162-45491166	MB468_CTRL	MB468_W2	NOTEST	1.07304	1.0567	-0.0221463	0	1	1	no
ENSG00000070761.7	CFAP20	49.4575	67.2194	46.5849	54.7911	48.5283	48.6443	ENSG00000070761.7	CFAP20	chr16:58113587-58129450	MB468_CTRL	MB468_W2	OK	54.4206	50.6546	-0.10346	-0.261328	0.58865	0.758062	no
ENSG00000070770.8	CSNK2A2	84.4385	92.4243	96.7311	85.3204	81.0881	80.3729	ENSG00000070770.8	CSNK2A2	chr16:58129528-58217805	MB468_CTRL	MB468_W2	OK	91.198	82.2605	-0.148803	-0.599841	0.2966	0.503449	no
ENSG00000070778.12	PTPN21	3.11627	2.68594	3.5022	2.1062	8.09571	2.68699	ENSG00000070778.12	PTPN21	chr14:88384923-88554733	MB468_CTRL	MB468_W2	OK	3.10147	4.2963	0.470144	0.478019	0.26805	0.470818	no
ENSG00000070785.16	EIF2B3	29.7044	38.1461	33.7689	28.9375	12.9234	20.202	ENSG00000070785.16	EIF2B3	chr1:44850521-44986722	MB468_CTRL	MB468_W2	OK	33.8731	20.6876	-0.711372	-1.60127	0.00825	0.0360104	yes
ENSG00000070808.15	CAMK2A	0	0	0	0.0896765	0	0	ENSG00000070808.15	CAMK2A	chr5:150189956-150290291	MB468_CTRL	MB468_W2	NOTEST	0	0.0298922	inf	0	1	1	no
ENSG00000070814.17	TCOF1	23.3184	25.8711	23.4044	22.6922	19.5619	31.7254	ENSG00000070814.17	TCOF1	chr5:150357638-150400308	MB468_CTRL	MB468_W2	OK	24.198	24.6598	0.0272747	0.0685153	0.89385	0.948502	no
ENSG00000070831.15	CDC42	49.6503	47.5404	55.902	38.1518	32.1308	30.439	ENSG00000070831.15	CDC42	chr1:22052626-22092946	MB468_CTRL	MB468_W2	OK	51.0309	33.5739	-0.604033	-3.17895	5e-05	0.000470501	yes
ENSG00000070882.12	OSBPL3	10.8763	13.3002	17.3403	28.6544	40.5534	24.1061	ENSG00000070882.12	OSBPL3	chr7:24796538-24981634	MB468_CTRL	MB468_W2	OK	13.8389	31.1046	1.1684	1.96248	5e-05	0.000470501	yes
ENSG00000070886.11	EPHA8	0	0	0	0	0.538766	0.42537	ENSG00000070886.11	EPHA8	chr1:22563563-22603594	MB468_CTRL	MB468_W2	NOTEST	0	0.321379	inf	0	1	1	no
ENSG00000070915.9	SLC12A3	0	0.0539448	0	0.0641747	0	0	ENSG00000070915.9	SLC12A3	chr16:56865206-56915850	MB468_CTRL	MB468_W2	NOTEST	0.0179816	0.0213916	0.25052	0	1	1	no
ENSG00000070950.9	RAD18	17.4021	15.9753	18.4121	6.50373	26.5548	11.0625	ENSG00000070950.9	RAD18	chr3:8619399-8963773	MB468_CTRL	MB468_W2	OK	17.2632	14.707	-0.231192	-0.27949	0.49765	0.689259	no
ENSG00000070961.15	ATP2B1	13.0055	17.5283	18.1161	9.49628	14.2626	19.0995	ENSG00000070961.15	ATP2B1	chr12:89561128-89712590	MB468_CTRL	MB468_W2	OK	16.2166	14.2861	-0.182856	-0.32926	0.553	0.731796	no
ENSG00000070985.13	TRPM5	0	0	0	0	0	0	ENSG00000070985.13	TRPM5	chr11:2404514-2423045	MB468_CTRL	MB468_W2	NOTEST	0	0	0	0	1	1	no
ENSG00000071051.13	NCK2	39.916	43.4433	42.0012	28.1241	37.0594	39.0302	ENSG00000071051.13	NCK2	chr2:105744896-105894274	MB468_CTRL	MB468_W2	OK	41.7868	34.7379	-0.266538	-1.53881	0.00785	0.0346148	yes
ENSG00000071054.16	MAP4K4	14.4693	16.825	13.8774	14.8099	13.8191	14.561	ENSG00000071054.16	MAP4K4	chr2:101696849-101894689	MB468_CTRL	MB468_W2	OK	15.0572	14.3967	-0.0647203	-0.149348	0.7651	0.877451	no
ENSG00000071073.12	MGAT4A	19.4854	18.3552	17.0452	18.2313	24.2032	19.2074	ENSG00000071073.12	MGAT4A	chr2:98619105-98731126	MB468_CTRL	MB468_W2	OK	18.2953	20.5473	0.16748	0.472374	0.36885	0.576114	no
ENSG00000071082.10	RPL31	427.087	439.801	424.741	232.11	495.408	224.903	ENSG00000071082.10	RPL31	chr2:100820151-101270316	MB468_CTRL	MB468_W2	OK	430.543	317.473	-0.439522	-0.799815	0.15845	0.332923	no
ENSG00000071127.16	WDR1	313.97	334.467	383.022	125.871	217.467	226.64	ENSG00000071127.16	WDR1	chr4:10074338-10116949	MB468_CTRL	MB468_W2	OK	343.82	189.992	-0.855711	-1.59779	0.0082	0.0358305	yes
ENSG00000071189.21	SNX13	12.9534	14.235	14.8916	14.2928	16.726	21.8806	ENSG00000071189.21	SNX13	chr7:17790760-17940501	MB468_CTRL	MB468_W2	OK	14.0266	17.6331	0.330118	0.926376	0.0762	0.200078	no
ENSG00000071205.11	ARHGAP10	1.99416	3.05298	3.05288	3.85396	5.61966	7.05331	ENSG00000071205.11	ARHGAP10	chr4:147732062-148072780	MB468_CTRL	MB468_W2	OK	2.7	5.50898	1.02882	1.36578	0.00935	0.0397606	yes
ENSG00000071242.11	RPS6KA2	10.8002	10.6684	9.38372	8.01696	11.292	13.2983	ENSG00000071242.11	RPS6KA2	chr6:166409363-166957191	MB468_CTRL	MB468_W2	OK	10.2841	10.8691	0.0798125	0.175213	0.72775	0.853688	no
ENSG00000071243.15	ING3	8.52894	6.92261	11.1757	10.1884	11.4284	8.44117	ENSG00000071243.15	ING3	chr7:120950748-120977216	MB468_CTRL	MB468_W2	OK	8.87574	10.0193	0.174845	0.374122	0.48875	0.681569	no
ENSG00000071246.10	VASH1	0.0497692	0.098496	0	0.0586107	0	0.152424	ENSG00000071246.10	VASH1	chr14:76762188-76826246	MB468_CTRL	MB468_W2	NOTEST	0.0494217	0.070345	0.509302	0	1	1	no
ENSG00000071282.11	LMCD1	1.41601	0.850159	0.4505	1.0415	0.74251	0.517205	ENSG00000071282.11	LMCD1	chr3:7952804-8611924	MB468_CTRL	MB468_W2	NOTEST	0.905555	0.767073	-0.239439	0	1	1	no
ENSG00000071462.11	WBSCR22	38.2658	30.3733	41.5099	34.0916	32.6283	41.0155	ENSG00000071462.11	WBSCR22	chr7:73680968-73719672	MB468_CTRL	MB468_W2	OK	36.7163	35.9118	-0.0319643	-0.115605	0.82475	0.91174	no
ENSG00000071537.13	SEL1L	9.94106	16.2037	14.4419	7.38708	10.5139	10.1611	ENSG00000071537.13	SEL1L	chr14:81471548-81533861	MB468_CTRL	MB468_W2	OK	13.5289	9.35402	-0.532383	-1.11198	0.0485	0.143426	no
ENSG00000071539.13	TRIP13	32.4034	37.3189	37.2076	24.1047	22.1227	35.2084	ENSG00000071539.13	TRIP13	chr5:795605-919357	MB468_CTRL	MB468_W2	OK	35.6433	27.1453	-0.392932	-0.747881	0.11435	0.266376	no
ENSG00000071553.16	ATP6AP1	61.1221	63.9561	60.8582	42.5216	40.9112	34.3386	ENSG00000071553.16	ATP6AP1	chrX:154428631-154436516	MB468_CTRL	MB468_W2	OK	61.9788	39.2571	-0.65882	-3.20588	5e-05	0.000470501	yes
ENSG00000071564.14	TCF3	71.6974	73.8764	80.9611	49.6911	69.2088	81.8928	ENSG00000071564.14	TCF3	chr19:1609289-1652605	MB468_CTRL	MB468_W2	OK	75.5116	66.9309	-0.174025	-0.755482	0.19275	0.380005	no
ENSG00000071575.11	TRIB2	53.9579	51.788	58.3575	51.597	54.4653	58.5572	ENSG00000071575.11	TRIB2	chr2:12716888-12742734	MB468_CTRL	MB468_W2	OK	54.7011	54.8732	0.00453124	0.0159566	0.9775	0.989104	no
ENSG00000071626.16	DAZAP1	52.893	56.6592	54.7567	45.7291	55.1214	62.9697	ENSG00000071626.16	DAZAP1	chr19:1407568-1435687	MB468_CTRL	MB468_W2	OK	54.7696	54.6067	-0.00429746	-0.026676	0.9629	0.981812	no
ENSG00000071655.17	MBD3	23.8685	23.4509	25.8679	25.5002	35.9145	34.129	ENSG00000071655.17	MBD3	chr19:1573595-1605490	MB468_CTRL	MB468_W2	OK	24.3958	31.8479	0.384568	1.1885	0.03445	0.110945	no
ENSG00000071794.15	HLTF	30.4967	28.1763	29.511	15.613	16.8232	22.6657	ENSG00000071794.15	HLTF	chr3:149030126-149102823	MB468_CTRL	MB468_W2	OK	29.3947	18.3673	-0.678415	-1.53448	0.0043	0.0213237	yes
ENSG00000071859.14	FAM50A	22.4126	22.2819	27.9776	34.693	29.0025	50.051	ENSG00000071859.14	FAM50A	chrX:154444125-154450654	MB468_CTRL	MB468_W2	OK	24.224	37.9155	0.646347	1.42023	0.0367	0.116522	no
ENSG00000071889.16	FAM3A	41.0956	53.438	43.8936	42.4493	73.7659	61.6132	ENSG00000071889.16	FAM3A	chrX:154506158-154516242	MB468_CTRL	MB468_W2	OK	46.1424	59.2762	0.361359	1.36399	0.01355	0.0536612	no
ENSG00000071894.15	CPSF1	24.9226	29.6403	26.3325	38.7152	56.6301	67.3318	ENSG00000071894.15	CPSF1	chr8:144373100-144409349	MB468_CTRL	MB468_W2	OK	26.9651	54.2257	1.00788	1.88407	0.0001	0.000882755	yes
ENSG00000071909.18	MYO3B	0	0	0	0.238749	0	0.146143	ENSG00000071909.18	MYO3B	chr2:170178144-170695374	MB468_CTRL	MB468_W2	NOTEST	0	0.128297	inf	0	1	1	no
ENSG00000071967.11	CYBRD1	4.07898	5.57123	6.83763	1.70135	3.90665	4.42316	ENSG00000071967.11	CYBRD1	chr2:171522246-171558133	MB468_CTRL	MB468_W2	OK	5.49594	3.34372	-0.716914	-0.718557	0.11505	0.267412	no
ENSG00000071991.8	CDH19	0	0	0	0	0	0	ENSG00000071991.8	CDH19	chr18:66501082-66604138	MB468_CTRL	MB468_W2	NOTEST	0	0	0	0	1	1	no
ENSG00000071994.10	PDCD2	38.2294	40.7564	37.1659	47.6301	59.5439	56.1825	ENSG00000071994.10	PDCD2	chr6:170575294-170584692	MB468_CTRL	MB468_W2	OK	38.7172	54.4522	0.492014	2.35692	5e-05	0.000470501	yes
ENSG00000072041.16	SLC6A15	0	0	0	0	0	0	ENSG00000072041.16	SLC6A15	chr12:84859487-84913615	MB468_CTRL	MB468_W2	NOTEST	0	0	0	0	1	1	no
ENSG00000072042.12	RDH11	26.1436	25.0926	30.0856	21.4894	22.8925	17.4926	ENSG00000072042.12	RDH11	chr14:67619797-67695814	MB468_CTRL	MB468_W2	OK	27.1073	20.6248	-0.394296	-1.1753	0.034	0.109795	no
ENSG00000072062.13	PRKACA	97.1557	107.511	110.611	76.1043	85.6817	75.0108	ENSG00000072062.13	PRKACA	chr19:14091687-14118084	MB468_CTRL	MB468_W2	OK	105.093	78.9323	-0.412974	-1.69753	0.00485	0.0234949	yes
ENSG00000072071.16	ADGRL1	42.25	42.0607	37.7676	38.5867	58.8706	79.0479	ENSG00000072071.16	ADGRL1	chr19:14137178-14206187	MB468_CTRL	MB468_W2	OK	40.6928	58.8351	0.531904	1.18309	0.043	0.13138	no
ENSG00000072110.13	ACTN1	92.7698	106.627	94.6187	65.605	64.4791	72.6102	ENSG00000072110.13	ACTN1	chr14:68874142-68979440	MB468_CTRL	MB468_W2	OK	98.005	67.5648	-0.536585	-2.32126	5e-05	0.000470501	yes
ENSG00000072121.15	ZFYVE26	2.38442	3.50915	3.80547	4.39077	10.4625	13.8652	ENSG00000072121.15	ZFYVE26	chr14:67701885-67816590	MB468_CTRL	MB468_W2	OK	3.23301	9.57284	1.56607	1.57231	0.00255	0.0139705	yes
ENSG00000072133.10	RPS6KA6	0	0	0	0	0	0	ENSG00000072133.10	RPS6KA6	chrX:84058345-84187907	MB468_CTRL	MB468_W2	NOTEST	0	0	0	0	1	1	no
ENSG00000072134.15	EPN2	6.01137	7.55311	10.2438	5.00485	29.1445	5.01998	ENSG00000072134.15	EPN2	chr17:19215614-19336715	MB468_CTRL	MB468_W2	OK	7.9361	13.0564	0.718258	0.729866	0.072	0.192259	no
ENSG00000072135.12	PTPN18	13.6371	17.6653	15.5692	17.1403	24.1724	20.0824	ENSG00000072135.12	PTPN18	chr2:130356006-130375409	MB468_CTRL	MB468_W2	OK	15.6239	20.465	0.38941	1.16096	0.02035	0.073841	no
ENSG00000072163.19	LIMS2	0.989802	1.94365	1.73283	1.40079	0.97181	1.69785	ENSG00000072163.19	LIMS2	chr2:127638380-127681786	MB468_CTRL	MB468_W2	NOTEST	1.55543	1.35682	-0.197084	0	1	1	no
ENSG00000072182.12	ASIC4	0	0.0626187	0	0	0.243813	0.218745	ENSG00000072182.12	ASIC4	chr2:219434845-219538772	MB468_CTRL	MB468_W2	NOTEST	0.0208729	0.154186	2.88497	0	1	1	no
ENSG00000072195.14	SPEG	4.55903	6.16003	3.07584	4.67605	15.3464	9.23156	ENSG00000072195.14	SPEG	chr2:219434845-219538772	MB468_CTRL	MB468_W2	OK	4.5983	9.75135	1.0845	1.23141	0.0014	0.00852655	yes
ENSG00000072201.13	LNX1	1.81195	2.97606	4.84203	5.9362	0.533623	0.508414	ENSG00000072201.13	LNX1	chr4:53377642-54298247	MB468_CTRL	MB468_W2	OK	3.21002	2.32608	-0.46468	-0.30431	0.4527	0.652395	no
ENSG00000072210.18	ALDH3A2	35.8924	25.0321	39.4405	18.3048	40.0148	39.3951	ENSG00000072210.18	ALDH3A2	chr17:19648135-19677598	MB468_CTRL	MB468_W2	OK	33.455	32.5716	-0.0386075	-0.0710147	0.89025	0.946819	no
ENSG00000072274.12	TFRC	196.604	215.361	200.298	110.378	95.6913	102.795	ENSG00000072274.12	TFRC	chr3:196027182-196082189	MB468_CTRL	MB468_W2	OK	204.088	102.955	-0.987176	-3.62371	5e-05	0.000470501	yes
ENSG00000072310.16	SREBF1	45.3837	39.7948	45.2425	88.8976	65.1703	68.997	ENSG00000072310.16	SREBF1	chr17:17681472-17837002	MB468_CTRL	MB468_W2	OK	43.4736	74.3549	0.774288	1.7623	0.0008	0.00535066	yes
ENSG00000072315.3	TRPC5	0	0	0	0	0	0	ENSG00000072315.3	TRPC5	chrX:111774314-112082776	MB468_CTRL	MB468_W2	NOTEST	0	0	0	0	1	1	no
ENSG00000072364.12	AFF4	34.8882	34.0175	39.97	28.0469	28.7958	28.7578	ENSG00000072364.12	AFF4	chr5:132875378-132963634	MB468_CTRL	MB468_W2	OK	36.2919	28.5335	-0.346991	-0.988537	0.0711	0.19041	no
ENSG00000072401.14	UBE2D1	17.588	12.5532	11.911	12.5744	22.4496	11.9056	ENSG00000072401.14	UBE2D1	chr10:58334974-58370753	MB468_CTRL	MB468_W2	OK	14.0174	15.6432	0.158318	0.524607	0.35035	0.558427	no
ENSG00000072415.8	MPP5	14.4599	13.9474	14.2907	15.5313	16.8228	13.8214	ENSG00000072415.8	MPP5	chr14:67241108-67386516	MB468_CTRL	MB468_W2	OK	14.2326	15.3918	0.112962	0.181832	0.72185	0.850469	no
ENSG00000072422.16	RHOBTB1	1.4433	2.22053	2.87753	1.31258	3.76394	1.38877	ENSG00000072422.16	RHOBTB1	chr10:60869437-61001440	MB468_CTRL	MB468_W2	NOTEST	2.18046	2.1551	-0.0168754	0	1	1	no
ENSG00000072501.17	SMC1A	85.5987	90.1009	98.662	52.331	53.7546	59.0951	ENSG00000072501.17	SMC1A	chrX:53374148-53431120	MB468_CTRL	MB468_W2	OK	91.4539	55.0602	-0.732033	-2.05254	0.0005	0.00361388	yes
ENSG00000072506.12	HSD17B10	56.0744	60.6924	57.0873	31.4287	43.8183	35.9233	ENSG00000072506.12	HSD17B10	chrX:53431257-53434373	MB468_CTRL	MB468_W2	OK	57.9514	37.0568	-0.645104	-2.85178	5e-05	0.000470501	yes
ENSG00000072518.20	MARK2	36.865	36.6604	38.8243	27.9038	34.5549	31.0339	ENSG00000072518.20	MARK2	chr11:63838927-63911019	MB468_CTRL	MB468_W2	OK	37.4499	31.1642	-0.265072	-0.818319	0.1327	0.294789	no
ENSG00000072571.19	HMMR	13.1874	14.6906	15.9909	15.5278	13.1258	17.379	ENSG00000072571.19	HMMR	chr5:163460202-163494058	MB468_CTRL	MB468_W2	OK	14.623	15.3442	0.069452	0.204636	0.64965	0.802473	no
ENSG00000072609.17	CHFR	14.1842	18.0538	23.9171	27.7076	34.0864	29.1336	ENSG00000072609.17	CHFR	chr12:132768908-132956306	MB468_CTRL	MB468_W2	OK	18.7184	30.3092	0.6953	1.07954	0.05255	0.15233	no
ENSG00000072657.8	TRHDE	0	0	0	0.0758048	0	0	ENSG00000072657.8	TRHDE	chr12:71938845-72670757	MB468_CTRL	MB468_W2	NOTEST	0	0.0252683	inf	0	1	1	no
ENSG00000072682.18	P4HA2	9.09209	9.52825	10.762	6.83018	4.88156	7.69523	ENSG00000072682.18	P4HA2	chr5:132184875-132395614	MB468_CTRL	MB468_W2	OK	9.79412	6.46899	-0.598375	-0.837422	0.02595	0.0893573	no
ENSG00000072736.18	NFATC3	10.2397	10.0721	9.09639	8.82004	8.52932	6.462	ENSG00000072736.18	NFATC3	chr16:67987393-68238102	MB468_CTRL	MB468_W2	OK	9.80273	7.93712	-0.304569	-0.711029	0.127	0.286309	no
ENSG00000072756.16	TRNT1	15.3575	7.57284	10.5641	9.8834	18.4408	16.9456	ENSG00000072756.16	TRNT1	chr3:3126915-3179710	MB468_CTRL	MB468_W2	OK	11.1648	15.0899	0.434627	0.539225	0.25775	0.45904	no
ENSG00000072778.19	ACADVL	109.396	123.01	105.004	165.887	206.105	201.377	ENSG00000072778.19	ACADVL	chr17:7189889-7225273	MB468_CTRL	MB468_W2	OK	112.47	191.123	0.764962	3.166	5e-05	0.000470501	yes
ENSG00000072786.12	STK10	16.8662	15.0962	16.8662	9.13731	12.4478	15.9325	ENSG00000072786.12	STK10	chr5:172042072-172188386	MB468_CTRL	MB468_W2	OK	16.2762	12.5059	-0.38016	-0.712949	0.12885	0.289145	no
ENSG00000072803.17	FBXW11	39.4578	39.3531	44.1466	36.3304	35.0253	31.5901	ENSG00000072803.17	FBXW11	chr5:171861548-172006873	MB468_CTRL	MB468_W2	OK	40.9858	34.3153	-0.256274	-0.807445	0.10915	0.258034	no
ENSG00000072818.11	ACAP1	0	0	0	0	0	0	ENSG00000072818.11	ACAP1	chr17:7336528-7351478	MB468_CTRL	MB468_W2	NOTEST	0	0	0	0	1	1	no
ENSG00000072832.14	CRMP1	0	0	0	0	0	0	ENSG00000072832.14	CRMP1	chr4:5711196-5893058	MB468_CTRL	MB468_W2	NOTEST	0	0	0	0	1	1	no
ENSG00000072840.12	EVC	0	0	0	0	0	0	ENSG00000072840.12	EVC	chr4:5711196-5893058	MB468_CTRL	MB468_W2	NOTEST	0	0	0	0	1	1	no
ENSG00000072849.10	DERL2	19.3065	21.9375	24.6289	14.5014	36.9418	38.9773	ENSG00000072849.10	DERL2	chr17:5471250-5490814	MB468_CTRL	MB468_W2	OK	21.9576	30.1402	0.456965	0.664543	0.1949	0.382597	no
ENSG00000072858.10	SIDT1	0.437698	0.378539	0.724393	0.114042	1.94116	1.59171	ENSG00000072858.10	SIDT1	chr3:113532295-113629578	MB468_CTRL	MB468_W2	NOTEST	0.513543	1.21564	1.24315	0	1	1	no
ENSG00000072864.13	NDE1	20.0269	17.8181	24.2366	10.9346	20.8418	26.6449	ENSG00000072864.13	NDE1	chr16:15643266-15857033	MB468_CTRL	MB468_W2	OK	20.6939	19.4738	-0.0876685	-0.16934	0.71	0.842357	no
ENSG00000072952.18	MRVI1	0.0676115	0.15665	0.0934052	0	0	0.0645369	ENSG00000072952.18	MRVI1	chr11:10541271-10693988	MB468_CTRL	MB468_W2	NOTEST	0.105889	0.0215123	-2.29932	0	1	1	no
ENSG00000072954.6	TMEM38A	20.9341	23.3022	22.2675	20.5018	18.2038	25.2047	ENSG00000072954.6	TMEM38A	chr19:16661126-16690029	MB468_CTRL	MB468_W2	OK	22.1679	21.3034	-0.057387	-0.21246	0.70095	0.836657	no
ENSG00000072958.8	AP1M1	21.9598	19.2064	30.5284	23.2798	21.6896	23.9344	ENSG00000072958.8	AP1M1	chr19:16197577-16245907	MB468_CTRL	MB468_W2	OK	23.8982	22.9679	-0.0572799	-0.115378	0.81105	0.903791	no
ENSG00000073008.14	PVR	30.6197	32.7309	31.8623	45.9674	60.2428	51.4436	ENSG00000073008.14	PVR	chr19:44537057-44718759	MB468_CTRL	MB468_W2	OK	31.7377	52.5512	0.727529	3.1376	5e-05	0.000470501	yes
ENSG00000073050.11	XRCC1	15.9448	21.5009	22.6457	20.6432	21.3316	14.2579	ENSG00000073050.11	XRCC1	chr19:43543039-43596135	MB468_CTRL	MB468_W2	OK	20.0305	18.7442	-0.0957508	-0.164222	0.76365	0.876556	no
ENSG00000073060.15	SCARB1	4.84392	11.3629	7.06378	11.8853	10.8189	7.07108	ENSG00000073060.15	SCARB1	chr12:124776855-124882668	MB468_CTRL	MB468_W2	OK	7.75687	9.92512	0.355611	0.505271	0.3396	0.548303	no
ENSG00000073067.13	CYP2W1	0	0	0	0	0	0	ENSG00000073067.13	CYP2W1	chr7:983198-989640	MB468_CTRL	MB468_W2	NOTEST	0	0	0	0	1	1	no
ENSG00000073111.13	MCM2	32.9192	34.6016	43.232	23.4821	18.4045	24.7509	ENSG00000073111.13	MCM2	chr3:127573068-127622436	MB468_CTRL	MB468_W2	OK	36.9176	22.2125	-0.732937	-1.72967	0.00315	0.016581	yes
ENSG00000073146.15	MOV10L1	0.0344434	0.220333	0	0	0	0	ENSG00000073146.15	MOV10L1	chr22:50089878-50161690	MB468_CTRL	MB468_W2	NOTEST	0.0849254	0	#NAME?	0	1	1	no
ENSG00000073150.13	PANX2	1.18493	1.51474	2.39226	3.35616	2.87111	2.81198	ENSG00000073150.13	PANX2	chr22:50170730-50180294	MB468_CTRL	MB468_W2	OK	1.69731	3.01308	0.827992	1.5634	0.0079	0.0347934	yes
ENSG00000073169.13	SELO	7.27124	7.81046	7.92238	10.4119	14.7419	8.08396	ENSG00000073169.13	SELO	chr22:50200978-50217616	MB468_CTRL	MB468_W2	OK	7.66803	11.0793	0.530937	1.65729	0.00485	0.0234949	yes
ENSG00000073282.12	TP63	0.526381	0.342719	0.649644	0.367306	0.756073	0.120626	ENSG00000073282.12	TP63	chr3:189631415-189897279	MB468_CTRL	MB468_W2	NOTEST	0.506248	0.414668	-0.287888	0	1	1	no
ENSG00000073331.17	ALPK1	2.45612	2.77726	2.58097	3.85649	2.82181	3.78814	ENSG00000073331.17	ALPK1	chr4:112274541-112442620	MB468_CTRL	MB468_W2	OK	2.60478	3.48882	0.421573	0.307893	0.2871	0.493102	no
ENSG00000073350.13	LLGL2	44.996	53.7306	53.5084	41.6091	66.4466	59.5439	ENSG00000073350.13	LLGL2	chr17:75525079-75575208	MB468_CTRL	MB468_W2	OK	50.745	55.8666	0.138719	0.523608	0.32395	0.53182	no
ENSG00000073417.14	PDE8A	9.999	8.27863	7.67362	9.52188	11.251	12.6859	ENSG00000073417.14	PDE8A	chr15:84980439-85139145	MB468_CTRL	MB468_W2	OK	8.65042	11.153	0.366584	0.665214	0.1253	0.283575	no
ENSG00000073464.11	CLCN4	1.1389	0.508161	0.6655	0.921894	0.752045	0.716869	ENSG00000073464.11	CLCN4	chrX:10156944-10237660	MB468_CTRL	MB468_W2	NOTEST	0.770854	0.796936	0.0480061	0	1	1	no
ENSG00000073536.17	NLE1	4.0174	4.99165	4.69771	5.06114	12.1616	4.49649	ENSG00000073536.17	NLE1	chr17:35121578-35142315	MB468_CTRL	MB468_W2	OK	4.56892	7.23974	0.664084	1.21688	0.02485	0.0863401	no
ENSG00000073578.16	SDHA	94.0574	104.521	99.8621	102.016	110.971	100.308	ENSG00000073578.16	SDHA	chr5:218240-256700	MB468_CTRL	MB468_W2	OK	99.4803	104.432	0.0700746	0.250179	0.61605	0.779526	no
ENSG00000073584.18	SMARCE1	44.3985	46.0162	53.9242	32.8018	32.6244	53.3703	ENSG00000073584.18	SMARCE1	chr17:40624961-40665181	MB468_CTRL	MB468_W2	OK	48.113	39.5988	-0.280967	-0.86585	0.1198	0.275016	no
ENSG00000073598.5	FNDC8	0	0.128747	0	0	0	0	ENSG00000073598.5	FNDC8	chr17:35121578-35142315	MB468_CTRL	MB468_W2	NOTEST	0.0429157	0	#NAME?	0	1	1	no
ENSG00000073605.18	GSDMB	0.343323	0.600594	0.565631	5.14391	6.05455	2.91928	ENSG00000073605.18	GSDMB	chr17:39904594-39919854	MB468_CTRL	MB468_W2	OK	0.503183	4.70592	3.22532	0.867184	5e-05	0.000470501	yes
ENSG00000073614.12	KDM5A	15.4324	9.44335	10.1185	15.6109	9.30197	15.0572	ENSG00000073614.12	KDM5A	chr12:280128-442645	MB468_CTRL	MB468_W2	OK	11.6647	13.3233	0.1918	0.206882	0.6649	0.812845	no
ENSG00000073670.13	ADAM11	0.159657	0	0	0.16772	0	0.287018	ENSG00000073670.13	ADAM11	chr17:44759030-44781846	MB468_CTRL	MB468_W2	NOTEST	0.0532191	0.151579	1.51006	0	1	1	no
ENSG00000073711.10	PPP2R3A	11.3826	11.8941	11.1514	8.88172	8.99397	12.8422	ENSG00000073711.10	PPP2R3A	chr3:135965672-136147891	MB468_CTRL	MB468_W2	OK	11.476	10.2393	-0.164508	-0.675837	0.1979	0.386211	no
ENSG00000073712.14	FERMT2	19.4573	19.5659	22.846	18.3984	13.1172	20.3469	ENSG00000073712.14	FERMT2	chr14:52857267-52952435	MB468_CTRL	MB468_W2	OK	20.6231	17.2875	-0.254528	-0.908904	0.08445	0.215008	no
ENSG00000073734.8	ABCB11	0	0.0279393	0	0	0	0	ENSG00000073734.8	ABCB11	chr2:168922937-169031322	MB468_CTRL	MB468_W2	NOTEST	0.00931309	0	#NAME?	0	1	1	no
ENSG00000073737.16	DHRS9	0	0.330604	0	0	0	0	ENSG00000073737.16	DHRS9	chr2:169064788-169096167	MB468_CTRL	MB468_W2	NOTEST	0.110201	0	#NAME?	0	1	1	no
ENSG00000073754.5	CD5L	0	0	0	0	0	0	ENSG00000073754.5	CD5L	chr1:157830913-157898256	MB468_CTRL	MB468_W2	NOTEST	0	0	0	0	1	1	no
ENSG00000073756.11	PTGS2	0	0	0	0	0	0	ENSG00000073756.11	PTGS2	chr1:186671790-186680427	MB468_CTRL	MB468_W2	NOTEST	0	0	0	0	1	1	no
ENSG00000073792.15	IGF2BP2	25.0474	9.66017	17.4161	11.6563	9.18537	72.6655	ENSG00000073792.15	IGF2BP2	chr3:185643738-185825056	MB468_CTRL	MB468_W2	OK	17.3746	31.169	0.843137	1.75557	0.0205	0.0742677	no
ENSG00000073803.13	MAP3K13	10.2691	13.388	9.94694	11.2257	18.8191	10.8191	ENSG00000073803.13	MAP3K13	chr3:185282940-185499057	MB468_CTRL	MB468_W2	OK	11.2013	13.6213	0.282195	0.395891	0.3681	0.575507	no
ENSG00000073849.14	ST6GAL1	8.15874	9.46226	8.56107	9.10249	10.1973	6.02107	ENSG00000073849.14	ST6GAL1	chr3:186930484-187078553	MB468_CTRL	MB468_W2	OK	8.72735	8.44027	-0.0482548	-0.0633746	0.8496	0.925808	no
ENSG00000073861.2	TBX21	0.0724204	0	0	0	0.251864	0	ENSG00000073861.2	TBX21	chr17:47733243-47746119	MB468_CTRL	MB468_W2	NOTEST	0.0241401	0.0839547	1.79818	0	1	1	no
ENSG00000073905.8	VDAC1P1	0.964934	0.903008	1.09756	0.536751	0.641212	0.547356	ENSG00000073905.8	VDAC1P1	chrX:80929499-80930347	MB468_CTRL	MB468_W2	NOTEST	0.988501	0.575106	-0.781414	0	1	1	no
ENSG00000073910.19	FRY	1.34547	1.89355	2.21286	0.898281	2.18685	1.64961	ENSG00000073910.19	FRY	chr13:32025313-32299122	MB468_CTRL	MB468_W2	NOTEST	1.81729	1.57825	-0.203466	0	1	1	no
ENSG00000073921.17	PICALM	101.13	111.364	94.2912	85.6643	83.7542	63.1369	ENSG00000073921.17	PICALM	chr11:85957683-86069882	MB468_CTRL	MB468_W2	OK	102.262	77.5185	-0.399654	-1.20353	0.03575	0.114138	no
ENSG00000073969.18	NSF	4.80395	5.07503	9.52301	3.73356	3.96944	3.44255	ENSG00000073969.18	NSF	chr17:46590668-46757464	MB468_CTRL	MB468_W2	OK	6.46733	3.71518	-0.799737	-0.927954	0.03185	0.104631	no
ENSG00000074047.21	GLI2	0	0	0	0	0	0	ENSG00000074047.21	GLI2	chr2:120735622-120992653	MB468_CTRL	MB468_W2	NOTEST	0	0	0	0	1	1	no
ENSG00000074054.17	CLASP1	24.9383	16.4262	23.5828	21.3219	16.6909	24.1492	ENSG00000074054.17	CLASP1	chr2:121337775-121649587	MB468_CTRL	MB468_W2	OK	21.6491	20.7207	-0.0632371	-0.103305	0.84645	0.923858	no
ENSG00000074071.14	MRPS34	83.3678	92.4009	99.7201	49.2628	51.3458	66.507	ENSG00000074071.14	MRPS34	chr16:1771889-1773155	MB468_CTRL	MB468_W2	OK	91.8296	55.7052	-0.721147	-4.46216	5e-05	0.000470501	yes
ENSG00000074181.8	NOTCH3	122.224	136.939	125.883	102.742	139.94	141.443	ENSG00000074181.8	NOTCH3	chr19:15159037-15200981	MB468_CTRL	MB468_W2	OK	128.349	128.042	-0.00345093	-0.0165381	0.9756	0.988328	no
ENSG00000074201.8	CLNS1A	75.2061	68.3537	93.2126	46.5553	72.59	67.7647	ENSG00000074201.8	CLNS1A	chr11:77514935-77637805	MB468_CTRL	MB468_W2	OK	78.9241	62.3034	-0.341156	-1.12055	0.0565	0.160904	no
ENSG00000074211.13	PPP2R2C	2.24642	1.39155	2.52913	0.201937	0.982074	2.10258	ENSG00000074211.13	PPP2R2C	chr4:6320577-6563600	MB468_CTRL	MB468_W2	NOTEST	2.0557	1.09553	-0.907998	0	1	1	no
ENSG00000074219.13	TEAD2	18.5118	22.1605	25.9151	20.4791	33.248	24.9416	ENSG00000074219.13	TEAD2	chr19:49331616-49388081	MB468_CTRL	MB468_W2	OK	22.1958	26.2229	0.240541	0.729477	0.1824	0.366761	no
ENSG00000074266.18	EED	17.9176	19.0078	20.0362	25.6344	45.0803	35.4808	ENSG00000074266.18	EED	chr11:86244543-86278813	MB468_CTRL	MB468_W2	OK	18.9872	35.3985	0.898658	2.13463	5e-05	0.000470501	yes
ENSG00000074276.10	CDHR2	0	0	0.0457483	0	0	0	ENSG00000074276.10	CDHR2	chr5:176542510-176610133	MB468_CTRL	MB468_W2	NOTEST	0.0152494	0	#NAME?	0	1	1	no
ENSG00000074317.10	SNCB	0	0	0.131334	0	0	0	ENSG00000074317.10	SNCB	chr5:176620083-176630556	MB468_CTRL	MB468_W2	NOTEST	0.043778	0	#NAME?	0	1	1	no
ENSG00000074319.12	TSG101	22.4414	25.0032	27.6492	24.2636	14.9817	14.8609	ENSG00000074319.12	TSG101	chr11:18455823-18527232	MB468_CTRL	MB468_W2	OK	25.0312	18.0354	-0.472899	-0.91705	0.06395	0.176326	no
ENSG00000074356.16	NCBP3	5.74918	4.31874	6.36586	4.94444	4.59525	4.49849	ENSG00000074356.16	NCBP3	chr17:3802164-3846251	MB468_CTRL	MB468_W2	OK	5.47793	4.67939	-0.227308	-0.331345	0.42725	0.629834	no
ENSG00000074370.17	ATP2A3	0.819747	1.38881	1.69137	1.14579	0.460074	3.35686	ENSG00000074370.17	ATP2A3	chr17:3923869-3964464	MB468_CTRL	MB468_W2	NOTEST	1.29998	1.65424	0.347685	0	1	1	no
ENSG00000074410.13	CA12	0.0966654	0	0.0623592	0	0	0	ENSG00000074410.13	CA12	chr15:63321377-63382161	MB468_CTRL	MB468_W2	NOTEST	0.0530082	0	#NAME?	0	1	1	no
ENSG00000074416.13	MGLL	36.0277	47.2342	20.9286	12.5607	12.9108	37.375	ENSG00000074416.13	MGLL	chr3:127689061-127823250	MB468_CTRL	MB468_W2	OK	34.7302	20.9488	-0.729321	-0.45547	0.27905	0.483764	no
ENSG00000074527.11	NTN4	38.8751	44.9539	44.4188	26.5686	33.7411	24.4141	ENSG00000074527.11	NTN4	chr12:95551581-95791152	MB468_CTRL	MB468_W2	OK	42.7493	28.2412	-0.598096	-2.8537	5e-05	0.000470501	yes
ENSG00000074582.12	BCS1L	26.529	30.2299	20.347	30.2016	30.5693	28.1111	ENSG00000074582.12	BCS1L	chr2:218637915-218663443	MB468_CTRL	MB468_W2	OK	25.702	29.6273	0.20505	0.44448	0.399	0.603954	no
ENSG00000074590.13	NUAK1	3.31985	2.07314	1.22943	0.997541	0.891576	3.57257	ENSG00000074590.13	NUAK1	chr12:106063339-106140033	MB468_CTRL	MB468_W2	NOTEST	2.20748	1.82056	-0.278015	0	1	1	no
ENSG00000074603.18	DPP8	12.1377	12.1032	13.1769	10.006	24.0029	13.6581	ENSG00000074603.18	DPP8	chr15:65442462-65517704	MB468_CTRL	MB468_W2	OK	12.4726	15.889	0.349268	0.662201	0.17875	0.361764	no
ENSG00000074621.13	SLC24A1	1.27698	0.837387	1.22659	0.561658	0.265136	2.67941	ENSG00000074621.13	SLC24A1	chr15:65611365-65891991	MB468_CTRL	MB468_W2	NOTEST	1.11365	1.16874	0.0696495	0	1	1	no
ENSG00000074657.13	ZNF532	11.8832	20.1241	13.5304	20.2637	23.1316	13.6712	ENSG00000074657.13	ZNF532	chr18:58862599-58986480	MB468_CTRL	MB468_W2	OK	15.1792	19.0221	0.32558	0.593459	0.18795	0.373759	no
ENSG00000074660.15	SCARF1	0.0714665	0	0	0	0.316565	0	ENSG00000074660.15	SCARF1	chr17:1633857-1645747	MB468_CTRL	MB468_W2	NOTEST	0.0238222	0.105522	2.14717	0	1	1	no
ENSG00000074695.5	LMAN1	32.6473	33.8814	32.1234	21.8009	21.6938	30.0369	ENSG00000074695.5	LMAN1	chr18:59327822-59359962	MB468_CTRL	MB468_W2	OK	32.884	24.5105	-0.423987	-1.44116	0.0063	0.0290559	yes
ENSG00000074696.12	HACD3	26.5077	30.4954	28.2976	24.6689	25.7415	25.5507	ENSG00000074696.12	HACD3	chr15:65530417-65578352	MB468_CTRL	MB468_W2	OK	28.4336	25.3203	-0.167298	-0.790082	0.14115	0.30754	no
ENSG00000074706.13	IPCEF1	0	0.0255593	0.151786	0	0	0	ENSG00000074706.13	IPCEF1	chr6:154010495-154356792	MB468_CTRL	MB468_W2	NOTEST	0.059115	0	#NAME?	0	1	1	no
ENSG00000074755.14	ZZEF1	7.92175	17.9671	12.5705	14.1768	15.5	15.5593	ENSG00000074755.14	ZZEF1	chr17:4004444-4143020	MB468_CTRL	MB468_W2	OK	12.8198	15.0787	0.234139	0.41713	0.43845	0.639961	no
ENSG00000074800.13	ENO1	690.977	726.683	738.266	346.528	342.041	384.12	ENSG00000074800.13	ENO1	chr1:8861001-8879894	MB468_CTRL	MB468_W2	OK	718.642	357.563	-1.00708	-5.66202	5e-05	0.000470501	yes
ENSG00000074803.17	SLC12A1	0	0	0	0	0	0	ENSG00000074803.17	SLC12A1	chr15:48189036-48304078	MB468_CTRL	MB468_W2	NOTEST	0	0	0	0	1	1	no
ENSG00000074842.7	MYDGF	24.685	21.3431	19.8064	14.064	25.5774	14.2094	ENSG00000074842.7	MYDGF	chr19:4639517-4670370	MB468_CTRL	MB468_W2	OK	21.9448	17.9503	-0.289875	-0.590448	0.2539	0.454725	no
ENSG00000074855.10	ANO8	9.45974	9.09236	11.1603	14.6387	20.1194	18.7998	ENSG00000074855.10	ANO8	chr19:17292130-17334829	MB468_CTRL	MB468_W2	OK	9.90413	17.8526	0.850035	2.24274	0.0001	0.000882755	yes
ENSG00000074935.13	TUBE1	28.2089	27.3735	27.196	45.1	55.5168	52.7735	ENSG00000074935.13	TUBE1	chr6:112054071-112087529	MB468_CTRL	MB468_W2	OK	27.5928	51.1301	0.88988	3.32263	5e-05	0.000470501	yes
ENSG00000074964.16	ARHGEF10L	2.88891	4.05017	2.18842	8.00144	5.4573	6.7635	ENSG00000074964.16	ARHGEF10L	chr1:17539834-17697874	MB468_CTRL	MB468_W2	OK	3.0425	6.74075	1.14765	1.67268	5e-05	0.000470501	yes
ENSG00000074966.10	TXK	0	0.0526554	0	0.348654	0	0	ENSG00000074966.10	TXK	chr4:48066392-48134256	MB468_CTRL	MB468_W2	NOTEST	0.0175518	0.116218	2.72714	0	1	1	no
ENSG00000075043.18	KCNQ2	0	0	0	0	0	0	ENSG00000075043.18	KCNQ2	chr20:63400209-63472677	MB468_CTRL	MB468_W2	NOTEST	0	0	0	0	1	1	no
ENSG00000075073.14	TACR2	0	0	0	0	0	0.31412	ENSG00000075073.14	TACR2	chr10:69403902-69416867	MB468_CTRL	MB468_W2	NOTEST	0	0.104707	inf	0	1	1	no
ENSG00000075089.9	ACTR6	14.6307	15.2909	12.9992	18.6215	15.3767	7.29779	ENSG00000075089.9	ACTR6	chr12:100156356-100267079	MB468_CTRL	MB468_W2	OK	14.3069	13.7653	-0.0556754	-0.0930727	0.8311	0.915419	no
ENSG00000075131.9	TIPIN	7.32766	7.65469	7.66505	4.20148	5.962	6.22554	ENSG00000075131.9	TIPIN	chr15:66336205-66386746	MB468_CTRL	MB468_W2	OK	7.54913	5.46301	-0.466615	-1.15442	0.0223	0.0793072	no
ENSG00000075142.13	SRI	61.314	66.0613	76.5339	66.517	74.1017	72.4765	ENSG00000075142.13	SRI	chr7:88205117-88306891	MB468_CTRL	MB468_W2	OK	67.9697	71.0317	0.0635713	0.177055	0.7603	0.874518	no
ENSG00000075151.20	EIF4G3	0	0.0177737	0.0621598	0.178937	0.331442	0.442044	ENSG00000075151.20	EIF4G3	chr1:20806291-21176888	MB468_CTRL	MB468_W2	NOTEST	0.0266445	0.317474	3.57473	0	1	1	no
ENSG00000075188.8	NUP37	38.091	19.4959	27.2107	16.8887	17.2944	24.7756	ENSG00000075188.8	NUP37	chr12:102063354-102120124	MB468_CTRL	MB468_W2	OK	28.2659	19.6529	-0.524318	-1.0486	0.05075	0.148392	no
ENSG00000075213.10	SEMA3A	2.93878	3.23355	1.91312	3.43644	6.84442	2.5869	ENSG00000075213.10	SEMA3A	chr7:83955776-84492724	MB468_CTRL	MB468_W2	OK	2.69515	4.28925	0.670362	0.540863	0.15525	0.328269	no
ENSG00000075218.18	GTSE1	14.3808	15.7669	15.7797	19.9522	18.1235	22.4986	ENSG00000075218.18	GTSE1	chr22:46296740-46330810	MB468_CTRL	MB468_W2	OK	15.3091	20.1914	0.399353	1.52539	0.00735	0.0327807	yes
ENSG00000075223.13	SEMA3C	8.36413	11.1948	10.3862	9.54833	19.826	10.7112	ENSG00000075223.13	SEMA3C	chr7:80742537-80922359	MB468_CTRL	MB468_W2	OK	9.98173	13.3619	0.420759	0.645519	0.17485	0.35637	no
ENSG00000075234.16	TTC38	3.26394	4.87378	3.30573	1.98264	4.21435	5.96811	ENSG00000075234.16	TTC38	chr22:46267960-46294008	MB468_CTRL	MB468_W2	OK	3.81448	4.05503	0.0882262	0.0785253	0.8341	0.916987	no
ENSG00000075239.13	ACAT1	23.2141	30.2583	44.7225	16.3261	14.5573	28.502	ENSG00000075239.13	ACAT1	chr11:108008732-108147776	MB468_CTRL	MB468_W2	OK	32.7317	19.7951	-0.725541	-1.12571	0.03215	0.105352	no
ENSG00000075240.16	GRAMD4	20.455	18.6089	13.1373	16.6056	25.6779	15.7431	ENSG00000075240.16	GRAMD4	chr22:46576011-46679790	MB468_CTRL	MB468_W2	OK	17.4004	19.3422	0.152633	0.169735	0.74725	0.866719	no
ENSG00000075275.16	CELSR1	13.0542	13.4955	10.1998	7.74578	10.1636	11.3624	ENSG00000075275.16	CELSR1	chr22:46360833-46537170	MB468_CTRL	MB468_W2	OK	12.2498	9.75727	-0.328214	-0.899471	0.0998	0.242404	no
ENSG00000075290.7	WNT8B	0	0.115322	0.236994	0	0	0	ENSG00000075290.7	WNT8B	chr10:100463040-100483744	MB468_CTRL	MB468_W2	NOTEST	0.117439	0	#NAME?	0	1	1	no
ENSG00000075292.18	ZNF638	25.9312	28.9806	36.1505	38.8174	48.2618	31.1451	ENSG00000075292.18	ZNF638	chr2:71276560-71435069	MB468_CTRL	MB468_W2	OK	30.3541	39.4081	0.3766	0.824451	0.1145	0.266539	no
ENSG00000075303.12	SLC25A40	8.84044	7.71828	9.12334	22.1824	8.20391	3.83483	ENSG00000075303.12	SLC25A40	chr7:87833567-87909541	MB468_CTRL	MB468_W2	OK	8.56069	11.4071	0.414128	0.396906	0.3787	0.585733	no
ENSG00000075336.11	TIMM21	48.4094	42.2424	41.7348	36.3634	43.1386	43.2708	ENSG00000075336.11	TIMM21	chr18:74148510-74160530	MB468_CTRL	MB468_W2	OK	44.1289	40.9243	-0.108767	-0.380038	0.505	0.695001	no
ENSG00000075340.22	ADD2	0.529858	0.172092	0.438234	0.915074	0.660557	0.218531	ENSG00000075340.22	ADD2	chr2:70607617-70768225	MB468_CTRL	MB468_W2	NOTEST	0.380061	0.598054	0.654043	0	1	1	no
ENSG00000075388.3	FGF4	0	0	0	0	0	0	ENSG00000075388.3	FGF4	chr11:69771015-69775403	MB468_CTRL	MB468_W2	NOTEST	0	0	0	0	1	1	no
ENSG00000075391.16	RASAL2	18.3734	21.224	19.8419	11.0233	13.5991	11.5232	ENSG00000075391.16	RASAL2	chr1:178094140-178499634	MB468_CTRL	MB468_W2	OK	19.8131	12.0485	-0.717598	-2.43781	0.0002	0.00163443	yes
ENSG00000075399.13	VPS9D1	8.95975	8.66134	12.2967	10.9902	12.6543	15.2604	ENSG00000075399.13	VPS9D1	chr16:89707133-89816657	MB468_CTRL	MB468_W2	OK	9.97259	12.9683	0.378948	0.56558	0.25435	0.454975	no
ENSG00000075407.18	ZNF37A	3.25853	3.45474	4.61853	3.34815	7.5516	8.47867	ENSG00000075407.18	ZNF37A	chr10:38094333-38150293	MB468_CTRL	MB468_W2	OK	3.77727	6.45947	0.774074	1.11813	0.04165	0.128293	no
ENSG00000075413.17	MARK3	10.9486	15.4595	13.3822	11.9322	22.7546	21.24	ENSG00000075413.17	MARK3	chr14:103385391-103503831	MB468_CTRL	MB468_W2	OK	13.2634	18.6423	0.491122	1.06779	0.0228	0.080725	no
ENSG00000075415.12	SLC25A3	161.426	176.636	185.006	113.998	119.55	113.305	ENSG00000075415.12	SLC25A3	chr12:98593590-98606379	MB468_CTRL	MB468_W2	OK	174.356	115.618	-0.592676	-2.75047	5e-05	0.000470501	yes
ENSG00000075420.12	FNDC3B	28.9464	31.3113	23.628	39.8866	22.7937	17.3018	ENSG00000075420.12	FNDC3B	chr3:172039627-172401665	MB468_CTRL	MB468_W2	OK	27.9619	26.6607	-0.0687465	-0.118158	0.80965	0.903357	no
ENSG00000075426.11	FOSL2	23.4858	30.4827	23.1086	14.4051	17.9299	16.4716	ENSG00000075426.11	FOSL2	chr2:28384408-28417312	MB468_CTRL	MB468_W2	OK	25.6924	16.2689	-0.659224	-2.66849	5e-05	0.000470501	yes
ENSG00000075429.8	CACNG5	0	0	0	0	0	0	ENSG00000075429.8	CACNG5	chr17:66835116-66885486	MB468_CTRL	MB468_W2	NOTEST	0	0	0	0	1	1	no
ENSG00000075461.5	CACNG4	0.486631	0.475882	0.724221	0.306924	0.412107	0	ENSG00000075461.5	CACNG4	chr17:66964909-67033398	MB468_CTRL	MB468_W2	NOTEST	0.562245	0.239677	-1.23011	0	1	1	no
ENSG00000075539.13	FRYL	24.5664	23.4275	22.9261	20.7767	34.3655	20.0261	ENSG00000075539.13	FRYL	chr4:48497360-48780322	MB468_CTRL	MB468_W2	OK	23.64	25.0561	0.0839312	0.173944	0.75235	0.869719	no
ENSG00000075568.16	TMEM131	14.9816	12.5615	14.2563	9.40228	24.7607	11.3742	ENSG00000075568.16	TMEM131	chr2:97756332-97995891	MB468_CTRL	MB468_W2	OK	13.9331	15.179	0.123563	0.180989	0.6928	0.83174	no
ENSG00000075618.17	FSCN1	4.0984	6.81624	4.99305	7.78587	8.90566	9.00807	ENSG00000075618.17	FSCN1	chr7:5592822-5606655	MB468_CTRL	MB468_W2	OK	5.30256	8.56653	0.692022	1.54625	0.0031	0.0163649	yes
ENSG00000075624.13	ACTB	6490.99	7121.77	6419.96	3783.85	3783.84	4104.17	ENSG00000075624.13	ACTB	chr7:5527150-5563784	MB468_CTRL	MB468_W2	OK	6677.57	3890.62	-0.779322	-2.82955	5e-05	0.000470501	yes
ENSG00000075643.5	MOCOS	8.23675	6.46109	8.18867	6.64235	6.63653	7.37209	ENSG00000075643.5	MOCOS	chr18:36187518-36272157	MB468_CTRL	MB468_W2	OK	7.62884	6.88365	-0.148288	-0.378547	0.4068	0.610917	no
ENSG00000075651.15	PLD1	4.15824	3.64998	2.83782	4.31434	5.17141	3.30417	ENSG00000075651.15	PLD1	chr3:171600404-171810950	MB468_CTRL	MB468_W2	OK	3.54868	4.2633	0.26469	0.177956	0.5476	0.727988	no
ENSG00000075673.11	ATP12A	0	0	0	0	0	0	ENSG00000075673.11	ATP12A	chr13:24680410-24712493	MB468_CTRL	MB468_W2	NOTEST	0	0	0	0	1	1	no
ENSG00000075702.16	WDR62	8.63828	9.49191	8.12554	17.1683	20.8952	16.1434	ENSG00000075702.16	WDR62	chr19:36054880-36105106	MB468_CTRL	MB468_W2	OK	8.75191	18.069	1.04585	4.38082	5e-05	0.000470501	yes
ENSG00000075711.20	DLG1	31.5771	39.4868	29.8876	50.0444	33.0396	38.2103	ENSG00000075711.20	DLG1	chr3:197042559-197303747	MB468_CTRL	MB468_W2	OK	33.6505	40.4314	0.26485	0.564662	0.27065	0.473841	no
ENSG00000075785.12	RAB7A	123.737	137.65	130.327	74.0302	76.6417	97.5075	ENSG00000075785.12	RAB7A	chr3:128726121-128814796	MB468_CTRL	MB468_W2	OK	130.571	82.7264	-0.658417	-3.02227	5e-05	0.000470501	yes
ENSG00000075790.10	BCAP29	19.6188	26.223	32.0627	19.2346	15.6106	20.0752	ENSG00000075790.10	BCAP29	chr7:107579556-107629550	MB468_CTRL	MB468_W2	OK	25.9682	18.3068	-0.504369	-0.432177	0.25515	0.455939	no
ENSG00000075826.16	SEC31B	0.692261	0.27364	0.59429	4.85415	4.37221	8.11553	ENSG00000075826.16	SEC31B	chr10:100486641-100559998	MB468_CTRL	MB468_W2	OK	0.520064	5.78063	3.47447	1.12915	5e-05	0.000470501	yes
ENSG00000075856.11	SART3	15.4263	17.4011	18.5466	13.4507	29.0217	23.8747	ENSG00000075856.11	SART3	chr12:108515184-108561400	MB468_CTRL	MB468_W2	OK	17.1247	22.1157	0.368997	0.920279	0.09	0.225243	no
ENSG00000075884.12	ARHGAP15	0	0	0	0	0	0	ENSG00000075884.12	ARHGAP15	chr2:143091361-143776073	MB468_CTRL	MB468_W2	NOTEST	0	0	0	0	1	1	no
ENSG00000075886.10	TUBA3D	0	0	0	0.366403	0	0	ENSG00000075886.10	TUBA3D	chr2:131464899-131492743	MB468_CTRL	MB468_W2	NOTEST	0	0.122134	inf	0	1	1	no
ENSG00000075891.21	PAX2	0.258455	0.24676	0.0825022	0.206038	0	0	ENSG00000075891.21	PAX2	chr10:100735602-100829941	MB468_CTRL	MB468_W2	NOTEST	0.195906	0.0686792	-1.51221	0	1	1	no
ENSG00000075914.12	EXOSC7	13.4987	12.3583	15.8328	13.6599	10.9687	10.8271	ENSG00000075914.12	EXOSC7	chr3:44915256-45036071	MB468_CTRL	MB468_W2	OK	13.8966	11.8185	-0.233678	-0.441697	0.38275	0.589163	no
ENSG00000075945.12	KIFAP3	6.08862	6.85892	7.19211	3.64781	3.1812	8.72345	ENSG00000075945.12	KIFAP3	chr1:169921325-170085208	MB468_CTRL	MB468_W2	OK	6.71322	5.18416	-0.372895	-0.751883	0.1382	0.303439	no
ENSG00000075975.15	MKRN2	10.1144	10.0139	12.3669	10.4808	10.7471	11.3903	ENSG00000075975.15	MKRN2	chr3:12484431-12664226	MB468_CTRL	MB468_W2	OK	10.8317	10.8727	0.00545235	0.0160919	0.9764	0.988584	no
ENSG00000076003.4	MCM6	60.3877	71.2167	79.0991	33.4564	25.5264	26.807	ENSG00000076003.4	MCM6	chr2:135839625-135876426	MB468_CTRL	MB468_W2	OK	70.2345	28.5966	-1.29634	-4.91013	5e-05	0.000470501	yes
ENSG00000076043.9	REXO2	38.617	32.5827	30.59	31.4904	41.6148	41.4367	ENSG00000076043.9	REXO2	chr11:114391442-114450279	MB468_CTRL	MB468_W2	OK	33.9299	38.1806	0.170284	0.465185	0.3799	0.586871	no
ENSG00000076053.10	RBM7	38.9479	37.3725	27.7362	30.7218	29.386	34.4455	ENSG00000076053.10	RBM7	chr11:114391442-114450279	MB468_CTRL	MB468_W2	OK	34.6855	31.5178	-0.138169	-0.360669	0.5121	0.699806	no
ENSG00000076067.11	RBMS2	4.18081	3.78879	2.7252	5.4457	4.72409	4.30735	ENSG00000076067.11	RBMS2	chr12:56521928-56636816	MB468_CTRL	MB468_W2	OK	3.56493	4.82572	0.436868	0.610182	0.15835	0.332789	no
ENSG00000076108.11	BAZ2A	28.7462	28.1848	33.2803	26.5111	55.6505	34.497	ENSG00000076108.11	BAZ2A	chr12:56521928-56636816	MB468_CTRL	MB468_W2	OK	30.0705	38.8862	0.37091	0.599507	0.2802	0.485047	no
ENSG00000076201.14	PTPN23	8.39557	11.2557	10.9469	6.52755	16.3756	14.598	ENSG00000076201.14	PTPN23	chr3:47381010-47413441	MB468_CTRL	MB468_W2	OK	10.1994	12.5004	0.293489	0.363517	0.3872	0.593098	no
ENSG00000076242.14	MLH1	10.0308	13.1357	19.3751	9.76631	12.4917	8.33432	ENSG00000076242.14	MLH1	chr3:36993331-37050918	MB468_CTRL	MB468_W2	OK	14.1806	10.1974	-0.475708	-0.52298	0.1566	0.330305	no
ENSG00000076248.10	UNG	45.0003	40.0624	42.0821	16.252	26.8271	27.7018	ENSG00000076248.10	UNG	chr12:109097573-109110992	MB468_CTRL	MB468_W2	OK	42.3816	23.5936	-0.845041	-2.22529	0.00035	0.00266809	yes
ENSG00000076258.9	FMO4	2.57021	1.88021	1.97564	0	3.84037	0.420755	ENSG00000076258.9	FMO4	chr1:171314207-171342084	MB468_CTRL	MB468_W2	NOTEST	2.14202	1.42037	-0.592702	0	1	1	no
ENSG00000076321.10	KLHL20	7.1708	5.32624	4.79365	3.32786	6.36457	5.00314	ENSG00000076321.10	KLHL20	chr1:173714940-173786702	MB468_CTRL	MB468_W2	OK	5.76356	4.89852	-0.234614	-0.358135	0.4735	0.669704	no
ENSG00000076344.15	RGS11	0	0	0.0457247	0	0	0.240741	ENSG00000076344.15	RGS11	chr16:234545-283010	MB468_CTRL	MB468_W2	NOTEST	0.0152416	0.0802469	2.39643	0	1	1	no
ENSG00000076351.12	SLC46A1	1.48589	2.7293	2.63312	3.40571	4.74023	6.32777	ENSG00000076351.12	SLC46A1	chr17:28357580-28407197	MB468_CTRL	MB468_W2	OK	2.28277	4.82457	1.07961	0.936575	0.02095	0.0755544	no
ENSG00000076356.6	PLXNA2	6.60788	11.9436	10.0722	13.8867	16.9027	11.7562	ENSG00000076356.6	PLXNA2	chr1:208022241-208244320	MB468_CTRL	MB468_W2	OK	9.54123	14.1818	0.571798	1.13306	0.04195	0.129022	no
ENSG00000076382.16	SPAG5	17.7012	24.6229	26.7252	36.3604	30.1404	43.4762	ENSG00000076382.16	SPAG5	chr17:28455751-28645454	MB468_CTRL	MB468_W2	OK	23.0164	36.659	0.671502	1.02462	0.0655	0.179398	no
ENSG00000076513.16	ANKRD13A	10.5721	16.0772	18.6552	14.927	16.4639	20.7703	ENSG00000076513.16	ANKRD13A	chr12:109999185-110073686	MB468_CTRL	MB468_W2	OK	15.1015	17.3871	0.203321	0.55145	0.30315	0.510257	no
ENSG00000076554.15	TPD52	99.7335	98.7157	118.587	71.0973	75.818	79.6894	ENSG00000076554.15	TPD52	chr8:79918716-80231232	MB468_CTRL	MB468_W2	OK	105.679	75.5349	-0.484472	-2.01318	0.00035	0.00266809	yes
ENSG00000076555.15	ACACB	7.06696	7.25757	2.7257	4.06454	4.41282	13.2047	ENSG00000076555.15	ACACB	chr12:109111217-109268226	MB468_CTRL	MB468_W2	OK	5.68341	7.22735	0.346709	0.306349	0.488	0.681111	no
ENSG00000076604.14	TRAF4	42.7543	41.6398	52.402	53.8817	61.263	48.8819	ENSG00000076604.14	TRAF4	chr17:28743983-28750958	MB468_CTRL	MB468_W2	OK	45.5987	54.6755	0.261903	0.870132	0.1186	0.27298	no
ENSG00000076641.4	PAG1	1.68592	2.66408	0.686538	0.305077	0.636142	0.874772	ENSG00000076641.4	PAG1	chr8:80967809-81112068	MB468_CTRL	MB468_W2	NOTEST	1.67885	0.60533	-1.47168	0	1	1	no
ENSG00000076650.6	GPATCH1	4.19524	4.1072	4.771	6.86048	6.04218	4.39385	ENSG00000076650.6	GPATCH1	chr19:33080879-33130542	MB468_CTRL	MB468_W2	OK	4.35781	5.7655	0.403842	0.788416	0.1341	0.29725	no
ENSG00000076662.9	ICAM3	7.86287	8.64984	9.68015	11.4803	23.4142	13.3651	ENSG00000076662.9	ICAM3	chr19:10304802-10339823	MB468_CTRL	MB468_W2	OK	8.73095	16.0865	0.881642	0.684485	0.2207	0.415166	no
ENSG00000076685.18	NT5C2	51.6526	56.0968	57.9834	68.4707	55.8538	122.207	ENSG00000076685.18	NT5C2	chr10:102918292-103193306	MB468_CTRL	MB468_W2	OK	55.2443	82.1772	0.572913	1.07154	0.07025	0.188796	no
ENSG00000076706.15	MCAM	0.401805	1.5274	0.958662	0.336719	1.23665	1.02549	ENSG00000076706.15	MCAM	chr11:119206275-119321521	MB468_CTRL	MB468_W2	NOTEST	0.962623	0.866286	-0.152127	0	1	1	no
ENSG00000076716.8	GPC4	10.4438	12.6312	9.88823	7.77036	5.52534	6.8979	ENSG00000076716.8	GPC4	chrX:133300102-133415490	MB468_CTRL	MB468_W2	OK	10.9877	6.7312	-0.706958	-3.43096	5e-05	0.000470501	yes
ENSG00000076770.14	MBNL3	26.5437	24.4366	23.3797	11.6073	8.31785	9.26296	ENSG00000076770.14	MBNL3	chrX:132203023-132489968	MB468_CTRL	MB468_W2	OK	24.7867	9.72938	-1.34914	-2.40176	5e-05	0.000470501	yes
ENSG00000076826.9	CAMSAP3	8.51781	9.69435	8.89401	8.21181	10.6035	13.5824	ENSG00000076826.9	CAMSAP3	chr19:7595901-7618304	MB468_CTRL	MB468_W2	OK	9.03539	10.7992	0.257269	0.548658	0.26335	0.465283	no
ENSG00000076864.19	RAP1GAP	1.58507	2.4525	1.98042	0.558503	1.68344	1.28938	ENSG00000076864.19	RAP1GAP	chr1:21596214-21669363	MB468_CTRL	MB468_W2	NOTEST	2.006	1.17711	-0.769071	0	1	1	no
ENSG00000076924.11	XAB2	16.7132	17.9757	18.6481	14.9232	12.2226	17.6681	ENSG00000076924.11	XAB2	chr19:7619524-7629565	MB468_CTRL	MB468_W2	OK	17.779	14.938	-0.25119	-0.875859	0.1045	0.250139	no
ENSG00000076928.17	ARHGEF1	12.8211	18.6117	12.4781	22.1735	48.3585	19.5926	ENSG00000076928.17	ARHGEF1	chr19:41883160-41930150	MB468_CTRL	MB468_W2	OK	14.6369	30.0415	1.03735	1.51016	0.0103	0.0430856	yes
ENSG00000076944.15	STXBP2	12.6893	14.3168	17.3544	22.0616	18.0226	24.5075	ENSG00000076944.15	STXBP2	chr19:7629736-7647873	MB468_CTRL	MB468_W2	OK	14.7868	21.5305	0.542072	0.965887	0.04435	0.13444	no
ENSG00000076984.17	MAP2K7	8.27577	9.42316	10.5194	8.11905	11.9132	14.5429	ENSG00000076984.17	MAP2K7	chr19:7903842-7914478	MB468_CTRL	MB468_W2	OK	9.40612	11.525	0.2931	0.62969	0.1698	0.349223	no
ENSG00000077009.13	NMRK2	0	0	0	0	0	0.524366	ENSG00000077009.13	NMRK2	chr19:3933102-3942416	MB468_CTRL	MB468_W2	NOTEST	0	0.174789	inf	0	1	1	no
ENSG00000077044.10	DGKD	7.64848	8.73548	5.51276	4.5269	9.90993	6.20646	ENSG00000077044.10	DGKD	chr2:233354506-233472104	MB468_CTRL	MB468_W2	OK	7.29891	6.8811	-0.0850416	-0.0926643	0.81085	0.903762	no
ENSG00000077063.10	CTTNBP2	0	0	0	0	0	0	ENSG00000077063.10	CTTNBP2	chr7:117465783-117874139	MB468_CTRL	MB468_W2	NOTEST	0	0	0	0	1	1	no
ENSG00000077080.9	ACTL6B	0	0	0	0	0	0	ENSG00000077080.9	ACTL6B	chr7:100643096-100656461	MB468_CTRL	MB468_W2	NOTEST	0	0	0	0	1	1	no
ENSG00000077092.18	RARB	0.635306	1.23015	1.00991	0.33003	0	0.321717	ENSG00000077092.18	RARB	chr3:25174331-25664939	MB468_CTRL	MB468_W2	NOTEST	0.958454	0.217249	-2.14136	0	1	1	no
ENSG00000077097.14	TOP2B	42.0887	39.9901	36.9355	18.3565	30.6438	34.3848	ENSG00000077097.14	TOP2B	chr3:25174331-25664939	MB468_CTRL	MB468_W2	OK	39.6714	27.7951	-0.513273	-0.965946	0.0707	0.189602	no
ENSG00000077147.14	TM9SF3	65.9266	65.9102	65.901	33.5391	72.7861	38.1114	ENSG00000077147.14	TM9SF3	chr10:96518108-96587452	MB468_CTRL	MB468_W2	OK	65.9126	48.1455	-0.453153	-0.699573	0.18445	0.369485	no
ENSG00000077150.18	NFKB2	7.08874	7.3947	5.28097	8.08817	7.65298	5.6498	ENSG00000077150.18	NFKB2	chr10:102394109-102402529	MB468_CTRL	MB468_W2	OK	6.58814	7.13032	0.114095	0.210786	0.661	0.810104	no
ENSG00000077152.9	UBE2T	37.7275	33.1081	38.0464	38.7426	59.5727	48.9531	ENSG00000077152.9	UBE2T	chr1:202331656-202341980	MB468_CTRL	MB468_W2	OK	36.294	49.0894	0.435682	1.71075	0.00315	0.016581	yes
ENSG00000077157.21	PPP1R12B	7.75209	4.96587	2.67388	7.42593	12.3363	12.8784	ENSG00000077157.21	PPP1R12B	chr1:202348698-202710417	MB468_CTRL	MB468_W2	OK	5.13061	10.8802	1.0845	0.875848	0.02915	0.0979201	no
ENSG00000077232.16	DNAJC10	23.1968	21.2547	21.3894	18.9611	18.6339	19.0822	ENSG00000077232.16	DNAJC10	chr2:182716040-182794464	MB468_CTRL	MB468_W2	OK	21.947	18.8924	-0.216215	-0.847493	0.10805	0.256194	no
ENSG00000077235.17	GTF3C1	22.5594	24.3979	21.4364	19.817	23.0609	19.3904	ENSG00000077235.17	GTF3C1	chr16:27459554-27549913	MB468_CTRL	MB468_W2	OK	22.7979	20.7561	-0.135367	-0.27289	0.60945	0.774427	no
ENSG00000077238.13	IL4R	6.18121	8.19931	5.86987	7.32032	11.7941	8.69294	ENSG00000077238.13	IL4R	chr16:27313386-27364778	MB468_CTRL	MB468_W2	OK	6.75013	9.26914	0.457519	0.541617	0.1186	0.27298	no
ENSG00000077254.14	USP33	41.9459	34.6204	42.6317	46.5879	50.5702	37.5366	ENSG00000077254.14	USP33	chr1:77695986-77759852	MB468_CTRL	MB468_W2	OK	39.7327	44.8982	0.176332	0.5379	0.2981	0.505083	no
ENSG00000077264.14	PAK3	0	0	0	0	0	0	ENSG00000077264.14	PAK3	chrX:110944284-111227361	MB468_CTRL	MB468_W2	NOTEST	0	0	0	0	1	1	no
ENSG00000077274.8	CAPN6	0	0	0	0	0	0	ENSG00000077274.8	CAPN6	chrX:111245102-111270523	MB468_CTRL	MB468_W2	NOTEST	0	0	0	0	1	1	no
ENSG00000077279.17	DCX	0	0	0	0	0	0	ENSG00000077279.17	DCX	chrX:111293778-111412429	MB468_CTRL	MB468_W2	NOTEST	0	0	0	0	1	1	no
ENSG00000077312.8	SNRPA	107.809	108.284	107.296	60.8363	78.66	75.4637	ENSG00000077312.8	SNRPA	chr19:40691528-40765389	MB468_CTRL	MB468_W2	OK	107.796	71.6533	-0.589202	-2.34514	5e-05	0.000470501	yes
ENSG00000077327.15	SPAG6	0	0	0	0	0	0	ENSG00000077327.15	SPAG6	chr10:22345444-22454224	MB468_CTRL	MB468_W2	NOTEST	0	0	0	0	1	1	no
ENSG00000077348.8	EXOSC5	28.76	29.9432	33.5626	23.3924	27.2984	24.4047	ENSG00000077348.8	EXOSC5	chr19:41262495-41425005	MB468_CTRL	MB468_W2	OK	30.7553	25.0318	-0.297071	-0.33882	0.542	0.723746	no
ENSG00000077380.15	DYNC1I2	42.8394	47.8005	57.6272	23.5428	10.6876	22.4552	ENSG00000077380.15	DYNC1I2	chr2:171687408-171748420	MB468_CTRL	MB468_W2	OK	49.4224	18.8952	-1.38715	-2.41639	5e-05	0.000470501	yes
ENSG00000077420.15	APBB1IP	0	0	0.115804	0	0	0	ENSG00000077420.15	APBB1IP	chr10:26438202-26567803	MB468_CTRL	MB468_W2	NOTEST	0.0386015	0	#NAME?	0	1	1	no
ENSG00000077454.15	LRCH4	18.1088	16.9919	17.2556	34.0297	35.6869	42.0223	ENSG00000077454.15	LRCH4	chr7:100572227-100608175	MB468_CTRL	MB468_W2	OK	17.4521	37.2463	1.0937	3.44097	5e-05	0.000470501	yes
ENSG00000077458.12	FAM76B	14.1429	7.93326	9.03603	14.6458	22.5732	10.7542	ENSG00000077458.12	FAM76B	chr11:95768941-95832693	MB468_CTRL	MB468_W2	OK	10.3707	15.9911	0.624749	0.880848	0.0828	0.212089	no
ENSG00000077463.14	SIRT6	8.98037	6.39303	8.69322	4.7114	11.6731	5.45352	ENSG00000077463.14	SIRT6	chr19:4174108-4182604	MB468_CTRL	MB468_W2	OK	8.02221	7.27936	-0.140188	-0.205412	0.66145	0.810439	no
ENSG00000077498.8	TYR	0	0	0	0	0	0	ENSG00000077498.8	TYR	chr11:89177451-89295759	MB468_CTRL	MB468_W2	NOTEST	0	0	0	0	1	1	no
ENSG00000077514.8	POLD3	18.8176	22.9973	16.7865	19.4739	20.6623	18.689	ENSG00000077514.8	POLD3	chr11:74491711-74669117	MB468_CTRL	MB468_W2	OK	19.5338	19.6084	0.00549827	0.0159131	0.97565	0.988351	no
ENSG00000077522.12	ACTN2	0	0	0	0	0	0	ENSG00000077522.12	ACTN2	chr1:236686453-236764631	MB468_CTRL	MB468_W2	NOTEST	0	0	0	0	1	1	no
ENSG00000077549.17	CAPZB	111.83	117.419	116.326	79.4057	65.2456	96.5601	ENSG00000077549.17	CAPZB	chr1:19338775-19485539	MB468_CTRL	MB468_W2	OK	115.191	80.4038	-0.518698	-2.5076	5e-05	0.000470501	yes
ENSG00000077585.13	GPR137B	13.9405	19.5008	13.2104	15.7047	18.9397	28.8972	ENSG00000077585.13	GPR137B	chr1:236142504-236281985	MB468_CTRL	MB468_W2	OK	15.5506	21.1806	0.445772	0.795625	0.1433	0.310857	no
ENSG00000077616.10	NAALAD2	0	0	0	0	0	0	ENSG00000077616.10	NAALAD2	chr11:90131514-90192894	MB468_CTRL	MB468_W2	NOTEST	0	0	0	0	1	1	no
ENSG00000077684.15	JADE1	7.82668	7.94927	6.99415	5.66931	7.17153	6.18553	ENSG00000077684.15	JADE1	chr4:128809622-129116640	MB468_CTRL	MB468_W2	OK	7.59004	6.34212	-0.259141	-0.486539	0.2326	0.429895	no
ENSG00000077713.18	SLC25A43	22.0371	22.7667	23.4444	17.0461	16.7341	21.0331	ENSG00000077713.18	SLC25A43	chrX:119399059-119454478	MB468_CTRL	MB468_W2	OK	22.7494	18.2711	-0.316264	-1.22912	0.0214	0.0768597	no
ENSG00000077721.15	UBE2A	112.619	116.379	106.724	81.9302	100.411	93.2539	ENSG00000077721.15	UBE2A	chrX:119574466-119605895	MB468_CTRL	MB468_W2	OK	111.907	91.8652	-0.284711	-1.34474	0.01855	0.0685723	no
ENSG00000077782.19	FGFR1	11.455	13.1825	10.318	22.6064	21.8853	14.3125	ENSG00000077782.19	FGFR1	chr8:38411137-38468834	MB468_CTRL	MB468_W2	OK	11.6518	19.6014	0.7504	1.27494	0.00335	0.0174162	yes
ENSG00000077800.11	FKBP6	0	0	0	0	0	0	ENSG00000077800.11	FKBP6	chr7:73328163-73358637	MB468_CTRL	MB468_W2	NOTEST	0	0	0	0	1	1	no
ENSG00000077935.16	SMC1B	0.0225901	0.0206409	0	0.0579375	0	0.0587558	ENSG00000077935.16	SMC1B	chr22:45344062-45413619	MB468_CTRL	MB468_W2	NOTEST	0.0144103	0.0388978	1.43258	0	1	1	no
ENSG00000077942.18	FBLN1	77.3604	90.6491	87.4041	62.8747	77.9375	77.615	ENSG00000077942.18	FBLN1	chr22:45502237-45601135	MB468_CTRL	MB468_W2	OK	85.1379	72.8091	-0.225683	-0.789547	0.13965	0.305379	no
ENSG00000077943.7	ITGA8	0	0	0	0	0	0	ENSG00000077943.7	ITGA8	chr10:15513948-15720125	MB468_CTRL	MB468_W2	NOTEST	0	0	0	0	1	1	no
ENSG00000077984.5	CST7	0.21559	0	0.200116	0	0	1.15868	ENSG00000077984.5	CST7	chr20:24949229-24959928	MB468_CTRL	MB468_W2	NOTEST	0.138569	0.386225	1.47884	0	1	1	no
ENSG00000078018.19	MAP2	2.52225	2.80921	3.75783	2.20539	4.38655	1.18962	ENSG00000078018.19	MAP2	chr2:209424057-209734118	MB468_CTRL	MB468_W2	OK	3.02976	2.59385	-0.224108	-0.165944	0.5797	0.751341	no
ENSG00000078043.15	PIAS2	11.4192	10.9237	11.1112	13.6083	14.5438	10.3295	ENSG00000078043.15	PIAS2	chr18:46803223-47102243	MB468_CTRL	MB468_W2	OK	11.1513	12.8272	0.201988	0.380171	0.39535	0.600612	no
ENSG00000078053.16	AMPH	0	0	0	0	0	0	ENSG00000078053.16	AMPH	chr7:38383703-38631567	MB468_CTRL	MB468_W2	NOTEST	0	0	0	0	1	1	no
ENSG00000078061.12	ARAF	27.2016	23.7389	24.4788	18.1368	27.5782	26.4881	ENSG00000078061.12	ARAF	chrX:47561099-47619853	MB468_CTRL	MB468_W2	OK	25.1398	24.0677	-0.0628748	-0.200739	0.71605	0.846821	no
ENSG00000078070.12	MCCC1	5.8571	5.89507	6.01678	6.3428	8.39584	8.95209	ENSG00000078070.12	MCCC1	chr3:183015217-183116075	MB468_CTRL	MB468_W2	OK	5.92298	7.89691	0.414964	0.383279	0.2808	0.485741	no
ENSG00000078081.7	LAMP3	2.60197	3.39081	5.51036	1.07013	2.05073	2.64053	ENSG00000078081.7	LAMP3	chr3:183122212-183163839	MB468_CTRL	MB468_W2	OK	3.83438	1.92047	-0.997537	-0.927067	0.0407	0.125959	no
ENSG00000078098.13	FAP	0.721125	0.219779	0.706853	1.83048	4.84075	0.958626	ENSG00000078098.13	FAP	chr2:162159761-162245151	MB468_CTRL	MB468_W2	NOTEST	0.549252	2.54328	2.21115	0	1	1	no
ENSG00000078114.18	NEBL	17.3829	17.4546	18.7526	24.2106	27.5681	19.2725	ENSG00000078114.18	NEBL	chr10:20779972-21175048	MB468_CTRL	MB468_W2	OK	17.8633	23.6837	0.406892	0.943629	0.08145	0.209598	no
ENSG00000078124.11	ACER3	20.9062	22.4863	29.5739	26.396	25.2072	24.3146	ENSG00000078124.11	ACER3	chr11:76860866-77026797	MB468_CTRL	MB468_W2	OK	24.3221	25.3059	0.0572068	0.126166	0.80955	0.903328	no
ENSG00000078140.13	UBE2K	25.2488	26.8342	25.8768	19.0969	15.1517	23.7476	ENSG00000078140.13	UBE2K	chr4:39698043-39782792	MB468_CTRL	MB468_W2	OK	25.9866	19.3321	-0.42677	-1.78207	0.0021	0.0118853	yes
ENSG00000078142.11	PIK3C3	6.3904	7.54458	14.1352	7.14939	9.67691	11.6135	ENSG00000078142.11	PIK3C3	chr18:41955205-42087830	MB468_CTRL	MB468_W2	OK	9.35673	9.47994	0.0188737	0.0221684	0.96095	0.981052	no
ENSG00000078177.13	N4BP2	1.9236	2.16651	2.06883	1.49375	2.07928	1.13199	ENSG00000078177.13	N4BP2	chr4:40042916-40158252	MB468_CTRL	MB468_W2	NOTEST	2.05298	1.56834	-0.388482	0	1	1	no
ENSG00000078237.6	TIGAR	4.92114	4.09914	4.16971	4.71939	2.01843	3.88306	ENSG00000078237.6	TIGAR	chr12:4307762-4354593	MB468_CTRL	MB468_W2	OK	4.39666	3.54029	-0.31254	-0.324158	0.4044	0.608709	no
ENSG00000078246.16	TULP3	6.80671	6.4303	8.29549	5.56388	9.90111	5.42665	ENSG00000078246.16	TULP3	chr12:1946053-2941140	MB468_CTRL	MB468_W2	OK	7.1775	6.96388	-0.0435902	-0.049656	0.9102	0.956386	no
ENSG00000078269.13	SYNJ2	3.35794	3.08589	3.63253	3.84576	5.60025	4.80916	ENSG00000078269.13	SYNJ2	chr6:157981886-158099176	MB468_CTRL	MB468_W2	OK	3.35879	4.75173	0.50051	0.912677	0.04235	0.129903	no
ENSG00000078295.16	ADCY2	0	0.017909	0	0	0	0	ENSG00000078295.16	ADCY2	chr5:7396207-7830081	MB468_CTRL	MB468_W2	NOTEST	0.00596965	0	#NAME?	0	1	1	no
ENSG00000078304.19	PPP2R5C	38.3081	41.1497	32.4244	41.67	51.7756	26.5957	ENSG00000078304.19	PPP2R5C	chr14:101761797-101927989	MB468_CTRL	MB468_W2	OK	37.2941	40.0138	0.101549	0.226187	0.6197	0.781787	no
ENSG00000078319.8	PMS2P1	5.49106	6.08585	2.31396	7.74349	8.25783	4.32693	ENSG00000078319.8	PMS2P1	chr7:100307701-100400099	MB468_CTRL	MB468_W2	OK	4.63029	6.77609	0.54935	0.53655	0.3691	0.576382	no
ENSG00000078328.19	RBFOX1	0	0	0	0	0	0	ENSG00000078328.19	RBFOX1	chr16:5239801-7713338	MB468_CTRL	MB468_W2	NOTEST	0	0	0	0	1	1	no
ENSG00000078369.17	GNB1	148.306	145.238	164.829	109.312	116.83	138.435	ENSG00000078369.17	GNB1	chr1:1785284-1891117	MB468_CTRL	MB468_W2	OK	152.791	121.525	-0.330299	-1.53353	0.0074	0.0329476	yes
ENSG00000078399.16	HOXA9	0.210841	0	0.462069	0.694366	0	0	ENSG00000078399.16	HOXA9	chr7:27162434-27180261	MB468_CTRL	MB468_W2	NOTEST	0.224303	0.231455	0.0452824	0	1	1	no
ENSG00000078401.6	EDN1	20.5285	16.7449	20.6735	11.7847	12.4393	13.38	ENSG00000078401.6	EDN1	chr6:12290362-12297194	MB468_CTRL	MB468_W2	OK	19.3157	12.5347	-0.623847	-2.99875	5e-05	0.000470501	yes
ENSG00000078403.16	MLLT10	6.60733	7.55527	4.64365	12.2641	10.1337	11.2908	ENSG00000078403.16	MLLT10	chr10:21513477-21743630	MB468_CTRL	MB468_W2	OK	6.26875	11.2295	0.841045	0.772907	0.01675	0.0633758	no
ENSG00000078487.17	ZCWPW1	2.52329	4.48636	4.26033	2.88859	9.51722	1.87199	ENSG00000078487.17	ZCWPW1	chr7:100400825-100434126	MB468_CTRL	MB468_W2	OK	3.75666	4.75927	0.341289	0.306786	0.55275	0.731611	no
ENSG00000078549.14	ADCYAP1R1	0	0	0	0	0	0	ENSG00000078549.14	ADCYAP1R1	chr7:31052460-31111479	MB468_CTRL	MB468_W2	NOTEST	0	0	0	0	1	1	no
ENSG00000078579.8	FGF20	0	0	0	0	0	0	ENSG00000078579.8	FGF20	chr8:16992168-17002181	MB468_CTRL	MB468_W2	NOTEST	0	0	0	0	1	1	no
ENSG00000078589.12	P2RY10	0	0	0	0	0	0	ENSG00000078589.12	P2RY10	chrX:78945331-78961954	MB468_CTRL	MB468_W2	NOTEST	0	0	0	0	1	1	no
ENSG00000078596.10	ITM2A	0	0	0	0	0	0	ENSG00000078596.10	ITM2A	chrX:79360383-79367667	MB468_CTRL	MB468_W2	NOTEST	0	0	0	0	1	1	no
ENSG00000078618.20	NRDC	58.2456	61.8438	64.5069	55.607	77.0646	67.001	ENSG00000078618.20	NRDC	chr1:51561865-51878937	MB468_CTRL	MB468_W2	OK	61.5321	66.5575	0.113263	0.327814	0.5088	0.697533	no
ENSG00000078668.13	VDAC3	34.8002	42.8411	41.081	33.9154	48.428	37.2015	ENSG00000078668.13	VDAC3	chr8:42391623-42405897	MB468_CTRL	MB468_W2	OK	39.5741	39.8483	0.0099609	0.0375104	0.9421	0.97196	no
ENSG00000078674.17	PCM1	42.1473	47.7257	38.9431	38.7704	41.0205	39.0563	ENSG00000078674.17	PCM1	chr8:17922839-18029944	MB468_CTRL	MB468_W2	OK	42.9387	39.6157	-0.116206	-0.267107	0.60925	0.774253	no
ENSG00000078687.17	TNRC6C	2.13882	4.27577	4.00104	2.4702	4.59805	5.04756	ENSG00000078687.17	TNRC6C	chr17:77959239-78142968	MB468_CTRL	MB468_W2	OK	3.47188	4.0386	0.218141	0.20969	0.6513	0.803509	no
ENSG00000078699.21	CBFA2T2	6.12979	11.2705	8.08236	4.00253	9.72907	10.4654	ENSG00000078699.21	CBFA2T2	chr20:33490074-33650036	MB468_CTRL	MB468_W2	OK	8.49422	8.06565	-0.0746899	-0.131377	0.8155	0.906243	no
ENSG00000078725.12	BRINP1	0	0	0	0	0	0	ENSG00000078725.12	BRINP1	chr9:119153457-119369467	MB468_CTRL	MB468_W2	NOTEST	0	0	0	0	1	1	no
ENSG00000078747.13	ITCH	11.9679	11.8679	14.8782	11.4479	18.0665	19.3502	ENSG00000078747.13	ITCH	chr20:34363234-34511393	MB468_CTRL	MB468_W2	OK	12.9047	16.2882	0.335935	0.67222	0.18525	0.3705	no
ENSG00000078795.16	PKD2L2	0	0	0	0	0	0	ENSG00000078795.16	PKD2L2	chr5:137814332-138051961	MB468_CTRL	MB468_W2	NOTEST	0	0	0	0	1	1	no
ENSG00000078804.12	TP53INP2	6.95409	9.55104	8.33221	4.47073	6.59467	4.74575	ENSG00000078804.12	TP53INP2	chr20:34560541-34825649	MB468_CTRL	MB468_W2	OK	8.27911	5.27038	-0.651569	-0.965505	0.0782	0.203767	no
ENSG00000078808.16	SDF4	104.692	123.747	126.159	72.586	107.892	98.2862	ENSG00000078808.16	SDF4	chr1:1216907-1232031	MB468_CTRL	MB468_W2	OK	118.199	92.9215	-0.347137	-2.13711	0.0004	0.00299751	yes
ENSG00000078814.15	MYH7B	0	0	0.0150494	0	0.0484355	0.0430175	ENSG00000078814.15	MYH7B	chr20:34975402-35092871	MB468_CTRL	MB468_W2	NOTEST	0.00501646	0.0304843	2.60333	0	1	1	no
ENSG00000078898.6	BPIFB2	0	0	0	0	0	0	ENSG00000078898.6	BPIFB2	chr20:33007599-33023709	MB468_CTRL	MB468_W2	NOTEST	0	0	0	0	1	1	no
ENSG00000078900.14	TP73	3.82012	5.16623	4.24251	3.25402	4.46484	3.41588	ENSG00000078900.14	TP73	chr1:3630766-3771645	MB468_CTRL	MB468_W2	OK	4.40962	3.71158	-0.24862	-0.45856	0.3278	0.535789	no
ENSG00000078902.15	TOLLIP	15.8677	13.0193	12.0374	7.47552	8.07336	12.2425	ENSG00000078902.15	TOLLIP	chr11:1274370-1309654	MB468_CTRL	MB468_W2	OK	13.6415	9.26379	-0.558325	-0.855387	0.0777	0.202926	no
ENSG00000078967.12	UBE2D4	9.42992	8.42275	10.6103	12.7913	13.3209	11.1769	ENSG00000078967.12	UBE2D4	chr7:43926437-44019175	MB468_CTRL	MB468_W2	OK	9.48765	12.4297	0.389666	0.853699	0.0853	0.216556	no
ENSG00000079101.16	CLUL1	0	0.0444462	0.467001	0	0.412256	0	ENSG00000079101.16	CLUL1	chr18:596987-712676	MB468_CTRL	MB468_W2	NOTEST	0.170483	0.137419	-0.311044	0	1	1	no
ENSG00000079102.16	RUNX1T1	0	0.181661	0.0366832	0	0	0	ENSG00000079102.16	RUNX1T1	chr8:91954966-92103286	MB468_CTRL	MB468_W2	NOTEST	0.0727813	0	#NAME?	0	1	1	no
ENSG00000079112.9	CDH17	0	0	0	0	0	0	ENSG00000079112.9	CDH17	chr8:94127170-94217303	MB468_CTRL	MB468_W2	NOTEST	0	0	0	0	1	1	no
ENSG00000079134.11	THOC1	36.0772	42.921	48.7595	67.7088	88.4364	99.0833	ENSG00000079134.11	THOC1	chr18:158382-268050	MB468_CTRL	MB468_W2	OK	42.5859	85.0762	0.998379	1.76223	0.00235	0.0130326	yes
ENSG00000079150.17	FKBP7	1.40521	1.25499	2.16045	2.8368	1.06753	4.08523	ENSG00000079150.17	FKBP7	chr2:178463663-178478600	MB468_CTRL	MB468_W2	NOTEST	1.60689	2.66319	0.728887	0	1	1	no
ENSG00000079156.16	OSBPL6	3.79324	4.04385	5.10944	2.87308	9.38329	2.53432	ENSG00000079156.16	OSBPL6	chr2:178194480-178402891	MB468_CTRL	MB468_W2	OK	4.31551	4.93023	0.192123	0.180461	0.7167	0.847129	no
ENSG00000079215.13	SLC1A3	64.1981	57.3253	60.3172	61.8894	37.4433	50.3405	ENSG00000079215.13	SLC1A3	chr5:36606354-36725195	MB468_CTRL	MB468_W2	OK	60.6135	49.8911	-0.280858	-0.80388	0.1429	0.310301	no
ENSG00000079246.15	XRCC5	94.1595	94.4354	95.2824	49.178	54.7175	64.395	ENSG00000079246.15	XRCC5	chr2:216107463-216206303	MB468_CTRL	MB468_W2	OK	94.6258	56.0968	-0.754314	-2.73051	5e-05	0.000470501	yes
ENSG00000079257.7	LXN	15.9079	15.9815	21.1876	18.1965	21.2023	17.9775	ENSG00000079257.7	LXN	chr3:158644277-158692575	MB468_CTRL	MB468_W2	OK	17.6924	19.1254	0.112366	0.374085	0.49975	0.691071	no
ENSG00000079263.18	SP140	0	0.0285505	0	0	0	0	ENSG00000079263.18	SP140	chr2:230121369-230313215	MB468_CTRL	MB468_W2	NOTEST	0.00951685	0	#NAME?	0	1	1	no
ENSG00000079277.19	MKNK1	21.2959	27.7913	19.7019	22.7208	39.4535	41.6024	ENSG00000079277.19	MKNK1	chr1:46538695-46616891	MB468_CTRL	MB468_W2	OK	22.9297	34.5922	0.593232	1.47071	0.0046	0.022534	yes
ENSG00000079308.16	TNS1	4.97849	7.80911	5.83264	15.8447	8.75798	4.36587	ENSG00000079308.16	TNS1	chr2:217799788-218002995	MB468_CTRL	MB468_W2	OK	6.20675	9.65619	0.637617	0.70969	0.12245	0.279124	no
ENSG00000079313.12	REXO1	17.6482	16.5423	12.2998	12.2373	19.2887	32.3786	ENSG00000079313.12	REXO1	chr19:1815245-1848463	MB468_CTRL	MB468_W2	OK	15.4968	21.3015	0.458988	0.717308	0.1182	0.272298	no
ENSG00000079332.14	SAR1A	45.7944	45.7145	50.6922	44.3967	53.1136	49.7246	ENSG00000079332.14	SAR1A	chr10:70147288-70170523	MB468_CTRL	MB468_W2	OK	47.4004	49.0783	0.0501863	0.228868	0.65585	0.80676	no
ENSG00000079335.18	CDC14A	1.83376	2.25188	2.32473	3.03747	4.17144	3.25371	ENSG00000079335.18	CDC14A	chr1:100344476-100520277	MB468_CTRL	MB468_W2	OK	2.13679	3.48754	0.706765	1.11368	0.0163	0.0620768	no
ENSG00000079337.15	RAPGEF3	3.48475	1.91702	2.21874	3.60012	5.57529	4.55751	ENSG00000079337.15	RAPGEF3	chr12:47706084-47837898	MB468_CTRL	MB468_W2	OK	2.54017	4.57764	0.849678	0.796097	0.04165	0.128293	no
ENSG00000079385.21	CEACAM1	4.87639	2.42662	3.34131	6.83253	3.92041	8.29289	ENSG00000079385.21	CEACAM1	chr19:42397127-42652355	MB468_CTRL	MB468_W2	OK	3.54811	6.34861	0.839392	0.775685	0.02965	0.0991634	no
ENSG00000079387.13	SENP1	8.38061	11.1305	10.5684	8.61435	17.6623	6.54106	ENSG00000079387.13	SENP1	chr12:48042897-48146404	MB468_CTRL	MB468_W2	OK	10.0265	10.9392	0.125696	0.188511	0.66765	0.814821	no
ENSG00000079393.20	DUSP13	0	0.183734	0	0	0	0	ENSG00000079393.20	DUSP13	chr10:75094431-75182123	MB468_CTRL	MB468_W2	NOTEST	0.0612448	0	#NAME?	0	1	1	no
ENSG00000079432.7	CIC	22.7872	23.8554	24.6094	20.4439	29.0901	31.2671	ENSG00000079432.7	CIC	chr19:42268536-42295797	MB468_CTRL	MB468_W2	OK	23.7507	26.9337	0.181445	0.728588	0.17405	0.355372	no
ENSG00000079435.9	LIPE	5.10294	4.65874	0.633863	3.74416	6.4313	11.9079	ENSG00000079435.9	LIPE	chr19:42397127-42652355	MB468_CTRL	MB468_W2	OK	3.46518	7.36111	1.08699	0.998365	0.0525	0.152221	no
ENSG00000079459.12	FDFT1	120.023	133.562	111.522	63.6256	64.6518	82.6213	ENSG00000079459.12	FDFT1	chr8:11795572-11839309	MB468_CTRL	MB468_W2	OK	121.702	70.2996	-0.791768	-3.17844	5e-05	0.000470501	yes
ENSG00000079462.7	PAFAH1B3	70.0001	66.2519	76.5198	56.0424	71.6767	53.039	ENSG00000079462.7	PAFAH1B3	chr19:42297032-42310821	MB468_CTRL	MB468_W2	OK	70.9239	60.2527	-0.235246	-1.0156	0.07605	0.199927	no
ENSG00000079482.12	OPHN1	5.16487	6.55513	4.7196	8.21261	12.2786	4.7279	ENSG00000079482.12	OPHN1	chrX:68042343-68433913	MB468_CTRL	MB468_W2	OK	5.47987	8.40638	0.617344	0.594208	0.17995	0.36337	no
ENSG00000079557.4	AFM	0	0	0	0	0	0	ENSG00000079557.4	AFM	chr4:73481682-73504001	MB468_CTRL	MB468_W2	NOTEST	0	0	0	0	1	1	no
ENSG00000079616.12	KIF22	23.2651	24.2825	29.1454	22.7423	42.2687	31.4237	ENSG00000079616.12	KIF22	chr16:29790718-29805385	MB468_CTRL	MB468_W2	OK	25.5644	32.1449	0.330458	0.959343	0.09415	0.232627	no
ENSG00000079689.13	SCGN	0	0	0	0	0	0	ENSG00000079689.13	SCGN	chr6:25652200-25701783	MB468_CTRL	MB468_W2	NOTEST	0	0	0	0	1	1	no
ENSG00000079691.17	LRRC16A	19.5997	21.2904	20.8173	13.5882	16.8206	12.63	ENSG00000079691.17	LRRC16A	chr6:25279077-25620530	MB468_CTRL	MB468_W2	OK	20.5691	14.3463	-0.519804	-1.4946	0.01225	0.0495024	yes
ENSG00000079739.15	PGM1	43.6052	49.3659	46.551	27.6677	19.3801	24.9129	ENSG00000079739.15	PGM1	chr1:63440769-63660245	MB468_CTRL	MB468_W2	OK	46.5074	23.9869	-0.955213	-2.34456	0.00165	0.00974473	yes
ENSG00000079785.14	DDX1	43.4054	41.906	47.3649	27.5577	21.0578	24.3935	ENSG00000079785.14	DDX1	chr2:15591177-15631111	MB468_CTRL	MB468_W2	OK	44.2254	24.3363	-0.861764	-3.23512	5e-05	0.000470501	yes
ENSG00000079805.16	DNM2	115.952	99.4349	99.3924	111.609	126.146	118.698	ENSG00000079805.16	DNM2	chr19:10718078-10836318	MB468_CTRL	MB468_W2	OK	104.927	118.818	0.179369	0.511173	0.35925	0.567235	no
ENSG00000079819.17	EPB41L2	13.684	19.9811	14.1946	19.6135	18.2443	16.7894	ENSG00000079819.17	EPB41L2	chr6:130839346-131063322	MB468_CTRL	MB468_W2	OK	15.9532	18.2158	0.191337	0.389246	0.422	0.625087	no
ENSG00000079841.18	RIMS1	0	0.0204899	0	0.118462	0.146139	0.0596409	ENSG00000079841.18	RIMS1	chr6:71886702-72403143	MB468_CTRL	MB468_W2	NOTEST	0.00682997	0.108081	3.98408	0	1	1	no
ENSG00000079931.14	MOXD1	0.312793	0.0629364	1.12974	1.29383	0	0	ENSG00000079931.14	MOXD1	chr6:132296054-132401545	MB468_CTRL	MB468_W2	NOTEST	0.501824	0.431278	-0.218563	0	1	1	no
ENSG00000079950.13	STX7	12.9317	15.7682	12.4079	14.0039	17.0585	10.5654	ENSG00000079950.13	STX7	chr6:132445866-132513198	MB468_CTRL	MB468_W2	OK	13.7026	13.8759	0.018138	0.0547523	0.923	0.962578	no
ENSG00000079974.17	RABL2B	5.79647	6.75409	7.97671	13.7341	9.1785	8.32359	ENSG00000079974.17	RABL2B	chr22:50756947-50801309	MB468_CTRL	MB468_W2	OK	6.84242	10.4121	0.605678	1.03411	0.03265	0.106467	no
ENSG00000079999.13	KEAP1	85.0148	91.0841	95.455	52.2568	60.177	59.505	ENSG00000079999.13	KEAP1	chr19:10486119-10503741	MB468_CTRL	MB468_W2	OK	90.518	57.3129	-0.659344	-2.97254	5e-05	0.000470501	yes
ENSG00000080007.7	DDX43	0	0	0	0	0	0	ENSG00000080007.7	DDX43	chr6:73368554-73452276	MB468_CTRL	MB468_W2	NOTEST	0	0	0	0	1	1	no
ENSG00000080031.9	PTPRH	0.482262	1.6956	0.799699	0.746109	0.54434	1.95768	ENSG00000080031.9	PTPRH	chr19:55181247-55209506	MB468_CTRL	MB468_W2	NOTEST	0.99252	1.08271	0.12548	0	1	1	no
ENSG00000080166.15	DCT	0	0	0	0	0	0	ENSG00000080166.15	DCT	chr13:94436807-94479682	MB468_CTRL	MB468_W2	NOTEST	0	0	0	0	1	1	no
ENSG00000080189.14	SLC35C2	42.8289	35.0801	30.703	11.554	32.0611	27.048	ENSG00000080189.14	SLC35C2	chr20:46345979-46364458	MB468_CTRL	MB468_W2	OK	36.204	23.5544	-0.620154	-1.57338	0.0074	0.0329476	yes
ENSG00000080200.9	CRYBG3	4.93313	5.85643	4.76748	4.49196	3.96723	4.98524	ENSG00000080200.9	CRYBG3	chr3:97822039-97972457	MB468_CTRL	MB468_W2	OK	5.18568	4.48148	-0.21056	-0.641217	0.2033	0.39319	no
ENSG00000080224.17	EPHA6	0.575979	0.527256	0.367652	0	0.89642	1.34193	ENSG00000080224.17	EPHA6	chr3:96814580-97752460	MB468_CTRL	MB468_W2	NOTEST	0.490295	0.746118	0.605752	0	1	1	no
ENSG00000080298.15	RFX3	1.67227	0.807309	1.12357	2.08896	2.56276	0.940165	ENSG00000080298.15	RFX3	chr9:3218296-3526004	MB468_CTRL	MB468_W2	NOTEST	1.20105	1.86396	0.634077	0	1	1	no
ENSG00000080345.17	RIF1	31.0929	25.8009	27.992	20.6675	23.706	16.306	ENSG00000080345.17	RIF1	chr2:151409882-151734487	MB468_CTRL	MB468_W2	OK	28.2953	20.2265	-0.484316	-1.21231	0.03525	0.112926	no
ENSG00000080371.5	RAB21	11.0341	10.0369	11.6471	8.09622	5.07798	4.27963	ENSG00000080371.5	RAB21	chr12:71754873-71800285	MB468_CTRL	MB468_W2	OK	10.906	5.81794	-0.906546	-1.2919	0.01195	0.0485363	yes
ENSG00000080493.14	SLC4A4	0.629958	0.645166	1.16448	0.127952	0.157455	0.387116	ENSG00000080493.14	SLC4A4	chr4:71186756-71572087	MB468_CTRL	MB468_W2	NOTEST	0.813202	0.224175	-1.85899	0	1	1	no
ENSG00000080503.21	SMARCA2	21.6293	22.7503	29.7186	17.8555	31.8631	24.6743	ENSG00000080503.21	SMARCA2	chr9:1980289-2193624	MB468_CTRL	MB468_W2	OK	24.6994	24.7976	0.00572618	0.00619049	0.98445	0.992383	no
ENSG00000080511.3	RDH8	0	0	0	0	0	0	ENSG00000080511.3	RDH8	chr19:10013248-10022279	MB468_CTRL	MB468_W2	NOTEST	0	0	0	0	1	1	no
ENSG00000080546.13	SESN1	2.75646	4.48242	3.75173	3.70894	2.24162	3.24284	ENSG00000080546.13	SESN1	chr6:108986436-109094819	MB468_CTRL	MB468_W2	OK	3.66354	3.06447	-0.2576	-0.275579	0.4818	0.67651	no
ENSG00000080561.13	MID2	10.0498	9.3107	8.95791	8.0618	11.0193	5.66525	ENSG00000080561.13	MID2	chrX:107825754-107935980	MB468_CTRL	MB468_W2	OK	9.43947	8.24878	-0.194526	-0.277385	0.598	0.765023	no
ENSG00000080572.12	PIH1D3	0	0	0	0	0	0	ENSG00000080572.12	PIH1D3	chrX:107206631-107244243	MB468_CTRL	MB468_W2	NOTEST	0	0	0	0	1	1	no
ENSG00000080573.6	COL5A3	0	0	0	0	0	0	ENSG00000080573.6	COL5A3	chr19:9959560-10010471	MB468_CTRL	MB468_W2	NOTEST	0	0	0	0	1	1	no
ENSG00000080603.16	SRCAP	24.5668	22.5797	22.1205	18.9537	25.1479	25.1062	ENSG00000080603.16	SRCAP	chr16:30697706-30776307	MB468_CTRL	MB468_W2	OK	23.089	23.0693	-0.00123336	-0.00223727	0.99645	0.997975	no
ENSG00000080608.9	PUM3	26.5896	30.6337	31.0236	19.4865	15.3722	31.2616	ENSG00000080608.9	PUM3	chr9:2717501-2844241	MB468_CTRL	MB468_W2	OK	29.4157	22.0401	-0.416454	-0.708344	0.1858	0.370993	no
ENSG00000080618.13	CPB2	0	0	0	0	0	0	ENSG00000080618.13	CPB2	chr13:46052805-46113332	MB468_CTRL	MB468_W2	NOTEST	0	0	0	0	1	1	no
ENSG00000080644.15	CHRNA3	0	0.396663	0	0	0	0	ENSG00000080644.15	CHRNA3	chr15:78565519-78621295	MB468_CTRL	MB468_W2	NOTEST	0.132221	0	#NAME?	0	1	1	no
ENSG00000080709.14	KCNN2	0	0	0	0	0.263127	0	ENSG00000080709.14	KCNN2	chr5:114360944-114668410	MB468_CTRL	MB468_W2	NOTEST	0	0.087709	inf	0	1	1	no
ENSG00000080802.18	CNOT4	15.5541	12.1802	13.4495	14.4775	19.3209	9.54201	ENSG00000080802.18	CNOT4	chr7:135361794-135510127	MB468_CTRL	MB468_W2	OK	13.7279	14.4468	0.0736363	0.167548	0.74515	0.865323	no
ENSG00000080815.18	PSEN1	14.15	13.6699	14.7193	9.79474	10.6195	10.3861	ENSG00000080815.18	PSEN1	chr14:73136417-73223691	MB468_CTRL	MB468_W2	OK	14.1797	10.2668	-0.465842	-1.00658	0.0122	0.049333	yes
ENSG00000080819.6	CPOX	15.1817	16.8258	15.4617	9.17	26.2932	16.2845	ENSG00000080819.6	CPOX	chr3:98497603-98593723	MB468_CTRL	MB468_W2	OK	15.823	17.2492	0.124505	0.154267	0.60685	0.772328	no
ENSG00000080822.16	CLDND1	32.132	34.0985	37.4938	51.3789	47.8333	47.728	ENSG00000080822.16	CLDND1	chr3:98497603-98593723	MB468_CTRL	MB468_W2	OK	34.5747	48.98	0.502476	1.36164	0.0064	0.029432	yes
ENSG00000080823.21	MOK	25.5381	36.9215	31.1891	38.9419	34.3499	25.0301	ENSG00000080823.21	MOK	chr14:102080737-102305200	MB468_CTRL	MB468_W2	OK	31.2162	32.774	0.0702548	0.0336384	0.8928	0.947995	no
ENSG00000080824.18	HSP90AA1	795.737	746.27	870.049	392.527	276.557	392.08	ENSG00000080824.18	HSP90AA1	chr14:102080737-102305200	MB468_CTRL	MB468_W2	OK	804.019	353.721	-1.18462	-2.70019	5e-05	0.000470501	yes
ENSG00000080839.11	RBL1	10.2893	14.4807	8.85557	8.1654	11.3522	10.2792	ENSG00000080839.11	RBL1	chr20:36996348-37097178	MB468_CTRL	MB468_W2	OK	11.2085	9.93225	-0.174407	-0.330265	0.5095	0.69797	no
ENSG00000080845.17	DLGAP4	21.1304	19.118	20.4023	16.7428	31.4846	25.5726	ENSG00000080845.17	DLGAP4	chr20:36306335-36573391	MB468_CTRL	MB468_W2	OK	20.2169	24.6	0.283096	1.16922	0.02345	0.0824846	no
ENSG00000080854.14	IGSF9B	0	0	0	0	0	0	ENSG00000080854.14	IGSF9B	chr11:133908563-133956985	MB468_CTRL	MB468_W2	NOTEST	0	0	0	0	1	1	no
ENSG00000080947.14	CROCCP3	0.531303	3.30841	0.84271	2.82439	3.96751	7.87791	ENSG00000080947.14	CROCCP3	chr1:16460947-16499257	MB468_CTRL	MB468_W2	OK	1.56081	4.88994	1.64752	1.14718	0.0277	0.0940666	no
ENSG00000080986.12	NDC80	39.0526	35.0131	49.3956	70.7785	45.8648	44.4749	ENSG00000080986.12	NDC80	chr18:2571510-2616635	MB468_CTRL	MB468_W2	OK	41.1538	53.7061	0.384061	0.645515	0.2434	0.443042	no
ENSG00000081014.10	AP4E1	7.6627	6.15644	6.47527	9.10629	5.79645	4.42201	ENSG00000081014.10	AP4E1	chr15:50908671-51005900	MB468_CTRL	MB468_W2	OK	6.76481	6.44158	-0.0706327	-0.11232	0.8128	0.904724	no
ENSG00000081019.13	RSBN1	8.10686	7.61281	6.63356	4.61127	5.52977	6.18126	ENSG00000081019.13	RSBN1	chr1:113761831-113914086	MB468_CTRL	MB468_W2	OK	7.45107	5.44077	-0.453638	-0.851212	0.1016	0.245377	no
ENSG00000081026.18	MAGI3	19.7713	23.299	16.4372	17.1961	10.7148	15.0617	ENSG00000081026.18	MAGI3	chr1:113390748-113685923	MB468_CTRL	MB468_W2	OK	19.8358	14.3242	-0.469651	-1.20697	0.03985	0.123883	no
ENSG00000081041.8	CXCL2	1.90331	1.75905	1.53242	4.23607	4.26175	5.98984	ENSG00000081041.8	CXCL2	chr4:74097034-74099293	MB468_CTRL	MB468_W2	OK	1.7316	4.82922	1.47969	1.09246	0.03295	0.107045	no
ENSG00000081051.7	AFP	0	0	0	0	0	0	ENSG00000081051.7	AFP	chr4:73431137-73456174	MB468_CTRL	MB468_W2	NOTEST	0	0	0	0	1	1	no
ENSG00000081052.11	COL4A4	0.458974	0.446058	0.522566	0.412686	0.161	0.544957	ENSG00000081052.11	COL4A4	chr2:227002710-227164113	MB468_CTRL	MB468_W2	NOTEST	0.475866	0.372881	-0.35184	0	1	1	no
ENSG00000081059.19	TCF7	11.1223	11.021	7.7677	5.77023	8.57736	10.0952	ENSG00000081059.19	TCF7	chr5:134114710-134371047	MB468_CTRL	MB468_W2	OK	9.97034	8.1476	-0.291268	-0.208956	0.4808	0.675831	no
ENSG00000081087.14	OSTM1	12.0494	14.4958	9.13406	15.2594	11.587	10.5865	ENSG00000081087.14	OSTM1	chr6:108041408-108165854	MB468_CTRL	MB468_W2	OK	11.8931	12.4776	0.0692185	0.12185	0.8041	0.900399	no
ENSG00000081138.13	CDH7	0	0	0	0	0	0	ENSG00000081138.13	CDH7	chr18:65750251-65890341	MB468_CTRL	MB468_W2	NOTEST	0	0	0	0	1	1	no
ENSG00000081148.11	IMPG2	0	0.0214151	0	0.0616245	0	0.0611769	ENSG00000081148.11	IMPG2	chr3:101222545-101320560	MB468_CTRL	MB468_W2	NOTEST	0.00713836	0.0409338	2.51963	0	1	1	no
ENSG00000081154.11	PCNP	47.4216	54.8722	47.1287	48.7537	40.1208	44.2047	ENSG00000081154.11	PCNP	chr3:101574094-101594437	MB468_CTRL	MB468_W2	OK	49.8075	44.3597	-0.167114	-0.61366	0.2161	0.409497	no
ENSG00000081177.18	EXD2	7.1516	6.31456	6.49479	5.16302	4.02628	7.78026	ENSG00000081177.18	EXD2	chr14:69183019-69359308	MB468_CTRL	MB468_W2	OK	6.65365	5.65652	-0.234231	-0.408261	0.3341	0.54265	no
ENSG00000081181.7	ARG2	4.62876	2.8645	4.16644	2.4051	6.52195	4.31124	ENSG00000081181.7	ARG2	chr14:67619797-67695814	MB468_CTRL	MB468_W2	OK	3.88657	4.41276	0.183187	0.193039	0.68805	0.828327	no
ENSG00000081189.14	MEF2C	1.43715	0.662571	2.10064	0.775688	0.533701	2.62949	ENSG00000081189.14	MEF2C	chr5:88507545-89466398	MB468_CTRL	MB468_W2	NOTEST	1.40012	1.31296	-0.0927297	0	1	1	no
ENSG00000081237.18	PTPRC	0	0	0	0	0	0	ENSG00000081237.18	PTPRC	chr1:198638670-198757283	MB468_CTRL	MB468_W2	NOTEST	0	0	0	0	1	1	no
ENSG00000081248.10	CACNA1S	0	0	0	0	0	0	ENSG00000081248.10	CACNA1S	chr1:201031135-201112566	MB468_CTRL	MB468_W2	NOTEST	0	0	0	0	1	1	no
ENSG00000081277.12	PKP1	0.315362	0.134423	0.638317	0.159624	0.251092	0.270126	ENSG00000081277.12	PKP1	chr1:201283451-201332993	MB468_CTRL	MB468_W2	NOTEST	0.362701	0.226947	-0.676422	0	1	1	no
ENSG00000081307.12	UBA5	34.5659	34.0313	42.2775	31.0328	49.4012	61.5751	ENSG00000081307.12	UBA5	chr3:132558137-132874223	MB468_CTRL	MB468_W2	OK	36.9582	47.3364	0.357054	1.00719	0.0838	0.213933	no
ENSG00000081320.10	STK17B	18.8257	17.7107	17.3057	13.0626	17.8052	13.8087	ENSG00000081320.10	STK17B	chr2:196133565-196176503	MB468_CTRL	MB468_W2	OK	17.9474	14.8922	-0.269217	-1.15209	0.0348	0.111836	no
ENSG00000081377.16	CDC14B	6.51629	9.02421	8.53747	4.38227	6.21042	8.28935	ENSG00000081377.16	CDC14B	chr9:96450200-96619830	MB468_CTRL	MB468_W2	OK	8.02599	6.29401	-0.350699	-0.46452	0.2415	0.440744	no
ENSG00000081386.12	ZNF510	3.00325	2.9777	3.63736	4.55521	3.79005	3.86269	ENSG00000081386.12	ZNF510	chr9:96755864-96778129	MB468_CTRL	MB468_W2	OK	3.2061	4.06932	0.343965	0.702736	0.15365	0.325883	no
ENSG00000081479.12	LRP2	0	0	0	0.0260828	0	0	ENSG00000081479.12	LRP2	chr2:169127108-169362685	MB468_CTRL	MB468_W2	NOTEST	0	0.00869427	inf	0	1	1	no
ENSG00000081665.13	ZNF506	10.8326	9.94914	10.2948	12.3226	12.2794	17.1687	ENSG00000081665.13	ZNF506	chr19:19757365-19836073	MB468_CTRL	MB468_W2	OK	10.3588	13.9235	0.426664	0.888785	0.0775	0.202562	no
ENSG00000081692.12	JMJD4	14.7849	18.2077	16.2156	21.0303	18.7882	25.4481	ENSG00000081692.12	JMJD4	chr1:227728538-227781231	MB468_CTRL	MB468_W2	OK	16.4027	21.7555	0.407448	1.05341	0.0629	0.174046	no
ENSG00000081721.11	DUSP12	32.5289	34.4154	35.5306	30.03	35.4252	31.8887	ENSG00000081721.11	DUSP12	chr1:161749757-161757238	MB468_CTRL	MB468_W2	OK	34.1583	32.448	-0.0741079	-0.265756	0.6301	0.789202	no
ENSG00000081760.16	AACS	9.12105	10.4948	11.4155	12.8137	16.8071	14.684	ENSG00000081760.16	AACS	chr12:125065378-125143333	MB468_CTRL	MB468_W2	OK	10.3438	14.7683	0.513737	1.63327	0.00125	0.0077758	yes
ENSG00000081791.8	KIAA0141	20.9476	34.7385	21.2075	31.3635	43.9665	36.3545	ENSG00000081791.8	KIAA0141	chr5:141923807-141942047	MB468_CTRL	MB468_W2	OK	25.6312	37.2282	0.538495	1.32941	0.02255	0.0799867	no
ENSG00000081800.8	SLC13A1	0	0.0707237	0	0	0	0	ENSG00000081800.8	SLC13A1	chr7:123113530-123199986	MB468_CTRL	MB468_W2	NOTEST	0.0235746	0	#NAME?	0	1	1	no
ENSG00000081803.15	CADPS2	10.5098	10.9867	12.2349	7.85133	6.06398	7.54532	ENSG00000081803.15	CADPS2	chr7:122318424-122886759	MB468_CTRL	MB468_W2	OK	11.2438	7.15354	-0.652397	-2.31484	5e-05	0.000470501	yes
ENSG00000081818.3	PCDHB4	0.0704943	0.173794	0	0	0.45514	0.189469	ENSG00000081818.3	PCDHB4	chr5:141100241-141249365	MB468_CTRL	MB468_W2	NOTEST	0.0814295	0.21487	1.39984	0	1	1	no
ENSG00000081842.17	PCDHA6	0	0	0	0.279526	0	0.468886	ENSG00000081842.17	PCDHA6	chr5:140786135-141012347	MB468_CTRL	MB468_W2	NOTEST	0	0.249471	inf	0	1	1	no
ENSG00000081853.14	PCDHGA2	0	0.0511609	0.160619	0	0	0	ENSG00000081853.14	PCDHGA2	chr5:141330570-141512981	MB468_CTRL	MB468_W2	NOTEST	0.0705933	0	#NAME?	0	1	1	no
ENSG00000081870.11	HSPB11	37.3001	37.2643	48.8752	57.0553	96.2838	75.7466	ENSG00000081870.11	HSPB11	chr1:53916573-53945929	MB468_CTRL	MB468_W2	OK	41.1465	76.3619	0.892081	4.26531	5e-05	0.000470501	yes
ENSG00000081913.13	PHLPP1	4.44108	3.634	5.94733	6.25468	2.48895	1.85543	ENSG00000081913.13	PHLPP1	chr18:62715449-62980433	MB468_CTRL	MB468_W2	OK	4.67414	3.53302	-0.403799	-0.422594	0.30635	0.513366	no
ENSG00000081923.11	ATP8B1	9.95715	10.447	8.04671	5.4785	11.5378	8.6363	ENSG00000081923.11	ATP8B1	chr18:57630301-57803101	MB468_CTRL	MB468_W2	OK	9.48362	8.55086	-0.149368	-0.266018	0.6092	0.774243	no
ENSG00000081985.10	IL12RB2	0.0462493	0.0620654	0	0	0	0	ENSG00000081985.10	IL12RB2	chr1:67307363-67396900	MB468_CTRL	MB468_W2	NOTEST	0.0361049	0	#NAME?	0	1	1	no
ENSG00000082014.16	SMARCD3	3.63608	2.66939	2.79852	4.27849	0.744168	5.64062	ENSG00000082014.16	SMARCD3	chr7:151232488-151277896	MB468_CTRL	MB468_W2	OK	3.03466	3.55443	0.22808	0.167223	0.63305	0.79114	no
ENSG00000082068.8	WDR70	7.8223	6.63076	14.7036	7.90218	8.18195	8.18342	ENSG00000082068.8	WDR70	chr5:37379211-37753435	MB468_CTRL	MB468_W2	OK	9.71888	8.08919	-0.264795	-0.371244	0.46085	0.659307	no
ENSG00000082074.15	FYB	0.232399	0.236414	0.252228	0.0989746	0.0797636	0.199409	ENSG00000082074.15	FYB	chr5:39105235-39274528	MB468_CTRL	MB468_W2	NOTEST	0.240347	0.126049	-0.931133	0	1	1	no
ENSG00000082126.17	MPP4	0	0	0	0	0	0	ENSG00000082126.17	MPP4	chr2:201644869-201698694	MB468_CTRL	MB468_W2	NOTEST	0	0	0	0	1	1	no
ENSG00000082146.12	STRADB	10.0728	5.722	6.48804	6.89385	14.3251	21.5205	ENSG00000082146.12	STRADB	chr2:201377206-201480846	MB468_CTRL	MB468_W2	OK	7.4276	14.2465	0.939636	0.858267	0.0706	0.189431	no
ENSG00000082153.17	BZW1	191.93	208.282	245.166	114.748	150.275	120.011	ENSG00000082153.17	BZW1	chr2:200678232-200827338	MB468_CTRL	MB468_W2	OK	215.126	128.345	-0.745155	-2.2062	5e-05	0.000470501	yes
ENSG00000082175.14	PGR	0	0	0.1122	0	0	0	ENSG00000082175.14	PGR	chr11:101029623-101209591	MB468_CTRL	MB468_W2	NOTEST	0.0374	0	#NAME?	0	1	1	no
ENSG00000082196.20	C1QTNF3	0.229265	0.618163	0.836528	1.21366	2.13166	2.21508	ENSG00000082196.20	C1QTNF3	chr5:33986177-34124528	MB468_CTRL	MB468_W2	NOTEST	0.561319	1.85347	1.72334	0	1	1	no
ENSG00000082212.11	ME2	26.7139	24.9635	25.863	13.4022	17.3081	14.0738	ENSG00000082212.11	ME2	chr18:50879048-50954257	MB468_CTRL	MB468_W2	OK	25.8468	14.928	-0.79196	-1.65174	0.0069	0.0311874	yes
ENSG00000082213.17	C5orf22	27.1702	27.1217	20.3756	37.009	20.6477	22.94	ENSG00000082213.17	C5orf22	chr5:31532265-31555058	MB468_CTRL	MB468_W2	OK	24.8891	26.8656	0.110243	0.204611	0.69005	0.829699	no
ENSG00000082258.12	CCNT2	9.41039	10.7038	12.0271	23.4812	25.3299	15.8612	ENSG00000082258.12	CCNT2	chr2:134735463-134959342	MB468_CTRL	MB468_W2	OK	10.7137	21.5574	1.00872	2.39535	5e-05	0.000470501	yes
ENSG00000082269.16	FAM135A	6.75423	9.88578	5.40776	12.8321	11.3434	12.2338	ENSG00000082269.16	FAM135A	chr6:70412827-70561174	MB468_CTRL	MB468_W2	OK	7.34926	12.1365	0.723677	1.31887	0.00605	0.028158	yes
ENSG00000082293.12	COL19A1	0	0	0	0	0	0	ENSG00000082293.12	COL19A1	chr6:69866570-70209976	MB468_CTRL	MB468_W2	NOTEST	0	0	0	0	1	1	no
ENSG00000082397.17	EPB41L3	0	0	0	0	0	0	ENSG00000082397.17	EPB41L3	chr18:5392380-5630700	MB468_CTRL	MB468_W2	NOTEST	0	0	0	0	1	1	no
ENSG00000082438.15	COBLL1	11.1698	15.2297	8.96789	10.3292	15.0124	8.08182	ENSG00000082438.15	COBLL1	chr2:164653623-164849334	MB468_CTRL	MB468_W2	OK	11.7891	11.1411	-0.0815591	-0.113982	0.79755	0.896461	no
ENSG00000082458.11	DLG3	10.5569	14.7963	18.4011	14.3658	8.5499	19.1438	ENSG00000082458.11	DLG3	chrX:70444860-70505490	MB468_CTRL	MB468_W2	OK	14.5848	14.0198	-0.0569957	-0.115814	0.83495	0.917371	no
ENSG00000082482.13	KCNK2	6.90714	8.79303	9.94164	6.96968	4.16027	3.59186	ENSG00000082482.13	KCNK2	chr1:215005774-215237093	MB468_CTRL	MB468_W2	OK	8.54727	4.90727	-0.800543	-1.37468	0.00445	0.0219134	yes
ENSG00000082497.11	SERTAD4	18.0461	14.8917	18.8341	14.3501	13.997	7.4685	ENSG00000082497.11	SERTAD4	chr1:210231455-210246631	MB468_CTRL	MB468_W2	OK	17.2573	11.9385	-0.531581	-1.1778	0.0364	0.11573	no
ENSG00000082512.14	TRAF5	3.12043	4.87565	2.5499	2.90997	11.098	3.6002	ENSG00000082512.14	TRAF5	chr1:211326614-211374946	MB468_CTRL	MB468_W2	OK	3.51533	5.86939	0.739551	0.916533	0.08895	0.223561	no
ENSG00000082515.17	MRPL22	27.7427	31.5826	21.7189	31.4475	22.6766	17.8613	ENSG00000082515.17	MRPL22	chr5:154941069-154969411	MB468_CTRL	MB468_W2	OK	27.0147	23.9951	-0.171004	-0.346109	0.54395	0.725029	no
ENSG00000082516.8	GEMIN5	13.0364	15.1841	13.1537	9.90813	16.5533	10.2796	ENSG00000082516.8	GEMIN5	chr5:154887415-154938209	MB468_CTRL	MB468_W2	OK	13.7914	12.247	-0.171341	-0.450387	0.3876	0.593463	no
ENSG00000082556.10	OPRK1	0.4284	0.041397	0.474413	0.248602	1.67565	0.120494	ENSG00000082556.10	OPRK1	chr8:53177570-53251697	MB468_CTRL	MB468_W2	NOTEST	0.314737	0.681583	1.11474	0	1	1	no
ENSG00000082641.15	NFE2L1	48.8948	47.7882	62.4174	39.4902	39.5873	50.9133	ENSG00000082641.15	NFE2L1	chr17:48048328-48061487	MB468_CTRL	MB468_W2	OK	53.0335	43.3303	-0.291528	-0.860307	0.109	0.257796	no
ENSG00000082684.14	SEMA5B	1.90608	0.427889	0.288328	0	1.0486	0	ENSG00000082684.14	SEMA5B	chr3:122909192-123028605	MB468_CTRL	MB468_W2	NOTEST	0.874097	0.349535	-1.32236	0	1	1	no
ENSG00000082701.14	GSK3B	43.4923	38.3905	41.7311	30.5179	39.3917	39.4696	ENSG00000082701.14	GSK3B	chr3:119821322-120094417	MB468_CTRL	MB468_W2	OK	41.2047	36.4597	-0.176504	-0.550001	0.2923	0.49883	no
ENSG00000082781.11	ITGB5	61.8162	63.4993	65.4264	33.5226	39.9728	53.2126	ENSG00000082781.11	ITGB5	chr3:124761947-124901418	MB468_CTRL	MB468_W2	OK	63.5806	42.236	-0.590113	-2.27809	5e-05	0.000470501	yes
ENSG00000082805.19	ERC1	6.69959	8.65245	11.8081	18.5565	12.1045	8.30107	ENSG00000082805.19	ERC1	chr12:912076-1495933	MB468_CTRL	MB468_W2	OK	9.05336	12.9873	0.520581	0.528881	0.23405	0.431661	no
ENSG00000082898.16	XPO1	106.223	127.181	111.461	125.857	97.4044	88.4144	ENSG00000082898.16	XPO1	chr2:61471187-61538626	MB468_CTRL	MB468_W2	OK	114.955	103.892	-0.145984	-0.335378	0.4759	0.671673	no
ENSG00000082929.8	LINC01587	0	0	0	0	0	0	ENSG00000082929.8	LINC01587	chr4:5524568-5527801	MB468_CTRL	MB468_W2	NOTEST	0	0	0	0	1	1	no
ENSG00000082996.19	RNF13	16.4395	16.17	18.6892	17.3344	19.9271	16.165	ENSG00000082996.19	RNF13	chr3:149761104-150225190	MB468_CTRL	MB468_W2	OK	17.0996	17.8088	0.0586353	0.162438	0.74045	0.86265	no
ENSG00000083067.22	TRPM3	0	0	0	0	0	0	ENSG00000083067.22	TRPM3	chr9:70529062-71446904	MB468_CTRL	MB468_W2	NOTEST	0	0	0	0	1	1	no
ENSG00000083093.9	PALB2	9.287	5.19707	9.00094	12.8424	7.31998	9.46889	ENSG00000083093.9	PALB2	chr16:23603159-23641310	MB468_CTRL	MB468_W2	OK	7.82834	9.87708	0.335378	0.477647	0.36035	0.568409	no
ENSG00000083097.14	DOPEY1	4.33312	4.06426	7.36188	10.7406	9.02193	4.56276	ENSG00000083097.14	DOPEY1	chr6:83067665-83198932	MB468_CTRL	MB468_W2	OK	5.25309	8.10844	0.626259	0.718243	0.1729	0.353713	no
ENSG00000083099.10	LYRM2	32.7405	31.4094	29.0881	24.1531	27.1157	24.3271	ENSG00000083099.10	LYRM2	chr6:89433169-89638753	MB468_CTRL	MB468_W2	OK	31.0793	25.1986	-0.302609	-1.09398	0.052	0.151154	no
ENSG00000083123.14	BCKDHB	28.5021	23.3691	23.1199	12.5128	37.0933	19.9598	ENSG00000083123.14	BCKDHB	chr6:80106646-80346270	MB468_CTRL	MB468_W2	OK	24.997	23.1886	-0.10834	-0.196609	0.70875	0.841609	no
ENSG00000083168.9	KAT6A	17.1584	16.0735	18.2432	22.2487	11.569	6.23508	ENSG00000083168.9	KAT6A	chr8:41929478-42051990	MB468_CTRL	MB468_W2	OK	17.1584	13.3509	-0.361971	-0.409721	0.41245	0.616572	no
ENSG00000083223.17	ZCCHC6	5.69687	6.79502	7.8566	5.94498	5.74422	9.04646	ENSG00000083223.17	ZCCHC6	chr9:86287732-86354454	MB468_CTRL	MB468_W2	OK	6.78283	6.91189	0.0271928	0.0777127	0.87875	0.941395	no
ENSG00000083290.19	ULK2	6.25636	7.58321	11.544	8.79771	9.29706	10.6294	ENSG00000083290.19	ULK2	chr17:19770828-19867936	MB468_CTRL	MB468_W2	OK	8.4612	9.57471	0.178367	0.24644	0.5764	0.749286	no
ENSG00000083307.10	GRHL2	16.2941	17.5809	29.5687	25.2109	27.5121	46.9532	ENSG00000083307.10	GRHL2	chr8:101461176-101669726	MB468_CTRL	MB468_W2	OK	21.1479	33.2254	0.651772	0.714666	0.17515	0.356783	no
ENSG00000083312.17	TNPO1	31.847	29.2955	23.6464	29.1899	28.153	19.2368	ENSG00000083312.17	TNPO1	chr5:72794404-72916733	MB468_CTRL	MB468_W2	OK	28.2629	25.5266	-0.146911	-0.323842	0.5356	0.719092	no
ENSG00000083444.16	PLOD1	16.7792	17.7002	18.9176	16.0259	21.3886	22.3108	ENSG00000083444.16	PLOD1	chr1:11934204-11975538	MB468_CTRL	MB468_W2	OK	17.799	19.9084	0.161582	0.467275	0.3869	0.592862	no
ENSG00000083454.21	P2RX5	3.19845	3.24531	3.46038	1.65997	6.22517	3.68044	ENSG00000083454.21	P2RX5	chr17:3662895-3696404	MB468_CTRL	MB468_W2	OK	3.30138	3.85519	0.223733	0.207652	0.6396	0.795636	no
ENSG00000083457.11	ITGAE	20.1617	22.302	24.5836	49.4408	98.5515	63.4938	ENSG00000083457.11	ITGAE	chr17:3714627-3801243	MB468_CTRL	MB468_W2	OK	22.3491	70.4954	1.65731	4.96966	5e-05	0.000470501	yes
ENSG00000083520.14	DIS3	17.9625	16.2165	20.0098	9.23382	12.4184	24.1915	ENSG00000083520.14	DIS3	chr13:72727748-73016461	MB468_CTRL	MB468_W2	OK	18.0629	15.2812	-0.24127	-0.424612	0.39225	0.597562	no
ENSG00000083535.15	PIBF1	5.88413	2.61933	2.60021	3.51981	3.98482	4.77371	ENSG00000083535.15	PIBF1	chr13:72727748-73016461	MB468_CTRL	MB468_W2	OK	3.70122	4.09278	0.14508	0.126812	0.7577	0.872872	no
ENSG00000083544.13	TDRD3	7.61005	7.0661	6.61101	5.26355	10.5013	6.53015	ENSG00000083544.13	TDRD3	chr13:60396456-60573878	MB468_CTRL	MB468_W2	OK	7.09572	7.43166	0.0667363	0.0938753	0.80305	0.899663	no
ENSG00000083622.8	AC000111.6	0	0	0	0	0	0	ENSG00000083622.8	AC000111.6	chr7:117465783-117874139	MB468_CTRL	MB468_W2	NOTEST	0	0	0	0	1	1	no
ENSG00000083635.7	NUFIP1	4.28442	3.93578	4.13719	3.7375	4.05568	2.89807	ENSG00000083635.7	NUFIP1	chr13:44939248-45083125	MB468_CTRL	MB468_W2	OK	4.11913	3.56375	-0.208944	-0.541772	0.34095	0.549369	no
ENSG00000083642.18	PDS5B	26.2302	25.4568	32.355	14.7375	19.1486	20.1796	ENSG00000083642.18	PDS5B	chr13:32586426-32778019	MB468_CTRL	MB468_W2	OK	28.014	18.0219	-0.636398	-1.65607	0.0064	0.029432	yes
ENSG00000083720.12	OXCT1	26.1685	28.4691	29.1632	12.474	10.2577	15.7913	ENSG00000083720.12	OXCT1	chr5:41730064-41872241	MB468_CTRL	MB468_W2	OK	27.9336	12.841	-1.12124	-2.90742	5e-05	0.000470501	yes
ENSG00000083750.12	RRAGB	8.7747	4.84326	7.25972	3.96041	9.21369	6.01867	ENSG00000083750.12	RRAGB	chrX:55717738-55758774	MB468_CTRL	MB468_W2	OK	6.95923	6.39759	-0.121399	-0.115765	0.79495	0.895103	no
ENSG00000083799.17	CYLD	17.003	23.1683	23.3755	22.0248	15.4445	12.1724	ENSG00000083799.17	CYLD	chr16:50693602-50803338	MB468_CTRL	MB468_W2	OK	21.1823	16.5472	-0.356268	-0.748128	0.1325	0.294559	no
ENSG00000083807.9	SLC27A5	6.11325	12.0555	8.93628	10.7815	30.3439	17.0581	ENSG00000083807.9	SLC27A5	chr19:58467044-58512413	MB468_CTRL	MB468_W2	OK	9.03501	19.3945	1.10205	1.53653	0.0081	0.0354697	yes
ENSG00000083812.11	ZNF324	3.7905	6.99828	3.90462	7.26477	10.5416	8.24688	ENSG00000083812.11	ZNF324	chr19:58467044-58512413	MB468_CTRL	MB468_W2	OK	4.8978	8.68441	0.826294	1.99246	0.00135	0.00827428	yes
ENSG00000083814.13	ZNF671	0	0	0	0	0	0	ENSG00000083814.13	ZNF671	chr19:57681968-57758159	MB468_CTRL	MB468_W2	NOTEST	0	0	0	0	1	1	no
ENSG00000083817.8	ZNF416	2.80474	3.88129	4.17366	3.88085	5.91285	5.89475	ENSG00000083817.8	ZNF416	chr19:57571565-57593777	MB468_CTRL	MB468_W2	OK	3.6199	5.22949	0.530721	1.44481	0.01475	0.057488	no
ENSG00000083828.15	ZNF586	6.42858	8.75473	6.78473	8.49122	10.7038	13.5913	ENSG00000083828.15	ZNF586	chr19:57769654-57916610	MB468_CTRL	MB468_W2	OK	7.32268	10.9288	0.577686	0.807849	0.13415	0.297307	no
ENSG00000083838.15	ZNF446	3.89528	2.89384	2.36738	3.16266	4.45512	3.42501	ENSG00000083838.15	ZNF446	chr19:58467044-58512413	MB468_CTRL	MB468_W2	OK	3.05217	3.68093	0.270237	0.31745	0.45355	0.653029	no
ENSG00000083844.10	ZNF264	8.49728	12.5685	8.4071	9.76012	20.877	15.3568	ENSG00000083844.10	ZNF264	chr19:57191499-57222846	MB468_CTRL	MB468_W2	OK	9.8243	15.3313	0.642055	0.997591	0.07065	0.18951	no
ENSG00000083845.8	RPS5	401.505	455.776	453.097	343.589	407.179	437.067	ENSG00000083845.8	RPS5	chr19:58386399-58394806	MB468_CTRL	MB468_W2	OK	436.793	395.945	-0.141649	-0.948285	0.09765	0.23862	no
ENSG00000083857.13	FAT1	69.2608	78.8125	69.5975	44.1932	53.504	46.62	ENSG00000083857.13	FAT1	chr4:186587782-186726722	MB468_CTRL	MB468_W2	OK	72.5569	48.1057	-0.592905	-1.12947	0.0091	0.0389323	yes
ENSG00000083896.12	YTHDC1	51.0558	55.2324	64.4953	43.2181	40.4836	40.9584	ENSG00000083896.12	YTHDC1	chr4:68310386-68350089	MB468_CTRL	MB468_W2	OK	56.9278	41.5534	-0.454169	-0.990445	0.06755	0.183477	no
ENSG00000083937.8	CHMP2B	21.5976	20.8365	24.2099	13.4543	17.6099	15.036	ENSG00000083937.8	CHMP2B	chr3:87227270-87255548	MB468_CTRL	MB468_W2	OK	22.2147	15.3667	-0.531701	-2.36195	5e-05	0.000470501	yes
ENSG00000084070.11	SMAP2	20.9763	23.5726	22.3083	18.9417	17.3379	10.6068	ENSG00000084070.11	SMAP2	chr1:40344849-40423326	MB468_CTRL	MB468_W2	OK	22.2857	15.6288	-0.511916	-1.62354	0.00545	0.0258146	yes
ENSG00000084072.16	PPIE	34.6986	37.1148	35.6167	33.7337	35.6432	35.705	ENSG00000084072.16	PPIE	chr1:39692181-39788861	MB468_CTRL	MB468_W2	OK	35.81	35.0273	-0.0318844	-0.145309	0.78955	0.892092	no
ENSG00000084073.8	ZMPSTE24	107.882	109.766	109.227	70.6834	59.0996	69.9663	ENSG00000084073.8	ZMPSTE24	chr1:40258106-40294184	MB468_CTRL	MB468_W2	OK	108.959	66.5831	-0.710551	-4.24349	5e-05	0.000470501	yes
ENSG00000084090.13	STARD7	120.829	132.184	141.041	76.1141	84.0331	103.498	ENSG00000084090.13	STARD7	chr2:96184858-96242621	MB468_CTRL	MB468_W2	OK	131.351	87.8818	-0.579794	-3.17074	5e-05	0.000470501	yes
ENSG00000084092.6	NOA1	10.3832	12.748	13.2592	10.8786	10.0688	11.1915	ENSG00000084092.6	NOA1	chr4:56963369-57205510	MB468_CTRL	MB468_W2	OK	12.1302	10.7129	-0.179244	-0.476825	0.40675	0.610917	no
ENSG00000084093.15	REST	26.1323	21.4756	18.5451	13.5045	13.8539	17.2126	ENSG00000084093.15	REST	chr4:56907875-56935844	MB468_CTRL	MB468_W2	OK	22.051	14.857	-0.569702	-1.75828	0.0024	0.0132777	yes
ENSG00000084110.10	HAL	0	0.262692	0.0442856	0.990361	0.977527	0	ENSG00000084110.10	HAL	chr12:95972661-95996365	MB468_CTRL	MB468_W2	NOTEST	0.102326	0.655963	2.68044	0	1	1	no
ENSG00000084112.14	SSH1	5.68305	6.34009	6.56035	5.79879	5.8755	9.30935	ENSG00000084112.14	SSH1	chr12:108778143-108857590	MB468_CTRL	MB468_W2	OK	6.1945	6.99455	0.175244	0.337431	0.472	0.66835	no
ENSG00000084207.15	GSTP1	41.8584	42.0457	52.5083	20.14	18.9716	25.0266	ENSG00000084207.15	GSTP1	chr11:67583594-67586660	MB468_CTRL	MB468_W2	OK	45.4708	21.3794	-1.08872	-3.57629	5e-05	0.000470501	yes
ENSG00000084234.16	APLP2	269.24	262.733	296.483	134.156	155.258	195.319	ENSG00000084234.16	APLP2	chr11:130069836-130144811	MB468_CTRL	MB468_W2	OK	276.152	161.578	-0.773235	-2.29951	5e-05	0.000470501	yes
ENSG00000084444.13	FAM234B	0.391059	0.854453	0.925889	0.933465	1.35277	1.22425	ENSG00000084444.13	FAM234B	chr12:13044283-13142521	MB468_CTRL	MB468_W2	NOTEST	0.7238	1.17016	0.693045	0	1	1	no
ENSG00000084453.16	SLCO1A2	0	0.0181611	0	0	0	0	ENSG00000084453.16	SLCO1A2	chr12:21264599-21419594	MB468_CTRL	MB468_W2	NOTEST	0.00605371	0	#NAME?	0	1	1	no
ENSG00000084463.7	WBP11	33.6158	32.4996	39.0328	27.4051	22.0711	37.1294	ENSG00000084463.7	WBP11	chr12:14784578-14803540	MB468_CTRL	MB468_W2	OK	35.0494	28.8685	-0.279892	-0.941522	0.10015	0.24298	no
ENSG00000084623.11	EIF3I	95.8928	105.571	109.863	69.4593	88.7849	85.8739	ENSG00000084623.11	EIF3I	chr1:32209093-32231604	MB468_CTRL	MB468_W2	OK	103.775	81.3727	-0.350848	-1.89362	0.0013	0.00802013	yes
ENSG00000084628.9	NKAIN1	0	0.098747	0	0	0	0	ENSG00000084628.9	NKAIN1	chr1:31179744-31239554	MB468_CTRL	MB468_W2	NOTEST	0.0329157	0	#NAME?	0	1	1	no
ENSG00000084636.17	COL16A1	0.90344	1.2541	1.04479	2.81404	4.0613	3.82142	ENSG00000084636.17	COL16A1	chr1:31617685-31704319	MB468_CTRL	MB468_W2	OK	1.06744	3.56559	1.73998	0.727928	0.0006	0.00420723	yes
ENSG00000084652.15	TXLNA	34.6216	39.9021	39.265	22.2046	24.7238	25.9729	ENSG00000084652.15	TXLNA	chr1:32179685-32198285	MB468_CTRL	MB468_W2	OK	37.9296	24.3005	-0.642341	-4.36263	5e-05	0.000470501	yes
ENSG00000084674.14	APOB	0	0	0	0	0	0	ENSG00000084674.14	APOB	chr2:21001428-21044073	MB468_CTRL	MB468_W2	NOTEST	0	0	0	0	1	1	no
ENSG00000084676.15	NCOA1	13.9326	13.2981	16.4344	23.0377	7.86195	18.2114	ENSG00000084676.15	NCOA1	chr2:24491913-24770702	MB468_CTRL	MB468_W2	OK	14.555	16.3704	0.16957	0.248418	0.56875	0.744347	no
ENSG00000084693.15	AGBL5	20.9242	19.1479	20.1653	15.148	16.8634	22.3602	ENSG00000084693.15	AGBL5	chr2:27042363-27071773	MB468_CTRL	MB468_W2	OK	20.0791	18.1238	-0.147808	-0.418947	0.4273	0.629857	no
ENSG00000084710.13	EFR3B	0.380468	0.311538	0.394839	0.49301	0.336491	0.384966	ENSG00000084710.13	EFR3B	chr2:25042129-25159137	MB468_CTRL	MB468_W2	NOTEST	0.362282	0.404822	0.160178	0	1	1	no
ENSG00000084731.14	KIF3C	7.63501	8.85882	8.37021	5.01936	6.31161	6.3992	ENSG00000084731.14	KIF3C	chr2:25926595-25982749	MB468_CTRL	MB468_W2	OK	8.28801	5.91006	-0.487854	-1.39514	0.00245	0.0135034	yes
ENSG00000084733.10	RAB10	99.9524	99.7531	106.025	68.6797	53.2838	66.2008	ENSG00000084733.10	RAB10	chr2:26034106-26137454	MB468_CTRL	MB468_W2	OK	101.91	62.7214	-0.700269	-4.23699	5e-05	0.000470501	yes
ENSG00000084734.8	GCKR	0	0.346756	0	0	0	0	ENSG00000084734.8	GCKR	chr2:27496841-27523684	MB468_CTRL	MB468_W2	NOTEST	0.115585	0	#NAME?	0	1	1	no
ENSG00000084754.10	HADHA	81.4003	79.6675	75.3309	35.2598	47.4499	42.268	ENSG00000084754.10	HADHA	chr2:26190634-26290468	MB468_CTRL	MB468_W2	OK	78.7995	41.6593	-0.91955	-3.13419	5e-05	0.000470501	yes
ENSG00000084764.10	MAPRE3	4.34064	4.81855	6.17905	14.8804	10.9875	9.97064	ENSG00000084764.10	MAPRE3	chr2:26847746-27027196	MB468_CTRL	MB468_W2	OK	5.11275	11.9462	1.22438	2.05101	5e-05	0.000470501	yes
ENSG00000084774.13	CAD	27.4091	29.3363	31.6065	27.3087	36.8633	40.2389	ENSG00000084774.13	CAD	chr2:27217389-27243943	MB468_CTRL	MB468_W2	OK	29.4506	34.8036	0.240939	0.525066	0.32985	0.538108	no
ENSG00000085063.14	CD59	481.112	516.715	554.108	449.009	584.155	478.807	ENSG00000085063.14	CD59	chr11:33698260-33736445	MB468_CTRL	MB468_W2	OK	517.312	503.99	-0.0376379	-0.203498	0.7179	0.847914	no
ENSG00000085117.11	CD82	153.987	144.731	140.085	96.8944	100.269	119.441	ENSG00000085117.11	CD82	chr11:44564426-44620363	MB468_CTRL	MB468_W2	OK	146.268	105.535	-0.470892	-2.01634	0.00015	0.00126619	yes
ENSG00000085185.15	BCORL1	2.20884	3.56783	3.06475	2.82029	2.62212	4.31835	ENSG00000085185.15	BCORL1	chrX:129981106-130058083	MB468_CTRL	MB468_W2	OK	2.94714	3.25359	0.142716	0.211271	0.6297	0.788971	no
ENSG00000085224.21	ATRX	44.1811	58.0634	43.1844	42.7346	51.1581	43.2297	ENSG00000085224.21	ATRX	chrX:77504877-77786269	MB468_CTRL	MB468_W2	OK	48.4763	45.7075	-0.0848496	-0.138829	0.7734	0.882359	no
ENSG00000085231.13	AK6	19.5178	13.6999	18.63	15.6975	22.9611	31.6417	ENSG00000085231.13	AK6	chr5:69350983-69414801	MB468_CTRL	MB468_W2	OK	17.2826	23.4334	0.43925	0.920958	0.09975	0.242314	no
ENSG00000085265.10	FCN1	0.0376813	0	0	0	0	0	ENSG00000085265.10	FCN1	chr9:134905889-134917963	MB468_CTRL	MB468_W2	NOTEST	0.0125604	0	#NAME?	0	1	1	no
ENSG00000085274.15	MYNN	6.40664	9.31209	7.48787	6.93287	5.52965	10.4043	ENSG00000085274.15	MYNN	chr3:169772830-169789716	MB468_CTRL	MB468_W2	OK	7.73553	7.62227	-0.0212793	-0.0552565	0.9215	0.961698	no
ENSG00000085276.17	MECOM	0	0.0767199	0	0	0	0.101784	ENSG00000085276.17	MECOM	chr3:169083498-169663618	MB468_CTRL	MB468_W2	NOTEST	0.0255733	0.0339281	0.407845	0	1	1	no
ENSG00000085365.17	SCAMP1	17.1718	14.8582	18.1288	12.1826	12.4425	16.721	ENSG00000085365.17	SCAMP1	chr5:78360582-78479071	MB468_CTRL	MB468_W2	OK	16.7196	13.782	-0.278752	-0.603078	0.2132	0.405827	no
ENSG00000085377.13	PREP	37.1786	41.6709	45.3688	29.1771	35.1471	30.3314	ENSG00000085377.13	PREP	chr6:105277564-105403084	MB468_CTRL	MB468_W2	OK	41.4061	31.5519	-0.392119	-1.86451	0.00145	0.00877566	yes
ENSG00000085382.11	HACE1	9.12506	11.0631	8.81402	17.8917	19.7515	18.1088	ENSG00000085382.11	HACE1	chr6:104728092-104859919	MB468_CTRL	MB468_W2	OK	9.6674	18.584	0.942863	1.98309	0.00015	0.00126619	yes
ENSG00000085415.15	SEH1L	116.757	106.058	109.785	78.4443	90.3595	87.1258	ENSG00000085415.15	SEH1L	chr18:12947132-12991173	MB468_CTRL	MB468_W2	OK	110.866	85.3099	-0.378038	-2.02788	0.0003	0.00233849	yes
ENSG00000085433.15	WDR47	4.72599	4.16341	4.62648	5.0441	5.79319	5.43623	ENSG00000085433.15	WDR47	chr1:108970213-109042113	MB468_CTRL	MB468_W2	OK	4.50529	5.42451	0.267872	0.378983	0.3662	0.573686	no
ENSG00000085449.14	WDFY1	23.4306	25.1871	17.7511	16.0787	11.9824	12.0468	ENSG00000085449.14	WDFY1	chr2:223855715-223945387	MB468_CTRL	MB468_W2	OK	22.1229	13.3693	-0.726619	-1.57982	0.001	0.00645736	yes
ENSG00000085465.12	OVGP1	0.557357	1.343	0.880279	1.26399	0.275209	2.82554	ENSG00000085465.12	OVGP1	chr1:111414313-111427777	MB468_CTRL	MB468_W2	NOTEST	0.926878	1.45491	0.650482	0	1	1	no
ENSG00000085491.15	SLC25A24	53.2758	53.6134	52.4716	29.0556	27.5555	30.9787	ENSG00000085491.15	SLC25A24	chr1:108134035-108202743	MB468_CTRL	MB468_W2	OK	53.1203	29.1966	-0.863463	-5.1175	5e-05	0.000470501	yes
ENSG00000085511.19	MAP3K4	3.90109	4.21977	8.7088	5.74881	10.9889	18.0829	ENSG00000085511.19	MAP3K4	chr6:160990317-161117385	MB468_CTRL	MB468_W2	OK	5.60989	11.6069	1.04894	1.00543	0.01455	0.0568293	no
ENSG00000085514.15	PILRA	0.492947	0.405032	0.370581	2.86527	3.8849	5.51175	ENSG00000085514.15	PILRA	chr7:100307701-100400099	MB468_CTRL	MB468_W2	OK	0.422853	4.08731	3.27292	0.996753	0.00115	0.0072622	yes
ENSG00000085552.16	IGSF9	8.72518	11.4583	10.3241	13.2595	17.1903	16.7058	ENSG00000085552.16	IGSF9	chr1:159927038-159945604	MB468_CTRL	MB468_W2	OK	10.1692	15.7185	0.628259	2.94355	5e-05	0.000470501	yes
ENSG00000085563.14	ABCB1	1.0643	1.49419	1.20368	1.05035	0.597559	0.926642	ENSG00000085563.14	ABCB1	chr7:87503632-87832296	MB468_CTRL	MB468_W2	NOTEST	1.25406	0.858185	-0.547241	0	1	1	no
ENSG00000085644.13	ZNF213	4.8132	7.02923	6.27777	4.37809	13.2704	6.51607	ENSG00000085644.13	ZNF213	chr16:3110459-3142805	MB468_CTRL	MB468_W2	OK	6.04007	8.05485	0.415293	0.761569	0.1627	0.339324	no
ENSG00000085662.13	AKR1B1	72.9603	84.5708	84.6981	113.701	129.107	125.53	ENSG00000085662.13	AKR1B1	chr7:134442349-134459284	MB468_CTRL	MB468_W2	OK	80.743	122.779	0.604659	3.58318	5e-05	0.000470501	yes
ENSG00000085719.12	CPNE3	36.5432	33.9554	32.3342	25.4261	25.2962	22.4167	ENSG00000085719.12	CPNE3	chr8:86514426-86765023	MB468_CTRL	MB468_W2	OK	34.2776	24.3797	-0.491588	-1.22734	0.0135	0.0535152	no
ENSG00000085721.12	RRN3	19.1848	21.649	21.7214	13.0028	12.7895	12.1168	ENSG00000085721.12	RRN3	chr16:14974590-15154564	MB468_CTRL	MB468_W2	OK	20.8517	12.6364	-0.722582	-2.36015	5e-05	0.000470501	yes
ENSG00000085733.15	CTTN	91.5596	110.266	101.266	156.122	193.349	186.136	ENSG00000085733.15	CTTN	chr11:70270699-70436584	MB468_CTRL	MB468_W2	OK	101.03	178.536	0.821424	2.56456	5e-05	0.000470501	yes
ENSG00000085741.12	WNT11	0.308323	0.103758	0.260532	0	0	1.80523	ENSG00000085741.12	WNT11	chr11:76186324-76210736	MB468_CTRL	MB468_W2	NOTEST	0.224204	0.601743	1.42433	0	1	1	no
ENSG00000085760.14	MTIF2	29.4497	28.6993	31.1731	23.4944	21.4223	26.1866	ENSG00000085760.14	MTIF2	chr2:55236594-55269347	MB468_CTRL	MB468_W2	OK	29.774	23.7011	-0.329101	-1.1373	0.0368	0.116779	no
ENSG00000085788.13	DDHD2	30.056	29.8506	32.7995	35.7239	44.3148	35.3565	ENSG00000085788.13	DDHD2	chr8:38225217-38382272	MB468_CTRL	MB468_W2	OK	30.902	38.465	0.315845	0.523682	0.3333	0.541855	no
ENSG00000085831.15	TTC39A	15.6972	25.1506	23.3772	14.7651	14.4566	17.2862	ENSG00000085831.15	TTC39A	chr1:51287257-51345116	MB468_CTRL	MB468_W2	OK	21.4083	15.5027	-0.465658	-1.29607	0.00965	0.0408326	yes
ENSG00000085832.16	EPS15	33.2684	33.805	36.9362	24.5122	25.8145	24.6459	ENSG00000085832.16	EPS15	chr1:51354262-51561629	MB468_CTRL	MB468_W2	OK	34.6699	24.9908	-0.472284	-1.82091	0.0005	0.00361388	yes
ENSG00000085840.12	ORC1	11.9845	15.66	14.8333	6.88129	7.24508	7.92362	ENSG00000085840.12	ORC1	chr1:52372828-52404459	MB468_CTRL	MB468_W2	OK	14.1593	7.35	-0.945932	-4.8473	5e-05	0.000470501	yes
ENSG00000085871.8	MGST2	14.5183	14.1003	16.798	5.95702	19.5572	9.94847	ENSG00000085871.8	MGST2	chr4:139665767-140154184	MB468_CTRL	MB468_W2	OK	15.1389	11.8209	-0.356919	-0.477829	0.3348	0.543474	no
ENSG00000085872.14	CHERP	43.957	50.7842	52.4197	29.2619	49.6014	44.1742	ENSG00000085872.14	CHERP	chr19:16479056-16660442	MB468_CTRL	MB468_W2	OK	49.0536	41.0125	-0.258296	-0.694781	0.2002	0.389455	no
ENSG00000085978.21	ATG16L1	12.9259	14.1773	13.3418	18.6754	17.9368	24.3795	ENSG00000085978.21	ATG16L1	chr2:233210050-233295674	MB468_CTRL	MB468_W2	OK	13.4817	20.3306	0.59265	1.00571	0.06975	0.187755	no
ENSG00000085982.13	USP40	8.1333	10.1033	6.2383	10.6928	15.5207	7.86141	ENSG00000085982.13	USP40	chr2:233475519-233566782	MB468_CTRL	MB468_W2	OK	8.15831	11.3583	0.477402	0.570773	0.15685	0.33068	no
ENSG00000085998.13	POMGNT1	27.698	27.5013	24.5611	40.5198	27.1045	40.5573	ENSG00000085998.13	POMGNT1	chr1:46188681-46221261	MB468_CTRL	MB468_W2	OK	26.5868	36.0605	0.439712	1.3965	0.0151	0.0585285	no
ENSG00000085999.11	RAD54L	10.2945	13.5698	16.5703	12.8812	12.7855	13.6056	ENSG00000085999.11	RAD54L	chr1:46247687-46303608	MB468_CTRL	MB468_W2	OK	13.4782	13.0908	-0.0420784	-0.0834701	0.8609	0.932218	no
ENSG00000086015.20	MAST2	33.6969	32.8352	37.3729	43.2249	41.1691	48.047	ENSG00000086015.20	MAST2	chr1:45786986-46036124	MB468_CTRL	MB468_W2	OK	34.635	44.147	0.350083	1.08366	0.04855	0.143528	no
ENSG00000086061.15	DNAJA1	51.3051	52.8413	53.3332	28.1399	35.7921	35.4311	ENSG00000086061.15	DNAJA1	chr9:33025210-33039907	MB468_CTRL	MB468_W2	OK	52.4932	33.1211	-0.664382	-4.09785	5e-05	0.000470501	yes
ENSG00000086062.12	B4GALT1	33.8494	40.0749	36.6052	22.6232	25.6166	30.1974	ENSG00000086062.12	B4GALT1	chr9:33104081-33179983	MB468_CTRL	MB468_W2	OK	36.8432	26.1457	-0.494821	-3.12344	5e-05	0.000470501	yes
ENSG00000086065.13	CHMP5	9.91918	8.72423	8.9204	4.51656	6.80874	6.91219	ENSG00000086065.13	CHMP5	chr9:33264878-33282069	MB468_CTRL	MB468_W2	OK	9.18794	6.07916	-0.595868	-1.42851	0.0064	0.029432	yes
ENSG00000086102.18	NFX1	6.89473	7.16829	8.33682	9.64028	11.6679	13.7975	ENSG00000086102.18	NFX1	chr9:33290510-33371157	MB468_CTRL	MB468_W2	OK	7.46662	11.7019	0.648216	1.57132	0.00125	0.0077758	yes
ENSG00000086159.12	AQP6	0	0	0	0	0	0	ENSG00000086159.12	AQP6	chr12:49967193-50033136	MB468_CTRL	MB468_W2	NOTEST	0	0	0	0	1	1	no
ENSG00000086189.9	DIMT1	13.5733	12.8514	13.2118	14.8589	23.3219	18.663	ENSG00000086189.9	DIMT1	chr5:62306161-62628582	MB468_CTRL	MB468_W2	OK	13.2122	18.9479	0.520175	1.35667	0.0144	0.0563937	no
ENSG00000086200.16	IPO11	14.8698	12.3488	11.9542	9.05419	10.678	10.0838	ENSG00000086200.16	IPO11	chr5:62306161-62628582	MB468_CTRL	MB468_W2	OK	13.0576	9.93867	-0.393767	-0.692403	0.12085	0.276664	no
ENSG00000086205.16	FOLH1	0	0	0	0	0	0	ENSG00000086205.16	FOLH1	chr11:49146634-49208670	MB468_CTRL	MB468_W2	NOTEST	0	0	0	0	1	1	no
ENSG00000086232.12	EIF2AK1	99.7395	104.08	111.97	123.616	91.3725	103.339	ENSG00000086232.12	EIF2AK1	chr7:6009244-6059230	MB468_CTRL	MB468_W2	OK	105.263	106.109	0.0115495	0.0329736	0.95035	0.975665	no
ENSG00000086289.11	EPDR1	0	0	0.519093	0	0	0	ENSG00000086289.11	EPDR1	chr7:37683795-38025695	MB468_CTRL	MB468_W2	NOTEST	0.173031	0	#NAME?	0	1	1	no
ENSG00000086300.15	SNX10	24.0697	20.7404	21.823	28.493	18.8816	16.1765	ENSG00000086300.15	SNX10	chr7:26291894-26376701	MB468_CTRL	MB468_W2	OK	22.211	21.1837	-0.0683225	-0.173718	0.7046	0.839291	no
ENSG00000086475.14	SEPHS1	53.3456	56.7107	47.1569	32.3401	43.7575	35.8833	ENSG00000086475.14	SEPHS1	chr10:13317423-13348298	MB468_CTRL	MB468_W2	OK	52.4044	37.3269	-0.489472	-1.73053	0.00155	0.00925706	yes
ENSG00000086504.15	MRPL28	22.8629	24.5621	26.9055	15.4051	18.9808	18.5875	ENSG00000086504.15	MRPL28	chr16:367383-370527	MB468_CTRL	MB468_W2	OK	24.7768	17.6578	-0.488686	-1.75118	0.0022	0.0123502	yes
ENSG00000086506.2	HBQ1	0	0	0	0	0	0	ENSG00000086506.2	HBQ1	chr16:180452-181181	MB468_CTRL	MB468_W2	NOTEST	0	0	0	0	1	1	no
ENSG00000086544.2	ITPKC	5.20083	4.72177	5.7783	4.9692	5.53442	6.09357	ENSG00000086544.2	ITPKC	chr19:40691528-40765389	MB468_CTRL	MB468_W2	OK	5.23363	5.5324	0.0800926	0.158641	0.77185	0.881251	no
ENSG00000086548.8	CEACAM6	2.51785	2.95477	3.06354	0.540095	0.219535	0.532268	ENSG00000086548.8	CEACAM6	chr19:41708584-41786893	MB468_CTRL	MB468_W2	OK	2.84539	0.430633	-2.7241	-1.57449	0.00045	0.00330662	yes
ENSG00000086570.12	FAT2	1.28336	1.57891	1.63963	1.81192	1.88532	1.74401	ENSG00000086570.12	FAT2	chr5:151504092-151568944	MB468_CTRL	MB468_W2	NOTEST	1.50064	1.81375	0.2734	0	1	1	no
ENSG00000086589.11	RBM22	30.2182	33.1363	35.6361	36.2871	38.8065	33.8706	ENSG00000086589.11	RBM22	chr5:150690793-150701107	MB468_CTRL	MB468_W2	OK	32.9969	36.3214	0.138491	0.520377	0.3267	0.534611	no
ENSG00000086598.10	TMED2	90.72	83.902	97.7774	114.494	133.892	111.038	ENSG00000086598.10	TMED2	chr12:123575890-123598577	MB468_CTRL	MB468_W2	OK	90.7998	119.808	0.399964	2.49538	5e-05	0.000470501	yes
ENSG00000086619.13	ERO1B	2.09013	1.83464	3.46944	2.46902	2.34747	1.82201	ENSG00000086619.13	ERO1B	chr1:236142504-236281985	MB468_CTRL	MB468_W2	NOTEST	2.46474	2.21283	-0.155538	0	1	1	no
ENSG00000086666.18	ZFAND6	54.5454	49.621	52.4231	37.5076	56.7607	50.1856	ENSG00000086666.18	ZFAND6	chr15:80059567-80138393	MB468_CTRL	MB468_W2	OK	52.1965	48.1513	-0.116378	-0.52755	0.3133	0.521188	no
ENSG00000086696.10	HSD17B2	4.9508	5.5777	6.70983	1.67444	3.51876	2.20619	ENSG00000086696.10	HSD17B2	chr16:82035003-82139631	MB468_CTRL	MB468_W2	OK	5.74611	2.46646	-1.22014	-1.30762	0.0058	0.0271843	yes
ENSG00000086712.12	TXLNG	11.3371	12.9967	12.494	12.3153	10.4046	8.0276	ENSG00000086712.12	TXLNG	chrX:16786426-16870414	MB468_CTRL	MB468_W2	OK	12.2759	10.2492	-0.260326	-0.526418	0.34665	0.555088	no
ENSG00000086717.18	PPEF1	0.344779	0	0	0	1.29975	0.127171	ENSG00000086717.18	PPEF1	chrX:18675908-18827921	MB468_CTRL	MB468_W2	NOTEST	0.114926	0.47564	2.04916	0	1	1	no
ENSG00000086730.16	LAT2	0.256811	0.391226	0.680317	0.111282	1.89184	0.534473	ENSG00000086730.16	LAT2	chr7:74199651-74229834	MB468_CTRL	MB468_W2	NOTEST	0.442785	0.845865	0.933822	0	1	1	no
ENSG00000086758.15	HUWE1	82.0175	86.8262	84.9845	72.397	89.4275	83.3397	ENSG00000086758.15	HUWE1	chrX:53532095-53686729	MB468_CTRL	MB468_W2	OK	84.6094	81.7214	-0.0501038	-0.108688	0.83	0.914785	no
ENSG00000086827.8	ZW10	20.0291	19.2982	23.2092	13.3918	14.8561	13.9258	ENSG00000086827.8	ZW10	chr11:113733186-113773811	MB468_CTRL	MB468_W2	OK	20.8455	14.0579	-0.568357	-3.24424	5e-05	0.000470501	yes
ENSG00000086848.14	ALG9	27.7452	29.058	27.4148	23.7047	29.0062	30.3887	ENSG00000086848.14	ALG9	chr11:111782194-111885975	MB468_CTRL	MB468_W2	OK	28.0727	27.6999	-0.0192868	-0.0557565	0.91365	0.957805	no
ENSG00000086967.9	MYBPC2	0	0	0	0	0	0	ENSG00000086967.9	MYBPC2	chr19:50432902-50466321	MB468_CTRL	MB468_W2	NOTEST	0	0	0	0	1	1	no
ENSG00000086991.12	NOX4	0	0	0	0	0	0	ENSG00000086991.12	NOX4	chr11:89324355-89498187	MB468_CTRL	MB468_W2	NOTEST	0	0	0	0	1	1	no
ENSG00000087008.15	ACOX3	3.57364	5.61415	3.88445	3.3212	2.6006	5.43255	ENSG00000087008.15	ACOX3	chr4:8366281-8512610	MB468_CTRL	MB468_W2	OK	4.35741	3.78479	-0.203261	-0.253869	0.54615	0.726851	no
ENSG00000087053.18	MTMR2	30.8406	25.9297	26.6551	22.6545	20.9428	23.5049	ENSG00000087053.18	MTMR2	chr11:95832881-95925315	MB468_CTRL	MB468_W2	OK	27.8085	22.3674	-0.314129	-0.760177	0.1289	0.289187	no
ENSG00000087074.7	PPP1R15A	12.779	14.5702	17.1469	9.54442	16.6922	13.9129	ENSG00000087074.7	PPP1R15A	chr19:48872391-48876057	MB468_CTRL	MB468_W2	OK	14.832	13.3832	-0.148295	-0.892098	0.1303	0.291453	no
ENSG00000087076.8	HSD17B14	0	0	0	1.40717	0	0	ENSG00000087076.8	HSD17B14	chr19:48813016-48836678	MB468_CTRL	MB468_W2	NOTEST	0	0.469056	inf	0	1	1	no
ENSG00000087077.12	TRIP6	26.3212	23.8575	27.9791	20.3427	28.1136	27.0045	ENSG00000087077.12	TRIP6	chr7:100867137-100873454	MB468_CTRL	MB468_W2	OK	26.0526	25.1536	-0.050662	-0.124774	0.7895	0.892063	no
ENSG00000087085.13	ACHE	0	0	0	0	0	0	ENSG00000087085.13	ACHE	chr7:100889993-100896974	MB468_CTRL	MB468_W2	NOTEST	0	0	0	0	1	1	no
ENSG00000087086.14	FTL	48.359	45.3451	47.8252	48.6134	53.5221	50.4723	ENSG00000087086.14	FTL	chr19:48965300-48966878	MB468_CTRL	MB468_W2	OK	47.1764	50.8693	0.108728	0.530072	0.3543	0.562546	no
ENSG00000087087.18	SRRT	69.4558	68.9659	73.876	94.5613	106.071	99.612	ENSG00000087087.18	SRRT	chr7:100875110-100888664	MB468_CTRL	MB468_W2	OK	70.7659	100.082	0.500051	1.5597	0.00645	0.0296284	yes
ENSG00000087088.19	BAX	19.0863	23.8315	21.6095	20.4597	8.39183	25.9038	ENSG00000087088.19	BAX	chr19:48954814-48961798	MB468_CTRL	MB468_W2	OK	21.5091	18.2518	-0.236911	-0.509455	0.2949	0.501726	no
ENSG00000087095.12	NLK	4.14664	4.28462	4.69799	4.30571	6.15001	5.78555	ENSG00000087095.12	NLK	chr17:28041736-28196381	MB468_CTRL	MB468_W2	OK	4.37642	5.41376	0.30688	0.525901	0.2372	0.435695	no
ENSG00000087111.20	PIGS	16.9208	15.604	14.6749	8.48669	10.9728	9.50309	ENSG00000087111.20	PIGS	chr17:28455751-28645454	MB468_CTRL	MB468_W2	OK	15.7333	9.65418	-0.704591	-0.744571	0.0738	0.195654	no
ENSG00000087116.14	ADAMTS2	0	0	0	0	0	0	ENSG00000087116.14	ADAMTS2	chr5:179110850-179345430	MB468_CTRL	MB468_W2	NOTEST	0	0	0	0	1	1	no
ENSG00000087128.9	TMPRSS11E	7.30591	8.13561	6.95779	1.68089	2.96907	2.37226	ENSG00000087128.9	TMPRSS11E	chr4:68447448-68497604	MB468_CTRL	MB468_W2	OK	7.46644	2.34074	-1.67346	-3.26892	5e-05	0.000470501	yes
ENSG00000087152.15	ATXN7L3	30.43	24.6415	18.6299	19.3642	18.6276	36.7019	ENSG00000087152.15	ATXN7L3	chr17:44191804-44223710	MB468_CTRL	MB468_W2	OK	24.5671	24.8979	0.0192954	0.0308837	0.95675	0.979106	no
ENSG00000087157.18	PGS1	9.75513	14.9398	14.8847	28.6991	38.293	28.8032	ENSG00000087157.18	PGS1	chr17:78378639-78577394	MB468_CTRL	MB468_W2	OK	13.1932	31.9318	1.2752	3.38874	5e-05	0.000470501	yes
ENSG00000087191.12	PSMC5	30.8197	40.4304	34.172	26.8278	41.5215	26.8298	ENSG00000087191.12	PSMC5	chr17:63819432-63832026	MB468_CTRL	MB468_W2	OK	35.1407	31.7264	-0.14746	-0.27179	0.57395	0.747802	no
ENSG00000087206.16	UIMC1	16.0495	18.8688	24.2112	13.0624	27.1743	28.8707	ENSG00000087206.16	UIMC1	chr5:176905004-177022633	MB468_CTRL	MB468_W2	OK	19.7099	23.0358	0.22496	0.549699	0.2892	0.495339	no
ENSG00000087237.10	CETP	0	0.121596	0	0	0	0	ENSG00000087237.10	CETP	chr16:56961849-56983845	MB468_CTRL	MB468_W2	NOTEST	0.0405322	0	#NAME?	0	1	1	no
ENSG00000087245.12	MMP2	0.560689	1.22018	0.838122	0.163472	0.925431	0	ENSG00000087245.12	MMP2	chr16:55389699-55506691	MB468_CTRL	MB468_W2	NOTEST	0.872996	0.362968	-1.26613	0	1	1	no
ENSG00000087250.8	MT3	0	0	0	0	0	0	ENSG00000087250.8	MT3	chr16:56589073-56591088	MB468_CTRL	MB468_W2	NOTEST	0	0	0	0	1	1	no
ENSG00000087253.12	LPCAT2	24.7621	18.5859	22.8175	23.4753	23.0722	18.2624	ENSG00000087253.12	LPCAT2	chr16:55508997-55586670	MB468_CTRL	MB468_W2	OK	22.0552	21.6033	-0.0298674	-0.0662826	0.90025	0.951743	no
ENSG00000087258.13	GNAO1	19.6091	15.841	20.1098	19.0871	25.1329	19.2495	ENSG00000087258.13	GNAO1	chr16:56191389-56357444	MB468_CTRL	MB468_W2	OK	18.52	21.1565	0.192022	0.439261	0.39875	0.6037	no
ENSG00000087263.16	OGFOD1	36.841	39.3213	40.4297	16.7199	31.6136	33.1108	ENSG00000087263.16	OGFOD1	chr16:56429132-56520283	MB468_CTRL	MB468_W2	OK	38.864	27.1481	-0.517584	-0.882212	0.12535	0.283636	no
ENSG00000087266.15	SH3BP2	10.5593	18.1378	11.8834	18.1781	32.9748	31.7742	ENSG00000087266.15	SH3BP2	chr4:2793022-2841098	MB468_CTRL	MB468_W2	OK	13.5268	27.6423	1.03106	2.0928	5e-05	0.000470501	yes
ENSG00000087269.15	NOP14	15.7236	18.6516	16.9229	10.5692	10.8996	12.6856	ENSG00000087269.15	NOP14	chr4:2934898-2963385	MB468_CTRL	MB468_W2	OK	17.0994	11.3848	-0.586838	-3.35119	5e-05	0.000470501	yes
ENSG00000087274.16	ADD1	31.8596	35.2359	39.126	25.9889	37.8741	29.9403	ENSG00000087274.16	ADD1	chr4:2843856-2930076	MB468_CTRL	MB468_W2	OK	35.4071	31.2678	-0.179365	-0.372592	0.4198	0.62339	no
ENSG00000087299.11	L2HGDH	11.2174	11.111	11.7698	7.51223	9.6922	7.66726	ENSG00000087299.11	L2HGDH	chr14:50237562-50416461	MB468_CTRL	MB468_W2	OK	11.3661	8.29056	-0.455191	-1.16911	0.0247	0.085982	no
ENSG00000087301.8	TXNDC16	6.63374	4.12498	4.71701	2.0659	2.00946	2.4109	ENSG00000087301.8	TXNDC16	chr14:52430589-52552522	MB468_CTRL	MB468_W2	OK	5.15858	2.16208	-1.25455	-1.17399	0.00315	0.016581	yes
ENSG00000087302.8	C14orf166	118.356	104.975	121.447	98.3321	99.1831	97.2301	ENSG00000087302.8	C14orf166	chr14:51989474-52069228	MB468_CTRL	MB468_W2	OK	114.926	98.2484	-0.226201	-1.01395	0.07655	0.200795	no
ENSG00000087303.17	NID2	0	0	0	0	0	1.35624	ENSG00000087303.17	NID2	chr14:51989474-52069228	MB468_CTRL	MB468_W2	NOTEST	0	0.45208	inf	0	1	1	no
ENSG00000087338.4	GMCL1	10.5301	10.5393	9.13273	3.6235	5.45871	5.95152	ENSG00000087338.4	GMCL1	chr2:69829641-69881396	MB468_CTRL	MB468_W2	OK	10.0673	5.01125	-1.00644	-2.32894	5e-05	0.000470501	yes
ENSG00000087365.15	SF3B2	73.5905	78.1373	83.765	55.4753	67.1402	74.9795	ENSG00000087365.15	SF3B2	chr11:66050728-66069619	MB468_CTRL	MB468_W2	OK	78.4976	65.865	-0.253136	-0.962847	0.07665	0.200957	no
ENSG00000087448.9	KLHL42	12.1627	16.7219	11.5386	13.8022	18.9251	19.8958	ENSG00000087448.9	KLHL42	chr12:27779820-27803040	MB468_CTRL	MB468_W2	OK	13.4744	17.5411	0.380514	0.970171	0.08965	0.224643	no
ENSG00000087460.23	GNAS	165.193	173.173	167.983	125.188	139.397	152.982	ENSG00000087460.23	GNAS	chr20:58818918-58911192	MB468_CTRL	MB468_W2	OK	168.783	139.189	-0.278127	-1.54399	0.004	0.0200833	yes
ENSG00000087470.17	DNM1L	17.0735	20.7867	28.4893	34.5012	22.4866	23.7292	ENSG00000087470.17	DNM1L	chr12:32679199-32755902	MB468_CTRL	MB468_W2	OK	22.1165	26.9057	0.282787	0.575368	0.27585	0.48001	no
ENSG00000087494.15	PTHLH	0.145646	0.278316	0.695945	0	2.56145	2.1984	ENSG00000087494.15	PTHLH	chr12:27958083-27972705	MB468_CTRL	MB468_W2	NOTEST	0.373302	1.58662	2.08754	0	1	1	no
ENSG00000087495.16	PHACTR3	0	0	0	0	0	0	ENSG00000087495.16	PHACTR3	chr20:59577508-59847711	MB468_CTRL	MB468_W2	NOTEST	0	0	0	0	1	1	no
ENSG00000087502.17	ERGIC2	36.4074	47.631	44.0222	49.8194	31.972	40.567	ENSG00000087502.17	ERGIC2	chr12:29149102-29381189	MB468_CTRL	MB468_W2	OK	42.6869	40.7861	-0.065715	-0.119996	0.81955	0.908457	no
ENSG00000087510.6	TFAP2C	39.1491	53.7065	51.5319	21.2945	40.8062	33.3191	ENSG00000087510.6	TFAP2C	chr20:56629301-56639283	MB468_CTRL	MB468_W2	OK	48.1292	31.8066	-0.597584	-2.23816	0.0005	0.00361388	yes
ENSG00000087586.17	AURKA	56.1909	54.8625	54.4891	39.3814	46.7485	49.0533	ENSG00000087586.17	AURKA	chr20:56369388-56392337	MB468_CTRL	MB468_W2	OK	55.1808	45.061	-0.292287	-1.30605	0.0222	0.0790436	no
ENSG00000087589.16	CASS4	0	0	0.0687266	0.176728	0	0	ENSG00000087589.16	CASS4	chr20:56412111-56460387	MB468_CTRL	MB468_W2	NOTEST	0.0229089	0.0589093	1.36259	0	1	1	no
ENSG00000087842.10	PIR	15.4174	11.3771	13.6183	13.678	12.0649	12.0182	ENSG00000087842.10	PIR	chrX:15384798-15556529	MB468_CTRL	MB468_W2	OK	13.4709	12.587	-0.0979091	-0.199469	0.7061	0.840237	no
ENSG00000087884.14	AAMDC	14.9584	15.097	17.6078	12.3657	10.77	10.3652	ENSG00000087884.14	AAMDC	chr11:77821108-77994678	MB468_CTRL	MB468_W2	OK	15.8878	11.167	-0.508675	-0.770352	0.09615	0.236025	no
ENSG00000087903.12	RFX2	3.40514	4.16113	4.46578	3.28541	4.9342	3.71242	ENSG00000087903.12	RFX2	chr19:5978402-6199572	MB468_CTRL	MB468_W2	OK	4.01068	3.97735	-0.0120417	-0.00780332	0.97195	0.986726	no
ENSG00000087995.15	METTL2A	6.39812	8.19744	9.19293	11.1563	5.7401	12.2238	ENSG00000087995.15	METTL2A	chr17:62423866-62450822	MB468_CTRL	MB468_W2	OK	7.92949	9.70674	0.291758	0.712236	0.1935	0.380869	no
ENSG00000088002.11	SULT2B1	13.9258	17.4808	20.8012	8.70204	8.27382	8.41223	ENSG00000088002.11	SULT2B1	chr19:48552074-48599425	MB468_CTRL	MB468_W2	OK	17.4026	8.4627	-1.04011	-2.77977	5e-05	0.000470501	yes
ENSG00000088035.15	ALG6	7.00983	8.80506	8.77073	13.9177	11.4929	11.8714	ENSG00000088035.15	ALG6	chr1:63367589-63438562	MB468_CTRL	MB468_W2	OK	8.1952	12.4273	0.600664	1.20923	0.02285	0.0808708	no
ENSG00000088038.17	CNOT3	22.2465	27.3561	26.0159	32.089	30.0102	32.8067	ENSG00000088038.17	CNOT3	chr19:54137727-54159882	MB468_CTRL	MB468_W2	OK	25.2062	31.6353	0.327758	1.10399	0.04985	0.146567	no
ENSG00000088053.11	GP6	0.117377	0.312912	0.633996	0	2.35847	0	ENSG00000088053.11	GP6	chr19:55006192-55071291	MB468_CTRL	MB468_W2	NOTEST	0.354762	0.786157	1.14797	0	1	1	no
ENSG00000088179.8	PTPN4	11.9613	12.4722	9.51018	13.094	24.507	8.14579	ENSG00000088179.8	PTPN4	chr2:119759630-119983818	MB468_CTRL	MB468_W2	OK	11.3146	15.2489	0.430527	0.484583	0.3064	0.513426	no
ENSG00000088205.12	DDX18	35.2072	40.2791	37.9745	27.4385	30.9734	29.3273	ENSG00000088205.12	DDX18	chr2:117814649-117832379	MB468_CTRL	MB468_W2	OK	37.8203	29.2464	-0.3709	-1.43092	0.01525	0.0589292	no
ENSG00000088247.16	KHSRP	202.566	253.339	208.041	163.6	142.667	191.33	ENSG00000088247.16	KHSRP	chr19:6413347-6424794	MB468_CTRL	MB468_W2	OK	221.315	165.866	-0.416087	-1.67445	0.00305	0.0161474	yes
ENSG00000088256.8	GNA11	19.7088	22.6061	24.1775	12.7357	18.1813	19.2305	ENSG00000088256.8	GNA11	chr19:3094409-3124004	MB468_CTRL	MB468_W2	OK	22.1641	16.7158	-0.407012	-1.22789	0.0178	0.0663756	no
ENSG00000088280.18	ASAP3	1.65466	2.50578	5.30399	13.4078	7.24274	7.0428	ENSG00000088280.18	ASAP3	chr1:23428562-23484568	MB468_CTRL	MB468_W2	OK	3.15481	9.23111	1.54895	2.1746	5e-05	0.000470501	yes
ENSG00000088298.12	EDEM2	8.38961	6.76972	6.76544	5.78063	9.23652	7.73617	ENSG00000088298.12	EDEM2	chr20:35115356-35147364	MB468_CTRL	MB468_W2	OK	7.30826	7.58444	0.0535159	0.167547	0.76955	0.880131	no
ENSG00000088305.18	DNMT3B	1.54756	2.55661	1.99998	1.73784	3.01726	2.05788	ENSG00000088305.18	DNMT3B	chr20:32762384-32809356	MB468_CTRL	MB468_W2	NOTEST	2.03472	2.27099	0.158493	0	1	1	no
ENSG00000088320.3	REM1	0	0	0	0	0	0	ENSG00000088320.3	REM1	chr20:31465505-31484905	MB468_CTRL	MB468_W2	NOTEST	0	0	0	0	1	1	no
ENSG00000088325.15	TPX2	28.9637	34.4469	36.5959	19.692	25.1766	26.9959	ENSG00000088325.15	TPX2	chr20:31739270-31801805	MB468_CTRL	MB468_W2	OK	33.3355	23.9548	-0.476743	-3.21818	5e-05	0.000470501	yes
ENSG00000088340.15	FER1L4	0.445552	0.214776	0.100912	1.40212	1.0084	4.72724	ENSG00000088340.15	FER1L4	chr20:35558736-35607562	MB468_CTRL	MB468_W2	NOTEST	0.253746	2.37926	3.22905	0	1	1	no
ENSG00000088356.5	PDRG1	5.41138	7.28968	5.0149	7.40707	6.45665	5.84108	ENSG00000088356.5	PDRG1	chr20:31847636-31952092	MB468_CTRL	MB468_W2	OK	5.90532	6.56827	0.153497	0.503861	0.37925	0.586361	no
ENSG00000088367.21	EPB41L1	26.722	34.4201	20.8014	18.0642	37.8496	42.1723	ENSG00000088367.21	EPB41L1	chr20:36091503-36232799	MB468_CTRL	MB468_W2	OK	27.3145	32.6954	0.259419	0.285919	0.57135	0.745899	no
ENSG00000088386.16	SLC15A1	0.715204	0.681831	0.381946	0.86315	0.432997	0.17816	ENSG00000088386.16	SLC15A1	chr13:98683800-98752654	MB468_CTRL	MB468_W2	NOTEST	0.592994	0.491436	-0.271014	0	1	1	no
ENSG00000088387.18	DOCK9	72.1113	69.9875	56.102	31.3772	40.8717	47.5388	ENSG00000088387.18	DOCK9	chr13:98793428-99086625	MB468_CTRL	MB468_W2	OK	66.067	39.9292	-0.726484	-1.57434	0.00585	0.0273837	yes
ENSG00000088448.14	ANKRD10	29.8478	47.8114	54.4635	93.2668	276.834	123.778	ENSG00000088448.14	ANKRD10	chr13:110878539-110915069	MB468_CTRL	MB468_W2	OK	44.0409	164.626	1.90228	6.26449	5e-05	0.000470501	yes
ENSG00000088451.10	TGDS	6.0613	8.32071	7.84569	7.15823	10.2522	11.9122	ENSG00000088451.10	TGDS	chr13:94574050-94596257	MB468_CTRL	MB468_W2	OK	7.40923	9.77422	0.399657	0.986904	0.07405	0.196147	no
ENSG00000088538.12	DOCK3	0.562325	0.943418	1.04741	1.48844	1.80413	1.14156	ENSG00000088538.12	DOCK3	chr3:50675240-51384198	MB468_CTRL	MB468_W2	NOTEST	0.851052	1.47805	0.796373	0	1	1	no
ENSG00000088543.14	C3orf18	0.93793	0.166781	0.403017	0	0.195352	0.165587	ENSG00000088543.14	C3orf18	chr3:50558024-50596168	MB468_CTRL	MB468_W2	NOTEST	0.502576	0.120313	-2.06255	0	1	1	no
ENSG00000088682.13	COQ9	26.6995	27.3775	29.9972	40.5597	29.7008	26.2182	ENSG00000088682.13	COQ9	chr16:57428168-57487327	MB468_CTRL	MB468_W2	OK	28.0248	32.1596	0.198545	0.359131	0.4325	0.634587	no
ENSG00000088726.15	TMEM40	14.4958	15.5333	23.1599	15.732	11.049	13.4892	ENSG00000088726.15	TMEM40	chr3:12733524-12769457	MB468_CTRL	MB468_W2	OK	17.7297	13.4234	-0.401412	-0.465991	0.37735	0.584533	no
ENSG00000088727.12	KIF9	10.3026	8.9598	7.95392	5.71889	15.6584	16.3123	ENSG00000088727.12	KIF9	chr3:47164496-47346816	MB468_CTRL	MB468_W2	OK	9.0721	12.5632	0.469698	0.616094	0.23855	0.437254	no
ENSG00000088756.12	ARHGAP28	9.39702	10.2871	9.45561	4.01811	3.37055	9.79308	ENSG00000088756.12	ARHGAP28	chr18:6727052-6915716	MB468_CTRL	MB468_W2	OK	9.71325	5.72724	-0.762113	-1.02054	0.0294	0.0985882	no
ENSG00000088766.11	CRLS1	19.9113	11.1618	16.3161	15.5711	14.0058	15.1889	ENSG00000088766.11	CRLS1	chr20:6006089-6040053	MB468_CTRL	MB468_W2	OK	15.7964	14.9219	-0.0821613	-0.172325	0.74895	0.867674	no
ENSG00000088808.16	PPP1R13B	8.0724	10.1957	9.56694	14.4985	10.9712	15.9945	ENSG00000088808.16	PPP1R13B	chr14:103733751-103847590	MB468_CTRL	MB468_W2	OK	9.27833	13.8214	0.574968	1.14119	0.01305	0.0520806	no
ENSG00000088812.17	ATRN	9.54643	9.48605	10.5673	6.39283	7.20731	7.84106	ENSG00000088812.17	ATRN	chr20:3471039-3651122	MB468_CTRL	MB468_W2	OK	9.8666	7.14707	-0.465202	-2.75328	5e-05	0.000470501	yes
ENSG00000088826.17	SMOX	8.368	7.20214	6.72707	5.76993	8.32139	8.05701	ENSG00000088826.17	SMOX	chr20:4120979-4187747	MB468_CTRL	MB468_W2	OK	7.43241	7.38278	-0.00966614	-0.014671	0.9697	0.985565	no
ENSG00000088827.12	SIGLEC1	0	0	0	0	0	0	ENSG00000088827.12	SIGLEC1	chr20:3686969-3707128	MB468_CTRL	MB468_W2	NOTEST	0	0	0	0	1	1	no
ENSG00000088832.15	FKBP1A	178.021	193.918	203.003	109.363	107.337	126.985	ENSG00000088832.15	FKBP1A	chr20:1309908-1393172	MB468_CTRL	MB468_W2	OK	191.647	114.561	-0.742336	-4.08148	5e-05	0.000470501	yes
ENSG00000088833.17	NSFL1C	47.2109	50.5482	50.3482	26.5963	32.9962	43.1768	ENSG00000088833.17	NSFL1C	chr20:1442161-1491587	MB468_CTRL	MB468_W2	OK	49.3691	34.2564	-0.527234	-2.56099	5e-05	0.000470501	yes
ENSG00000088836.12	SLC4A11	22.1714	21.5449	22.243	19.1159	24.9936	25.7106	ENSG00000088836.12	SLC4A11	chr20:3227416-3239190	MB468_CTRL	MB468_W2	OK	21.9864	23.2734	0.0820691	0.246551	0.66855	0.815377	no
ENSG00000088854.12	C20orf194	1.21235	1.28841	0.921427	2.15292	2.47676	1.93065	ENSG00000088854.12	C20orf194	chr20:3249304-3407625	MB468_CTRL	MB468_W2	NOTEST	1.14073	2.18678	0.938848	0	1	1	no
ENSG00000088876.11	ZNF343	3.67061	4.82772	2.86641	6.18069	7.65345	10.664	ENSG00000088876.11	ZNF343	chr20:2461633-2524702	MB468_CTRL	MB468_W2	OK	3.78825	8.16605	1.10811	1.33326	0.0084	0.0365649	yes
ENSG00000088881.20	EBF4	1.28819	2.58852	1.53429	3.2093	8.9913	2.96009	ENSG00000088881.20	EBF4	chr20:2692877-2760108	MB468_CTRL	MB468_W2	OK	1.80367	5.05356	1.48637	0.885591	0.01525	0.0589292	no
ENSG00000088882.7	CPXM1	0.150897	0.076778	0	0.191002	0	0.224601	ENSG00000088882.7	CPXM1	chr20:2794068-2800637	MB468_CTRL	MB468_W2	NOTEST	0.0758916	0.138534	0.868231	0	1	1	no
ENSG00000088888.17	MAVS	10.0926	12.1252	10.5332	13.6726	18.6394	15.5755	ENSG00000088888.17	MAVS	chr20:3846798-3876123	MB468_CTRL	MB468_W2	OK	10.917	15.9625	0.548108	3.6917	5e-05	0.000470501	yes
ENSG00000088899.14	RP5-1187M17.10	7.12061	7.18178	7.0003	10.557	13.897	11.3958	ENSG00000088899.14	RP5-1187M17.10	chr20:3162616-3173592	MB468_CTRL	MB468_W2	OK	7.1009	11.9499	0.750931	3.66602	5e-05	0.000470501	yes
ENSG00000088930.7	XRN2	28.2274	27.4241	29.5501	11.4911	13.5784	18.4986	ENSG00000088930.7	XRN2	chr20:21302730-21389827	MB468_CTRL	MB468_W2	OK	28.4005	14.5227	-0.967611	-6.07035	5e-05	0.000470501	yes
ENSG00000088970.15	KIZ	4.38595	3.7082	4.01218	5.89118	6.82913	7.87692	ENSG00000088970.15	KIZ	chr20:21125982-21246622	MB468_CTRL	MB468_W2	OK	4.03544	6.86574	0.766688	0.625076	0.10555	0.251798	no
ENSG00000088986.10	DYNLL1	211.133	217.922	247.939	358.005	479.24	355.446	ENSG00000088986.10	DYNLL1	chr12:120469849-120498493	MB468_CTRL	MB468_W2	OK	225.664	397.564	0.817007	4.93838	5e-05	0.000470501	yes
ENSG00000088992.17	TESC	0	0	0	0	0	0	ENSG00000088992.17	TESC	chr12:117038922-117099479	MB468_CTRL	MB468_W2	NOTEST	0	0	0	0	1	1	no
ENSG00000089006.16	SNX5	62.7262	62.4111	65.1678	86.8709	97.1888	91.3479	ENSG00000089006.16	SNX5	chr20:17941596-18059188	MB468_CTRL	MB468_W2	OK	63.435	91.8025	0.533255	2.29322	5e-05	0.000470501	yes
ENSG00000089009.15	RPL6	297.509	331.882	331.6	238.719	265.372	300.668	ENSG00000089009.15	RPL6	chr12:112405189-112509913	MB468_CTRL	MB468_W2	OK	320.33	268.253	-0.255966	-1.20631	0.0331	0.107466	no
ENSG00000089012.14	SIRPG	1.53641	1.53952	1.12194	0	1.39788	1.18781	ENSG00000089012.14	SIRPG	chr20:1629151-1657779	MB468_CTRL	MB468_W2	NOTEST	1.39929	0.861898	-0.699104	0	1	1	no
ENSG00000089022.13	MAPKAPK5	23.277	30.4976	33.4439	28.1941	35.9446	31.8358	ENSG00000089022.13	MAPKAPK5	chr12:111839763-111902238	MB468_CTRL	MB468_W2	OK	29.0729	31.9915	0.138017	0.308405	0.58855	0.757986	no
ENSG00000089041.16	P2RX7	1.5039	0.189365	0.493685	0.92814	0.999992	1.12344	ENSG00000089041.16	P2RX7	chr12:121132818-121188032	MB468_CTRL	MB468_W2	NOTEST	0.728983	1.01719	0.480633	0	1	1	no
ENSG00000089048.14	ESF1	5.72335	6.35051	7.59015	5.02597	4.31892	7.05049	ENSG00000089048.14	ESF1	chr20:13714321-13784886	MB468_CTRL	MB468_W2	OK	6.55467	5.46513	-0.262268	-1.05398	0.0687	0.185734	no
ENSG00000089050.15	RBBP9	12.5088	13.6681	14.336	13.0155	13.0905	14.6838	ENSG00000089050.15	RBBP9	chr20:18486539-18497243	MB468_CTRL	MB468_W2	OK	13.5043	13.5966	0.0098237	0.0299534	0.9476	0.974768	no
ENSG00000089053.12	ANAPC5	36.6076	35.9068	37.7131	29.9452	33.8949	28.9969	ENSG00000089053.12	ANAPC5	chr12:121308244-121399896	MB468_CTRL	MB468_W2	OK	36.7425	30.9457	-0.24771	-0.84249	0.08665	0.219239	no
ENSG00000089057.14	SLC23A2	18.8064	16.4908	16.7952	13.7972	11.1256	12.9066	ENSG00000089057.14	SLC23A2	chr20:4852355-5010293	MB468_CTRL	MB468_W2	OK	17.3641	12.6098	-0.461567	-1.99917	5e-05	0.000470501	yes
ENSG00000089060.11	SLC8B1	5.49432	3.96896	5.21416	10.8042	8.15993	8.61399	ENSG00000089060.11	SLC8B1	chr12:113298758-113391625	MB468_CTRL	MB468_W2	OK	4.89248	9.19271	0.909924	1.19136	0.00405	0.0202899	yes
ENSG00000089063.14	TMEM230	74.9367	70.8854	76.5428	62.3392	56.5431	70.3267	ENSG00000089063.14	TMEM230	chr20:5068231-5113103	MB468_CTRL	MB468_W2	OK	74.1216	63.0697	-0.232949	-1.27824	0.0195	0.0713287	no
ENSG00000089091.16	DZANK1	0.0564448	0.184732	0.431204	0.944878	1.92343	1.11096	ENSG00000089091.16	DZANK1	chr20:18383366-18484643	MB468_CTRL	MB468_W2	NOTEST	0.224127	1.32642	2.56515	0	1	1	no
ENSG00000089094.17	KDM2B	18.8101	20.7579	19.5671	14.2996	21.2918	20.3545	ENSG00000089094.17	KDM2B	chr12:121400040-121593504	MB468_CTRL	MB468_W2	OK	19.7117	18.6486	-0.0799815	-0.144347	0.7596	0.874124	no
ENSG00000089101.17	CFAP61	0.123679	0	0	0	0.799627	0	ENSG00000089101.17	CFAP61	chr20:20034367-20360702	MB468_CTRL	MB468_W2	NOTEST	0.0412265	0.266542	2.69272	0	1	1	no
ENSG00000089116.3	LHX5	0	0	0	0	0	0	ENSG00000089116.3	LHX5	chr12:113462033-113480624	MB468_CTRL	MB468_W2	NOTEST	0	0	0	0	1	1	no
ENSG00000089123.15	TASP1	7.10591	7.3137	8.47548	8.19294	8.19309	8.10497	ENSG00000089123.15	TASP1	chr20:13389391-13638940	MB468_CTRL	MB468_W2	OK	7.6317	8.16367	0.0972139	0.196676	0.6844	0.825995	no
ENSG00000089127.12	OAS1	6.79688	8.89735	8.33012	4.18386	2.90896	4.33323	ENSG00000089127.12	OAS1	chr12:112906776-113017751	MB468_CTRL	MB468_W2	OK	8.00812	3.80869	-1.07217	-1.22763	0.00445	0.0219134	yes
ENSG00000089154.10	GCN1	22.6771	27.6584	25.2051	25.3002	47.9959	27.5621	ENSG00000089154.10	GCN1	chr12:120127202-120194710	MB468_CTRL	MB468_W2	OK	25.1802	33.6194	0.417005	0.541893	0.25245	0.453058	no
ENSG00000089157.15	RPLP0	945.596	1001.94	1021.4	880.756	1123.27	900.808	ENSG00000089157.15	RPLP0	chr12:120196685-120201235	MB468_CTRL	MB468_W2	OK	989.647	968.279	-0.0314911	-0.172306	0.76325	0.876289	no
ENSG00000089159.16	PXN	23.4611	36.055	31.162	22.3732	38.5374	29.7551	ENSG00000089159.16	PXN	chr12:120201290-120265771	MB468_CTRL	MB468_W2	OK	30.2261	30.2219	-0.000197962	-0.000550113	0.99925	0.999523	no
ENSG00000089163.4	SIRT4	0.703077	0	0.810897	0	0	1.32495	ENSG00000089163.4	SIRT4	chr12:120302315-120313341	MB468_CTRL	MB468_W2	NOTEST	0.504658	0.441651	-0.192399	0	1	1	no
ENSG00000089169.14	RPH3A	0	0	0	0	0	0	ENSG00000089169.14	RPH3A	chr12:112570379-112898881	MB468_CTRL	MB468_W2	NOTEST	0	0	0	0	1	1	no
ENSG00000089177.18	KIF16B	6.43467	9.55544	8.9903	4.742	5.03378	6.44443	ENSG00000089177.18	KIF16B	chr20:16272103-16573434	MB468_CTRL	MB468_W2	OK	8.3268	5.40674	-0.623004	-1.99692	5e-05	0.000470501	yes
ENSG00000089195.14	TRMT6	22.9864	25.4303	26.659	14.4862	15.9779	16.8498	ENSG00000089195.14	TRMT6	chr20:5937234-5950558	MB468_CTRL	MB468_W2	OK	25.0253	15.7713	-0.666086	-3.98325	5e-05	0.000470501	yes
ENSG00000089199.9	CHGB	0	0.0621047	0.0600281	0.097456	0	0	ENSG00000089199.9	CHGB	chr20:5911429-5925361	MB468_CTRL	MB468_W2	NOTEST	0.040711	0.0324853	-0.325628	0	1	1	no
ENSG00000089220.4	PEBP1	114.361	110.143	115.334	54.7861	85.8035	71.5483	ENSG00000089220.4	PEBP1	chr12:118063592-118145584	MB468_CTRL	MB468_W2	OK	113.279	70.7127	-0.679846	-3.1229	5e-05	0.000470501	yes
ENSG00000089225.19	TBX5	0	0	0	0	0	0	ENSG00000089225.19	TBX5	chr12:114353930-114412831	MB468_CTRL	MB468_W2	NOTEST	0	0	0	0	1	1	no
ENSG00000089234.15	BRAP	6.50495	6.40257	7.62312	5.06955	6.37618	7.32066	ENSG00000089234.15	BRAP	chr12:111642145-111685986	MB468_CTRL	MB468_W2	OK	6.84354	6.25547	-0.129626	-0.462685	0.40735	0.611542	no
ENSG00000089248.6	ERP29	51.3709	57.4809	68.0942	33.287	53.605	43.5495	ENSG00000089248.6	ERP29	chr12:112013315-112023451	MB468_CTRL	MB468_W2	OK	58.982	43.4805	-0.439907	-2.06858	0.0004	0.00299751	yes
ENSG00000089250.18	NOS1	0	0	0	0	0	0	ENSG00000089250.18	NOS1	chr12:117208141-117452170	MB468_CTRL	MB468_W2	NOTEST	0	0	0	0	1	1	no
ENSG00000089280.18	FUS	129.643	121.774	133.301	126.396	144.723	149.985	ENSG00000089280.18	FUS	chr16:31180109-31194871	MB468_CTRL	MB468_W2	OK	128.239	140.368	0.130377	0.433035	0.4453	0.646177	no
ENSG00000089289.15	IGBP1	16.6329	12.5021	17.1719	11.9895	10.7873	16.0073	ENSG00000089289.15	IGBP1	chrX:70133448-70166324	MB468_CTRL	MB468_W2	OK	15.4356	12.928	-0.25576	-1.30348	0.0231	0.0815666	no
ENSG00000089327.14	FXYD5	69.7535	75.5159	84.3574	82.3312	104.65	59.5211	ENSG00000089327.14	FXYD5	chr19:35154729-35169883	MB468_CTRL	MB468_W2	OK	76.5423	82.1674	0.102309	0.307642	0.57095	0.745708	no
ENSG00000089335.20	ZNF302	8.2074	10.0192	7.62755	18.2016	22.88	20.1734	ENSG00000089335.20	ZNF302	chr19:34677638-34686397	MB468_CTRL	MB468_W2	OK	8.61806	20.4183	1.24443	3.10684	5e-05	0.000470501	yes
ENSG00000089351.14	GRAMD1A	19.2851	27.296	25.3279	36.5642	54.797	46.8531	ENSG00000089351.14	GRAMD1A	chr19:34994783-35026471	MB468_CTRL	MB468_W2	OK	23.9697	46.0714	0.942662	3.00159	5e-05	0.000470501	yes
ENSG00000089356.17	FXYD3	61.624	63.9669	68.4725	90.552	140.884	143.891	ENSG00000089356.17	FXYD3	chr19:35115878-35124324	MB468_CTRL	MB468_W2	OK	64.6878	125.109	0.95162	4.39018	5e-05	0.000470501	yes
ENSG00000089472.16	HEPH	0	0	0	0	0	0	ENSG00000089472.16	HEPH	chrX:66162548-66268867	MB468_CTRL	MB468_W2	NOTEST	0	0	0	0	1	1	no
ENSG00000089486.16	CDIP1	0	0	0	0	0	0	ENSG00000089486.16	CDIP1	chr16:4510674-4538828	MB468_CTRL	MB468_W2	NOTEST	0	0	0	0	1	1	no
ENSG00000089505.17	CMTM1	1.68371	0.832878	0.594395	2.60217	2.97902	2.38107	ENSG00000089505.17	CMTM1	chr16:66552562-66579137	MB468_CTRL	MB468_W2	OK	1.03699	2.65408	1.35581	0.512058	0.0013	0.00802013	yes
ENSG00000089558.8	KCNH4	0	0	0.0781848	0	0	0	ENSG00000089558.8	KCNH4	chr17:42156890-42181278	MB468_CTRL	MB468_W2	NOTEST	0.0260616	0	#NAME?	0	1	1	no
ENSG00000089597.16	GANAB	115.689	127.988	124.494	89.4815	74.6878	82.8823	ENSG00000089597.16	GANAB	chr11:62624825-62646726	MB468_CTRL	MB468_W2	OK	122.724	82.3505	-0.575564	-2.16525	0.0001	0.000882755	yes
ENSG00000089639.10	GMIP	13.7453	17.7521	19.0818	13.3739	19.1943	16.3345	ENSG00000089639.10	GMIP	chr19:19629475-19643667	MB468_CTRL	MB468_W2	OK	16.8598	16.3009	-0.0486321	-0.12862	0.80925	0.903159	no
ENSG00000089682.16	RBM41	16.7278	16.7013	15.3373	16.5766	17.9441	19.4972	ENSG00000089682.16	RBM41	chrX:107064419-107118823	MB468_CTRL	MB468_W2	OK	16.2555	18.006	0.147551	0.491631	0.29875	0.50567	no
ENSG00000089685.14	BIRC5	99.0951	100.708	109.63	90.3608	121.002	116.448	ENSG00000089685.14	BIRC5	chr17:78214185-78225636	MB468_CTRL	MB468_W2	OK	103.144	109.27	0.0832324	0.482217	0.39185	0.597226	no
ENSG00000089692.8	LAG3	0.530036	0	0	2.16718	0	0	ENSG00000089692.8	LAG3	chr12:6772511-6778455	MB468_CTRL	MB468_W2	NOTEST	0.176679	0.722394	2.03166	0	1	1	no
ENSG00000089693.10	MLF2	62.0049	69.9061	70.0782	48.0036	52.5715	57.73	ENSG00000089693.10	MLF2	chr12:6747995-6770952	MB468_CTRL	MB468_W2	OK	67.3297	52.7684	-0.35157	-1.859	0.00095	0.00618132	yes
ENSG00000089723.9	OTUB2	0.746457	0.778288	0.839895	0.280071	0.185923	0.592598	ENSG00000089723.9	OTUB2	chr14:94026328-94081245	MB468_CTRL	MB468_W2	NOTEST	0.788213	0.352864	-1.15947	0	1	1	no
ENSG00000089737.15	DDX24	27.9219	27.6946	30.2446	16.532	15.377	22.7903	ENSG00000089737.15	DDX24	chr14:94026328-94081245	MB468_CTRL	MB468_W2	OK	28.6204	18.2331	-0.650483	-3.03214	5e-05	0.000470501	yes
ENSG00000089775.11	ZBTB25	2.47338	2.08329	2.90694	4.04399	5.87595	5.07354	ENSG00000089775.11	ZBTB25	chr14:64388030-64546173	MB468_CTRL	MB468_W2	OK	2.48787	4.99782	1.00639	0.941279	0.0742	0.196416	no
ENSG00000089818.16	NECAP1	7.99063	7.22732	11.9836	8.84229	6.39402	8.32516	ENSG00000089818.16	NECAP1	chr12:8082210-8097771	MB468_CTRL	MB468_W2	OK	9.06717	7.85382	-0.207258	-0.314723	0.50045	0.691638	no
ENSG00000089820.15	ARHGAP4	1.77345	1.32914	1.44539	0.151441	0	3.42851	ENSG00000089820.15	ARHGAP4	chrX:153861513-153935223	MB468_CTRL	MB468_W2	NOTEST	1.51599	1.19332	-0.345285	0	1	1	no
ENSG00000089847.12	ANKRD24	0	0.0338221	0	0	0	0.101495	ENSG00000089847.12	ANKRD24	chr19:4183353-4224814	MB468_CTRL	MB468_W2	NOTEST	0.011274	0.0338316	1.58537	0	1	1	no
ENSG00000089876.11	DHX32	30.9908	24.5081	28.7085	16.6168	22.5636	20.6459	ENSG00000089876.11	DHX32	chr10:125823545-125896436	MB468_CTRL	MB468_W2	OK	28.0692	19.9421	-0.493169	-1.42982	0.01455	0.0568293	no
ENSG00000089902.9	RCOR1	13.3711	12.2991	14.6721	7.73003	12.006	11.951	ENSG00000089902.9	RCOR1	chr14:102592660-102730576	MB468_CTRL	MB468_W2	OK	13.4474	10.5624	-0.3484	-0.747504	0.13665	0.301046	no
ENSG00000089916.17	GPATCH2L	9.86597	13.5414	7.90626	7.0879	20.4441	13.7988	ENSG00000089916.17	GPATCH2L	chr14:76131706-76263474	MB468_CTRL	MB468_W2	OK	10.4379	13.7769	0.400423	0.637252	0.24435	0.44433	no
ENSG00000090006.17	LTBP4	9.70343	9.42263	9.59047	14.1489	26.712	21.6409	ENSG00000090006.17	LTBP4	chr19:40592882-40629818	MB468_CTRL	MB468_W2	OK	9.57218	20.834	1.12202	1.36437	5e-05	0.000470501	yes
ENSG00000090013.9	BLVRB	50.066	62.7445	58.9558	48.1231	41.1231	50.513	ENSG00000090013.9	BLVRB	chr19:40447788-40465840	MB468_CTRL	MB468_W2	OK	57.2554	46.5864	-0.297504	-1.18307	0.04175	0.128547	no
ENSG00000090020.10	SLC9A1	13.0466	9.16602	8.12779	11.2485	11.5165	12.6613	ENSG00000090020.10	SLC9A1	chr1:27098814-27166981	MB468_CTRL	MB468_W2	OK	10.1135	11.8087	0.223576	0.390507	0.4522	0.651931	no
ENSG00000090054.13	SPTLC1	27.6802	26.5768	27.8819	16.4892	20.243	19.8181	ENSG00000090054.13	SPTLC1	chr9:92031998-92115384	MB468_CTRL	MB468_W2	OK	27.3797	18.8501	-0.53853	-1.79284	0.0011	0.00698981	yes
ENSG00000090060.17	PAPOLA	44.7295	45.3623	44.5525	35.9865	64.1458	44.6115	ENSG00000090060.17	PAPOLA	chr14:96500809-96567111	MB468_CTRL	MB468_W2	OK	44.8814	48.248	0.104349	0.249733	0.55	0.729908	no
ENSG00000090061.17	CCNK	16.5844	29.9961	23.1288	15.5387	16.9883	30.1798	ENSG00000090061.17	CCNK	chr14:99481168-99604026	MB468_CTRL	MB468_W2	OK	23.2365	20.9023	-0.152731	-0.193784	0.64935	0.802319	no
ENSG00000090097.20	PCBP4	7.37058	10.4211	6.07368	6.44102	8.19895	7.98225	ENSG00000090097.20	PCBP4	chr3:51955313-51989202	MB468_CTRL	MB468_W2	OK	7.95511	7.54074	-0.0771745	-0.120903	0.77405	0.882688	no
ENSG00000090104.11	RGS1	0	0	0	0	0	0	ENSG00000090104.11	RGS1	chr1:192575726-192580031	MB468_CTRL	MB468_W2	NOTEST	0	0	0	0	1	1	no
ENSG00000090238.11	YPEL3	7.51129	7.25939	8.12164	7.04328	10.8823	6.25775	ENSG00000090238.11	YPEL3	chr16:30092313-30104116	MB468_CTRL	MB468_W2	OK	7.63077	8.06111	0.0791495	0.105169	0.80825	0.902757	no
ENSG00000090263.15	MRPS33	30.4973	33.4689	29.6021	35.8641	62.5405	51.0975	ENSG00000090263.15	MRPS33	chr7:141002609-141015228	MB468_CTRL	MB468_W2	OK	31.1894	49.834	0.676073	2.69466	5e-05	0.000470501	yes
ENSG00000090266.12	NDUFB2	95.7994	110.047	119.922	79.8782	138.469	107.359	ENSG00000090266.12	NDUFB2	chr7:140518419-140924764	MB468_CTRL	MB468_W2	OK	108.589	108.569	-0.000278074	-0.000896011	0.999	0.999382	no
ENSG00000090273.13	NUDC	32.5936	41.0224	45.2284	23.6964	23.3102	30.3058	ENSG00000090273.13	NUDC	chr1:26890487-26946862	MB468_CTRL	MB468_W2	OK	39.6148	25.7708	-0.620303	-3.56405	5e-05	0.000470501	yes
ENSG00000090316.15	MAEA	27.8344	22.8205	24.7113	15.4963	29.1433	27.7722	ENSG00000090316.15	MAEA	chr4:1289850-1340147	MB468_CTRL	MB468_W2	OK	25.1221	24.1373	-0.0576951	-0.211454	0.69	0.829699	no
ENSG00000090339.8	ICAM1	13.4468	18.7011	16.3394	27.4824	14.916	19.6221	ENSG00000090339.8	ICAM1	chr19:10251900-10289019	MB468_CTRL	MB468_W2	OK	16.1624	20.6735	0.355142	0.654868	0.2372	0.435695	no
ENSG00000090372.14	STRN4	33.8954	33.8135	42.0426	43.8666	55.8287	59.268	ENSG00000090372.14	STRN4	chr19:46719506-46789043	MB468_CTRL	MB468_W2	OK	36.5838	52.9877	0.534452	1.35326	0.0113	0.0464053	yes
ENSG00000090376.9	IRAK3	0.38758	0.126695	0.344539	1.79456	0.243553	0.20423	ENSG00000090376.9	IRAK3	chr12:66188878-66257434	MB468_CTRL	MB468_W2	NOTEST	0.286271	0.747446	1.38459	0	1	1	no
ENSG00000090382.6	LYZ	0	0.341405	0	0	0	0	ENSG00000090382.6	LYZ	chr12:69348340-69354234	MB468_CTRL	MB468_W2	NOTEST	0.113802	0	#NAME?	0	1	1	no
ENSG00000090402.7	SI	0	0	0	0	0	0	ENSG00000090402.7	SI	chr3:164978897-165078495	MB468_CTRL	MB468_W2	NOTEST	0	0	0	0	1	1	no
ENSG00000090432.6	MUL1	10.3165	11.9171	11.0012	6.08614	9.3015	10.0768	ENSG00000090432.6	MUL1	chr1:20499447-20508161	MB468_CTRL	MB468_W2	OK	11.0783	8.48813	-0.384214	-1.48723	0.0118	0.0480335	yes
ENSG00000090447.11	TFAP4	11.6641	15.7218	15.3768	12.6414	16.3916	17.0056	ENSG00000090447.11	TFAP4	chr16:4257185-4273075	MB468_CTRL	MB468_W2	OK	14.2542	15.3462	0.106489	0.36476	0.5005	0.691638	no
ENSG00000090470.14	PDCD7	11.475	11.0979	10.2106	7.93188	10.1631	11.9766	ENSG00000090470.14	PDCD7	chr15:65117378-65133836	MB468_CTRL	MB468_W2	OK	10.9279	10.0239	-0.12457	-0.355436	0.4668	0.663892	no
ENSG00000090487.10	SPG21	43.1425	45.1063	43.1526	41.0248	44.2657	43.6564	ENSG00000090487.10	SPG21	chr15:64963020-64990310	MB468_CTRL	MB468_W2	OK	43.8005	42.9823	-0.027205	-0.107213	0.8472	0.924374	no
ENSG00000090512.11	FETUB	0	0	0	0	0	0	ENSG00000090512.11	FETUB	chr3:186538440-186773476	MB468_CTRL	MB468_W2	NOTEST	0	0	0	0	1	1	no
ENSG00000090520.11	DNAJB11	27.5682	27.4717	31.2084	17.5328	21.8804	25.8396	ENSG00000090520.11	DNAJB11	chr3:186538440-186773476	MB468_CTRL	MB468_W2	OK	28.7494	21.7509	-0.402456	-2.01645	0.00065	0.004501	yes
ENSG00000090530.9	P3H2	4.30067	4.54717	3.38784	4.01398	6.41369	3.42459	ENSG00000090530.9	P3H2	chr3:189956727-190144846	MB468_CTRL	MB468_W2	OK	4.07856	4.61742	0.179028	0.189252	0.63545	0.792715	no
ENSG00000090534.17	THPO	0	0	0	0	0	0	ENSG00000090534.17	THPO	chr3:184371934-184378144	MB468_CTRL	MB468_W2	NOTEST	0	0	0	0	1	1	no
ENSG00000090539.15	CHRD	0.069704	0	0.570715	0.107003	0	0	ENSG00000090539.15	CHRD	chr3:184380072-184390736	MB468_CTRL	MB468_W2	NOTEST	0.213473	0.0356676	-2.58137	0	1	1	no
ENSG00000090554.12	FLT3LG	2.42323	1.61352	1.79055	0.925769	6.14786	4.39907	ENSG00000090554.12	FLT3LG	chr19:49446297-49492308	MB468_CTRL	MB468_W2	OK	1.94244	3.82423	0.977305	0.291165	0.1991	0.387954	no
ENSG00000090565.15	RAB11FIP3	7.2503	4.06495	4.90685	9.48398	15.2909	15.0025	ENSG00000090565.15	RAB11FIP3	chr16:425618-523011	MB468_CTRL	MB468_W2	OK	5.40736	13.2591	1.29399	1.61441	0.0009	0.00591691	yes
ENSG00000090581.9	GNPTG	2.89769	5.95002	3.08022	6.67339	11.4184	14.0076	ENSG00000090581.9	GNPTG	chr16:1351922-1414751	MB468_CTRL	MB468_W2	OK	3.97598	10.6998	1.4282	1.46344	0.0012	0.00752479	yes
ENSG00000090612.20	ZNF268	5.82132	6.0588	5.8213	10.5861	8.33114	7.74153	ENSG00000090612.20	ZNF268	chr12:133130574-133214831	MB468_CTRL	MB468_W2	OK	5.90047	8.88627	0.590747	0.86976	0.02745	0.0934167	no
ENSG00000090615.13	GOLGA3	21.1458	21.0011	16.3785	8.94523	16.724	10.2819	ENSG00000090615.13	GOLGA3	chr12:132768908-132956306	MB468_CTRL	MB468_W2	OK	19.5085	11.9837	-0.703027	-0.990042	0.0484	0.143257	no
ENSG00000090621.13	PABPC4	350.402	368.66	376.129	340.973	350.089	433.545	ENSG00000090621.13	PABPC4	chr1:39560815-39576790	MB468_CTRL	MB468_W2	OK	365.064	374.869	0.0382399	0.143651	0.7921	0.893541	no
ENSG00000090661.11	CERS4	8.57125	7.34179	8.6356	5.20922	9.3816	12.2588	ENSG00000090661.11	CERS4	chr19:8206735-8262421	MB468_CTRL	MB468_W2	OK	8.18288	8.94987	0.129258	0.176646	0.6839	0.825581	no
ENSG00000090674.15	MCOLN1	6.79751	8.67251	5.20097	5.8405	11.3106	8.31878	ENSG00000090674.15	MCOLN1	chr19:7522625-7561764	MB468_CTRL	MB468_W2	OK	6.89033	8.48998	0.301188	0.345912	0.4539	0.653405	no
ENSG00000090686.15	USP48	36.7011	36.6726	36.2541	42.9546	31.2906	25.1272	ENSG00000090686.15	USP48	chr1:21678297-21783606	MB468_CTRL	MB468_W2	OK	36.5426	33.1241	-0.141698	-0.29874	0.53205	0.716148	no
ENSG00000090776.5	EFNB1	5.04472	4.61818	3.61898	3.10594	2.50185	3.43334	ENSG00000090776.5	EFNB1	chrX:68828996-68842147	MB468_CTRL	MB468_W2	OK	4.42729	3.01371	-0.554885	-1.56572	0.00685	0.0310111	yes
ENSG00000090857.13	PDPR	7.31083	5.36445	6.84759	6.79032	7.38046	5.40074	ENSG00000090857.13	PDPR	chr16:70113625-70187361	MB468_CTRL	MB468_W2	OK	6.50762	6.52384	0.00359126	0.0058129	0.99005	0.994936	no
ENSG00000090861.15	AARS	41.3553	42.7989	38.4465	29.7939	27.1713	36.8491	ENSG00000090861.15	AARS	chr16:70252294-70289543	MB468_CTRL	MB468_W2	OK	40.8669	31.2714	-0.386087	-1.24658	0.02885	0.0971349	no
ENSG00000090863.11	GLG1	46.0325	47.7933	46.0887	20.8412	32.9534	32.1206	ENSG00000090863.11	GLG1	chr16:74447426-74607144	MB468_CTRL	MB468_W2	OK	46.6382	28.6384	-0.70356	-2.59677	5e-05	0.000470501	yes
ENSG00000090889.11	KIF4A	14.0422	14.2827	16.323	11.4101	12.7321	9.43566	ENSG00000090889.11	KIF4A	chrX:70286594-70420832	MB468_CTRL	MB468_W2	OK	14.8826	11.1926	-0.411081	-1.09138	0.0582	0.164417	no
ENSG00000090905.18	TNRC6A	8.60218	9.63747	9.55408	12.9712	13.5018	20.0492	ENSG00000090905.18	TNRC6A	chr16:24610208-24827632	MB468_CTRL	MB468_W2	OK	9.26458	15.5074	0.743161	0.948306	0.01395	0.0549603	no
ENSG00000090924.14	PLEKHG2	7.88584	7.87593	5.54036	11.701	11.5028	14.5978	ENSG00000090924.14	PLEKHG2	chr19:39412584-39428415	MB468_CTRL	MB468_W2	OK	7.10071	12.6006	0.827453	1.08738	0.00395	0.0198813	yes
ENSG00000090932.10	DLL3	2.55885	2.4413	2.09073	3.77342	3.54995	2.74954	ENSG00000090932.10	DLL3	chr19:39498894-39508481	MB468_CTRL	MB468_W2	OK	2.36362	3.35763	0.506444	0.533113	0.21475	0.407761	no
ENSG00000090971.4	NAT14	5.35762	3.2918	2.82762	6.05271	7.23805	11.3206	ENSG00000090971.4	NAT14	chr19:55485003-55487568	MB468_CTRL	MB468_W2	OK	3.82568	8.2038	1.10058	1.31291	0.00975	0.0411939	yes
ENSG00000090975.12	PITPNM2	0.759134	0.964033	1.53427	1.81822	2.47228	1.65594	ENSG00000090975.12	PITPNM2	chr12:122983479-123150015	MB468_CTRL	MB468_W2	NOTEST	1.08581	1.98214	0.868286	0	1	1	no
ENSG00000090989.17	EXOC1	6.88718	7.01132	9.07419	5.42802	8.49942	6.53503	ENSG00000090989.17	EXOC1	chr4:55853615-55905034	MB468_CTRL	MB468_W2	OK	7.65757	6.82082	-0.166941	-0.361364	0.45555	0.654777	no
ENSG00000091009.7	RBM27	10.6641	15.8699	8.75931	5.86751	15.8483	5.72024	ENSG00000091009.7	RBM27	chr5:146203549-146376963	MB468_CTRL	MB468_W2	OK	11.7645	9.14535	-0.363325	-0.360863	0.4537	0.653194	no
ENSG00000091010.4	POU4F3	0	0	0	0	0	1.32242	ENSG00000091010.4	POU4F3	chr5:146203549-146376963	MB468_CTRL	MB468_W2	NOTEST	0	0.440807	inf	0	1	1	no
ENSG00000091039.16	OSBPL8	38.1837	25.9921	26.2941	29.8744	15.0082	35.8385	ENSG00000091039.16	OSBPL8	chr12:76351796-76559809	MB468_CTRL	MB468_W2	OK	30.1566	26.907	-0.164492	-0.279412	0.5754	0.748653	no
ENSG00000091073.19	DTX2	11.637	13.8324	14.5991	11.3508	15.3703	11.2255	ENSG00000091073.19	DTX2	chr7:76461675-76505995	MB468_CTRL	MB468_W2	OK	13.3562	12.6489	-0.0784959	-0.160552	0.6992	0.835984	no
ENSG00000091106.18	NLRC4	0	0	0	0	0	0.12534	ENSG00000091106.18	NLRC4	chr2:32224452-32265854	MB468_CTRL	MB468_W2	NOTEST	0	0.0417801	inf	0	1	1	no
ENSG00000091127.13	PUS7	17.3284	18.86	20.3692	18.5366	22.2369	28.4994	ENSG00000091127.13	PUS7	chr7:105439660-105522267	MB468_CTRL	MB468_W2	OK	18.8525	23.091	0.29257	0.705427	0.14425	0.312326	no
ENSG00000091128.12	LAMB4	0	0	0	0	0	0	ENSG00000091128.12	LAMB4	chr7:108023547-108130356	MB468_CTRL	MB468_W2	NOTEST	0	0	0	0	1	1	no
ENSG00000091129.19	NRCAM	0	0.0496055	0.395931	0	0	0	ENSG00000091129.19	NRCAM	chr7:108147622-108456717	MB468_CTRL	MB468_W2	NOTEST	0.148512	0	#NAME?	0	1	1	no
ENSG00000091136.13	LAMB1	17.6983	19.0079	25.0561	17.979	13.8262	20.9846	ENSG00000091136.13	LAMB1	chr7:107890969-108003255	MB468_CTRL	MB468_W2	OK	20.5874	17.5966	-0.226469	-0.36587	0.4542	0.653719	no
ENSG00000091137.11	SLC26A4	0	0.0834062	0.0445737	0	0	1.14179	ENSG00000091137.11	SLC26A4	chr7:107653967-107717809	MB468_CTRL	MB468_W2	NOTEST	0.04266	0.380596	3.1573	0	1	1	no
ENSG00000091138.12	SLC26A3	0	0	0	0	0	0	ENSG00000091138.12	SLC26A3	chr7:107765466-107803225	MB468_CTRL	MB468_W2	NOTEST	0	0	0	0	1	1	no
ENSG00000091140.12	DLD	34.0315	40.8139	41.325	21.2379	31.489	34.0504	ENSG00000091140.12	DLD	chr7:107890969-108003255	MB468_CTRL	MB468_W2	OK	38.7235	28.9258	-0.420853	-1.00926	0.0668	0.181953	no
ENSG00000091157.13	WDR7	6.40549	7.70093	6.36042	11.5292	7.42662	9.30237	ENSG00000091157.13	WDR7	chr18:56597207-57038845	MB468_CTRL	MB468_W2	OK	6.82228	9.41939	0.46538	0.505376	0.27325	0.477026	no
ENSG00000091164.12	TXNL1	41.6835	44.119	48.6383	40.751	38.7078	34.5348	ENSG00000091164.12	TXNL1	chr18:56597207-57038845	MB468_CTRL	MB468_W2	OK	44.8136	37.9979	-0.238018	-1.16355	0.03315	0.10759	no
ENSG00000091181.19	IL5RA	0.334258	0	0	0	0	0	ENSG00000091181.19	IL5RA	chr3:2098812-3126613	MB468_CTRL	MB468_W2	NOTEST	0.111419	0	#NAME?	0	1	1	no
ENSG00000091262.14	ABCC6	0	0	0	0	0	0.149509	ENSG00000091262.14	ABCC6	chr16:16148927-16224261	MB468_CTRL	MB468_W2	NOTEST	0	0.0498364	inf	0	1	1	no
ENSG00000091317.7	CMTM6	51.2518	52.9358	50.9573	39.2859	34.3761	33.7386	ENSG00000091317.7	CMTM6	chr3:32391670-32503408	MB468_CTRL	MB468_W2	OK	51.715	35.8002	-0.530614	-2.93325	5e-05	0.000470501	yes
ENSG00000091409.14	ITGA6	31.7514	31.6565	32.6763	17.6565	21.3195	21.2276	ENSG00000091409.14	ITGA6	chr2:172427353-172608669	MB468_CTRL	MB468_W2	OK	32.0281	20.0678	-0.674451	-1.48431	0.0069	0.0311874	yes
ENSG00000091428.17	RAPGEF4	0.529783	1.17437	0.855214	0	3.11119	0.108158	ENSG00000091428.17	RAPGEF4	chr2:172677140-173052893	MB468_CTRL	MB468_W2	NOTEST	0.853122	1.07312	0.330981	0	1	1	no
ENSG00000091436.16	AC013461.1	33.9861	39.2194	39.3001	19.4664	20.4567	21.2363	ENSG00000091436.16	AC013461.1	chr2:173075434-173282036	MB468_CTRL	MB468_W2	OK	37.5019	20.3865	-0.879352	-4.78288	5e-05	0.000470501	yes
ENSG00000091482.5	SMPX	0.339284	0.327922	0.258798	0	1.31018	0	ENSG00000091482.5	SMPX	chrX:21705971-21758163	MB468_CTRL	MB468_W2	NOTEST	0.308668	0.436725	0.500669	0	1	1	no
ENSG00000091483.6	FH	110.178	114.336	108.291	69.8625	58.1554	59.5208	ENSG00000091483.6	FH	chr1:241497602-241519761	MB468_CTRL	MB468_W2	OK	110.935	62.5129	-0.827493	-4.34274	5e-05	0.000470501	yes
ENSG00000091490.10	SEL1L3	6.29344	9.02138	9.9547	8.23635	7.0281	4.61666	ENSG00000091490.10	SEL1L3	chr4:25747426-25929874	MB468_CTRL	MB468_W2	OK	8.42317	6.62704	-0.346	-0.431258	0.29425	0.501155	no
ENSG00000091513.14	TF	1.62009	1.13085	1.69881	1.41477	2.94764	3.53376	ENSG00000091513.14	TF	chr3:133661997-133779006	MB468_CTRL	MB468_W2	NOTEST	1.48325	2.63206	0.827433	0	1	1	no
ENSG00000091527.15	CDV3	88.7327	90.1246	90.5617	55.6047	59.7579	66.8851	ENSG00000091527.15	CDV3	chr3:133573729-133590261	MB468_CTRL	MB468_W2	OK	89.8063	60.7492	-0.563951	-3.32667	5e-05	0.000470501	yes
ENSG00000091536.16	MYO15A	0	0	0.0634432	0	0.128693	0	ENSG00000091536.16	MYO15A	chr17:18087885-18209954	MB468_CTRL	MB468_W2	NOTEST	0.0211477	0.0428975	1.02039	0	1	1	no
ENSG00000091542.8	ALKBH5	48.4147	49.0592	49.833	34.9825	33.5806	43.5295	ENSG00000091542.8	ALKBH5	chr17:18087885-18209954	MB468_CTRL	MB468_W2	OK	49.1023	37.3642	-0.394133	-2.11044	0.0004	0.00299751	yes
ENSG00000091592.15	NLRP1	0	0.0366626	0.392791	1.93716	0.222619	1.64143	ENSG00000091592.15	NLRP1	chr17:5499426-5619424	MB468_CTRL	MB468_W2	NOTEST	0.143151	1.26707	3.14588	0	1	1	no
ENSG00000091622.15	PITPNM3	8.00138	8.437	6.12108	8.41929	9.0301	8.8211	ENSG00000091622.15	PITPNM3	chr17:6444414-6556494	MB468_CTRL	MB468_W2	OK	7.51982	8.75683	0.219711	0.447339	0.43145	0.633706	no
ENSG00000091640.7	SPAG7	7.74599	9.10386	10.1046	2.74214	9.28912	7.89551	ENSG00000091640.7	SPAG7	chr17:4959225-4967872	MB468_CTRL	MB468_W2	OK	8.98482	6.64226	-0.435816	-0.689486	0.16005	0.335343	no
ENSG00000091651.8	ORC6	20.847	25.995	24.4463	40.2637	43.5598	39.2506	ENSG00000091651.8	ORC6	chr16:46689642-46698394	MB468_CTRL	MB468_W2	OK	23.7627	41.0247	0.787792	3.29299	5e-05	0.000470501	yes
ENSG00000091656.15	ZFHX4	0	0.0101456	0	0	0	0	ENSG00000091656.15	ZFHX4	chr8:76403997-76867285	MB468_CTRL	MB468_W2	NOTEST	0.00338188	0	#NAME?	0	1	1	no
ENSG00000091664.7	SLC17A6	0	0	0	0	0	0	ENSG00000091664.7	SLC17A6	chr11:22283729-22379503	MB468_CTRL	MB468_W2	NOTEST	0	0	0	0	1	1	no
ENSG00000091704.9	CPA1	0	0	0	0	0	1.37712	ENSG00000091704.9	CPA1	chr7:130380338-130388114	MB468_CTRL	MB468_W2	NOTEST	0	0.459039	inf	0	1	1	no
ENSG00000091732.15	ZC3HC1	7.79844	9.5581	8.85735	10.0842	6.15181	9.29266	ENSG00000091732.15	ZC3HC1	chr7:129953233-130051451	MB468_CTRL	MB468_W2	OK	8.73796	8.50957	-0.0382111	-0.0683734	0.88855	0.946059	no
ENSG00000091831.21	ESR1	2.24587	0.930348	0.869054	3.43944	2.3681	1.67815	ENSG00000091831.21	ESR1	chr6:151656690-152637801	MB468_CTRL	MB468_W2	NOTEST	1.34842	2.49523	0.887901	0	1	1	no
ENSG00000091844.7	RGS17	0	0	0	0	0	0	ENSG00000091844.7	RGS17	chr6:153004458-153131249	MB468_CTRL	MB468_W2	NOTEST	0	0	0	0	1	1	no
ENSG00000091879.13	ANGPT2	0	0	0.0783924	0	0	0	ENSG00000091879.13	ANGPT2	chr8:6403550-6708209	MB468_CTRL	MB468_W2	NOTEST	0.0261308	0	#NAME?	0	1	1	no
ENSG00000091947.9	TMEM101	6.87802	12.5562	11.4943	8.32847	12.9729	15.3999	ENSG00000091947.9	TMEM101	chr17:44011187-44023946	MB468_CTRL	MB468_W2	OK	10.3095	12.2337	0.246891	0.612664	0.2122	0.404617	no
ENSG00000091972.18	CD200	0	0	0	0	0	0	ENSG00000091972.18	CD200	chr3:112302477-112362812	MB468_CTRL	MB468_W2	NOTEST	0	0	0	0	1	1	no
ENSG00000091986.15	CCDC80	1.97931	3.26474	5.31756	5.44685	2.29201	7.56122	ENSG00000091986.15	CCDC80	chr3:112596793-112649530	MB468_CTRL	MB468_W2	OK	3.52054	5.10003	0.53471	0.628587	0.2119	0.404171	no
ENSG00000092010.14	PSME1	23.7462	26.8261	26.4116	29.508	43.6024	39.6592	ENSG00000092010.14	PSME1	chr14:24136157-24141588	MB468_CTRL	MB468_W2	OK	25.6613	37.5899	0.550749	2.66465	5e-05	0.000470501	yes
ENSG00000092020.10	PPP2R3C	12.0681	9.17096	7.3383	10.1499	14.0899	10.448	ENSG00000092020.10	PPP2R3C	chr14:35044906-35317493	MB468_CTRL	MB468_W2	OK	9.52579	11.5626	0.279552	0.350161	0.4323	0.634395	no
ENSG00000092036.17	HAUS4	8.25644	12.6034	12.53	15.8721	11.0923	13.5279	ENSG00000092036.17	HAUS4	chr14:22929608-22982642	MB468_CTRL	MB468_W2	OK	11.1299	13.4974	0.27824	0.348565	0.39065	0.595992	no
ENSG00000092051.16	JPH4	0	0	0	0	0	0	ENSG00000092051.16	JPH4	chr14:23511759-23578800	MB468_CTRL	MB468_W2	NOTEST	0	0	0	0	1	1	no
ENSG00000092054.12	MYH7	0	0	0	0	0	0	ENSG00000092054.12	MYH7	chr14:23412737-23435718	MB468_CTRL	MB468_W2	NOTEST	0	0	0	0	1	1	no
ENSG00000092067.5	CEBPE	0	0	0	0	0	0	ENSG00000092067.5	CEBPE	chr14:23117303-23119616	MB468_CTRL	MB468_W2	NOTEST	0	0	0	0	1	1	no
ENSG00000092068.19	SLC7A8	0.548883	0.164845	0.328393	0	0.581521	0	ENSG00000092068.19	SLC7A8	chr14:23125294-23183674	MB468_CTRL	MB468_W2	NOTEST	0.347374	0.19384	-0.84162	0	1	1	no
ENSG00000092094.10	OSGEP	38.6371	46.8748	41.4643	46.0145	58.6	63.3954	ENSG00000092094.10	OSGEP	chr14:20446410-20455105	MB468_CTRL	MB468_W2	OK	42.3254	56.0033	0.403987	1.81699	0.00185	0.0107119	yes
ENSG00000092096.15	SLC22A17	1.1131	0.873732	0.353715	1.15729	1.45285	0	ENSG00000092096.15	SLC22A17	chr14:23346305-23352912	MB468_CTRL	MB468_W2	NOTEST	0.780183	0.870047	0.157282	0	1	1	no
ENSG00000092098.16	RNF31	9.48347	11.0505	8.99001	12.5068	34.4195	19	ENSG00000092098.16	RNF31	chr14:24143361-24167402	MB468_CTRL	MB468_W2	OK	9.84131	21.9754	1.15897	1.31128	0.00215	0.0121085	yes
ENSG00000092108.20	SCFD1	8.75834	13.1107	11.541	9.22152	18.5053	8.08711	ENSG00000092108.20	SCFD1	chr14:30622111-30822702	MB468_CTRL	MB468_W2	OK	11.1367	11.938	0.100238	0.119004	0.763	0.876276	no
ENSG00000092140.14	G2E3	7.20777	6.44053	8.71759	10.8025	15.7534	7.52658	ENSG00000092140.14	G2E3	chr14:30437991-30620063	MB468_CTRL	MB468_W2	OK	7.4553	11.3609	0.607733	0.973445	0.01795	0.0668465	no
ENSG00000092148.12	HECTD1	37.252	46.8117	42.727	28.0112	26.2019	38.9018	ENSG00000092148.12	HECTD1	chr14:31100111-31207804	MB468_CTRL	MB468_W2	OK	42.2636	31.0383	-0.445364	-0.978744	0.06975	0.187755	no
ENSG00000092199.17	HNRNPC	383.752	374.799	401.229	210.888	253.278	223.303	ENSG00000092199.17	HNRNPC	chr14:21209135-21269494	MB468_CTRL	MB468_W2	OK	386.593	229.156	-0.754484	-3.14456	5e-05	0.000470501	yes
ENSG00000092200.12	RPGRIP1	0.624078	0.0795356	0.445556	0.377326	0	0.123772	ENSG00000092200.12	RPGRIP1	chr14:21287938-21351301	MB468_CTRL	MB468_W2	NOTEST	0.383057	0.167033	-1.19743	0	1	1	no
ENSG00000092201.9	SUPT16H	36.1903	47.1621	39.5455	27.9574	31.6508	29.5949	ENSG00000092201.9	SUPT16H	chr14:21351471-21384266	MB468_CTRL	MB468_W2	OK	40.966	29.7344	-0.462295	-1.51446	0.00805	0.0353098	yes
ENSG00000092203.13	TOX4	21.0817	22.5101	16.6839	16.5714	14.5992	13.7244	ENSG00000092203.13	TOX4	chr14:21459019-21511375	MB468_CTRL	MB468_W2	OK	20.0919	14.965	-0.425021	-0.89056	0.0747	0.19727	no
ENSG00000092208.16	GEMIN2	5.69474	4.44864	4.83504	10.8061	8.61675	7.62673	ENSG00000092208.16	GEMIN2	chr14:39114222-39136973	MB468_CTRL	MB468_W2	OK	4.99281	9.01654	0.852722	1.30346	0.00305	0.0161474	yes
ENSG00000092295.11	TGM1	4.37292	4.70785	3.85758	3.34033	6.16754	1.39288	ENSG00000092295.11	TGM1	chr14:24249113-24264432	MB468_CTRL	MB468_W2	OK	4.31278	3.63359	-0.247226	-0.230294	0.5885	0.757975	no
ENSG00000092330.15	TINF2	10.6803	12.6209	14.3666	15.2999	8.37474	7.08125	ENSG00000092330.15	TINF2	chr14:24239642-24242674	MB468_CTRL	MB468_W2	OK	12.5559	10.252	-0.292471	-0.470615	0.31405	0.521761	no
ENSG00000092345.13	DAZL	0	0	0	0	0	0	ENSG00000092345.13	DAZL	chr3:16586791-16670306	MB468_CTRL	MB468_W2	NOTEST	0	0	0	0	1	1	no
ENSG00000092377.13	TBL1Y	0	0	0	0	0	0	ENSG00000092377.13	TBL1Y	chrY:6910685-7091683	MB468_CTRL	MB468_W2	NOTEST	0	0	0	0	1	1	no
ENSG00000092421.16	SEMA6A	0	0	0.026543	0	0	0	ENSG00000092421.16	SEMA6A	chr5:116443615-116591398	MB468_CTRL	MB468_W2	NOTEST	0.00884768	0	#NAME?	0	1	1	no
ENSG00000092439.13	TRPM7	16.1779	16.4092	15.1526	26.0803	24.0631	13.5828	ENSG00000092439.13	TRPM7	chr15:50552472-50686815	MB468_CTRL	MB468_W2	OK	15.9132	21.242	0.416695	0.725552	0.1637	0.340731	no
ENSG00000092445.11	TYRO3	3.94354	5.36349	7.99567	7.21779	6.03868	9.68329	ENSG00000092445.11	TYRO3	chr15:41557674-41583586	MB468_CTRL	MB468_W2	OK	5.76757	7.64659	0.406853	0.540944	0.272	0.475455	no
ENSG00000092470.11	WDR76	16.5504	18.9968	19.3765	8.92696	6.46927	10.6074	ENSG00000092470.11	WDR76	chr15:43826962-43868419	MB468_CTRL	MB468_W2	OK	18.3079	8.66787	-1.07872	-3.37104	5e-05	0.000470501	yes
ENSG00000092529.23	CAPN3	0	0	0.285395	0	0.46326	0.472285	ENSG00000092529.23	CAPN3	chr15:42208412-42412318	MB468_CTRL	MB468_W2	NOTEST	0.0951316	0.311848	1.71285	0	1	1	no
ENSG00000092531.9	SNAP23	7.50945	8.21999	8.47834	10.1326	10.0028	9.85857	ENSG00000092531.9	SNAP23	chr15:42491232-42548802	MB468_CTRL	MB468_W2	OK	8.06926	9.998	0.309202	0.513385	0.16005	0.335343	no
ENSG00000092607.13	TBX15	0.100386	0.145162	0.194785	0	0.336096	0	ENSG00000092607.13	TBX15	chr1:118883045-118989556	MB468_CTRL	MB468_W2	NOTEST	0.146778	0.112032	-0.389721	0	1	1	no
ENSG00000092621.11	PHGDH	108.098	131.271	137.466	83.3583	99.5951	108.285	ENSG00000092621.11	PHGDH	chr1:119659797-119744215	MB468_CTRL	MB468_W2	OK	125.612	97.0794	-0.371733	-2.3919	0.00015	0.00126619	yes
ENSG00000092758.15	COL9A3	0.548148	0.513733	0.337793	0	1.54399	0	ENSG00000092758.15	COL9A3	chr20:62816243-62861763	MB468_CTRL	MB468_W2	NOTEST	0.466558	0.514664	0.141572	0	1	1	no
ENSG00000092820.17	EZR	99.9769	106.931	111.686	41.4593	50.0846	59.5693	ENSG00000092820.17	EZR	chr6:158765740-158820593	MB468_CTRL	MB468_W2	OK	106.198	50.3711	-1.07609	-6.78639	5e-05	0.000470501	yes
ENSG00000092841.18	MYL6	246.31	259.301	267.081	148.282	217.483	200.624	ENSG00000092841.18	MYL6	chr12:56150795-56190284	MB468_CTRL	MB468_W2	OK	257.564	188.796	-0.448099	-1.84985	0.00195	0.0111744	yes
ENSG00000092847.11	AGO1	13.7765	17.4751	16.1729	12.069	12.9668	15.0247	ENSG00000092847.11	AGO1	chr1:35869807-35930528	MB468_CTRL	MB468_W2	OK	15.8082	13.3535	-0.243452	-1.48739	0.0109	0.0451369	yes
ENSG00000092850.11	TEKT2	0	0.0721103	0	0	1.01732	0.211056	ENSG00000092850.11	TEKT2	chr1:36084074-36088275	MB468_CTRL	MB468_W2	NOTEST	0.0240368	0.409457	4.0904	0	1	1	no
ENSG00000092853.13	CLSPN	49.3744	40.8076	38.4088	21.6269	11.8643	23.4801	ENSG00000092853.13	CLSPN	chr1:35720217-35769967	MB468_CTRL	MB468_W2	OK	42.8636	18.9904	-1.17448	-1.97806	0.00045	0.00330662	yes
ENSG00000092871.16	RFFL	13.2372	13.6805	10.4315	12.6191	10.6758	7.62727	ENSG00000092871.16	RFFL	chr17:34927858-35121522	MB468_CTRL	MB468_W2	OK	12.4498	10.3074	-0.272436	-0.314357	0.49525	0.68713	no
ENSG00000092929.11	UNC13D	26.4582	30.6094	26.9067	32.4807	41.1893	32.3024	ENSG00000092929.11	UNC13D	chr17:75827224-75844717	MB468_CTRL	MB468_W2	OK	27.9915	35.3242	0.335668	0.918505	0.08195	0.210545	no
ENSG00000092931.11	MFSD11	16.4827	16.6043	16.5611	20.1799	18.0173	31.8014	ENSG00000092931.11	MFSD11	chr17:76726829-76781449	MB468_CTRL	MB468_W2	OK	16.5494	23.3329	0.495589	0.590257	0.2399	0.438807	no
ENSG00000092964.17	DPYSL2	27.1276	30.578	28.8159	15.1936	14.5253	15.2081	ENSG00000092964.17	DPYSL2	chr8:26379258-26658178	MB468_CTRL	MB468_W2	OK	28.8405	14.9757	-0.945474	-3.71535	5e-05	0.000470501	yes
ENSG00000092969.11	TGFB2	69.3611	59.7722	52.6433	44.3533	36.6686	34.8264	ENSG00000092969.11	TGFB2	chr1:218346234-218444619	MB468_CTRL	MB468_W2	OK	60.5922	38.6161	-0.649929	-1.58603	0.0051	0.0244538	yes
ENSG00000092978.10	GPATCH2	10.4759	12.8169	11.3621	17.1127	10.2005	9.31572	ENSG00000092978.10	GPATCH2	chr1:217426991-217631082	MB468_CTRL	MB468_W2	OK	11.5517	12.2097	0.0799232	0.172782	0.7301	0.855514	no
ENSG00000093000.18	NUP50	36.6258	34.7745	33.4151	40.8063	48.9639	49.7444	ENSG00000093000.18	NUP50	chr22:45163840-45188015	MB468_CTRL	MB468_W2	OK	34.9385	46.5049	0.412565	1.35145	0.0116	0.0473667	yes
ENSG00000093009.9	CDC45	18.4479	17.2238	26.2933	20.7231	32.0777	18.5351	ENSG00000093009.9	CDC45	chr22:19479458-19520612	MB468_CTRL	MB468_W2	OK	20.655	23.7786	0.203173	0.459043	0.38045	0.587448	no
ENSG00000093010.12	COMT	100.448	104.65	102.453	72.6336	79.9496	69.2278	ENSG00000093010.12	COMT	chr22:19875516-20016808	MB468_CTRL	MB468_W2	OK	102.517	73.937	-0.471496	-1.97328	0.0002	0.00163443	yes
ENSG00000093072.15	CECR1	0.0944679	0	0	0	0	0	ENSG00000093072.15	CECR1	chr22:17178789-17221989	MB468_CTRL	MB468_W2	NOTEST	0.0314893	0	#NAME?	0	1	1	no
ENSG00000093100.13	XXbac-B461K10.4	1.68233	2.36449	0.838286	1.8211	0.798999	1.13878	ENSG00000093100.13	XXbac-B461K10.4	chr22:17787648-18024559	MB468_CTRL	MB468_W2	NOTEST	1.62837	1.25296	-0.378088	0	1	1	no
ENSG00000093134.14	VNN3	0.589797	0.463318	0.812849	0.88059	2.05777	0	ENSG00000093134.14	VNN3	chr6:132722786-132734765	MB468_CTRL	MB468_W2	NOTEST	0.621988	0.979455	0.655093	0	1	1	no
ENSG00000093144.18	ECHDC1	204.385	193.335	242.013	125.73	148.873	154.472	ENSG00000093144.18	ECHDC1	chr6:127288709-127343609	MB468_CTRL	MB468_W2	OK	213.244	143.025	-0.576239	-1.62496	0.0037	0.018877	yes
ENSG00000093167.17	LRRFIP2	30.3866	28.5506	26.4906	22.069	46.6535	31.9381	ENSG00000093167.17	LRRFIP2	chr3:37052655-37183689	MB468_CTRL	MB468_W2	OK	28.476	33.5535	0.23672	0.580707	0.2663	0.46862	no
ENSG00000093183.13	SEC22C	19.9288	15.6781	21.5592	27.5675	28.5074	24.3849	ENSG00000093183.13	SEC22C	chr3:42547968-42665854	MB468_CTRL	MB468_W2	OK	19.0554	26.82	0.493109	0.969279	0.0719	0.192062	no
ENSG00000093217.9	XYLB	1.53009	1.56948	1.03921	0.77213	7.04635	6.12403	ENSG00000093217.9	XYLB	chr3:38346759-38421348	MB468_CTRL	MB468_W2	OK	1.37959	4.64751	1.75222	1.29943	0.0018	0.010467	yes
ENSG00000094631.18	HDAC6	19.3926	19.4365	22.3806	40.7022	35.7567	35.4094	ENSG00000094631.18	HDAC6	chrX:48801376-48824982	MB468_CTRL	MB468_W2	OK	20.4032	37.2894	0.86997	1.87676	0.0001	0.000882755	yes
ENSG00000094755.16	GABRP	0.19513	0.632997	0.825644	1.25026	0.423915	1.79466	ENSG00000094755.16	GABRP	chr5:170747046-170814047	MB468_CTRL	MB468_W2	NOTEST	0.551257	1.15628	1.06869	0	1	1	no
ENSG00000094796.4	KRT31	0.0891948	0	0	0	0	0	ENSG00000094796.4	KRT31	chr17:41393723-41397592	MB468_CTRL	MB468_W2	NOTEST	0.0297316	0	#NAME?	0	1	1	no
ENSG00000094804.9	CDC6	18.9228	25.1487	24.5966	16.678	12.7133	18.3439	ENSG00000094804.9	CDC6	chr17:40287632-40304657	MB468_CTRL	MB468_W2	OK	22.8894	15.9117	-0.524589	-1.18558	0.0309	0.102326	no
ENSG00000094841.13	UPRT	3.34429	2.96387	3.94692	2.39497	3.56253	3.71452	ENSG00000094841.13	UPRT	chrX:75274084-75304600	MB468_CTRL	MB468_W2	OK	3.41836	3.22401	-0.084451	-0.124101	0.77395	0.882602	no
ENSG00000094880.10	CDC23	21.1873	26.5319	29.0495	21.0394	15.8407	18.5962	ENSG00000094880.10	CDC23	chr5:138139765-138213343	MB468_CTRL	MB468_W2	OK	25.5896	18.4921	-0.468648	-0.711994	0.1476	0.317051	no
ENSG00000094914.12	AAAS	29.4855	28.6231	22.9487	19.6896	29.7615	42.5742	ENSG00000094914.12	AAAS	chr12:53307455-53324864	MB468_CTRL	MB468_W2	OK	27.0191	30.6751	0.183088	0.535963	0.2864	0.492384	no
ENSG00000094916.14	CBX5	61.8168	66.2449	62.9037	36.7589	40.2683	41.235	ENSG00000094916.14	CBX5	chr12:54230939-54351849	MB468_CTRL	MB468_W2	OK	63.6551	39.4207	-0.691322	-1.75796	0.00035	0.00266809	yes
ENSG00000094963.13	FMO2	0	0	0.367982	0.146804	1.20595	0.407926	ENSG00000094963.13	FMO2	chr1:171185207-171227788	MB468_CTRL	MB468_W2	NOTEST	0.122661	0.586895	2.25843	0	1	1	no
ENSG00000094975.13	SUCO	8.2589	11.9202	11.658	8.17958	18.7278	11.8835	ENSG00000094975.13	SUCO	chr1:172532348-172611833	MB468_CTRL	MB468_W2	OK	10.6124	12.9303	0.285007	0.540487	0.28805	0.494131	no
ENSG00000095002.13	MSH2	28.9656	28.4298	31.3801	14.6015	12.3385	14.3003	ENSG00000095002.13	MSH2	chr2:47402968-47570939	MB468_CTRL	MB468_W2	OK	29.5918	13.7468	-1.10611	-5.12663	5e-05	0.000470501	yes
ENSG00000095015.5	MAP3K1	8.05319	7.92908	8.38907	7.2636	8.76311	7.97875	ENSG00000095015.5	MAP3K1	chr5:56815573-56896152	MB468_CTRL	MB468_W2	OK	8.12378	8.00182	-0.0218234	-0.0954316	0.8603	0.931842	no
ENSG00000095059.15	DHPS	43.4997	49.5479	61.9767	76.4703	77.9684	76.5253	ENSG00000095059.15	DHPS	chr19:12643274-12681902	MB468_CTRL	MB468_W2	OK	51.6748	76.988	0.575173	1.64247	0.00265	0.0144042	yes
ENSG00000095066.11	HOOK2	28.8114	34.1231	29.7128	63.5037	86.9598	90.0802	ENSG00000095066.11	HOOK2	chr19:12763002-12874951	MB468_CTRL	MB468_W2	OK	30.8825	80.1812	1.37648	2.96106	5e-05	0.000470501	yes
ENSG00000095139.13	ARCN1	90.1301	103.403	94.0773	54.4479	63.8211	66.3018	ENSG00000095139.13	ARCN1	chr11:118436489-118603033	MB468_CTRL	MB468_W2	OK	95.8701	61.5236	-0.63994	-1.95982	0.0008	0.00535066	yes
ENSG00000095203.14	EPB41L4B	12.126	15.9407	15.4111	7.57819	11.1226	12.1594	ENSG00000095203.14	EPB41L4B	chr9:109171974-109320964	MB468_CTRL	MB468_W2	OK	14.4926	10.2867	-0.494536	-2.36436	5e-05	0.000470501	yes
ENSG00000095209.11	TMEM38B	17.3782	24.1611	23.8977	13.1861	18.7574	16.4747	ENSG00000095209.11	TMEM38B	chr9:105694543-105776612	MB468_CTRL	MB468_W2	OK	21.8123	16.1394	-0.434556	-1.17585	0.0247	0.085982	no
ENSG00000095261.13	PSMD5	18.2749	18.8237	21.5841	12.5834	16.6597	11.9147	ENSG00000095261.13	PSMD5	chr9:120815495-120851355	MB468_CTRL	MB468_W2	OK	19.5609	13.7193	-0.511769	-0.704458	0.0833	0.213087	no
ENSG00000095303.14	PTGS1	0.844399	0.0911669	0.0402583	0.244385	0	0	ENSG00000095303.14	PTGS1	chr9:122370529-122395703	MB468_CTRL	MB468_W2	NOTEST	0.325275	0.0814615	-1.99747	0	1	1	no
ENSG00000095319.14	NUP188	32.0088	30.3568	27.0668	17.7727	32.2128	31.1365	ENSG00000095319.14	NUP188	chr9:128920894-129028303	MB468_CTRL	MB468_W2	OK	29.8108	27.0407	-0.140704	-0.262099	0.63855	0.795058	no
ENSG00000095321.16	CRAT	15.6025	14.651	14.8118	12.9348	10.5241	10.9269	ENSG00000095321.16	CRAT	chr9:129094809-129148946	MB468_CTRL	MB468_W2	OK	15.0218	11.4619	-0.390206	-0.962964	0.06175	0.171719	no
ENSG00000095370.19	SH2D3C	0.243865	0	0	0	0	0.734149	ENSG00000095370.19	SH2D3C	chr9:127738316-127778741	MB468_CTRL	MB468_W2	NOTEST	0.0812882	0.244716	1.58999	0	1	1	no
ENSG00000095380.10	NANS	52.1398	60.2759	63.6139	29.4683	37.1303	39.3603	ENSG00000095380.10	NANS	chr9:98056738-98119212	MB468_CTRL	MB468_W2	OK	58.6765	35.3196	-0.732313	-3.0222	5e-05	0.000470501	yes
ENSG00000095383.19	TBC1D2	11.8788	16.6866	15.7091	6.06654	8.47183	8.11336	ENSG00000095383.19	TBC1D2	chr9:98198998-98255721	MB468_CTRL	MB468_W2	OK	14.7581	7.55057	-0.966852	-3.18361	5e-05	0.000470501	yes
ENSG00000095397.13	WHRN	1.82176	3.79967	2.72573	5.16404	5.19964	4.50603	ENSG00000095397.13	WHRN	chr9:114402079-114505450	MB468_CTRL	MB468_W2	OK	2.78238	4.95657	0.833021	0.986195	0.04325	0.131924	no
ENSG00000095464.9	PDE6C	0	0	0	0	0	0	ENSG00000095464.9	PDE6C	chr10:93612587-93666010	MB468_CTRL	MB468_W2	NOTEST	0	0	0	0	1	1	no
ENSG00000095485.16	CWF19L1	7.11297	13.214	12.1874	16.8905	12.2378	13.612	ENSG00000095485.16	CWF19L1	chr10:100229666-100267680	MB468_CTRL	MB468_W2	OK	10.8381	14.2468	0.394521	0.767653	0.1484	0.318117	no
ENSG00000095539.15	SEMA4G	0	0	0	0	0	0	ENSG00000095539.15	SEMA4G	chr10:100969457-100994401	MB468_CTRL	MB468_W2	NOTEST	0	0	0	0	1	1	no
[truncated: 35,967 more rows]
